# Supplementary material for: A-to-I RNA editing promotes developmental stage–specific gene and lncRNA expression
Source: HighWire-hosted journal article supplement (doi:10.1101/gr.211169.116), 2016-12-28
Supplement: Supplemental_Table_S2.xlsx [file Supplemental_Table_S2.xlsx]

## Sheet:  all repetitive sites
Chromosome name	Position in chromosome	Nucleotide changed	Gene name in region	Orientation of the gene	Position in gene
chrI	10020137	A	F10G8.1	sense	3utr
chrI	10020182	T	F10G8.1	sense	3utr
chrI	1002173	A	ND	NA	intergenic
chrI	1002178	A	ND	NA	intergenic
chrI	100755	T	Y48G1C.7	antisense	intron
chrI	10076129	A	B0379.1	sense	intron
chrI	100762	A	Y48G1C.7	antisense	intron
chrI	10087843	A	scpl-1	antisense	coding
chrI	1009987	A	C54G6.2	sense	intron
chrI	1012101	A	C54G6.1	antisense	intron
chrI	1012119	T	C54G6.1	antisense	intron
chrI	1012130	T	C54G6.1	antisense	intron
chrI	1012714	A	C54G6.1	antisense	intron
chrI	1012749	A	C54G6.1	antisense	intron
chrI	1012959	A	C54G6.1	antisense	intron
chrI	1012994	A	C54G6.1	antisense	intron
chrI	1013029	A	C54G6.1	antisense	intron
chrI	10137467	A	ND	NA	intergenic
chrI	10141160	A	ND	NA	intergenic
chrI	10142085	T	ND	NA	intergenic
chrI	10142101	A	ND	NA	intergenic
chrI	1014843	A	ND	NA	intergenic
chrI	10150393	A	F16C3.2	antisense	coding
chrI	10159700	T	F16C3.4	sense	intron
chrI	10166854	T	ND	NA	intergenic
chrI	10166860	T	ND	NA	intergenic
chrI	10178918	T	ND	NA	intergenic
chrI	10184003	A	ND	NA	intergenic
chrI	10184017	A	ND	NA	intergenic
chrI	10184036	A	ND	NA	intergenic
chrI	10184081	A	ND	NA	intergenic
chrI	10184096	A	ND	NA	intergenic
chrI	10184269	A	clec-87	antisense	3utr
chrI	10184314	A	clec-87	antisense	3utr
chrI	10234253	T	ND	NA	intergenic
chrI	10239348	T	ND	NA	intergenic
chrI	10239350	A	ND	NA	intergenic
chrI	10239363	A	ND	NA	intergenic
chrI	10239375	A	ND	NA	intergenic
chrI	10239396	A	ND	NA	intergenic
chrI	10239408	T	ND	NA	intergenic
chrI	10241563	A	ND	NA	intergenic
chrI	10241575	T	ND	NA	intergenic
chrI	10241596	T	ND	NA	intergenic
chrI	10241608	T	ND	NA	intergenic
chrI	10241621	T	ND	NA	intergenic
chrI	10241623	A	ND	NA	intergenic
chrI	10241636	T	ND	NA	intergenic
chrI	10260135	A	ZC247.2	antisense	coding
chrI	10276869	T	ZC247.1	antisense	coding
chrI	10291461	T	T20F10.8	sense	3utr
chrI	10291474	T	T20F10.8	sense	3utr
chrI	10292357	T	wts-1	antisense	intron
chrI	10302922	A	T20F10.5	antisense	coding
chrI	10319233	T	ND	NA	intergenic
chrI	10320924	A	Y106G6G.6	antisense	coding
chrI	10326705	A	Y106G6G.2	antisense	coding
chrI	10344037	T	aph-2	sense	intron
chrI	10356391	T	ZC434.9	sense	coding
chrI	10358833	A	ZC434.9	sense	intron
chrI	10372965	A	ND	NA	intergenic
chrI	10372974	A	ND	NA	intergenic
chrI	10372979	A	ND	NA	intergenic
chrI	10382028	T	ND	NA	intergenic
chrI	10389147	T	mgl-2	antisense	coding
chrI	10439123	A	Y106G6H.5	antisense	intron
chrI	10439132	A	Y106G6H.5	antisense	coding
chrI	10439643	A	Y106G6H.5	antisense	intron
chrI	10439822	A	Y106G6H.5	antisense	intron
chrI	10441700	A	Y106G6H.5	antisense	intron
chrI	10450766	T	sec-8	sense	coding
chrI	10455769	T	ND	NA	intergenic
chrI	10455770	T	ND	NA	intergenic
chrI	10455848	T	ND	NA	intergenic
chrI	10455902	T	ND	NA	intergenic
chrI	10455925	T	ND	NA	intergenic
chrI	10455941	T	ND	NA	intergenic
chrI	10456029	T	ND	NA	intergenic
chrI	10456042	T	ND	NA	intergenic
chrI	10456048	T	ND	NA	intergenic
chrI	10456054	T	ND	NA	intergenic
chrI	10456079	T	ND	NA	intergenic
chrI	10456098	T	ND	NA	intergenic
chrI	10456099	A	ND	NA	intergenic
chrI	10456107	T	ND	NA	intergenic
chrI	10456127	A	ND	NA	intergenic
chrI	10456527	A	ND	NA	intergenic
chrI	10457315	T	ND	NA	intergenic
chrI	10457335	A	ND	NA	intergenic
chrI	10457343	T	ND	NA	intergenic
chrI	10457344	A	ND	NA	intergenic
chrI	10457363	A	ND	NA	intergenic
chrI	10457388	A	ND	NA	intergenic
chrI	10457394	A	ND	NA	intergenic
chrI	10457400	A	ND	NA	intergenic
chrI	10457413	A	ND	NA	intergenic
chrI	10457501	A	ND	NA	intergenic
chrI	10457517	A	ND	NA	intergenic
chrI	10457540	A	ND	NA	intergenic
chrI	10457594	A	ND	NA	intergenic
chrI	10457672	A	ND	NA	intergenic
chrI	10457673	A	ND	NA	intergenic
chrI	10468972	A	duo-3	antisense	intron
chrI	10468981	T	duo-3	antisense	intron
chrI	10469259	T	duo-3	antisense	intron
chrI	10469290	A	duo-3	antisense	intron
chrI	10469299	T	duo-3	antisense	intron
chrI	10471796	T	Y106G6H.13	sense	coding
chrI	10479583	A	mus-101	antisense	coding
chrI	104828	T	Y48G1C.8	antisense	intron
chrI	10484193	T	mus-101	antisense	intron
chrI	10484693	A	mus-101	antisense	intron
chrI	10485584	T	ND	NA	intergenic
chrI	10485585	A	ND	NA	intergenic
chrI	10485600	T	ND	NA	intergenic
chrI	10485624	T	ND	NA	intergenic
chrI	10485625	T	ND	NA	intergenic
chrI	10485776	A	ND	NA	intergenic
chrI	10485791	A	ND	NA	intergenic
chrI	104867	T	Y48G1C.8	antisense	intron
chrI	105130	T	Y48G1C.8	antisense	intron
chrI	10515424	A	che-13	antisense	coding
chrI	1051818	A	Y34D9A.8	antisense	intron
chrI	1051836	T	Y34D9A.8	antisense	intron
chrI	1052030	T	Y34D9A.8	antisense	intron
chrI	10521582	A	F59C6.12	sense	intron
chrI	10523671	T	F59C6.2	sense	coding
chrI	10528243	A	F59C6.14	sense	intron
chrI	10528256	T	F59C6.14	sense	intron
chrI	10528264	T	F59C6.14	sense	intron
chrI	10529603	T	F59C6.14	sense	intron
chrI	10529756	A	F59C6.14	sense	intron
chrI	10529804	A	F59C6.14	sense	intron
chrI	10529812	A	F59C6.14	sense	intron
chrI	10532404	T	ND	NA	intergenic
chrI	10550543	A	ND	NA	intergenic
chrI	10550553	A	ND	NA	intergenic
chrI	10550580	A	ND	NA	intergenic
chrI	10550584	A	ND	NA	intergenic
chrI	10550585	A	ND	NA	intergenic
chrI	10550615	A	ND	NA	intergenic
chrI	10550619	A	ND	NA	intergenic
chrI	10550620	A	ND	NA	intergenic
chrI	10550652	A	ND	NA	intergenic
chrI	10550735	A	ND	NA	intergenic
chrI	10550736	A	ND	NA	intergenic
chrI	10550779	A	ND	NA	intergenic
chrI	10550796	A	ND	NA	intergenic
chrI	10550800	A	ND	NA	intergenic
chrI	10550801	A	ND	NA	intergenic
chrI	10550812	A	ND	NA	intergenic
chrI	10550831	A	ND	NA	intergenic
chrI	10550835	A	ND	NA	intergenic
chrI	10551099	A	ND	NA	intergenic
chrI	10553021	T	F25H2.4	sense	3utr
chrI	10561768	T	ND	NA	intergenic
chrI	10561774	T	ND	NA	intergenic
chrI	10561781	T	ND	NA	intergenic
chrI	1056584	A	vps-4	antisense	intron
chrI	1058037	A	vps-4	antisense	intron
chrI	1058084	T	vps-4	antisense	intron
chrI	1058085	A	vps-4	antisense	intron
chrI	1058116	T	vps-4	antisense	intron
chrI	1058164	T	vps-4	antisense	intron
chrI	1058176	A	vps-4	antisense	intron
chrI	1058186	A	vps-4	antisense	intron
chrI	1058198	A	vps-4	antisense	intron
chrI	1058204	A	vps-4	antisense	intron
chrI	1058219	A	vps-4	antisense	intron
chrI	1058220	A	vps-4	antisense	intron
chrI	1058298	T	vps-4	antisense	intron
chrI	1058317	T	vps-4	antisense	intron
chrI	1058322	T	vps-4	antisense	intron
chrI	1058330	A	vps-4	antisense	intron
chrI	1058345	T	vps-4	antisense	intron
chrI	1058548	T	vps-4	antisense	intron
chrI	1058558	T	vps-4	antisense	intron
chrI	1058565	T	vps-4	antisense	intron
chrI	1058575	T	vps-4	antisense	intron
chrI	1058588	T	vps-4	antisense	intron
chrI	1058589	T	vps-4	antisense	intron
chrI	1058590	T	vps-4	antisense	intron
chrI	1058613	T	vps-4	antisense	intron
chrI	1058637	T	vps-4	antisense	intron
chrI	1058638	T	vps-4	antisense	intron
chrI	1058641	A	vps-4	antisense	intron
chrI	1058643	T	vps-4	antisense	intron
chrI	1058644	A	vps-4	antisense	intron
chrI	1058651	A	vps-4	antisense	intron
chrI	1058666	T	vps-4	antisense	intron
chrI	1058667	T	vps-4	antisense	intron
chrI	1058671	T	vps-4	antisense	intron
chrI	1058674	A	vps-4	antisense	intron
chrI	1058683	A	vps-4	antisense	intron
chrI	1058691	T	vps-4	antisense	intron
chrI	10594067	T	ND	NA	intergenic
chrI	10594078	T	ND	NA	intergenic
chrI	10594080	A	ND	NA	intergenic
chrI	10594086	A	ND	NA	intergenic
chrI	10594120	A	ND	NA	intergenic
chrI	10594313	A	ND	NA	intergenic
chrI	10594324	A	ND	NA	intergenic
chrI	10594325	A	ND	NA	intergenic
chrI	10604443	A	pash-1	sense	intron
chrI	10604444	A	pash-1	sense	intron
chrI	1061401	T	vps-4	antisense	intron
chrI	10630926	T	cutl-14	sense	coding
chrI	10639322	T	cdc-26	antisense	3utr
chrI	10671232	T	ND	NA	intergenic
chrI	10678250	A	C34B2.6	antisense	intron
chrI	10678261	T	C34B2.6	antisense	intron
chrI	10678267	A	C34B2.6	antisense	intron
chrI	10678293	A	C34B2.6	antisense	intron
chrI	10701573	A	C34B2.9	antisense	intron
chrI	10715857	T	B0205.1	antisense	intron
chrI	10720615	A	ND	NA	intergenic
chrI	10728894	A	B0205.8	antisense	3utr
chrI	10731921	T	rpn-10	antisense	intron
chrI	1076666	A	ND	NA	intergenic
chrI	10774429	A	daf-16	sense	intron
chrI	10774613	A	daf-16	sense	intron
chrI	10774626	A	daf-16	sense	intron
chrI	10774627	A	daf-16	sense	intron
chrI	10778675	T	ND	NA	intergenic
chrI	10778688	T	ND	NA	intergenic
chrI	10778706	T	ND	NA	intergenic
chrI	10778765	T	ND	NA	intergenic
chrI	10778767	T	ND	NA	intergenic
chrI	10778793	T	ND	NA	intergenic
chrI	10778799	T	ND	NA	intergenic
chrI	10778813	T	ND	NA	intergenic
chrI	10778908	T	ND	NA	intergenic
chrI	10778913	T	ND	NA	intergenic
chrI	10778947	T	ND	NA	intergenic
chrI	10778948	T	ND	NA	intergenic
chrI	10778990	T	ND	NA	intergenic
chrI	10779167	T	ND	NA	intergenic
chrI	10779194	T	ND	NA	intergenic
chrI	10779201	T	ND	NA	intergenic
chrI	10779373	T	ND	NA	intergenic
chrI	10779389	T	ND	NA	intergenic
chrI	10779390	T	ND	NA	intergenic
chrI	10779903	T	ND	NA	intergenic
chrI	10779953	T	ND	NA	intergenic
chrI	10779962	T	ND	NA	intergenic
chrI	10780072	T	ND	NA	intergenic
chrI	10780124	T	ND	NA	intergenic
chrI	10781145	T	ND	NA	intergenic
chrI	10781163	T	ND	NA	intergenic
chrI	10781417	T	ND	NA	intergenic
chrI	10781667	T	ND	NA	intergenic
chrI	10781668	T	ND	NA	intergenic
chrI	10781741	T	ND	NA	intergenic
chrI	10781758	T	ND	NA	intergenic
chrI	10781817	T	ND	NA	intergenic
chrI	10781823	T	ND	NA	intergenic
chrI	10782279	A	F55A3.5	antisense	coding
chrI	10785864	T	F55A3.7	antisense	intron
chrI	10793508	T	F55A3.2	sense	5utr
chrI	10809306	T	C35E7.8	sense	intron
chrI	10819184	A	ND	NA	intergenic
chrI	10819188	A	ND	NA	intergenic
chrI	10819194	T	ND	NA	intergenic
chrI	10819196	A	ND	NA	intergenic
chrI	10819198	A	ND	NA	intergenic
chrI	10819211	A	ND	NA	intergenic
chrI	10819221	A	ND	NA	intergenic
chrI	10819224	A	ND	NA	intergenic
chrI	10819260	T	ND	NA	intergenic
chrI	10819268	A	ND	NA	intergenic
chrI	10819276	A	ND	NA	intergenic
chrI	10819296	A	ND	NA	intergenic
chrI	10819298	A	ND	NA	intergenic
chrI	10819302	T	ND	NA	intergenic
chrI	10819303	A	ND	NA	intergenic
chrI	10819315	T	ND	NA	intergenic
chrI	10819341	A	ND	NA	intergenic
chrI	10819343	A	ND	NA	intergenic
chrI	10819344	A	ND	NA	intergenic
chrI	10819350	A	ND	NA	intergenic
chrI	10819354	A	ND	NA	intergenic
chrI	10819374	A	ND	NA	intergenic
chrI	10819407	A	ND	NA	intergenic
chrI	10819419	A	ND	NA	intergenic
chrI	10819442	A	ND	NA	intergenic
chrI	10819443	A	ND	NA	intergenic
chrI	10819453	A	ND	NA	intergenic
chrI	10819462	A	ND	NA	intergenic
chrI	10819465	T	ND	NA	intergenic
chrI	10819469	A	ND	NA	intergenic
chrI	10819473	A	ND	NA	intergenic
chrI	10819485	A	ND	NA	intergenic
chrI	10819508	A	ND	NA	intergenic
chrI	10819533	A	ND	NA	intergenic
chrI	10819544	A	ND	NA	intergenic
chrI	10819554	A	ND	NA	intergenic
chrI	10819569	A	ND	NA	intergenic
chrI	10819573	A	ND	NA	intergenic
chrI	10819575	A	ND	NA	intergenic
chrI	10819585	A	ND	NA	intergenic
chrI	10819622	A	ND	NA	intergenic
chrI	10819625	A	ND	NA	intergenic
chrI	10819672	A	ND	NA	intergenic
chrI	10819682	A	ND	NA	intergenic
chrI	10819686	A	ND	NA	intergenic
chrI	10819687	A	ND	NA	intergenic
chrI	10819710	A	ND	NA	intergenic
chrI	10819717	A	ND	NA	intergenic
chrI	10819721	A	ND	NA	intergenic
chrI	10819726	A	ND	NA	intergenic
chrI	10819749	A	ND	NA	intergenic
chrI	10819759	A	ND	NA	intergenic
chrI	10819885	A	ND	NA	intergenic
chrI	10819900	A	ND	NA	intergenic
chrI	10819911	A	ND	NA	intergenic
chrI	10819987	A	ND	NA	intergenic
chrI	10819997	A	ND	NA	intergenic
chrI	10820001	A	ND	NA	intergenic
chrI	10820026	A	ND	NA	intergenic
chrI	10820039	A	ND	NA	intergenic
chrI	10820099	T	ND	NA	intergenic
chrI	10820103	A	ND	NA	intergenic
chrI	10820126	A	ND	NA	intergenic
chrI	10820127	A	ND	NA	intergenic
chrI	10820133	A	ND	NA	intergenic
chrI	10820140	A	ND	NA	intergenic
chrI	10820158	A	ND	NA	intergenic
chrI	10820170	A	ND	NA	intergenic
chrI	10820171	A	ND	NA	intergenic
chrI	10820180	A	ND	NA	intergenic
chrI	10820181	A	ND	NA	intergenic
chrI	10820196	T	ND	NA	intergenic
chrI	10820198	A	ND	NA	intergenic
chrI	10820204	A	ND	NA	intergenic
chrI	10820264	A	ND	NA	intergenic
chrI	10820275	A	ND	NA	intergenic
chrI	10820276	A	ND	NA	intergenic
chrI	10820281	A	ND	NA	intergenic
chrI	10820295	A	ND	NA	intergenic
chrI	10820302	A	ND	NA	intergenic
chrI	10820304	A	ND	NA	intergenic
chrI	10820349	T	ND	NA	intergenic
chrI	10820350	A	ND	NA	intergenic
chrI	10820353	A	ND	NA	intergenic
chrI	10820365	T	ND	NA	intergenic
chrI	10820366	A	ND	NA	intergenic
chrI	10820370	T	ND	NA	intergenic
chrI	10820371	T	ND	NA	intergenic
chrI	10820372	T	ND	NA	intergenic
chrI	10820380	T	ND	NA	intergenic
chrI	10820392	T	ND	NA	intergenic
chrI	10820400	T	ND	NA	intergenic
chrI	10820401	A	ND	NA	intergenic
chrI	10820402	A	ND	NA	intergenic
chrI	10820416	A	ND	NA	intergenic
chrI	10820442	A	ND	NA	intergenic
chrI	10820451	A	ND	NA	intergenic
chrI	10820462	A	ND	NA	intergenic
chrI	10820465	A	ND	NA	intergenic
chrI	10820488	A	ND	NA	intergenic
chrI	10820499	A	ND	NA	intergenic
chrI	10820507	A	ND	NA	intergenic
chrI	10820508	A	ND	NA	intergenic
chrI	10821323	T	ND	NA	intergenic
chrI	10821328	T	ND	NA	intergenic
chrI	1082163	A	ND	NA	intergenic
chrI	1086176	T	R06A10.1	sense	coding
chrI	10865041	A	ND	NA	intergenic
chrI	10871417	A	Y37F4.6	antisense	intron
chrI	10871418	A	Y37F4.6	antisense	intron
chrI	10871426	A	Y37F4.6	antisense	intron
chrI	10871433	A	Y37F4.6	antisense	intron
chrI	10871436	T	Y37F4.6	antisense	intron
chrI	10871441	T	Y37F4.6	antisense	intron
chrI	10871444	T	Y37F4.6	antisense	intron
chrI	10871451	T	Y37F4.6	antisense	intron
chrI	10871465	T	Y37F4.6	antisense	intron
chrI	10872225	A	Y37F4.6	antisense	intron
chrI	10872232	T	Y37F4.6	antisense	intron
chrI	10872575	T	Y37F4.6	antisense	intron
chrI	10872581	T	Y37F4.6	antisense	intron
chrI	10872582	T	Y37F4.6	antisense	intron
chrI	10872602	T	Y37F4.6	antisense	intron
chrI	10872607	T	Y37F4.6	antisense	intron
chrI	10872615	T	Y37F4.6	antisense	intron
chrI	10872617	A	Y37F4.6	antisense	intron
chrI	10872624	T	Y37F4.6	antisense	intron
chrI	10872628	T	Y37F4.6	antisense	intron
chrI	10872629	T	Y37F4.6	antisense	intron
chrI	10872630	A	Y37F4.6	antisense	intron
chrI	10872636	T	Y37F4.6	antisense	intron
chrI	10872756	A	Y37F4.6	antisense	intron
chrI	10872759	A	Y37F4.6	antisense	intron
chrI	10872779	T	Y37F4.6	antisense	intron
chrI	10872784	A	Y37F4.6	antisense	intron
chrI	10872801	A	Y37F4.6	antisense	intron
chrI	10872856	T	Y37F4.6	antisense	intron
chrI	10872863	A	Y37F4.6	antisense	intron
chrI	10872865	A	Y37F4.6	antisense	intron
chrI	10872921	A	Y37F4.6	antisense	intron
chrI	10872924	A	Y37F4.6	antisense	intron
chrI	10872948	T	Y37F4.6	antisense	intron
chrI	10889807	A	lrk-1	antisense	intron
chrI	10889812	A	lrk-1	antisense	intron
chrI	10889822	A	lrk-1	antisense	intron
chrI	10889825	A	lrk-1	antisense	intron
chrI	10939153	A	prp-17	sense	intron
chrI	10939175	A	prp-17	sense	intron
chrI	10939176	A	prp-17	sense	intron
chrI	10939364	A	prp-17	sense	intron
chrI	10939369	A	prp-17	sense	intron
chrI	10939385	A	prp-17	sense	intron
chrI	10939389	T	prp-17	sense	intron
chrI	10939390	A	prp-17	sense	intron
chrI	10939400	A	prp-17	sense	intron
chrI	10944756	A	Y95D11A.1	sense	intron
chrI	10944995	A	Y95D11A.1	sense	intron
chrI	10945109	A	Y95D11A.1	sense	intron
chrI	10945120	A	Y95D11A.1	sense	intron
chrI	10955698	A	ND	NA	intergenic
chrI	10955730	T	ND	NA	intergenic
chrI	10955731	A	ND	NA	intergenic
chrI	10955732	A	ND	NA	intergenic
chrI	10955734	T	ND	NA	intergenic
chrI	10955743	T	ND	NA	intergenic
chrI	10955781	A	ND	NA	intergenic
chrI	10955789	T	ND	NA	intergenic
chrI	10955814	A	ND	NA	intergenic
chrI	10955854	A	ND	NA	intergenic
chrI	10955862	A	ND	NA	intergenic
chrI	10955873	A	ND	NA	intergenic
chrI	10955888	T	ND	NA	intergenic
chrI	10955890	A	ND	NA	intergenic
chrI	10955897	A	ND	NA	intergenic
chrI	10955898	A	ND	NA	intergenic
chrI	10955902	A	ND	NA	intergenic
chrI	10955923	T	ND	NA	intergenic
chrI	10956362	T	ND	NA	intergenic
chrI	10956379	T	ND	NA	intergenic
chrI	10956390	T	ND	NA	intergenic
chrI	10956398	T	ND	NA	intergenic
chrI	10956411	A	ND	NA	intergenic
chrI	10956507	A	ND	NA	intergenic
chrI	10956516	A	ND	NA	intergenic
chrI	10956518	T	ND	NA	intergenic
chrI	10956519	T	ND	NA	intergenic
chrI	10956520	A	ND	NA	intergenic
chrI	10956543	T	ND	NA	intergenic
chrI	10956552	T	ND	NA	intergenic
chrI	10960701	T	ND	NA	intergenic
chrI	10966406	A	Y52B11A.2	antisense	3utr
chrI	10968335	T	Y52B11A.2	antisense	intron
chrI	11011968	A	Y52B11A.13	antisense	5utr
chrI	11012190	T	Y52B11A.13	antisense	5utr
chrI	11012361	T	Y52B11A.13	antisense	5utr
chrI	11012446	T	Y52B11A.13	antisense	5utr
chrI	11012755	T	Y52B11A.13	antisense	5utr
chrI	11012798	T	Y52B11A.13	antisense	5utr
chrI	1101300	T	ND	NA	intergenic
chrI	11013088	T	Y52B11A.12	sense	3utr
chrI	11013096	T	Y52B11A.12	sense	3utr
chrI	1101325	T	ND	NA	intergenic
chrI	1101326	T	ND	NA	intergenic
chrI	11013363	A	Y52B11A.12	sense	3utr
chrI	11014920	T	ND	NA	intergenic
chrI	11014959	A	ND	NA	intergenic
chrI	11015090	T	ND	NA	intergenic
chrI	11015091	T	ND	NA	intergenic
chrI	11015092	A	ND	NA	intergenic
chrI	11015093	A	ND	NA	intergenic
chrI	11015097	T	ND	NA	intergenic
chrI	11015099	A	ND	NA	intergenic
chrI	11015110	T	ND	NA	intergenic
chrI	11030927	T	ND	NA	intergenic
chrI	11030928	T	ND	NA	intergenic
chrI	11030929	T	ND	NA	intergenic
chrI	11030934	T	ND	NA	intergenic
chrI	11030944	A	ND	NA	intergenic
chrI	11043517	T	Y52B11A.10	sense	coding
chrI	11056638	A	ND	NA	intergenic
chrI	11056649	A	ND	NA	intergenic
chrI	11057293	T	ND	NA	intergenic
chrI	11061586	A	ND	NA	intergenic
chrI	11079844	A	hmr-1	antisense	intron
chrI	11108359	A	hmr-1	antisense	intron
chrI	11108970	T	hmr-1	antisense	intron
chrI	11109082	A	hmr-1	antisense	intron
chrI	11116449	A	hmr-1	antisense	intron
chrI	11116504	A	hmr-1	antisense	intron
chrI	11116515	A	hmr-1	antisense	intron
chrI	11116554	A	hmr-1	antisense	intron
chrI	11116555	A	hmr-1	antisense	intron
chrI	11116592	A	hmr-1	antisense	intron
chrI	11116593	A	hmr-1	antisense	intron
chrI	11116598	A	hmr-1	antisense	intron
chrI	11116617	A	hmr-1	antisense	intron
chrI	11116904	T	hmr-1	antisense	intron
chrI	11116909	T	hmr-1	antisense	intron
chrI	11116910	T	hmr-1	antisense	intron
chrI	11116948	T	hmr-1	antisense	intron
chrI	11116969	T	hmr-1	antisense	intron
chrI	11142313	T	clec-93	sense	intron
chrI	11142322	A	clec-93	sense	intron
chrI	11142323	A	clec-93	sense	intron
chrI	11142330	T	clec-93	sense	intron
chrI	11142333	A	clec-93	sense	intron
chrI	11142341	A	clec-93	sense	intron
chrI	11142346	T	clec-93	sense	intron
chrI	11142347	A	clec-93	sense	intron
chrI	11142353	T	clec-93	sense	intron
chrI	11142354	T	clec-93	sense	intron
chrI	11142369	T	clec-93	sense	intron
chrI	11142370	A	clec-93	sense	intron
chrI	11142408	T	clec-93	sense	intron
chrI	11142419	T	clec-93	sense	intron
chrI	11142428	T	clec-93	sense	intron
chrI	11142438	T	clec-93	sense	intron
chrI	11142439	T	clec-93	sense	intron
chrI	11142440	T	clec-93	sense	intron
chrI	11142443	T	clec-93	sense	intron
chrI	11142455	T	clec-93	sense	intron
chrI	11142456	T	clec-93	sense	intron
chrI	11142475	T	clec-93	sense	intron
chrI	11142519	A	clec-93	sense	intron
chrI	11142532	A	clec-93	sense	intron
chrI	11142533	A	clec-93	sense	intron
chrI	11142534	A	clec-93	sense	intron
chrI	11142538	T	clec-93	sense	intron
chrI	11142539	A	clec-93	sense	intron
chrI	11142546	A	clec-93	sense	intron
chrI	11142554	T	clec-93	sense	intron
chrI	11142562	T	clec-93	sense	intron
chrI	11142564	A	clec-93	sense	intron
chrI	11142566	A	clec-93	sense	intron
chrI	11142570	A	clec-93	sense	intron
chrI	11142612	A	clec-93	sense	intron
chrI	11142626	A	clec-93	sense	intron
chrI	11142629	T	clec-93	sense	intron
chrI	11142632	A	clec-93	sense	intron
chrI	11142636	T	clec-93	sense	intron
chrI	11142639	T	clec-93	sense	intron
chrI	11142661	A	clec-93	sense	intron
chrI	11142663	T	clec-93	sense	intron
chrI	11142664	T	clec-93	sense	intron
chrI	11142666	A	clec-93	sense	intron
chrI	11142667	A	clec-93	sense	intron
chrI	11142668	A	clec-93	sense	intron
chrI	11142670	T	clec-93	sense	intron
chrI	11142675	A	clec-93	sense	intron
chrI	11142681	A	clec-93	sense	intron
chrI	11142682	T	clec-93	sense	intron
chrI	11142684	A	clec-93	sense	intron
chrI	11142692	A	clec-93	sense	intron
chrI	11142694	A	clec-93	sense	intron
chrI	11142703	A	clec-93	sense	intron
chrI	11142715	A	clec-93	sense	intron
chrI	11142716	T	clec-93	sense	intron
chrI	11142717	T	clec-93	sense	intron
chrI	11142722	A	clec-93	sense	intron
chrI	11142723	A	clec-93	sense	intron
chrI	11142726	A	clec-93	sense	intron
chrI	11142731	T	clec-93	sense	intron
chrI	11142746	T	clec-93	sense	intron
chrI	11142747	T	clec-93	sense	intron
chrI	11142752	T	clec-93	sense	intron
chrI	11142794	T	clec-93	sense	intron
chrI	11142795	T	clec-93	sense	intron
chrI	11142798	A	clec-93	sense	intron
chrI	11142806	T	clec-93	sense	intron
chrI	11142807	T	clec-93	sense	intron
chrI	11142814	A	clec-93	sense	intron
chrI	11142819	A	clec-93	sense	intron
chrI	11142835	T	clec-93	sense	intron
chrI	11142874	A	clec-93	sense	intron
chrI	11142880	A	clec-93	sense	intron
chrI	11142883	T	clec-93	sense	intron
chrI	11142884	T	clec-93	sense	intron
chrI	11142885	A	clec-93	sense	intron
chrI	11142886	A	clec-93	sense	intron
chrI	11142889	A	clec-93	sense	intron
chrI	11142891	A	clec-93	sense	intron
chrI	11142900	T	clec-93	sense	intron
chrI	11142901	T	clec-93	sense	intron
chrI	11142902	A	clec-93	sense	intron
chrI	11142903	A	clec-93	sense	intron
chrI	11142907	A	clec-93	sense	intron
chrI	11142915	T	clec-93	sense	intron
chrI	11142919	T	clec-93	sense	intron
chrI	11142920	T	clec-93	sense	intron
chrI	11142937	A	clec-93	sense	intron
chrI	11142945	T	clec-93	sense	intron
chrI	11143001	T	clec-93	sense	intron
chrI	11143008	T	clec-93	sense	intron
chrI	11143020	T	clec-93	sense	intron
chrI	11143022	T	clec-93	sense	intron
chrI	11143130	A	clec-93	sense	intron
chrI	11143134	T	clec-93	sense	intron
chrI	11143139	T	clec-93	sense	intron
chrI	11143140	T	clec-93	sense	intron
chrI	11143142	A	clec-93	sense	intron
chrI	11143149	A	clec-93	sense	intron
chrI	11143156	A	clec-93	sense	intron
chrI	11143157	A	clec-93	sense	intron
chrI	11143163	A	clec-93	sense	intron
chrI	11143165	T	clec-93	sense	intron
chrI	11143173	A	clec-93	sense	intron
chrI	11143175	T	clec-93	sense	intron
chrI	11143176	T	clec-93	sense	intron
chrI	11143177	A	clec-93	sense	intron
chrI	11143184	T	clec-93	sense	intron
chrI	11143188	T	clec-93	sense	intron
chrI	11143195	A	clec-93	sense	intron
chrI	11143198	A	clec-93	sense	intron
chrI	11143205	A	clec-93	sense	intron
chrI	11143213	T	clec-93	sense	intron
chrI	11157683	T	clec-99	antisense	intron
chrI	11165014	A	Y52B11C.1	antisense	intron
chrI	11165026	T	Y52B11C.1	antisense	intron
chrI	11165047	T	Y52B11C.1	antisense	intron
chrI	11165056	A	Y52B11C.1	antisense	intron
chrI	11165620	T	Y52B11C.1	antisense	intron
chrI	11165621	T	Y52B11C.1	antisense	intron
chrI	11165689	T	Y52B11C.1	antisense	intron
chrI	11165724	A	Y52B11C.1	antisense	intron
chrI	11165727	T	Y52B11C.1	antisense	intron
chrI	11165729	A	Y52B11C.1	antisense	intron
chrI	11165734	T	Y52B11C.1	antisense	intron
chrI	11165735	T	Y52B11C.1	antisense	intron
chrI	11165736	A	Y52B11C.1	antisense	intron
chrI	11165744	A	Y52B11C.1	antisense	intron
chrI	11165747	A	Y52B11C.1	antisense	intron
chrI	11165748	A	Y52B11C.1	antisense	intron
chrI	11165749	A	Y52B11C.1	antisense	intron
chrI	11165754	A	Y52B11C.1	antisense	intron
chrI	11165758	T	Y52B11C.1	antisense	intron
chrI	11165786	T	Y52B11C.1	antisense	intron
chrI	11165803	T	Y52B11C.1	antisense	intron
chrI	11165812	T	Y52B11C.1	antisense	intron
chrI	11165813	A	Y52B11C.1	antisense	intron
chrI	11165814	A	Y52B11C.1	antisense	intron
chrI	11165824	T	Y52B11C.1	antisense	intron
chrI	11165834	T	Y52B11C.1	antisense	intron
chrI	11165835	T	Y52B11C.1	antisense	intron
chrI	11165837	A	Y52B11C.1	antisense	intron
chrI	11165847	A	Y52B11C.1	antisense	intron
chrI	11165849	T	Y52B11C.1	antisense	intron
chrI	11165850	T	Y52B11C.1	antisense	intron
chrI	11165859	T	Y52B11C.1	antisense	intron
chrI	11165918	T	Y52B11C.1	antisense	intron
chrI	11165931	A	Y52B11C.1	antisense	intron
chrI	11165940	A	Y52B11C.1	antisense	intron
chrI	11165956	T	Y52B11C.1	antisense	intron
chrI	11165999	T	Y52B11C.1	antisense	intron
chrI	11166000	A	Y52B11C.1	antisense	intron
chrI	11166001	T	Y52B11C.1	antisense	intron
chrI	11166008	A	Y52B11C.1	antisense	intron
chrI	11166009	A	Y52B11C.1	antisense	intron
chrI	11166017	T	Y52B11C.1	antisense	intron
chrI	11166019	T	Y52B11C.1	antisense	intron
chrI	11166021	A	Y52B11C.1	antisense	intron
chrI	11166038	T	Y52B11C.1	antisense	intron
chrI	11166063	T	Y52B11C.1	antisense	intron
chrI	11166072	T	Y52B11C.1	antisense	intron
chrI	11166086	A	Y52B11C.1	antisense	intron
chrI	11166097	A	Y52B11C.1	antisense	intron
chrI	11166098	A	Y52B11C.1	antisense	intron
chrI	11166099	A	Y52B11C.1	antisense	intron
chrI	11166108	T	Y52B11C.1	antisense	intron
chrI	11166109	T	Y52B11C.1	antisense	intron
chrI	11166112	T	Y52B11C.1	antisense	intron
chrI	11166122	A	Y52B11C.1	antisense	intron
chrI	11166123	A	Y52B11C.1	antisense	intron
chrI	11166151	T	Y52B11C.1	antisense	intron
chrI	1117846	T	ND	NA	intergenic
chrI	1118308	T	ND	NA	intergenic
chrI	11184016	T	sri-5	sense	intron
chrI	1118617	T	ND	NA	intergenic
chrI	1119041	A	ND	NA	intergenic
chrI	1119079	A	ND	NA	intergenic
chrI	1119096	A	ND	NA	intergenic
chrI	1119163	T	ND	NA	intergenic
chrI	1119221	A	ND	NA	intergenic
chrI	1119504	A	ND	NA	intergenic
chrI	1119845	T	ND	NA	intergenic
chrI	1119903	A	ND	NA	intergenic
chrI	1119970	T	ND	NA	intergenic
chrI	1119987	T	ND	NA	intergenic
chrI	1120025	T	ND	NA	intergenic
chrI	1120449	A	ND	NA	intergenic
chrI	1120758	A	ND	NA	intergenic
chrI	11211145	A	ztf-6	sense	intron
chrI	1121220	A	ND	NA	intergenic
chrI	11212353	A	ND	NA	intergenic
chrI	11213943	A	ins-36	antisense	intron
chrI	11215397	T	ND	NA	intergenic
chrI	11215409	A	ND	NA	intergenic
chrI	11215410	A	ND	NA	intergenic
chrI	11215421	A	ND	NA	intergenic
chrI	11215422	A	ND	NA	intergenic
chrI	11215434	T	ND	NA	intergenic
chrI	11215440	T	ND	NA	intergenic
chrI	11215441	A	ND	NA	intergenic
chrI	11215512	T	ND	NA	intergenic
chrI	11215513	A	ND	NA	intergenic
chrI	11215519	A	ND	NA	intergenic
chrI	11215531	T	ND	NA	intergenic
chrI	11215543	T	ND	NA	intergenic
chrI	11215556	A	ND	NA	intergenic
chrI	11224315	A	ND	NA	intergenic
chrI	11224753	A	ND	NA	intergenic
chrI	11224761	A	ND	NA	intergenic
chrI	11225883	A	nfya-2	sense	intron
chrI	11225954	A	nfya-2	sense	intron
chrI	11226819	A	nfya-2	sense	intron
chrI	11226825	A	nfya-2	sense	intron
chrI	11226829	A	nfya-2	sense	intron
chrI	11226838	A	nfya-2	sense	intron
chrI	11226897	A	nfya-2	sense	intron
chrI	11226898	A	nfya-2	sense	intron
chrI	11226911	A	nfya-2	sense	intron
chrI	11227639	A	nfya-2	sense	intron
chrI	11227693	A	nfya-2	sense	intron
chrI	11227694	A	nfya-2	sense	intron
chrI	11227699	A	nfya-2	sense	intron
chrI	11227707	A	nfya-2	sense	intron
chrI	11227825	A	nfya-2	sense	intron
chrI	11227846	A	nfya-2	sense	intron
chrI	11227905	A	nfya-2	sense	intron
chrI	11227915	A	nfya-2	sense	intron
chrI	11227920	A	nfya-2	sense	intron
chrI	11227981	T	nfya-2	sense	intron
chrI	11227994	T	nfya-2	sense	intron
chrI	11228007	A	nfya-2	sense	intron
chrI	11228008	A	nfya-2	sense	intron
chrI	11228018	A	nfya-2	sense	intron
chrI	11228025	A	nfya-2	sense	intron
chrI	11228030	A	nfya-2	sense	intron
chrI	11228035	A	nfya-2	sense	intron
chrI	11228114	A	nfya-2	sense	intron
chrI	11228115	A	nfya-2	sense	intron
chrI	11228130	A	nfya-2	sense	intron
chrI	11228276	T	nfya-2	sense	intron
chrI	11228298	A	nfya-2	sense	intron
chrI	11229177	A	nfya-2	sense	intron
chrI	11229178	A	nfya-2	sense	intron
chrI	11229266	T	nfya-2	sense	intron
chrI	11229285	A	nfya-2	sense	intron
chrI	11229286	A	nfya-2	sense	intron
chrI	11229301	A	nfya-2	sense	intron
chrI	11229309	T	nfya-2	sense	intron
chrI	11229342	T	nfya-2	sense	intron
chrI	11229347	T	nfya-2	sense	intron
chrI	11229358	A	nfya-2	sense	intron
chrI	11229389	A	nfya-2	sense	intron
chrI	11229418	T	nfya-2	sense	intron
chrI	11229437	A	nfya-2	sense	intron
chrI	11229440	A	nfya-2	sense	intron
chrI	11229442	A	nfya-2	sense	intron
chrI	11229443	A	nfya-2	sense	intron
chrI	11229525	A	nfya-2	sense	intron
chrI	11229543	T	nfya-2	sense	intron
chrI	11229572	T	nfya-2	sense	intron
chrI	11229631	A	nfya-2	sense	intron
chrI	11229638	A	nfya-2	sense	intron
chrI	11229647	A	nfya-2	sense	intron
chrI	11229662	T	nfya-2	sense	intron
chrI	11229677	T	nfya-2	sense	intron
chrI	11229678	A	nfya-2	sense	intron
chrI	11229686	T	nfya-2	sense	intron
chrI	11229702	A	nfya-2	sense	intron
chrI	11229720	T	nfya-2	sense	intron
chrI	11229732	A	nfya-2	sense	intron
chrI	11229735	A	nfya-2	sense	intron
chrI	11229871	T	nfya-2	sense	intron
chrI	11229896	T	nfya-2	sense	intron
chrI	11229898	T	nfya-2	sense	intron
chrI	11229913	A	nfya-2	sense	intron
chrI	11229919	A	nfya-2	sense	intron
chrI	11230492	T	nfya-2	sense	intron
chrI	11230509	T	nfya-2	sense	intron
chrI	11230547	T	nfya-2	sense	intron
chrI	11230707	T	nfya-2	sense	intron
chrI	11230710	T	nfya-2	sense	intron
chrI	11230722	A	nfya-2	sense	intron
chrI	11230740	T	nfya-2	sense	intron
chrI	11230756	A	nfya-2	sense	intron
chrI	11230764	T	nfya-2	sense	intron
chrI	11230765	A	nfya-2	sense	intron
chrI	11230780	A	nfya-2	sense	intron
chrI	11230795	T	nfya-2	sense	intron
chrI	11230804	T	nfya-2	sense	intron
chrI	11230811	T	nfya-2	sense	intron
chrI	11230870	A	nfya-2	sense	intron
chrI	11230899	A	nfya-2	sense	intron
chrI	11230917	T	nfya-2	sense	intron
chrI	11230999	T	nfya-2	sense	intron
chrI	11231000	T	nfya-2	sense	intron
chrI	11231002	T	nfya-2	sense	intron
chrI	11231005	T	nfya-2	sense	intron
chrI	11231024	A	nfya-2	sense	intron
chrI	11231053	T	nfya-2	sense	intron
chrI	11231084	T	nfya-2	sense	intron
chrI	11231095	A	nfya-2	sense	intron
chrI	11231100	A	nfya-2	sense	intron
chrI	11231133	A	nfya-2	sense	intron
chrI	11231141	T	nfya-2	sense	intron
chrI	11231156	T	nfya-2	sense	intron
chrI	11231157	T	nfya-2	sense	intron
chrI	11231176	A	nfya-2	sense	intron
chrI	11231264	T	nfya-2	sense	intron
chrI	11231265	T	nfya-2	sense	intron
chrI	11231399	A	nfya-2	sense	intron
chrI	11231405	A	nfya-2	sense	intron
chrI	11231592	A	nfya-2	sense	intron
chrI	11231640	A	nfya-2	sense	intron
chrI	11231667	A	nfya-2	sense	intron
chrI	11231720	T	nfya-2	sense	intron
chrI	11231738	T	nfya-2	sense	intron
chrI	11231825	A	nfya-2	sense	intron
chrI	11231949	A	nfya-2	sense	intron
chrI	11231973	A	nfya-2	sense	intron
chrI	11231986	A	nfya-2	sense	intron
chrI	11232012	A	nfya-2	sense	intron
chrI	11232033	A	nfya-2	sense	intron
chrI	11232069	A	nfya-2	sense	intron
chrI	11232111	A	nfya-2	sense	intron
chrI	11232160	A	nfya-2	sense	intron
chrI	11232169	A	nfya-2	sense	intron
chrI	11232181	T	nfya-2	sense	intron
chrI	11232182	A	nfya-2	sense	intron
chrI	11232189	A	nfya-2	sense	intron
chrI	11232191	T	nfya-2	sense	intron
chrI	11232192	T	nfya-2	sense	intron
chrI	11232201	T	nfya-2	sense	intron
chrI	11232374	A	nfya-2	sense	intron
chrI	11232375	A	nfya-2	sense	intron
chrI	11232415	A	nfya-2	sense	intron
chrI	11232426	A	nfya-2	sense	intron
chrI	11232427	A	nfya-2	sense	intron
chrI	11232437	A	nfya-2	sense	intron
chrI	11232474	A	nfya-2	sense	intron
chrI	1123819	A	ND	NA	intergenic
chrI	1123908	A	ND	NA	intergenic
chrI	11255000	T	scrm-6	sense	coding
chrI	11259815	A	ND	NA	intergenic
chrI	11300595	T	ND	NA	intergenic
chrI	11300631	T	ND	NA	intergenic
chrI	11300748	T	Y53H1B.4	sense	coding
chrI	11300749	T	Y53H1B.4	sense	coding
chrI	11301247	T	Y53H1B.4	sense	coding
chrI	11301270	A	Y53H1B.4	sense	coding
chrI	11301271	A	Y53H1B.4	sense	coding
chrI	11301388	A	Y53H1B.4	sense	intron
chrI	11301424	A	Y53H1B.4	sense	coding
chrI	11303459	T	ND	NA	intergenic
chrI	11303556	A	ND	NA	intergenic
chrI	11309767	T	H25P06.4	antisense	intron
chrI	11309864	A	H25P06.4	antisense	intron
chrI	11317712	T	H25P06.1	antisense	intron
chrI	11317731	T	H25P06.1	antisense	intron
chrI	11318979	A	H25P06.1	antisense	intron
chrI	11318998	A	H25P06.1	antisense	intron
chrI	11323576	T	cdk-9	sense	intron
chrI	113237	A	F53G12.13	sense	intron
chrI	11324973	A	cdk-9	sense	intron
chrI	11324985	T	cdk-9	sense	intron
chrI	11324988	T	cdk-9	sense	intron
chrI	11325012	A	cdk-9	sense	intron
chrI	11325018	A	cdk-9	sense	intron
chrI	11325029	A	cdk-9	sense	intron
chrI	11325056	T	cdk-9	sense	intron
chrI	11325067	A	cdk-9	sense	intron
chrI	11325081	T	cdk-9	sense	intron
chrI	11325082	T	cdk-9	sense	intron
chrI	11325089	T	cdk-9	sense	intron
chrI	11325091	A	cdk-9	sense	intron
chrI	11325092	T	cdk-9	sense	intron
chrI	11325093	A	cdk-9	sense	intron
chrI	11325103	A	cdk-9	sense	intron
chrI	11325105	T	cdk-9	sense	intron
chrI	11325119	A	cdk-9	sense	intron
chrI	11325125	T	cdk-9	sense	intron
chrI	11325126	A	cdk-9	sense	intron
chrI	11325127	A	cdk-9	sense	intron
chrI	11325132	A	cdk-9	sense	intron
chrI	11325139	A	cdk-9	sense	intron
chrI	11325143	A	cdk-9	sense	intron
chrI	11325149	T	cdk-9	sense	intron
chrI	11325150	T	cdk-9	sense	intron
chrI	11325180	A	cdk-9	sense	intron
chrI	11325225	T	cdk-9	sense	intron
chrI	11325226	T	cdk-9	sense	intron
chrI	11325254	T	cdk-9	sense	intron
chrI	11325271	T	cdk-9	sense	intron
chrI	11325280	T	cdk-9	sense	intron
chrI	11325281	A	cdk-9	sense	intron
chrI	11325282	A	cdk-9	sense	intron
chrI	11325292	T	cdk-9	sense	intron
chrI	11325303	T	cdk-9	sense	intron
chrI	11325305	A	cdk-9	sense	intron
chrI	11325314	A	cdk-9	sense	intron
chrI	11325318	T	cdk-9	sense	intron
chrI	11325327	T	cdk-9	sense	intron
chrI	11325339	T	cdk-9	sense	intron
chrI	11325385	A	cdk-9	sense	intron
chrI	11325394	A	cdk-9	sense	intron
chrI	11325411	A	cdk-9	sense	intron
chrI	11325440	A	cdk-9	sense	intron
chrI	11325454	A	cdk-9	sense	intron
chrI	11325462	A	cdk-9	sense	intron
chrI	11325463	A	cdk-9	sense	intron
chrI	11325490	A	cdk-9	sense	intron
chrI	11325509	A	cdk-9	sense	intron
chrI	11325511	A	cdk-9	sense	intron
chrI	11325513	A	cdk-9	sense	intron
chrI	11325516	A	cdk-9	sense	intron
chrI	11325540	A	cdk-9	sense	intron
chrI	11325549	A	cdk-9	sense	intron
chrI	11325550	A	cdk-9	sense	intron
chrI	11325560	A	cdk-9	sense	intron
chrI	11325576	A	cdk-9	sense	intron
chrI	11325577	A	cdk-9	sense	intron
chrI	11325598	T	cdk-9	sense	intron
chrI	11325647	T	cdk-9	sense	intron
chrI	11325653	T	cdk-9	sense	intron
chrI	11325677	A	cdk-9	sense	intron
chrI	11325680	A	cdk-9	sense	intron
chrI	11325692	T	cdk-9	sense	intron
chrI	1132962	T	ND	NA	intergenic
chrI	11335810	A	M04D5.1	sense	3utr
chrI	11337679	A	ND	NA	intergenic
chrI	11337694	A	ND	NA	intergenic
chrI	11337695	A	ND	NA	intergenic
chrI	11337704	A	ND	NA	intergenic
chrI	11337705	A	ND	NA	intergenic
chrI	11337708	T	ND	NA	intergenic
chrI	11337709	T	ND	NA	intergenic
chrI	11337843	A	ND	NA	intergenic
chrI	11337850	A	ND	NA	intergenic
chrI	11337851	A	ND	NA	intergenic
chrI	11337867	A	ND	NA	intergenic
chrI	113421	T	F53G12.13	sense	intron
chrI	113424	A	F53G12.13	sense	intron
chrI	1138365	T	Y48G8AL.9	antisense	intron
chrI	1138381	T	Y48G8AL.9	antisense	intron
chrI	1138388	T	Y48G8AL.9	antisense	intron
chrI	1138548	T	Y48G8AL.9	antisense	intron
chrI	1138549	T	Y48G8AL.9	antisense	intron
chrI	1138551	T	Y48G8AL.9	antisense	intron
chrI	1138553	T	Y48G8AL.9	antisense	intron
chrI	1138558	T	Y48G8AL.9	antisense	intron
chrI	1138567	T	Y48G8AL.9	antisense	intron
chrI	1138600	A	Y48G8AL.9	antisense	intron
chrI	1138606	A	Y48G8AL.9	antisense	intron
chrI	1138608	T	Y48G8AL.9	antisense	intron
chrI	1138616	A	Y48G8AL.9	antisense	intron
chrI	1138634	A	Y48G8AL.9	antisense	intron
chrI	11387874	A	png-1	sense	intron
chrI	11387875	A	png-1	sense	intron
chrI	1138909	A	Y48G8AL.9	antisense	intron
chrI	1138910	A	Y48G8AL.9	antisense	intron
chrI	1138911	A	Y48G8AL.9	antisense	intron
chrI	1138912	A	Y48G8AL.9	antisense	intron
chrI	1138980	T	Y48G8AL.9	antisense	intron
chrI	1138998	T	Y48G8AL.9	antisense	intron
chrI	1138999	T	Y48G8AL.9	antisense	intron
chrI	1139005	T	Y48G8AL.9	antisense	intron
chrI	1139006	A	Y48G8AL.9	antisense	intron
chrI	1139008	T	Y48G8AL.9	antisense	intron
chrI	1139009	T	Y48G8AL.9	antisense	intron
chrI	1139014	T	Y48G8AL.9	antisense	intron
chrI	1139058	T	Y48G8AL.9	antisense	intron
chrI	1139095	A	Y48G8AL.9	antisense	intron
chrI	1139127	T	Y48G8AL.9	antisense	intron
chrI	1139128	T	Y48G8AL.9	antisense	intron
chrI	1139274	T	Y48G8AL.9	antisense	intron
chrI	1139368	T	Y48G8AL.9	antisense	intron
chrI	1139668	A	Y48G8AL.9	antisense	intron
chrI	1139686	A	Y48G8AL.9	antisense	intron
chrI	1139869	A	Y48G8AL.9	antisense	intron
chrI	1139871	A	Y48G8AL.9	antisense	intron
chrI	1139875	A	Y48G8AL.9	antisense	intron
chrI	1139899	T	Y48G8AL.9	antisense	intron
chrI	1139900	T	Y48G8AL.9	antisense	intron
chrI	1139911	A	Y48G8AL.9	antisense	intron
chrI	1139922	T	Y48G8AL.9	antisense	intron
chrI	1139932	T	Y48G8AL.9	antisense	intron
chrI	1139945	T	Y48G8AL.9	antisense	intron
chrI	1139949	T	Y48G8AL.9	antisense	intron
chrI	1139965	T	Y48G8AL.9	antisense	intron
chrI	1139972	T	Y48G8AL.9	antisense	intron
chrI	1140001	T	Y48G8AL.9	antisense	intron
chrI	1140002	T	Y48G8AL.9	antisense	intron
chrI	1140014	T	Y48G8AL.9	antisense	intron
chrI	1140015	T	Y48G8AL.9	antisense	intron
chrI	1140064	T	Y48G8AL.9	antisense	intron
chrI	1140110	T	Y48G8AL.9	antisense	intron
chrI	11403021	A	ego-2	antisense	intron
chrI	1142657	T	Y48G8AL.10	antisense	intron
chrI	11432078	T	ND	NA	intergenic
chrI	11435024	T	nhr-73	antisense	coding
chrI	11435274	A	nhr-73	antisense	intron
chrI	1143608	T	Y48G8AL.10	antisense	intron
chrI	1143642	T	Y48G8AL.10	antisense	intron
chrI	1143645	T	Y48G8AL.10	antisense	intron
chrI	1143784	A	Y48G8AL.10	antisense	intron
chrI	1143797	T	Y48G8AL.10	antisense	intron
chrI	1143807	T	Y48G8AL.10	antisense	intron
chrI	1143813	T	Y48G8AL.10	antisense	intron
chrI	1144564	A	Y48G8AL.10	antisense	intron
chrI	1144570	A	Y48G8AL.10	antisense	intron
chrI	1144580	A	Y48G8AL.10	antisense	intron
chrI	1144593	T	Y48G8AL.10	antisense	intron
chrI	1144612	A	Y48G8AL.10	antisense	intron
chrI	1144719	A	Y48G8AL.10	antisense	intron
chrI	1144758	A	Y48G8AL.10	antisense	intron
chrI	1144790	T	Y48G8AL.10	antisense	intron
chrI	1144791	A	Y48G8AL.10	antisense	intron
chrI	1144794	T	Y48G8AL.10	antisense	intron
chrI	1144795	T	Y48G8AL.10	antisense	intron
chrI	1144803	T	Y48G8AL.10	antisense	intron
chrI	1144818	A	Y48G8AL.10	antisense	intron
chrI	1144821	A	Y48G8AL.10	antisense	intron
chrI	11451522	A	ZK1025.2	antisense	intron
chrI	11451556	A	ZK1025.2	antisense	intron
chrI	11451560	A	ZK1025.2	antisense	intron
chrI	11451566	A	ZK1025.2	antisense	intron
chrI	11451572	A	ZK1025.2	antisense	intron
chrI	1145232	A	Y48G8AL.10	antisense	intron
chrI	1145233	A	Y48G8AL.10	antisense	intron
chrI	1145266	T	Y48G8AL.10	antisense	intron
chrI	1145324	T	Y48G8AL.10	antisense	intron
chrI	1145332	T	Y48G8AL.10	antisense	intron
chrI	1145349	T	Y48G8AL.10	antisense	intron
chrI	1145360	T	Y48G8AL.10	antisense	intron
chrI	1145379	T	Y48G8AL.10	antisense	intron
chrI	1145407	T	Y48G8AL.10	antisense	intron
chrI	1145464	T	Y48G8AL.10	antisense	intron
chrI	1145465	T	Y48G8AL.10	antisense	intron
chrI	1145468	T	Y48G8AL.10	antisense	intron
chrI	1145478	T	Y48G8AL.10	antisense	intron
chrI	1145479	T	Y48G8AL.10	antisense	intron
chrI	1145483	A	Y48G8AL.10	antisense	intron
chrI	1145491	A	Y48G8AL.10	antisense	intron
chrI	1145492	A	Y48G8AL.10	antisense	intron
chrI	1145495	T	Y48G8AL.10	antisense	intron
chrI	1145496	A	Y48G8AL.10	antisense	intron
chrI	11455464	T	ND	NA	intergenic
chrI	11458011	T	ZK1025.4	antisense	intron
chrI	11459043	A	ZK1025.4	antisense	coding
chrI	11459044	A	ZK1025.4	antisense	coding
chrI	11469842	T	ZK1025.8	sense	intron
chrI	11469848	T	ZK1025.8	sense	intron
chrI	11469854	T	ZK1025.8	sense	intron
chrI	11469858	T	ZK1025.8	sense	intron
chrI	11469892	T	ZK1025.8	sense	intron
chrI	11478740	T	nhr-245	sense	intron
chrI	11478990	A	nhr-245	sense	coding
chrI	11481262	A	ND	NA	intergenic
chrI	11481291	T	ND	NA	intergenic
chrI	1148133	T	Y48G8AL.10	antisense	intron
chrI	1148151	T	Y48G8AL.10	antisense	intron
chrI	1148164	T	Y48G8AL.10	antisense	intron
chrI	11481691	T	ND	NA	intergenic
chrI	1148226	T	Y48G8AL.10	antisense	intron
chrI	1148239	T	Y48G8AL.10	antisense	intron
chrI	1148248	T	Y48G8AL.10	antisense	intron
chrI	1148249	T	Y48G8AL.10	antisense	intron
chrI	1148260	T	Y48G8AL.10	antisense	intron
chrI	1148308	T	Y48G8AL.10	antisense	intron
chrI	1148565	T	Y48G8AL.10	antisense	intron
chrI	1148586	A	Y48G8AL.10	antisense	intron
chrI	1148587	A	Y48G8AL.10	antisense	intron
chrI	1148589	A	Y48G8AL.10	antisense	intron
chrI	1148598	T	Y48G8AL.10	antisense	intron
chrI	1148617	A	Y48G8AL.10	antisense	intron
chrI	11487061	A	K08C9.2	antisense	coding
chrI	1149056	T	Y48G8AL.10	antisense	intron
chrI	1149057	A	Y48G8AL.10	antisense	intron
chrI	1149060	T	Y48G8AL.10	antisense	intron
chrI	1149061	T	Y48G8AL.10	antisense	intron
chrI	1149069	T	Y48G8AL.10	antisense	intron
chrI	1149120	T	Y48G8AL.10	antisense	intron
chrI	1149126	T	Y48G8AL.10	antisense	intron
chrI	1149160	A	Y48G8AL.10	antisense	intron
chrI	1149188	A	Y48G8AL.10	antisense	intron
chrI	11493929	T	K08C9.8	antisense	5utr
chrI	1149472	T	Y48G8AL.10	antisense	intron
chrI	1149488	T	Y48G8AL.10	antisense	intron
chrI	11495805	A	K08C9.7	antisense	coding
chrI	1149584	T	Y48G8AL.10	antisense	intron
chrI	1149592	T	Y48G8AL.10	antisense	intron
chrI	1149629	A	Y48G8AL.10	antisense	intron
chrI	1149637	T	Y48G8AL.10	antisense	intron
chrI	1149638	T	Y48G8AL.10	antisense	intron
chrI	1149648	A	Y48G8AL.10	antisense	intron
chrI	11497745	T	ND	NA	intergenic
chrI	1149774	T	Y48G8AL.10	antisense	intron
chrI	1149777	T	Y48G8AL.10	antisense	intron
chrI	1149792	A	Y48G8AL.10	antisense	intron
chrI	1149800	A	Y48G8AL.10	antisense	intron
chrI	1149801	A	Y48G8AL.10	antisense	intron
chrI	1149804	T	Y48G8AL.10	antisense	intron
chrI	1149805	A	Y48G8AL.10	antisense	intron
chrI	1149828	T	Y48G8AL.10	antisense	intron
chrI	1149837	T	Y48G8AL.10	antisense	intron
chrI	11502551	T	F32B4.8	sense	coding
chrI	1150604	A	Y48G8AL.10	antisense	coding
chrI	1151352	T	Y48G8AL.10	antisense	intron
chrI	1151359	T	Y48G8AL.10	antisense	intron
chrI	1151361	T	Y48G8AL.10	antisense	intron
chrI	1151370	A	Y48G8AL.10	antisense	intron
chrI	1151375	T	Y48G8AL.10	antisense	intron
chrI	1151376	T	Y48G8AL.10	antisense	intron
chrI	1151385	T	Y48G8AL.10	antisense	intron
chrI	1151386	T	Y48G8AL.10	antisense	intron
chrI	1151393	A	Y48G8AL.10	antisense	intron
chrI	1151394	A	Y48G8AL.10	antisense	intron
chrI	1151408	T	Y48G8AL.10	antisense	intron
chrI	1151442	A	Y48G8AL.10	antisense	intron
chrI	1151444	T	Y48G8AL.10	antisense	intron
chrI	1151452	T	Y48G8AL.10	antisense	intron
chrI	1151454	A	Y48G8AL.10	antisense	intron
chrI	1151455	T	Y48G8AL.10	antisense	intron
chrI	1151457	T	Y48G8AL.10	antisense	intron
chrI	1151459	T	Y48G8AL.10	antisense	intron
chrI	1151460	T	Y48G8AL.10	antisense	intron
chrI	1151470	A	Y48G8AL.10	antisense	intron
chrI	1151478	T	Y48G8AL.10	antisense	intron
chrI	115148	T	ND	NA	intergenic
chrI	1151505	T	Y48G8AL.10	antisense	intron
chrI	1151506	T	Y48G8AL.10	antisense	intron
chrI	1151514	T	Y48G8AL.10	antisense	intron
chrI	1151515	A	Y48G8AL.10	antisense	intron
chrI	1151518	A	Y48G8AL.10	antisense	intron
chrI	1151533	T	Y48G8AL.10	antisense	intron
chrI	115158	T	ND	NA	intergenic
chrI	1151605	T	Y48G8AL.10	antisense	intron
chrI	1151606	T	Y48G8AL.10	antisense	intron
chrI	1151704	A	Y48G8AL.10	antisense	intron
chrI	115170	T	ND	NA	intergenic
chrI	115171	T	ND	NA	intergenic
chrI	1151726	A	Y48G8AL.10	antisense	intron
chrI	1151731	A	Y48G8AL.10	antisense	intron
chrI	1151738	T	Y48G8AL.10	antisense	intron
chrI	1151746	A	Y48G8AL.10	antisense	intron
chrI	1151753	A	Y48G8AL.10	antisense	intron
chrI	1151758	A	Y48G8AL.10	antisense	intron
chrI	1151759	A	Y48G8AL.10	antisense	intron
chrI	1151762	T	Y48G8AL.10	antisense	intron
chrI	1151772	T	Y48G8AL.10	antisense	intron
chrI	1151773	A	Y48G8AL.10	antisense	intron
chrI	1151781	A	Y48G8AL.10	antisense	intron
chrI	1151782	A	Y48G8AL.10	antisense	intron
chrI	1151791	T	Y48G8AL.10	antisense	intron
chrI	1151792	T	Y48G8AL.10	antisense	intron
chrI	1151793	T	Y48G8AL.10	antisense	intron
chrI	1151794	A	Y48G8AL.10	antisense	intron
chrI	1151807	T	Y48G8AL.10	antisense	intron
chrI	1151817	T	Y48G8AL.10	antisense	intron
chrI	1151818	T	Y48G8AL.10	antisense	intron
chrI	1151828	A	Y48G8AL.10	antisense	intron
chrI	1151832	A	Y48G8AL.10	antisense	intron
chrI	1151833	T	Y48G8AL.10	antisense	intron
chrI	1151835	A	Y48G8AL.10	antisense	intron
chrI	1151843	A	Y48G8AL.10	antisense	intron
chrI	1151845	T	Y48G8AL.10	antisense	intron
chrI	1151878	T	Y48G8AL.10	antisense	intron
chrI	1151881	T	Y48G8AL.10	antisense	intron
chrI	1151890	T	Y48G8AL.10	antisense	intron
chrI	1151893	T	Y48G8AL.10	antisense	intron
chrI	1151894	T	Y48G8AL.10	antisense	intron
chrI	1151901	A	Y48G8AL.10	antisense	intron
chrI	1151902	A	Y48G8AL.10	antisense	intron
chrI	1151911	A	Y48G8AL.10	antisense	intron
chrI	1151912	A	Y48G8AL.10	antisense	intron
chrI	1151917	T	Y48G8AL.10	antisense	intron
chrI	1151926	A	Y48G8AL.10	antisense	intron
chrI	1151928	A	Y48G8AL.10	antisense	intron
chrI	1151935	A	Y48G8AL.10	antisense	intron
chrI	1151995	T	Y48G8AL.10	antisense	intron
chrI	1151999	A	Y48G8AL.10	antisense	intron
chrI	115315	A	ND	NA	intergenic
chrI	115323	A	ND	NA	intergenic
chrI	115324	A	ND	NA	intergenic
chrI	115328	A	ND	NA	intergenic
chrI	115336	A	ND	NA	intergenic
chrI	115340	T	ND	NA	intergenic
chrI	115349	A	ND	NA	intergenic
chrI	115356	T	ND	NA	intergenic
chrI	1154648	T	ND	NA	intergenic
chrI	1154659	T	ND	NA	intergenic
chrI	1154704	T	ND	NA	intergenic
chrI	1154749	T	ND	NA	intergenic
chrI	1154772	T	ND	NA	intergenic
chrI	1154773	T	ND	NA	intergenic
chrI	1154849	T	ND	NA	intergenic
chrI	1154864	T	ND	NA	intergenic
chrI	1154873	T	ND	NA	intergenic
chrI	1154882	T	ND	NA	intergenic
chrI	1154924	T	ND	NA	intergenic
chrI	1154925	T	ND	NA	intergenic
chrI	1154940	T	ND	NA	intergenic
chrI	1154941	T	ND	NA	intergenic
chrI	1154950	T	ND	NA	intergenic
chrI	1154999	T	ND	NA	intergenic
chrI	1155058	T	ND	NA	intergenic
chrI	1155060	T	ND	NA	intergenic
chrI	1155083	T	ND	NA	intergenic
chrI	1155092	T	ND	NA	intergenic
chrI	1155113	T	ND	NA	intergenic
chrI	1155172	T	ND	NA	intergenic
chrI	1155196	T	ND	NA	intergenic
chrI	1155197	T	ND	NA	intergenic
chrI	11574508	A	F15D3.6	antisense	intron
chrI	11577013	T	F15D3.6	antisense	intron
chrI	11577061	T	F15D3.6	antisense	intron
chrI	11577069	T	F15D3.6	antisense	intron
chrI	11577092	T	F15D3.6	antisense	intron
chrI	1158714	T	Y48G8AL.7	sense	intron
chrI	1158718	T	Y48G8AL.7	sense	intron
chrI	1158719	T	Y48G8AL.7	sense	intron
chrI	1158728	T	Y48G8AL.7	sense	intron
chrI	1158729	T	Y48G8AL.7	sense	intron
chrI	1158734	T	Y48G8AL.7	sense	intron
chrI	1158764	T	Y48G8AL.7	sense	intron
chrI	1158769	T	Y48G8AL.7	sense	intron
chrI	1158945	T	Y48G8AL.7	sense	intron
chrI	1158958	T	Y48G8AL.7	sense	intron
chrI	1158960	T	Y48G8AL.7	sense	intron
chrI	1158966	A	Y48G8AL.7	sense	intron
chrI	1158967	A	Y48G8AL.7	sense	intron
chrI	1158975	T	Y48G8AL.7	sense	intron
chrI	1158979	T	Y48G8AL.7	sense	intron
chrI	1158980	A	Y48G8AL.7	sense	intron
chrI	1158982	T	Y48G8AL.7	sense	intron
chrI	1158986	T	Y48G8AL.7	sense	intron
chrI	11589966	A	ND	NA	intergenic
chrI	11595781	A	unc-75	sense	intron
chrI	1159681	A	Y48G8AL.7	sense	intron
chrI	1159682	A	Y48G8AL.7	sense	intron
chrI	1159726	T	Y48G8AL.7	sense	intron
chrI	1159783	T	Y48G8AL.7	sense	intron
chrI	1159805	A	Y48G8AL.7	sense	intron
chrI	11600106	A	unc-75	sense	intron
chrI	11603046	A	ND	NA	intergenic
chrI	11603047	A	ND	NA	intergenic
chrI	11603059	A	ND	NA	intergenic
chrI	11603113	A	ND	NA	intergenic
chrI	11603141	A	ND	NA	intergenic
chrI	11603151	A	ND	NA	intergenic
chrI	11603302	A	ND	NA	intergenic
chrI	11603339	A	ND	NA	intergenic
chrI	11603340	A	ND	NA	intergenic
chrI	11603399	A	ND	NA	intergenic
chrI	11603425	A	ND	NA	intergenic
chrI	11603427	A	ND	NA	intergenic
chrI	11603435	A	ND	NA	intergenic
chrI	11603445	A	ND	NA	intergenic
chrI	11603472	A	ND	NA	intergenic
chrI	11603473	A	ND	NA	intergenic
chrI	11603640	A	ND	NA	intergenic
chrI	11603641	A	ND	NA	intergenic
chrI	11603746	A	ND	NA	intergenic
chrI	11604347	T	ND	NA	intergenic
chrI	11604443	T	ND	NA	intergenic
chrI	11605799	T	C17D12.7	antisense	intron
chrI	11605820	T	C17D12.7	antisense	intron
chrI	11605830	T	C17D12.7	antisense	intron
chrI	11606007	T	C17D12.7	antisense	intron
chrI	11606008	T	C17D12.7	antisense	intron
chrI	1160998	A	Y48G8AL.7	sense	intron
chrI	1161010	T	Y48G8AL.7	sense	intron
chrI	1161013	T	Y48G8AL.7	sense	intron
chrI	1161014	A	Y48G8AL.7	sense	intron
chrI	1161026	A	Y48G8AL.7	sense	intron
chrI	1161112	T	Y48G8AL.7	sense	intron
chrI	1161113	T	Y48G8AL.7	sense	intron
chrI	1161114	A	Y48G8AL.7	sense	intron
chrI	1161116	T	Y48G8AL.7	sense	intron
chrI	1161126	A	Y48G8AL.7	sense	intron
chrI	1161127	A	Y48G8AL.7	sense	intron
chrI	1161132	A	Y48G8AL.7	sense	intron
chrI	1161135	T	Y48G8AL.7	sense	intron
chrI	1161140	T	Y48G8AL.7	sense	intron
chrI	1161143	A	Y48G8AL.7	sense	intron
chrI	1161150	A	Y48G8AL.7	sense	intron
chrI	1161151	A	Y48G8AL.7	sense	intron
chrI	1161163	A	Y48G8AL.7	sense	intron
chrI	1161165	T	Y48G8AL.7	sense	intron
chrI	1161166	A	Y48G8AL.7	sense	intron
chrI	1161167	A	Y48G8AL.7	sense	intron
chrI	1161179	T	Y48G8AL.7	sense	intron
chrI	1161190	A	Y48G8AL.7	sense	intron
chrI	1161198	T	Y48G8AL.7	sense	intron
chrI	1161200	A	Y48G8AL.7	sense	intron
chrI	1161215	A	Y48G8AL.7	sense	intron
chrI	1161218	T	Y48G8AL.7	sense	intron
chrI	1161225	T	Y48G8AL.7	sense	intron
chrI	1161226	T	Y48G8AL.7	sense	intron
chrI	1161227	A	Y48G8AL.7	sense	intron
chrI	1161244	A	Y48G8AL.7	sense	intron
chrI	1161245	A	Y48G8AL.7	sense	intron
chrI	1161257	A	Y48G8AL.7	sense	intron
chrI	1161258	A	Y48G8AL.7	sense	intron
chrI	1161278	A	Y48G8AL.7	sense	intron
chrI	1161281	T	Y48G8AL.7	sense	intron
chrI	1161294	T	Y48G8AL.7	sense	intron
chrI	1161303	T	Y48G8AL.7	sense	intron
chrI	1161337	A	Y48G8AL.7	sense	intron
chrI	1161340	T	Y48G8AL.7	sense	intron
chrI	1161386	A	Y48G8AL.7	sense	intron
chrI	1161387	A	Y48G8AL.7	sense	intron
chrI	1161389	T	Y48G8AL.7	sense	intron
chrI	1161399	T	Y48G8AL.7	sense	intron
chrI	1161401	A	Y48G8AL.7	sense	intron
chrI	1161402	A	Y48G8AL.7	sense	intron
chrI	1161412	A	Y48G8AL.7	sense	intron
chrI	1161484	A	Y48G8AL.7	sense	intron
chrI	1161501	A	Y48G8AL.7	sense	intron
chrI	1161502	A	Y48G8AL.7	sense	intron
chrI	1161509	A	Y48G8AL.7	sense	intron
chrI	1161510	T	Y48G8AL.7	sense	intron
chrI	1161512	T	Y48G8AL.7	sense	intron
chrI	1161513	T	Y48G8AL.7	sense	intron
chrI	1161514	A	Y48G8AL.7	sense	intron
chrI	1161525	T	Y48G8AL.7	sense	intron
chrI	1161526	T	Y48G8AL.7	sense	intron
chrI	1161527	T	Y48G8AL.7	sense	intron
chrI	1161534	T	Y48G8AL.7	sense	intron
chrI	1161537	T	Y48G8AL.7	sense	intron
chrI	1161538	T	Y48G8AL.7	sense	intron
chrI	1161545	T	Y48G8AL.7	sense	intron
chrI	1161548	A	Y48G8AL.7	sense	intron
chrI	1161562	A	Y48G8AL.7	sense	intron
chrI	1161570	A	Y48G8AL.7	sense	intron
chrI	11616745	A	ND	NA	intergenic
chrI	1161680	A	Y48G8AL.7	sense	intron
chrI	1161718	T	Y48G8AL.7	sense	intron
chrI	1161721	A	Y48G8AL.7	sense	intron
chrI	1161722	A	Y48G8AL.7	sense	intron
chrI	11620044	T	C17D12.3	antisense	coding
chrI	11623316	A	Y47H9A.1	sense	coding
chrI	11626615	T	ND	NA	intergenic
chrI	11627737	A	ND	NA	intergenic
chrI	11627748	A	ND	NA	intergenic
chrI	1162875	T	Y48G8AL.7	sense	coding
chrI	11629063	T	ND	NA	intergenic
chrI	11629074	T	ND	NA	intergenic
chrI	1163222	T	haf-6	antisense	intron
chrI	1163337	A	haf-6	antisense	intron
chrI	1163358	A	haf-6	antisense	intron
chrI	1163359	A	haf-6	antisense	intron
chrI	1163396	A	haf-6	antisense	intron
chrI	1163397	A	haf-6	antisense	intron
chrI	1163402	A	haf-6	antisense	intron
chrI	1163409	T	haf-6	antisense	intron
chrI	1163504	A	haf-6	antisense	intron
chrI	1164065	T	haf-6	antisense	intron
chrI	1164094	T	haf-6	antisense	intron
chrI	1164908	T	haf-6	antisense	intron
chrI	1164918	T	haf-6	antisense	intron
chrI	1165001	T	haf-6	antisense	intron
chrI	1165247	T	haf-6	antisense	intron
chrI	1165603	A	haf-6	antisense	intron
chrI	11677683	A	kpc-1	sense	intron
chrI	11682955	T	ND	NA	intergenic
chrI	1168302	T	haf-6	antisense	intron
chrI	1168323	T	haf-6	antisense	intron
chrI	1168337	T	haf-6	antisense	intron
chrI	1168338	T	haf-6	antisense	intron
chrI	1168352	T	haf-6	antisense	intron
chrI	1168378	T	haf-6	antisense	intron
chrI	1168516	T	haf-6	antisense	intron
chrI	1168517	T	haf-6	antisense	intron
chrI	1168518	T	haf-6	antisense	intron
chrI	1168572	T	haf-6	antisense	intron
chrI	1168573	T	haf-6	antisense	intron
chrI	1168596	T	haf-6	antisense	intron
chrI	11686114	A	ND	NA	intergenic
chrI	1168618	T	haf-6	antisense	intron
chrI	11686314	A	ND	NA	intergenic
chrI	11689017	A	scrm-1	antisense	intron
chrI	11700185	T	sri-12	sense	coding
chrI	11700236	T	sri-12	sense	coding
chrI	11723536	A	F35E2.9	antisense	coding
chrI	11724242	A	F35E2.9	antisense	coding
chrI	11730973	A	ND	NA	intergenic
chrI	1174575	T	haf-6	antisense	intron
chrI	1175009	A	haf-6	antisense	intron
chrI	1175019	A	haf-6	antisense	intron
chrI	1175024	A	haf-6	antisense	intron
chrI	1175026	A	haf-6	antisense	intron
chrI	1175034	T	haf-6	antisense	intron
chrI	117684	A	ND	NA	intergenic
chrI	1177355	T	smg-2	sense	intron
chrI	1178554	A	smg-2	sense	intron
chrI	1178563	A	smg-2	sense	intron
chrI	1178587	A	smg-2	sense	intron
chrI	11801651	A	T02G6.2	antisense	coding
chrI	1181927	A	smg-2	sense	intron
chrI	1181930	T	smg-2	sense	intron
chrI	1181931	T	smg-2	sense	intron
chrI	1181968	T	smg-2	sense	intron
chrI	1181969	T	smg-2	sense	intron
chrI	1182008	T	smg-2	sense	intron
chrI	1182019	T	smg-2	sense	intron
chrI	1182079	A	smg-2	sense	intron
chrI	11824255	A	ND	NA	intergenic
chrI	11827057	A	ND	NA	intergenic
chrI	11831912	A	Y47H9C.1	antisense	intron
chrI	11846054	A	dhhc-2	sense	intron
chrI	11846064	A	dhhc-2	sense	intron
chrI	11846339	A	dhhc-2	sense	intron
chrI	11846342	A	dhhc-2	sense	intron
chrI	11846394	A	dhhc-2	sense	intron
chrI	11846486	A	dhhc-2	sense	intron
chrI	11846491	A	dhhc-2	sense	intron
chrI	11846509	A	dhhc-2	sense	intron
chrI	11846534	A	dhhc-2	sense	intron
chrI	11846535	A	dhhc-2	sense	intron
chrI	11846537	A	dhhc-2	sense	intron
chrI	11846538	A	dhhc-2	sense	intron
chrI	11846542	A	dhhc-2	sense	intron
chrI	11849108	T	dhhc-2	sense	coding
chrI	11849298	T	ND	NA	intergenic
chrI	11849300	A	ND	NA	intergenic
chrI	11849313	A	ND	NA	intergenic
chrI	11849325	A	ND	NA	intergenic
chrI	11849346	A	ND	NA	intergenic
chrI	11849358	T	ND	NA	intergenic
chrI	11851526	T	ced-1	antisense	3utr
chrI	11851547	T	ced-1	antisense	3utr
chrI	11851572	T	ced-1	antisense	3utr
chrI	11851574	A	ced-1	antisense	3utr
chrI	1185636	A	smg-2	sense	intron
chrI	11882796	T	dnj-27	sense	intron
chrI	11882797	T	dnj-27	sense	intron
chrI	11882826	A	dnj-27	sense	intron
chrI	11882827	A	dnj-27	sense	intron
chrI	11882833	A	dnj-27	sense	intron
chrI	11883195	A	dnj-27	sense	intron
chrI	11883200	A	dnj-27	sense	intron
chrI	11883708	A	dnj-27	sense	intron
chrI	11883721	A	dnj-27	sense	intron
chrI	11883725	T	dnj-27	sense	intron
chrI	11883726	T	dnj-27	sense	intron
chrI	11883727	A	dnj-27	sense	intron
chrI	11883728	A	dnj-27	sense	intron
chrI	11883755	A	dnj-27	sense	intron
chrI	11883766	A	dnj-27	sense	intron
chrI	11883845	T	dnj-27	sense	intron
chrI	11883903	A	dnj-27	sense	intron
chrI	11885659	A	dnj-27	sense	intron
chrI	1188572	A	smg-2	sense	intron
chrI	1188578	T	smg-2	sense	intron
chrI	1188584	A	smg-2	sense	intron
chrI	11891198	T	ND	NA	intergenic
chrI	1189947	T	smg-2	sense	intron
chrI	11903263	T	ND	NA	intergenic
chrI	11904	T	nlp-40	sense	intron
chrI	11905142	T	ND	NA	intergenic
chrI	11905811	A	ND	NA	intergenic
chrI	11905821	A	ND	NA	intergenic
chrI	11905	A	nlp-40	sense	intron
chrI	11917384	T	hda-3	antisense	intron
chrI	11917	T	nlp-40	sense	intron
chrI	11922595	T	fdps-1	antisense	intron
chrI	11922898	T	fdps-1	antisense	intron
chrI	11922952	T	fdps-1	antisense	intron
chrI	11922953	T	fdps-1	antisense	intron
chrI	11924689	T	ND	NA	intergenic
chrI	11924690	T	ND	NA	intergenic
chrI	11924714	T	ND	NA	intergenic
chrI	11924725	T	ND	NA	intergenic
chrI	11924781	T	wve-1	antisense	3utr
chrI	11924782	T	wve-1	antisense	3utr
chrI	11924840	T	wve-1	antisense	intron
chrI	11924969	T	wve-1	antisense	intron
chrI	11925190	T	wve-1	antisense	3utr
chrI	11928027	T	wve-1	antisense	intron
chrI	11928063	T	wve-1	antisense	intron
chrI	11938	T	nlp-40	sense	intron
chrI	1194695	T	Y48G8AL.5	sense	intron
chrI	1194837	A	Y48G8AL.5	sense	intron
chrI	11960610	A	hsf-1	antisense	intron
chrI	11960611	A	hsf-1	antisense	intron
chrI	11960872	T	hsf-1	antisense	intron
chrI	11960873	T	hsf-1	antisense	intron
chrI	11975752	A	ND	NA	intergenic
chrI	11975774	A	ND	NA	intergenic
chrI	11975775	A	ND	NA	intergenic
chrI	11975791	A	ND	NA	intergenic
chrI	11976270	A	ND	NA	intergenic
chrI	1197781	T	Y48G8AL.5	sense	intron
chrI	1197804	A	Y48G8AL.5	sense	intron
chrI	1197805	A	Y48G8AL.5	sense	intron
chrI	1197820	T	Y48G8AL.5	sense	intron
chrI	1197826	T	Y48G8AL.5	sense	intron
chrI	1197883	A	Y48G8AL.5	sense	intron
chrI	1197885	T	Y48G8AL.5	sense	intron
chrI	1197896	A	Y48G8AL.5	sense	intron
chrI	1197897	A	Y48G8AL.5	sense	intron
chrI	1197899	A	Y48G8AL.5	sense	intron
chrI	1197900	A	Y48G8AL.5	sense	intron
chrI	1197906	T	Y48G8AL.5	sense	intron
chrI	1197908	T	Y48G8AL.5	sense	intron
chrI	1197909	T	Y48G8AL.5	sense	intron
chrI	1197912	A	Y48G8AL.5	sense	intron
chrI	1197918	T	Y48G8AL.5	sense	intron
chrI	1197919	A	Y48G8AL.5	sense	intron
chrI	1197924	A	Y48G8AL.5	sense	intron
chrI	1197934	T	Y48G8AL.5	sense	intron
chrI	1197942	T	Y48G8AL.5	sense	intron
chrI	1197945	T	Y48G8AL.5	sense	intron
chrI	1197949	T	Y48G8AL.5	sense	intron
chrI	1197968	T	Y48G8AL.5	sense	intron
chrI	1197988	T	Y48G8AL.5	sense	intron
chrI	1197995	T	Y48G8AL.5	sense	intron
chrI	1197996	T	Y48G8AL.5	sense	intron
chrI	1198004	T	Y48G8AL.5	sense	intron
chrI	1198005	A	Y48G8AL.5	sense	intron
chrI	1198008	A	Y48G8AL.5	sense	intron
chrI	1198061	A	Y48G8AL.5	sense	intron
chrI	1198064	T	Y48G8AL.5	sense	intron
chrI	1198074	A	Y48G8AL.5	sense	intron
chrI	1198075	A	Y48G8AL.5	sense	intron
chrI	1198085	T	Y48G8AL.5	sense	intron
chrI	1198095	T	Y48G8AL.5	sense	intron
chrI	1198096	T	Y48G8AL.5	sense	intron
chrI	1198098	A	Y48G8AL.5	sense	intron
chrI	1198107	A	Y48G8AL.5	sense	intron
chrI	1198108	A	Y48G8AL.5	sense	intron
chrI	1198110	T	Y48G8AL.5	sense	intron
chrI	1198111	T	Y48G8AL.5	sense	intron
chrI	1198156	A	Y48G8AL.5	sense	intron
chrI	1198157	A	Y48G8AL.5	sense	intron
chrI	1198171	A	Y48G8AL.5	sense	intron
chrI	1198172	A	Y48G8AL.5	sense	intron
chrI	1198182	A	Y48G8AL.5	sense	intron
chrI	1198193	T	Y48G8AL.5	sense	intron
chrI	1198194	A	Y48G8AL.5	sense	intron
chrI	1198203	A	Y48G8AL.5	sense	intron
chrI	1198206	T	Y48G8AL.5	sense	intron
chrI	1198207	A	Y48G8AL.5	sense	intron
chrI	1198210	T	Y48G8AL.5	sense	intron
chrI	1198219	T	Y48G8AL.5	sense	intron
chrI	1198236	A	Y48G8AL.5	sense	intron
chrI	1198241	T	Y48G8AL.5	sense	intron
chrI	1198243	A	Y48G8AL.5	sense	intron
chrI	1198246	A	Y48G8AL.5	sense	intron
chrI	1198248	A	Y48G8AL.5	sense	intron
chrI	1198249	A	Y48G8AL.5	sense	intron
chrI	1198252	T	Y48G8AL.5	sense	intron
chrI	1198262	T	Y48G8AL.5	sense	intron
chrI	1198263	A	Y48G8AL.5	sense	intron
chrI	1198284	A	Y48G8AL.5	sense	intron
chrI	1198287	T	Y48G8AL.5	sense	intron
chrI	1198297	T	Y48G8AL.5	sense	intron
chrI	1198331	T	Y48G8AL.5	sense	intron
chrI	11997171	A	ND	NA	intergenic
chrI	11997173	T	ND	NA	intergenic
chrI	11997174	A	ND	NA	intergenic
chrI	11997179	T	ND	NA	intergenic
chrI	11997184	A	ND	NA	intergenic
chrI	11997207	A	ND	NA	intergenic
chrI	11997210	T	ND	NA	intergenic
chrI	11997220	A	ND	NA	intergenic
chrI	11997228	A	ND	NA	intergenic
chrI	11997229	T	ND	NA	intergenic
chrI	11997236	T	ND	NA	intergenic
chrI	11997239	A	ND	NA	intergenic
chrI	11997267	A	ND	NA	intergenic
chrI	11997270	T	ND	NA	intergenic
chrI	11997271	A	ND	NA	intergenic
chrI	11997272	A	ND	NA	intergenic
chrI	11997275	T	ND	NA	intergenic
chrI	11997282	T	ND	NA	intergenic
chrI	11997283	T	ND	NA	intergenic
chrI	11997291	T	ND	NA	intergenic
chrI	11997292	A	ND	NA	intergenic
chrI	11997293	A	ND	NA	intergenic
chrI	11997305	T	ND	NA	intergenic
chrI	11997306	T	ND	NA	intergenic
chrI	11997360	T	ND	NA	intergenic
chrI	11997372	T	ND	NA	intergenic
chrI	11997381	T	ND	NA	intergenic
chrI	11997382	T	ND	NA	intergenic
chrI	11997383	T	ND	NA	intergenic
chrI	11997397	T	ND	NA	intergenic
chrI	11997398	T	ND	NA	intergenic
chrI	11997459	A	ND	NA	intergenic
chrI	11997484	A	ND	NA	intergenic
chrI	11997486	A	ND	NA	intergenic
chrI	11997490	A	ND	NA	intergenic
chrI	11997507	A	ND	NA	intergenic
chrI	11997508	A	ND	NA	intergenic
chrI	11997514	A	ND	NA	intergenic
chrI	11997516	A	ND	NA	intergenic
chrI	11997558	A	ND	NA	intergenic
chrI	11997559	A	ND	NA	intergenic
chrI	11997573	A	ND	NA	intergenic
chrI	11997605	A	ND	NA	intergenic
chrI	11997607	A	ND	NA	intergenic
chrI	11997612	A	ND	NA	intergenic
chrI	11997620	A	ND	NA	intergenic
chrI	11997635	T	ND	NA	intergenic
chrI	11997636	A	ND	NA	intergenic
chrI	11997645	A	ND	NA	intergenic
chrI	11997646	A	ND	NA	intergenic
chrI	11997652	A	ND	NA	intergenic
chrI	11997663	A	ND	NA	intergenic
chrI	12002237	T	Y53C10A.5	sense	intron
chrI	12008563	A	ND	NA	intergenic
chrI	12010920	A	ND	NA	intergenic
chrI	1201491	A	Y48G8AL.5	sense	intron
chrI	1201520	A	Y48G8AL.5	sense	intron
chrI	1201567	A	Y48G8AL.5	sense	intron
chrI	12020109	A	ND	NA	intergenic
chrI	1202100	A	Y48G8AL.5	sense	intron
chrI	1202111	T	Y48G8AL.5	sense	intron
chrI	1202132	T	Y48G8AL.5	sense	intron
chrI	1202133	A	Y48G8AL.5	sense	intron
chrI	1202134	A	Y48G8AL.5	sense	intron
chrI	1202136	T	Y48G8AL.5	sense	intron
chrI	1202137	T	Y48G8AL.5	sense	intron
chrI	1202219	A	Y48G8AL.5	sense	intron
chrI	1202223	T	Y48G8AL.5	sense	intron
chrI	12023754	T	Y53C10A.10	sense	intron
chrI	1202758	T	Y48G8AL.5	sense	intron
chrI	1202803	T	Y48G8AL.5	sense	intron
chrI	1202804	T	Y48G8AL.5	sense	intron
chrI	1202839	T	Y48G8AL.5	sense	intron
chrI	1202858	T	Y48G8AL.5	sense	intron
chrI	1202886	T	Y48G8AL.5	sense	intron
chrI	1202901	A	Y48G8AL.5	sense	intron
chrI	1202940	T	Y48G8AL.5	sense	intron
chrI	1202943	T	Y48G8AL.5	sense	intron
chrI	1202953	T	Y48G8AL.5	sense	intron
chrI	1202954	T	Y48G8AL.5	sense	intron
chrI	1202958	A	Y48G8AL.5	sense	intron
chrI	1202966	A	Y48G8AL.5	sense	intron
chrI	1202967	A	Y48G8AL.5	sense	intron
chrI	1202970	T	Y48G8AL.5	sense	intron
chrI	1202971	A	Y48G8AL.5	sense	intron
chrI	1203003	T	Y48G8AL.5	sense	intron
chrI	12048190	A	ksr-2	antisense	intron
chrI	12048522	A	ksr-2	antisense	intron
chrI	12048541	A	ksr-2	antisense	intron
chrI	12048630	A	ksr-2	antisense	intron
chrI	12048747	T	ksr-2	antisense	intron
chrI	12048770	T	ksr-2	antisense	intron
chrI	12048923	A	ksr-2	antisense	intron
chrI	12048991	A	ksr-2	antisense	intron
chrI	12049017	A	ksr-2	antisense	intron
chrI	12049060	T	ksr-2	antisense	intron
chrI	12049075	A	ksr-2	antisense	intron
chrI	12049083	T	ksr-2	antisense	intron
chrI	12049096	T	ksr-2	antisense	intron
chrI	12049102	A	ksr-2	antisense	intron
chrI	12049561	T	ksr-2	antisense	intron
chrI	12049562	T	ksr-2	antisense	intron
chrI	12049563	A	ksr-2	antisense	intron
chrI	12049593	T	ksr-2	antisense	intron
chrI	12049605	A	ksr-2	antisense	intron
chrI	12049616	A	ksr-2	antisense	intron
chrI	12049662	A	ksr-2	antisense	intron
chrI	12049665	T	ksr-2	antisense	intron
chrI	12049688	A	ksr-2	antisense	intron
chrI	12049755	A	ksr-2	antisense	intron
chrI	12049818	A	ksr-2	antisense	intron
chrI	12049819	A	ksr-2	antisense	intron
chrI	12049826	A	ksr-2	antisense	intron
chrI	12049834	T	ksr-2	antisense	intron
chrI	12049857	T	ksr-2	antisense	intron
chrI	12049859	A	ksr-2	antisense	intron
chrI	12049865	A	ksr-2	antisense	intron
chrI	12049866	A	ksr-2	antisense	intron
chrI	12049893	A	ksr-2	antisense	intron
chrI	1205267	T	Y48G8AL.5	sense	intron
chrI	1205277	T	Y48G8AL.5	sense	intron
chrI	12055355	A	ksr-2	antisense	intron
chrI	12061100	T	hrp-2	antisense	intron
chrI	12061304	T	hrp-2	antisense	intron
chrI	12061305	T	hrp-2	antisense	intron
chrI	12061393	T	hrp-2	antisense	intron
chrI	12061416	T	hrp-2	antisense	intron
chrI	12062545	T	hrp-2	antisense	intron
chrI	1206576	A	Y48G8AL.5	sense	intron
chrI	1206614	A	Y48G8AL.5	sense	intron
chrI	1206616	A	Y48G8AL.5	sense	intron
chrI	1206637	A	Y48G8AL.5	sense	intron
chrI	1206640	A	Y48G8AL.5	sense	intron
chrI	12066446	A	F58D5.2	antisense	intron
chrI	1206649	A	Y48G8AL.5	sense	intron
chrI	1206650	A	Y48G8AL.5	sense	intron
chrI	1206653	A	Y48G8AL.5	sense	intron
chrI	1206668	A	Y48G8AL.5	sense	intron
chrI	1206672	T	Y48G8AL.5	sense	intron
chrI	1206688	T	Y48G8AL.5	sense	intron
chrI	1206696	T	Y48G8AL.5	sense	intron
chrI	1206699	T	Y48G8AL.5	sense	intron
chrI	1206703	T	Y48G8AL.5	sense	intron
chrI	12067045	T	F58D5.2	antisense	intron
chrI	12067049	A	F58D5.2	antisense	intron
chrI	1206704	T	Y48G8AL.5	sense	intron
chrI	12067071	A	F58D5.2	antisense	intron
chrI	12067072	A	F58D5.2	antisense	intron
chrI	12067076	T	F58D5.2	antisense	intron
chrI	12067109	T	F58D5.2	antisense	intron
chrI	12067116	T	F58D5.2	antisense	intron
chrI	12067118	T	F58D5.2	antisense	intron
chrI	12067127	A	F58D5.2	antisense	intron
chrI	12067133	T	F58D5.2	antisense	intron
chrI	12067142	T	F58D5.2	antisense	intron
chrI	12067143	T	F58D5.2	antisense	intron
chrI	12067149	T	F58D5.2	antisense	intron
chrI	12067150	A	F58D5.2	antisense	intron
chrI	12067151	A	F58D5.2	antisense	intron
chrI	12067186	A	F58D5.2	antisense	intron
chrI	12067187	A	F58D5.2	antisense	intron
chrI	12067199	A	F58D5.2	antisense	intron
chrI	12067202	A	F58D5.2	antisense	intron
chrI	12067203	A	F58D5.2	antisense	intron
chrI	12067210	T	F58D5.2	antisense	intron
chrI	12067227	A	F58D5.2	antisense	intron
chrI	1206722	T	Y48G8AL.5	sense	intron
chrI	12067230	A	F58D5.2	antisense	intron
chrI	12067237	A	F58D5.2	antisense	intron
chrI	12067250	T	F58D5.2	antisense	intron
chrI	12067255	T	F58D5.2	antisense	intron
chrI	12067263	T	F58D5.2	antisense	intron
chrI	12067285	T	F58D5.2	antisense	intron
chrI	12067286	T	F58D5.2	antisense	intron
chrI	12067291	T	F58D5.2	antisense	intron
chrI	12067314	T	F58D5.2	antisense	intron
chrI	12067331	T	F58D5.2	antisense	intron
chrI	12067374	A	F58D5.2	antisense	intron
chrI	12067375	A	F58D5.2	antisense	intron
chrI	12067377	T	F58D5.2	antisense	intron
chrI	12067387	T	F58D5.2	antisense	intron
chrI	12067416	A	F58D5.2	antisense	intron
chrI	1206742	T	Y48G8AL.5	sense	intron
chrI	12067460	T	F58D5.2	antisense	intron
chrI	12067461	A	F58D5.2	antisense	intron
chrI	12067470	A	F58D5.2	antisense	intron
chrI	12067486	T	F58D5.2	antisense	intron
chrI	12067488	A	F58D5.2	antisense	intron
chrI	12067497	T	F58D5.2	antisense	intron
chrI	1206749	T	Y48G8AL.5	sense	intron
chrI	1206750	T	Y48G8AL.5	sense	intron
chrI	12067533	T	F58D5.2	antisense	intron
chrI	12067536	T	F58D5.2	antisense	intron
chrI	12067537	A	F58D5.2	antisense	intron
chrI	12067545	A	F58D5.2	antisense	intron
chrI	12067546	A	F58D5.2	antisense	intron
chrI	12067573	A	F58D5.2	antisense	intron
chrI	1206758	T	Y48G8AL.5	sense	intron
chrI	12067592	A	F58D5.2	antisense	intron
chrI	12067594	A	F58D5.2	antisense	intron
chrI	12067596	A	F58D5.2	antisense	intron
chrI	12067599	A	F58D5.2	antisense	intron
chrI	12067608	A	F58D5.2	antisense	intron
chrI	12067610	T	F58D5.2	antisense	intron
chrI	12067633	A	F58D5.2	antisense	intron
chrI	12067636	A	F58D5.2	antisense	intron
chrI	12067637	A	F58D5.2	antisense	intron
chrI	12067644	A	F58D5.2	antisense	intron
chrI	12067646	T	F58D5.2	antisense	intron
chrI	12067659	T	F58D5.2	antisense	intron
chrI	12067660	A	F58D5.2	antisense	intron
chrI	12067661	A	F58D5.2	antisense	intron
chrI	12067682	T	F58D5.2	antisense	intron
chrI	12067700	A	F58D5.2	antisense	intron
chrI	12067714	A	F58D5.2	antisense	intron
chrI	12067722	A	F58D5.2	antisense	intron
chrI	12067737	T	F58D5.2	antisense	intron
chrI	12067738	T	F58D5.2	antisense	intron
chrI	12067760	T	F58D5.2	antisense	intron
chrI	12067761	A	F58D5.2	antisense	intron
chrI	12067764	A	F58D5.2	antisense	intron
chrI	12067776	T	F58D5.2	antisense	intron
chrI	1206778	T	Y48G8AL.5	sense	intron
chrI	1206800	T	Y48G8AL.5	sense	intron
chrI	1206801	T	Y48G8AL.5	sense	intron
chrI	1206805	T	Y48G8AL.5	sense	intron
chrI	1206815	A	Y48G8AL.5	sense	intron
chrI	1206818	T	Y48G8AL.5	sense	intron
chrI	1206827	T	Y48G8AL.5	sense	intron
chrI	1206828	A	Y48G8AL.5	sense	intron
chrI	1206832	A	Y48G8AL.5	sense	intron
chrI	1206839	T	Y48G8AL.5	sense	intron
chrI	1206843	A	Y48G8AL.5	sense	intron
chrI	1206849	T	Y48G8AL.5	sense	intron
chrI	1206852	A	Y48G8AL.5	sense	intron
chrI	1206860	A	Y48G8AL.5	sense	intron
chrI	1206861	A	Y48G8AL.5	sense	intron
chrI	1206862	A	Y48G8AL.5	sense	intron
chrI	1206864	T	Y48G8AL.5	sense	intron
chrI	1206865	T	Y48G8AL.5	sense	intron
chrI	1206911	A	Y48G8AL.5	sense	intron
chrI	1206925	A	Y48G8AL.5	sense	intron
chrI	1206926	A	Y48G8AL.5	sense	intron
chrI	1206927	A	Y48G8AL.5	sense	intron
chrI	1206936	A	Y48G8AL.5	sense	intron
chrI	1206957	A	Y48G8AL.5	sense	intron
chrI	1207025	A	Y48G8AL.5	sense	intron
chrI	1207033	A	Y48G8AL.5	sense	intron
chrI	1207041	T	Y48G8AL.5	sense	intron
chrI	1207042	T	Y48G8AL.5	sense	intron
chrI	1207044	A	Y48G8AL.5	sense	intron
chrI	1207053	A	Y48G8AL.5	sense	intron
chrI	1207072	A	Y48G8AL.5	sense	intron
chrI	1207076	A	Y48G8AL.5	sense	intron
chrI	1207079	A	Y48G8AL.5	sense	intron
chrI	1207087	A	Y48G8AL.5	sense	intron
chrI	1207112	A	Y48G8AL.5	sense	intron
chrI	1207113	A	Y48G8AL.5	sense	intron
chrI	1207115	A	Y48G8AL.5	sense	intron
chrI	1207123	A	Y48G8AL.5	sense	intron
chrI	1207125	T	Y48G8AL.5	sense	intron
chrI	1207138	T	Y48G8AL.5	sense	intron
chrI	1207159	T	Y48G8AL.5	sense	intron
chrI	1207161	T	Y48G8AL.5	sense	intron
chrI	1207199	T	Y48G8AL.5	sense	intron
chrI	1207210	T	Y48G8AL.5	sense	intron
chrI	1207216	T	Y48G8AL.5	sense	intron
chrI	1207239	T	Y48G8AL.5	sense	intron
chrI	1207240	A	Y48G8AL.5	sense	intron
chrI	1207255	T	Y48G8AL.5	sense	intron
chrI	12073311	T	clp-3	antisense	intron
chrI	12073370	T	clp-3	antisense	intron
chrI	12073416	T	clp-3	antisense	intron
chrI	12073676	T	clp-3	antisense	intron
chrI	12073681	T	clp-3	antisense	intron
chrI	12073704	T	clp-3	antisense	intron
chrI	12073925	A	clp-3	antisense	intron
chrI	12081047	T	clp-3	antisense	intron
chrI	12089190	T	Y47H10A.3	antisense	intron
chrI	12089191	T	Y47H10A.3	antisense	intron
chrI	12102632	A	rrf-2	antisense	coding
chrI	12106129	A	ND	NA	intergenic
chrI	12106161	A	ND	NA	intergenic
chrI	12106261	A	ND	NA	intergenic
chrI	12106294	A	ND	NA	intergenic
chrI	12106304	A	ND	NA	intergenic
chrI	12106315	T	ND	NA	intergenic
chrI	12106326	A	ND	NA	intergenic
chrI	12106327	A	ND	NA	intergenic
chrI	12108723	T	ND	NA	intergenic
chrI	12161676	A	F15H9.7	sense	intron
chrI	12192500	T	ND	NA	intergenic
chrI	12192503	T	ND	NA	intergenic
chrI	12192563	T	ND	NA	intergenic
chrI	12192580	T	ND	NA	intergenic
chrI	12192583	T	ND	NA	intergenic
chrI	12192596	T	ND	NA	intergenic
chrI	12192606	T	ND	NA	intergenic
chrI	12192619	T	ND	NA	intergenic
chrI	12192653	T	ND	NA	intergenic
chrI	12192656	T	ND	NA	intergenic
chrI	12192669	T	ND	NA	intergenic
chrI	12192679	T	ND	NA	intergenic
chrI	12192692	T	ND	NA	intergenic
chrI	12192729	T	ND	NA	intergenic
chrI	12192754	T	ND	NA	intergenic
chrI	12192765	T	ND	NA	intergenic
chrI	12192794	A	ND	NA	intergenic
chrI	12192795	A	ND	NA	intergenic
chrI	12192801	A	ND	NA	intergenic
chrI	12193447	A	ND	NA	intergenic
chrI	12193460	A	ND	NA	intergenic
chrI	12193464	T	ND	NA	intergenic
chrI	12193465	T	ND	NA	intergenic
chrI	12193466	A	ND	NA	intergenic
chrI	12193467	A	ND	NA	intergenic
chrI	12193530	A	ND	NA	intergenic
chrI	12193567	A	ND	NA	intergenic
chrI	12193580	A	ND	NA	intergenic
chrI	12193603	A	ND	NA	intergenic
chrI	12193675	T	ND	NA	intergenic
chrI	12193698	T	ND	NA	intergenic
chrI	12193699	T	ND	NA	intergenic
chrI	12193714	A	ND	NA	intergenic
chrI	12218460	A	F14B6.2	antisense	3utr
chrI	12218677	A	F14B6.2	antisense	coding
chrI	12221058	A	F14B6.2	antisense	coding
chrI	12221340	T	F14B6.2	antisense	coding
chrI	12222137	A	F14B6.2	antisense	coding
chrI	12234141	T	F14B6.6	sense	intron
chrI	12234142	A	F14B6.6	sense	intron
chrI	12243817	A	ND	NA	intergenic
chrI	12243920	A	ND	NA	intergenic
chrI	12243925	A	ND	NA	intergenic
chrI	12274455	T	F41D3.9	antisense	coding
chrI	12282	A	nlp-40	sense	intron
chrI	12303	A	nlp-40	sense	intron
chrI	12315	T	nlp-40	sense	intron
chrI	1231640	T	Y48G8AL.1	sense	intron
chrI	12316	A	nlp-40	sense	intron
chrI	1233550	A	Y48G8AL.1	sense	intron
chrI	1233551	A	Y48G8AL.1	sense	intron
chrI	1235627	T	Y48G8AL.1	sense	intron
chrI	1236931	T	Y48G8AL.1	sense	intron
chrI	1236938	T	Y48G8AL.1	sense	intron
chrI	1237366	A	Y48G8AL.1	sense	intron
chrI	1237373	A	Y48G8AL.1	sense	intron
chrI	1239637	A	Y48G8AL.1	sense	coding
chrI	1241662	A	Y48G8AL.1	sense	intron
chrI	1243352	A	Y48G8AL.1	sense	intron
chrI	1243718	A	Y48G8AL.1	sense	intron
chrI	1243730	T	Y48G8AL.1	sense	intron
chrI	1244039	T	Y48G8AL.1	sense	intron
chrI	1244198	A	Y48G8AL.1	sense	intron
chrI	1244393	A	Y48G8AL.1	sense	intron
chrI	1244404	A	Y48G8AL.1	sense	intron
chrI	1244427	A	Y48G8AL.1	sense	intron
chrI	12445909	T	C54C8.2	sense	intron
chrI	1244953	T	Y48G8AL.1	sense	intron
chrI	1244960	A	Y48G8AL.1	sense	intron
chrI	1244972	A	Y48G8AL.1	sense	intron
chrI	1244982	T	Y48G8AL.1	sense	intron
chrI	1244993	A	Y48G8AL.1	sense	intron
chrI	1245017	A	Y48G8AL.1	sense	intron
chrI	1245134	A	Y48G8AL.1	sense	intron
chrI	1245450	A	Y48G8AL.1	sense	intron
chrI	1245461	A	Y48G8AL.1	sense	intron
chrI	1245471	A	Y48G8AL.1	sense	intron
chrI	1245472	A	Y48G8AL.1	sense	intron
chrI	1245478	A	Y48G8AL.1	sense	intron
chrI	1245575	T	Y48G8AL.1	sense	intron
chrI	1245576	T	Y48G8AL.1	sense	intron
chrI	1245585	T	Y48G8AL.1	sense	intron
chrI	1245586	A	Y48G8AL.1	sense	intron
chrI	1245587	A	Y48G8AL.1	sense	intron
chrI	1245592	A	Y48G8AL.1	sense	intron
chrI	1245601	T	Y48G8AL.1	sense	intron
chrI	1245647	A	Y48G8AL.1	sense	intron
chrI	1245662	T	Y48G8AL.1	sense	intron
chrI	1245663	T	Y48G8AL.1	sense	intron
chrI	1245664	A	Y48G8AL.1	sense	intron
chrI	1245671	T	Y48G8AL.1	sense	intron
chrI	1245672	A	Y48G8AL.1	sense	intron
chrI	1245675	A	Y48G8AL.1	sense	intron
chrI	1245680	T	Y48G8AL.1	sense	intron
chrI	1245682	A	Y48G8AL.1	sense	intron
chrI	1245686	T	Y48G8AL.1	sense	intron
chrI	1245691	T	Y48G8AL.1	sense	intron
chrI	1245693	A	Y48G8AL.1	sense	intron
chrI	1245695	A	Y48G8AL.1	sense	intron
chrI	1245701	T	Y48G8AL.1	sense	intron
chrI	1245704	A	Y48G8AL.1	sense	intron
chrI	1245706	A	Y48G8AL.1	sense	intron
chrI	1245710	T	Y48G8AL.1	sense	intron
chrI	1245714	T	Y48G8AL.1	sense	intron
chrI	1245715	A	Y48G8AL.1	sense	intron
chrI	1245716	A	Y48G8AL.1	sense	intron
chrI	1245727	T	Y48G8AL.1	sense	intron
chrI	1245731	T	Y48G8AL.1	sense	intron
chrI	1245740	T	Y48G8AL.1	sense	intron
chrI	1245741	A	Y48G8AL.1	sense	intron
chrI	1245742	A	Y48G8AL.1	sense	intron
chrI	1245752	T	Y48G8AL.1	sense	intron
chrI	1245755	A	Y48G8AL.1	sense	intron
chrI	1245756	A	Y48G8AL.1	sense	intron
chrI	1245763	T	Y48G8AL.1	sense	intron
chrI	1245765	A	Y48G8AL.1	sense	intron
chrI	1245774	A	Y48G8AL.1	sense	intron
chrI	1245775	A	Y48G8AL.1	sense	intron
chrI	1245778	T	Y48G8AL.1	sense	intron
chrI	1245787	T	Y48G8AL.1	sense	intron
chrI	12458546	T	C54C8.8	sense	3utr
chrI	1245861	A	Y48G8AL.1	sense	intron
chrI	1245870	A	Y48G8AL.1	sense	intron
chrI	1245883	A	Y48G8AL.1	sense	intron
chrI	1245886	T	Y48G8AL.1	sense	intron
chrI	1245938	A	Y48G8AL.1	sense	intron
chrI	1246128	T	Y48G8AL.1	sense	intron
chrI	1246129	T	Y48G8AL.1	sense	intron
chrI	1246151	T	Y48G8AL.1	sense	intron
chrI	1246152	A	Y48G8AL.1	sense	intron
chrI	1246155	A	Y48G8AL.1	sense	intron
chrI	12466156	A	ND	NA	intergenic
chrI	12466159	A	ND	NA	intergenic
chrI	12466161	A	ND	NA	intergenic
chrI	12466162	A	ND	NA	intergenic
chrI	12466258	T	ND	NA	intergenic
chrI	12466262	T	ND	NA	intergenic
chrI	12466439	T	ND	NA	intergenic
chrI	12466444	T	ND	NA	intergenic
chrI	12466604	A	ND	NA	intergenic
chrI	12466642	A	ND	NA	intergenic
chrI	12466659	A	ND	NA	intergenic
chrI	12466761	A	ND	NA	intergenic
chrI	12467089	A	ND	NA	intergenic
chrI	12467208	T	ND	NA	intergenic
chrI	12467598	A	ND	NA	intergenic
chrI	12467604	A	ND	NA	intergenic
chrI	12467723	T	ND	NA	intergenic
[truncated: 67,017 more rows]

## Sheet:  all non-repetitive sites
Chromosome name	Position in chromosome	Nucleotide changed	Gene name in region	Orientation of the gene	Position in gene
chrI	10020137	A	F10G8.1	sense	3utr
chrI	10020182	T	F10G8.1	sense	3utr
chrI	100762	A	Y48G1C.7	antisense	intron
chrI	10150393	A	F16C3.2	antisense	coding
chrI	10159700	T	F16C3.4	sense	intron
chrI	10178918	T	ND	NA	intergenic
chrI	10184017	A	ND	NA	intergenic
chrI	10184081	A	ND	NA	intergenic
chrI	10184096	A	ND	NA	intergenic
chrI	10184269	A	clec-87	antisense	3utr
chrI	10184331	A	clec-87	antisense	3utr
chrI	10260135	A	ZC247.2	antisense	coding
chrI	10320924	A	Y106G6G.6	antisense	coding
chrI	10326705	A	Y106G6G.2	antisense	coding
chrI	10356391	T	ZC434.9	sense	coding
chrI	10358833	A	ZC434.9	sense	intron
chrI	10382028	T	ND	NA	intergenic
chrI	10389147	T	mgl-2	antisense	coding
chrI	10439123	A	Y106G6H.5	antisense	intron
chrI	10439132	A	Y106G6H.5	antisense	coding
chrI	10439822	A	Y106G6H.5	antisense	intron
chrI	10455769	T	ND	NA	intergenic
chrI	10455770	T	ND	NA	intergenic
chrI	10455902	T	ND	NA	intergenic
chrI	10455925	T	ND	NA	intergenic
chrI	10456029	T	ND	NA	intergenic
chrI	10456054	T	ND	NA	intergenic
chrI	10456079	T	ND	NA	intergenic
chrI	10456098	T	ND	NA	intergenic
chrI	10456107	T	ND	NA	intergenic
chrI	10457315	T	ND	NA	intergenic
chrI	10457335	A	ND	NA	intergenic
chrI	10457343	T	ND	NA	intergenic
chrI	10457344	A	ND	NA	intergenic
chrI	10457363	A	ND	NA	intergenic
chrI	10457388	A	ND	NA	intergenic
chrI	10457413	A	ND	NA	intergenic
chrI	10457517	A	ND	NA	intergenic
chrI	10457540	A	ND	NA	intergenic
chrI	10457672	A	ND	NA	intergenic
chrI	10457673	A	ND	NA	intergenic
chrI	10471796	T	Y106G6H.13	sense	coding
chrI	10479583	A	mus-101	antisense	coding
chrI	10484193	T	mus-101	antisense	intron
chrI	10515424	A	che-13	antisense	coding
chrI	10523671	T	F59C6.2	sense	coding
chrI	10550585	A	ND	NA	intergenic
chrI	10550615	A	ND	NA	intergenic
chrI	10550779	A	ND	NA	intergenic
chrI	10550800	A	ND	NA	intergenic
chrI	10550801	A	ND	NA	intergenic
chrI	10553021	T	F25H2.4	sense	3utr
chrI	1058037	A	vps-4	antisense	intron
chrI	1058186	A	vps-4	antisense	intron
chrI	1058197	A	vps-4	antisense	intron
chrI	1058198	A	vps-4	antisense	intron
chrI	1058209	A	vps-4	antisense	intron
chrI	1058317	T	vps-4	antisense	intron
chrI	1058565	T	vps-4	antisense	intron
chrI	1058575	T	vps-4	antisense	intron
chrI	1058589	T	vps-4	antisense	intron
chrI	1058590	T	vps-4	antisense	intron
chrI	1058613	T	vps-4	antisense	intron
chrI	1058643	T	vps-4	antisense	intron
chrI	1061401	T	vps-4	antisense	intron
chrI	10630926	T	cutl-14	sense	coding
chrI	10639322	T	cdc-26	antisense	3utr
chrI	10678267	A	C34B2.6	antisense	intron
chrI	10701573	A	C34B2.9	antisense	intron
chrI	10717555	A	B0205.1	antisense	intron
chrI	10728894	A	B0205.8	antisense	3utr
chrI	10774429	A	daf-16	sense	intron
chrI	10774613	A	daf-16	sense	intron
chrI	10774626	A	daf-16	sense	intron
chrI	10774627	A	daf-16	sense	intron
chrI	10778688	T	ND	NA	intergenic
chrI	10778706	T	ND	NA	intergenic
chrI	10778767	T	ND	NA	intergenic
chrI	10778913	T	ND	NA	intergenic
chrI	10778947	T	ND	NA	intergenic
chrI	10779201	T	ND	NA	intergenic
chrI	10779389	T	ND	NA	intergenic
chrI	10779390	T	ND	NA	intergenic
chrI	10779903	T	ND	NA	intergenic
chrI	10780072	T	ND	NA	intergenic
chrI	10781145	T	ND	NA	intergenic
chrI	10781667	T	ND	NA	intergenic
chrI	10781668	T	ND	NA	intergenic
chrI	10781741	T	ND	NA	intergenic
chrI	10781758	T	ND	NA	intergenic
chrI	10781817	T	ND	NA	intergenic
chrI	10782279	A	F55A3.5	antisense	coding
chrI	10819184	A	ND	NA	intergenic
chrI	10819188	A	ND	NA	intergenic
chrI	10819196	A	ND	NA	intergenic
chrI	10819198	A	ND	NA	intergenic
chrI	10819211	A	ND	NA	intergenic
chrI	10819221	A	ND	NA	intergenic
chrI	10819224	A	ND	NA	intergenic
chrI	10819260	T	ND	NA	intergenic
chrI	10819268	A	ND	NA	intergenic
chrI	10819276	A	ND	NA	intergenic
chrI	10819296	A	ND	NA	intergenic
chrI	10819298	A	ND	NA	intergenic
chrI	10819302	T	ND	NA	intergenic
chrI	10819303	A	ND	NA	intergenic
chrI	10819315	T	ND	NA	intergenic
chrI	10819341	A	ND	NA	intergenic
chrI	10819343	A	ND	NA	intergenic
chrI	10819344	A	ND	NA	intergenic
chrI	10819350	A	ND	NA	intergenic
chrI	10819354	A	ND	NA	intergenic
chrI	10819374	A	ND	NA	intergenic
chrI	10819407	A	ND	NA	intergenic
chrI	10819419	A	ND	NA	intergenic
chrI	10819442	A	ND	NA	intergenic
chrI	10819443	A	ND	NA	intergenic
chrI	10819453	A	ND	NA	intergenic
chrI	10819462	A	ND	NA	intergenic
chrI	10819465	T	ND	NA	intergenic
chrI	10819469	A	ND	NA	intergenic
chrI	10819473	A	ND	NA	intergenic
chrI	10819485	A	ND	NA	intergenic
chrI	10819508	A	ND	NA	intergenic
chrI	10819533	A	ND	NA	intergenic
chrI	10819544	A	ND	NA	intergenic
chrI	10819554	A	ND	NA	intergenic
chrI	10819569	A	ND	NA	intergenic
chrI	10819573	A	ND	NA	intergenic
chrI	10819575	A	ND	NA	intergenic
chrI	10819585	A	ND	NA	intergenic
chrI	10819622	A	ND	NA	intergenic
chrI	10819625	A	ND	NA	intergenic
chrI	10819672	A	ND	NA	intergenic
chrI	10819682	A	ND	NA	intergenic
chrI	10819686	A	ND	NA	intergenic
chrI	10819687	A	ND	NA	intergenic
chrI	10819710	A	ND	NA	intergenic
chrI	10819717	A	ND	NA	intergenic
chrI	10819721	A	ND	NA	intergenic
chrI	10819726	A	ND	NA	intergenic
chrI	10819749	A	ND	NA	intergenic
chrI	10819759	A	ND	NA	intergenic
chrI	10819885	A	ND	NA	intergenic
chrI	10819900	A	ND	NA	intergenic
chrI	10819911	A	ND	NA	intergenic
chrI	10819987	A	ND	NA	intergenic
chrI	10819997	A	ND	NA	intergenic
chrI	10820001	A	ND	NA	intergenic
chrI	10820026	A	ND	NA	intergenic
chrI	10820039	A	ND	NA	intergenic
chrI	10820099	T	ND	NA	intergenic
chrI	10820103	A	ND	NA	intergenic
chrI	10820126	A	ND	NA	intergenic
chrI	10820127	A	ND	NA	intergenic
chrI	10820133	A	ND	NA	intergenic
chrI	10820140	A	ND	NA	intergenic
chrI	10820158	A	ND	NA	intergenic
chrI	10820170	A	ND	NA	intergenic
chrI	10820171	A	ND	NA	intergenic
chrI	10820180	A	ND	NA	intergenic
chrI	10820181	A	ND	NA	intergenic
chrI	10820196	T	ND	NA	intergenic
chrI	10820198	A	ND	NA	intergenic
chrI	10820204	A	ND	NA	intergenic
chrI	10820264	A	ND	NA	intergenic
chrI	10820275	A	ND	NA	intergenic
chrI	10820276	A	ND	NA	intergenic
chrI	10820281	A	ND	NA	intergenic
chrI	10820295	A	ND	NA	intergenic
chrI	10820302	A	ND	NA	intergenic
chrI	10820304	A	ND	NA	intergenic
chrI	10820349	T	ND	NA	intergenic
chrI	10820350	A	ND	NA	intergenic
chrI	10820353	A	ND	NA	intergenic
chrI	10820365	T	ND	NA	intergenic
chrI	10820366	A	ND	NA	intergenic
chrI	10820370	T	ND	NA	intergenic
chrI	10820371	T	ND	NA	intergenic
chrI	10820372	T	ND	NA	intergenic
chrI	10820380	T	ND	NA	intergenic
chrI	10820392	T	ND	NA	intergenic
chrI	10820400	T	ND	NA	intergenic
chrI	10820401	A	ND	NA	intergenic
chrI	10820402	A	ND	NA	intergenic
chrI	10820416	A	ND	NA	intergenic
chrI	10820442	A	ND	NA	intergenic
chrI	10820451	A	ND	NA	intergenic
chrI	10820462	A	ND	NA	intergenic
chrI	10820465	A	ND	NA	intergenic
chrI	10820486	T	ND	NA	intergenic
chrI	10820488	A	ND	NA	intergenic
chrI	10820499	A	ND	NA	intergenic
chrI	10820507	A	ND	NA	intergenic
chrI	10820508	A	ND	NA	intergenic
chrI	1086176	T	R06A10.1	sense	coding
chrI	10865041	A	ND	NA	intergenic
chrI	10939142	A	prp-17	sense	intron
chrI	10939146	A	prp-17	sense	intron
chrI	10939153	A	prp-17	sense	intron
chrI	10939175	A	prp-17	sense	intron
chrI	10939176	A	prp-17	sense	intron
chrI	10939385	A	prp-17	sense	intron
chrI	10939390	A	prp-17	sense	intron
chrI	10939400	A	prp-17	sense	intron
chrI	10944756	A	Y95D11A.1	sense	intron
chrI	10944995	A	Y95D11A.1	sense	intron
chrI	10945120	A	Y95D11A.1	sense	intron
chrI	10966406	A	Y52B11A.2	antisense	3utr
chrI	11011968	A	Y52B11A.13	antisense	5utr
chrI	11012190	T	Y52B11A.13	antisense	5utr
chrI	11012446	T	Y52B11A.13	antisense	5utr
chrI	1101300	T	ND	NA	intergenic
chrI	11013088	T	Y52B11A.12	sense	3utr
chrI	1101325	T	ND	NA	intergenic
chrI	1101326	T	ND	NA	intergenic
chrI	11013363	A	Y52B11A.12	sense	3utr
chrI	11043517	T	Y52B11A.10	sense	coding
chrI	11142475	T	clec-93	sense	intron
chrI	11165727	T	Y52B11C.1	antisense	intron
chrI	11165735	T	Y52B11C.1	antisense	intron
chrI	11165956	T	Y52B11C.1	antisense	intron
chrI	11211145	A	ztf-6	sense	intron
chrI	11224315	A	ND	NA	intergenic
chrI	11226819	A	nfya-2	sense	intron
chrI	11226825	A	nfya-2	sense	intron
chrI	11226829	A	nfya-2	sense	intron
chrI	11226898	A	nfya-2	sense	intron
chrI	11227639	A	nfya-2	sense	intron
chrI	11227693	A	nfya-2	sense	intron
chrI	11227694	A	nfya-2	sense	intron
chrI	11227699	A	nfya-2	sense	intron
chrI	11227707	A	nfya-2	sense	intron
chrI	11227825	A	nfya-2	sense	intron
chrI	11227905	A	nfya-2	sense	intron
chrI	11227915	A	nfya-2	sense	intron
chrI	11227920	A	nfya-2	sense	intron
chrI	11228025	A	nfya-2	sense	intron
chrI	11228030	A	nfya-2	sense	intron
chrI	11228035	A	nfya-2	sense	intron
chrI	11228276	T	nfya-2	sense	intron
chrI	11229702	A	nfya-2	sense	intron
chrI	11229720	T	nfya-2	sense	intron
chrI	11229732	A	nfya-2	sense	intron
chrI	11229735	A	nfya-2	sense	intron
chrI	11230707	T	nfya-2	sense	intron
chrI	11230710	T	nfya-2	sense	intron
chrI	11230722	A	nfya-2	sense	intron
chrI	11230740	T	nfya-2	sense	intron
chrI	11231399	A	nfya-2	sense	intron
chrI	11231405	A	nfya-2	sense	intron
chrI	11231558	A	nfya-2	sense	intron
chrI	11231592	A	nfya-2	sense	intron
chrI	11231949	A	nfya-2	sense	intron
chrI	11231973	A	nfya-2	sense	intron
chrI	11232012	A	nfya-2	sense	intron
chrI	11232033	A	nfya-2	sense	intron
chrI	11232069	A	nfya-2	sense	intron
chrI	11232160	A	nfya-2	sense	intron
chrI	11232374	A	nfya-2	sense	intron
chrI	11232375	A	nfya-2	sense	intron
chrI	11232415	A	nfya-2	sense	intron
chrI	11232427	A	nfya-2	sense	intron
chrI	11232437	A	nfya-2	sense	intron
chrI	11232474	A	nfya-2	sense	intron
chrI	11255000	T	scrm-6	sense	coding
chrI	11259815	A	ND	NA	intergenic
chrI	11300748	T	Y53H1B.4	sense	coding
chrI	11300749	T	Y53H1B.4	sense	coding
chrI	11301247	T	Y53H1B.4	sense	coding
chrI	11301271	A	Y53H1B.4	sense	coding
chrI	11303556	A	ND	NA	intergenic
chrI	11309767	T	H25P06.4	antisense	intron
chrI	11325490	A	cdk-9	sense	intron
chrI	11335810	A	M04D5.1	sense	3utr
chrI	11337679	A	ND	NA	intergenic
chrI	11337695	A	ND	NA	intergenic
chrI	11337705	A	ND	NA	intergenic
chrI	11337850	A	ND	NA	intergenic
chrI	11337851	A	ND	NA	intergenic
chrI	11337867	A	ND	NA	intergenic
chrI	113421	T	F53G12.13	sense	intron
chrI	113424	A	F53G12.13	sense	intron
chrI	1138365	T	Y48G8AL.9	antisense	intron
chrI	1138381	T	Y48G8AL.9	antisense	intron
chrI	1138388	T	Y48G8AL.9	antisense	intron
chrI	1138548	T	Y48G8AL.9	antisense	intron
chrI	1138549	T	Y48G8AL.9	antisense	intron
chrI	1138553	T	Y48G8AL.9	antisense	intron
chrI	1138558	T	Y48G8AL.9	antisense	intron
chrI	1138567	T	Y48G8AL.9	antisense	intron
chrI	1138909	A	Y48G8AL.9	antisense	intron
chrI	1138910	A	Y48G8AL.9	antisense	intron
chrI	1138911	A	Y48G8AL.9	antisense	intron
chrI	1138912	A	Y48G8AL.9	antisense	intron
chrI	1139274	T	Y48G8AL.9	antisense	intron
chrI	1140001	T	Y48G8AL.9	antisense	intron
chrI	1140002	T	Y48G8AL.9	antisense	intron
chrI	11435024	T	nhr-73	antisense	coding
chrI	11435274	A	nhr-73	antisense	intron
chrI	11459043	A	ZK1025.4	antisense	coding
chrI	11459044	A	ZK1025.4	antisense	coding
chrI	11478740	T	nhr-245	sense	intron
chrI	11478990	A	nhr-245	sense	coding
chrI	1148565	T	Y48G8AL.10	antisense	intron
chrI	11487061	A	K08C9.2	antisense	coding
chrI	1149120	T	Y48G8AL.10	antisense	intron
chrI	1149126	T	Y48G8AL.10	antisense	intron
chrI	11493929	T	K08C9.8	antisense	5utr
chrI	11502551	T	F32B4.8	sense	coding
chrI	1154648	T	ND	NA	intergenic
chrI	1154659	T	ND	NA	intergenic
chrI	1154704	T	ND	NA	intergenic
chrI	1154749	T	ND	NA	intergenic
chrI	1154772	T	ND	NA	intergenic
chrI	1154773	T	ND	NA	intergenic
chrI	1154849	T	ND	NA	intergenic
chrI	1154864	T	ND	NA	intergenic
chrI	1154873	T	ND	NA	intergenic
chrI	1154882	T	ND	NA	intergenic
chrI	1154903	T	ND	NA	intergenic
chrI	1154926	T	ND	NA	intergenic
chrI	1154940	T	ND	NA	intergenic
chrI	1154941	T	ND	NA	intergenic
chrI	1154950	T	ND	NA	intergenic
chrI	1154999	T	ND	NA	intergenic
chrI	1155058	T	ND	NA	intergenic
chrI	1155060	T	ND	NA	intergenic
chrI	1155083	T	ND	NA	intergenic
chrI	1155113	T	ND	NA	intergenic
chrI	1155172	T	ND	NA	intergenic
chrI	1155196	T	ND	NA	intergenic
chrI	1155197	T	ND	NA	intergenic
chrI	1155235	T	ND	NA	intergenic
chrI	11574508	A	F15D3.6	antisense	intron
chrI	11595781	A	unc-75	sense	intron
chrI	11600106	A	unc-75	sense	intron
chrI	11603046	A	ND	NA	intergenic
chrI	11603047	A	ND	NA	intergenic
chrI	11603059	A	ND	NA	intergenic
chrI	11603113	A	ND	NA	intergenic
chrI	11603141	A	ND	NA	intergenic
chrI	11603151	A	ND	NA	intergenic
chrI	11603302	A	ND	NA	intergenic
chrI	11603339	A	ND	NA	intergenic
chrI	11603340	A	ND	NA	intergenic
chrI	11603425	A	ND	NA	intergenic
chrI	11603427	A	ND	NA	intergenic
chrI	11603435	A	ND	NA	intergenic
chrI	11603445	A	ND	NA	intergenic
chrI	11603472	A	ND	NA	intergenic
chrI	11603473	A	ND	NA	intergenic
chrI	11603640	A	ND	NA	intergenic
chrI	11603641	A	ND	NA	intergenic
chrI	11603746	A	ND	NA	intergenic
chrI	11604347	T	ND	NA	intergenic
chrI	11604443	T	ND	NA	intergenic
chrI	11605820	T	C17D12.7	antisense	intron
chrI	11606007	T	C17D12.7	antisense	intron
chrI	11606008	T	C17D12.7	antisense	intron
chrI	1161570	A	Y48G8AL.7	sense	intron
chrI	11616745	A	ND	NA	intergenic
chrI	1161680	A	Y48G8AL.7	sense	intron
chrI	11620044	T	C17D12.3	antisense	coding
chrI	11623316	A	Y47H9A.1	sense	coding
chrI	11626615	T	ND	NA	intergenic
chrI	1162875	T	Y48G8AL.7	sense	coding
chrI	1164065	T	haf-6	antisense	intron
chrI	1165001	T	haf-6	antisense	intron
chrI	1165247	T	haf-6	antisense	intron
chrI	11682955	T	ND	NA	intergenic
chrI	1168323	T	haf-6	antisense	intron
chrI	1168337	T	haf-6	antisense	intron
chrI	1168338	T	haf-6	antisense	intron
chrI	1168378	T	haf-6	antisense	intron
chrI	1168516	T	haf-6	antisense	intron
chrI	11686114	A	ND	NA	intergenic
chrI	1168618	T	haf-6	antisense	intron
chrI	11686314	A	ND	NA	intergenic
chrI	11689017	A	scrm-1	antisense	intron
chrI	11700236	T	sri-12	sense	coding
chrI	11724242	A	F35E2.9	antisense	coding
chrI	1174575	T	haf-6	antisense	intron
chrI	11801651	A	T02G6.2	antisense	coding
chrI	11831912	A	Y47H9C.1	antisense	intron
chrI	11846339	A	dhhc-2	sense	intron
chrI	11846342	A	dhhc-2	sense	intron
chrI	11846486	A	dhhc-2	sense	intron
chrI	11846491	A	dhhc-2	sense	intron
chrI	11849108	T	dhhc-2	sense	coding
chrI	11882826	A	dnj-27	sense	intron
chrI	11882827	A	dnj-27	sense	intron
chrI	11891198	T	ND	NA	intergenic
chrI	1189947	T	smg-2	sense	intron
chrI	11905142	T	ND	NA	intergenic
chrI	11922898	T	fdps-1	antisense	intron
chrI	11924689	T	ND	NA	intergenic
chrI	11924690	T	ND	NA	intergenic
chrI	11924714	T	ND	NA	intergenic
chrI	11924725	T	ND	NA	intergenic
chrI	11924781	T	wve-1	antisense	3utr
chrI	11924782	T	wve-1	antisense	3utr
chrI	11924840	T	wve-1	antisense	intron
chrI	11924969	T	wve-1	antisense	intron
chrI	11925190	T	wve-1	antisense	3utr
chrI	11928063	T	wve-1	antisense	intron
chrI	1197885	T	Y48G8AL.5	sense	intron
chrI	1198095	T	Y48G8AL.5	sense	intron
chrI	1198096	T	Y48G8AL.5	sense	intron
chrI	1198262	T	Y48G8AL.5	sense	intron
chrI	1198284	A	Y48G8AL.5	sense	intron
chrI	12008563	A	ND	NA	intergenic
chrI	12010920	A	ND	NA	intergenic
chrI	1201491	A	Y48G8AL.5	sense	intron
chrI	1202803	T	Y48G8AL.5	sense	intron
chrI	12048522	A	ksr-2	antisense	intron
chrI	12048541	A	ksr-2	antisense	intron
chrI	12048630	A	ksr-2	antisense	intron
chrI	12048770	T	ksr-2	antisense	intron
chrI	12048923	A	ksr-2	antisense	intron
chrI	12049017	A	ksr-2	antisense	intron
chrI	12049075	A	ksr-2	antisense	intron
chrI	12049083	T	ksr-2	antisense	intron
chrI	12049096	T	ksr-2	antisense	intron
chrI	12049102	A	ksr-2	antisense	intron
chrI	12049561	T	ksr-2	antisense	intron
chrI	12049562	T	ksr-2	antisense	intron
chrI	12049563	A	ksr-2	antisense	intron
chrI	12049593	T	ksr-2	antisense	intron
chrI	12049605	A	ksr-2	antisense	intron
chrI	12049616	A	ksr-2	antisense	intron
chrI	12049665	T	ksr-2	antisense	intron
chrI	12049688	A	ksr-2	antisense	intron
chrI	12049755	A	ksr-2	antisense	intron
chrI	12049818	A	ksr-2	antisense	intron
chrI	12049819	A	ksr-2	antisense	intron
chrI	12049826	A	ksr-2	antisense	intron
chrI	12049865	A	ksr-2	antisense	intron
chrI	12049866	A	ksr-2	antisense	intron
chrI	12049893	A	ksr-2	antisense	intron
chrI	12061100	T	hrp-2	antisense	intron
chrI	12061304	T	hrp-2	antisense	intron
chrI	12061305	T	hrp-2	antisense	intron
chrI	12061393	T	hrp-2	antisense	intron
chrI	12062545	T	hrp-2	antisense	intron
chrI	12066446	A	F58D5.2	antisense	intron
chrI	12067199	A	F58D5.2	antisense	intron
chrI	12067203	A	F58D5.2	antisense	intron
chrI	12067215	A	F58D5.2	antisense	intron
chrI	12067226	A	F58D5.2	antisense	intron
chrI	12067227	A	F58D5.2	antisense	intron
chrI	12067230	A	F58D5.2	antisense	intron
chrI	12067237	A	F58D5.2	antisense	intron
chrI	12067486	T	F58D5.2	antisense	intron
chrI	12067497	T	F58D5.2	antisense	intron
chrI	1206861	A	Y48G8AL.5	sense	intron
chrI	1206862	A	Y48G8AL.5	sense	intron
chrI	12102632	A	rrf-2	antisense	coding
chrI	12108723	T	ND	NA	intergenic
chrI	12192794	A	ND	NA	intergenic
chrI	12192795	A	ND	NA	intergenic
chrI	12218460	A	F14B6.2	antisense	3utr
chrI	12218677	A	F14B6.2	antisense	coding
chrI	12221058	A	F14B6.2	antisense	coding
chrI	1236938	T	Y48G8AL.1	sense	intron
chrI	1237366	A	Y48G8AL.1	sense	intron
chrI	1239637	A	Y48G8AL.1	sense	coding
chrI	1243499	A	Y48G8AL.1	sense	intron
chrI	1243500	A	Y48G8AL.1	sense	intron
chrI	1243718	A	Y48G8AL.1	sense	intron
chrI	1243730	T	Y48G8AL.1	sense	intron
chrI	1245017	A	Y48G8AL.1	sense	intron
chrI	1245671	T	Y48G8AL.1	sense	intron
chrI	1245756	A	Y48G8AL.1	sense	intron
chrI	12479139	T	ND	NA	intergenic
chrI	1249763	A	Y48G8AL.1	sense	intron
chrI	1249768	A	Y48G8AL.1	sense	intron
chrI	1249769	A	Y48G8AL.1	sense	intron
chrI	1249784	A	Y48G8AL.1	sense	intron
chrI	1249794	A	Y48G8AL.1	sense	intron
chrI	1249983	T	Y48G8AL.1	sense	intron
chrI	1249996	T	Y48G8AL.1	sense	intron
chrI	1250019	T	Y48G8AL.1	sense	intron
chrI	12518526	T	K11D2.5	sense	3utr
chrI	1252603	A	Y48G8AL.1	sense	intron
chrI	1252606	A	Y48G8AL.1	sense	intron
chrI	1252616	T	Y48G8AL.1	sense	intron
chrI	1252621	T	Y48G8AL.1	sense	intron
chrI	1252739	T	Y48G8AL.1	sense	intron
chrI	1252824	T	Y48G8AL.1	sense	intron
chrI	1252887	T	Y48G8AL.1	sense	intron
chrI	1252927	T	Y48G8AL.1	sense	intron
chrI	1252932	T	Y48G8AL.1	sense	intron
chrI	12529915	T	pri-2	antisense	intron
chrI	1253007	A	Y48G8AL.1	sense	intron
chrI	1253092	A	Y48G8AL.1	sense	intron
chrI	1253097	A	Y48G8AL.1	sense	intron
chrI	1253107	T	Y48G8AL.1	sense	intron
chrI	1253798	A	Y48G8AL.1	sense	intron
chrI	1253812	T	Y48G8AL.1	sense	intron
chrI	1253837	T	Y48G8AL.1	sense	intron
chrI	1253856	A	Y48G8AL.1	sense	intron
chrI	1253858	T	Y48G8AL.1	sense	intron
chrI	1253867	T	Y48G8AL.1	sense	intron
chrI	1253868	T	Y48G8AL.1	sense	intron
chrI	1253884	T	Y48G8AL.1	sense	intron
chrI	1253901	T	Y48G8AL.1	sense	intron
chrI	1253989	T	Y48G8AL.1	sense	intron
chrI	1254019	A	Y48G8AL.1	sense	intron
chrI	1254185	T	Y48G8AL.1	sense	intron
chrI	1254207	T	Y48G8AL.1	sense	intron
chrI	1254221	A	Y48G8AL.1	sense	intron
chrI	1254306	T	Y48G8AL.1	sense	intron
chrI	1254307	T	Y48G8AL.1	sense	intron
chrI	12583597	A	F33E2.4	sense	intron
chrI	12583625	T	F33E2.4	sense	intron
chrI	12583628	T	F33E2.4	sense	intron
chrI	12583641	T	F33E2.4	sense	intron
chrI	12583642	T	F33E2.4	sense	intron
chrI	12583699	T	F33E2.4	sense	intron
chrI	1258893	T	ND	NA	intergenic
chrI	1258904	T	ND	NA	intergenic
chrI	1258914	T	ND	NA	intergenic
chrI	1258924	T	ND	NA	intergenic
chrI	1258948	T	ND	NA	intergenic
chrI	1258961	T	ND	NA	intergenic
chrI	1258962	T	ND	NA	intergenic
chrI	1258971	T	ND	NA	intergenic
chrI	1258977	T	ND	NA	intergenic
chrI	1258978	T	ND	NA	intergenic
chrI	1259016	T	ND	NA	intergenic
chrI	1259018	T	ND	NA	intergenic
chrI	1259040	T	ND	NA	intergenic
chrI	1259067	T	ND	NA	intergenic
chrI	1259077	T	ND	NA	intergenic
chrI	1259086	T	ND	NA	intergenic
chrI	1259096	T	ND	NA	intergenic
chrI	1259097	T	ND	NA	intergenic
chrI	1259105	T	ND	NA	intergenic
chrI	1259106	T	ND	NA	intergenic
chrI	1259109	T	ND	NA	intergenic
chrI	1259110	T	ND	NA	intergenic
chrI	1259129	T	ND	NA	intergenic
chrI	1259179	T	ND	NA	intergenic
chrI	1259180	T	ND	NA	intergenic
chrI	1259190	T	ND	NA	intergenic
chrI	1259191	T	ND	NA	intergenic
chrI	1259213	T	ND	NA	intergenic
chrI	1259228	T	ND	NA	intergenic
chrI	1259233	T	ND	NA	intergenic
chrI	1259240	T	ND	NA	intergenic
chrI	1259262	T	ND	NA	intergenic
chrI	1259286	T	ND	NA	intergenic
chrI	1259288	A	ND	NA	intergenic
chrI	1259296	T	ND	NA	intergenic
chrI	1259305	T	ND	NA	intergenic
chrI	1259336	T	ND	NA	intergenic
chrI	1259363	A	ND	NA	intergenic
chrI	1259375	A	ND	NA	intergenic
chrI	1259387	A	ND	NA	intergenic
chrI	1259442	T	ND	NA	intergenic
chrI	1260294	T	grh-1	antisense	intron
chrI	1260410	T	grh-1	antisense	intron
chrI	1260718	T	grh-1	antisense	intron
chrI	1262014	T	grh-1	antisense	intron
chrI	1262015	T	grh-1	antisense	intron
chrI	12621311	T	T07D10.2	sense	intron
chrI	1262167	T	grh-1	antisense	intron
chrI	12632157	A	clec-15	antisense	coding
chrI	12635550	T	clec-13	sense	coding
chrI	12663920	A	ND	NA	intergenic
chrI	12664181	A	ND	NA	intergenic
chrI	12671557	A	par-6	sense	intron
chrI	12680915	T	ndx-1	sense	coding
chrI	1272583	T	ND	NA	intergenic
chrI	12730090	A	W02A11.1	antisense	coding
chrI	12735322	T	vps-25	antisense	intron
chrI	12735323	T	vps-25	antisense	intron
chrI	12735588	T	vps-25	antisense	intron
chrI	12735690	T	vps-25	antisense	intron
chrI	12742933	A	uba-2	sense	intron
chrI	12743054	A	uba-2	sense	intron
chrI	12743055	A	uba-2	sense	intron
chrI	12748765	A	ND	NA	intergenic
chrI	12748882	A	ND	NA	intergenic
chrI	12748891	A	ND	NA	intergenic
chrI	12748909	A	ND	NA	intergenic
chrI	12749021	A	ND	NA	intergenic
chrI	12749131	A	ND	NA	intergenic
chrI	12749132	A	ND	NA	intergenic
chrI	12752932	A	ND	NA	intergenic
chrI	12753177	A	ND	NA	intergenic
chrI	12753179	A	ND	NA	intergenic
chrI	12753203	A	ND	NA	intergenic
chrI	12753206	A	ND	NA	intergenic
chrI	12754994	T	W02A11.6	sense	3utr
chrI	12787985	A	Y18D10A.1	antisense	3utr
chrI	12809442	T	ND	NA	intergenic
chrI	12809476	T	ND	NA	intergenic
chrI	12809477	T	ND	NA	intergenic
chrI	12809478	T	ND	NA	intergenic
chrI	12809479	T	ND	NA	intergenic
chrI	12809486	T	ND	NA	intergenic
chrI	12809487	T	ND	NA	intergenic
chrI	12809589	T	ND	NA	intergenic
chrI	12809590	T	ND	NA	intergenic
chrI	12809592	T	ND	NA	intergenic
chrI	12809593	T	ND	NA	intergenic
chrI	12809605	T	ND	NA	intergenic
chrI	12809606	T	ND	NA	intergenic
chrI	12809618	A	ND	NA	intergenic
chrI	12809624	T	ND	NA	intergenic
chrI	12809626	T	ND	NA	intergenic
chrI	12809629	A	ND	NA	intergenic
chrI	12809635	T	ND	NA	intergenic
chrI	12809636	T	ND	NA	intergenic
chrI	12809639	A	ND	NA	intergenic
chrI	12809641	T	ND	NA	intergenic
chrI	12809642	T	ND	NA	intergenic
chrI	12809643	T	ND	NA	intergenic
chrI	12809650	T	ND	NA	intergenic
chrI	12809652	T	ND	NA	intergenic
chrI	12809654	A	ND	NA	intergenic
chrI	12809657	T	ND	NA	intergenic
chrI	12809678	T	ND	NA	intergenic
chrI	12809679	T	ND	NA	intergenic
chrI	12809687	T	ND	NA	intergenic
chrI	12809688	T	ND	NA	intergenic
chrI	12809690	T	ND	NA	intergenic
chrI	12809711	T	ND	NA	intergenic
chrI	12809715	T	ND	NA	intergenic
chrI	12809729	T	ND	NA	intergenic
chrI	12809738	T	ND	NA	intergenic
chrI	12809744	T	ND	NA	intergenic
chrI	12809752	T	ND	NA	intergenic
chrI	12809754	T	ND	NA	intergenic
chrI	12809755	T	ND	NA	intergenic
chrI	12809797	T	ND	NA	intergenic
chrI	12809803	T	ND	NA	intergenic
chrI	12809806	A	ND	NA	intergenic
chrI	12809807	T	ND	NA	intergenic
chrI	12809809	T	ND	NA	intergenic
chrI	12809812	T	ND	NA	intergenic
chrI	12809813	T	ND	NA	intergenic
chrI	12809819	A	ND	NA	intergenic
chrI	12809822	T	ND	NA	intergenic
chrI	12809832	T	ND	NA	intergenic
chrI	12809833	A	ND	NA	intergenic
chrI	12809847	T	ND	NA	intergenic
chrI	12809851	T	ND	NA	intergenic
chrI	12809852	T	ND	NA	intergenic
chrI	12809855	T	ND	NA	intergenic
chrI	12809875	T	ND	NA	intergenic
chrI	12809887	A	ND	NA	intergenic
chrI	12809890	T	ND	NA	intergenic
chrI	12809892	A	ND	NA	intergenic
chrI	12809895	T	ND	NA	intergenic
chrI	12809901	A	ND	NA	intergenic
chrI	12809902	A	ND	NA	intergenic
chrI	12809903	A	ND	NA	intergenic
chrI	12809905	T	ND	NA	intergenic
chrI	12809915	T	ND	NA	intergenic
chrI	12809916	T	ND	NA	intergenic
chrI	12809918	A	ND	NA	intergenic
chrI	12809920	A	ND	NA	intergenic
chrI	12809926	T	ND	NA	intergenic
chrI	12809941	T	ND	NA	intergenic
chrI	12809950	T	ND	NA	intergenic
chrI	12809962	T	ND	NA	intergenic
chrI	12809963	T	ND	NA	intergenic
chrI	12809967	T	ND	NA	intergenic
chrI	12809972	T	ND	NA	intergenic
chrI	12809973	T	ND	NA	intergenic
chrI	12809976	T	ND	NA	intergenic
chrI	12809991	T	ND	NA	intergenic
chrI	12810088	T	ND	NA	intergenic
chrI	12810092	T	ND	NA	intergenic
chrI	12810093	T	ND	NA	intergenic
chrI	12810094	T	ND	NA	intergenic
chrI	12810099	T	ND	NA	intergenic
chrI	12810117	T	ND	NA	intergenic
chrI	12810118	T	ND	NA	intergenic
chrI	12824264	T	gsk-3	sense	intron
chrI	12833771	T	nhx-8	sense	3utr
chrI	12852135	A	Y18D10A.8	sense	intron
chrI	12854733	T	Y18D10A.9	antisense	intron
chrI	12854734	T	Y18D10A.9	antisense	intron
chrI	12854737	T	Y18D10A.9	antisense	intron
chrI	12854847	T	Y18D10A.9	antisense	intron
chrI	12854848	T	Y18D10A.9	antisense	intron
chrI	12882792	A	pad-1	sense	intron
chrI	12924818	A	ND	NA	intergenic
chrI	12924825	A	ND	NA	intergenic
chrI	12924844	T	ND	NA	intergenic
chrI	12924867	T	ND	NA	intergenic
chrI	12924950	T	ND	NA	intergenic
chrI	12924954	T	ND	NA	intergenic
chrI	12924975	T	ND	NA	intergenic
chrI	12925091	A	ND	NA	intergenic
chrI	12925194	T	ND	NA	intergenic
chrI	12925206	A	ND	NA	intergenic
chrI	12925211	A	ND	NA	intergenic
chrI	12926337	T	ND	NA	intergenic
chrI	12926342	T	ND	NA	intergenic
chrI	12926354	A	ND	NA	intergenic
chrI	12926457	T	ND	NA	intergenic
chrI	12926573	A	ND	NA	intergenic
chrI	12926594	A	ND	NA	intergenic
chrI	12926598	A	ND	NA	intergenic
chrI	12926681	A	ND	NA	intergenic
chrI	12926704	A	ND	NA	intergenic
chrI	12926723	T	ND	NA	intergenic
chrI	12926730	T	ND	NA	intergenic
chrI	12927347	A	ND	NA	intergenic
chrI	12927348	A	ND	NA	intergenic
chrI	12932228	T	Y18D10A.22	sense	coding
chrI	12944212	T	F08A8.2	sense	intron
chrI	12974651	A	gale-1	sense	intron
chrI	13014914	T	pmr-1	sense	intron
chrI	13014915	T	pmr-1	sense	intron
chrI	13138299	A	C17H1.7	antisense	intron
chrI	13146285	T	F22G12.8	sense	coding
chrI	13159629	T	F22G12.4	antisense	intron
chrI	13159630	A	F22G12.4	antisense	intron
chrI	13163145	T	F22G12.5	sense	intron
chrI	13163146	T	F22G12.5	sense	intron
chrI	13163394	T	F22G12.5	sense	intron
chrI	13163399	T	F22G12.5	sense	intron
chrI	13163410	T	F22G12.5	sense	intron
chrI	13282926	T	M01E5.3	antisense	intron
chrI	13283327	T	M01E5.3	antisense	intron
chrI	13283329	T	M01E5.3	antisense	intron
chrI	1332775	T	K12C11.5	sense	intron
chrI	13336413	T	ND	NA	intergenic
chrI	13336414	T	ND	NA	intergenic
chrI	13360269	T	ND	NA	intergenic
chrI	13360390	A	ND	NA	intergenic
chrI	13360416	T	ND	NA	intergenic
chrI	13360420	T	ND	NA	intergenic
chrI	13362007	T	sptf-3	antisense	intron
chrI	13362031	T	sptf-3	antisense	intron
chrI	13362032	T	sptf-3	antisense	intron
chrI	13362193	T	sptf-3	antisense	intron
chrI	13362199	T	sptf-3	antisense	intron
chrI	13362995	T	sptf-3	antisense	intron
chrI	13362996	T	sptf-3	antisense	intron
chrI	13369970	T	ND	NA	intergenic
chrI	13387059	T	C01A2.5	sense	3utr
chrI	13393982	T	C01A2.4	sense	3utr
chrI	13403284	T	nlp-38	sense	coding
chrI	13403941	T	nlp-38	sense	3utr
chrI	13413455	A	ND	NA	intergenic
chrI	13413456	A	ND	NA	intergenic
chrI	13413477	A	ND	NA	intergenic
chrI	13413560	A	ND	NA	intergenic
chrI	13417749	A	ND	NA	intergenic
chrI	13417767	A	ND	NA	intergenic
chrI	13423333	T	W05H12.1	sense	3utr
chrI	13426388	T	ND	NA	intergenic
chrI	134265	T	mex-3	sense	3utr
chrI	13447367	A	spr-5	sense	intron
chrI	13447377	T	spr-5	sense	intron
chrI	13447379	A	spr-5	sense	intron
chrI	13447384	T	spr-5	sense	intron
chrI	13448388	A	spr-5	sense	intron
chrI	13448393	T	spr-5	sense	intron
chrI	13448395	A	spr-5	sense	intron
chrI	13448405	T	spr-5	sense	intron
chrI	13451531	T	Y48G10A.6	sense	5utr
chrI	1347018	T	ND	NA	intergenic
chrI	1347022	T	ND	NA	intergenic
chrI	1347092	T	ND	NA	intergenic
chrI	1347102	T	ND	NA	intergenic
chrI	1347103	T	ND	NA	intergenic
chrI	1347104	T	ND	NA	intergenic
chrI	1347109	T	ND	NA	intergenic
chrI	1347110	T	ND	NA	intergenic
chrI	1347111	T	ND	NA	intergenic
chrI	1347119	T	ND	NA	intergenic
chrI	1347120	T	ND	NA	intergenic
chrI	1347131	T	ND	NA	intergenic
chrI	1347138	T	ND	NA	intergenic
chrI	1347140	T	ND	NA	intergenic
chrI	1347145	T	ND	NA	intergenic
chrI	1347147	T	ND	NA	intergenic
chrI	1347217	T	ND	NA	intergenic
chrI	1347218	T	ND	NA	intergenic
chrI	1347230	T	ND	NA	intergenic
chrI	1347231	T	ND	NA	intergenic
chrI	1347233	T	ND	NA	intergenic
chrI	1347260	T	ND	NA	intergenic
chrI	1347261	T	ND	NA	intergenic
chrI	1347266	T	ND	NA	intergenic
chrI	1347591	T	ND	NA	intergenic
chrI	1347592	T	ND	NA	intergenic
chrI	1347593	T	ND	NA	intergenic
chrI	1347601	T	ND	NA	intergenic
chrI	1347602	T	ND	NA	intergenic
chrI	1347606	T	ND	NA	intergenic
chrI	1347607	T	ND	NA	intergenic
chrI	1347608	T	ND	NA	intergenic
chrI	1347616	T	ND	NA	intergenic
chrI	1347617	T	ND	NA	intergenic
chrI	1347623	T	ND	NA	intergenic
chrI	1347677	T	ND	NA	intergenic
chrI	1347685	T	ND	NA	intergenic
chrI	1347686	T	ND	NA	intergenic
chrI	1347688	T	ND	NA	intergenic
chrI	1347715	T	ND	NA	intergenic
chrI	1347716	T	ND	NA	intergenic
chrI	1347727	T	ND	NA	intergenic
chrI	1347825	T	ND	NA	intergenic
chrI	1347849	T	ND	NA	intergenic
chrI	1347856	T	ND	NA	intergenic
chrI	1347933	A	ND	NA	intergenic
chrI	1347934	A	ND	NA	intergenic
chrI	1347935	A	ND	NA	intergenic
chrI	1347944	A	ND	NA	intergenic
chrI	1347946	A	ND	NA	intergenic
chrI	1347955	A	ND	NA	intergenic
chrI	1347964	A	ND	NA	intergenic
chrI	1347966	T	ND	NA	intergenic
chrI	1347980	T	ND	NA	intergenic
chrI	1347981	A	ND	NA	intergenic
chrI	1347982	A	ND	NA	intergenic
chrI	13481041	T	Y48G10A.2	antisense	intron
chrI	13481172	A	Y48G10A.2	antisense	intron
chrI	13481208	A	Y48G10A.2	antisense	intron
chrI	13482696	A	Y48G10A.2	antisense	intron
chrI	13482870	A	Y48G10A.2	antisense	intron
chrI	13483453	T	Y48G10A.2	antisense	intron
chrI	13484651	A	Y48G10A.2	antisense	intron
chrI	13484696	A	Y48G10A.2	antisense	intron
chrI	13484777	T	Y48G10A.2	antisense	intron
chrI	13484800	A	Y48G10A.2	antisense	intron
chrI	13484801	A	Y48G10A.2	antisense	intron
chrI	13484965	A	Y48G10A.2	antisense	intron
chrI	13485100	A	Y48G10A.2	antisense	intron
chrI	13485101	A	Y48G10A.2	antisense	intron
chrI	13485814	A	Y48G10A.2	antisense	intron
chrI	13485836	A	Y48G10A.2	antisense	intron
chrI	13485929	A	Y48G10A.2	antisense	intron
chrI	13485977	A	Y48G10A.2	antisense	intron
chrI	13486077	A	Y48G10A.2	antisense	intron
chrI	13486126	A	Y48G10A.2	antisense	intron
chrI	13486148	A	Y48G10A.2	antisense	intron
chrI	13486155	A	Y48G10A.2	antisense	intron
chrI	13486358	A	Y48G10A.2	antisense	intron
chrI	13486415	T	Y48G10A.2	antisense	intron
chrI	13486477	A	Y48G10A.2	antisense	intron
chrI	13486665	A	Y48G10A.2	antisense	intron
chrI	13486670	A	Y48G10A.2	antisense	intron
chrI	13486689	A	Y48G10A.2	antisense	intron
chrI	13486880	T	Y48G10A.2	antisense	intron
chrI	13486887	T	Y48G10A.2	antisense	intron
chrI	13486909	T	Y48G10A.2	antisense	intron
chrI	1349042	T	Y92H12BL.1	sense	intron
chrI	1349050	T	Y92H12BL.1	sense	intron
chrI	1349251	T	Y92H12BL.1	sense	intron
chrI	13497009	T	ND	NA	intergenic
chrI	13497934	T	ND	NA	intergenic
chrI	1350456	T	Y92H12BL.1	sense	intron
chrI	13558886	T	vars-2	antisense	intron
chrI	13558949	T	vars-2	antisense	intron
chrI	13558954	T	vars-2	antisense	intron
chrI	13559028	A	vars-2	antisense	intron
chrI	13562054	T	Y87G2A.16	sense	intron
chrI	1356766	T	Y92H12BL.1	sense	intron
chrI	1357529	A	Y92H12BL.1	sense	intron
chrI	13580668	A	gpi-1	sense	intron
chrI	13583295	A	ubc-14	sense	intron
chrI	13583609	A	ubc-14	sense	intron
chrI	13583632	A	ubc-14	sense	intron
chrI	13584038	A	ubc-14	sense	intron
chrI	13584065	A	ubc-14	sense	intron
chrI	13584136	A	ubc-14	sense	intron
chrI	13584141	A	ubc-14	sense	intron
chrI	13584204	A	ubc-14	sense	intron
chrI	13584411	A	ubc-14	sense	intron
chrI	13584420	A	ubc-14	sense	intron
chrI	13584459	A	ubc-14	sense	intron
chrI	13584520	A	ubc-14	sense	intron
chrI	13584533	A	ubc-14	sense	intron
chrI	13584565	A	ubc-14	sense	intron
chrI	1358481	A	Y92H12BL.1	sense	3utr
chrI	1358491	A	Y92H12BL.1	sense	3utr
chrI	1358496	A	Y92H12BL.1	sense	3utr
chrI	1358503	A	Y92H12BL.1	sense	3utr
chrI	1358504	A	Y92H12BL.1	sense	3utr
chrI	1358506	A	Y92H12BL.1	sense	3utr
chrI	1358516	A	Y92H12BL.1	sense	3utr
chrI	1358517	A	Y92H12BL.1	sense	3utr
chrI	1358528	A	Y92H12BL.1	sense	intron
chrI	1358529	A	Y92H12BL.1	sense	intron
chrI	1358550	A	Y92H12BL.1	sense	intron
chrI	1358556	A	Y92H12BL.1	sense	intron
chrI	1358569	A	Y92H12BL.1	sense	intron
chrI	1358580	A	Y92H12BL.1	sense	intron
chrI	1358584	A	Y92H12BL.1	sense	intron
chrI	1358585	A	Y92H12BL.1	sense	intron
chrI	1358586	A	Y92H12BL.1	sense	intron
chrI	1358587	A	Y92H12BL.1	sense	intron
chrI	1358622	A	Y92H12BL.1	sense	intron
chrI	1358699	A	Y92H12BL.1	sense	intron
chrI	1358719	A	Y92H12BL.1	sense	intron
chrI	1358742	A	Y92H12BL.1	sense	intron
chrI	1358743	A	Y92H12BL.1	sense	intron
chrI	1358753	A	Y92H12BL.1	sense	intron
chrI	1358763	A	Y92H12BL.1	sense	intron
chrI	1358764	A	Y92H12BL.1	sense	intron
chrI	1358765	A	Y92H12BL.1	sense	intron
chrI	1358771	A	Y92H12BL.1	sense	intron
chrI	1358772	A	Y92H12BL.1	sense	intron
chrI	1358773	A	Y92H12BL.1	sense	intron
chrI	1358778	A	Y92H12BL.1	sense	intron
chrI	1358789	A	Y92H12BL.1	sense	intron
chrI	1358790	A	Y92H12BL.1	sense	intron
chrI	1358801	A	Y92H12BL.1	sense	intron
chrI	1358812	A	Y92H12BL.1	sense	intron
chrI	1358826	A	Y92H12BL.1	sense	intron
chrI	1358850	A	Y92H12BL.1	sense	intron
chrI	1358855	A	Y92H12BL.1	sense	intron
chrI	1358862	T	Y92H12BL.1	sense	intron
chrI	1358864	A	Y92H12BL.1	sense	intron
chrI	1358891	A	Y92H12BL.1	sense	intron
chrI	1358892	A	Y92H12BL.1	sense	intron
chrI	1358905	A	Y92H12BL.1	sense	intron
chrI	1358917	A	Y92H12BL.1	sense	intron
chrI	1358922	A	Y92H12BL.1	sense	intron
chrI	1358924	A	Y92H12BL.1	sense	intron
chrI	1358930	A	Y92H12BL.1	sense	intron
chrI	1358935	A	Y92H12BL.1	sense	intron
chrI	1358939	A	Y92H12BL.1	sense	intron
chrI	1358940	A	Y92H12BL.1	sense	intron
chrI	1358941	A	Y92H12BL.1	sense	intron
chrI	1358957	A	Y92H12BL.1	sense	intron
chrI	1358959	A	Y92H12BL.1	sense	intron
chrI	1358960	A	Y92H12BL.1	sense	intron
chrI	1358961	A	Y92H12BL.1	sense	intron
chrI	1359040	A	Y92H12BL.1	sense	intron
chrI	1359049	A	Y92H12BL.1	sense	intron
chrI	1359062	A	Y92H12BL.1	sense	intron
chrI	1359065	A	Y92H12BL.1	sense	intron
chrI	1359068	A	Y92H12BL.1	sense	intron
chrI	1359069	A	Y92H12BL.1	sense	intron
chrI	1359097	A	Y92H12BL.1	sense	intron
chrI	1359098	A	Y92H12BL.1	sense	intron
chrI	1359099	A	Y92H12BL.1	sense	intron
chrI	1359104	A	Y92H12BL.1	sense	intron
chrI	1359110	A	Y92H12BL.1	sense	intron
chrI	1359111	A	Y92H12BL.1	sense	intron
chrI	1359113	A	Y92H12BL.1	sense	intron
chrI	1359153	T	Y92H12BL.1	sense	intron
chrI	1359155	A	Y92H12BL.1	sense	intron
chrI	1359162	T	Y92H12BL.1	sense	intron
chrI	1359164	A	Y92H12BL.1	sense	intron
chrI	1359167	T	Y92H12BL.1	sense	intron
chrI	1359168	T	Y92H12BL.1	sense	intron
chrI	1359169	A	Y92H12BL.1	sense	intron
chrI	1359180	A	Y92H12BL.1	sense	intron
chrI	1359190	A	Y92H12BL.1	sense	intron
chrI	1359194	A	Y92H12BL.1	sense	intron
chrI	1359198	A	Y92H12BL.1	sense	intron
chrI	1359204	A	Y92H12BL.1	sense	intron
chrI	1359213	A	Y92H12BL.1	sense	intron
chrI	1359214	A	Y92H12BL.1	sense	intron
chrI	1359218	A	Y92H12BL.1	sense	intron
chrI	1359219	A	Y92H12BL.1	sense	intron
chrI	1359229	A	Y92H12BL.1	sense	intron
chrI	1359236	A	Y92H12BL.1	sense	intron
chrI	1359250	A	Y92H12BL.1	sense	intron
chrI	1359251	A	Y92H12BL.1	sense	intron
chrI	1359258	A	Y92H12BL.1	sense	intron
chrI	1359259	A	Y92H12BL.1	sense	intron
chrI	1359260	A	Y92H12BL.1	sense	intron
chrI	1359261	A	Y92H12BL.1	sense	intron
chrI	1359262	A	Y92H12BL.1	sense	intron
chrI	1359265	A	Y92H12BL.1	sense	intron
chrI	1359267	A	Y92H12BL.1	sense	intron
chrI	1359352	A	Y92H12BL.1	sense	intron
chrI	1359353	A	Y92H12BL.1	sense	intron
chrI	1359362	A	Y92H12BL.1	sense	intron
chrI	1359363	A	Y92H12BL.1	sense	intron
chrI	1359369	A	Y92H12BL.1	sense	intron
chrI	1359373	A	Y92H12BL.1	sense	intron
chrI	1359374	A	Y92H12BL.1	sense	intron
chrI	1359388	A	Y92H12BL.1	sense	intron
chrI	1359397	A	Y92H12BL.1	sense	intron
chrI	1359403	A	Y92H12BL.1	sense	intron
chrI	1359426	A	Y92H12BL.1	sense	3utr
chrI	1359431	A	Y92H12BL.1	sense	3utr
chrI	1359436	A	Y92H12BL.1	sense	3utr
chrI	1359460	A	Y92H12BL.1	sense	3utr
chrI	1359476	A	Y92H12BL.1	sense	3utr
chrI	1359477	A	Y92H12BL.1	sense	3utr
chrI	1359479	A	Y92H12BL.1	sense	3utr
chrI	1359492	A	Y92H12BL.1	sense	3utr
chrI	1359499	A	Y92H12BL.1	sense	3utr
chrI	1359508	A	Y92H12BL.1	sense	3utr
chrI	13639648	T	ND	NA	intergenic
chrI	13650	A	nlp-40	sense	intron
chrI	13658166	A	W09C5.8	antisense	3utr
chrI	13660601	T	W09C5.9	sense	coding
chrI	13661244	A	W09C5.9	sense	intron
chrI	13664317	T	W04A4.5	sense	coding
chrI	13685843	T	W04A4.6	antisense	intron
chrI	13685844	T	W04A4.6	antisense	intron
chrI	13685874	T	W04A4.6	antisense	intron
chrI	13686000	T	W04A4.6	antisense	intron
chrI	13687193	T	W04A4.6	antisense	intron
chrI	1369165	T	Y92H12BL.5	sense	intron
chrI	1369171	T	Y92H12BL.5	sense	intron
chrI	1369174	T	Y92H12BL.5	sense	intron
chrI	1369187	T	Y92H12BL.5	sense	intron
chrI	1369191	T	Y92H12BL.5	sense	intron
chrI	1369197	T	Y92H12BL.5	sense	intron
chrI	1369207	T	Y92H12BL.5	sense	intron
chrI	1369223	T	Y92H12BL.5	sense	intron
chrI	13711061	T	Y6B3B.3	sense	intron
chrI	13711062	T	Y6B3B.3	sense	intron
chrI	13711337	T	Y6B3B.3	sense	intron
chrI	13711346	T	Y6B3B.3	sense	intron
chrI	13711363	T	Y6B3B.3	sense	intron
chrI	13711376	T	Y6B3B.3	sense	intron
chrI	13711385	T	Y6B3B.3	sense	intron
chrI	13711387	T	Y6B3B.3	sense	intron
chrI	13711416	T	Y6B3B.3	sense	intron
chrI	13711584	A	Y6B3B.3	sense	intron
chrI	13711601	A	Y6B3B.3	sense	intron
chrI	13711605	A	Y6B3B.3	sense	intron
chrI	13711606	A	Y6B3B.3	sense	intron
chrI	13730490	A	lagr-1	antisense	intron
chrI	13730676	A	lagr-1	antisense	intron
chrI	13730677	A	lagr-1	antisense	intron
chrI	13730771	T	lagr-1	antisense	intron
chrI	13730782	T	lagr-1	antisense	intron
chrI	13743634	T	Y6B3B.9	antisense	intron
chrI	1375141	A	Y92H12BL.5	sense	intron
chrI	13758111	T	Y6B3B.4	sense	coding
chrI	1375836	A	Y92H12BL.5	sense	intron
chrI	1375851	A	Y92H12BL.5	sense	intron
chrI	1375897	A	ND	NA	intergenic
chrI	1375906	A	ND	NA	intergenic
chrI	1375917	A	ND	NA	intergenic
chrI	1375918	A	ND	NA	intergenic
chrI	1375919	A	ND	NA	intergenic
chrI	1375922	A	ND	NA	intergenic
chrI	1375978	A	ND	NA	intergenic
chrI	1376000	A	ND	NA	intergenic
chrI	1376030	A	ND	NA	intergenic
chrI	1376036	A	ND	NA	intergenic
chrI	1376045	A	ND	NA	intergenic
chrI	1376046	A	ND	NA	intergenic
chrI	1376109	A	ND	NA	intergenic
chrI	1376118	A	ND	NA	intergenic
chrI	1376119	A	ND	NA	intergenic
chrI	1376123	A	ND	NA	intergenic
chrI	1376142	A	ND	NA	intergenic
chrI	1376216	A	ND	NA	intergenic
chrI	1376219	A	ND	NA	intergenic
chrI	1376226	A	ND	NA	intergenic
chrI	1376378	T	ND	NA	intergenic
chrI	1376394	T	ND	NA	intergenic
chrI	1376402	T	ND	NA	intergenic
chrI	1376409	T	ND	NA	intergenic
chrI	1376419	A	ND	NA	intergenic
chrI	1376420	A	ND	NA	intergenic
chrI	1376430	A	ND	NA	intergenic
chrI	1376432	A	ND	NA	intergenic
chrI	1376440	A	ND	NA	intergenic
chrI	1376445	A	ND	NA	intergenic
chrI	1376450	A	ND	NA	intergenic
chrI	1376457	A	ND	NA	intergenic
chrI	1376463	A	ND	NA	intergenic
chrI	1376464	T	ND	NA	intergenic
chrI	1376468	A	ND	NA	intergenic
chrI	1376475	A	ND	NA	intergenic
chrI	1376486	A	ND	NA	intergenic
chrI	1376488	A	ND	NA	intergenic
chrI	1376534	A	ND	NA	intergenic
chrI	1376535	A	ND	NA	intergenic
chrI	1376542	A	ND	NA	intergenic
chrI	1376547	A	ND	NA	intergenic
chrI	1376548	A	ND	NA	intergenic
chrI	1376549	A	ND	NA	intergenic
chrI	1376550	A	ND	NA	intergenic
chrI	1376558	A	ND	NA	intergenic
chrI	1376567	A	ND	NA	intergenic
chrI	1377018	A	Y92H12BL.4	antisense	coding
chrI	13771813	A	ND	NA	intergenic
chrI	13771825	A	ND	NA	intergenic
chrI	13771829	A	ND	NA	intergenic
chrI	13771830	A	ND	NA	intergenic
chrI	13771850	A	ND	NA	intergenic
chrI	13771857	A	ND	NA	intergenic
chrI	13771858	A	ND	NA	intergenic
chrI	13771947	A	ND	NA	intergenic
chrI	13771961	A	ND	NA	intergenic
chrI	13772022	A	ND	NA	intergenic
chrI	13772023	A	ND	NA	intergenic
chrI	13772024	A	ND	NA	intergenic
chrI	13772030	A	ND	NA	intergenic
chrI	13772031	A	ND	NA	intergenic
chrI	13772041	A	ND	NA	intergenic
chrI	13772050	A	ND	NA	intergenic
chrI	13772100	A	ND	NA	intergenic
chrI	13772106	A	ND	NA	intergenic
chrI	13772115	A	ND	NA	intergenic
chrI	13772123	A	ND	NA	intergenic
chrI	13772141	A	ND	NA	intergenic
chrI	13772173	A	ND	NA	intergenic
chrI	13772174	A	ND	NA	intergenic
chrI	13772274	A	ND	NA	intergenic
chrI	13772276	A	ND	NA	intergenic
chrI	13772277	A	ND	NA	intergenic
chrI	13772288	A	ND	NA	intergenic
chrI	13772311	A	ND	NA	intergenic
chrI	13772316	A	ND	NA	intergenic
chrI	13777478	A	Y37H9A.1	sense	intron
chrI	13777798	A	Y37H9A.1	sense	intron
chrI	13778389	T	Y37H9A.1	sense	intron
chrI	13778428	T	Y37H9A.1	sense	intron
chrI	1378200	A	Y92H12BL.4	antisense	intron
chrI	1378211	A	Y92H12BL.4	antisense	intron
chrI	13797914	A	W09G3.7	antisense	intron
chrI	13814747	A	W09G3.6	antisense	3utr
chrI	13826130	A	W09G3.6	antisense	intron
chrI	13826133	A	W09G3.6	antisense	intron
chrI	13826134	A	W09G3.6	antisense	intron
chrI	13826135	A	W09G3.6	antisense	intron
chrI	13838640	A	W04A8.1	antisense	intron
chrI	1386673	T	Y92H12BM.1	antisense	intron
chrI	1386697	T	Y92H12BM.1	antisense	intron
chrI	1386698	T	Y92H12BM.1	antisense	intron
chrI	138676	A	duox-2	sense	coding
chrI	1386786	T	Y92H12BM.1	antisense	intron
chrI	1386811	T	Y92H12BM.1	antisense	intron
chrI	1386830	T	Y92H12BM.1	antisense	intron
chrI	1387456	T	Y92H12BM.1	antisense	intron
chrI	1387671	T	Y92H12BM.1	antisense	intron
chrI	1387734	T	Y92H12BM.1	antisense	intron
chrI	1387744	T	Y92H12BM.1	antisense	intron
chrI	1387745	A	Y92H12BM.1	antisense	intron
chrI	1388885	A	Y92H12BM.1	antisense	intron
chrI	13889764	A	ND	NA	intergenic
chrI	13889770	A	ND	NA	intergenic
chrI	13891519	T	ND	NA	intergenic
chrI	13891818	T	ND	NA	intergenic
chrI	13891839	T	ND	NA	intergenic
chrI	13891916	A	ND	NA	intergenic
chrI	13892651	T	ND	NA	intergenic
chrI	13892728	A	ND	NA	intergenic
chrI	13892749	A	ND	NA	intergenic
chrI	13893048	A	ND	NA	intergenic
chrI	13912240	T	trp-4	sense	coding
chrI	13959	A	nlp-40	sense	intron
chrI	13960	A	nlp-40	sense	intron
chrI	13965755	T	Y71A12B.13	sense	3utr
chrI	13970281	T	Y71A12B.14	sense	3utr
chrI	13970871	T	ND	NA	intergenic
chrI	13988273	A	Y71A12B.17	sense	intron
chrI	13988608	A	Y71A12B.17	sense	intron
chrI	13988613	A	Y71A12B.17	sense	intron
chrI	14000449	T	Y71A12B.18	sense	3utr
chrI	14018936	T	ins-29	sense	coding
chrI	1403213	A	ND	NA	intergenic
chrI	14083542	T	fbxb-93	antisense	intron
chrI	14090466	T	ND	NA	intergenic
chrI	14168749	A	fipr-24	sense	intron
chrI	1417431	A	Y92H12BR.3	sense	intron
chrI	1417448	A	Y92H12BR.3	sense	intron
chrI	1417467	T	Y92H12BR.3	sense	intron
chrI	1417492	A	Y92H12BR.3	sense	intron
chrI	1417536	A	Y92H12BR.3	sense	intron
chrI	1417564	A	Y92H12BR.3	sense	intron
chrI	141759	T	duox-2	sense	coding
chrI	1417785	A	Y92H12BR.3	sense	intron
chrI	1417786	A	Y92H12BR.3	sense	intron
chrI	1417846	A	Y92H12BR.3	sense	intron
chrI	1417847	A	Y92H12BR.3	sense	intron
chrI	1417895	A	Y92H12BR.3	sense	intron
chrI	1417896	A	Y92H12BR.3	sense	intron
chrI	1417902	A	Y92H12BR.3	sense	intron
chrI	1417925	T	Y92H12BR.3	sense	intron
chrI	1417951	T	Y92H12BR.3	sense	intron
chrI	1417974	A	Y92H12BR.3	sense	intron
chrI	1417981	A	Y92H12BR.3	sense	intron
chrI	1417983	A	Y92H12BR.3	sense	intron
chrI	1418024	A	Y92H12BR.3	sense	intron
chrI	1418056	A	Y92H12BR.3	sense	intron
chrI	1418059	A	Y92H12BR.3	sense	intron
chrI	1418090	A	Y92H12BR.3	sense	intron
chrI	1418171	T	Y92H12BR.3	sense	intron
chrI	1418186	A	Y92H12BR.3	sense	intron
chrI	1418196	A	Y92H12BR.3	sense	intron
chrI	1418216	A	Y92H12BR.3	sense	intron
chrI	1418217	A	Y92H12BR.3	sense	intron
chrI	1418228	A	Y92H12BR.3	sense	intron
chrI	1418232	A	Y92H12BR.3	sense	intron
chrI	1418233	A	Y92H12BR.3	sense	intron
chrI	1418343	A	Y92H12BR.3	sense	intron
chrI	1418346	A	Y92H12BR.3	sense	intron
chrI	1418439	A	Y92H12BR.3	sense	intron
chrI	1418449	A	Y92H12BR.3	sense	intron
chrI	1418462	A	Y92H12BR.3	sense	intron
chrI	1418494	A	Y92H12BR.3	sense	intron
chrI	1418709	A	Y92H12BR.3	sense	intron
chrI	1419580	A	Y92H12BR.3	sense	intron
chrI	1422335	A	Y92H12BR.3	sense	intron
chrI	1422344	A	Y92H12BR.3	sense	intron
chrI	1422407	A	Y92H12BR.3	sense	intron
chrI	1422410	A	Y92H12BR.3	sense	intron
chrI	1422451	T	Y92H12BR.3	sense	intron
chrI	1422461	T	Y92H12BR.3	sense	intron
chrI	1422519	T	Y92H12BR.3	sense	intron
chrI	1422531	T	Y92H12BR.3	sense	intron
chrI	1422536	T	Y92H12BR.3	sense	intron
chrI	1422582	A	Y92H12BR.3	sense	intron
chrI	1423391	A	Y92H12BR.3	sense	intron
chrI	1425477	T	ND	NA	intergenic
chrI	1426097	T	ND	NA	intergenic
chrI	1426098	T	ND	NA	intergenic
chrI	1426110	T	ND	NA	intergenic
chrI	1426111	T	ND	NA	intergenic
chrI	1426113	T	ND	NA	intergenic
chrI	1426146	T	ND	NA	intergenic
chrI	1426160	T	ND	NA	intergenic
chrI	1426170	T	ND	NA	intergenic
chrI	1426394	T	ND	NA	intergenic
chrI	14264006	T	pes-7	sense	intron
chrI	14264007	T	pes-7	sense	intron
chrI	14264022	T	pes-7	sense	intron
chrI	14264023	T	pes-7	sense	intron
chrI	1426904	T	ND	NA	intergenic
chrI	14284354	T	fbxb-69	antisense	coding
chrI	14312120	A	F49B2.3	sense	intron
chrI	143187	A	duox-2	sense	coding
chrI	1434335	T	ND	NA	intergenic
chrI	1434357	T	ND	NA	intergenic
chrI	1434368	T	ND	NA	intergenic
chrI	1434371	T	ND	NA	intergenic
chrI	1434407	T	ND	NA	intergenic
chrI	1434480	T	ND	NA	intergenic
chrI	1434513	T	ND	NA	intergenic
chrI	1434514	T	ND	NA	intergenic
chrI	1434559	T	ND	NA	intergenic
chrI	1434693	T	ND	NA	intergenic
chrI	1434697	T	ND	NA	intergenic
chrI	1434861	T	ND	NA	intergenic
chrI	14350091	T	Y105E8A.2	antisense	intron
chrI	14350145	T	Y105E8A.2	antisense	intron
chrI	14350154	T	Y105E8A.2	antisense	intron
chrI	14350201	T	Y105E8A.2	antisense	intron
chrI	14350202	T	Y105E8A.2	antisense	intron
chrI	14350211	T	Y105E8A.2	antisense	intron
chrI	14350239	T	Y105E8A.2	antisense	intron
chrI	14350246	T	Y105E8A.2	antisense	intron
chrI	14350252	T	Y105E8A.2	antisense	intron
chrI	14350279	T	Y105E8A.2	antisense	intron
chrI	14350302	T	Y105E8A.2	antisense	intron
chrI	14350303	T	Y105E8A.2	antisense	intron
chrI	14350314	T	Y105E8A.2	antisense	intron
chrI	14350346	T	Y105E8A.2	antisense	intron
chrI	14350446	T	Y105E8A.2	antisense	intron
chrI	14350447	T	Y105E8A.2	antisense	intron
chrI	14350476	T	Y105E8A.2	antisense	intron
chrI	14350540	T	Y105E8A.2	antisense	intron
chrI	14350583	T	Y105E8A.2	antisense	intron
chrI	14350643	T	Y105E8A.2	antisense	intron
chrI	14350705	T	Y105E8A.2	antisense	intron
chrI	14350706	T	Y105E8A.2	antisense	intron
chrI	14350709	T	Y105E8A.2	antisense	intron
chrI	14350739	T	Y105E8A.2	antisense	intron
chrI	14350768	T	Y105E8A.2	antisense	intron
chrI	14350774	T	Y105E8A.2	antisense	intron
chrI	14351452	A	Y105E8A.2	antisense	coding
chrI	14351801	A	Y105E8A.2	antisense	intron
chrI	14354532	T	Y105E8A.2	antisense	intron
chrI	14354546	T	Y105E8A.2	antisense	intron
chrI	14365526	A	Y105E8A.3	sense	intron
chrI	14365546	A	Y105E8A.3	sense	intron
chrI	14365577	A	Y105E8A.3	sense	intron
chrI	14365867	A	Y105E8A.3	sense	intron
chrI	14365883	A	Y105E8A.3	sense	intron
chrI	14365884	A	Y105E8A.3	sense	intron
chrI	14365913	A	Y105E8A.3	sense	intron
chrI	14365980	A	Y105E8A.3	sense	intron
chrI	14365996	A	Y105E8A.3	sense	intron
chrI	14369032	A	ech-7	antisense	intron
chrI	14375818	A	bbs-1	antisense	coding
chrI	1437841	A	Y92H12BR.8	sense	intron
chrI	1437861	T	Y92H12BR.8	sense	intron
chrI	1437868	T	Y92H12BR.8	sense	intron
chrI	1437969	T	Y92H12BR.8	sense	intron
chrI	1438122	A	Y92H12BR.8	sense	intron
chrI	1438925	T	Y92H12BR.8	sense	intron
chrI	1438968	T	Y92H12BR.8	sense	intron
chrI	1438977	A	Y92H12BR.8	sense	intron
chrI	1438985	T	Y92H12BR.8	sense	intron
chrI	1439188	A	Y92H12BR.8	sense	intron
chrI	1439231	A	Y92H12BR.8	sense	intron
chrI	1439617	A	Y92H12BR.8	sense	intron
chrI	14400324	T	ND	NA	intergenic
chrI	14400336	T	ND	NA	intergenic
chrI	14400337	T	ND	NA	intergenic
chrI	14400358	T	ND	NA	intergenic
chrI	14400359	T	ND	NA	intergenic
chrI	14400364	T	ND	NA	intergenic
chrI	14400387	T	ND	NA	intergenic
chrI	14400403	T	ND	NA	intergenic
chrI	14400408	T	ND	NA	intergenic
chrI	14400551	T	ND	NA	intergenic
chrI	14400592	T	ND	NA	intergenic
chrI	14400599	T	ND	NA	intergenic
chrI	14400600	T	ND	NA	intergenic
chrI	14400601	T	ND	NA	intergenic
chrI	14400607	T	ND	NA	intergenic
chrI	14400619	T	ND	NA	intergenic
chrI	1440063	A	Y92H12BR.8	sense	intron
chrI	1440376	A	Y92H12BR.8	sense	intron
chrI	1440383	A	Y92H12BR.8	sense	intron
chrI	14429118	T	Y105E8A.10	sense	intron
chrI	14448181	A	catp-1	antisense	intron
chrI	14448182	A	catp-1	antisense	intron
chrI	14448187	A	catp-1	antisense	intron
chrI	14448188	A	catp-1	antisense	intron
chrI	14448193	A	catp-1	antisense	intron
chrI	14461715	A	Y105E8A.13	antisense	intron
chrI	14463673	A	Y105E8A.13	antisense	intron
chrI	14472203	A	ekl-4	sense	intron
chrI	14497855	A	Y105E8A.28	antisense	coding
chrI	14505135	A	Y105E8A.21	antisense	intron
chrI	14505144	A	Y105E8A.21	antisense	intron
chrI	14505150	A	Y105E8A.21	antisense	intron
chrI	14505158	A	Y105E8A.21	antisense	intron
chrI	14505166	A	Y105E8A.21	antisense	intron
chrI	14505640	T	Y105E8A.21	antisense	intron
chrI	14513048	T	exc-4	antisense	intron
chrI	14513067	T	exc-4	antisense	intron
chrI	14513080	T	exc-4	antisense	intron
chrI	14513090	T	exc-4	antisense	intron
chrI	14513099	T	exc-4	antisense	intron
chrI	14513108	T	exc-4	antisense	intron
chrI	14513118	T	exc-4	antisense	intron
chrI	14513119	T	exc-4	antisense	intron
chrI	14513287	T	exc-4	antisense	intron
chrI	14513337	T	exc-4	antisense	intron
chrI	14513380	T	exc-4	antisense	intron
chrI	14513381	T	exc-4	antisense	intron
chrI	14513428	T	exc-4	antisense	intron
chrI	14513529	T	exc-4	antisense	intron
chrI	14513536	T	exc-4	antisense	intron
chrI	14513537	T	exc-4	antisense	intron
chrI	14513581	T	exc-4	antisense	intron
chrI	14513582	T	exc-4	antisense	intron
chrI	14513592	T	exc-4	antisense	intron
chrI	14513596	T	exc-4	antisense	intron
chrI	14513608	T	exc-4	antisense	intron
chrI	14513611	T	exc-4	antisense	intron
chrI	14513648	T	exc-4	antisense	intron
chrI	14513651	T	exc-4	antisense	intron
chrI	14513652	T	exc-4	antisense	intron
chrI	14513659	T	exc-4	antisense	intron
chrI	14513722	T	exc-4	antisense	intron
chrI	14513791	T	exc-4	antisense	intron
chrI	14513810	T	exc-4	antisense	intron
chrI	14513811	T	exc-4	antisense	intron
chrI	14513823	T	exc-4	antisense	intron
chrI	14513853	T	exc-4	antisense	intron
chrI	14513892	T	exc-4	antisense	intron
chrI	14521687	T	ND	NA	intergenic
chrI	14538666	A	zoo-1	sense	intron
chrI	14567579	T	Y105E8A.24	antisense	intron
chrI	14567584	T	Y105E8A.24	antisense	intron
chrI	14567589	T	Y105E8A.24	antisense	intron
chrI	14567590	T	Y105E8A.24	antisense	intron
chrI	14567869	T	Y105E8A.24	antisense	intron
chrI	14567870	T	Y105E8A.24	antisense	intron
chrI	14568022	T	Y105E8A.24	antisense	intron
chrI	14568040	T	Y105E8A.24	antisense	intron
chrI	14568042	T	Y105E8A.24	antisense	intron
chrI	14568047	T	Y105E8A.24	antisense	intron
chrI	14568055	T	Y105E8A.24	antisense	intron
chrI	14568057	T	Y105E8A.24	antisense	intron
chrI	14568064	T	Y105E8A.24	antisense	intron
chrI	14568090	T	Y105E8A.24	antisense	intron
chrI	14568111	T	Y105E8A.24	antisense	intron
chrI	14568112	T	Y105E8A.24	antisense	intron
chrI	14568113	T	Y105E8A.24	antisense	intron
chrI	14568136	T	Y105E8A.24	antisense	intron
chrI	14568137	T	Y105E8A.24	antisense	intron
chrI	14568146	T	Y105E8A.24	antisense	intron
chrI	14568149	T	Y105E8A.24	antisense	intron
chrI	14568210	T	Y105E8A.24	antisense	intron
chrI	14604708	T	ND	NA	intergenic
chrI	14604747	T	ND	NA	intergenic
chrI	14604750	T	ND	NA	intergenic
chrI	14604752	T	ND	NA	intergenic
chrI	14604753	T	ND	NA	intergenic
chrI	14644863	A	Y105E8B.7	sense	intron
chrI	14644878	A	Y105E8B.7	sense	intron
chrI	14649125	A	bath-40	sense	intron
chrI	14649148	A	bath-40	sense	intron
chrI	14649565	A	bath-40	sense	intron
chrI	14649663	A	bath-40	sense	intron
chrI	14649672	A	bath-40	sense	intron
chrI	14649685	A	bath-40	sense	intron
chrI	14649824	A	bath-40	sense	intron
chrI	14649861	A	bath-40	sense	intron
chrI	14654703	A	riok-2	sense	intron
chrI	14654716	A	riok-2	sense	intron
chrI	14654719	A	riok-2	sense	intron
chrI	14660277	A	Y105E8B.5	sense	intron
chrI	14660278	A	Y105E8B.5	sense	intron
chrI	14660361	A	Y105E8B.5	sense	intron
chrI	14660364	A	Y105E8B.5	sense	intron
chrI	14660373	A	Y105E8B.5	sense	intron
chrI	14664062	A	ND	NA	intergenic
chrI	1466653	A	F47G6.3	sense	coding
chrI	14702247	T	npp-4	antisense	intron
chrI	14702248	T	npp-4	antisense	intron
chrI	14702403	T	npp-4	antisense	intron
chrI	14702670	A	npp-4	antisense	intron
chrI	14702671	A	npp-4	antisense	intron
chrI	14702689	T	npp-4	antisense	intron
chrI	14702709	T	npp-4	antisense	intron
chrI	14703943	T	npp-4	antisense	intron
chrI	14703944	T	npp-4	antisense	intron
chrI	14704355	T	npp-4	antisense	intron
chrI	14715016	T	Y54E5A.7	sense	3utr
chrI	14736738	T	K05C4.4	sense	coding
chrI	14754454	T	ND	NA	intergenic
chrI	14754459	T	ND	NA	intergenic
chrI	14754466	T	ND	NA	intergenic
chrI	14754490	T	ND	NA	intergenic
chrI	14760323	T	rps-26	sense	intron
chrI	14772460	A	F39B2.7	antisense	intron
chrI	14852159	T	aex-5	antisense	intron
chrI	14870538	A	F11C3.1	sense	intron
chrI	1490387	T	dyb-1	sense	3utr
chrI	14913863	T	F21F12.1	sense	coding
chrI	1491586	T	Y92H12A.5	antisense	intron
chrI	1491591	T	Y92H12A.5	antisense	intron
chrI	1491683	T	Y92H12A.5	antisense	intron
chrI	1491705	T	Y92H12A.5	antisense	intron
chrI	1491845	T	Y92H12A.5	antisense	intron
chrI	1491894	T	Y92H12A.5	antisense	intron
chrI	1491925	A	Y92H12A.5	antisense	intron
chrI	1491947	A	Y92H12A.5	antisense	intron
chrI	14934926	T	kin-1	sense	intron
chrI	1493765	A	Y92H12A.5	antisense	intron
chrI	1493801	A	Y92H12A.5	antisense	intron
chrI	1493828	A	Y92H12A.5	antisense	intron
chrI	1493829	A	Y92H12A.5	antisense	intron
chrI	1493905	A	Y92H12A.5	antisense	intron
chrI	1494216	A	Y92H12A.5	antisense	intron
chrI	1494217	A	Y92H12A.5	antisense	intron
chrI	14944979	A	kin-1	sense	intron
chrI	14963406	A	ces-2	sense	intron
chrI	14963461	A	ces-2	sense	intron
chrI	15005601	A	F33H2.5	antisense	3utr
chrI	15033913	T	ND	NA	intergenic
chrI	1505628	A	Y92H12A.5	antisense	intron
chrI	1508145	A	Y92H12A.5	antisense	intron
chrI	1516405	A	Y92H12A.4	sense	intron
chrI	1517311	T	Y92H12A.4	sense	intron
chrI	1517312	T	Y92H12A.4	sense	intron
chrI	1517330	T	Y92H12A.4	sense	intron
chrI	1517333	T	Y92H12A.4	sense	intron
chrI	1521733	A	Y92H12A.4	sense	intron
chrI	1521736	T	Y92H12A.4	sense	intron
chrI	1521746	T	Y92H12A.4	sense	intron
chrI	1545885	T	Y92H12A.2	sense	intron
chrI	1546290	T	Y92H12A.2	sense	intron
chrI	1546292	T	Y92H12A.2	sense	intron
chrI	1554045	A	Y92H12A.2	sense	intron
chrI	1554046	A	Y92H12A.2	sense	intron
chrI	1554057	A	Y92H12A.2	sense	intron
chrI	15540	A	nlp-40	sense	intron
chrI	1554190	A	Y92H12A.2	sense	intron
chrI	15541	A	nlp-40	sense	intron
chrI	1564366	T	ND	NA	intergenic
chrI	1564367	T	ND	NA	intergenic
chrI	1564385	T	ND	NA	intergenic
chrI	1565669	A	ND	NA	intergenic
chrI	1566588	A	ND	NA	intergenic
chrI	1566649	A	ND	NA	intergenic
chrI	1566650	A	ND	NA	intergenic
chrI	1567129	A	src-1	sense	intron
chrI	1567140	A	src-1	sense	intron
chrI	1567189	A	src-1	sense	intron
chrI	1567207	A	src-1	sense	intron
chrI	1567208	A	src-1	sense	intron
chrI	1569040	A	src-1	sense	intron
chrI	1569211	A	src-1	sense	intron
chrI	1569792	A	src-1	sense	intron
chrI	1570032	T	src-1	sense	intron
chrI	1576084	A	src-1	sense	intron
chrI	1576483	A	src-1	sense	intron
chrI	1576506	A	src-1	sense	intron
chrI	1576789	A	src-1	sense	intron
chrI	1576823	A	src-1	sense	intron
chrI	1576867	A	src-1	sense	intron
chrI	1576882	A	src-1	sense	intron
chrI	1576883	A	src-1	sense	intron
chrI	1576950	A	src-1	sense	intron
chrI	1577114	A	src-1	sense	intron
chrI	1577135	A	src-1	sense	intron
chrI	1577183	A	src-1	sense	intron
chrI	1577225	A	src-1	sense	intron
chrI	1577226	A	src-1	sense	intron
chrI	1578050	A	src-1	sense	intron
chrI	1578073	A	src-1	sense	intron
chrI	1578087	A	src-1	sense	intron
chrI	1578088	A	src-1	sense	intron
chrI	1614154	A	adpr-1	sense	intron
chrI	1614159	A	adpr-1	sense	intron
chrI	1614217	A	adpr-1	sense	intron
chrI	1614316	A	adpr-1	sense	intron
chrI	1614326	A	adpr-1	sense	intron
chrI	1614329	T	adpr-1	sense	intron
chrI	1615424	A	adpr-1	sense	intron
chrI	1620774	A	ND	NA	intergenic
chrI	1620845	A	ND	NA	intergenic
chrI	1620850	A	ND	NA	intergenic
chrI	1631218	A	Y73E7A.1	sense	intron
chrI	1631246	A	Y73E7A.1	sense	intron
chrI	1631297	A	Y73E7A.1	sense	intron
chrI	1631301	A	Y73E7A.1	sense	intron
chrI	1631327	A	Y73E7A.1	sense	intron
chrI	1631489	A	Y73E7A.1	sense	intron
chrI	1631512	A	Y73E7A.1	sense	intron
chrI	1631513	A	Y73E7A.1	sense	intron
chrI	1647350	T	mab-20	antisense	intron
chrI	1647386	T	mab-20	antisense	intron
chrI	1647398	T	mab-20	antisense	intron
chrI	1647430	T	mab-20	antisense	intron
chrI	1666693	A	Y71G12B.22	antisense	coding
chrI	1674400	T	Y71G12B.35	antisense	intron
chrI	1674451	T	Y71G12B.35	antisense	intron
chrI	1674452	T	Y71G12B.35	antisense	intron
chrI	1674486	T	Y71G12B.35	antisense	intron
chrI	1674638	T	Y71G12B.35	antisense	intron
chrI	1674678	T	Y71G12B.35	antisense	intron
chrI	1674679	T	Y71G12B.35	antisense	intron
chrI	1674691	T	Y71G12B.35	antisense	intron
chrI	1696254	A	ND	NA	intergenic
chrI	1696396	A	ND	NA	intergenic
chrI	1696406	A	ND	NA	intergenic
chrI	1696420	A	ND	NA	intergenic
chrI	1696463	A	ND	NA	intergenic
chrI	1696537	A	ND	NA	intergenic
chrI	1696580	A	ND	NA	intergenic
chrI	1696604	A	ND	NA	intergenic
chrI	1696605	A	ND	NA	intergenic
chrI	1696764	A	ND	NA	intergenic
chrI	1697202	T	ND	NA	intergenic
chrI	1697233	A	ND	NA	intergenic
chrI	1697727	A	ND	NA	intergenic
chrI	1697770	T	ND	NA	intergenic
chrI	1701788	T	lsm-6	sense	3utr
chrI	1703670	A	Y71G12B.13	sense	intron
chrI	1703672	A	Y71G12B.13	sense	intron
chrI	1703684	A	Y71G12B.13	sense	intron
chrI	1703685	A	Y71G12B.13	sense	intron
chrI	1703687	A	Y71G12B.13	sense	intron
chrI	1703688	A	Y71G12B.13	sense	intron
chrI	1703689	A	Y71G12B.13	sense	intron
chrI	1703694	A	Y71G12B.13	sense	intron
chrI	1703699	A	Y71G12B.13	sense	intron
chrI	1703707	T	Y71G12B.13	sense	intron
chrI	1703708	A	Y71G12B.13	sense	intron
chrI	1703864	T	Y71G12B.13	sense	intron
chrI	1706381	A	Y71G12B.13	sense	intron
chrI	1706402	A	Y71G12B.13	sense	intron
chrI	1706450	A	Y71G12B.13	sense	intron
chrI	1706519	A	Y71G12B.13	sense	intron
chrI	1718670	A	ND	NA	intergenic
chrI	1718671	A	ND	NA	intergenic
chrI	1741800	T	mppa-1	antisense	intron
chrI	1741903	A	mppa-1	antisense	intron
chrI	1745257	T	mppa-1	antisense	intron
chrI	1748849	A	mppa-1	antisense	intron
chrI	1751939	A	Y71G12B.10	sense	intron
chrI	1751954	A	Y71G12B.10	sense	intron
chrI	1751959	A	Y71G12B.10	sense	intron
chrI	1751961	A	Y71G12B.10	sense	intron
chrI	1752061	A	Y71G12B.10	sense	intron
chrI	1752089	A	Y71G12B.10	sense	intron
chrI	1752096	A	Y71G12B.10	sense	intron
chrI	1752110	A	Y71G12B.10	sense	intron
chrI	1752266	A	Y71G12B.10	sense	intron
chrI	1752267	A	Y71G12B.10	sense	intron
chrI	1752272	A	Y71G12B.10	sense	intron
chrI	1752273	A	Y71G12B.10	sense	intron
chrI	1752280	A	Y71G12B.10	sense	intron
chrI	1752284	A	Y71G12B.10	sense	intron
chrI	1752301	A	Y71G12B.10	sense	intron
chrI	1752302	A	Y71G12B.10	sense	intron
chrI	1752303	A	Y71G12B.10	sense	intron
chrI	1752304	A	Y71G12B.10	sense	intron
chrI	1752309	A	Y71G12B.10	sense	intron
chrI	1752316	A	Y71G12B.10	sense	intron
chrI	1752457	A	Y71G12B.10	sense	intron
chrI	1752464	A	Y71G12B.10	sense	intron
chrI	1752465	A	Y71G12B.10	sense	intron
chrI	1752466	A	Y71G12B.10	sense	intron
chrI	1752468	A	Y71G12B.10	sense	intron
chrI	1752471	A	Y71G12B.10	sense	intron
chrI	1752473	A	Y71G12B.10	sense	intron
chrI	1752475	A	Y71G12B.10	sense	intron
chrI	1752476	A	Y71G12B.10	sense	intron
chrI	1752504	A	Y71G12B.10	sense	intron
chrI	1753066	A	Y71G12B.10	sense	intron
chrI	1753067	A	Y71G12B.10	sense	intron
chrI	1753112	A	Y71G12B.10	sense	intron
chrI	1753123	A	Y71G12B.10	sense	intron
chrI	1753287	A	Y71G12B.10	sense	intron
chrI	1753692	A	Y71G12B.10	sense	intron
chrI	1753865	A	Y71G12B.10	sense	intron
chrI	1753878	A	Y71G12B.10	sense	intron
chrI	1790339	A	ND	NA	intergenic
chrI	1818631	A	Y71G12B.30	antisense	coding
chrI	1824831	A	Y71G12B.1	sense	intron
chrI	1824844	A	Y71G12B.1	sense	intron
chrI	1824855	A	Y71G12B.1	sense	intron
chrI	1824856	A	Y71G12B.1	sense	intron
chrI	1824866	A	Y71G12B.1	sense	intron
chrI	1824957	A	Y71G12B.1	sense	intron
chrI	1824971	A	Y71G12B.1	sense	intron
chrI	1825005	A	Y71G12B.1	sense	intron
chrI	1825089	A	Y71G12B.1	sense	intron
chrI	1825103	A	Y71G12B.1	sense	intron
chrI	1825113	A	Y71G12B.1	sense	intron
chrI	1825122	A	Y71G12B.1	sense	intron
chrI	1825127	A	Y71G12B.1	sense	intron
chrI	1825131	A	Y71G12B.1	sense	intron
chrI	1825138	A	Y71G12B.1	sense	intron
chrI	1825150	A	Y71G12B.1	sense	intron
chrI	1825179	A	Y71G12B.1	sense	intron
chrI	1825186	A	Y71G12B.1	sense	intron
chrI	1825248	A	Y71G12B.1	sense	intron
chrI	1825249	A	Y71G12B.1	sense	intron
chrI	184321	A	ND	NA	intergenic
chrI	1843225	T	emr-1	sense	3utr
chrI	184344	A	ND	NA	intergenic
chrI	184403	A	ND	NA	intergenic
chrI	184433	A	ND	NA	intergenic
chrI	184434	A	ND	NA	intergenic
chrI	184957	A	ND	NA	intergenic
chrI	184979	A	ND	NA	intergenic
chrI	185036	A	ND	NA	intergenic
chrI	185045	A	ND	NA	intergenic
chrI	185056	A	ND	NA	intergenic
chrI	1854159	T	M01D7.9	antisense	intron
chrI	1854170	T	M01D7.9	antisense	intron
chrI	1854539	T	M01D7.9	antisense	intron
chrI	1854645	T	M01D7.9	antisense	intron
chrI	185975	T	ND	NA	intergenic
chrI	185984	T	ND	NA	intergenic
chrI	1864216	T	scm-1	antisense	intron
chrI	1864226	T	scm-1	antisense	intron
chrI	1864366	T	scm-1	antisense	intron
chrI	1864367	T	scm-1	antisense	intron
chrI	1864376	T	scm-1	antisense	intron
chrI	1864396	T	scm-1	antisense	intron
chrI	1864449	T	scm-1	antisense	intron
chrI	1864459	T	scm-1	antisense	intron
chrI	1864475	T	scm-1	antisense	intron
chrI	1864490	T	scm-1	antisense	intron
chrI	1867785	A	scm-1	antisense	intron
chrI	1867805	T	scm-1	antisense	intron
chrI	1868660	A	scm-1	antisense	intron
chrI	1868688	A	scm-1	antisense	intron
chrI	1868693	A	scm-1	antisense	intron
chrI	1868719	A	scm-1	antisense	intron
chrI	1868746	A	scm-1	antisense	intron
chrI	1868755	T	scm-1	antisense	intron
chrI	1868765	A	scm-1	antisense	intron
chrI	1868774	A	scm-1	antisense	intron
chrI	1868777	A	scm-1	antisense	intron
chrI	1871553	T	scm-1	antisense	intron
chrI	1878323	A	tub-2	sense	intron
chrI	1878328	A	tub-2	sense	intron
chrI	1882368	A	tub-2	sense	intron
chrI	1882386	A	tub-2	sense	intron
chrI	1882395	A	tub-2	sense	intron
chrI	1882592	A	tub-2	sense	intron
chrI	1895667	T	Y71G12A.2	sense	coding
chrI	1896024	T	Y71G12A.2	sense	intron
chrI	1898775	A	Y71G12A.2	sense	intron
chrI	1898809	A	Y71G12A.2	sense	intron
chrI	1908013	T	Y71G12A.2	sense	intron
chrI	1908014	T	Y71G12A.2	sense	intron
chrI	1908015	T	Y71G12A.2	sense	intron
chrI	1908020	T	Y71G12A.2	sense	intron
chrI	1908027	T	Y71G12A.2	sense	intron
chrI	1912336	T	Y51F10.7	antisense	intron
chrI	1912593	T	Y51F10.7	antisense	intron
chrI	1912607	T	Y51F10.7	antisense	intron
chrI	1912610	T	Y51F10.7	antisense	intron
chrI	1912612	T	Y51F10.7	antisense	intron
chrI	1912631	T	Y51F10.7	antisense	intron
chrI	1912632	T	Y51F10.7	antisense	intron
chrI	1912862	T	Y51F10.7	antisense	intron
chrI	1912867	T	Y51F10.7	antisense	intron
chrI	1912895	T	Y51F10.7	antisense	intron
chrI	1912993	T	Y51F10.7	antisense	intron
chrI	1913023	T	Y51F10.7	antisense	intron
chrI	1913024	T	Y51F10.7	antisense	intron
chrI	1913050	T	Y51F10.7	antisense	intron
chrI	1913077	T	Y51F10.7	antisense	intron
chrI	1913110	T	Y51F10.7	antisense	intron
chrI	1913115	T	Y51F10.7	antisense	intron
chrI	1913116	T	Y51F10.7	antisense	intron
chrI	1913136	T	Y51F10.7	antisense	intron
chrI	1913148	T	Y51F10.7	antisense	intron
chrI	1913178	T	Y51F10.7	antisense	intron
chrI	1913220	T	Y51F10.7	antisense	intron
chrI	1913221	T	Y51F10.7	antisense	intron
chrI	1913222	T	Y51F10.7	antisense	intron
chrI	1913244	T	Y51F10.7	antisense	intron
chrI	1913256	T	Y51F10.7	antisense	intron
chrI	1913257	T	Y51F10.7	antisense	intron
chrI	1915458	T	ND	NA	intergenic
chrI	1915480	T	ND	NA	intergenic
chrI	1915484	T	ND	NA	intergenic
chrI	1915505	T	ND	NA	intergenic
chrI	1915510	T	ND	NA	intergenic
chrI	1915670	A	ND	NA	intergenic
chrI	1915736	T	ND	NA	intergenic
chrI	1915738	T	ND	NA	intergenic
chrI	1915740	T	ND	NA	intergenic
chrI	1916398	T	ND	NA	intergenic
chrI	1916407	T	ND	NA	intergenic
chrI	1916637	T	ND	NA	intergenic
chrI	1916639	T	ND	NA	intergenic
chrI	1917188	T	Y51F10.6	sense	intron
chrI	1917200	T	Y51F10.6	sense	intron
chrI	1917213	T	Y51F10.6	sense	intron
chrI	1917222	T	Y51F10.6	sense	intron
chrI	1917223	T	Y51F10.6	sense	intron
chrI	1917271	T	Y51F10.6	sense	intron
chrI	1917272	T	Y51F10.6	sense	intron
chrI	1917276	T	Y51F10.6	sense	intron
chrI	1917391	T	Y51F10.6	sense	intron
chrI	1917437	T	Y51F10.6	sense	intron
chrI	1917475	T	Y51F10.6	sense	intron
chrI	1917476	T	Y51F10.6	sense	intron
chrI	1917477	T	Y51F10.6	sense	intron
chrI	1917524	T	Y51F10.6	sense	intron
chrI	1917591	T	Y51F10.6	sense	intron
chrI	1917614	T	Y51F10.6	sense	intron
chrI	1917629	T	Y51F10.6	sense	intron
chrI	1917630	T	Y51F10.6	sense	intron
chrI	1917646	T	Y51F10.6	sense	intron
chrI	1917656	T	Y51F10.6	sense	intron
chrI	1917657	T	Y51F10.6	sense	intron
chrI	1917699	A	Y51F10.6	sense	intron
chrI	1917700	A	Y51F10.6	sense	intron
chrI	1918426	A	Y51F10.6	sense	intron
chrI	1918479	A	Y51F10.6	sense	intron
chrI	1918485	A	Y51F10.6	sense	intron
chrI	1918508	A	Y51F10.6	sense	intron
chrI	1918656	A	Y51F10.6	sense	intron
chrI	1918667	T	Y51F10.6	sense	intron
chrI	1918687	T	Y51F10.6	sense	intron
chrI	1918712	T	Y51F10.6	sense	intron
chrI	1918755	T	Y51F10.6	sense	intron
chrI	1918762	A	Y51F10.6	sense	intron
chrI	1918828	T	Y51F10.6	sense	intron
chrI	1939783	A	Y51F10.4	sense	intron
chrI	1940642	A	Y51F10.4	sense	intron
chrI	1940770	A	Y51F10.4	sense	intron
chrI	1951518	T	Y51F10.10	antisense	intron
chrI	1951545	T	Y51F10.10	antisense	intron
chrI	1951603	T	Y51F10.10	antisense	intron
chrI	1951640	T	Y51F10.10	antisense	intron
chrI	1951641	T	Y51F10.10	antisense	intron
chrI	1951666	T	Y51F10.10	antisense	intron
chrI	1951688	T	Y51F10.10	antisense	intron
chrI	1951701	T	Y51F10.10	antisense	intron
chrI	1951742	T	Y51F10.10	antisense	intron
chrI	1951851	T	Y51F10.10	antisense	intron
chrI	1951866	T	Y51F10.10	antisense	intron
chrI	1951920	T	Y51F10.10	antisense	intron
chrI	1951945	T	Y51F10.10	antisense	intron
chrI	1951966	T	Y51F10.10	antisense	intron
chrI	1951975	A	Y51F10.10	antisense	intron
chrI	1951993	T	Y51F10.10	antisense	intron
chrI	1952119	T	Y51F10.10	antisense	intron
chrI	1964747	T	Y51F10.11	sense	intron
chrI	1975327	A	ND	NA	intergenic
chrI	1975328	A	ND	NA	intergenic
chrI	1976121	A	ND	NA	intergenic
chrI	1987120	T	ND	NA	intergenic
chrI	1987148	T	ND	NA	intergenic
chrI	1987164	T	ND	NA	intergenic
chrI	1987165	T	ND	NA	intergenic
chrI	1987355	T	ND	NA	intergenic
chrI	1987365	T	ND	NA	intergenic
chrI	1987368	T	ND	NA	intergenic
chrI	1987372	T	ND	NA	intergenic
chrI	1987400	T	ND	NA	intergenic
chrI	1987407	T	ND	NA	intergenic
chrI	1987408	T	ND	NA	intergenic
chrI	1987462	T	ND	NA	intergenic
chrI	1993786	T	gap-3	antisense	intron
chrI	1993808	T	gap-3	antisense	intron
chrI	2003202	A	gap-3	antisense	intron
chrI	2003205	A	gap-3	antisense	intron
chrI	2003207	A	gap-3	antisense	intron
chrI	2010165	A	gap-3	antisense	intron
chrI	2033869	A	Y20F4.2	sense	3utr
chrI	2033881	A	Y20F4.2	sense	3utr
chrI	2033884	A	Y20F4.2	sense	3utr
chrI	2033891	A	Y20F4.2	sense	3utr
chrI	2033896	A	Y20F4.2	sense	3utr
chrI	2033914	A	Y20F4.2	sense	3utr
chrI	2034040	A	ND	NA	intergenic
chrI	2034075	A	ND	NA	intergenic
chrI	2034078	A	ND	NA	intergenic
chrI	2034087	A	ND	NA	intergenic
chrI	2034088	A	ND	NA	intergenic
chrI	2034871	T	Y20F4.4	antisense	intron
chrI	2036267	A	Y20F4.4	antisense	intron
chrI	2036300	T	Y20F4.4	antisense	intron
chrI	2036490	T	Y20F4.4	antisense	intron
chrI	2036496	T	Y20F4.4	antisense	intron
chrI	2040002	A	Y20F4.4	antisense	intron
chrI	2040008	A	Y20F4.4	antisense	intron
chrI	2040198	A	Y20F4.4	antisense	intron
chrI	2040231	T	Y20F4.4	antisense	intron
chrI	2056370	T	ND	NA	intergenic
chrI	2056378	T	ND	NA	intergenic
chrI	2056379	T	ND	NA	intergenic
chrI	2056380	T	ND	NA	intergenic
chrI	2056381	T	ND	NA	intergenic
chrI	2056401	T	ND	NA	intergenic
chrI	2056408	T	ND	NA	intergenic
chrI	2056456	T	ND	NA	intergenic
chrI	2056491	A	ND	NA	intergenic
chrI	2056499	A	ND	NA	intergenic
chrI	2056502	A	ND	NA	intergenic
chrI	2056514	A	ND	NA	intergenic
chrI	2056572	T	ND	NA	intergenic
chrI	2056573	T	ND	NA	intergenic
chrI	2056578	T	ND	NA	intergenic
chrI	2056620	T	ND	NA	intergenic
chrI	2056621	A	ND	NA	intergenic
chrI	2056654	T	ND	NA	intergenic
chrI	2056655	T	ND	NA	intergenic
chrI	2056673	T	ND	NA	intergenic
chrI	2056674	T	ND	NA	intergenic
chrI	2056721	T	ND	NA	intergenic
chrI	2056722	T	ND	NA	intergenic
chrI	2056789	A	ND	NA	intergenic
chrI	2056790	A	ND	NA	intergenic
chrI	2056805	A	ND	NA	intergenic
chrI	2056819	A	ND	NA	intergenic
chrI	2056850	A	ND	NA	intergenic
chrI	2060131	T	ND	NA	intergenic
chrI	2060132	T	ND	NA	intergenic
chrI	2060162	T	ND	NA	intergenic
chrI	2060176	T	ND	NA	intergenic
chrI	2060191	T	ND	NA	intergenic
chrI	2060192	T	ND	NA	intergenic
chrI	2060259	A	ND	NA	intergenic
chrI	2060260	A	ND	NA	intergenic
chrI	2060307	A	ND	NA	intergenic
chrI	2060308	A	ND	NA	intergenic
chrI	2060326	A	ND	NA	intergenic
chrI	2060327	A	ND	NA	intergenic
chrI	2060360	T	ND	NA	intergenic
chrI	2060361	A	ND	NA	intergenic
chrI	2060403	A	ND	NA	intergenic
chrI	2060408	A	ND	NA	intergenic
chrI	2060409	A	ND	NA	intergenic
chrI	2060467	T	ND	NA	intergenic
chrI	2060479	T	ND	NA	intergenic
chrI	2060482	T	ND	NA	intergenic
chrI	2060490	T	ND	NA	intergenic
chrI	2060512	T	ND	NA	intergenic
chrI	2060525	A	ND	NA	intergenic
chrI	2060580	A	ND	NA	intergenic
chrI	206059	A	atm-1	sense	intron
chrI	2060600	A	ND	NA	intergenic
chrI	2060601	A	ND	NA	intergenic
chrI	2060602	A	ND	NA	intergenic
chrI	2060603	A	ND	NA	intergenic
chrI	2060611	A	ND	NA	intergenic
chrI	2060626	A	ND	NA	intergenic
chrI	2061927	A	Y37E3.1	antisense	intron
chrI	2062153	T	Y37E3.1	antisense	intron
chrI	2062156	T	Y37E3.1	antisense	intron
chrI	2062185	T	Y37E3.1	antisense	intron
chrI	2062195	T	Y37E3.1	antisense	intron
chrI	2062205	T	Y37E3.1	antisense	intron
chrI	2062263	T	Y37E3.1	antisense	intron
chrI	2062276	T	Y37E3.1	antisense	intron
chrI	2062305	T	Y37E3.1	antisense	intron
chrI	2062306	T	Y37E3.1	antisense	intron
chrI	2062314	T	Y37E3.1	antisense	intron
chrI	2062361	T	Y37E3.1	antisense	intron
chrI	2062383	T	Y37E3.1	antisense	intron
chrI	2062395	T	Y37E3.1	antisense	intron
chrI	2062409	T	Y37E3.1	antisense	intron
chrI	2062422	T	Y37E3.1	antisense	intron
chrI	2062649	T	Y37E3.1	antisense	intron
chrI	2062654	T	Y37E3.1	antisense	intron
chrI	2062666	T	Y37E3.1	antisense	intron
chrI	2062677	T	Y37E3.1	antisense	intron
chrI	2062689	T	Y37E3.1	antisense	intron
chrI	2066223	T	arl-13	sense	intron
chrI	2073153	A	Y37E3.10	sense	intron
chrI	2073332	A	Y37E3.10	sense	intron
chrI	2076412	A	Y37E3.10	sense	intron
chrI	2076415	A	Y37E3.10	sense	intron
chrI	2076420	A	Y37E3.10	sense	intron
chrI	2076485	A	Y37E3.10	sense	intron
chrI	2076489	A	Y37E3.10	sense	intron
chrI	2076610	A	Y37E3.10	sense	intron
chrI	2076613	A	Y37E3.10	sense	intron
chrI	2076623	A	Y37E3.10	sense	intron
chrI	2076632	A	Y37E3.10	sense	intron
chrI	2076633	A	Y37E3.10	sense	intron
chrI	2076642	A	Y37E3.10	sense	intron
chrI	2076643	A	Y37E3.10	sense	intron
chrI	2076647	A	Y37E3.10	sense	intron
chrI	2076648	A	Y37E3.10	sense	intron
chrI	2076705	A	Y37E3.10	sense	3utr
chrI	2076769	A	Y37E3.10	sense	3utr
chrI	2078031	T	ND	NA	intergenic
chrI	2078447	A	ND	NA	intergenic
chrI	2078748	A	ND	NA	intergenic
chrI	2078749	A	ND	NA	intergenic
chrI	2080298	A	Y37E3.11	sense	intron
chrI	2080558	A	Y37E3.11	sense	intron
chrI	2080559	A	Y37E3.11	sense	intron
chrI	2080570	A	Y37E3.11	sense	intron
chrI	2081349	T	Y37E3.11	sense	intron
chrI	2081475	A	Y37E3.11	sense	intron
chrI	2081478	A	Y37E3.11	sense	intron
chrI	2081520	A	Y37E3.11	sense	intron
chrI	2081522	A	Y37E3.11	sense	intron
chrI	2081565	A	Y37E3.11	sense	intron
chrI	2081674	A	Y37E3.11	sense	intron
chrI	2081689	A	Y37E3.11	sense	intron
chrI	2081719	A	Y37E3.11	sense	intron
chrI	2081767	A	Y37E3.11	sense	intron
chrI	2081768	A	Y37E3.11	sense	intron
chrI	2081777	A	Y37E3.11	sense	intron
chrI	2082418	A	Y37E3.11	sense	intron
chrI	2082419	A	Y37E3.11	sense	intron
chrI	2082432	A	Y37E3.11	sense	intron
chrI	2082433	A	Y37E3.11	sense	intron
chrI	2082503	A	Y37E3.11	sense	intron
chrI	2082517	A	Y37E3.11	sense	intron
chrI	2082694	A	Y37E3.11	sense	intron
chrI	2082698	A	Y37E3.11	sense	intron
chrI	2082700	A	Y37E3.11	sense	intron
chrI	2082703	A	Y37E3.11	sense	intron
chrI	2082727	A	Y37E3.11	sense	intron
chrI	2084804	A	Y37E3.11	sense	intron
chrI	2085978	T	Y37E3.13	antisense	intron
chrI	2106075	A	npp-13	sense	intron
chrI	2113161	A	npp-13	sense	intron
chrI	21142	T	Y74C9A.4	antisense	intron
chrI	2120307	A	npp-13	sense	intron
chrI	2120308	A	npp-13	sense	intron
chrI	2120472	A	npp-13	sense	intron
chrI	2121854	T	npp-13	sense	intron
chrI	2121855	T	npp-13	sense	intron
chrI	2121857	A	npp-13	sense	intron
chrI	2122338	A	npp-13	sense	intron
chrI	2122360	A	npp-13	sense	intron
chrI	2122361	A	npp-13	sense	intron
chrI	2124323	A	ND	NA	intergenic
chrI	2129134	A	Y37E3.17	sense	intron
chrI	2129161	A	Y37E3.17	sense	intron
chrI	2129162	A	Y37E3.17	sense	intron
chrI	2140897	A	Y37E3.17	sense	intron
chrI	2140905	A	Y37E3.17	sense	intron
chrI	2143746	A	Y37E3.17	sense	intron
chrI	2144026	A	Y37E3.17	sense	intron
chrI	2162371	A	afd-1	sense	intron
chrI	2171358	A	afd-1	sense	intron
chrI	2171365	A	afd-1	sense	intron
chrI	2171366	A	afd-1	sense	intron
chrI	2171391	A	afd-1	sense	intron
chrI	2171640	A	afd-1	sense	intron
chrI	2171643	A	afd-1	sense	intron
chrI	2171645	A	afd-1	sense	intron
chrI	2204042	A	afd-1	sense	intron
chrI	2204044	A	afd-1	sense	intron
chrI	2204050	A	afd-1	sense	intron
chrI	2204051	A	afd-1	sense	intron
chrI	2219420	T	W03F11.5	sense	3utr
chrI	2253177	T	F12B6.2	sense	coding
[truncated: 13,140 more rows]

## Sheet:  embryo non-repetitive sites 
Chromosome name	Position in chromosome	Nucleotide changed	Gene name in region	Orientation of the gene	Position in gene
chrV	4134915	A	nhr-57	sense	3utr
chrV	16605189	A	Y32B12C.5	antisense	intron
chrV	2695182	A	Y45G12B.2	sense	intron
chrV	20312318	A	clec-262	sense	intron
chrV	10938391	A	F17C11.11	antisense	coding
chrV	16797725	A	W06H3.3	sense	intron
chrV	4132528	A	nhr-57	sense	intron
chrV	6795302	A	ND	NA	intergenic
chrV	4132529	A	nhr-57	sense	intron
chrV	2695217	A	Y45G12B.2	sense	intron
chrV	2695243	A	Y45G12B.2	sense	intron
chrV	18958415	A	ztf-20	antisense	3utr
chrV	2695248	A	Y45G12B.2	sense	intron
chrV	2779224	A	srj-17	sense	3utr
chrV	686169	A	ND	NA	intergenic
chrV	686174	A	ND	NA	intergenic
chrV	18028645	A	Y59A8B.6	sense	intron
chrV	686191	A	ND	NA	intergenic
chrV	686192	A	ND	NA	intergenic
chrV	686193	A	ND	NA	intergenic
chrV	18876533	A	emb-4	antisense	intron
chrV	18876535	A	emb-4	antisense	intron
chrV	19918970	A	Y60A3A.19	sense	intron
chrV	18028667	A	Y59A8B.6	sense	intron
chrV	10936444	A	F17C11.12	antisense	coding
chrV	907390	A	H24K24.4	sense	intron
chrV	10299524	A	che-12	antisense	3utr
chrV	11513989	A	C55A6.6	antisense	coding
chrV	15317126	A	nhr-246	sense	coding
chrV	19311609	A	ND	NA	intergenic
chrV	5948641	A	pst-1	sense	intron
chrV	13271181	A	ND	NA	intergenic
chrV	18028688	A	Y59A8B.6	sense	intron
chrV	18028689	A	Y59A8B.6	sense	intron
chrV	686226	A	ND	NA	intergenic
chrV	3895444	A	sre-9	sense	intron
chrV	18880662	A	emb-4	antisense	intron
chrV	20452147	A	ND	NA	intergenic
chrV	11786396	A	F55A11.7	antisense	intron
chrV	13271200	A	ND	NA	intergenic
chrV	1470626	A	tag-304	sense	intron
chrV	13271209	A	ND	NA	intergenic
chrV	991403	A	unc-34	sense	intron
chrV	907436	A	H24K24.4	sense	intron
chrV	5948786	A	pst-1	sense	intron
chrV	19312814	A	ND	NA	intergenic
chrV	6418607	A	T05H4.10	antisense	intron
chrV	991411	A	unc-34	sense	intron
chrV	3895480	A	sre-9	sense	intron
chrV	6418617	A	T05H4.10	antisense	intron
chrV	17970701	A	snx-6	antisense	intron
chrV	5273788	A	ND	NA	intergenic
chrV	6418623	A	T05H4.10	antisense	intron
chrV	2195651	A	nhr-13	sense	intron
chrV	12056609	A	R07B7.2	antisense	3utr
chrV	11503816	A	C55A6.1	antisense	3utr
chrV	6418634	A	T05H4.10	antisense	intron
chrV	18927819	A	ptr-22	antisense	coding
chrV	6113485	A	F17A9.2	sense	intron
chrV	991438	A	unc-34	sense	intron
chrV	686291	A	ND	NA	intergenic
chrV	686292	A	ND	NA	intergenic
chrV	686293	A	ND	NA	intergenic
chrV	18407648	A	ZK262.12	sense	3utr
chrV	10236137	A	C12D8.1	antisense	3utr
chrV	1999082	A	alh-5	antisense	coding
chrV	5050605	A	pqn-51	sense	intron
chrV	19228912	A	str-81	antisense	intron
chrV	6418673	A	T05H4.10	antisense	intron
chrV	1931508	A	ND	NA	intergenic
chrV	686325	A	ND	NA	intergenic
chrV	5050614	A	pqn-51	sense	intron
chrV	5050615	A	pqn-51	sense	intron
chrV	6418684	A	T05H4.10	antisense	intron
chrV	6418685	A	T05H4.10	antisense	intron
chrV	6418686	A	T05H4.10	antisense	intron
chrV	1220865	A	ND	NA	intergenic
chrV	1220866	A	ND	NA	intergenic
chrV	16558339	A	Y32B12B.4	sense	intron
chrV	1931526	A	ND	NA	intergenic
chrV	20312332	A	clec-262	sense	intron
chrV	12843279	A	C44H9.6	antisense	coding
chrV	4628184	A	F54D11.2	sense	intron
chrV	20429074	A	fce-2	sense	intron
chrV	19321945	A	C43D7.4	antisense	intron
chrV	20429084	A	fce-2	sense	intron
chrV	19228957	A	str-81	antisense	intron
chrV	19917086	A	Y60A3A.19	sense	intron
chrV	19917087	A	Y60A3A.19	sense	intron
chrV	17973537	A	snx-6	antisense	intron
chrV	18047268	A	ebp-1	sense	intron
chrV	18702044	A	Y69H2.9	sense	intron
chrV	14416172	A	nxf-2	antisense	3utr
chrV	19892528	A	gly-4	antisense	coding
chrV	20429192	A	fce-2	sense	intron
chrV	20093234	A	sec-23	sense	intron
chrV	20779315	A	ND	NA	intergenic
chrV	6421106	A	T05H4.10	antisense	intron
chrV	1470779	A	tag-304	sense	intron
chrV	20093322	A	sec-23	sense	intron
chrV	18002240	A	ND	NA	intergenic
chrV	686401	A	ND	NA	intergenic
chrV	686402	A	ND	NA	intergenic
chrV	4835041	A	C37H5.5	sense	intron
chrV	1470792	A	tag-304	sense	intron
chrV	686409	A	ND	NA	intergenic
chrV	19917197	A	Y60A3A.19	sense	intron
chrV	18104656	A	par-4	sense	intron
chrV	1470805	A	tag-304	sense	intron
chrV	686427	A	ND	NA	intergenic
chrV	1165663	A	ND	NA	intergenic
chrV	20429157	A	fce-2	sense	intron
chrV	20429201	A	fce-2	sense	intron
chrV	18104684	A	par-4	sense	intron
chrV	17977709	A	snx-6	antisense	intron
chrV	20429167	A	fce-2	sense	intron
chrV	20429171	A	fce-2	sense	intron
chrV	20429173	A	fce-2	sense	intron
chrV	18104695	A	par-4	sense	intron
chrV	18784632	A	Y17D7B.10	sense	intron
chrV	17977721	A	snx-6	antisense	intron
chrV	19917181	A	Y60A3A.19	sense	intron
chrV	991615	A	unc-34	sense	intron
chrV	991616	A	unc-34	sense	intron
chrV	991623	A	unc-34	sense	intron
chrV	18104712	A	par-4	sense	intron
chrV	4204938	A	H43I07.1	sense	intron
chrV	20429195	A	fce-2	sense	intron
chrV	19917196	A	Y60A3A.19	sense	intron
chrV	20251023	A	mdt-17	antisense	intron
chrV	20251024	A	mdt-17	antisense	intron
chrV	992664	A	unc-34	sense	intron
chrV	18784658	A	Y17D7B.10	sense	intron
chrV	18104724	A	par-4	sense	intron
chrV	1152750	A	ND	NA	intergenic
chrV	1375641	A	rga-4	antisense	intron
chrV	20245503	A	psa-1	antisense	intron
chrV	20429215	A	fce-2	sense	intron
chrV	19917217	A	Y60A3A.19	sense	intron
chrV	10322338	A	crm-1	antisense	3utr
chrV	18995619	A	Y39B6A.36	sense	intron
chrV	20824484	A	gcy-22	antisense	intron
chrV	16544169	A	Y32B12B.2	sense	intron
chrV	991658	A	unc-34	sense	intron
chrV	991659	A	unc-34	sense	intron
chrV	9171372	A	B0222.9	antisense	intron
chrV	991661	A	unc-34	sense	intron
chrV	18104760	A	par-4	sense	intron
chrV	1642941	A	Y46H3D.1	sense	coding
chrV	16544192	A	Y32B12B.2	sense	intron
chrV	16544193	A	Y32B12B.2	sense	intron
chrV	2646466	A	ND	NA	intergenic
chrV	18995652	A	Y39B6A.36	sense	intron
chrV	4209093	A	ND	NA	intergenic
chrV	4248006	A	srt-13	antisense	coding
chrV	20898249	A	unc-80	sense	intron
chrV	5050826	A	pqn-51	sense	intron
chrV	5050827	A	pqn-51	sense	intron
chrV	16557914	A	Y32B12B.4	sense	intron
chrV	16544205	A	Y32B12B.2	sense	intron
chrV	20251087	A	mdt-17	antisense	intron
chrV	5050832	A	pqn-51	sense	intron
chrV	20898257	A	unc-80	sense	intron
chrV	18104786	A	par-4	sense	intron
chrV	16544211	A	Y32B12B.2	sense	intron
chrV	4129237	A	T05B4.4	sense	3utr
chrV	2646488	A	ND	NA	intergenic
chrV	18996644	A	Y39B6A.36	sense	intron
chrV	18995675	A	Y39B6A.36	sense	intron
chrV	15927774	A	pzf-1	antisense	coding
chrV	1161696	A	T21H3.5	antisense	intron
chrV	18995681	A	Y39B6A.36	sense	intron
chrV	2646498	A	ND	NA	intergenic
chrV	2646499	A	ND	NA	intergenic
chrV	3709412	A	lin-40	sense	intron
chrV	18995704	A	Y39B6A.36	sense	intron
chrV	686573	A	ND	NA	intergenic
chrV	8851957	A	ND	NA	intergenic
chrV	2646520	A	ND	NA	intergenic
chrV	2691580	A	Y45G12B.3	antisense	intron
chrV	1161725	A	T21H3.5	antisense	intron
chrV	4551166	A	ND	NA	intergenic
chrV	3709439	A	lin-40	sense	intron
chrV	2646529	A	ND	NA	intergenic
chrV	2646530	A	ND	NA	intergenic
chrV	18995627	A	Y39B6A.36	sense	intron
chrV	7897604	A	F40A3.7	antisense	coding
chrV	2646533	A	ND	NA	intergenic
chrV	924166	A	H24K24.2	sense	intron
chrV	14832138	A	ret-1	antisense	intron
chrV	6421007	A	T05H4.10	antisense	intron
chrV	686168	A	ND	NA	intergenic
chrV	2646547	A	ND	NA	intergenic
chrV	2691606	A	Y45G12B.3	antisense	intron
chrV	10070551	A	nhr-192	antisense	coding
chrV	2646552	A	ND	NA	intergenic
chrV	18899483	A	nhr-243	antisense	coding
chrV	2646556	A	ND	NA	intergenic
chrV	17941594	A	dpy-21	antisense	intron
chrV	924191	A	H24K24.2	sense	intron
chrV	16544293	A	Y32B12B.2	sense	intron
chrV	2646566	A	ND	NA	intergenic
chrV	2691624	A	Y45G12B.3	antisense	intron
chrV	4551211	A	ND	NA	intergenic
chrV	4551212	A	ND	NA	intergenic
chrV	16819634	A	T20B3.1	sense	intron
chrV	16544302	A	Y32B12B.2	sense	intron
chrV	57903	A	ND	NA	intergenic
chrV	20251184	A	mdt-17	antisense	intron
chrV	16544310	A	Y32B12B.2	sense	intron
chrV	2195210	A	nhr-13	sense	intron
chrV	16544319	A	Y32B12B.2	sense	intron
chrV	2646593	A	ND	NA	intergenic
chrV	2646595	A	ND	NA	intergenic
chrV	17977926	A	snx-6	antisense	intron
chrV	2646600	A	ND	NA	intergenic
chrV	2646603	A	ND	NA	intergenic
chrV	13181517	A	ND	NA	intergenic
chrV	18487887	A	ND	NA	intergenic
chrV	20701776	A	F53F8.5	antisense	coding
chrV	2646610	A	ND	NA	intergenic
chrV	4129365	A	T05B4.4	sense	3utr
chrV	995928	A	ND	NA	intergenic
chrV	10601050	A	scpl-4	sense	intron
chrV	686685	A	ND	NA	intergenic
chrV	16544350	A	Y32B12B.2	sense	intron
chrV	6421093	A	T05H4.10	antisense	intron
chrV	6421094	A	T05H4.10	antisense	intron
chrV	686696	A	ND	NA	intergenic
chrV	19114770	A	pro-3	antisense	intron
chrV	2646638	A	ND	NA	intergenic
chrV	688573	A	H25P19.1	sense	intron
chrV	5479024	A	ND	NA	intergenic
chrV	5479025	A	ND	NA	intergenic
chrV	5479026	A	ND	NA	intergenic
chrV	8532755	A	his-8	antisense	coding
chrV	686711	A	ND	NA	intergenic
chrV	19731066	A	Y116F11A.1	sense	intron
chrV	18995839	A	Y39B6A.36	sense	intron
chrV	12931716	A	T16G1.2	sense	intron
chrV	686726	A	ND	NA	intergenic
chrV	19919297	A	Y60A3A.19	sense	intron
chrV	6421133	A	T05H4.10	antisense	intron
chrV	6421134	A	T05H4.10	antisense	intron
chrV	20251757	A	mdt-17	antisense	intron
chrV	2646673	A	ND	NA	intergenic
chrV	686738	A	ND	NA	intergenic
chrV	5479061	A	ND	NA	intergenic
chrV	20093590	A	sec-23	sense	intron
chrV	20245273	A	psa-1	antisense	intron
chrV	6421147	A	T05H4.10	antisense	intron
chrV	2646686	A	ND	NA	intergenic
chrV	12931744	A	T16G1.2	sense	intron
chrV	2646692	A	ND	NA	intergenic
chrV	6167207	A	ttn-1	antisense	coding
chrV	5163709	A	abu-7	antisense	coding
chrV	3314366	A	arrd-19	antisense	coding
chrV	2646726	A	ND	NA	intergenic
chrV	19918603	A	Y60A3A.19	sense	intron
chrV	2646740	A	ND	NA	intergenic
chrV	2646741	A	ND	NA	intergenic
chrV	9777881	A	F46B6.4	antisense	coding
chrV	18995930	A	Y39B6A.36	sense	intron
chrV	2646749	A	ND	NA	intergenic
chrV	2646750	A	ND	NA	intergenic
chrV	18995938	A	Y39B6A.36	sense	intron
chrV	918247	A	ND	NA	intergenic
chrV	992380	A	unc-34	sense	intron
chrV	2646762	A	ND	NA	intergenic
chrV	2646768	A	ND	NA	intergenic
chrV	8532721	A	his-8	antisense	coding
chrV	18104787	A	par-4	sense	intron
chrV	2646772	A	ND	NA	intergenic
chrV	4551415	A	ND	NA	intergenic
chrV	2646776	A	ND	NA	intergenic
chrV	16818941	A	T20B3.1	sense	intron
chrV	4551424	A	ND	NA	intergenic
chrV	686849	A	ND	NA	intergenic
chrV	4551430	A	ND	NA	intergenic
chrV	20245255	A	psa-1	antisense	intron
chrV	20245257	A	psa-1	antisense	intron
chrV	20245260	A	psa-1	antisense	intron
chrV	1289346	A	ND	NA	intergenic
chrV	16546575	A	Y32B12B.2	sense	intron
chrV	8532754	A	his-8	antisense	coding
chrV	2646803	A	ND	NA	intergenic
chrV	686869	A	ND	NA	intergenic
chrV	5686038	A	F25B4.7	antisense	coding
chrV	2646808	A	ND	NA	intergenic
chrV	2646809	A	ND	NA	intergenic
chrV	16818971	A	T20B3.1	sense	intron
chrV	2646812	A	ND	NA	intergenic
chrV	20093725	A	sec-23	sense	intron
chrV	18996000	A	Y39B6A.36	sense	intron
chrV	2646817	A	ND	NA	intergenic
chrV	2646818	A	ND	NA	intergenic
chrV	10128166	A	aos-1	antisense	intron
chrV	20093187	A	sec-23	sense	intron
chrV	5479218	A	ND	NA	intergenic
chrV	996147	A	ND	NA	intergenic
chrV	996148	A	ND	NA	intergenic
chrV	2646836	A	ND	NA	intergenic
chrV	6418571	A	T05H4.10	antisense	intron
chrV	4551492	A	ND	NA	intergenic
chrV	5479237	A	ND	NA	intergenic
chrV	4551495	A	ND	NA	intergenic
chrV	5479241	A	ND	NA	intergenic
chrV	5479242	A	ND	NA	intergenic
chrV	18242381	A	R10E8.1	antisense	3utr
chrV	7469903	A	F25E5.1	sense	intron
chrV	5618514	A	memb-2	antisense	coding
chrV	2646867	A	ND	NA	intergenic
chrV	18996052	A	Y39B6A.36	sense	intron
chrV	2698070	A	Y45G12B.2	sense	intron
chrV	996189	A	ND	NA	intergenic
chrV	996190	A	ND	NA	intergenic
chrV	996197	A	ND	NA	intergenic
chrV	14195558	A	ZC376.7	sense	intron
chrV	996199	A	ND	NA	intergenic
chrV	18105193	A	par-4	sense	intron
chrV	20093462	A	sec-23	sense	intron
chrV	2699212	A	nuo-5	sense	intron
chrV	16819054	A	T20B3.1	sense	intron
chrV	3709809	A	lin-40	sense	intron
chrV	3895443	A	sre-9	sense	intron
chrV	16369470	A	W08G11.3	sense	intron
chrV	996214	A	ND	NA	intergenic
chrV	20251511	A	mdt-17	antisense	intron
chrV	20251513	A	mdt-17	antisense	intron
chrV	6421371	A	T05H4.10	antisense	intron
chrV	6421372	A	T05H4.10	antisense	intron
chrV	996227	A	ND	NA	intergenic
chrV	16819079	A	T20B3.1	sense	intron
chrV	3895106	A	sre-9	sense	intron
chrV	12073870	A	R07B7.6	antisense	coding
chrV	20093840	A	sec-23	sense	intron
chrV	2195267	A	nhr-13	sense	intron
chrV	686997	A	ND	NA	intergenic
chrV	20245267	A	psa-1	antisense	intron
chrV	687001	A	ND	NA	intergenic
chrV	1289115	A	ND	NA	intergenic
chrV	996253	A	ND	NA	intergenic
chrV	687006	A	ND	NA	intergenic
chrV	6421409	A	T05H4.10	antisense	intron
chrV	6421411	A	T05H4.10	antisense	intron
chrV	922535	A	H24K24.2	sense	intron
chrV	922536	A	H24K24.2	sense	intron
chrV	11365290	A	dop-5	antisense	coding
chrV	911175	A	H24K24.4	sense	intron
chrV	20251565	A	mdt-17	antisense	intron
chrV	20251805	A	mdt-17	antisense	intron
chrV	1973168	A	acs-3	sense	intron
chrV	6421425	A	T05H4.10	antisense	intron
chrV	20251572	A	mdt-17	antisense	intron
chrV	12751689	A	C15C8.8	antisense	3utr
chrV	18105275	A	par-4	sense	intron
chrV	7869373	A	F40A3.5	antisense	coding
chrV	20093886	A	sec-23	sense	intron
chrV	922560	A	H24K24.2	sense	intron
chrV	12817352	A	ZC443.4	antisense	3utr
chrV	18105293	A	par-4	sense	intron
chrV	18105294	A	par-4	sense	intron
chrV	351184	A	atg-9	sense	intron
chrV	351185	A	atg-9	sense	intron
chrV	351186	A	atg-9	sense	intron
chrV	351189	A	atg-9	sense	intron
chrV	19197433	A	pph-5	sense	intron
chrV	12352472	A	ND	NA	intergenic
chrV	922595	A	H24K24.2	sense	intron
chrV	911185	A	H24K24.4	sense	intron
chrV	19229677	A	str-81	antisense	intron
chrV	992255	A	unc-34	sense	intron
chrV	197632	A	Y108G3AL.7	sense	intron
chrV	20251649	A	mdt-17	antisense	intron
chrV	299179	A	F33E11.2	sense	intron
chrV	19115012	A	pro-3	antisense	intron
chrV	992262	A	unc-34	sense	intron
chrV	19115018	A	pro-3	antisense	intron
chrV	20093101	A	sec-23	sense	intron
chrV	19311632	A	ND	NA	intergenic
chrV	18995715	A	Y39B6A.36	sense	intron
chrV	20093102	A	sec-23	sense	intron
chrV	12241948	A	ND	NA	intergenic
chrV	9707354	A	xbx-6	sense	intron
chrV	1819681	A	gly-7	antisense	intron
chrV	992293	A	unc-34	sense	intron
chrV	992295	A	unc-34	sense	intron
chrV	20093993	A	sec-23	sense	intron
chrV	19115052	A	pro-3	antisense	intron
chrV	20093998	A	sec-23	sense	intron
chrV	18995626	A	Y39B6A.36	sense	intron
chrV	20094007	A	sec-23	sense	intron
chrV	18996285	A	Y39B6A.36	sense	intron
chrV	19321922	A	C43D7.4	antisense	intron
chrV	390211	A	ZK6.6	sense	intron
chrV	390212	A	ZK6.6	sense	intron
chrV	3581001	A	T22F3.3	sense	intron
chrV	390220	A	ZK6.6	sense	intron
chrV	390223	A	ZK6.6	sense	intron
chrV	18784440	A	Y17D7B.10	sense	intron
chrV	390226	A	ZK6.6	sense	intron
chrV	390227	A	ZK6.6	sense	intron
chrV	18996309	A	Y39B6A.36	sense	intron
chrV	6421075	A	T05H4.10	antisense	intron
chrV	390234	A	ZK6.6	sense	intron
chrV	18996316	A	Y39B6A.36	sense	intron
chrV	20094046	A	sec-23	sense	intron
chrV	17941599	A	dpy-21	antisense	intron
chrV	992352	A	unc-34	sense	intron
chrV	992353	A	unc-34	sense	intron
chrV	390242	A	ZK6.6	sense	intron
chrV	19246267	A	str-81	antisense	intron
chrV	16553061	A	ND	NA	intergenic
chrV	992358	A	unc-34	sense	intron
chrV	390254	A	ZK6.6	sense	intron
chrV	12745187	A	C15C8.4	antisense	3utr
chrV	20251082	A	mdt-17	antisense	intron
chrV	390258	A	ZK6.6	sense	intron
chrV	20251765	A	mdt-17	antisense	intron
chrV	20251766	A	mdt-17	antisense	intron
chrV	17941623	A	dpy-21	antisense	intron
chrV	992376	A	unc-34	sense	intron
chrV	390266	A	ZK6.6	sense	intron
chrV	390267	A	ZK6.6	sense	intron
chrV	390268	A	ZK6.6	sense	intron
chrV	992384	A	unc-34	sense	intron
chrV	390274	A	ZK6.6	sense	intron
chrV	2595973	A	ND	NA	intergenic
chrV	992391	A	unc-34	sense	intron
chrV	20251784	A	mdt-17	antisense	intron
chrV	18996361	A	Y39B6A.36	sense	intron
chrV	4207755	A	H43I07.1	sense	intron
chrV	5537645	A	syp-2	sense	3utr
chrV	6418627	A	T05H4.10	antisense	intron
chrV	20251796	A	mdt-17	antisense	intron
chrV	20251800	A	mdt-17	antisense	intron
chrV	20251163	A	mdt-17	antisense	intron
chrV	1289385	A	egl-2	antisense	3utr
chrV	1289386	A	egl-2	antisense	3utr
chrV	18995741	A	Y39B6A.36	sense	intron
chrV	18996401	A	Y39B6A.36	sense	intron
chrV	20251826	A	mdt-17	antisense	intron
chrV	19246263	A	str-81	antisense	intron
chrV	16544287	A	Y32B12B.2	sense	intron
chrV	5948628	A	pst-1	sense	intron
chrV	8006873	A	Y97E10AR.3	antisense	coding
chrV	5948639	A	pst-1	sense	intron
chrV	20919520	A	pbo-5	sense	intron
chrV	1209569	A	Y50D4A.1	sense	intron
chrV	1209570	A	Y50D4A.1	sense	intron
chrV	5948643	A	pst-1	sense	intron
chrV	20251174	A	mdt-17	antisense	intron
chrV	20919526	A	pbo-5	sense	intron
chrV	9559275	A	rgef-1	antisense	coding
chrV	4627697	A	F54D11.2	sense	intron
chrV	18996466	A	Y39B6A.36	sense	intron
chrV	4627704	A	F54D11.2	sense	intron
chrV	10144980	A	C51E3.8	antisense	5utr
chrV	4627709	A	F54D11.2	sense	intron
chrV	5948675	A	pst-1	sense	intron
chrV	2652307	A	W02H5.8	antisense	intron
chrV	8905260	A	K06C4.9	sense	coding
chrV	20093827	A	sec-23	sense	intron
chrV	4627737	A	F54D11.2	sense	intron
chrV	16819482	A	T20B3.1	sense	intron
chrV	64797	A	daam-1	antisense	intron
chrV	64798	A	daam-1	antisense	intron
chrV	4627745	A	F54D11.2	sense	intron
chrV	18095345	A	slr-2	sense	intron
chrV	4627756	A	F54D11.2	sense	intron
chrV	4627757	A	F54D11.2	sense	intron
chrV	64816	A	daam-1	antisense	intron
chrV	4627768	A	F54D11.2	sense	intron
chrV	4627770	A	F54D11.2	sense	intron
chrV	20919519	A	pbo-5	sense	intron
chrV	64830	A	daam-1	antisense	intron
chrV	6421828	A	T05H4.10	antisense	intron
chrV	18038085	A	Y59A8B.6	sense	intron
chrV	64839	A	daam-1	antisense	intron
chrV	4627784	A	F54D11.2	sense	intron
chrV	64843	A	daam-1	antisense	intron
chrV	19919170	A	Y60A3A.19	sense	intron
chrV	64849	A	daam-1	antisense	intron
chrV	4627794	A	F54D11.2	sense	intron
chrV	15164756	A	T09F5.12	antisense	3utr
chrV	4627800	A	F54D11.2	sense	intron
chrV	4627801	A	F54D11.2	sense	intron
chrV	3575134	A	grl-27	antisense	coding
chrV	4627808	A	F54D11.2	sense	intron
chrV	2194786	A	nhr-13	sense	intron
chrV	1375588	A	rga-4	antisense	intron
chrV	992613	A	unc-34	sense	intron
chrV	4627816	A	F54D11.2	sense	intron
chrV	14982506	A	xbx-1	sense	coding
chrV	2194795	A	nhr-13	sense	intron
chrV	5502317	A	T05C3.2	sense	intron
chrV	4627824	A	F54D11.2	sense	intron
chrV	4627825	A	F54D11.2	sense	intron
chrV	4627826	A	F54D11.2	sense	intron
chrV	2195006	A	nhr-13	sense	intron
chrV	992632	A	unc-34	sense	intron
chrV	18097529	A	slr-2	sense	intron
chrV	4627837	A	F54D11.2	sense	intron
chrV	4627838	A	F54D11.2	sense	intron
chrV	877952	A	T02B11.8	antisense	intron
chrV	18002261	A	ND	NA	intergenic
chrV	18851774	A	nhr-230	sense	intron
chrV	5948812	A	pst-1	sense	intron
chrV	4627857	A	F54D11.2	sense	intron
chrV	4627858	A	F54D11.2	sense	intron
chrV	2069908	A	Y40B10A.9	antisense	coding
chrV	20549014	A	Y38H6C.20	antisense	intron
chrV	1375640	A	rga-4	antisense	intron
chrV	2581913	A	C29G2.3	sense	intron
chrV	992667	A	unc-34	sense	intron
chrV	3749786	A	ND	NA	intergenic
chrV	992673	A	unc-34	sense	intron
chrV	13987236	A	F58E10.1	antisense	3utr
chrV	4558247	A	ND	NA	intergenic
chrV	4627881	A	F54D11.2	sense	intron
chrV	16819627	A	T20B3.1	sense	intron
chrV	992684	A	unc-34	sense	intron
chrV	18996654	A	Y39B6A.36	sense	intron
chrV	14453320	A	bmk-1	antisense	3utr
chrV	4627890	A	F54D11.2	sense	intron
chrV	1375667	A	rga-4	antisense	intron
chrV	18996667	A	Y39B6A.36	sense	intron
chrV	992700	A	unc-34	sense	intron
chrV	992701	A	unc-34	sense	intron
chrV	18703806	A	Y69H2.9	sense	intron
chrV	2704832	A	nuo-5	sense	intron
chrV	2643396	A	W02H5.9	sense	intron
chrV	4627910	A	F54D11.2	sense	intron
chrV	4627911	A	F54D11.2	sense	intron
chrV	11763147	A	F55A11.1	antisense	3utr
chrV	4627924	A	F54D11.2	sense	intron
chrV	4627925	A	F54D11.2	sense	intron
chrV	4627930	A	F54D11.2	sense	intron
chrV	9786849	A	ND	NA	intergenic
chrV	19919175	A	Y60A3A.19	sense	intron
chrV	20919537	A	pbo-5	sense	intron
chrV	4582893	A	Y61A9LA.3	sense	intron
chrV	687016	A	ND	NA	intergenic
chrV	5468755	A	ZC317.7	antisense	3utr
chrV	17970677	A	snx-6	antisense	intron
chrV	18996729	A	Y39B6A.36	sense	intron
chrV	992762	A	unc-34	sense	intron
chrV	19197435	A	pph-5	sense	intron
chrV	18996734	A	Y39B6A.36	sense	intron
chrV	19197444	A	pph-5	sense	intron
chrV	922540	A	H24K24.2	sense	intron
chrV	17970699	A	snx-6	antisense	intron
chrV	17970700	A	snx-6	antisense	intron
chrV	5948674	A	pst-1	sense	intron
chrV	17970703	A	snx-6	antisense	intron
chrV	17970704	A	snx-6	antisense	intron
chrV	2195032	A	nhr-13	sense	intron
chrV	17970706	A	snx-6	antisense	intron
chrV	19727620	A	Y116F11A.6	sense	coding
chrV	16369182	A	W08G11.3	sense	intron
chrV	16369183	A	W08G11.3	sense	intron
chrV	2643489	A	W02H5.9	sense	intron
chrV	2643490	A	W02H5.9	sense	intron
chrV	18415140	A	ZK262.3	sense	coding
chrV	13049382	A	W07G4.8	antisense	coding
chrV	2646621	A	ND	NA	intergenic
chrV	17977950	A	snx-6	antisense	intron
chrV	642622	A	nhr-190	antisense	intron
chrV	18417233	A	ND	NA	intergenic
chrV	4628056	A	F54D11.2	sense	intron
chrV	962140	A	sqv-6	antisense	intron
chrV	20346461	A	Y38H6A.3	sense	intron
chrV	20346462	A	Y38H6A.3	sense	intron
chrV	8894052	A	ND	NA	intergenic
chrV	10601062	A	scpl-4	sense	intron
chrV	4628072	A	F54D11.2	sense	intron
chrV	12693099	A	K10C8.1	antisense	coding
chrV	7380590	A	C03G6.17	antisense	intron
chrV	18038389	A	Y59A8B.6	sense	intron
chrV	20346503	A	Y38H6A.3	sense	intron
chrV	4628108	A	F54D11.2	sense	intron
chrV	4628109	A	F54D11.2	sense	intron
chrV	925347	A	H24K24.2	sense	intron
chrV	925348	A	H24K24.2	sense	intron
chrV	4628134	A	F54D11.2	sense	intron
chrV	4628141	A	F54D11.2	sense	intron
chrV	4628143	A	F54D11.2	sense	intron
chrV	925360	A	H24K24.2	sense	intron
chrV	925361	A	H24K24.2	sense	intron
chrV	925365	A	H24K24.2	sense	intron
chrV	17276602	A	srh-262	sense	intron
chrV	1568447	A	ND	NA	intergenic
chrV	4628163	A	F54D11.2	sense	intron
chrV	20093217	A	sec-23	sense	intron
chrV	4628169	A	F54D11.2	sense	intron
chrV	18702029	A	Y69H2.9	sense	intron
chrV	18702033	A	Y69H2.9	sense	intron
chrV	4628178	A	F54D11.2	sense	intron
chrV	4628183	A	F54D11.2	sense	intron
chrV	198360	A	Y108G3AL.7	sense	intron
chrV	198361	A	Y108G3AL.7	sense	intron
chrV	18784067	A	Y17D7B.10	sense	intron
chrV	4628188	A	F54D11.2	sense	intron
chrV	103376	A	ND	NA	intergenic
chrV	1210094	A	Y50D4A.1	sense	intron
chrV	4628214	A	F54D11.2	sense	intron
chrV	7347967	A	nhr-147	sense	coding
chrV	19918596	A	Y60A3A.19	sense	intron
chrV	2195206	A	nhr-13	sense	intron
chrV	19228972	A	str-81	antisense	intron
chrV	4628234	A	F54D11.2	sense	intron
chrV	4628235	A	F54D11.2	sense	intron
chrV	19229656	A	str-81	antisense	intron
chrV	4628246	A	F54D11.2	sense	intron
chrV	8684501	A	cln-3.3	sense	intron
chrV	4628256	A	F54D11.2	sense	intron
chrV	2582305	A	C29G2.3	sense	intron
chrV	4628258	A	F54D11.2	sense	intron
chrV	16369443	A	W08G11.3	sense	intron
chrV	16369444	A	W08G11.3	sense	intron
chrV	8433448	A	F52E1.13	antisense	coding
chrV	4628267	A	F54D11.2	sense	intron
chrV	7348018	A	nhr-147	sense	coding
chrV	4628279	A	F54D11.2	sense	intron
chrV	16369467	A	W08G11.3	sense	intron
chrV	911164	A	H24K24.4	sense	intron
chrV	175934	A	Y108G3AL.2	sense	intron
chrV	3895107	A	sre-9	sense	intron
chrV	911174	A	H24K24.4	sense	intron
chrV	44875	A	ND	NA	intergenic
chrV	10907468	A	F32D8.10	antisense	coding
chrV	19918669	A	Y60A3A.19	sense	intron
chrV	4628303	A	F54D11.2	sense	3utr
chrV	4628304	A	F54D11.2	sense	3utr
chrV	4628305	A	F54D11.2	sense	3utr
chrV	44884	A	ND	NA	intergenic
chrV	9707349	A	xbx-6	sense	intron
chrV	911192	A	H24K24.4	sense	intron
chrV	911193	A	H24K24.4	sense	intron
chrV	911194	A	H24K24.4	sense	intron
chrV	13539179	A	ND	NA	intergenic
chrV	2109293	A	ckb-4	antisense	coding
chrV	481137	A	nhr-130	antisense	coding
chrV	20094042	A	sec-23	sense	intron
chrV	13332341	A	nhr-168	antisense	coding
chrV	9783166	A	F46B6.6	antisense	3utr
chrV	18995861	A	Y39B6A.36	sense	intron
chrV	3749761	A	ND	NA	intergenic
chrV	3749764	A	ND	NA	intergenic
chrV	3749770	A	ND	NA	intergenic
chrV	911244	A	H24K24.4	sense	intron
chrV	9228610	A	F07C3.3	antisense	intron
chrV	911246	A	H24K24.4	sense	intron
chrV	11089807	A	Y42A5A.1	sense	intron
chrV	911251	A	H24K24.4	sense	intron
chrV	18702034	A	Y69H2.9	sense	intron
chrV	6418329	A	T05H4.10	antisense	intron
chrV	911258	A	H24K24.4	sense	intron
chrV	18028242	A	Y59A8B.6	sense	intron
chrV	3749795	A	ND	NA	intergenic
chrV	18876401	A	emb-4	antisense	intron
chrV	9228615	A	F07C3.3	antisense	intron
chrV	12591021	A	C14C10.2	antisense	coding
chrV	911284	A	H24K24.4	sense	intron
chrV	13680565	A	ccz-1	sense	intron
chrV	1470793	A	tag-304	sense	intron
chrV	18044859	A	ebp-1	sense	intron
chrV	911294	A	H24K24.4	sense	intron
chrV	911295	A	H24K24.4	sense	intron
chrV	18851779	A	nhr-230	sense	intron
chrV	18044868	A	ebp-1	sense	intron
chrV	9707373	A	xbx-6	sense	intron
chrV	6418376	A	T05H4.10	antisense	intron
chrV	7710667	A	ND	NA	intergenic
chrV	4689868	A	K03B4.1	sense	intron
chrV	6418385	A	T05H4.10	antisense	intron
chrV	2699223	A	nuo-5	sense	intron
chrV	15515611	A	lgc-31	antisense	intron
chrV	19229690	A	str-81	antisense	intron
chrV	18581475	A	Y51A2D.28	antisense	5utr
chrV	3895269	A	sre-9	sense	intron
chrV	3895270	A	sre-9	sense	intron
chrV	5948753	A	pst-1	sense	intron
chrV	3895276	A	sre-9	sense	intron
chrV	3895280	A	sre-9	sense	intron
chrV	3895281	A	sre-9	sense	intron
chrV	18876406	A	emb-4	antisense	intron
chrV	4689911	A	K03B4.1	sense	intron
chrV	20093951	A	sec-23	sense	intron
chrV	16605180	A	Y32B12C.5	antisense	intron
chrV	16605182	A	Y32B12C.5	antisense	intron
chrV	16605183	A	Y32B12C.5	antisense	intron
chrII	13475840	A	ND	NA	intergenic
chrII	13726720	A	bub-3	sense	intron
chrII	14066347	A	ND	NA	intergenic
chrII	432132	A	C24H12.3	sense	intron
chrII	7573602	A	ND	NA	intergenic
chrII	432134	A	C24H12.3	sense	intron
chrII	13119148	A	F29C12.4	sense	intron
chrII	15230986	A	spsb-2	sense	intron
chrII	1056779	A	ND	NA	intergenic
chrII	1056780	A	ND	NA	intergenic
chrII	11552429	A	ND	NA	intergenic
chrII	5914643	A	cgt-3	sense	intron
chrII	4126740	A	rhgf-2	sense	intron
chrII	315413	A	K01A2.3	sense	intron
chrII	8679451	A	C34C6.2	antisense	3utr
chrII	4126042	A	rhgf-2	sense	intron
chrII	432158	A	C24H12.3	sense	intron
chrII	15122463	A	arp-1	sense	intron
chrII	434209	A	C24H12.12	antisense	intron
chrII	1864027	A	ND	NA	intergenic
chrII	14254118	A	Y54G11A.2	sense	intron
chrII	4126759	A	rhgf-2	sense	intron
chrII	3903836	A	F53C3.3	sense	intron
chrII	432171	A	C24H12.3	sense	intron
chrII	13568044	A	Y48E1B.5	antisense	3utr
chrII	432173	A	C24H12.3	sense	intron
chrII	5689391	A	ND	NA	intergenic
chrII	4126771	A	rhgf-2	sense	intron
chrII	13897054	A	mcd-1	sense	intron
chrII	4126778	A	rhgf-2	sense	intron
chrII	4352351	A	H20J04.9	sense	intron
chrII	13475900	A	ND	NA	intergenic
chrII	13475902	A	ND	NA	intergenic
chrII	454719	A	W10D9.1	sense	intron
chrII	882753	A	ND	NA	intergenic
chrII	309314	A	K01A2.4	sense	intron
chrII	454724	A	W10D9.1	sense	intron
chrII	6702433	A	rpy-1	antisense	3utr
chrII	12200008	A	ND	NA	intergenic
chrII	13383753	A	Y48C3A.12	sense	intron
chrII	14066442	A	ND	NA	intergenic
chrII	7479017	A	ND	NA	intergenic
chrII	882764	A	ND	NA	intergenic
chrII	2140595	A	ND	NA	intergenic
chrII	4126800	A	rhgf-2	sense	intron
chrII	13475921	A	ND	NA	intergenic
chrII	13475922	A	ND	NA	intergenic
chrII	432211	A	C24H12.3	sense	intron
chrII	432212	A	C24H12.3	sense	intron
chrII	434263	A	C24H12.12	antisense	intron
chrII	12281947	A	ife-5	sense	intron
chrII	14798940	A	tbc-20	sense	intron
chrII	454752	A	W10D9.1	sense	intron
chrII	5568610	A	ND	NA	intergenic
chrII	4126819	A	rhgf-2	sense	intron
chrII	882788	A	ND	NA	intergenic
chrII	4127078	A	rhgf-2	sense	intron
chrII	4339815	A	ND	NA	intergenic
chrII	4339819	A	ND	NA	intergenic
chrII	2570353	A	F09D1.1	sense	intron
chrII	434291	A	C24H12.12	antisense	intron
chrII	454773	A	W10D9.1	sense	intron
chrII	4339830	A	ND	NA	intergenic
chrII	4339831	A	ND	NA	intergenic
chrII	4126840	A	rhgf-2	sense	intron
chrII	432253	A	C24H12.3	sense	intron
chrII	4126741	A	rhgf-2	sense	intron
chrII	13897067	A	mcd-1	sense	intron
chrII	4125718	A	rhgf-2	sense	intron
chrII	1827579	A	math-41	sense	intron
chrII	4127047	A	rhgf-2	sense	intron
chrII	995470	A	ND	NA	intergenic
chrII	3098767	A	srg-24	antisense	intron
chrII	4125772	A	rhgf-2	sense	intron
chrII	4126865	A	rhgf-2	sense	intron
chrII	995475	A	ND	NA	intergenic
chrII	7661717	A	F18A1.6	antisense	coding
chrII	995482	A	ND	NA	intergenic
chrII	1828207	A	math-41	sense	intron
chrII	315549	A	K01A2.3	sense	coding
chrII	432287	A	C24H12.3	sense	intron
chrII	3210860	A	ZC239.6	sense	3utr
chrII	13185922	A	mecr-1	antisense	3utr
chrII	434341	A	C24H12.12	antisense	intron
chrII	995494	A	ND	NA	intergenic
chrII	3098791	A	srg-24	antisense	intron
chrII	995496	A	ND	NA	intergenic
chrII	438441	A	C24H12.2	sense	intron
chrII	643243	A	K07E8.7	antisense	intron
chrII	15216813	A	spsb-1	sense	intron
chrII	995502	A	ND	NA	intergenic
chrII	432303	A	C24H12.3	sense	intron
chrII	4126899	A	rhgf-2	sense	intron
chrII	15216823	A	spsb-1	sense	intron
chrII	454841	A	W10D9.1	sense	intron
chrII	995517	A	ND	NA	intergenic
chrII	432318	A	C24H12.3	sense	intron
chrII	434367	A	C24H12.12	antisense	intron
chrII	434368	A	C24H12.12	antisense	intron
chrII	432321	A	C24H12.3	sense	intron
chrII	4126914	A	rhgf-2	sense	intron
chrII	995524	A	ND	NA	intergenic
chrII	15231175	A	spsb-2	sense	intron
chrII	995530	A	ND	NA	intergenic
chrII	7573097	A	ND	NA	intergenic
chrII	995535	A	ND	NA	intergenic
chrII	4126928	A	rhgf-2	sense	intron
chrII	432340	A	C24H12.3	sense	intron
chrII	7573717	A	ND	NA	intergenic
chrII	434390	A	C24H12.12	antisense	intron
chrII	454873	A	W10D9.1	sense	intron
chrII	995546	A	ND	NA	intergenic
chrII	7573724	A	ND	NA	intergenic
chrII	434400	A	C24H12.12	antisense	intron
chrII	4126947	A	rhgf-2	sense	intron
chrII	8535236	A	ND	NA	intergenic
chrII	434405	A	C24H12.12	antisense	intron
chrII	4126950	A	rhgf-2	sense	intron
chrII	995559	A	ND	NA	intergenic
chrII	3903868	A	F53C3.3	sense	intron
chrII	3903869	A	F53C3.3	sense	intron
chrII	434420	A	C24H12.12	antisense	intron
chrII	4127102	A	rhgf-2	sense	intron
chrII	995576	A	ND	NA	intergenic
chrII	5622009	A	C17G10.9	antisense	intron
chrII	5622010	A	C17G10.9	antisense	intron
chrII	15044860	A	asc-1	sense	intron
chrII	454909	A	W10D9.1	sense	intron
chrII	15075582	A	ND	NA	intergenic
chrII	995583	A	ND	NA	intergenic
chrII	13875456	A	ND	NA	intergenic
chrII	315649	A	K01A2.3	sense	intron
chrII	995586	A	ND	NA	intergenic
chrII	7573763	A	ND	NA	intergenic
chrII	434437	A	C24H12.12	antisense	intron
chrII	434438	A	C24H12.12	antisense	intron
chrII	432391	A	C24H12.3	sense	intron
chrII	15075594	A	ND	NA	intergenic
chrII	15075595	A	ND	NA	intergenic
chrII	12200204	A	ND	NA	intergenic
chrII	454925	A	W10D9.1	sense	intron
chrII	13875470	A	ND	NA	intergenic
chrII	454927	A	W10D9.1	sense	intron
chrII	995600	A	ND	NA	intergenic
chrII	434450	A	C24H12.12	antisense	intron
chrII	4126997	A	rhgf-2	sense	intron
chrII	454934	A	W10D9.1	sense	intron
chrII	995607	A	ND	NA	intergenic
chrII	12200025	A	ND	NA	intergenic
chrII	995611	A	ND	NA	intergenic
chrII	434462	A	C24H12.12	antisense	intron
chrII	11985184	A	ash-2	sense	intron
chrII	12282145	A	ife-5	sense	intron
chrII	7088875	A	ND	NA	intergenic
chrII	996059	A	ND	NA	intergenic
chrII	434469	A	C24H12.12	antisense	intron
chrII	995622	A	ND	NA	intergenic
chrII	4352297	A	H20J04.9	sense	intron
chrII	432426	A	C24H12.3	sense	intron
chrII	3750187	A	fbxb-91	antisense	intron
chrII	434478	A	C24H12.12	antisense	intron
chrII	437981	A	C24H12.2	sense	intron
chrII	12282160	A	ife-5	sense	intron
chrII	432433	A	C24H12.3	sense	intron
chrII	995638	A	ND	NA	intergenic
chrII	13156745	A	hpr-17	antisense	coding
chrII	15216842	A	spsb-1	sense	intron
chrII	14065977	A	lem-2	sense	3utr
chrII	995643	A	ND	NA	intergenic
chrII	434497	A	C24H12.12	antisense	intron
chrII	434498	A	C24H12.12	antisense	intron
chrII	4126091	A	rhgf-2	sense	intron
chrII	10832196	A	mix-1	sense	intron
chrII	432453	A	C24H12.3	sense	3utr
chrII	995654	A	ND	NA	intergenic
chrII	3522887	A	col-72	antisense	intron
chrII	3903819	A	F53C3.3	sense	intron
chrII	12282188	A	ife-5	sense	intron
chrII	4125879	A	rhgf-2	sense	intron
chrII	995599	A	ND	NA	intergenic
chrII	5622097	A	C17G10.9	antisense	intron
chrII	14277292	A	Y54G11A.3	sense	intron
chrII	13338963	A	Y48C3A.10	sense	intron
chrII	960853	A	C32B5.7	sense	intron
chrII	4126938	A	rhgf-2	sense	intron
chrII	3350873	A	bath-29	sense	intron
chrII	995674	A	ND	NA	intergenic
chrII	432475	A	C24H12.3	sense	3utr
chrII	432476	A	C24H12.3	sense	3utr
chrII	432477	A	C24H12.3	sense	3utr
chrII	434527	A	C24H12.12	antisense	intron
chrII	14066016	A	lem-2	sense	3utr
chrII	12200289	A	ND	NA	intergenic
chrII	256356	A	ND	NA	intergenic
chrII	3903845	A	F53C3.3	sense	intron
chrII	1864038	A	ND	NA	intergenic
chrII	9607529	A	T15H9.6	antisense	3utr
chrII	995690	A	ND	NA	intergenic
chrII	434540	A	C24H12.12	antisense	intron
chrII	6355315	A	C32D5.11	antisense	coding
chrII	11912254	A	ZK930.1	antisense	intron
chrII	13475903	A	ND	NA	intergenic
chrII	995703	A	ND	NA	intergenic
chrII	1061241	A	ND	NA	intergenic
chrII	3493129	A	ND	NA	intergenic
chrII	995709	A	ND	NA	intergenic
chrII	1864062	A	ND	NA	intergenic
chrII	4327807	A	pfd-2	sense	intron
chrII	995712	A	ND	NA	intergenic
chrII	4127107	A	rhgf-2	sense	intron
chrII	995734	A	ND	NA	intergenic
chrII	14066054	A	lem-2	sense	3utr
chrII	432519	A	C24H12.3	sense	3utr
chrII	995720	A	ND	NA	intergenic
chrII	5319272	A	ND	NA	intergenic
chrII	14277109	A	Y54G11A.3	sense	intron
chrII	1864076	A	ND	NA	intergenic
chrII	4126786	A	rhgf-2	sense	intron
chrII	1864078	A	ND	NA	intergenic
chrII	14989711	A	Y53F4B.43	sense	intron
chrII	995728	A	ND	NA	intergenic
chrII	1864081	A	ND	NA	intergenic
chrII	2140563	A	ND	NA	intergenic
chrII	2140564	A	ND	NA	intergenic
chrII	432534	A	C24H12.3	sense	3utr
chrII	13476247	A	ND	NA	intergenic
chrII	5566191	A	C17C3.2	sense	coding
chrII	13502880	A	F45H10.5	sense	intron
chrII	995745	A	ND	NA	intergenic
chrII	6318498	A	C32D5.3	antisense	coding
chrII	432549	A	C24H12.3	sense	3utr
chrII	1864005	A	ND	NA	intergenic
chrII	960935	A	C32B5.7	sense	intron
chrII	995753	A	ND	NA	intergenic
chrII	13541447	A	ND	NA	intergenic
chrII	1864109	A	ND	NA	intergenic
chrII	1864110	A	ND	NA	intergenic
chrII	5622082	A	C17G10.9	antisense	intron
chrII	13475912	A	ND	NA	intergenic
chrII	4126600	A	rhgf-2	sense	intron
chrII	995763	A	ND	NA	intergenic
chrII	3903924	A	F53C3.3	sense	intron
chrII	995766	A	ND	NA	intergenic
chrII	13476221	A	ND	NA	intergenic
chrII	1864120	A	ND	NA	intergenic
chrII	432569	A	C24H12.3	sense	3utr
chrII	1864125	A	ND	NA	intergenic
chrII	13476189	A	ND	NA	intergenic
chrII	4126453	A	rhgf-2	sense	intron
chrII	432577	A	C24H12.3	sense	3utr
chrII	432578	A	C24H12.3	sense	3utr
chrII	960963	A	C32B5.7	sense	intron
chrII	5712324	A	C18A3.4	sense	3utr
chrII	12674991	A	Y38E10A.22	antisense	intron
chrII	13476295	A	ND	NA	intergenic
chrII	7088587	A	ND	NA	intergenic
chrII	7088590	A	ND	NA	intergenic
chrII	13875664	A	ND	NA	intergenic
chrII	995795	A	ND	NA	intergenic
chrII	995797	A	ND	NA	intergenic
chrII	1622486	A	fbxa-159	antisense	intron
chrII	13476312	A	ND	NA	intergenic
chrII	14277370	A	Y54G11A.3	sense	intron
chrII	1815008	A	ND	NA	intergenic
chrII	3374472	A	ND	NA	intergenic
chrII	1815011	A	ND	NA	intergenic
chrII	13476262	A	ND	NA	intergenic
chrII	1815014	A	ND	NA	intergenic
chrII	995815	A	ND	NA	intergenic
chrII	995816	A	ND	NA	intergenic
chrII	2140649	A	ND	NA	intergenic
chrII	995819	A	ND	NA	intergenic
chrII	2494958	A	F53G2.1	sense	intron
chrII	2139927	A	ND	NA	intergenic
chrII	7088625	A	ND	NA	intergenic
chrII	5568595	A	ND	NA	intergenic
chrII	995829	A	ND	NA	intergenic
chrII	995830	A	ND	NA	intergenic
chrII	15217065	A	spsb-1	sense	intron
chrII	995832	A	ND	NA	intergenic
chrII	14277114	A	Y54G11A.3	sense	intron
chrII	1827324	A	math-41	sense	intron
chrII	3750398	A	fbxb-91	antisense	intron
chrII	14277121	A	Y54G11A.3	sense	intron
chrII	13476355	A	ND	NA	intergenic
chrII	434692	A	C24H12.12	antisense	intron
chrII	14277126	A	Y54G11A.3	sense	intron
chrII	5622279	A	C17G10.9	antisense	intron
chrII	5630472	A	ND	NA	intergenic
chrII	1813002	A	ND	NA	intergenic
chrII	4339799	A	ND	NA	intergenic
chrII	13502988	A	F45H10.5	sense	intron
chrII	995853	A	ND	NA	intergenic
chrII	2892876	A	sqv-2	antisense	intron
chrII	2140689	A	ND	NA	intergenic
chrII	995858	A	ND	NA	intergenic
chrII	2140691	A	ND	NA	intergenic
chrII	1813012	A	ND	NA	intergenic
chrII	3750422	A	fbxb-91	antisense	intron
chrII	432663	A	C24H12.3	sense	3utr
chrII	3351064	A	bath-29	sense	intron
chrII	434713	A	C24H12.12	antisense	intron
chrII	13476378	A	ND	NA	intergenic
chrII	7088669	A	ND	NA	intergenic
chrII	432670	A	C24H12.3	sense	3utr
chrII	1827359	A	math-41	sense	intron
chrII	434720	A	C24H12.12	antisense	intron
chrII	995873	A	ND	NA	intergenic
chrII	995874	A	ND	NA	intergenic
chrII	15217414	A	spsb-1	sense	intron
chrII	7088679	A	ND	NA	intergenic
chrII	2776156	A	ND	NA	intergenic
chrII	432682	A	C24H12.3	sense	3utr
chrII	14277165	A	Y54G11A.3	sense	intron
chrII	995888	A	ND	NA	intergenic
chrII	434739	A	C24H12.12	antisense	intron
chrII	7088975	A	ND	NA	intergenic
chrII	14066441	A	ND	NA	intergenic
chrII	434744	A	C24H12.12	antisense	intron
chrII	318009	A	K01A2.12	antisense	intron
chrII	434748	A	C24H12.12	antisense	intron
chrII	434749	A	C24H12.12	antisense	intron
chrII	1827391	A	math-41	sense	intron
chrII	362592	A	ptr-3	antisense	3utr
chrII	432707	A	C24H12.3	sense	3utr
chrII	15231172	A	spsb-2	sense	intron
chrII	995911	A	ND	NA	intergenic
chrII	1573451	A	ND	NA	intergenic
chrII	995917	A	ND	NA	intergenic
chrII	432719	A	C24H12.3	sense	3utr
chrII	5630544	A	ND	NA	intergenic
chrII	14277201	A	Y54G11A.3	sense	intron
chrII	5630549	A	ND	NA	intergenic
chrII	5319254	A	ND	NA	intergenic
chrII	14066105	A	ND	NA	intergenic
chrII	15120984	A	arp-1	sense	intron
chrII	4126820	A	rhgf-2	sense	intron
chrII	13875802	A	ND	NA	intergenic
chrII	13476222	A	ND	NA	intergenic
chrII	13875805	A	ND	NA	intergenic
chrII	995934	A	ND	NA	intergenic
chrII	5568613	A	ND	NA	intergenic
chrII	7573073	A	ND	NA	intergenic
chrII	4126139	A	rhgf-2	sense	intron
chrII	13738596	A	ND	NA	intergenic
chrII	995943	A	ND	NA	intergenic
chrII	995944	A	ND	NA	intergenic
chrII	7088745	A	ND	NA	intergenic
chrII	7088746	A	ND	NA	intergenic
chrII	5319277	A	ND	NA	intergenic
chrII	995950	A	ND	NA	intergenic
chrII	995952	A	ND	NA	intergenic
chrII	1827441	A	math-41	sense	intron
chrII	434802	A	C24H12.12	antisense	intron
chrII	5565807	A	ND	NA	intergenic
chrII	13875646	A	ND	NA	intergenic
chrII	12281957	A	ife-5	sense	intron
chrII	995959	A	ND	NA	intergenic
chrII	13503096	A	F45H10.5	sense	intron
chrII	5566080	A	C17C3.2	sense	coding
chrII	434812	A	C24H12.12	antisense	intron
chrII	15121246	A	arp-1	sense	intron
chrII	434814	A	C24H12.12	antisense	intron
chrII	434815	A	C24H12.12	antisense	intron
chrII	434816	A	C24H12.12	antisense	intron
chrII	432769	A	ND	NA	intergenic
chrII	7903875	A	rev-1	sense	intron
chrII	995973	A	ND	NA	intergenic
chrII	15217286	A	spsb-1	sense	intron
chrII	1813127	A	ND	NA	intergenic
chrII	14066312	A	ND	NA	intergenic
chrII	434825	A	C24H12.12	antisense	intron
chrII	995979	A	ND	NA	intergenic
chrII	9923551	A	C05C10.2	sense	intron
chrII	8535258	A	ND	NA	intergenic
chrII	13032078	A	ND	NA	intergenic
chrII	4339821	A	ND	NA	intergenic
chrII	995984	A	ND	NA	intergenic
chrII	3750546	A	fbxb-91	antisense	intron
chrII	1813140	A	ND	NA	intergenic
chrII	12801569	A	Y46G5A.18	antisense	intron
chrII	14066327	A	ND	NA	intergenic
chrII	434843	A	C24H12.12	antisense	intron
chrII	1813150	A	ND	NA	intergenic
chrII	3210877	A	ZC239.6	sense	3utr
chrII	434848	A	C24H12.12	antisense	intron
chrII	13476297	A	ND	NA	intergenic
chrII	7088803	A	ND	NA	intergenic
chrII	996004	A	ND	NA	intergenic
chrII	432805	A	ND	NA	intergenic
chrII	4339825	A	ND	NA	intergenic
chrII	14066053	A	lem-2	sense	3utr
chrII	7088924	A	ND	NA	intergenic
chrII	7574186	A	ND	NA	intergenic
chrII	434859	A	C24H12.12	antisense	intron
chrII	7088812	A	ND	NA	intergenic
chrII	434864	A	C24H12.12	antisense	intron
chrII	14277297	A	Y54G11A.3	sense	intron
chrII	432818	A	ND	NA	intergenic
chrII	3211193	A	ZC239.6	sense	3utr
chrII	3904182	A	F53C3.3	sense	intron
chrII	434871	A	C24H12.12	antisense	intron
chrII	996024	A	ND	NA	intergenic
chrII	15217264	A	spsb-1	sense	intron
chrII	1815227	A	ND	NA	intergenic
chrII	14277308	A	Y54G11A.3	sense	intron
chrII	4339829	A	ND	NA	intergenic
chrII	2775745	A	ND	NA	intergenic
chrII	170376	A	etr-1	sense	intron
chrII	996036	A	ND	NA	intergenic
chrII	996037	A	ND	NA	intergenic
chrII	1061574	A	ND	NA	intergenic
chrII	996039	A	ND	NA	intergenic
chrII	1815241	A	ND	NA	intergenic
chrII	1815242	A	ND	NA	intergenic
chrII	1815244	A	ND	NA	intergenic
chrII	4451021	A	twk-2	antisense	coding
chrII	2224846	A	F54A3.5	antisense	intron
chrII	883407	A	ND	NA	intergenic
chrII	15121104	A	arp-1	sense	intron
chrII	13475960	A	ND	NA	intergenic
chrII	8535161	A	ND	NA	intergenic
chrII	883416	A	ND	NA	intergenic
chrII	7372580	A	F43E2.7	antisense	3utr
chrII	432859	A	ND	NA	intergenic
chrII	2140685	A	ND	NA	intergenic
chrII	2224861	A	F54A3.5	antisense	intron
chrII	1061598	A	ND	NA	intergenic
chrII	14066469	A	ND	NA	intergenic
chrII	1827552	A	math-41	sense	intron
chrII	14277072	A	Y54G11A.3	sense	intron
chrII	14277346	A	Y54G11A.3	sense	intron
chrII	14277347	A	Y54G11A.3	sense	intron
chrII	13503204	A	F45H10.5	sense	intron
chrII	14277351	A	Y54G11A.3	sense	intron
chrII	2775784	A	ND	NA	intergenic
chrII	7088874	A	ND	NA	intergenic
chrII	5567211	A	ND	NA	intergenic
chrII	434301	A	C24H12.12	antisense	intron
chrII	996082	A	ND	NA	intergenic
chrII	14064828	A	lem-2	sense	intron
chrII	883446	A	ND	NA	intergenic
chrII	2139945	A	ND	NA	intergenic
chrII	14066424	A	ND	NA	intergenic
chrII	1827577	A	math-41	sense	intron
chrII	14066426	A	ND	NA	intergenic
chrII	453371	A	ND	NA	intergenic
chrII	7088897	A	ND	NA	intergenic
chrII	1815339	A	ND	NA	intergenic
chrII	14066134	A	ND	NA	intergenic
chrII	7088902	A	ND	NA	intergenic
chrII	996105	A	ND	NA	intergenic
chrII	1864458	A	ND	NA	intergenic
chrII	13875402	A	ND	NA	intergenic
chrII	14277389	A	Y54G11A.3	sense	intron
chrII	7088910	A	ND	NA	intergenic
chrII	453392	A	ND	NA	intergenic
chrII	4126864	A	rhgf-2	sense	intron
chrII	14066450	A	ND	NA	intergenic
chrII	14277396	A	Y54G11A.3	sense	intron
chrII	5630741	A	ND	NA	intergenic
chrII	11961113	A	W03C9.1	antisense	intron
chrII	1864474	A	ND	NA	intergenic
chrII	7088923	A	ND	NA	intergenic
chrII	1864476	A	ND	NA	intergenic
chrII	1815325	A	ND	NA	intergenic
chrII	7088926	A	ND	NA	intergenic
chrII	453407	A	ND	NA	intergenic
chrII	995751	A	ND	NA	intergenic
chrII	14737375	A	Y54E2A.1	antisense	coding
chrII	961323	A	C32B5.7	sense	intron
chrII	7088943	A	ND	NA	intergenic
chrII	961334	A	C32B5.7	sense	intron
chrII	14066490	A	ND	NA	intergenic
chrII	996155	A	ND	NA	intergenic
chrII	3904318	A	F53C3.3	sense	intron
chrII	996161	A	ND	NA	intergenic
chrII	435010	A	C24H12.12	antisense	intron
chrII	3904324	A	F53C3.3	sense	intron
chrII	1827638	A	math-41	sense	intron
chrII	7088969	A	ND	NA	intergenic
chrII	15121113	A	arp-1	sense	intron
chrII	435019	A	C24H12.12	antisense	intron
chrII	996173	A	ND	NA	intergenic
chrII	435023	A	C24H12.12	antisense	intron
chrII	7088976	A	ND	NA	intergenic
chrII	435025	A	C24H12.12	antisense	intron
chrII	12053330	A	Y17G7B.10	sense	intron
chrII	435031	A	C24H12.12	antisense	intron
chrII	3904346	A	F53C3.3	sense	intron
chrII	316251	A	K01A2.9	antisense	intron
chrII	14277468	A	Y54G11A.3	sense	intron
chrII	1864541	A	ND	NA	intergenic
chrII	1864542	A	ND	NA	intergenic
chrII	13727205	A	bub-3	sense	intron
chrII	7088992	A	ND	NA	intergenic
chrII	1864545	A	ND	NA	intergenic
chrII	453474	A	ND	NA	intergenic
chrII	961339	A	C32B5.7	sense	intron
chrII	435045	A	C24H12.12	antisense	intron
chrII	1827687	A	math-41	sense	intron
chrII	453481	A	ND	NA	intergenic
chrII	1864556	A	ND	NA	intergenic
chrII	996205	A	ND	NA	intergenic
chrII	435055	A	C24H12.12	antisense	intron
chrII	1827696	A	math-41	sense	intron
chrII	3904369	A	F53C3.3	sense	intron
chrII	13897071	A	mcd-1	sense	intron
chrII	7088624	A	ND	NA	intergenic
chrII	1864566	A	ND	NA	intergenic
chrII	99192	A	ND	NA	intergenic
chrII	99193	A	ND	NA	intergenic
chrII	1827706	A	math-41	sense	intron
chrII	1864572	A	ND	NA	intergenic
chrII	963455	A	C32B5.7	sense	intron
chrII	1864576	A	ND	NA	intergenic
chrII	15105856	A	Y53F4B.21	sense	intron
chrII	1827715	A	math-41	sense	intron
chrII	1864580	A	ND	NA	intergenic
chrII	1864581	A	ND	NA	intergenic
chrII	12802954	A	Y46G5A.18	antisense	coding
chrII	435087	A	C24H12.12	antisense	intron
chrII	14277058	A	Y54G11A.3	sense	intron
chrII	1827732	A	math-41	sense	intron
chrII	1827735	A	math-41	sense	intron
chrII	15217560	A	spsb-1	sense	intron
chrII	1827737	A	math-41	sense	intron
chrII	963482	A	C32B5.7	sense	intron
chrII	1864603	A	ND	NA	intergenic
chrII	15216972	A	spsb-1	sense	intron
chrII	6891674	A	C44B7.12	antisense	3utr
chrII	6794975	A	T13C2.2	sense	intron
chrII	2399135	A	ND	NA	intergenic
chrII	2140656	A	ND	NA	intergenic
chrII	12055245	A	Y17G7B.10	sense	intron
chrII	1864613	A	ND	NA	intergenic
chrII	453543	A	ND	NA	intergenic
chrII	9923506	A	C05C10.2	sense	intron
chrII	7089069	A	ND	NA	intergenic
chrII	1280942	A	srz-63	sense	coding
chrII	13875455	A	ND	NA	intergenic
chrII	564150	A	ND	NA	intergenic
chrII	11529321	A	mdt-8	antisense	intron
chrII	453562	A	ND	NA	intergenic
chrII	454815	A	W10D9.1	sense	intron
chrII	7013311	A	C52E12.4	antisense	coding
chrII	1827777	A	math-41	sense	intron
chrII	1827778	A	math-41	sense	intron
chrII	13198838	A	lec-1	sense	intron
chrII	14064801	A	lem-2	sense	intron
chrII	1827786	A	math-41	sense	intron
chrII	14064802	A	lem-2	sense	intron
chrII	1827661	A	math-41	sense	intron
chrII	1067986	A	ND	NA	intergenic
chrII	1067987	A	ND	NA	intergenic
chrII	12281973	A	ife-5	sense	intron
chrII	1827800	A	math-41	sense	intron
chrII	453455	A	ND	NA	intergenic
chrII	1827805	A	math-41	sense	intron
chrII	435167	A	C24H12.12	antisense	coding
chrII	435168	A	C24H12.12	antisense	coding
chrII	13407056	A	efl-2	sense	intron
chrII	1864529	A	ND	NA	intergenic
chrII	15121384	A	arp-1	sense	intron
chrII	13476348	A	ND	NA	intergenic
chrII	3903892	A	F53C3.3	sense	intron
chrII	62443	A	C23H3.2	sense	intron
chrII	14277458	A	Y54G11A.3	sense	intron
chrII	12187133	A	Y57A10A.14	sense	intron
chrII	11095025	A	C09H10.10	antisense	3utr
chrII	13476240	A	ND	NA	intergenic
chrII	4125686	A	rhgf-2	sense	intron
chrII	435193	A	C24H12.12	antisense	coding
chrII	14065151	A	lem-2	sense	intron
chrII	4125694	A	rhgf-2	sense	intron
chrII	4125695	A	rhgf-2	sense	intron
chrII	5567488	A	ND	NA	intergenic
chrII	4062211	A	ND	NA	intergenic
chrII	1827844	A	math-41	sense	intron
chrII	9270444	A	C01G6.3	sense	intron
chrII	14163799	A	xrn-2	sense	intron
chrII	4062220	A	ND	NA	intergenic
chrII	3548174	A	ND	NA	intergenic
chrII	14066704	A	ND	NA	intergenic
chrII	99345	A	ND	NA	intergenic
chrII	1827862	A	math-41	sense	intron
chrII	4125719	A	rhgf-2	sense	intron
chrII	99352	A	ND	NA	intergenic
chrII	1827869	A	math-41	sense	intron
chrII	1828357	A	math-41	sense	intron
chrII	12872737	A	gsy-1	antisense	intron
chrII	5630471	A	ND	NA	intergenic
chrII	7088989	A	ND	NA	intergenic
chrII	12872753	A	gsy-1	antisense	intron
chrII	2892850	A	sqv-2	antisense	intron
chrII	11848375	A	clh-1	antisense	coding
chrII	7088990	A	ND	NA	intergenic
chrII	13452343	A	pqn-27	antisense	intron
chrII	99386	A	ND	NA	intergenic
chrII	13452348	A	pqn-27	antisense	intron
chrII	1827901	A	math-41	sense	intron
chrII	1827902	A	math-41	sense	intron
chrII	13452352	A	pqn-27	antisense	intron
chrII	13452353	A	pqn-27	antisense	intron
chrII	13452354	A	pqn-27	antisense	intron
chrII	2892870	A	sqv-2	antisense	intron
chrII	14277337	A	Y54G11A.3	sense	intron
chrII	1827915	A	math-41	sense	intron
chrII	2776140	A	ND	NA	intergenic
chrII	11912269	A	ZK930.1	antisense	intron
chrII	1561101	A	fbxb-50	sense	intron
chrII	1827920	A	math-41	sense	intron
chrII	1828024	A	math-41	sense	intron
chrII	5358676	A	bmy-1	sense	5utr
chrII	2776151	A	ND	NA	intergenic
chrII	12200012	A	ND	NA	intergenic
chrII	257116	A	ND	NA	intergenic
chrII	14066533	A	ND	NA	intergenic
chrII	7088656	A	ND	NA	intergenic
chrII	2776163	A	ND	NA	intergenic
chrII	13452385	A	pqn-27	antisense	intron
chrII	2776165	A	ND	NA	intergenic
chrII	4125798	A	rhgf-2	sense	intron
chrII	13476369	A	ND	NA	intergenic
chrII	13452392	A	pqn-27	antisense	intron
chrII	13452394	A	pqn-27	antisense	intron
chrII	13452395	A	pqn-27	antisense	intron
chrII	15075568	A	ND	NA	intergenic
chrII	4125806	A	rhgf-2	sense	intron
chrII	14066000	A	lem-2	sense	3utr
chrII	2776178	A	ND	NA	intergenic
chrII	1815670	A	ND	NA	intergenic
chrII	1827689	A	math-41	sense	intron
chrII	3492984	A	ND	NA	intergenic
chrII	3750420	A	fbxb-91	antisense	intron
chrII	14064764	A	lem-2	sense	intron
chrII	1815677	A	ND	NA	intergenic
chrII	13161598	A	moe-3	antisense	intron
chrII	4126229	A	rhgf-2	sense	intron
chrII	3492992	A	ND	NA	intergenic
chrII	13875682	A	ND	NA	intergenic
chrII	8535176	A	ND	NA	intergenic
chrII	14064777	A	lem-2	sense	intron
chrII	1813015	A	ND	NA	intergenic
chrII	4125836	A	rhgf-2	sense	intron
chrII	1827693	A	math-41	sense	intron
chrII	13726796	A	bub-3	sense	intron
chrII	4125842	A	rhgf-2	sense	intron
chrII	15121124	A	arp-1	sense	intron
chrII	3493017	A	ND	NA	intergenic
chrII	99183	A	ND	NA	intergenic
chrII	1828023	A	math-41	sense	intron
chrII	9800862	A	cyp-13A6	antisense	coding
chrII	3493023	A	ND	NA	intergenic
chrII	14064800	A	lem-2	sense	intron
chrII	431265	A	C24H12.3	sense	intron
chrII	226466	A	Y43H11AL.1	antisense	intron
chrII	4125866	A	rhgf-2	sense	intron
chrII	226475	A	Y43H11AL.1	antisense	intron
chrII	4125868	A	rhgf-2	sense	intron
chrII	1828015	A	math-41	sense	intron
chrII	1828016	A	math-41	sense	intron
chrII	11529393	A	mdt-8	antisense	intron
chrII	4125877	A	rhgf-2	sense	intron
chrII	4125878	A	rhgf-2	sense	intron
chrII	226487	A	Y43H11AL.1	antisense	intron
chrII	226488	A	Y43H11AL.1	antisense	intron
chrII	226492	A	Y43H11AL.1	antisense	intron
chrII	1828029	A	math-41	sense	intron
chrII	4125886	A	rhgf-2	sense	intron
chrII	14066549	A	ND	NA	intergenic
chrII	995872	A	ND	NA	intergenic
chrII	1828036	A	math-41	sense	intron
chrII	3211126	A	ZC239.6	sense	3utr
chrII	3493063	A	ND	NA	intergenic
chrII	99528	A	ND	NA	intergenic
chrII	432060	A	C24H12.3	sense	intron
chrII	433698	A	C24H12.12	antisense	coding
chrII	12952781	A	Y38F1A.1	antisense	coding
chrII	99540	A	ND	NA	intergenic
chrII	4125911	A	rhgf-2	sense	intron
chrII	99545	A	ND	NA	intergenic
chrII	3349722	A	F14D2.8	antisense	5utr
chrII	7024847	A	C52E12.6	sense	3utr
chrII	13726942	A	bub-3	sense	intron
chrII	4459744	A	T12C9.7	antisense	intron
chrII	2430181	A	ND	NA	intergenic
chrII	3493095	A	ND	NA	intergenic
chrII	99568	A	ND	NA	intergenic
chrII	3493105	A	ND	NA	intergenic
chrII	3493106	A	ND	NA	intergenic
chrII	13726964	A	bub-3	sense	intron
chrII	2892329	A	sqv-2	antisense	intron
chrII	7089400	A	ND	NA	intergenic
chrII	7089007	A	ND	NA	intergenic
chrII	5625727	A	ND	NA	intergenic
chrII	7089405	A	ND	NA	intergenic
chrII	994559	A	ND	NA	intergenic
chrII	8535544	A	ND	NA	intergenic
chrII	14066005	A	lem-2	sense	3utr
chrII	5567752	A	ND	NA	intergenic
chrII	994860	A	ND	NA	intergenic
chrII	12281098	A	ife-5	sense	intron
chrII	13475800	A	ND	NA	intergenic
chrII	8860546	A	ND	NA	intergenic
chrII	3493137	A	ND	NA	intergenic
chrII	3493139	A	ND	NA	intergenic
chrII	4327806	A	pfd-2	sense	intron
chrII	995545	A	ND	NA	intergenic
chrII	454874	A	W10D9.1	sense	intron
chrII	99615	A	ND	NA	intergenic
chrII	2132930	A	ND	NA	intergenic
chrII	99621	A	ND	NA	intergenic
chrII	4125991	A	rhgf-2	sense	intron
chrII	7572776	A	ND	NA	intergenic
chrII	3493161	A	ND	NA	intergenic
chrII	5568391	A	ND	NA	intergenic
chrII	1828141	A	math-41	sense	intron
chrII	1828142	A	math-41	sense	intron
chrII	1828143	A	math-41	sense	intron
chrII	1828144	A	math-41	sense	intron
chrII	4126002	A	rhgf-2	sense	intron
chrII	13727027	A	bub-3	sense	intron
chrII	4126010	A	rhgf-2	sense	intron
chrII	1828155	A	math-41	sense	intron
chrII	7347526	A	nhr-21	sense	intron
chrII	99656	A	ND	NA	intergenic
chrII	99657	A	ND	NA	intergenic
chrII	1828170	A	math-41	sense	intron
chrII	1717579	A	ND	NA	intergenic
chrII	3374413	A	ND	NA	intergenic
chrII	4126699	A	rhgf-2	sense	intron
chrII	1697104	A	ND	NA	intergenic
chrII	434745	A	C24H12.12	antisense	intron
chrII	1828186	A	math-41	sense	intron
chrII	1827727	A	math-41	sense	intron
chrII	4126266	A	rhgf-2	sense	intron
chrII	1828190	A	math-41	sense	intron
chrII	13151461	A	F32A11.3	antisense	3utr
chrII	963937	A	C32B5.7	sense	coding
chrII	12281186	A	ife-5	sense	intron
chrII	12281191	A	ife-5	sense	intron
chrII	1828412	A	math-41	sense	intron
chrII	13726951	A	bub-3	sense	intron
chrII	995901	A	ND	NA	intergenic
chrII	1828208	A	math-41	sense	intron
chrII	433523	A	ND	NA	intergenic
chrII	433527	A	ND	NA	intergenic
chrII	4126825	A	rhgf-2	sense	intron
chrII	14260571	A	Y54G11A.1	antisense	intron
chrII	433532	A	ND	NA	intergenic
chrII	7574203	A	ND	NA	intergenic
chrII	994691	A	ND	NA	intergenic
chrII	15120996	A	arp-1	sense	intron
chrII	3492989	A	ND	NA	intergenic
chrII	3320385	A	F39E9.22	sense	3utr
chrII	433544	A	ND	NA	intergenic
chrII	3902857	A	ND	NA	intergenic
chrII	316811	A	K01A2.9	antisense	intron
chrII	4126092	A	rhgf-2	sense	intron
chrII	994705	A	ND	NA	intergenic
chrII	2794051	A	ND	NA	intergenic
chrII	994710	A	ND	NA	intergenic
chrII	1813911	A	ND	NA	intergenic
chrII	1828248	A	math-41	sense	intron
chrII	6167964	A	hst-3.1	antisense	intron
chrII	1827738	A	math-41	sense	intron
chrII	3098789	A	srg-24	antisense	intron
chrII	994722	A	ND	NA	intergenic
chrII	1828262	A	math-41	sense	intron
chrII	4127043	A	rhgf-2	sense	intron
chrII	3320391	A	F39E9.22	sense	3utr
chrII	1813932	A	ND	NA	intergenic
chrII	15046061	A	asc-1	sense	intron
chrII	431534	A	C24H12.3	sense	intron
chrII	995229	A	ND	NA	intergenic
chrII	4126129	A	rhgf-2	sense	intron
chrII	3750467	A	fbxb-91	antisense	intron
chrII	1828279	A	math-41	sense	intron
chrII	4126136	A	rhgf-2	sense	intron
chrII	4126137	A	rhgf-2	sense	intron
chrII	13476187	A	ND	NA	intergenic
chrII	438001	A	C24H12.2	sense	intron
chrII	15075573	A	ND	NA	intergenic
chrII	13475778	A	ND	NA	intergenic
chrII	13875787	A	ND	NA	intergenic
chrII	3493111	A	ND	NA	intergenic
chrII	95692	A	ND	NA	intergenic
chrII	7093713	A	ND	NA	intergenic
chrII	1828308	A	math-41	sense	intron
chrII	7573753	A	ND	NA	intergenic
chrII	12040470	A	ND	NA	intergenic
chrII	9938394	A	C05C10.7	antisense	intron
chrII	13727195	A	bub-3	sense	intron
chrII	1828316	A	math-41	sense	intron
chrII	1828317	A	math-41	sense	intron
chrII	1828319	A	math-41	sense	intron
chrII	433632	A	ND	NA	intergenic
chrII	433633	A	ND	NA	intergenic
chrII	994786	A	ND	NA	intergenic
chrII	1222115	A	F53A10.2	sense	intron
chrII	5778917	A	ND	NA	intergenic
chrII	5778918	A	ND	NA	intergenic
chrII	994791	A	ND	NA	intergenic
chrII	1828329	A	math-41	sense	intron
chrII	8535536	A	ND	NA	intergenic
chrII	1827898	A	math-41	sense	intron
chrII	443894	A	C24H12.1	sense	intron
chrII	12281131	A	ife-5	sense	intron
chrII	5778936	A	ND	NA	intergenic
chrII	1828346	A	math-41	sense	intron
chrII	1828347	A	math-41	sense	intron
chrII	3374590	A	ND	NA	intergenic
chrII	13418845	A	Y48E1C.1	sense	intron
chrII	433667	A	C24H12.12	antisense	coding
chrII	1222149	A	F53A10.2	sense	intron
chrII	1828358	A	math-41	sense	intron
chrII	4126977	A	rhgf-2	sense	intron
chrII	15217565	A	spsb-1	sense	intron
chrII	14066491	A	ND	NA	intergenic
chrII	3493463	A	ND	NA	intergenic
chrII	5568012	A	C17C3.13	antisense	coding
chrII	432386	A	C24H12.3	sense	intron
chrII	12200045	A	ND	NA	intergenic
chrII	6168278	A	hst-3.1	antisense	coding
chrII	1828369	A	math-41	sense	intron
chrII	15216738	A	spsb-1	sense	intron
chrII	12040451	A	ND	NA	intergenic
chrII	4126228	A	rhgf-2	sense	intron
chrII	3210773	A	ZC239.6	sense	3utr
chrII	2430544	A	ND	NA	intergenic
chrII	12238363	A	ND	NA	intergenic
chrII	13878812	A	ing-3	sense	intron
chrII	12281093	A	ife-5	sense	intron
chrII	12674992	A	Y38E10A.22	antisense	intron
chrII	431650	A	C24H12.3	sense	intron
chrII	14277211	A	Y54G11A.3	sense	intron
chrII	3493412	A	ND	NA	intergenic
chrII	14065926	A	lem-2	sense	3utr
chrII	13878822	A	ing-3	sense	intron
chrII	431657	A	C24H12.3	sense	intron
chrII	994859	A	ND	NA	intergenic
chrII	433708	A	C24H12.12	antisense	coding
chrII	433709	A	C24H12.12	antisense	coding
chrII	3493422	A	ND	NA	intergenic
chrII	14277213	A	Y54G11A.3	sense	intron
chrII	431671	A	C24H12.3	sense	intron
chrII	3493433	A	ND	NA	intergenic
chrII	431674	A	C24H12.3	sense	intron
chrII	5630559	A	ND	NA	intergenic
chrII	964156	A	C32B5.7	sense	3utr
chrII	4126269	A	rhgf-2	sense	intron
chrII	13878846	A	ing-3	sense	intron
chrII	1828415	A	math-41	sense	intron
chrII	12801600	A	Y46G5A.18	antisense	intron
chrII	14151233	A	Y48B6A.1	antisense	3utr
chrII	433740	A	C24H12.12	antisense	coding
chrII	1828430	A	math-41	sense	intron
chrII	994895	A	ND	NA	intergenic
chrII	995256	A	ND	NA	intergenic
chrII	7450173	A	ND	NA	intergenic
chrII	6854233	A	dnj-5	antisense	intron
chrII	994906	A	ND	NA	intergenic
chrII	432399	A	C24H12.3	sense	intron
chrII	431708	A	C24H12.3	sense	3utr
chrII	431709	A	C24H12.3	sense	3utr
chrII	431711	A	C24H12.3	sense	3utr
chrII	1828450	A	math-41	sense	intron
chrII	1827771	A	math-41	sense	intron
chrII	433768	A	C24H12.12	antisense	coding
chrII	1056700	A	ND	NA	intergenic
chrII	7753322	A	trx-1	antisense	coding
chrII	1814124	A	ND	NA	intergenic
chrII	1814125	A	ND	NA	intergenic
chrII	1814126	A	ND	NA	intergenic
chrII	433775	A	C24H12.12	antisense	coding
chrII	995262	A	ND	NA	intergenic
chrII	7425901	A	kcc-3	antisense	3utr
chrII	1828457	A	math-41	sense	intron
chrII	8947320	A	cutl-15	antisense	intron
chrII	433789	A	C24H12.12	antisense	coding
chrII	12281471	A	ife-5	sense	intron
chrII	994944	A	ND	NA	intergenic
chrII	5566083	A	C17C3.2	sense	coding
chrII	433796	A	C24H12.12	antisense	coding
chrII	4126998	A	rhgf-2	sense	intron
chrII	5566090	A	C17C3.2	sense	coding
chrII	3321483	A	Y46D2A.5	antisense	coding
chrII	3210861	A	ZC239.6	sense	3utr
chrII	14277220	A	Y54G11A.3	sense	intron
chrII	13738611	A	ND	NA	intergenic
chrII	5566100	A	C17C3.2	sense	coding
chrII	57966	A	C23H3.3	sense	intron
chrII	994967	A	ND	NA	intergenic
chrII	13875548	A	ND	NA	intergenic
chrII	3210905	A	ZC239.6	sense	3utr
chrII	11769498	A	F44E5.2	sense	intron
chrII	433819	A	C24H12.12	antisense	coding
chrII	8535607	A	ND	NA	intergenic
chrII	3211205	A	ZC239.6	sense	3utr
chrII	3210913	A	ZC239.6	sense	3utr
chrII	13208764	A	btf-1	sense	intron
chrII	4339313	A	ND	NA	intergenic
chrII	11769512	A	F44E5.2	sense	intron
chrII	11769513	A	F44E5.2	sense	intron
chrII	7894700	A	ptc-1	sense	intron
chrII	433837	A	C24H12.12	antisense	coding
chrII	10387120	A	ztf-27	sense	intron
chrII	433842	A	C24H12.12	antisense	coding
chrII	12187315	A	Y57A10A.14	sense	intron
chrII	12282181	A	ife-5	sense	intron
chrII	11552437	A	ND	NA	intergenic
chrII	13475785	A	ND	NA	intergenic
chrII	13727019	A	bub-3	sense	intron
chrII	3008186	A	ND	NA	intergenic
chrII	4125983	A	rhgf-2	sense	intron
chrII	12281533	A	ife-5	sense	intron
chrII	10507969	A	F59B10.2	antisense	coding
chrII	1828549	A	math-41	sense	intron
chrII	1828550	A	math-41	sense	intron
chrII	14277463	A	Y54G11A.3	sense	intron
chrII	8068727	A	T05H10.7	antisense	coding
chrII	11985186	A	ash-2	sense	intron
chrII	5568206	A	C17C3.13	antisense	coding
chrII	11985187	A	ash-2	sense	intron
chrII	13475790	A	ND	NA	intergenic
chrII	1828566	A	math-41	sense	intron
chrII	4241111	A	C16A11.2	sense	intron
chrII	14064793	A	lem-2	sense	intron
chrII	13875536	A	ND	NA	intergenic
chrII	431837	A	C24H12.3	sense	3utr
chrII	431838	A	C24H12.3	sense	3utr
chrII	1828575	A	math-41	sense	intron
chrII	7573218	A	ND	NA	intergenic
chrII	3210979	A	ZC239.6	sense	3utr
chrII	15122335	A	arp-1	sense	intron
chrII	14277291	A	Y54G11A.3	sense	intron
chrII	433898	A	C24H12.12	antisense	coding
chrII	3210987	A	ZC239.6	sense	3utr
chrII	14869458	A	R05H10.5	sense	3utr
chrII	995055	A	ND	NA	intergenic
chrII	995056	A	ND	NA	intergenic
chrII	431857	A	C24H12.3	sense	3utr
chrII	12809971	A	Y46G5A.19	sense	intron
chrII	1827454	A	math-41	sense	intron
chrII	12794514	A	cpt-1	antisense	intron
chrII	7572777	A	ND	NA	intergenic
chrII	8860581	A	ND	NA	intergenic
chrII	1828604	A	math-41	sense	intron
chrII	1828609	A	math-41	sense	intron
chrII	1828610	A	math-41	sense	intron
chrII	7573251	A	ND	NA	intergenic
chrII	1813053	A	ND	NA	intergenic
chrII	433925	A	C24H12.12	antisense	coding
chrII	13885781	A	hda-6	sense	intron
chrII	587530	A	ND	NA	intergenic
chrII	14066295	A	ND	NA	intergenic
chrII	433933	A	C24H12.12	antisense	coding
chrII	14066307	A	ND	NA	intergenic
chrII	12810004	A	Y46G5A.19	sense	intron
chrII	9897749	A	unc-4	antisense	3utr
chrII	2139926	A	ND	NA	intergenic
chrII	438039	A	C24H12.2	sense	intron
chrII	7089074	A	ND	NA	intergenic
chrII	13897034	A	mcd-1	sense	intron
chrII	431901	A	C24H12.3	sense	3utr
chrII	3374879	A	ND	NA	intergenic
chrII	587552	A	ND	NA	intergenic
chrII	3493168	A	ND	NA	intergenic
chrII	1828642	A	math-41	sense	intron
chrII	1828643	A	math-41	sense	intron
chrII	2139940	A	ND	NA	intergenic
chrII	1828649	A	math-41	sense	intron
chrII	1828650	A	math-41	sense	intron
chrII	12281138	A	ife-5	sense	intron
chrII	4241202	A	C16A11.2	sense	intron
chrII	8525621	A	ND	NA	intergenic
chrII	3567414	A	ND	NA	intergenic
chrII	12756793	A	Y46G5A.8	sense	intron
chrII	1828667	A	math-41	sense	intron
chrII	12582716	A	ceh-100	antisense	intron
chrII	3374910	A	ND	NA	intergenic
chrII	587583	A	ND	NA	intergenic
chrII	1828672	A	math-41	sense	intron
chrII	9393987	A	ND	NA	intergenic
chrII	11769668	A	F44E5.2	sense	intron
chrII	11769669	A	F44E5.2	sense	intron
chrII	9393991	A	ND	NA	intergenic
chrII	14066055	A	lem-2	sense	3utr
chrII	9393995	A	ND	NA	intergenic
chrII	1828688	A	math-41	sense	intron
chrII	4339538	A	ND	NA	intergenic
chrII	14171988	A	ND	NA	intergenic
chrII	4851541	A	ND	NA	intergenic
chrII	9394006	A	ND	NA	intergenic
chrII	995159	A	ND	NA	intergenic
chrII	3125080	A	ND	NA	intergenic
chrII	995162	A	ND	NA	intergenic
chrII	11769692	A	F44E5.2	sense	intron
chrII	14163808	A	xrn-2	sense	intron
chrII	5625700	A	ND	NA	intergenic
chrII	4126785	A	rhgf-2	sense	intron
chrII	11769705	A	F44E5.2	sense	intron
chrII	2760554	A	fbxb-107	sense	intron
chrII	4126573	A	rhgf-2	sense	intron
chrII	2140014	A	ND	NA	intergenic
chrII	995185	A	ND	NA	intergenic
chrII	3211125	A	ZC239.6	sense	3utr
chrII	1718134	A	ND	NA	intergenic
chrII	11769720	A	F44E5.2	sense	intron
chrII	12269753	A	Y57A10A.27	antisense	3utr
chrII	7753595	A	ND	NA	intergenic
chrII	5625724	A	ND	NA	intergenic
chrII	995197	A	ND	NA	intergenic
chrII	433813	A	C24H12.12	antisense	coding
chrII	3211243	A	ZC239.6	sense	3utr
chrII	3493766	A	ND	NA	intergenic
chrII	995207	A	ND	NA	intergenic
chrII	1828744	A	math-41	sense	intron
chrII	4126604	A	rhgf-2	sense	intron
chrII	995213	A	ND	NA	intergenic
chrII	995214	A	ND	NA	intergenic
chrII	5390224	A	EEED8.16	antisense	3utr
chrII	1828755	A	math-41	sense	intron
chrII	432024	A	C24H12.3	sense	intron
chrII	4126618	A	rhgf-2	sense	intron
chrII	3211163	A	ZC239.6	sense	3utr
chrII	434077	A	C24H12.12	antisense	intron
chrII	995653	A	ND	NA	intergenic
chrII	434080	A	C24H12.12	antisense	intron
chrII	448418	A	ND	NA	intergenic
chrII	11769499	A	F44E5.2	sense	intron
chrII	432037	A	C24H12.3	sense	intron
chrII	13475751	A	ND	NA	intergenic
chrII	15121423	A	arp-1	sense	intron
chrII	11319210	A	T24F1.5	antisense	3utr
chrII	434093	A	C24H12.12	antisense	intron
chrII	7089001	A	ND	NA	intergenic
chrII	7573424	A	ND	NA	intergenic
chrII	3211185	A	ZC239.6	sense	3utr
chrII	1073074	A	K02E7.4	sense	intron
chrII	1073075	A	K02E7.4	sense	intron
chrII	432052	A	C24H12.3	sense	intron
chrII	1827486	A	math-41	sense	intron
chrII	4126025	A	rhgf-2	sense	intron
chrII	1073080	A	K02E7.4	sense	intron
chrII	434105	A	C24H12.12	antisense	intron
chrII	1056698	A	ND	NA	intergenic
chrII	1056699	A	ND	NA	intergenic
chrII	434108	A	C24H12.12	antisense	intron
chrII	5622087	A	C17G10.9	antisense	intron
chrII	432062	A	C24H12.3	sense	intron
chrII	1073089	A	K02E7.4	sense	intron
chrII	1073090	A	K02E7.4	sense	intron
chrII	15216971	A	spsb-1	sense	intron
chrII	15216966	A	spsb-1	sense	intron
chrII	11768586	A	F44E5.2	sense	intron
chrII	432077	A	C24H12.3	sense	intron
chrII	432078	A	C24H12.3	sense	intron
chrII	4126675	A	rhgf-2	sense	intron
chrII	15122388	A	arp-1	sense	intron
chrII	432085	A	C24H12.3	sense	intron
chrII	4232902	A	C16A11.10	sense	intron
chrII	4695841	A	F10G7.5	sense	intron
chrII	434138	A	C24H12.12	antisense	intron
chrII	12806526	A	Y46G5A.19	sense	intron
chrII	882652	A	ND	NA	intergenic
chrII	4126685	A	rhgf-2	sense	intron
chrII	1056735	A	ND	NA	intergenic
chrII	15122400	A	arp-1	sense	intron
chrII	12463440	A	F15A4.2	sense	intron
chrII	4126694	A	rhgf-2	sense	intron
chrII	14065966	A	lem-2	sense	3utr
chrII	4126698	A	rhgf-2	sense	intron
chrII	14991760	A	Y53F4B.43	sense	intron
chrII	882672	A	ND	NA	intergenic
chrII	13475826	A	ND	NA	intergenic
chrII	13475827	A	ND	NA	intergenic
chrII	13475828	A	ND	NA	intergenic
chrII	13475829	A	ND	NA	intergenic
chrII	434167	A	C24H12.12	antisense	intron
chrII	13475835	A	ND	NA	intergenic
chrII	13475836	A	ND	NA	intergenic
chrII	1864021	A	ND	NA	intergenic
chrX	17407488	A	crb-1	antisense	coding
chrX	13276167	A	K09A11.5	antisense	coding
chrX	15246156	A	piki-1	antisense	intron
chrX	316425	A	ND	NA	intergenic
chrX	13336587	A	F46G10.4	sense	3utr
chrX	15769612	A	Y7A5A.1	antisense	intron
chrX	16903694	A	F39F10.4	antisense	intron
chrX	11444141	A	ND	NA	intergenic
chrX	7021591	A	cah-5	sense	intron
chrX	7733274	A	ND	NA	intergenic
chrX	8073647	A	ND	NA	intergenic
chrX	11441693	A	ND	NA	intergenic
chrX	316446	A	ND	NA	intergenic
chrX	316447	A	ND	NA	intergenic
chrX	15945245	A	mec-5	sense	intron
chrX	16903714	A	F39F10.4	antisense	intron
chrX	6204451	A	bca-1	antisense	coding
chrX	15006757	A	C18B12.6	antisense	coding
chrX	9908264	A	ND	NA	intergenic
chrX	5635625	A	T22B7.8	sense	intron
chrX	6843826	A	ND	NA	intergenic
chrX	13336622	A	F46G10.4	sense	3utr
chrX	1167920	A	T13G4.3	sense	intron
chrX	316465	A	ND	NA	intergenic
chrX	8073651	A	ND	NA	intergenic
chrX	297013	A	ND	NA	intergenic
chrX	11441417	A	ND	NA	intergenic
chrX	16223804	A	ND	NA	intergenic
chrX	11441318	A	ND	NA	intergenic
chrX	1255497	A	npr-11	antisense	intron
chrX	10821815	A	frm-9	antisense	coding
chrX	15817399	A	ND	NA	intergenic
chrX	9908304	A	ND	NA	intergenic
chrX	7021654	A	cah-5	sense	intron
chrX	960600	A	ncs-1	antisense	3utr
chrX	14163033	A	R03E1.2	antisense	3utr
chrX	466011	A	aagr-4	sense	intron
chrX	16223838	A	ND	NA	intergenic
chrX	888418	A	ND	NA	intergenic
chrX	16903781	A	F39F10.4	antisense	intron
chrX	57446	A	Y73B3A.18	sense	intron
chrX	57447	A	Y73B3A.18	sense	intron
chrX	10416748	A	ZC504.3	antisense	3utr
chrX	2030703	A	Y102A11A.2	sense	intron
chrX	12004976	A	sma-5	antisense	5utr
chrX	2030722	A	Y102A11A.2	sense	intron
chrX	2030723	A	Y102A11A.2	sense	intron
chrX	16903672	A	F39F10.4	antisense	intron
chrX	11208329	A	C34F6.5	antisense	coding
chrX	54922	A	Y73B3A.18	sense	intron
chrX	54923	A	Y73B3A.18	sense	intron
chrX	9908674	A	ND	NA	intergenic
chrX	54926	A	Y73B3A.18	sense	intron
chrX	2123408	A	F53B1.8	antisense	3utr
chrX	1805457	A	ND	NA	intergenic
chrX	9908675	A	ND	NA	intergenic
chrX	13994123	A	C31E10.5	antisense	intron
chrX	11444118	A	ND	NA	intergenic
chrX	7021594	A	cah-5	sense	intron
chrX	6383264	A	igcm-2	antisense	intron
chrX	1805475	A	ND	NA	intergenic
chrX	8293540	A	F13B9.1	sense	intron
chrX	9908390	A	ND	NA	intergenic
chrX	6732975	A	R03E9.2	antisense	intron
chrX	14297777	A	ND	NA	intergenic
chrX	1805493	A	ND	NA	intergenic
chrX	3790006	A	F35A5.4	antisense	coding
chrX	16054972	A	ND	NA	intergenic
chrX	11442368	A	ND	NA	intergenic
chrX	16223943	A	ND	NA	intergenic
chrX	57547	A	Y73B3A.18	sense	intron
chrX	16223952	A	ND	NA	intergenic
chrX	8293587	A	F13B9.1	sense	intron
chrX	57557	A	Y73B3A.18	sense	intron
chrX	9833687	A	F47A4.5	antisense	3utr
chrX	13336280	A	F46G10.4	sense	3utr
chrX	57562	A	Y73B3A.18	sense	intron
chrX	9996975	A	grk-1	antisense	intron
chrX	15769637	A	Y7A5A.1	antisense	intron
chrX	2486501	A	K02E10.4	sense	intron
chrX	15429862	A	R03A10.1	antisense	3utr
chrX	13691345	A	adm-2	sense	intron
chrX	8293609	A	F13B9.1	sense	intron
chrX	11443948	A	ND	NA	intergenic
chrX	11442642	A	ND	NA	intergenic
chrX	920303	A	F35H12.4	antisense	3utr
chrX	13336306	A	F46G10.4	sense	3utr
chrX	13336307	A	F46G10.4	sense	3utr
chrX	16510886	A	ND	NA	intergenic
chrX	11443967	A	ND	NA	intergenic
chrX	17049857	A	gcy-11	antisense	intron
chrX	7988999	A	sdpn-1	antisense	3utr
chrX	8179465	A	C17H11.1	sense	intron
chrX	11441418	A	ND	NA	intergenic
chrX	13336279	A	F46G10.4	sense	3utr
chrX	8293132	A	F13B9.1	sense	intron
chrX	14176527	A	C37E2.2	sense	intron
chrX	8293658	A	F13B9.1	sense	intron
chrX	16510757	A	ND	NA	intergenic
chrX	17623848	A	H18N23.2	antisense	intron
chrX	15952093	A	ND	NA	intergenic
chrX	12295984	A	ND	NA	intergenic
chrX	13336370	A	F46G10.4	sense	3utr
chrX	9908019	A	ND	NA	intergenic
chrX	9908020	A	ND	NA	intergenic
chrX	13410614	A	ND	NA	intergenic
chrX	14757688	A	C05G5.5	antisense	intron
chrX	16903391	A	F39F10.4	antisense	intron
chrX	11441468	A	ND	NA	intergenic
chrX	13994122	A	C31E10.5	antisense	intron
chrX	16223797	A	ND	NA	intergenic
chrX	13336384	A	F46G10.4	sense	3utr
chrX	13410626	A	ND	NA	intergenic
chrX	6944580	A	inx-1	antisense	3utr
chrX	17036616	A	F35B3.7	antisense	coding
chrX	10315660	A	F41E7.9	antisense	intron
chrX	8293708	A	F13B9.1	sense	intron
chrX	16350541	A	ND	NA	intergenic
chrX	14305615	A	C11H1.2	antisense	coding
chrX	16350520	A	ND	NA	intergenic
chrX	8293714	A	F13B9.1	sense	intron
chrX	16350548	A	ND	NA	intergenic
chrX	11441493	A	ND	NA	intergenic
chrX	14176825	A	C37E2.2	sense	intron
chrX	4858204	A	add-1	antisense	coding
chrX	3970277	A	C16B8.t3	sense	3utr
chrX	5370720	A	jkk-1	sense	intron
chrX	2175120	A	F48B9.8	antisense	intron
chrX	13691366	A	adm-2	sense	intron
chrX	3374442	A	clc-3	antisense	coding
chrX	13691367	A	adm-2	sense	intron
chrX	9822573	A	ND	NA	intergenic
chrX	2543368	A	ND	NA	intergenic
chrX	14176626	A	C37E2.2	sense	intron
chrX	14176627	A	C37E2.2	sense	intron
chrX	16034164	A	mboa-1	sense	intron
chrX	57207	A	Y73B3A.18	sense	intron
chrX	10203512	A	sex-1	antisense	intron
chrX	16034169	A	mboa-1	sense	intron
chrX	16350528	A	ND	NA	intergenic
chrX	8293765	A	F13B9.1	sense	intron
chrX	11763080	A	lact-7	sense	intron
chrX	16223980	A	ND	NA	intergenic
chrX	57228	A	Y73B3A.18	sense	intron
chrX	16053058	A	T27A8.1	sense	intron
chrX	2487182	A	K02E10.4	sense	intron
chrX	15546605	A	olrn-1	sense	3utr
chrX	7768465	A	deg-1	sense	intron
chrX	1759123	A	ND	NA	intergenic
chrX	11444117	A	ND	NA	intergenic
chrX	7021974	A	cah-5	sense	intron
chrX	12811673	A	gei-3	antisense	coding
chrX	9908633	A	ND	NA	intergenic
chrX	9908634	A	ND	NA	intergenic
chrX	11441068	A	ND	NA	intergenic
chrX	8073629	A	ND	NA	intergenic
chrX	8073631	A	ND	NA	intergenic
chrX	8073632	A	ND	NA	intergenic
chrX	57249	A	Y73B3A.18	sense	intron
chrX	6843813	A	ND	NA	intergenic
chrX	6843814	A	ND	NA	intergenic
chrX	57255	A	Y73B3A.18	sense	intron
chrX	11444124	A	ND	NA	intergenic
chrX	9908140	A	ND	NA	intergenic
chrX	57260	A	Y73B3A.18	sense	intron
chrX	58797	A	Y73B3A.18	sense	intron
chrX	11444142	A	ND	NA	intergenic
chrX	2114717	A	F53B1.6	antisense	3utr
chrX	58800	A	Y73B3A.18	sense	intron
chrX	57266	A	Y73B3A.18	sense	intron
chrX	6843827	A	ND	NA	intergenic
chrX	2400692	A	C43H6.7	antisense	coding
chrX	11581365	A	frm-3	sense	3utr
chrX	5538231	A	lgx-1	antisense	coding
chrX	8073658	A	ND	NA	intergenic
chrX	8073659	A	ND	NA	intergenic
chrX	13374909	A	C49F8.2	antisense	coding
chrX	14176795	A	C37E2.2	sense	intron
chrX	753090	A	aex-3	antisense	intron
chrX	8073667	A	ND	NA	intergenic
chrX	13691336	A	adm-2	sense	intron
chrX	8073673	A	ND	NA	intergenic
chrX	11444172	A	ND	NA	intergenic
chrX	7022029	A	cah-5	sense	intron
chrX	1011665	A	rncs-1	sense	3utr
chrX	6407122	A	ND	NA	intergenic
chrX	11442643	A	ND	NA	intergenic
chrX	57300	A	Y73B3A.18	sense	intron
chrX	8862678	A	ND	NA	intergenic
chrX	13991386	A	ND	NA	intergenic
chrX	13691356	A	adm-2	sense	intron
chrX	14297775	A	ND	NA	intergenic
chrX	16063457	A	ND	NA	intergenic
chrX	58851	A	Y73B3A.18	sense	coding
chrX	58852	A	Y73B3A.18	sense	coding
chrX	1011685	A	rncs-1	sense	3utr
chrX	2257894	A	crn-4	antisense	coding
chrX	1011687	A	rncs-1	sense	3utr
chrX	13336553	A	F46G10.4	sense	3utr
chrX	1911274	A	ND	NA	intergenic
chrX	14998951	A	cutl-3	antisense	5utr
chrX	16866057	A	aakg-2	antisense	3utr
chrX	316397	A	ND	NA	intergenic
chrX	3199471	A	ND	NA	intergenic
chrX	316406	A	ND	NA	intergenic
chrX	316407	A	ND	NA	intergenic
chrX	316408	A	ND	NA	intergenic
chrX	15945211	A	mec-5	sense	intron
chrX	14177621	A	C37E2.2	sense	intron
chrIII	1568769	A	Y67D2.2	sense	intron
chrIII	11151363	A	Y47D3A.29	sense	intron
chrIII	11151364	A	Y47D3A.29	sense	intron
chrIII	9551877	A	unc-16	sense	intron
chrIII	1568775	A	Y67D2.2	sense	intron
chrIII	1568776	A	Y67D2.2	sense	intron
chrIII	12623191	A	ND	NA	intergenic
chrIII	13203468	A	gly-5	sense	intron
chrIII	4315149	A	dcn-1	sense	intron
chrIII	12466194	A	ND	NA	intergenic
chrIII	12743104	A	ssl-1	sense	intron
chrIII	12466199	A	ND	NA	intergenic
chrIII	200733	A	F40G9.17	sense	intron
chrIII	13522608	A	pod-1	antisense	intron
[truncated: 7,678 more rows]

## Sheet: L4 non-repetitive sites
Chromosome name	Position in chromosome	Nucleotide changed	Gene name in region	Orientation of the gene	Position in gene
chrV	4214789	A	ND	NA	intergenic
chrV	14204935	A	ND	NA	intergenic
chrV	2695182	A	Y45G12B.2	sense	intron
chrV	18038445	A	Y59A8B.6	sense	intron
chrV	16619549	A	Y70C5A.3	antisense	intron
chrV	6795302	A	ND	NA	intergenic
chrV	19646515	A	Y43F8C.9	sense	intron
chrV	18038452	A	Y59A8B.6	sense	intron
chrV	3642378	A	F59B1.8	antisense	coding
chrV	2685280	A	kel-8	sense	intron
chrV	12931142	A	T16G1.2	sense	intron
chrV	19919201	A	Y60A3A.19	sense	intron
chrV	12009546	A	add-2	antisense	3utr
chrV	6421371	A	T05H4.10	antisense	intron
chrV	45133	A	ND	NA	intergenic
chrV	686168	A	ND	NA	intergenic
chrV	686169	A	ND	NA	intergenic
chrV	45147	A	ND	NA	intergenic
chrV	686174	A	ND	NA	intergenic
chrV	1316960	A	F16B3.3	antisense	intron
chrV	10958946	A	vps-36	antisense	3utr
chrV	6795365	A	ND	NA	intergenic
chrV	9074790	A	T27E4.7	antisense	3utr
chrV	15655016	A	F53E4.1	antisense	intron
chrV	14202988	A	ND	NA	intergenic
chrV	12218477	A	vab-8	sense	intron
chrV	686191	A	ND	NA	intergenic
chrV	686192	A	ND	NA	intergenic
chrV	686193	A	ND	NA	intergenic
chrV	15186035	A	Y75B12B.3	antisense	coding
chrV	12136570	A	C27A7.1	sense	intron
chrV	18028667	A	Y59A8B.6	sense	intron
chrV	3217534	A	apx-1	sense	intron
chrV	3217539	A	apx-1	sense	intron
chrV	3217544	A	apx-1	sense	intron
chrV	18784620	A	Y17D7B.10	sense	intron
chrV	20251174	A	mdt-17	antisense	intron
chrV	13271181	A	ND	NA	intergenic
chrV	4128910	A	T05B4.4	sense	intron
chrV	18880657	A	emb-4	antisense	intron
chrV	686226	A	ND	NA	intergenic
chrV	3895443	A	sre-9	sense	intron
chrV	3969174	A	cyp-34A9	antisense	coding
chrV	20251673	A	mdt-17	antisense	intron
chrV	18996711	A	Y39B6A.36	sense	intron
chrV	11466908	A	aat-6	antisense	3utr
chrV	19845277	A	Y116F11B.6	antisense	intron
chrV	6418594	A	T05H4.10	antisense	intron
chrV	13271205	A	ND	NA	intergenic
chrV	13271209	A	ND	NA	intergenic
chrV	5044394	A	K11D12.9	antisense	intron
chrV	991403	A	unc-34	sense	intron
chrV	2554029	A	Y45G12C.11	antisense	coding
chrV	6418607	A	T05H4.10	antisense	intron
chrV	6574256	A	fut-2	antisense	intron
chrV	991411	A	unc-34	sense	intron
chrV	15531721	A	F21A3.2	antisense	intron
chrV	3895480	A	sre-9	sense	intron
chrV	686395	A	ND	NA	intergenic
chrV	299194	A	F33E11.2	sense	intron
chrV	10406078	A	F15H10.7	antisense	intron
chrV	299199	A	F33E11.2	sense	intron
chrV	6418626	A	T05H4.10	antisense	intron
chrV	6418627	A	T05H4.10	antisense	intron
chrV	9707354	A	xbx-6	sense	intron
chrV	991431	A	unc-34	sense	intron
chrV	1616072	A	nhr-179	antisense	intron
chrV	6418634	A	T05H4.10	antisense	intron
chrV	991438	A	unc-34	sense	intron
chrV	14827728	A	W06A7.4	sense	intron
chrV	686291	A	ND	NA	intergenic
chrV	686292	A	ND	NA	intergenic
chrV	9490649	A	K06A4.7	antisense	intron
chrV	19099148	A	Y39B6A.16	antisense	coding
chrV	5273824	A	ND	NA	intergenic
chrV	14160102	A	T02B5.3	antisense	intron
chrV	7508201	A	str-31	antisense	coding
chrV	1931498	A	ND	NA	intergenic
chrV	6418673	A	T05H4.10	antisense	intron
chrV	18996248	A	Y39B6A.36	sense	intron
chrV	686325	A	ND	NA	intergenic
chrV	5050614	A	pqn-51	sense	intron
chrV	4198648	A	H43I07.3	sense	intron
chrV	18784506	A	Y17D7B.10	sense	intron
chrV	686331	A	ND	NA	intergenic
chrV	686334	A	ND	NA	intergenic
chrV	686335	A	ND	NA	intergenic
chrV	2490752	A	C01B4.8	sense	intron
chrV	1931526	A	ND	NA	intergenic
chrV	686344	A	ND	NA	intergenic
chrV	18417368	A	ND	NA	intergenic
chrV	10792323	A	D1054.10	antisense	intron
chrV	18417369	A	ND	NA	intergenic
chrV	18864408	A	emb-4	antisense	intron
chrV	9355545	A	ttr-49	antisense	3utr
chrV	14541082	A	C53A5.5	sense	intron
chrV	18784539	A	Y17D7B.10	sense	intron
chrV	20429084	A	fce-2	sense	intron
chrV	19917086	A	Y60A3A.19	sense	intron
chrV	19917087	A	Y60A3A.19	sense	intron
chrV	19908901	A	chk-2	antisense	3utr
chrV	9228584	A	F07C3.3	antisense	intron
chrV	18417467	A	ND	NA	intergenic
chrV	15471325	A	dpf-1	sense	5utr
chrV	686387	A	ND	NA	intergenic
chrV	6421106	A	T05H4.10	antisense	intron
chrV	20779319	A	ND	NA	intergenic
chrV	686394	A	ND	NA	intergenic
chrV	2697531	A	Y45G12B.2	sense	intron
chrV	20429194	A	fce-2	sense	intron
chrV	2685251	A	kel-8	sense	intron
chrV	18562785	A	srg-34	antisense	coding
chrV	1470792	A	tag-304	sense	intron
chrV	14315849	A	F47B8.2	antisense	3utr
chrV	14315852	A	F47B8.2	antisense	3utr
chrV	5598264	A	ND	NA	intergenic
chrV	2009426	A	F59A7.8	sense	intron
chrV	1470805	A	tag-304	sense	intron
chrV	2685270	A	kel-8	sense	intron
chrV	2685272	A	kel-8	sense	intron
chrV	686427	A	ND	NA	intergenic
chrV	4782432	A	ND	NA	intergenic
chrV	4782433	A	ND	NA	intergenic
chrV	4782434	A	ND	NA	intergenic
chrV	19116388	A	pro-3	antisense	intron
chrV	5437798	A	F08F3.9	antisense	coding
chrV	18104684	A	par-4	sense	intron
chrV	18784621	A	Y17D7B.10	sense	intron
chrV	19116404	A	pro-3	antisense	intron
chrV	15296885	A	cpr-3	antisense	3utr
chrV	18104695	A	par-4	sense	intron
chrV	18784632	A	Y17D7B.10	sense	intron
chrV	11413881	A	deg-3	antisense	coding
chrV	20251002	A	mdt-17	antisense	intron
chrV	12808573	A	ZC443.1	antisense	coding
chrV	272767	A	Y58G8A.5	antisense	intron
chrV	991616	A	unc-34	sense	intron
chrV	2490753	A	C01B4.8	sense	intron
chrV	20429192	A	fce-2	sense	intron
chrV	20093322	A	sec-23	sense	intron
chrV	20429195	A	fce-2	sense	intron
chrV	991628	A	unc-34	sense	intron
chrV	19917197	A	Y60A3A.19	sense	intron
chrV	6574478	A	fut-2	antisense	coding
chrV	20251023	A	mdt-17	antisense	intron
chrV	20251024	A	mdt-17	antisense	intron
chrV	5795224	A	ZC250.3	antisense	intron
chrV	18784658	A	Y17D7B.10	sense	intron
chrV	686483	A	ND	NA	intergenic
chrV	12974485	A	shw-3	antisense	coding
chrV	20251033	A	mdt-17	antisense	intron
chrV	686491	A	ND	NA	intergenic
chrV	2646768	A	ND	NA	intergenic
chrV	20205638	A	fbxb-59	antisense	intron
chrV	20429224	A	fce-2	sense	intron
chrV	16544169	A	Y32B12B.2	sense	intron
chrV	991658	A	unc-34	sense	intron
chrV	9171372	A	B0222.9	antisense	intron
chrV	991661	A	unc-34	sense	intron
chrV	2445750	A	F56A4.6	antisense	coding
chrV	1642941	A	Y46H3D.1	sense	coding
chrV	16544192	A	Y32B12B.2	sense	intron
chrV	19919297	A	Y60A3A.19	sense	intron
chrV	688578	A	H25P19.1	sense	intron
chrV	4198851	A	H43I07.3	sense	intron
chrV	19917217	A	Y60A3A.19	sense	intron
chrV	20251082	A	mdt-17	antisense	intron
chrV	16557914	A	Y32B12B.4	sense	intron
chrV	5943757	A	pst-1	sense	intron
chrV	5050832	A	pqn-51	sense	intron
chrV	18104785	A	par-4	sense	intron
chrV	1931735	A	ND	NA	intergenic
chrV	2646488	A	ND	NA	intergenic
chrV	5437913	A	F08F3.9	antisense	intron
chrV	1931742	A	ND	NA	intergenic
chrV	2646498	A	ND	NA	intergenic
chrV	1931747	A	ND	NA	intergenic
chrV	5226983	A	Y49G5B.1	sense	intron
chrV	6967788	A	ptr-15	antisense	coding
chrV	9684051	A	ZK287.4	antisense	coding
chrV	20010409	A	ND	NA	intergenic
chrV	2646520	A	ND	NA	intergenic
chrV	7347967	A	nhr-147	sense	coding
chrV	18995626	A	Y39B6A.36	sense	intron
chrV	2646529	A	ND	NA	intergenic
chrV	2646530	A	ND	NA	intergenic
chrV	18995715	A	Y39B6A.36	sense	intron
chrV	2646533	A	ND	NA	intergenic
chrV	19196332	A	pph-5	sense	intron
chrV	2691595	A	Y45G12B.3	antisense	intron
chrV	20251152	A	mdt-17	antisense	intron
chrV	6421010	A	T05H4.10	antisense	intron
chrV	1931795	A	ND	NA	intergenic
chrV	2691606	A	Y45G12B.3	antisense	intron
chrV	2646552	A	ND	NA	intergenic
chrV	20251163	A	mdt-17	antisense	intron
chrV	2646556	A	ND	NA	intergenic
chrV	6421028	A	T05H4.10	antisense	intron
chrV	2646566	A	ND	NA	intergenic
chrV	2691623	A	Y45G12B.3	antisense	intron
chrV	4551211	A	ND	NA	intergenic
chrV	137772	A	W03F9.11	antisense	coding
chrV	20251184	A	mdt-17	antisense	intron
chrV	9140787	A	B0222.3	antisense	coding
chrV	16544319	A	Y32B12B.2	sense	intron
chrV	2646593	A	ND	NA	intergenic
chrV	2646595	A	ND	NA	intergenic
chrV	4616772	A	F54D11.4	sense	intron
chrV	17977926	A	snx-6	antisense	intron
chrV	2646600	A	ND	NA	intergenic
chrV	2128457	A	F22F7.1	sense	intron
chrV	8991308	A	F59E11.7	sense	intron
chrV	4551245	A	ND	NA	intergenic
chrV	2128463	A	F22F7.1	sense	intron
chrV	2646610	A	ND	NA	intergenic
chrV	686685	A	ND	NA	intergenic
chrV	299614	A	F33E11.2	sense	intron
chrV	686690	A	ND	NA	intergenic
chrV	686691	A	ND	NA	intergenic
chrV	1124964	A	W07B8.3	sense	intron
chrV	6421093	A	T05H4.10	antisense	intron
chrV	18995814	A	Y39B6A.36	sense	intron
chrV	19197431	A	pph-5	sense	intron
chrV	686696	A	ND	NA	intergenic
chrV	9658986	A	B0331.2	antisense	coding
chrV	6431339	A	gad-1	antisense	3utr
chrV	20245257	A	psa-1	antisense	intron
chrV	19114770	A	pro-3	antisense	intron
chrV	5597808	A	ND	NA	intergenic
chrV	5597809	A	ND	NA	intergenic
chrV	5479026	A	ND	NA	intergenic
chrV	8532755	A	his-8	antisense	coding
chrV	686709	A	ND	NA	intergenic
chrV	6421110	A	T05H4.10	antisense	intron
chrV	686711	A	ND	NA	intergenic
chrV	17970964	A	snx-6	antisense	intron
chrV	5597822	A	ND	NA	intergenic
chrV	5597823	A	ND	NA	intergenic
chrV	4129410	A	T05B4.4	sense	3utr
chrV	12931716	A	T16G1.2	sense	intron
chrV	686725	A	ND	NA	intergenic
chrV	2382473	A	Y19D10A.5	sense	intron
chrV	2382474	A	Y19D10A.5	sense	intron
chrV	14205719	A	ND	NA	intergenic
chrV	6421133	A	T05H4.10	antisense	intron
chrV	20251757	A	mdt-17	antisense	intron
chrV	20251805	A	mdt-17	antisense	intron
chrV	19114776	A	pro-3	antisense	intron
chrV	686738	A	ND	NA	intergenic
chrV	18995861	A	Y39B6A.36	sense	intron
chrV	6421147	A	T05H4.10	antisense	intron
chrV	18995870	A	Y39B6A.36	sense	intron
chrV	12931744	A	T16G1.2	sense	intron
chrV	12931745	A	T16G1.2	sense	intron
chrV	2646692	A	ND	NA	intergenic
chrV	14213801	A	T16A9.5	antisense	coding
chrV	18995883	A	Y39B6A.36	sense	intron
chrV	13533879	A	C56A3.3	antisense	coding
chrV	14869187	A	ZC412.4	antisense	coding
chrV	299716	A	F33E11.2	sense	intron
chrV	18289349	A	clec-247	sense	intron
chrV	2646726	A	ND	NA	intergenic
chrV	19918603	A	Y60A3A.19	sense	intron
chrV	8684737	A	cln-3.3	sense	intron
chrV	2646740	A	ND	NA	intergenic
chrV	2646741	A	ND	NA	intergenic
chrV	4551383	A	ND	NA	intergenic
chrV	9777881	A	F46B6.4	antisense	coding
chrV	2646749	A	ND	NA	intergenic
chrV	2646750	A	ND	NA	intergenic
chrV	15426275	A	Y36E3A.2	sense	intron
chrV	16546535	A	Y32B12B.2	sense	intron
chrV	19915900	A	chk-2	antisense	intron
chrV	2646762	A	ND	NA	intergenic
chrV	12955431	A	R186.6	antisense	intron
chrV	15596271	A	B0391.8	antisense	5utr
chrV	686832	A	ND	NA	intergenic
chrV	686834	A	ND	NA	intergenic
chrV	2646772	A	ND	NA	intergenic
chrV	14205685	A	ND	NA	intergenic
chrV	2646776	A	ND	NA	intergenic
chrV	16543188	A	Y32B12B.2	sense	intron
chrV	8626938	A	F41E6.12	antisense	3utr
chrV	16818941	A	T20B3.1	sense	intron
chrV	686848	A	ND	NA	intergenic
chrV	686849	A	ND	NA	intergenic
chrV	13449003	A	ND	NA	intergenic
chrV	20245255	A	psa-1	antisense	intron
chrV	5479176	A	ND	NA	intergenic
chrV	5479177	A	ND	NA	intergenic
chrV	14519489	A	C53A5.17	antisense	3utr
chrV	15139287	A	K08F9.1	antisense	coding
chrV	20245260	A	psa-1	antisense	intron
chrV	10205656	A	ZK856.10	antisense	3utr
chrV	8532754	A	his-8	antisense	coding
chrV	4339843	A	D2063.3	antisense	intron
chrV	14205716	A	ND	NA	intergenic
chrV	14205717	A	ND	NA	intergenic
chrV	4152087	A	Y45G5AM.6	antisense	intron
chrV	2646808	A	ND	NA	intergenic
chrV	20245273	A	psa-1	antisense	intron
chrV	2646812	A	ND	NA	intergenic
chrV	18996698	A	Y39B6A.36	sense	intron
chrV	2646817	A	ND	NA	intergenic
chrV	2646818	A	ND	NA	intergenic
chrV	10128166	A	aos-1	antisense	intron
chrV	19114791	A	pro-3	antisense	intron
chrV	5479210	A	ND	NA	intergenic
chrV	19114798	A	pro-3	antisense	intron
chrV	20251784	A	mdt-17	antisense	intron
chrV	2646836	A	ND	NA	intergenic
chrV	19918985	A	Y60A3A.19	sense	intron
chrV	44852	A	ND	NA	intergenic
chrV	3959612	A	cyp-34A6	antisense	coding
chrV	2698047	A	Y45G12B.2	sense	intron
chrV	4207755	A	H43I07.1	sense	intron
chrV	5479237	A	ND	NA	intergenic
chrV	4551495	A	ND	NA	intergenic
chrV	20607816	A	ttr-12	antisense	coding
chrV	13450057	A	ND	NA	intergenic
chrV	13450058	A	ND	NA	intergenic
chrV	12906119	A	ttr-29	antisense	3utr
chrV	13450064	A	ND	NA	intergenic
chrV	16546275	A	Y32B12B.2	sense	intron
chrV	2698070	A	Y45G12B.2	sense	intron
chrV	13450072	A	ND	NA	intergenic
chrV	20346503	A	Y38H6A.3	sense	intron
chrV	996189	A	ND	NA	intergenic
chrV	996190	A	ND	NA	intergenic
chrV	8248161	A	C16D9.6	antisense	3utr
chrV	16369467	A	W08G11.3	sense	intron
chrV	996197	A	ND	NA	intergenic
chrV	19688294	A	mrp-7	sense	intron
chrV	12145514	A	che-11	antisense	coding
chrV	6421355	A	T05H4.10	antisense	intron
chrV	16819054	A	T20B3.1	sense	intron
chrV	20251511	A	mdt-17	antisense	intron
chrV	20251513	A	mdt-17	antisense	intron
chrV	1289083	A	ND	NA	intergenic
chrV	6421372	A	T05H4.10	antisense	intron
chrV	20093827	A	sec-23	sense	intron
chrV	19555204	A	oac-1	antisense	coding
chrV	256907	A	nhr-204	antisense	coding
chrV	6687630	A	K11G9.5	antisense	coding
chrV	911192	A	H24K24.4	sense	intron
chrV	9110339	A	pqn-31	sense	intron
chrV	686997	A	ND	NA	intergenic
chrV	20245267	A	psa-1	antisense	intron
chrV	1289115	A	ND	NA	intergenic
chrV	687006	A	ND	NA	intergenic
chrV	6421409	A	T05H4.10	antisense	intron
chrV	911175	A	H24K24.4	sense	intron
chrV	5114799	A	C04F5.9	antisense	coding
chrV	6421425	A	T05H4.10	antisense	intron
chrV	20163506	A	F19B2.5	antisense	intron
chrV	10205683	A	ZK856.10	antisense	3utr
chrV	1758136	A	clec-204	sense	intron
chrV	17207221	A	Y68A4A.13	antisense	3utr
chrV	7869373	A	F40A3.5	antisense	coding
chrV	17157054	A	F40D4.13	antisense	coding
chrV	8496063	A	pxn-1	sense	coding
chrV	16819136	A	T20B3.1	sense	intron
chrV	961473	A	sqv-6	antisense	intron
chrV	9993154	A	ND	NA	intergenic
chrV	10907468	A	F32D8.10	antisense	coding
chrV	1100747	A	ND	NA	intergenic
chrV	10746829	A	F28H7.4	antisense	intron
chrV	351185	A	atg-9	sense	intron
chrV	351189	A	atg-9	sense	intron
chrV	12074751	A	R07B7.6	antisense	intron
chrV	10511298	A	C35A5.7	antisense	intron
chrV	20010832	A	ND	NA	intergenic
chrV	4628305	A	F54D11.2	sense	3utr
chrV	20919520	A	pbo-5	sense	intron
chrV	20245491	A	psa-1	antisense	intron
chrV	15513769	A	lgc-31	antisense	intron
chrV	13966334	A	R10D12.18	antisense	5utr
chrV	9707349	A	xbx-6	sense	intron
chrV	20251649	A	mdt-17	antisense	intron
chrV	299179	A	F33E11.2	sense	intron
chrV	992262	A	unc-34	sense	intron
chrV	2462730	A	F56A4.10	antisense	intron
chrV	19409931	A	C25F9.5	antisense	coding
chrV	14990349	A	cdt-2	antisense	coding
chrV	6425620	A	T05H4.11	antisense	intron
chrV	18686999	A	ubc-19	antisense	coding
chrV	18417492	A	ND	NA	intergenic
chrV	19197444	A	pph-5	sense	intron
chrV	18996251	A	Y39B6A.36	sense	intron
chrV	483162	A	nhr-130	antisense	coding
chrV	20251678	A	mdt-17	antisense	intron
chrV	8684576	A	cln-3.3	sense	intron
chrV	6663201	A	pmp-5	antisense	intron
chrV	18105387	A	par-4	sense	intron
chrV	18996268	A	Y39B6A.36	sense	intron
chrV	207928	A	DC2.3	sense	intron
chrV	1295419	A	egl-2	antisense	intron
chrV	15076415	A	unc-76	sense	intron
chrV	15076416	A	unc-76	sense	intron
chrV	5598275	A	ND	NA	intergenic
chrV	10224708	A	daf-36	antisense	coding
chrV	18417164	A	ND	NA	intergenic
chrV	17970701	A	snx-6	antisense	intron
chrV	5598289	A	ND	NA	intergenic
chrV	390226	A	ZK6.6	sense	intron
chrV	390227	A	ZK6.6	sense	intron
chrV	390234	A	ZK6.6	sense	intron
chrV	17941599	A	dpy-21	antisense	intron
chrV	390242	A	ZK6.6	sense	intron
chrV	10501223	A	C35A5.3	antisense	coding
chrV	4207721	A	H43I07.1	sense	intron
chrV	17970677	A	snx-6	antisense	intron
chrV	13134956	A	clec-41	antisense	3utr
chrV	390253	A	ZK6.6	sense	intron
chrV	390254	A	ZK6.6	sense	intron
chrV	390258	A	ZK6.6	sense	intron
chrV	2646547	A	ND	NA	intergenic
chrV	17941622	A	dpy-21	antisense	intron
chrV	17941623	A	dpy-21	antisense	intron
chrV	992376	A	unc-34	sense	intron
chrV	390266	A	ZK6.6	sense	intron
chrV	390267	A	ZK6.6	sense	intron
chrV	390268	A	ZK6.6	sense	intron
chrV	8684736	A	cln-3.3	sense	intron
chrV	1289346	A	ND	NA	intergenic
chrV	13539179	A	ND	NA	intergenic
chrV	14195844	A	ZC376.7	sense	intron
chrV	992391	A	unc-34	sense	intron
chrV	992392	A	unc-34	sense	intron
chrV	869515	A	T02B11.4	antisense	3utr
chrV	10500290	A	C35A5.3	antisense	intron
chrV	18417496	A	ND	NA	intergenic
chrV	8580241	A	symk-1	sense	intron
chrV	7011474	A	C33G8.2	sense	coding
chrV	13621443	A	F53F4.16	antisense	3utr
chrV	18417428	A	ND	NA	intergenic
chrV	14920855	A	W09D12.1	antisense	coding
chrV	20251800	A	mdt-17	antisense	intron
chrV	4207771	A	H43I07.1	sense	intron
chrV	8580255	A	symk-1	sense	intron
chrV	18996384	A	Y39B6A.36	sense	intron
chrV	8684706	A	cln-3.3	sense	intron
chrV	8512676	A	F45F2.9	antisense	3utr
chrV	8684710	A	cln-3.3	sense	intron
chrV	2194604	A	nhr-13	sense	intron
chrV	5948589	A	pst-1	sense	intron
chrV	18996400	A	Y39B6A.36	sense	intron
chrV	4428983	A	ND	NA	intergenic
chrV	9993401	A	ND	NA	intergenic
chrV	19246267	A	str-81	antisense	intron
chrV	18996426	A	Y39B6A.36	sense	intron
chrV	5672127	A	pqn-13	antisense	coding
chrV	4216000	A	ND	NA	intergenic
chrV	4216002	A	ND	NA	intergenic
chrV	2194627	A	nhr-13	sense	intron
chrV	18626040	A	Y69H2.15	antisense	coding
chrV	1022293	A	R09A1.2	antisense	intron
chrV	2485451	A	C01B4.9	antisense	intron
chrV	20251756	A	mdt-17	antisense	intron
chrV	12940498	A	T16G1.4	antisense	coding
chrV	12328447	A	twk-13	antisense	intron
chrV	5948639	A	pst-1	sense	intron
chrV	5948641	A	pst-1	sense	intron
chrV	5948643	A	pst-1	sense	intron
chrV	11039270	A	pak-2	antisense	coding
chrV	20919526	A	pbo-5	sense	intron
chrV	5948650	A	pst-1	sense	intron
chrV	4627697	A	F54D11.2	sense	intron
chrV	12079315	A	R07B7.9	antisense	coding
chrV	10986740	A	ND	NA	intergenic
chrV	9161973	A	ND	NA	intergenic
chrV	4627704	A	F54D11.2	sense	intron
chrV	4627709	A	F54D11.2	sense	intron
chrV	5948675	A	pst-1	sense	intron
chrV	18784129	A	Y17D7B.10	sense	intron
chrV	4551212	A	ND	NA	intergenic
chrV	6685964	A	K11G9.5	antisense	3utr
chrV	4207896	A	H43I07.1	sense	intron
chrV	4627737	A	F54D11.2	sense	intron
chrV	10095906	A	srd-49	sense	intron
chrV	15482150	A	nhr-151	antisense	5utr
chrV	4627756	A	F54D11.2	sense	intron
chrV	4627757	A	F54D11.2	sense	intron
chrV	4121905	A	phat-5	antisense	coding
chrV	18996530	A	Y39B6A.36	sense	intron
chrV	2692403	A	Y45G12B.3	antisense	intron
chrV	4627768	A	F54D11.2	sense	intron
chrV	4627770	A	F54D11.2	sense	intron
chrV	20919519	A	pbo-5	sense	intron
chrV	64830	A	daam-1	antisense	intron
chrV	1931488	A	ND	NA	intergenic
chrV	6421387	A	T05H4.10	antisense	intron
chrV	5948740	A	pst-1	sense	intron
chrV	64839	A	daam-1	antisense	intron
chrV	4781387	A	ND	NA	intergenic
chrV	5948753	A	pst-1	sense	intron
chrV	4627794	A	F54D11.2	sense	intron
chrV	15164756	A	T09F5.12	antisense	3utr
chrV	5627222	A	acy-4	antisense	coding
chrV	4207966	A	H43I07.1	sense	intron
chrV	4207967	A	H43I07.1	sense	intron
chrV	1289104	A	ND	NA	intergenic
chrV	18996578	A	Y39B6A.36	sense	intron
chrV	19506532	A	Y43F8B.3	sense	coding
chrV	992613	A	unc-34	sense	intron
chrV	5502317	A	T05C3.2	sense	intron
chrV	1375598	A	rga-4	antisense	intron
chrV	4627824	A	F54D11.2	sense	intron
chrV	9356658	A	gpa-3	antisense	3utr
chrV	10906858	A	F32D8.10	antisense	3utr
chrV	877952	A	T02B11.8	antisense	intron
chrV	1332611	A	Y75B7AL.2	antisense	coding
chrV	18996614	A	Y39B6A.36	sense	intron
chrV	13471112	A	T10G3.1	antisense	intron
chrV	4627851	A	F54D11.2	sense	intron
chrV	5948812	A	pst-1	sense	intron
chrV	12490125	A	inx-11	sense	intron
chrV	20135898	A	ND	NA	intergenic
chrV	18996625	A	Y39B6A.36	sense	intron
chrV	20898257	A	unc-80	sense	intron
chrV	10425747	A	apc-10	antisense	coding
chrV	1588628	A	F16B4.6	sense	intron
chrV	687001	A	ND	NA	intergenic
chrV	992664	A	unc-34	sense	intron
chrV	20010398	A	ND	NA	intergenic
chrV	18038176	A	Y59A8B.6	sense	intron
chrV	992673	A	unc-34	sense	intron
chrV	7052710	A	F20A1.10	antisense	3utr
chrV	4627881	A	F54D11.2	sense	intron
chrV	118186	A	cgp-1	antisense	3utr
chrV	18996654	A	Y39B6A.36	sense	intron
chrV	5135794	A	F14F9.4	sense	intron
chrV	17546142	A	C18D4.8	antisense	coding
chrV	18417233	A	ND	NA	intergenic
chrV	19917196	A	Y60A3A.19	sense	intron
chrV	18996667	A	Y39B6A.36	sense	intron
chrV	2704832	A	nuo-5	sense	intron
chrV	16819137	A	T20B3.1	sense	intron
chrV	17647373	A	fbxa-192	antisense	intron
chrV	4627911	A	F54D11.2	sense	intron
chrV	18417101	A	ND	NA	intergenic
chrV	4627924	A	F54D11.2	sense	intron
chrV	19918970	A	Y60A3A.19	sense	intron
chrV	4627930	A	F54D11.2	sense	intron
chrV	19926199	A	ND	NA	intergenic
chrV	9786849	A	ND	NA	intergenic
chrV	6987239	A	nhr-139	antisense	coding
chrV	3288553	A	F35F10.6	antisense	coding
chrV	6418623	A	T05H4.10	antisense	intron
chrV	13276657	A	uig-1	antisense	coding
chrV	4876883	A	T19H12.6	antisense	coding
chrV	6418686	A	T05H4.10	antisense	intron
chrV	18417143	A	ND	NA	intergenic
chrV	9031160	A	C25E10.5	sense	intron
chrV	18996729	A	Y39B6A.36	sense	intron
chrV	20251766	A	mdt-17	antisense	intron
chrV	18996734	A	Y39B6A.36	sense	intron
chrV	2766335	A	R05D8.9	antisense	coding
chrV	16602627	A	T03E6.8	antisense	coding
chrV	11146756	A	ND	NA	intergenic
chrV	12445193	A	C54D10.8	antisense	3utr
chrV	17970699	A	snx-6	antisense	intron
chrV	17970700	A	snx-6	antisense	intron
chrV	5948674	A	pst-1	sense	intron
chrV	17970703	A	snx-6	antisense	intron
chrV	13475345	A	T10G3.8	antisense	coding
chrV	18417172	A	ND	NA	intergenic
chrV	11636247	A	T27F2.2	antisense	intron
chrV	18417179	A	ND	NA	intergenic
chrV	19593137	A	kcnl-1	sense	intron
chrV	16543279	A	Y32B12B.2	sense	intron
chrV	18417200	A	ND	NA	intergenic
chrV	1177137	A	T21H3.1	sense	intron
chrV	17977950	A	snx-6	antisense	intron
chrV	19983930	A	ND	NA	intergenic
chrV	14444469	A	F23B12.4	sense	intron
chrV	19983938	A	ND	NA	intergenic
chrV	19983939	A	ND	NA	intergenic
chrV	19983952	A	ND	NA	intergenic
chrV	2354769	A	Y19D10A.8	antisense	intron
chrV	2195032	A	nhr-13	sense	intron
chrV	20346461	A	Y38H6A.3	sense	intron
chrV	1830495	A	ND	NA	intergenic
chrV	13330016	A	nhr-129	antisense	coding
chrV	18044859	A	ebp-1	sense	intron
chrV	20346476	A	Y38H6A.3	sense	intron
chrV	7380590	A	C03G6.17	antisense	intron
chrV	2195057	A	nhr-13	sense	intron
chrV	9023422	A	bus-1	antisense	coding
chrV	1224321	A	madd-2	antisense	intron
chrV	4628103	A	F54D11.2	sense	intron
chrV	4628109	A	F54D11.2	sense	intron
chrV	11143699	A	C06H2.7	antisense	coding
chrV	18658963	A	Y69H2.3	antisense	intron
chrV	14638746	A	ND	NA	intergenic
chrV	5479024	A	ND	NA	intergenic
chrV	4628134	A	F54D11.2	sense	intron
chrV	12931721	A	T16G1.2	sense	intron
chrV	4628141	A	F54D11.2	sense	intron
chrV	18995813	A	Y39B6A.36	sense	intron
chrV	11245233	A	mxl-1	sense	intron
chrV	14552756	A	C53A5.13	sense	intron
chrV	18996427	A	Y39B6A.36	sense	intron
chrV	5988025	A	fut-8	antisense	coding
chrV	4628163	A	F54D11.2	sense	intron
chrV	12373700	A	F23H12.10	antisense	5utr
chrV	4628169	A	F54D11.2	sense	intron
chrV	14200525	A	ND	NA	intergenic
chrV	4165328	A	Y45G5AM.3	sense	intron
chrV	4165329	A	Y45G5AM.3	sense	intron
chrV	4628178	A	F54D11.2	sense	intron
chrV	4628180	A	F54D11.2	sense	intron
chrV	4628183	A	F54D11.2	sense	intron
chrV	4628184	A	F54D11.2	sense	intron
chrV	4628185	A	F54D11.2	sense	intron
chrV	18417376	A	ND	NA	intergenic
chrV	18417377	A	ND	NA	intergenic
chrV	16610257	A	Y32B12C.5	antisense	5utr
chrV	18417175	A	ND	NA	intergenic
chrV	16557806	A	Y32B12B.4	sense	intron
chrV	17655537	A	ND	NA	intergenic
chrV	18417396	A	ND	NA	intergenic
chrV	18417397	A	ND	NA	intergenic
chrV	4628214	A	F54D11.2	sense	intron
chrV	18417399	A	ND	NA	intergenic
chrV	1877759	A	Y32G9A.8	antisense	intron
chrV	18417163	A	ND	NA	intergenic
chrV	19918596	A	Y60A3A.19	sense	intron
chrV	11075336	A	ND	NA	intergenic
chrV	4628234	A	F54D11.2	sense	intron
chrV	4628235	A	F54D11.2	sense	intron
chrV	17315597	A	F31E9.11	antisense	5utr
chrV	2377490	A	Y19D10A.12	antisense	intron
chrV	18417429	A	ND	NA	intergenic
chrV	16557846	A	Y32B12B.4	sense	intron
chrV	4628247	A	F54D11.2	sense	intron
chrV	8684501	A	cln-3.3	sense	intron
chrV	18417435	A	ND	NA	intergenic
chrV	9160476	A	col-144	antisense	intron
chrV	12761050	A	abcf-1	antisense	3utr
chrV	4628256	A	F54D11.2	sense	intron
chrV	4628258	A	F54D11.2	sense	intron
chrV	16369443	A	W08G11.3	sense	intron
chrV	11964199	A	F58H1.7	antisense	intron
chrV	18417450	A	ND	NA	intergenic
chrV	4628267	A	F54D11.2	sense	intron
chrV	5596975	A	ND	NA	intergenic
chrV	18417456	A	ND	NA	intergenic
chrV	20779315	A	ND	NA	intergenic
chrV	3895092	A	sre-9	sense	intron
chrV	4628279	A	F54D11.2	sense	intron
chrV	44859	A	ND	NA	intergenic
chrV	175934	A	Y108G3AL.2	sense	intron
chrV	3895106	A	sre-9	sense	intron
chrV	3895107	A	sre-9	sense	intron
chrV	44875	A	ND	NA	intergenic
chrV	4781394	A	ND	NA	intergenic
chrV	19918669	A	Y60A3A.19	sense	intron
chrV	4628303	A	F54D11.2	sense	3utr
chrV	18784080	A	Y17D7B.10	sense	intron
chrV	911185	A	H24K24.4	sense	intron
chrV	44884	A	ND	NA	intergenic
chrV	44885	A	ND	NA	intergenic
chrV	3962712	A	cyp-34A7	antisense	coding
chrV	911193	A	H24K24.4	sense	intron
chrV	911194	A	H24K24.4	sense	intron
chrV	20010843	A	ND	NA	intergenic
chrV	18417505	A	ND	NA	intergenic
chrV	175970	A	Y108G3AL.2	sense	intron
chrV	3293027	A	F35F10.4	sense	intron
chrV	18417510	A	ND	NA	intergenic
chrV	1290087	A	egl-2	antisense	coding
chrV	5597842	A	ND	NA	intergenic
chrV	7776110	A	ND	NA	intergenic
chrV	17553267	A	ND	NA	intergenic
chrV	911226	A	H24K24.4	sense	intron
chrV	3749761	A	ND	NA	intergenic
chrV	3749764	A	ND	NA	intergenic
chrV	11636216	A	T27F2.2	antisense	intron
chrV	3749770	A	ND	NA	intergenic
chrV	911244	A	H24K24.4	sense	intron
chrV	911246	A	H24K24.4	sense	intron
chrV	11089807	A	Y42A5A.1	sense	intron
chrV	3749781	A	ND	NA	intergenic
chrV	3749786	A	ND	NA	intergenic
chrV	18784161	A	Y17D7B.10	sense	intron
chrV	20898459	A	unc-80	sense	intron
chrV	3368868	A	C04E12.2	sense	intron
chrV	18784166	A	Y17D7B.10	sense	intron
chrV	10228040	A	fipr-4	antisense	3utr
chrV	911284	A	H24K24.4	sense	intron
chrV	13680565	A	ccz-1	sense	intron
chrV	5230518	A	C52A10.1	antisense	coding
chrV	4177851	A	Y45G5AM.2	sense	intron
chrV	911294	A	H24K24.4	sense	intron
chrV	911295	A	H24K24.4	sense	intron
chrV	4177856	A	Y45G5AM.2	sense	intron
chrV	20093840	A	sec-23	sense	intron
chrV	18044867	A	ebp-1	sense	intron
chrV	2234311	A	nhr-96	sense	intron
chrV	17655574	A	fbxa-129	antisense	5utr
chrV	13680600	A	ccz-1	sense	intron
chrV	3850202	A	btb-21	antisense	coding
chrV	15515611	A	lgc-31	antisense	intron
chrV	15010811	A	nmr-2	antisense	coding
chrV	3895269	A	sre-9	sense	intron
chrV	8216554	A	K07C11.8	antisense	coding
chrV	18497516	A	slo-1	sense	coding
chrV	3895280	A	sre-9	sense	intron
chrV	4689911	A	K03B4.1	sense	intron
chrV	15531348	A	F21A3.2	antisense	intron
chrV	11094014	A	Y42A5A.1	sense	intron
chrV	2685269	A	kel-8	sense	intron
chrII	12673025	A	ND	NA	intergenic
chrII	12238853	A	ND	NA	intergenic
chrII	12238858	A	ND	NA	intergenic
chrII	3086350	A	Y25C1A.5	sense	intron
chrII	4126740	A	rhgf-2	sense	intron
chrII	6916124	A	B0252.8	sense	5utr
chrII	13475870	A	ND	NA	intergenic
chrII	15122463	A	arp-1	sense	intron
chrII	12281890	A	ife-5	sense	intron
chrII	13476187	A	ND	NA	intergenic
chrII	13476189	A	ND	NA	intergenic
chrII	10663996	A	D2089.3	antisense	coding
chrII	7082045	A	ND	NA	intergenic
chrII	11552437	A	ND	NA	intergenic
chrII	13733647	A	ND	NA	intergenic
chrII	879286	A	ND	NA	intergenic
chrII	13541447	A	ND	NA	intergenic
chrII	13475912	A	ND	NA	intergenic
chrII	14647371	A	unc-52	antisense	3utr
chrII	12281932	A	ife-5	sense	intron
chrII	7069774	A	him-14	antisense	coding
chrII	13475922	A	ND	NA	intergenic
chrII	15216725	A	spsb-1	sense	intron
chrII	4339799	A	ND	NA	intergenic
chrII	4339801	A	ND	NA	intergenic
chrII	4126819	A	rhgf-2	sense	intron
chrII	11483236	A	twk-5	antisense	coding
chrII	4339819	A	ND	NA	intergenic
chrII	14143596	A	W03H9.2	antisense	coding
chrII	6951021	A	F22D3.6	antisense	coding
chrII	12281533	A	ife-5	sense	intron
chrII	4339824	A	ND	NA	intergenic
chrII	4339825	A	ND	NA	intergenic
chrII	4339829	A	ND	NA	intergenic
chrII	4339830	A	ND	NA	intergenic
chrII	4339831	A	ND	NA	intergenic
chrII	13475960	A	ND	NA	intergenic
chrII	3909753	A	bcmo-2	antisense	coding
chrII	8173703	A	T05C12.1	sense	intron
chrII	11912254	A	ZK930.1	antisense	intron
chrII	13339361	A	Y48C3A.10	sense	intron
chrII	13452343	A	pqn-27	antisense	intron
chrII	9783450	A	ND	NA	intergenic
chrII	15231136	A	spsb-2	sense	intron
chrII	1828208	A	math-41	sense	intron
chrII	3356835	A	bath-29	sense	intron
chrII	3213476	A	ND	NA	intergenic
chrII	3098789	A	srg-24	antisense	intron
chrII	3098791	A	srg-24	antisense	intron
chrII	5669032	A	ND	NA	intergenic
chrII	15216823	A	spsb-1	sense	intron
chrII	3213496	A	ND	NA	intergenic
chrII	13670588	A	Y48E1A.1	antisense	3utr
chrII	9345218	A	F42A8.1	antisense	coding
chrII	14277307	A	Y54G11A.3	sense	intron
chrII	3086537	A	Y25C1A.5	sense	intron
chrII	3086548	A	Y25C1A.5	sense	intron
chrII	4126938	A	rhgf-2	sense	intron
chrII	4776161	A	F26G1.6	antisense	coding
chrII	4126947	A	rhgf-2	sense	intron
chrII	4755691	A	C27D9.2	antisense	coding
chrII	15075573	A	ND	NA	intergenic
chrII	5622010	A	C17G10.9	antisense	intron
chrII	13875456	A	ND	NA	intergenic
chrII	15075595	A	ND	NA	intergenic
chrII	12040470	A	ND	NA	intergenic
chrII	10830110	A	mix-1	sense	intron
chrII	5622047	A	C17G10.9	antisense	intron
chrII	12872753	A	gsy-1	antisense	intron
chrII	12282157	A	ife-5	sense	intron
chrII	14065966	A	lem-2	sense	3utr
chrII	1828744	A	math-41	sense	intron
chrII	13502771	A	F45H10.5	sense	intron
chrII	13973812	A	Y39G8B.2	antisense	3utr
chrII	3354936	A	bath-29	sense	intron
chrII	14277684	A	Y54G11A.3	sense	intron
chrII	1835324	A	T08E11.8	antisense	coding
chrII	13261122	A	Y48C3A.1	sense	coding
chrII	4127043	A	rhgf-2	sense	intron
chrII	4127044	A	rhgf-2	sense	intron
chrII	4127047	A	rhgf-2	sense	intron
chrII	13417527	A	Y48E1C.1	sense	intron
chrII	14066000	A	lem-2	sense	3utr
chrII	5622097	A	C17G10.9	antisense	intron
chrII	13875544	A	ND	NA	intergenic
chrII	11850074	A	clh-1	antisense	coding
chrII	5626203	A	ND	NA	intergenic
chrII	13418845	A	Y48E1C.1	sense	intron
chrII	4127078	A	rhgf-2	sense	intron
chrII	5626221	A	ND	NA	intergenic
chrII	4127087	A	rhgf-2	sense	intron
chrII	4923761	A	aagr-2	antisense	coding
chrII	1828243	A	math-41	sense	intron
chrII	4127093	A	rhgf-2	sense	intron
chrII	13475903	A	ND	NA	intergenic
chrII	5626237	A	ND	NA	intergenic
chrII	4127107	A	rhgf-2	sense	intron
chrII	5626245	A	ND	NA	intergenic
chrII	8294791	A	F14F11.2	antisense	3utr
chrII	1828248	A	math-41	sense	intron
chrII	62190	A	C23H3.2	sense	intron
chrII	13476247	A	ND	NA	intergenic
chrII	8272287	A	tdc-1	sense	intron
chrII	4127137	A	rhgf-2	sense	intron
chrII	6318498	A	C32D5.3	antisense	coding
chrII	13476262	A	ND	NA	intergenic
chrII	13197736	A	lec-1	sense	intron
chrII	14066105	A	ND	NA	intergenic
chrII	14313915	A	ND	NA	intergenic
chrII	15217085	A	spsb-1	sense	intron
chrII	5177794	A	C27D6.12	antisense	coding
chrII	13476295	A	ND	NA	intergenic
chrII	11110863	A	glb-4	antisense	coding
chrII	11985365	A	ash-2	sense	intron
chrII	1622486	A	fbxa-159	antisense	intron
chrII	883451	A	ND	NA	intergenic
chrII	14277453	A	Y54G11A.3	sense	intron
chrII	2892881	A	sqv-2	antisense	intron
chrII	1827304	A	math-41	sense	intron
chrII	6591570	A	C56C10.9	antisense	coding
chrII	5319153	A	ND	NA	intergenic
chrII	1827317	A	math-41	sense	intron
chrII	15122261	A	arp-1	sense	intron
chrII	14277114	A	Y54G11A.3	sense	intron
chrII	1827324	A	math-41	sense	intron
chrII	9382405	A	ND	NA	intergenic
chrII	5630472	A	ND	NA	intergenic
chrII	15217161	A	spsb-1	sense	intron
chrII	9091602	A	C07H4.1	antisense	coding
chrII	13476378	A	ND	NA	intergenic
chrII	12941852	A	arrd-10	sense	coding
chrII	10932766	A	R03D7.2	antisense	3utr
chrII	5630509	A	ND	NA	intergenic
chrII	2263602	A	K09F6.4	antisense	coding
chrII	14277175	A	Y54G11A.3	sense	intron
chrII	14066442	A	ND	NA	intergenic
chrII	13875774	A	ND	NA	intergenic
chrII	1827391	A	math-41	sense	intron
chrII	3320389	A	F39E9.22	sense	3utr
chrII	1827398	A	math-41	sense	intron
chrII	13892168	A	mcd-1	sense	intron
chrII	14277195	A	Y54G11A.3	sense	intron
chrII	5319254	A	ND	NA	intergenic
chrII	5630559	A	ND	NA	intergenic
chrII	14277220	A	Y54G11A.3	sense	intron
chrII	1827441	A	math-41	sense	intron
chrII	14066295	A	ND	NA	intergenic
chrII	637563	A	T04B8.1	sense	coding
chrII	13896790	A	mcd-1	sense	intron
chrII	14277246	A	Y54G11A.3	sense	intron
chrII	9286275	A	tag-165	sense	intron
chrII	12810006	A	Y46G5A.19	sense	intron
chrII	14066312	A	ND	NA	intergenic
chrII	7928459	A	ZK669.7	antisense	coding
chrII	1827474	A	math-41	sense	intron
chrII	13475751	A	ND	NA	intergenic
chrII	1827480	A	math-41	sense	intron
chrII	1827481	A	math-41	sense	intron
chrII	397981	A	C03H5.6	antisense	coding
chrII	1827486	A	math-41	sense	intron
chrII	8110756	A	C41C4.3	antisense	coding
chrII	14066347	A	ND	NA	intergenic
chrII	1237683	A	lin-42	antisense	intron
chrII	15105822	A	Y53F4B.21	sense	intron
chrII	1827510	A	math-41	sense	intron
chrII	2224825	A	F54A3.5	antisense	intron
chrII	13339323	A	Y48C3A.10	sense	intron
chrII	14277308	A	Y54G11A.3	sense	intron
chrII	15229045	A	ND	NA	intergenic
chrII	13339328	A	Y48C3A.10	sense	intron
chrII	2224835	A	F54A3.5	antisense	intron
chrII	2224836	A	F54A3.5	antisense	intron
chrII	5567181	A	ND	NA	intergenic
chrII	8870608	A	T07D4.2	antisense	intron
chrII	62170	A	C23H3.2	sense	intron
chrII	11854558	A	clh-1	antisense	coding
chrII	12281637	A	ife-5	sense	intron
chrII	1827552	A	math-41	sense	intron
chrII	13153461	A	hpr-17	antisense	3utr
chrII	14277347	A	Y54G11A.3	sense	intron
chrII	14277351	A	Y54G11A.3	sense	intron
chrII	2775784	A	ND	NA	intergenic
chrII	14064764	A	lem-2	sense	intron
chrII	62187	A	C23H3.2	sense	intron
chrII	62188	A	C23H3.2	sense	intron
chrII	883438	A	ND	NA	intergenic
chrII	14277365	A	Y54G11A.3	sense	intron
chrII	9650936	A	ZK1307.4	antisense	3utr
chrII	1827577	A	math-41	sense	intron
chrII	14066426	A	ND	NA	intergenic
chrII	1827579	A	math-41	sense	intron
chrII	7426813	A	kcc-3	antisense	coding
chrII	12026623	A	Y17G7B.8	antisense	intron
chrII	62209	A	C23H3.2	sense	intron
chrII	62210	A	C23H3.2	sense	intron
chrII	62212	A	C23H3.2	sense	intron
chrII	14066134	A	ND	NA	intergenic
chrII	15217414	A	spsb-1	sense	intron
chrII	9923336	A	C05C10.2	sense	intron
chrII	9464586	A	R09D1.10	antisense	coding
chrII	14738193	A	Y54E2A.1	antisense	intron
chrII	62230	A	C23H3.2	sense	intron
chrII	15217434	A	spsb-1	sense	intron
chrII	15105839	A	Y53F4B.21	sense	intron
chrII	13339428	A	Y48C3A.10	sense	intron
chrII	13339429	A	Y48C3A.10	sense	intron
chrII	9382694	A	ND	NA	intergenic
chrII	13119161	A	F29C12.4	sense	intron
chrII	12902535	A	clec-65	sense	intron
chrII	6716208	A	T14B4.10	antisense	5utr
chrII	1827638	A	math-41	sense	intron
chrII	13407032	A	efl-2	sense	intron
chrII	13407033	A	efl-2	sense	intron
chrII	3320634	A	ND	NA	intergenic
chrII	3320648	A	ND	NA	intergenic
chrII	3320649	A	ND	NA	intergenic
chrII	383818	A	C03H5.5	antisense	intron
chrII	11197260	A	ND	NA	intergenic
chrII	1827661	A	math-41	sense	intron
chrII	14277458	A	Y54G11A.3	sense	intron
chrII	14277468	A	Y54G11A.3	sense	intron
chrII	14066490	A	ND	NA	intergenic
chrII	1819491	A	fbxa-3	antisense	coding
chrII	2290532	A	ND	NA	intergenic
chrII	14066533	A	ND	NA	intergenic
chrII	15217510	A	spsb-1	sense	intron
chrII	3320691	A	ND	NA	intergenic
chrII	14066469	A	ND	NA	intergenic
chrII	2290551	A	ND	NA	intergenic
chrII	1827706	A	math-41	sense	intron
chrII	15217537	A	spsb-1	sense	intron
chrII	8860546	A	ND	NA	intergenic
chrII	12802954	A	Y46G5A.18	antisense	coding
chrII	6719298	A	tsp-10	sense	intron
chrII	1827727	A	math-41	sense	intron
chrII	1827732	A	math-41	sense	intron
chrII	14277525	A	Y54G11A.3	sense	intron
chrII	1827735	A	math-41	sense	intron
chrII	1827737	A	math-41	sense	intron
chrII	1827738	A	math-41	sense	intron
chrII	14224284	A	Y48B6A.13	antisense	intron
chrII	13475828	A	ND	NA	intergenic
chrII	5669795	A	C25H3.8	antisense	3utr
chrII	15217574	A	spsb-1	sense	intron
chrII	1575851	A	K05F6.10	antisense	coding
chrII	2333615	A	F43C11.8	sense	coding
chrII	62385	A	C23H3.2	sense	intron
chrII	62388	A	C23H3.2	sense	intron
chrII	8534969	A	ND	NA	intergenic
chrII	1827771	A	math-41	sense	intron
chrII	62400	A	C23H3.2	sense	intron
chrII	1827778	A	math-41	sense	intron
chrII	2278340	A	K09F6.6	antisense	coding
chrII	15217605	A	spsb-1	sense	intron
chrII	8534983	A	ND	NA	intergenic
chrII	14256972	A	Y54G11A.1	antisense	intron
chrII	1827786	A	math-41	sense	intron
chrII	62412	A	C23H3.2	sense	intron
chrII	13879117	A	ing-3	sense	intron
chrII	11867640	A	npp-3	antisense	intron
chrII	3800018	A	Y8A9A.2	sense	intron
chrII	3920861	A	F53C3.13	antisense	coding
chrII	1827810	A	math-41	sense	intron
chrII	13417449	A	Y48E1C.1	sense	intron
chrII	62443	A	C23H3.2	sense	intron
chrII	62444	A	C23H3.2	sense	intron
chrII	12680701	A	Y46G5A.2	sense	intron
chrII	2290681	A	ND	NA	intergenic
chrII	1827838	A	math-41	sense	intron
chrII	15105877	A	Y53F4B.21	sense	intron
chrII	1098753	A	pho-14	antisense	coding
chrII	1827844	A	math-41	sense	intron
chrII	6982663	A	C15F1.2	sense	intron
chrII	4482065	A	T05C1.2	antisense	intron
chrII	12131351	A	ND	NA	intergenic
chrII	99352	A	ND	NA	intergenic
chrII	99358	A	ND	NA	intergenic
chrII	4125733	A	rhgf-2	sense	intron
chrII	7451695	A	ND	NA	intergenic
chrII	9042993	A	T24B8.7	antisense	intron
chrII	2892850	A	sqv-2	antisense	intron
chrII	14277683	A	Y54G11A.3	sense	intron
chrII	2892852	A	sqv-2	antisense	intron
chrII	1827893	A	math-41	sense	intron
chrII	12238345	A	ND	NA	intergenic
chrII	99386	A	ND	NA	intergenic
chrII	2892859	A	sqv-2	antisense	intron
chrII	13452348	A	pqn-27	antisense	intron
chrII	1827902	A	math-41	sense	intron
chrII	2458805	A	pqn-42	antisense	coding
chrII	13452352	A	pqn-27	antisense	intron
chrII	13452353	A	pqn-27	antisense	intron
chrII	2812994	A	K12H6.2	antisense	coding
chrII	2892868	A	sqv-2	antisense	intron
chrII	13208649	A	btf-1	sense	intron
chrII	1828023	A	math-41	sense	intron
chrII	2892876	A	sqv-2	antisense	intron
chrII	6640717	A	T19D12.6	antisense	coding
chrII	2892880	A	sqv-2	antisense	intron
chrII	226488	A	Y43H11AL.1	antisense	intron
chrII	2892882	A	sqv-2	antisense	intron
chrII	6716259	A	T14B4.10	antisense	5utr
chrII	13417556	A	Y48E1C.1	sense	intron
chrII	13007958	A	oig-2	antisense	intron
chrII	13896791	A	mcd-1	sense	intron
chrII	3320335	A	F39E9.22	sense	coding
chrII	2776156	A	ND	NA	intergenic
chrII	15121502	A	arp-1	sense	intron
chrII	15217509	A	spsb-1	sense	intron
chrII	2776163	A	ND	NA	intergenic
chrII	2776165	A	ND	NA	intergenic
chrII	2776166	A	ND	NA	intergenic
chrII	13452392	A	pqn-27	antisense	intron
chrII	13452394	A	pqn-27	antisense	intron
chrII	13452395	A	pqn-27	antisense	intron
chrII	4125806	A	rhgf-2	sense	intron
chrII	12862576	A	snf-5	antisense	coding
chrII	2776178	A	ND	NA	intergenic
chrII	10855614	A	M106.7	antisense	3utr
chrII	8535161	A	ND	NA	intergenic
chrII	2776186	A	ND	NA	intergenic
chrII	2290818	A	ND	NA	intergenic
chrII	2290819	A	ND	NA	intergenic
chrII	8535176	A	ND	NA	intergenic
chrII	14064777	A	lem-2	sense	intron
chrII	8090771	A	ltd-1	antisense	coding
chrII	7707799	A	B0495.9	antisense	coding
chrII	8535236	A	ND	NA	intergenic
chrII	7787677	A	glr-4	antisense	coding
chrII	13198845	A	lec-1	sense	intron
chrII	226466	A	Y43H11AL.1	antisense	intron
chrII	13417635	A	Y48E1C.1	sense	intron
chrII	5838705	A	ZK1248.19	antisense	coding
chrII	8506536	A	T13H5.1	antisense	coding
chrII	8535213	A	ND	NA	intergenic
chrII	226479	A	Y43H11AL.1	antisense	intron
chrII	3318965	A	F39E9.1	sense	coding
chrII	226487	A	Y43H11AL.1	antisense	intron
chrII	1828024	A	math-41	sense	intron
chrII	4125886	A	rhgf-2	sense	intron
chrII	14066549	A	ND	NA	intergenic
chrII	13417675	A	Y48E1C.1	sense	intron
chrII	1828036	A	math-41	sense	intron
chrII	8441035	A	lips-10	sense	intron
chrII	7942513	A	ZK669.3	sense	coding
chrII	8535250	A	ND	NA	intergenic
chrII	8809684	A	F46C5.9	antisense	coding
chrII	99545	A	ND	NA	intergenic
chrII	8535258	A	ND	NA	intergenic
chrII	13726942	A	bub-3	sense	intron
chrII	13493474	A	F45H10.3	antisense	intron
chrII	2878691	A	ND	NA	intergenic
chrII	4125926	A	rhgf-2	sense	intron
chrII	4125927	A	rhgf-2	sense	intron
chrII	99576	A	ND	NA	intergenic
chrII	99581	A	ND	NA	intergenic
chrII	5596421	A	C17G10.2	sense	3utr
chrII	13417740	A	Y48E1C.1	sense	intron
chrII	14277165	A	Y54G11A.3	sense	intron
chrII	1590544	A	ND	NA	intergenic
chrII	12713238	A	tbc-17	sense	intron
chrII	14800154	A	tbc-20	sense	intron
chrII	6640928	A	T19D12.6	antisense	coding
chrII	14791971	A	Y54E2A.10	sense	intron
chrII	1828141	A	math-41	sense	intron
chrII	1828143	A	math-41	sense	intron
chrII	8103220	A	sfxn-5	antisense	intron
chrII	99656	A	ND	NA	intergenic
chrII	1828170	A	math-41	sense	intron
chrII	99666	A	ND	NA	intergenic
chrII	12281180	A	ife-5	sense	intron
chrII	1828190	A	math-41	sense	intron
chrII	99682	A	ND	NA	intergenic
chrII	13198696	A	lec-1	sense	intron
chrII	9733351	A	ND	NA	intergenic
chrII	1508717	A	H17B01.1	sense	intron
chrII	15222126	A	spsb-1	sense	intron
chrII	1828207	A	math-41	sense	intron
chrII	6090096	A	fbf-2	antisense	coding
chrII	6153613	A	abts-3	sense	coding
chrII	1068439	A	ND	NA	intergenic
chrII	7572888	A	ND	NA	intergenic
chrII	12926363	A	F58G1.3	antisense	intron
chrII	2280862	A	K09F6.9	antisense	3utr
chrII	11759515	A	ND	NA	intergenic
chrII	1828262	A	math-41	sense	intron
chrII	4126128	A	rhgf-2	sense	intron
chrII	4126129	A	rhgf-2	sense	intron
chrII	9461321	A	R09D1.8	antisense	intron
chrII	5342670	A	F09E5.14	antisense	3utr
chrII	11046136	A	F33A8.4	antisense	3utr
chrII	12680659	A	Y46G5A.2	sense	intron
chrII	9350617	A	sdhb-1	antisense	3utr
chrII	9938394	A	C05C10.7	antisense	intron
chrII	4451804	A	twk-2	antisense	coding
chrII	1828319	A	math-41	sense	intron
chrII	329185	A	cbn-1	antisense	intron
chrII	1222115	A	F53A10.2	sense	intron
chrII	3495396	A	Y49F6B.9	antisense	coding
chrII	12680677	A	Y46G5A.2	sense	intron
chrII	13502853	A	F45H10.5	sense	intron
chrII	12281323	A	ife-5	sense	intron
chrII	12238316	A	ND	NA	intergenic
chrII	1222126	A	F53A10.2	sense	intron
chrII	1222131	A	F53A10.2	sense	intron
chrII	12238325	A	ND	NA	intergenic
chrII	12238326	A	ND	NA	intergenic
chrII	8535544	A	ND	NA	intergenic
chrII	8535546	A	ND	NA	intergenic
chrII	12680700	A	Y46G5A.2	sense	intron
chrII	13198848	A	lec-1	sense	intron
chrII	1828357	A	math-41	sense	intron
chrII	1828358	A	math-41	sense	intron
chrII	14717691	A	C09F9.7	antisense	intron
chrII	7069193	A	him-14	antisense	coding
chrII	12238346	A	ND	NA	intergenic
chrII	10941969	A	R03D7.3	antisense	5utr
chrII	10128924	A	F27E5.5	antisense	coding
chrII	6850080	A	tbc-6	sense	intron
chrII	12801569	A	Y46G5A.18	antisense	intron
chrII	14277211	A	Y54G11A.3	sense	intron
chrII	8207914	A	ND	NA	intergenic
chrII	7788077	A	glr-4	antisense	coding
chrII	8818235	A	F46C5.10	antisense	intron
chrII	1828416	A	math-41	sense	intron
chrII	8535619	A	ND	NA	intergenic
chrII	14986824	A	Y53F4B.6	sense	3utr
chrII	8535625	A	ND	NA	intergenic
chrII	1533518	A	ND	NA	intergenic
chrII	3210836	A	ZC239.6	sense	3utr
chrII	1828457	A	math-41	sense	intron
chrII	3210860	A	ZC239.6	sense	3utr
chrII	3210861	A	ZC239.6	sense	3utr
chrII	5236337	A	pho-4	antisense	coding
chrII	8068725	A	T05H10.7	antisense	coding
chrII	3085942	A	Y25C1A.5	sense	intron
chrII	3210877	A	ZC239.6	sense	3utr
chrII	12281471	A	ife-5	sense	intron
chrII	14278272	A	Y54G11A.3	sense	intron
chrII	12238469	A	ND	NA	intergenic
chrII	1827777	A	math-41	sense	intron
chrII	3321483	A	Y46D2A.5	antisense	coding
chrII	3210905	A	ZC239.6	sense	3utr
chrII	6293146	A	mps-1	antisense	coding
chrII	13485730	A	E01G4.6	sense	3utr
chrII	4232869	A	C16A11.10	sense	intron
chrII	12238504	A	ND	NA	intergenic
chrII	7894700	A	ptc-1	sense	intron
chrII	3319473	A	F39E9.1	sense	coding
chrII	12281523	A	ife-5	sense	intron
chrII	12187316	A	Y57A10A.14	sense	intron
chrII	2535093	A	ND	NA	intergenic
chrII	12238521	A	ND	NA	intergenic
chrII	13726951	A	bub-3	sense	intron
chrII	10751681	A	mpz-1	antisense	coding
chrII	8535751	A	ND	NA	intergenic
chrII	12187338	A	Y57A10A.14	sense	intron
chrII	12187345	A	Y57A10A.14	sense	intron
chrII	8535767	A	ND	NA	intergenic
chrII	8535768	A	ND	NA	intergenic
chrII	2174681	A	C33C12.7	antisense	coding
chrII	8535771	A	ND	NA	intergenic
chrII	1828575	A	math-41	sense	intron
chrII	12187361	A	Y57A10A.14	sense	intron
chrII	8535778	A	ND	NA	intergenic
chrII	3210979	A	ZC239.6	sense	3utr
chrII	15217618	A	spsb-1	sense	intron
chrII	3321469	A	Y46D2A.5	antisense	coding
chrII	6221553	A	C30B5.6	antisense	coding
chrII	12809970	A	Y46G5A.19	sense	intron
chrII	12809971	A	Y46G5A.19	sense	intron
chrII	8535800	A	ND	NA	intergenic
chrII	6086394	A	ND	NA	intergenic
chrII	9459452	A	R09D1.14	antisense	coding
chrII	1828609	A	math-41	sense	intron
chrII	6086404	A	ND	NA	intergenic
chrII	13262603	A	ND	NA	intergenic
chrII	13733646	A	ND	NA	intergenic
chrII	6983439	A	C15F1.2	sense	intron
chrII	14277251	A	Y54G11A.3	sense	intron
chrII	14776622	A	Y54E2A.4	sense	intron
chrII	8103702	A	sfxn-5	antisense	intron
chrII	8103703	A	sfxn-5	antisense	intron
chrII	12238617	A	ND	NA	intergenic
chrII	13733662	A	ND	NA	intergenic
chrII	13926177	A	mltn-5	sense	intron
chrII	8103717	A	sfxn-5	antisense	intron
chrII	8103718	A	sfxn-5	antisense	intron
chrII	11370286	A	C33B4.2	antisense	3utr
chrII	1827805	A	math-41	sense	intron
chrII	12681012	A	Y46G5A.2	sense	intron
chrII	12681013	A	Y46G5A.2	sense	intron
chrII	3567414	A	ND	NA	intergenic
chrII	3211066	A	ZC239.6	sense	3utr
chrII	15217507	A	spsb-1	sense	intron
chrII	12281662	A	ife-5	sense	intron
chrII	15105856	A	Y53F4B.21	sense	intron
chrII	7632706	A	pde-4	antisense	coding
chrII	9393987	A	ND	NA	intergenic
chrII	9393995	A	ND	NA	intergenic
chrII	3567437	A	ND	NA	intergenic
chrII	12808016	A	Y46G5A.19	sense	coding
chrII	5625684	A	ND	NA	intergenic
chrII	167765	A	etr-1	sense	intron
chrII	9394006	A	ND	NA	intergenic
chrII	12238680	A	ND	NA	intergenic
chrII	14171997	A	ND	NA	intergenic
chrII	2287457	A	K09F6.10	antisense	coding
chrII	5625700	A	ND	NA	intergenic
chrII	4126574	A	rhgf-2	sense	intron
chrII	2422641	A	F42G2.2	sense	intron
chrII	6721394	A	T14B4.8	antisense	intron
chrII	3211125	A	ZC239.6	sense	3utr
chrII	3211126	A	ZC239.6	sense	3utr
chrII	10387323	A	ztf-27	sense	intron
chrII	5625724	A	ND	NA	intergenic
chrII	5625727	A	ND	NA	intergenic
chrII	5625728	A	ND	NA	intergenic
chrII	6219650	A	ND	NA	intergenic
chrII	10530694	A	mab-10	sense	intron
chrII	8179594	A	T05C12.4	antisense	coding
chrII	15122315	A	arp-1	sense	intron
chrII	12345231	A	ras-1	antisense	3utr
chrII	12238489	A	ND	NA	intergenic
chrII	4126618	A	rhgf-2	sense	intron
chrII	3211163	A	ZC239.6	sense	3utr
chrII	239517	A	ND	NA	intergenic
chrII	5914533	A	cgt-3	sense	intron
chrII	2326439	A	ND	NA	intergenic
chrII	3211182	A	ZC239.6	sense	3utr
chrII	7573424	A	ND	NA	intergenic
chrII	1073074	A	K02E7.4	sense	intron
chrII	6225845	A	C30B5.7	antisense	coding
chrII	3211193	A	ZC239.6	sense	3utr
chrII	11292608	A	C47G2.4	antisense	coding
chrII	13475778	A	ND	NA	intergenic
chrII	3211205	A	ZC239.6	sense	3utr
chrII	12218311	A	pqn-87	antisense	intron
chrII	13475785	A	ND	NA	intergenic
chrII	8660960	A	D2085.6	antisense	coding
chrII	11044837	A	col-83	antisense	coding
chrII	4126694	A	rhgf-2	sense	intron
chrII	12681192	A	Y46G5A.2	sense	intron
chrII	3211243	A	ZC239.6	sense	3utr
chrII	12681197	A	Y46G5A.2	sense	intron
chrII	5756916	A	ND	NA	intergenic
chrII	13475835	A	ND	NA	intergenic
chrII	13475836	A	ND	NA	intergenic
chrX	4339200	A	F14H12.16	antisense	5utr
chrX	11167232	A	F13D2.1	antisense	coding
chrX	1758725	A	ND	NA	intergenic
chrX	17095658	A	C08A9.6	antisense	coding
chrX	11189255	A	F13D2.4	antisense	intron
chrX	316425	A	ND	NA	intergenic
chrX	13336587	A	F46G10.4	sense	3utr
chrX	5014540	A	ZC449.7	sense	intron
chrX	11000066	A	col-177	antisense	coding
chrX	172046	A	ND	NA	intergenic
chrX	9908141	A	ND	NA	intergenic
chrX	15044113	A	fbxa-97	antisense	coding
chrX	4339220	A	ND	NA	intergenic
chrX	316437	A	ND	NA	intergenic
chrX	7021591	A	cah-5	sense	intron
chrX	13336601	A	F46G10.4	sense	3utr
chrX	7021594	A	cah-5	sense	intron
chrX	57371	A	Y73B3A.18	sense	intron
chrX	316446	A	ND	NA	intergenic
chrX	316447	A	ND	NA	intergenic
chrX	16091908	A	ND	NA	intergenic
chrX	13336609	A	F46G10.4	sense	3utr
chrX	5786660	A	F46G11.6	sense	coding
chrX	13336613	A	F46G10.4	sense	3utr
chrX	15951751	A	ND	NA	intergenic
chrX	14176508	A	C37E2.2	sense	intron
chrX	11399209	A	slo-2	antisense	coding
chrX	9908266	A	ND	NA	intergenic
chrX	9908267	A	ND	NA	intergenic
chrX	7169002	A	bar-1	antisense	coding
chrX	11008605	A	ttr-31	antisense	intron
chrX	316465	A	ND	NA	intergenic
chrX	13336626	A	F46G10.4	sense	3utr
chrX	17300532	A	ND	NA	intergenic
chrX	11853662	A	ND	NA	intergenic
chrX	3728393	A	nlp-1	sense	3utr
chrX	11417145	A	F46C3.2	antisense	intron
chrX	9908282	A	ND	NA	intergenic
chrX	172603	A	ND	NA	intergenic
chrX	16223708	A	ND	NA	intergenic
chrX	8073659	A	ND	NA	intergenic
chrX	5159487	A	C31H2.4	antisense	coding
chrX	11524672	A	sdc-2	sense	coding
chrX	13336660	A	F46G10.4	sense	3utr
chrX	4867650	A	tsp-14	antisense	intron
chrX	14176835	A	C37E2.2	sense	intron
chrX	17005636	A	mbl-1	sense	intron
chrX	13336640	A	F46G10.4	sense	3utr
chrX	2545222	A	F52H2.4	antisense	intron
chrX	7021641	A	cah-5	sense	intron
chrX	7021642	A	cah-5	sense	intron
chrX	2170958	A	F48B9.2	sense	intron
chrX	15769613	A	Y7A5A.1	antisense	intron
chrX	9908304	A	ND	NA	intergenic
chrX	3051601	A	twk-26	antisense	coding
chrX	9908819	A	F21G4.6	antisense	3utr
chrX	7857748	A	cca-1	antisense	coding
chrX	17205262	A	ND	NA	intergenic
chrX	7021654	A	cah-5	sense	intron
chrX	14176527	A	C37E2.2	sense	intron
chrX	15849997	A	acl-1	sense	coding
chrX	9306554	A	B0416.1	sense	coding
chrX	16223838	A	ND	NA	intergenic
chrX	8344848	A	F55E10.6	antisense	coding
chrX	2170979	A	F48B9.2	sense	intron
chrX	2170980	A	F48B9.2	sense	intron
chrX	12811878	A	gei-3	antisense	coding
chrX	9349222	A	ND	NA	intergenic
chrX	13691367	A	adm-2	sense	intron
chrX	3599979	A	cgr-1	antisense	intron
chrX	2030703	A	Y102A11A.2	sense	intron
chrX	14177551	A	C37E2.2	sense	intron
chrX	14176470	A	C37E2.2	sense	intron
chrX	15671922	A	F59D12.1	sense	3utr
chrX	16033908	A	mboa-1	sense	intron
chrX	16223701	A	ND	NA	intergenic
chrX	15769620	A	Y7A5A.1	antisense	intron
chrX	15951996	A	ND	NA	intergenic
chrX	4221054	A	ND	NA	intergenic
chrX	10950677	A	K09C8.7	antisense	3utr
chrX	9346181	A	oga-1	antisense	coding
chrX	9908386	A	ND	NA	intergenic
chrX	841352	A	F39H12.3	antisense	coding
chrX	9916553	A	F21G4.6	antisense	coding
chrX	54922	A	Y73B3A.18	sense	intron
chrX	4459659	A	atg-16.1	antisense	3utr
chrX	4221068	A	ND	NA	intergenic
chrX	9908674	A	ND	NA	intergenic
chrX	54926	A	Y73B3A.18	sense	intron
chrX	240271	A	AC8.12	sense	coding
chrX	2175120	A	F48B9.8	antisense	intron
chrX	57489	A	Y73B3A.18	sense	intron
chrX	16223683	A	ND	NA	intergenic
chrX	7807126	A	R03G5.7	antisense	5utr
chrX	9908642	A	ND	NA	intergenic
chrX	11322009	A	asm-2	antisense	coding
chrX	2114717	A	F53B1.6	antisense	3utr
chrX	13418145	A	C29F7.2	sense	3utr
chrX	6284962	A	T07H6.4	antisense	coding
chrX	9908387	A	ND	NA	intergenic
chrX	9908390	A	ND	NA	intergenic
chrX	12689777	A	ND	NA	intergenic
chrX	7670440	A	F27D9.7	antisense	intron
chrX	7957673	A	sfxn-2	antisense	coding
chrX	8901063	A	ND	NA	intergenic
chrX	16223663	A	ND	NA	intergenic
chrX	6732975	A	R03E9.2	antisense	intron
chrX	17556101	A	F31A3.5	antisense	coding
chrX	13231015	A	K08H2.9	antisense	coding
chrX	983226	A	ND	NA	intergenic
chrX	57531	A	Y73B3A.18	sense	intron
chrX	3178175	A	klp-4	antisense	coding
chrX	16223687	A	ND	NA	intergenic
chrX	15952067	A	ND	NA	intergenic
chrX	9296068	A	gly-13	antisense	coding
chrX	13336261	A	F46G10.4	sense	3utr
chrX	14176454	A	C37E2.2	sense	intron
chrX	14177313	A	C37E2.2	sense	intron
chrX	7093962	A	C36B7.5	antisense	coding
chrX	10677451	A	ND	NA	intergenic
chrX	7795404	A	adm-4	antisense	coding
chrX	16223952	A	ND	NA	intergenic
chrX	674515	A	lgc-32	sense	intron
chrX	57557	A	Y73B3A.18	sense	intron
chrX	7891670	A	C39D10.5	antisense	coding
chrX	13336279	A	F46G10.4	sense	3utr
chrX	559832	A	nas-38	sense	intron
chrX	4337369	A	ND	NA	intergenic
chrX	57562	A	Y73B3A.18	sense	intron
chrX	15952093	A	ND	NA	intergenic
chrX	15769637	A	Y7A5A.1	antisense	intron
chrX	8868066	A	ubc-22	antisense	intron
chrX	2605795	A	nhr-40	sense	intron
chrX	13336292	A	F46G10.4	sense	3utr
chrX	9908453	A	ND	NA	intergenic
chrX	14176736	A	C37E2.2	sense	intron
chrX	57579	A	Y73B3A.18	sense	intron
chrX	16223980	A	ND	NA	intergenic
chrX	14176497	A	C37E2.2	sense	intron
chrX	2605810	A	nhr-40	sense	intron
chrX	8293587	A	F13B9.1	sense	intron
chrX	57470	A	Y73B3A.18	sense	intron
chrX	12879571	A	bcat-1	sense	intron
chrX	14850089	A	tag-324	sense	intron
chrX	11325689	A	ZK455.5	antisense	intron
chrX	15369979	A	tag-97	antisense	3utr
chrX	7504124	A	lgc-11	antisense	coding
chrX	264405	A	ND	NA	intergenic
chrX	953090	A	arr-1	sense	intron
chrX	16956203	A	ND	NA	intergenic
chrX	57604	A	Y73B3A.18	sense	intron
chrX	13552342	A	glb-20	antisense	3utr
chrX	15769600	A	Y7A5A.1	antisense	intron
chrX	13533057	A	acr-12	sense	coding
chrX	5680394	A	set-20	antisense	3utr
chrX	13336331	A	F46G10.4	sense	3utr
chrX	13336332	A	F46G10.4	sense	3utr
chrX	10104591	A	unc-58	antisense	3utr
chrX	5839120	A	dct-11	antisense	intron
chrX	13336280	A	F46G10.4	sense	3utr
chrX	13336585	A	F46G10.4	sense	3utr
chrX	13336622	A	F46G10.4	sense	3utr
chrX	6283481	A	T07H6.4	antisense	intron
chrX	7512860	A	F48E3.8	antisense	coding
chrX	4737754	A	aman-1	sense	coding
chrX	16162169	A	F09C8.1	antisense	coding
chrX	16956192	A	ND	NA	intergenic
chrX	12048677	A	B0198.3	antisense	intron
chrX	17623848	A	H18N23.2	antisense	intron
chrX	9908019	A	ND	NA	intergenic
chrX	8901025	A	ND	NA	intergenic
chrX	9908011	A	ND	NA	intergenic
chrX	983341	A	ND	NA	intergenic
chrX	11964207	A	ND	NA	intergenic
chrX	13245744	A	hpl-1	sense	coding
chrX	15951752	A	ND	NA	intergenic
chrX	13336370	A	F46G10.4	sense	3utr
chrX	7855923	A	cca-1	antisense	coding
chrX	4335924	A	cst-2	antisense	intron
chrX	412470	A	ZK1193.2	antisense	coding
chrX	751416	A	aex-3	antisense	3utr
chrX	9908020	A	ND	NA	intergenic
chrX	14176735	A	C37E2.2	sense	intron
chrX	7693629	A	kvs-1	antisense	coding
chrX	15769636	A	Y7A5A.1	antisense	intron
chrX	6871872	A	ND	NA	intergenic
chrX	10371040	A	Y49A10A.2	antisense	3utr
chrX	13410626	A	ND	NA	intergenic
chrX	15193227	A	phat-6	antisense	intron
chrX	5886790	A	flp-7	sense	3utr
chrX	13336290	A	F46G10.4	sense	3utr
chrX	13472081	A	ND	NA	intergenic
chrX	8293714	A	F13B9.1	sense	intron
chrX	5014499	A	ZC449.7	sense	coding
chrX	13336306	A	F46G10.4	sense	3utr
chrX	5722454	A	rgs-6	antisense	coding
chrX	2486415	A	K02E10.4	sense	intron
chrX	171868	A	ND	NA	intergenic
chrX	10530576	A	slcf-1	sense	intron
chrX	6918715	A	nhx-4	sense	coding
chrX	9295775	A	gly-13	antisense	coding
chrX	57318	A	Y73B3A.18	sense	intron
chrX	16223804	A	ND	NA	intergenic
chrX	13336281	A	F46G10.4	sense	3utr
chrX	6600043	A	ND	NA	intergenic
chrX	7151469	A	C54D1.9	sense	3utr
chrX	8701807	A	F53A9.5	sense	coding
chrX	6383985	A	igcm-2	antisense	intron
chrX	6129523	A	ND	NA	intergenic
chrX	14810023	A	atf-5	antisense	intron
chrX	9651484	A	aex-2	antisense	coding
chrX	57207	A	Y73B3A.18	sense	intron
chrX	57209	A	Y73B3A.18	sense	intron
chrX	9237429	A	lgc-4	antisense	coding
chrX	418173	A	ZK1193.3	antisense	coding
chrX	17395582	A	vap-1	antisense	coding
chrX	11007359	A	F59F3.4	antisense	intron
chrX	13336384	A	F46G10.4	sense	3utr
chrX	4491649	A	F46H6.5	antisense	3utr
chrX	8162178	A	F22F1.3	antisense	coding
chrX	3617155	A	C18B2.6	antisense	coding
chrX	2284932	A	sav-1	antisense	coding
chrX	9908118	A	ND	NA	intergenic
chrX	9908102	A	ND	NA	intergenic
chrX	9908103	A	ND	NA	intergenic
chrX	11763080	A	lact-7	sense	intron
chrX	6233482	A	hsp-43	antisense	coding
chrX	57228	A	Y73B3A.18	sense	intron
chrX	16223810	A	ND	NA	intergenic
chrX	16903391	A	F39F10.4	antisense	intron
chrX	8901026	A	ND	NA	intergenic
chrX	9908112	A	ND	NA	intergenic
chrX	9908113	A	ND	NA	intergenic
chrX	14718019	A	tag-53	sense	intron
chrX	16223636	A	ND	NA	intergenic
chrX	7021974	A	cah-5	sense	intron
chrX	14514071	A	D1025.2	antisense	3utr
chrX	8073634	A	ND	NA	intergenic
chrX	9908633	A	ND	NA	intergenic
chrX	9908634	A	ND	NA	intergenic
chrX	57243	A	Y73B3A.18	sense	intron
chrX	16223645	A	ND	NA	intergenic
chrX	296863	A	ND	NA	intergenic
chrX	9945504	A	nas-37	antisense	intron
chrX	57249	A	Y73B3A.18	sense	intron
chrX	1011618	A	rncs-1	sense	3utr
chrX	16223643	A	ND	NA	intergenic
chrX	8344738	A	F55E10.6	antisense	3utr
chrX	9804653	A	lgc-47	antisense	intron
chrX	9908140	A	ND	NA	intergenic
chrX	58797	A	Y73B3A.18	sense	intron
chrX	15055278	A	ND	NA	intergenic
chrX	8073647	A	ND	NA	intergenic
chrX	58800	A	Y73B3A.18	sense	intron
chrX	57266	A	Y73B3A.18	sense	intron
chrX	13336307	A	F46G10.4	sense	3utr
chrX	14659508	A	syg-2	sense	coding
chrX	316408	A	ND	NA	intergenic
chrX	9908150	A	ND	NA	intergenic
chrX	5538231	A	lgx-1	antisense	coding
chrX	8073658	A	ND	NA	intergenic
chrX	172475	A	ND	NA	intergenic
chrX	16063420	A	ND	NA	intergenic
chrX	13336650	A	F46G10.4	sense	3utr
chrX	8901056	A	ND	NA	intergenic
chrX	15855553	A	F53H4.6	antisense	coding
chrX	753090	A	aex-3	antisense	intron
chrX	9908675	A	ND	NA	intergenic
chrX	13336310	A	F46G10.4	sense	3utr
chrX	7797702	A	adm-4	antisense	coding
chrX	230855	A	AC8.7	sense	coding
chrX	13691336	A	adm-2	sense	intron
chrX	3598793	A	cgr-1	antisense	intron
chrX	172491	A	ND	NA	intergenic
chrX	7022029	A	cah-5	sense	intron
chrX	16223943	A	ND	NA	intergenic
chrX	14989133	A	F20D1.7	antisense	coding
chrX	16223696	A	ND	NA	intergenic
chrX	1011665	A	rncs-1	sense	3utr
chrX	17052626	A	gcy-11	antisense	intron
chrX	246227	A	pme-6	antisense	intron
chrX	57300	A	Y73B3A.18	sense	intron
chrX	13375957	A	C49F8.2	antisense	coding
chrX	11444985	A	F48C5.1	antisense	intron
chrX	1429464	A	F19G12.2	sense	intron
chrX	6407130	A	ND	NA	intergenic
chrX	15951835	A	ND	NA	intergenic
chrX	13691356	A	adm-2	sense	intron
chrX	16223709	A	ND	NA	intergenic
chrX	12150750	A	M153.4	sense	coding
chrX	296416	A	ND	NA	intergenic
chrX	13473761	A	tre-4	sense	intron
chrX	58851	A	Y73B3A.18	sense	coding
chrX	58852	A	Y73B3A.18	sense	coding
chrX	1011685	A	rncs-1	sense	3utr
chrX	2257894	A	crn-4	antisense	coding
chrX	13336657	A	F46G10.4	sense	3utr
chrX	13336553	A	F46G10.4	sense	3utr
chrX	380394	A	R04A9.3	antisense	intron
chrX	8901031	A	ND	NA	intergenic
chrX	8720210	A	F53A9.9	antisense	3utr
chrX	1141742	A	R193.2	antisense	intron
chrX	13310450	A	F46G10.1	antisense	intron
chrX	13336659	A	F46G10.4	sense	3utr
chrX	15721461	A	ZK662.5	sense	intron
chrX	453110	A	pqn-40	antisense	intron
chrX	316407	A	ND	NA	intergenic
chrX	3051512	A	twk-26	antisense	coding
chrX	11234297	A	C34F6.10	antisense	intron
chrX	16903672	A	F39F10.4	antisense	intron
chrX	11321787	A	asm-2	antisense	intron
chrX	14177621	A	C37E2.2	sense	intron
chrIII	9551873	A	unc-16	sense	intron
chrIII	7362563	A	numr-1	antisense	coding
chrIII	11151364	A	Y47D3A.29	sense	intron
chrIII	12926981	A	Y37D8A.18	sense	intron
chrIII	13350929	A	mtm-6	sense	intron
chrIII	13350930	A	mtm-6	sense	intron
chrIII	299027	A	Y50D7A.1	sense	intron
chrIII	12927002	A	Y37D8A.18	sense	intron
chrIII	12927003	A	Y37D8A.18	sense	intron
chrIII	200733	A	F40G9.17	sense	intron
chrIII	11525808	A	Y66D12A.16	sense	intron
chrIII	12697634	A	ND	NA	intergenic
chrIII	10276905	A	cnk-1	sense	intron
chrIII	522285	A	T22F7.3	antisense	coding
chrIII	5775407	A	Y37B11A.2	antisense	coding
chrIII	12419120	A	tat-1	antisense	intron
chrIII	12466226	A	ND	NA	intergenic
chrIII	12521524	A	Y111B2A.4	sense	intron
chrIII	200757	A	F40G9.17	sense	intron
chrIII	11803316	A	ND	NA	intergenic
chrIII	12466236	A	ND	NA	intergenic
chrIII	12521541	A	Y111B2A.4	sense	intron
chrIII	13197766	A	gly-5	sense	intron
chrIII	200780	A	F40G9.17	sense	intron
chrIII	12466253	A	ND	NA	intergenic
chrIII	12466260	A	ND	NA	intergenic
chrIII	200789	A	F40G9.17	sense	intron
chrIII	2707542	A	ND	NA	intergenic
chrIII	2707543	A	ND	NA	intergenic
chrIII	1093720	A	par-2	sense	intron
chrIII	12707014	A	Y111B2A.24	sense	intron
chrIII	12533851	A	Y111B2A.25	sense	intron
chrIII	13203549	A	gly-5	sense	intron
chrIII	3514463	A	hmit-1.3	antisense	intron
chrIII	12460129	A	Y49E10.21	sense	intron
chrIII	200802	A	F40G9.17	sense	intron
chrIII	9513068	A	ND	NA	intergenic
chrIII	2707569	A	ND	NA	intergenic
chrIII	2707570	A	ND	NA	intergenic
chrIII	12461075	A	Y49E10.21	sense	intron
chrIII	2582644	A	ND	NA	intergenic
chrIII	2707573	A	ND	NA	intergenic
chrIII	12222586	A	Y75B8A.16	sense	intron
chrIII	3932285	A	ND	NA	intergenic
chrIII	12927102	A	Y37D8A.18	sense	intron
chrIII	5273621	A	ZC395.10	antisense	intron
chrIII	13322370	A	F53A2.1	antisense	coding
chrIII	3180679	A	R148.3	sense	intron
chrIII	2783371	A	Y71H2AM.20	antisense	intron
chrIII	3180686	A	R148.3	sense	intron
chrIII	2582671	A	ND	NA	intergenic
chrIII	5460115	A	ND	NA	intergenic
chrIII	9323204	A	cpb-1	sense	coding
chrIII	13199523	A	gly-5	sense	intron
chrIII	2582692	A	ND	NA	intergenic
chrIII	10475690	A	ND	NA	intergenic
chrIII	10475691	A	ND	NA	intergenic
chrIII	1390768	A	Y82E9BR.13	antisense	coding
chrIII	12622889	A	ND	NA	intergenic
chrIII	2582706	A	ND	NA	intergenic
chrIII	2783414	A	Y71H2AM.20	antisense	intron
chrIII	12503229	A	Y111B2A.4	sense	intron
chrIII	6854850	A	zak-1	antisense	coding
chrIII	8198343	A	unc-36	antisense	intron
chrIII	8014026	A	F44B9.5	antisense	intron
chrIII	5382348	A	Y32H12A.7	antisense	3utr
chrIII	12533966	A	Y111B2A.25	sense	intron
chrIII	12742863	A	ssl-1	sense	intron
chrIII	1398999	A	Y82E9BR.4	sense	intron
chrIII	6193368	A	C23G10.6	antisense	intron
chrIII	8587485	A	glr-1	antisense	coding
chrIII	2105567	A	ppk-2	sense	intron
chrIII	12697828	A	ND	NA	intergenic
chrIII	12460261	A	Y49E10.21	sense	intron
chrIII	5210342	A	ND	NA	intergenic
chrIII	1399016	A	Y82E9BR.4	sense	intron
chrIII	1399017	A	Y82E9BR.4	sense	intron
chrIII	12715047	A	ssl-1	sense	intron
chrIII	12376301	A	pph-4.2	antisense	intron
chrIII	6889710	A	ND	NA	intergenic
chrIII	12697840	A	ND	NA	intergenic
chrIII	12521513	A	Y111B2A.4	sense	intron
chrIII	13283028	A	unc-64	sense	intron
chrIII	7080191	A	ZK418.7	antisense	intron
chrIII	12071170	A	zyg-8	sense	intron
chrIII	13203159	A	gly-5	sense	intron
chrIII	12460300	A	Y49E10.21	sense	intron
chrIII	11974925	A	Y56A3A.30	antisense	intron
chrIII	12466223	A	ND	NA	intergenic
chrIII	12466224	A	ND	NA	intergenic
chrIII	13203149	A	gly-5	sense	intron
chrIII	10565929	A	ND	NA	intergenic
chrIII	201002	A	F40G9.17	sense	intron
chrIII	201004	A	F40G9.17	sense	intron
chrIII	13379788	A	T03F6.6	antisense	coding
chrIII	11923166	A	Y56A3A.22	sense	intron
chrIII	1093946	A	par-2	sense	intron
chrIII	12927293	A	Y37D8A.18	sense	intron
chrIII	12160053	A	ND	NA	intergenic
chrIII	12933441	A	ND	NA	intergenic
chrIII	2015557	A	ckr-2	antisense	coding
chrIII	201030	A	F40G9.17	sense	intron
chrIII	12622904	A	ND	NA	intergenic
chrIII	13201748	A	gly-5	sense	intron
chrIII	13201753	A	gly-5	sense	intron
chrIII	5226842	A	C34E10.10	antisense	3utr
chrIII	1974625	A	R155.3	antisense	coding
chrIII	12623163	A	ND	NA	intergenic
chrIII	11993489	A	wah-1	sense	intron
chrIII	1093993	A	par-2	sense	intron
chrIII	1093994	A	par-2	sense	intron
chrIII	12731111	A	ssl-1	sense	intron
chrIII	12520510	A	Y111B2A.4	sense	intron
chrIII	13201785	A	gly-5	sense	intron
chrIII	5460348	A	ND	NA	intergenic
chrIII	2822535	A	Y71H2AM.2	sense	intron
chrIII	12503434	A	Y111B2A.4	sense	intron
chrIII	13201803	A	gly-5	sense	intron
chrIII	2822544	A	Y71H2AM.2	sense	intron
chrIII	1575313	A	rep-1	sense	intron
chrIII	11510164	A	Y66D12A.19	sense	intron
chrIII	13201816	A	gly-5	sense	intron
chrIII	13199770	A	gly-5	sense	intron
chrIII	12460446	A	Y49E10.21	sense	intron
chrIII	12697669	A	ND	NA	intergenic
chrIII	11151363	A	Y47D3A.29	sense	intron
chrIII	12927393	A	Y37D8A.18	sense	intron
chrIII	10221987	A	T20G5.14	sense	intron
chrIII	10221988	A	T20G5.14	sense	intron
chrIII	3637669	A	C32A3.3	sense	intron
chrIII	264614	A	ND	NA	intergenic
chrIII	13199783	A	gly-5	sense	intron
chrIII	12698025	A	ND	NA	intergenic
chrIII	12460459	A	Y49E10.21	sense	intron
chrIII	12451448	A	ani-1	antisense	intron
chrIII	9314740	A	C40H1.8	sense	intron
chrIII	12460469	A	Y49E10.21	sense	intron
chrIII	13398455	A	F11F1.1	sense	intron
chrIII	13199804	A	gly-5	sense	intron
chrIII	13281727	A	unc-64	sense	intron
chrIII	7750082	A	cdh-3	antisense	coding
chrIII	10222020	A	T20G5.14	sense	intron
chrIII	12698053	A	ND	NA	intergenic
chrIII	9568710	A	C48B4.13	sense	intron
chrIII	9568711	A	C48B4.13	sense	intron
chrIII	8755276	A	sma-2	sense	intron
chrIII	12159735	A	ND	NA	intergenic
chrIII	5460431	A	ND	NA	intergenic
chrIII	5460432	A	ND	NA	intergenic
chrIII	5460433	A	ND	NA	intergenic
chrIII	13199779	A	gly-5	sense	intron
chrIII	5460439	A	ND	NA	intergenic
chrIII	4778457	A	B0393.9	antisense	coding
chrIII	12698021	A	ND	NA	intergenic
chrIII	5210593	A	ND	NA	intergenic
chrIII	12712418	A	hut-1	sense	intron
chrIII	12521955	A	Y111B2A.4	sense	intron
chrIII	5460454	A	ND	NA	intergenic
chrIII	5460455	A	ND	NA	intergenic
chrIII	5460457	A	ND	NA	intergenic
chrIII	12698090	A	ND	NA	intergenic
chrIII	850421	A	ND	NA	intergenic
chrIII	1407483	A	Y82E9BR.22	antisense	intron
chrIII	11803132	A	twk-39	sense	coding
chrIII	11981309	A	ND	NA	intergenic
chrIII	13201918	A	gly-5	sense	intron
chrIII	12511318	A	Y111B2A.4	sense	intron
chrIII	11975174	A	Y56A3A.30	antisense	intron
chrIII	850447	A	ND	NA	intergenic
chrIII	13201942	A	gly-5	sense	intron
chrIII	13259294	A	F56A8.3	sense	intron
chrIII	11518494	A	such-1	antisense	intron
chrIII	1407519	A	Y82E9BR.22	antisense	intron
chrIII	12692000	A	Y111B2A.19	sense	intron
chrIII	11518501	A	such-1	antisense	intron
chrIII	11518502	A	such-1	antisense	intron
chrIII	7084585	A	ZK418.8	antisense	coding
chrIII	12460592	A	Y49E10.21	sense	intron
chrIII	11518514	A	such-1	antisense	intron
chrIII	9202227	A	ZC84.1	antisense	coding
chrIII	12071478	A	zyg-8	sense	intron
chrIII	12247607	A	tim-1	antisense	intron
chrIII	12247608	A	tim-1	antisense	intron
chrIII	12534330	A	Y111B2A.25	sense	intron
chrIII	13201979	A	gly-5	sense	intron
chrIII	13201980	A	gly-5	sense	intron
chrIII	13199114	A	gly-5	sense	intron
chrIII	12223038	A	Y75B8A.16	sense	intron
chrIII	12511669	A	Y111B2A.4	sense	intron
chrIII	12521214	A	Y111B2A.4	sense	intron
chrIII	12610315	A	Y111B2A.12	sense	intron
chrIII	850500	A	ND	NA	intergenic
chrIII	13259333	A	F56A8.3	sense	intron
chrIII	12520464	A	Y111B2A.4	sense	intron
chrIII	12515911	A	Y111B2A.4	sense	intron
chrIII	12247628	A	tim-1	antisense	intron
chrIII	12697698	A	ND	NA	intergenic
chrIII	13281871	A	unc-64	sense	intron
chrIII	13202015	A	gly-5	sense	intron
chrIII	11852385	A	Y56A3A.2	antisense	intron
chrIII	12712553	A	hut-1	sense	intron
chrIII	858731	A	K02F3.12	sense	intron
chrIII	13281902	A	unc-64	sense	intron
chrIII	12159599	A	ND	NA	intergenic
chrIII	12159601	A	ND	NA	intergenic
chrIII	6374003	A	thoc-2	sense	intron
chrIII	1407605	A	Y82E9BR.22	antisense	intron
chrIII	6701687	A	rbf-1	sense	intron
chrIII	6701688	A	rbf-1	sense	intron
chrIII	200468	A	F40G9.17	sense	intron
chrIII	12159610	A	ND	NA	intergenic
chrIII	12926980	A	Y37D8A.18	sense	intron
chrIII	13203564	A	gly-5	sense	intron
chrIII	948875	A	fbxa-23	antisense	coding
chrIII	1403533	A	ND	NA	intergenic
chrIII	12071576	A	zyg-8	sense	intron
chrIII	13314716	A	ND	NA	intergenic
chrIII	12623301	A	ND	NA	intergenic
chrIII	12715024	A	ssl-1	sense	intron
chrIII	11182875	A	tra-1	antisense	intron
chrIII	7023046	A	rfl-1	sense	coding
chrIII	2730662	A	Y71H2AM.7	sense	intron
chrIII	4242088	A	F43C1.7	antisense	intron
chrIII	12423850	A	ND	NA	intergenic
chrIII	12672784	A	taf-7.2	antisense	intron
chrIII	12159665	A	ND	NA	intergenic
chrIII	13314738	A	ND	NA	intergenic
chrIII	8334004	A	ZC262.4	antisense	intron
chrIII	12698057	A	ND	NA	intergenic
chrIII	3131508	A	ND	NA	intergenic
chrIII	12712634	A	hut-1	sense	intron
chrIII	12071611	A	zyg-8	sense	intron
chrIII	11926206	A	nft-1	sense	intron
chrIII	12071616	A	zyg-8	sense	intron
chrIII	5460674	A	ND	NA	intergenic
chrIII	948932	A	fbxa-23	antisense	coding
chrIII	12739269	A	ssl-1	sense	intron
chrIII	5460679	A	ND	NA	intergenic
chrIII	12712649	A	hut-1	sense	intron
chrIII	12710602	A	ND	NA	intergenic
chrIII	11803341	A	ND	NA	intergenic
chrIII	5460689	A	ND	NA	intergenic
chrIII	12159698	A	ND	NA	intergenic
chrIII	13290196	A	set-25	antisense	intron
chrIII	12159702	A	ND	NA	intergenic
chrIII	12159704	A	ND	NA	intergenic
chrIII	12710622	A	ND	NA	intergenic
chrIII	5460705	A	ND	NA	intergenic
chrIII	9171682	A	ina-1	antisense	coding
chrIII	10222033	A	T20G5.14	sense	intron
chrIII	5460715	A	ND	NA	intergenic
chrIII	1403629	A	ND	NA	intergenic
chrIII	5460719	A	ND	NA	intergenic
chrIII	12159728	A	ND	NA	intergenic
chrIII	799475	A	B0412.3	sense	intron
chrIII	12159733	A	ND	NA	intergenic
chrIII	5460727	A	ND	NA	intergenic
chrIII	12159740	A	ND	NA	intergenic
chrIII	11389697	A	nlp-21	antisense	intron
chrIII	11576069	A	Y66D12A.8	sense	intron
chrIII	12610310	A	Y111B2A.12	sense	intron
chrIII	5460743	A	ND	NA	intergenic
chrIII	13255824	A	F56A8.9	sense	intron
chrIII	5460747	A	ND	NA	intergenic
chrIII	5460748	A	ND	NA	intergenic
chrIII	1403662	A	ND	NA	intergenic
chrIII	1403663	A	ND	NA	intergenic
chrIII	1403664	A	ND	NA	intergenic
chrIII	1403665	A	ND	NA	intergenic
chrIII	11524887	A	Y66D12A.16	sense	intron
chrIII	13259327	A	F56A8.3	sense	intron
chrIII	2878233	A	klf-1	sense	intron
chrIII	8842011	A	ND	NA	intergenic
chrIII	10638117	A	ND	NA	intergenic
chrIII	6540074	A	C09E7.5	antisense	intron
chrIII	12286764	A	mrp-8	antisense	coding
chrIII	10638138	A	ND	NA	intergenic
chrIII	13259231	A	F56A8.3	sense	intron
chrIII	6540095	A	C09E7.5	antisense	intron
chrIII	10935105	A	M142.8	sense	intron
chrIII	873282	A	T24C4.4	antisense	intron
chrIII	13314885	A	ND	NA	intergenic
chrIII	13314886	A	ND	NA	intergenic
chrIII	12698054	A	ND	NA	intergenic
chrIII	5460816	A	ND	NA	intergenic
chrIII	3347282	A	gei-1	sense	coding
chrIII	12743139	A	ssl-1	sense	intron
chrIII	12512084	A	Y111B2A.4	sense	intron
chrIII	10475662	A	ND	NA	intergenic
chrIII	5460827	A	ND	NA	intergenic
chrIII	5460830	A	ND	NA	intergenic
chrIII	11524961	A	Y66D12A.16	sense	intron
chrIII	4594530	A	asb-1	antisense	3utr
chrIII	12899178	A	ND	NA	intergenic
chrIII	9085075	A	F02A9.4	antisense	coding
chrIII	8999797	A	rpn-6.2	antisense	3utr
chrIII	5460860	A	ND	NA	intergenic
chrIII	1164157	A	cdh-12	sense	coding
chrIII	5460863	A	ND	NA	intergenic
chrIII	13779849	A	pot-3	sense	intron
chrIII	13202853	A	gly-5	sense	intron
chrIII	12534387	A	Y111B2A.25	sense	intron
chrIII	2313108	A	ND	NA	intergenic
chrIII	12223382	A	Y75B8A.16	sense	intron
chrIII	5460887	A	ND	NA	intergenic
chrIII	1579929	A	Y22D7AL.7	sense	intron
chrIII	5460895	A	ND	NA	intergenic
chrIII	5460899	A	ND	NA	intergenic
chrIII	2313128	A	ND	NA	intergenic
chrIII	5460908	A	ND	NA	intergenic
chrIII	4199341	A	asd-1	sense	intron
chrIII	5460910	A	ND	NA	intergenic
chrIII	4199343	A	asd-1	sense	intron
chrIII	1579952	A	Y22D7AL.7	sense	intron
chrIII	5460919	A	ND	NA	intergenic
chrIII	12731323	A	ssl-1	sense	intron
chrIII	7474110	A	ND	NA	intergenic
chrIII	12170974	A	ND	NA	intergenic
chrIII	12512197	A	Y111B2A.4	sense	intron
chrIII	7603142	A	ND	NA	intergenic
chrIII	12622792	A	ND	NA	intergenic
chrIII	9913017	A	F40F12.9	sense	intron
chrIII	12700622	A	Y111B2A.24	sense	intron
chrIII	11009869	A	exos-1	sense	intron
chrIII	12700626	A	Y111B2A.24	sense	intron
chrIII	4778965	A	B0393.9	antisense	intron
chrIII	12622807	A	ND	NA	intergenic
chrIII	12700632	A	Y111B2A.24	sense	intron
chrIII	12700635	A	Y111B2A.24	sense	intron
chrIII	13020124	A	col-98	sense	3utr
chrIII	6143141	A	wht-7	antisense	coding
chrIII	12622817	A	ND	NA	intergenic
chrIII	12622818	A	ND	NA	intergenic
chrIII	12700643	A	Y111B2A.24	sense	intron
chrIII	7078884	A	ZK418.7	antisense	3utr
chrIII	9262053	A	M01A8.2	antisense	coding
chrIII	1403879	A	ND	NA	intergenic
chrIII	304295	A	Y50D7A.1	sense	intron
chrIII	10949612	A	strd-1	sense	intron
chrIII	12970989	A	Y39E4A.3	antisense	intron
chrIII	12622830	A	ND	NA	intergenic
chrIII	12622831	A	ND	NA	intergenic
chrIII	13257896	A	F56A8.3	sense	intron
chrIII	13257715	A	F56A8.3	sense	intron
chrIII	13257719	A	F56A8.3	sense	intron
chrIII	12159993	A	ND	NA	intergenic
chrIII	13616122	A	hip-1	antisense	intron
chrIII	9075707	A	ND	NA	intergenic
chrIII	12622844	A	ND	NA	intergenic
chrIII	13134846	A	bre-2	antisense	intron
chrIII	12160002	A	ND	NA	intergenic
chrIII	607235	A	T19C3.1	antisense	intron
chrIII	7992325	A	npr-17	antisense	coding
chrIII	12622856	A	ND	NA	intergenic
chrIII	12160054	A	ND	NA	intergenic
chrIII	7027724	A	cyk-1	antisense	coding
chrIII	12511682	A	Y111B2A.4	sense	intron
chrIII	1877507	A	ND	NA	intergenic
chrIII	12213531	A	Y75B8A.13	antisense	coding
chrIII	12160026	A	ND	NA	intergenic
chrIII	861212	A	exos-4.2	sense	3utr
chrIII	12622878	A	ND	NA	intergenic
chrIII	12715039	A	ssl-1	sense	intron
chrIII	12520481	A	Y111B2A.4	sense	intron
chrIII	12160038	A	ND	NA	intergenic
chrIII	12160039	A	ND	NA	intergenic
chrIII	12715048	A	ssl-1	sense	intron
chrIII	12461097	A	Y49E10.21	sense	intron
chrIII	12622890	A	ND	NA	intergenic
chrIII	12622910	A	ND	NA	intergenic
chrIII	12160044	A	ND	NA	intergenic
chrIII	6085678	A	wht-1	antisense	coding
chrIII	861237	A	exos-4.2	sense	3utr
chrIII	11938870	A	Y56A3A.7	antisense	intron
chrIII	11525176	A	Y66D12A.16	sense	intron
chrIII	12622905	A	ND	NA	intergenic
chrIII	3857466	A	brc-1	antisense	intron
chrIII	11047995	A	ND	NA	intergenic
chrIII	2929724	A	cdh-1	sense	coding
chrIII	12512317	A	Y111B2A.4	sense	intron
chrIII	12512318	A	Y111B2A.4	sense	intron
chrIII	13196353	A	gly-5	sense	intron
chrIII	12520515	A	Y111B2A.4	sense	intron
chrIII	12160069	A	ND	NA	intergenic
chrIII	12622921	A	ND	NA	intergenic
chrIII	9208913	A	ZC84.4	antisense	intron
chrIII	13196372	A	gly-5	sense	intron
chrIII	11293781	A	smc-3	sense	intron
chrIII	11293784	A	smc-3	sense	intron
chrIII	13203120	A	gly-5	sense	intron
chrIII	13522608	A	pod-1	antisense	intron
chrIII	12512094	A	Y111B2A.4	sense	intron
chrIII	11136101	A	ND	NA	intergenic
chrIII	1404008	A	ND	NA	intergenic
chrIII	12829801	A	Y37D8A.3	sense	intron
chrIII	1404023	A	ND	NA	intergenic
chrIII	1404024	A	ND	NA	intergenic
chrIII	12455043	A	scav-3	antisense	intron
chrIII	3832964	A	cyp-25A1	sense	intron
chrIII	1404043	A	ND	NA	intergenic
chrIII	4189326	A	R74.2	sense	intron
chrIII	861328	A	ND	NA	intergenic
chrIII	13255826	A	F56A8.9	sense	intron
chrIII	10333337	A	T07C4.11	antisense	intron
chrIII	9590639	A	C48B4.1	antisense	intron
chrIII	160933	A	ver-1	sense	intron
chrIII	160934	A	ver-1	sense	intron
chrIII	160935	A	ver-1	sense	intron
chrIII	160936	A	ver-1	sense	intron
chrIII	160942	A	ver-1	sense	intron
chrIII	12620976	A	Y111B2A.12	sense	intron
chrIII	160947	A	ver-1	sense	intron
chrIII	12611790	A	Y111B2A.12	sense	intron
chrIII	11128350	A	ND	NA	intergenic
chrIII	12520631	A	Y111B2A.4	sense	intron
chrIII	2327071	A	Y54F10BM.12	antisense	coding
chrIII	12512444	A	Y111B2A.4	sense	intron
chrIII	8135870	A	C14B9.2	sense	intron
chrIII	12512451	A	Y111B2A.4	sense	intron
chrIII	13258021	A	F56A8.3	sense	intron
chrIII	4619462	A	F10F2.2	antisense	coding
chrIII	1305807	A	fbxa-79	antisense	coding
chrIII	5733589	A	ND	NA	intergenic
chrIII	12903638	A	ND	NA	intergenic
chrIII	12903639	A	ND	NA	intergenic
chrIII	12520664	A	Y111B2A.4	sense	intron
[truncated: 5,702 more rows]

## Sheet: mixed non-repetitive sites
Chromosome name	Position in chromosome	Nucleotide changed	Gene name in region	Orientation of the gene	Position in gene
chrV	2646529	A	ND	NA	intergenic
chrV	2646530	A	ND	NA	intergenic
chrV	2646533	A	ND	NA	intergenic
chrV	992262	A	unc-34	sense	intron
chrV	18106888	A	ND	NA	intergenic
chrV	4689934	A	K03B4.1	sense	intron
chrV	9707239	A	xbx-6	sense	intron
chrV	20251152	A	mdt-17	antisense	intron
chrV	4627800	A	F54D11.2	sense	intron
chrV	2646547	A	ND	NA	intergenic
chrV	16544276	A	Y32B12B.2	sense	intron
chrV	16544277	A	Y32B12B.2	sense	intron
chrV	4627801	A	F54D11.2	sense	intron
chrV	2646552	A	ND	NA	intergenic
chrV	6418607	A	T05H4.10	antisense	intron
chrV	2646556	A	ND	NA	intergenic
chrV	16605189	A	Y32B12C.5	antisense	intron
chrV	20093986	A	sec-23	sense	intron
chrV	6421028	A	T05H4.10	antisense	intron
chrV	2646566	A	ND	NA	intergenic
chrV	9539623	A	C50F4.12	antisense	intron
chrV	19919007	A	Y60A3A.19	sense	intron
chrV	16369443	A	W08G11.3	sense	intron
chrV	20251184	A	mdt-17	antisense	intron
chrV	1177137	A	T21H3.1	sense	intron
chrV	16369205	A	W08G11.3	sense	intron
chrV	2195006	A	nhr-13	sense	intron
chrV	355903	A	atg-9	sense	intron
chrV	2646595	A	ND	NA	intergenic
chrV	2646600	A	ND	NA	intergenic
chrV	390220	A	ZK6.6	sense	intron
chrV	2646610	A	ND	NA	intergenic
chrV	6421075	A	T05H4.10	antisense	intron
chrV	686168	A	ND	NA	intergenic
chrV	686169	A	ND	NA	intergenic
chrV	390234	A	ZK6.6	sense	intron
chrV	686685	A	ND	NA	intergenic
chrV	16557271	A	Y32B12B.4	sense	intron
chrV	992613	A	unc-34	sense	intron
chrV	992352	A	unc-34	sense	intron
chrV	390242	A	ZK6.6	sense	intron
chrV	20251067	A	mdt-17	antisense	intron
chrV	6421094	A	T05H4.10	antisense	intron
chrV	6418627	A	T05H4.10	antisense	intron
chrV	4628072	A	F54D11.2	sense	intron
chrV	6421457	A	T05H4.10	antisense	intron
chrV	20251756	A	mdt-17	antisense	intron
chrV	20251757	A	mdt-17	antisense	intron
chrV	7380590	A	C03G6.17	antisense	intron
chrV	686191	A	ND	NA	intergenic
chrV	686192	A	ND	NA	intergenic
chrV	2195057	A	nhr-13	sense	intron
chrV	6421106	A	T05H4.10	antisense	intron
chrV	4627902	A	F54D11.2	sense	intron
chrV	18028646	A	Y59A8B.6	sense	intron
chrV	19919170	A	Y60A3A.19	sense	intron
chrV	19918970	A	Y60A3A.19	sense	intron
chrV	12931707	A	T16G1.2	sense	intron
chrV	18995839	A	Y39B6A.36	sense	intron
chrV	3895432	A	sre-9	sense	intron
chrV	19918985	A	Y60A3A.19	sense	intron
chrV	4207755	A	H43I07.1	sense	intron
chrV	4628108	A	F54D11.2	sense	intron
chrV	4628109	A	F54D11.2	sense	intron
chrV	2646673	A	ND	NA	intergenic
chrV	686738	A	ND	NA	intergenic
chrV	3895443	A	sre-9	sense	intron
chrV	18995861	A	Y39B6A.36	sense	intron
chrV	20251800	A	mdt-17	antisense	intron
chrV	11466908	A	aat-6	antisense	3utr
chrV	20251805	A	mdt-17	antisense	intron
chrV	20824550	A	gcy-22	antisense	intron
chrV	18028645	A	Y59A8B.6	sense	intron
chrV	16809072	A	cand-1	sense	intron
chrV	20251163	A	mdt-17	antisense	intron
chrV	925348	A	H24K24.2	sense	intron
chrV	2646726	A	ND	NA	intergenic
chrV	686573	A	ND	NA	intergenic
chrV	11821937	A	pyc-1	antisense	intron
chrV	924841	A	H24K24.2	sense	intron
chrV	6497962	A	W01A11.2	sense	intron
chrV	991403	A	unc-34	sense	intron
chrV	4628141	A	F54D11.2	sense	intron
chrV	4628143	A	F54D11.2	sense	intron
chrV	991411	A	unc-34	sense	intron
chrV	14552756	A	C53A5.13	sense	intron
chrV	3895480	A	sre-9	sense	intron
chrV	20346462	A	Y38H6A.3	sense	intron
chrV	924861	A	H24K24.2	sense	intron
chrV	20251765	A	mdt-17	antisense	intron
chrV	4628256	A	F54D11.2	sense	intron
chrV	4628163	A	F54D11.2	sense	intron
chrV	924870	A	H24K24.2	sense	intron
chrV	991431	A	unc-34	sense	intron
chrV	4628169	A	F54D11.2	sense	intron
chrV	6418634	A	T05H4.10	antisense	intron
chrV	991438	A	unc-34	sense	intron
chrV	16557806	A	Y32B12B.4	sense	intron
chrV	4628178	A	F54D11.2	sense	intron
chrV	6316243	A	T28C12.5	sense	coding
chrV	2646740	A	ND	NA	intergenic
chrV	2646741	A	ND	NA	intergenic
chrV	18417366	A	ND	NA	intergenic
chrV	4628183	A	F54D11.2	sense	intron
chrV	4628184	A	F54D11.2	sense	intron
chrV	4628188	A	F54D11.2	sense	intron
chrV	2646749	A	ND	NA	intergenic
chrV	2646750	A	ND	NA	intergenic
chrV	19196274	A	pph-5	sense	intron
chrV	1931488	A	ND	NA	intergenic
chrV	5948641	A	pst-1	sense	intron
chrV	16558321	A	Y32B12B.4	sense	intron
chrV	20251174	A	mdt-17	antisense	intron
chrV	16558310	A	Y32B12B.4	sense	intron
chrV	6418385	A	T05H4.10	antisense	intron
chrV	2646762	A	ND	NA	intergenic
chrV	2195182	A	nhr-13	sense	intron
chrV	10658031	A	ND	NA	intergenic
chrV	2646768	A	ND	NA	intergenic
chrV	4627697	A	F54D11.2	sense	intron
chrV	2646772	A	ND	NA	intergenic
chrV	4628214	A	F54D11.2	sense	intron
chrV	2646776	A	ND	NA	intergenic
chrV	4627709	A	F54D11.2	sense	intron
chrV	6418686	A	T05H4.10	antisense	intron
chrV	7347967	A	nhr-147	sense	coding
chrV	5082765	A	Y58A7A.4	antisense	coding
chrV	16558339	A	Y32B12B.4	sense	intron
chrV	1931526	A	ND	NA	intergenic
chrV	5479176	A	ND	NA	intergenic
chrV	5479177	A	ND	NA	intergenic
chrV	4628234	A	F54D11.2	sense	intron
chrV	4628235	A	F54D11.2	sense	intron
chrV	18417368	A	ND	NA	intergenic
chrV	3503890	A	ugt-64	antisense	intron
chrV	4628246	A	F54D11.2	sense	intron
chrV	2646808	A	ND	NA	intergenic
chrV	4627737	A	F54D11.2	sense	intron
chrV	2646812	A	ND	NA	intergenic
chrV	6418719	A	T05H4.10	antisense	intron
chrV	4207904	A	H43I07.1	sense	intron
chrV	2646817	A	ND	NA	intergenic
chrV	4628258	A	F54D11.2	sense	intron
chrV	4627768	A	F54D11.2	sense	intron
chrV	16369444	A	W08G11.3	sense	intron
chrV	19311397	A	ND	NA	intergenic
chrV	11964199	A	F58H1.7	antisense	intron
chrV	12758312	A	F18E2.1	antisense	intron
chrV	4628267	A	F54D11.2	sense	intron
chrV	4627756	A	F54D11.2	sense	intron
chrV	4627757	A	F54D11.2	sense	intron
chrV	18038062	A	Y59A8B.6	sense	intron
chrV	20346503	A	Y38H6A.3	sense	intron
chrV	10802992	A	secs-1	antisense	coding
chrV	20251784	A	mdt-17	antisense	intron
chrV	19917197	A	Y60A3A.19	sense	intron
chrV	2646836	A	ND	NA	intergenic
chrV	4628279	A	F54D11.2	sense	intron
chrV	356152	A	atg-9	sense	intron
chrV	686394	A	ND	NA	intergenic
chrV	16369467	A	W08G11.3	sense	intron
chrV	911164	A	H24K24.4	sense	intron
chrV	13450064	A	ND	NA	intergenic
chrV	6418571	A	T05H4.10	antisense	intron
chrV	6716230	A	W02F12.1	sense	3utr
chrV	911175	A	H24K24.4	sense	intron
chrV	1470792	A	tag-304	sense	intron
chrV	19917196	A	Y60A3A.19	sense	intron
chrV	20824484	A	gcy-22	antisense	intron
chrV	4207954	A	H43I07.1	sense	intron
chrV	4628303	A	F54D11.2	sense	3utr
chrV	4628304	A	F54D11.2	sense	3utr
chrV	911185	A	H24K24.4	sense	intron
chrV	2009426	A	F59A7.8	sense	intron
chrV	2646867	A	ND	NA	intergenic
chrV	44884	A	ND	NA	intergenic
chrV	2685270	A	kel-8	sense	intron
chrV	911192	A	H24K24.4	sense	intron
chrV	911193	A	H24K24.4	sense	intron
chrV	911194	A	H24K24.4	sense	intron
chrV	16557404	A	Y32B12B.4	sense	intron
chrV	996189	A	ND	NA	intergenic
chrV	996190	A	ND	NA	intergenic
chrV	6795365	A	ND	NA	intergenic
chrV	4627808	A	F54D11.2	sense	intron
chrV	2194786	A	nhr-13	sense	intron
chrV	996197	A	ND	NA	intergenic
chrV	18028689	A	Y59A8B.6	sense	intron
chrV	5226983	A	Y49G5B.1	sense	intron
chrV	9707373	A	xbx-6	sense	intron
chrV	4627824	A	F54D11.2	sense	intron
chrV	4627825	A	F54D11.2	sense	intron
chrV	4627826	A	F54D11.2	sense	intron
chrV	12182389	A	ZK863.4	antisense	intron
chrV	16543523	A	Y32B12B.2	sense	intron
chrV	20251511	A	mdt-17	antisense	intron
chrV	992632	A	unc-34	sense	intron
chrV	911226	A	H24K24.4	sense	intron
chrV	16544319	A	Y32B12B.2	sense	intron
chrV	20312317	A	clec-262	sense	intron
chrV	991615	A	unc-34	sense	intron
chrV	991616	A	unc-34	sense	intron
chrV	996227	A	ND	NA	intergenic
chrV	3749764	A	ND	NA	intergenic
chrV	3895179	A	sre-9	sense	intron
chrV	911244	A	H24K24.4	sense	intron
chrV	911246	A	H24K24.4	sense	intron
chrV	911247	A	H24K24.4	sense	intron
chrV	18662288	A	Y69H2.3	antisense	intron
chrV	4627857	A	F54D11.2	sense	intron
chrV	4627858	A	F54D11.2	sense	intron
chrV	5598275	A	ND	NA	intergenic
chrV	3895189	A	sre-9	sense	intron
chrV	20251033	A	mdt-17	antisense	intron
chrV	992664	A	unc-34	sense	intron
chrV	6418329	A	T05H4.10	antisense	intron
chrV	911258	A	H24K24.4	sense	intron
chrV	992667	A	unc-34	sense	intron
chrV	6418332	A	T05H4.10	antisense	intron
chrV	996253	A	ND	NA	intergenic
chrV	12057504	A	R07B7.2	antisense	intron
chrV	19917217	A	Y60A3A.19	sense	intron
chrV	14195618	A	ZC376.7	sense	intron
chrV	3749795	A	ND	NA	intergenic
chrV	3368868	A	C04E12.2	sense	intron
chrV	20824486	A	gcy-22	antisense	intron
chrV	6418673	A	T05H4.10	antisense	intron
chrV	17991592	A	Y59A8B.21	sense	intron
chrV	4627881	A	F54D11.2	sense	intron
chrV	991658	A	unc-34	sense	intron
chrV	991659	A	unc-34	sense	intron
chrV	9171372	A	B0222.9	antisense	intron
chrV	991661	A	unc-34	sense	intron
chrV	5948753	A	pst-1	sense	intron
chrV	14986671	A	F02D8.4	sense	intron
chrV	1973168	A	acs-3	sense	intron
chrV	4627784	A	F54D11.2	sense	intron
chrV	4627890	A	F54D11.2	sense	intron
chrV	20245427	A	psa-1	antisense	intron
chrV	911284	A	H24K24.4	sense	intron
chrV	13680565	A	ccz-1	sense	intron
chrV	7187864	A	F09G2.3	sense	intron
chrV	18028471	A	Y59A8B.6	sense	intron
chrV	2646456	A	ND	NA	intergenic
chrV	6309108	A	K12B6.8	antisense	intron
chrV	4627770	A	F54D11.2	sense	intron
chrV	18028476	A	Y59A8B.6	sense	intron
chrV	13450058	A	ND	NA	intergenic
chrV	911294	A	H24K24.4	sense	intron
chrV	911295	A	H24K24.4	sense	intron
chrV	20245441	A	psa-1	antisense	intron
chrV	4209093	A	ND	NA	intergenic
chrV	4627910	A	F54D11.2	sense	intron
chrV	4627911	A	F54D11.2	sense	intron
chrV	20251082	A	mdt-17	antisense	intron
chrV	20251087	A	mdt-17	antisense	intron
chrV	5050832	A	pqn-51	sense	intron
chrV	4627704	A	F54D11.2	sense	intron
chrV	4628134	A	F54D11.2	sense	intron
chrV	4627924	A	F54D11.2	sense	intron
chrV	4627925	A	F54D11.2	sense	intron
chrV	18996729	A	Y39B6A.36	sense	intron
chrV	2646488	A	ND	NA	intergenic
chrV	2646692	A	ND	NA	intergenic
chrV	4627930	A	F54D11.2	sense	intron
chrV	4178398	A	Y45G5AM.2	sense	intron
chrV	4178399	A	Y45G5AM.2	sense	intron
chrV	9786849	A	ND	NA	intergenic
chrV	2646498	A	ND	NA	intergenic
chrV	3895269	A	sre-9	sense	intron
chrV	3895270	A	sre-9	sense	intron
chrV	4628305	A	F54D11.2	sense	3utr
chrV	3895276	A	sre-9	sense	intron
chrV	390226	A	ZK6.6	sense	intron
chrV	6418685	A	T05H4.10	antisense	intron
chrV	3895280	A	sre-9	sense	intron
chrV	3895281	A	sre-9	sense	intron
chrV	20779315	A	ND	NA	intergenic
chrV	3895285	A	sre-9	sense	intron
chrV	16544169	A	Y32B12B.2	sense	intron
chrV	2646520	A	ND	NA	intergenic
chrV	992255	A	unc-34	sense	intron
chrII	13878784	A	ing-3	sense	intron
chrII	13475751	A	ND	NA	intergenic
chrII	643243	A	K07E8.7	antisense	intron
chrII	7573602	A	ND	NA	intergenic
chrII	5622279	A	C17G10.9	antisense	intron
chrII	5630472	A	ND	NA	intergenic
chrII	14066491	A	ND	NA	intergenic
chrII	12238858	A	ND	NA	intergenic
chrII	1056779	A	ND	NA	intergenic
chrII	1056780	A	ND	NA	intergenic
chrII	995853	A	ND	NA	intergenic
chrII	5630480	A	ND	NA	intergenic
chrII	13476369	A	ND	NA	intergenic
chrII	7573763	A	ND	NA	intergenic
chrII	4126740	A	rhgf-2	sense	intron
chrII	4126741	A	rhgf-2	sense	intron
chrII	14066469	A	ND	NA	intergenic
chrII	15217175	A	spsb-1	sense	intron
chrII	3351064	A	bath-29	sense	intron
chrII	12238363	A	ND	NA	intergenic
chrII	13878812	A	ing-3	sense	intron
chrII	1827869	A	math-41	sense	intron
chrII	14277468	A	Y54G11A.3	sense	intron
chrII	12238853	A	ND	NA	intergenic
chrII	995872	A	ND	NA	intergenic
chrII	15120984	A	arp-1	sense	intron
chrII	1864027	A	ND	NA	intergenic
chrII	4125733	A	rhgf-2	sense	intron
chrII	5630502	A	ND	NA	intergenic
chrII	8177703	A	T05C12.4	antisense	coding
chrII	5630471	A	ND	NA	intergenic
chrII	431708	A	C24H12.3	sense	3utr
chrII	432171	A	C24H12.3	sense	intron
chrII	432172	A	C24H12.3	sense	intron
chrII	7089074	A	ND	NA	intergenic
chrII	13418845	A	Y48E1C.1	sense	intron
chrII	15217160	A	spsb-1	sense	intron
chrII	8535602	A	ND	NA	intergenic
chrII	4126771	A	rhgf-2	sense	intron
chrII	7088990	A	ND	NA	intergenic
chrII	431674	A	C24H12.3	sense	intron
chrII	434749	A	C24H12.12	antisense	intron
chrII	11912254	A	ZK930.1	antisense	intron
chrII	4126785	A	rhgf-2	sense	intron
chrII	13452354	A	pqn-27	antisense	intron
chrII	8535619	A	ND	NA	intergenic
chrII	8460356	A	zyg-9	sense	intron
chrII	257094	A	ND	NA	intergenic
chrII	1864576	A	ND	NA	intergenic
chrII	14066442	A	ND	NA	intergenic
chrII	434871	A	C24H12.12	antisense	intron
chrII	995917	A	ND	NA	intergenic
chrII	6207566	A	C30B5.5	antisense	intron
chrII	4126136	A	rhgf-2	sense	intron
chrII	13475922	A	ND	NA	intergenic
chrII	5630549	A	ND	NA	intergenic
chrII	13452392	A	pqn-27	antisense	intron
chrII	14277211	A	Y54G11A.3	sense	intron
chrII	257116	A	ND	NA	intergenic
chrII	431709	A	C24H12.3	sense	3utr
chrII	13452385	A	pqn-27	antisense	intron
chrII	3903868	A	F53C3.3	sense	intron
chrII	4126819	A	rhgf-2	sense	intron
chrII	7121508	A	F10E7.11	antisense	5utr
chrII	3904203	A	F53C3.3	sense	intron
chrII	7038747	A	cin-4	sense	coding
chrII	8535593	A	ND	NA	intergenic
chrII	13452394	A	pqn-27	antisense	intron
chrII	12902759	A	clec-65	sense	intron
chrII	1814125	A	ND	NA	intergenic
chrII	1814126	A	ND	NA	intergenic
chrII	5057653	A	pho-12	antisense	intron
chrII	14066295	A	ND	NA	intergenic
chrII	4126840	A	rhgf-2	sense	intron
chrII	14277396	A	Y54G11A.3	sense	intron
chrII	3210877	A	ZC239.6	sense	3utr
chrII	3492992	A	ND	NA	intergenic
chrII	432769	A	ND	NA	intergenic
chrII	4126266	A	rhgf-2	sense	intron
chrII	4126342	A	rhgf-2	sense	intron
chrII	8534977	A	ND	NA	intergenic
chrII	5630747	A	ND	NA	intergenic
chrII	3210860	A	ZC239.6	sense	3utr
chrII	5622018	A	C17G10.9	antisense	intron
chrII	14171997	A	ND	NA	intergenic
chrII	3210861	A	ZC239.6	sense	3utr
chrII	13686040	A	Y48E1A.1	antisense	coding
chrII	433813	A	C24H12.12	antisense	coding
chrII	14066347	A	ND	NA	intergenic
chrII	996036	A	ND	NA	intergenic
chrII	995482	A	ND	NA	intergenic
chrII	7089007	A	ND	NA	intergenic
chrII	3493023	A	ND	NA	intergenic
chrII	226466	A	Y43H11AL.1	antisense	intron
chrII	226467	A	Y43H11AL.1	antisense	intron
chrII	15122335	A	arp-1	sense	intron
chrII	13875805	A	ND	NA	intergenic
chrII	226475	A	Y43H11AL.1	antisense	intron
chrII	995502	A	ND	NA	intergenic
chrII	12187315	A	Y57A10A.14	sense	intron
chrII	1827510	A	math-41	sense	intron
chrII	1828023	A	math-41	sense	intron
chrII	996024	A	ND	NA	intergenic
chrII	15122463	A	arp-1	sense	intron
chrII	14066549	A	ND	NA	intergenic
chrII	2775745	A	ND	NA	intergenic
chrII	1828036	A	math-41	sense	intron
chrII	996037	A	ND	NA	intergenic
chrII	1061574	A	ND	NA	intergenic
chrII	996039	A	ND	NA	intergenic
chrII	13475921	A	ND	NA	intergenic
chrII	7088874	A	ND	NA	intergenic
chrII	432843	A	ND	NA	intergenic
chrII	11295948	A	C47G2.7	antisense	5utr
chrII	11985186	A	ash-2	sense	intron
chrII	13452395	A	pqn-27	antisense	intron
chrII	8535250	A	ND	NA	intergenic
chrII	3086548	A	Y25C1A.5	sense	intron
chrII	13475790	A	ND	NA	intergenic
chrII	2224857	A	F54A3.5	antisense	intron
chrII	8535258	A	ND	NA	intergenic
chrII	996059	A	ND	NA	intergenic
chrII	4126269	A	rhgf-2	sense	intron
chrII	1061598	A	ND	NA	intergenic
chrII	13095499	A	ND	NA	intergenic
chrII	1827552	A	math-41	sense	intron
chrII	3210979	A	ZC239.6	sense	3utr
chrII	15121124	A	arp-1	sense	intron
chrII	1061606	A	ND	NA	intergenic
chrII	7088625	A	ND	NA	intergenic
chrII	14989863	A	Y53F4B.43	sense	intron
chrII	15217618	A	spsb-1	sense	intron
chrII	3492989	A	ND	NA	intergenic
chrII	3493105	A	ND	NA	intergenic
chrII	3493106	A	ND	NA	intergenic
chrII	12718902	A	tbc-17	sense	intron
chrII	15229045	A	ND	NA	intergenic
chrII	3493111	A	ND	NA	intergenic
chrII	13897071	A	mcd-1	sense	intron
chrII	5622009	A	C17G10.9	antisense	intron
chrII	5622010	A	C17G10.9	antisense	intron
chrII	14066105	A	ND	NA	intergenic
chrII	1828604	A	math-41	sense	intron
chrII	15217621	A	spsb-1	sense	intron
chrII	1828609	A	math-41	sense	intron
chrII	1828610	A	math-41	sense	intron
chrII	4125955	A	rhgf-2	sense	intron
chrII	6794500	A	T13C2.2	sense	intron
chrII	14065926	A	lem-2	sense	3utr
chrII	6794504	A	T13C2.2	sense	intron
chrII	3493129	A	ND	NA	intergenic
chrII	14066312	A	ND	NA	intergenic
chrII	11295789	A	C47G2.7	antisense	5utr
chrII	14066450	A	ND	NA	intergenic
chrII	12810004	A	Y46G5A.19	sense	intron
chrII	5630741	A	ND	NA	intergenic
chrII	62230	A	C23H3.2	sense	intron
chrII	5622040	A	C17G10.9	antisense	intron
chrII	1828633	A	math-41	sense	intron
chrII	995611	A	ND	NA	intergenic
chrII	1864476	A	ND	NA	intergenic
chrII	4125879	A	rhgf-2	sense	intron
chrII	14066425	A	ND	NA	intergenic
chrII	12282145	A	ife-5	sense	intron
chrII	1828642	A	math-41	sense	intron
chrII	1828643	A	math-41	sense	intron
chrII	12282148	A	ife-5	sense	intron
chrII	99621	A	ND	NA	intergenic
chrII	4125991	A	rhgf-2	sense	intron
chrII	14066055	A	lem-2	sense	3utr
chrII	12281138	A	ife-5	sense	intron
chrII	14065966	A	lem-2	sense	3utr
chrII	995720	A	ND	NA	intergenic
chrII	14776622	A	Y54E2A.4	sense	intron
chrII	4051253	A	ND	NA	intergenic
chrII	3567414	A	ND	NA	intergenic
chrII	14065977	A	lem-2	sense	3utr
chrII	14066490	A	ND	NA	intergenic
chrII	12238815	A	ND	NA	intergenic
chrII	4051274	A	ND	NA	intergenic
chrII	4459744	A	T12C9.7	antisense	intron
chrII	995653	A	ND	NA	intergenic
chrII	5622087	A	C17G10.9	antisense	intron
chrII	10256200	A	F54B3.1	sense	intron
chrII	1828169	A	math-41	sense	intron
chrII	1828170	A	math-41	sense	intron
chrII	435019	A	C24H12.12	antisense	intron
chrII	3374413	A	ND	NA	intergenic
chrII	995662	A	ND	NA	intergenic
chrII	14066000	A	lem-2	sense	3utr
chrII	14066054	A	lem-2	sense	3utr
chrII	7088803	A	ND	NA	intergenic
chrII	1864021	A	ND	NA	intergenic
chrII	4126039	A	rhgf-2	sense	intron
chrII	4126040	A	rhgf-2	sense	intron
chrII	12902746	A	clec-65	sense	intron
chrII	432475	A	C24H12.3	sense	3utr
chrII	435036	A	C24H12.12	antisense	intron
chrII	1827898	A	math-41	sense	intron
chrII	1828190	A	math-41	sense	intron
chrII	14066016	A	lem-2	sense	3utr
chrII	4126137	A	rhgf-2	sense	intron
chrII	434859	A	C24H12.12	antisense	intron
chrII	99683	A	ND	NA	intergenic
chrII	14066533	A	ND	NA	intergenic
chrII	12281191	A	ife-5	sense	intron
chrII	4126573	A	rhgf-2	sense	intron
chrII	4126574	A	rhgf-2	sense	intron
chrII	1827901	A	math-41	sense	intron
chrII	1828208	A	math-41	sense	intron
chrII	14066134	A	ND	NA	intergenic
chrII	13417504	A	Y48E1C.1	sense	intron
chrII	13897054	A	mcd-1	sense	intron
chrII	13475902	A	ND	NA	intergenic
chrII	433532	A	ND	NA	intergenic
chrII	3903869	A	F53C3.3	sense	intron
chrII	13476222	A	ND	NA	intergenic
chrII	4327807	A	pfd-2	sense	intron
chrII	995712	A	ND	NA	intergenic
chrII	15217537	A	spsb-1	sense	intron
chrII	434052	A	C24H12.12	antisense	intron
chrII	14066053	A	lem-2	sense	3utr
chrII	10530694	A	mab-10	sense	intron
chrII	11769735	A	F44E5.2	sense	intron
chrII	433544	A	ND	NA	intergenic
chrII	434057	A	C24H12.12	antisense	intron
chrII	15122315	A	arp-1	sense	intron
chrII	11769740	A	F44E5.2	sense	intron
chrII	3211243	A	ZC239.6	sense	3utr
chrII	995728	A	ND	NA	intergenic
chrII	13875812	A	ND	NA	intergenic
chrII	15217544	A	spsb-1	sense	intron
chrII	2140563	A	ND	NA	intergenic
chrII	3903892	A	F53C3.3	sense	intron
chrII	3210905	A	ZC239.6	sense	3utr
chrII	1828248	A	math-41	sense	intron
chrII	3028889	A	ND	NA	intergenic
chrII	1864603	A	ND	NA	intergenic
chrII	1864005	A	ND	NA	intergenic
chrII	7354785	A	haf-2	antisense	intron
chrII	3211163	A	ZC239.6	sense	3utr
chrII	7078821	A	T02G5.11	antisense	coding
chrII	453543	A	ND	NA	intergenic
chrII	453544	A	ND	NA	intergenic
chrII	12707243	A	tbc-17	sense	intron
chrII	13476357	A	ND	NA	intergenic
chrII	7089069	A	ND	NA	intergenic
chrII	1073074	A	K02E7.4	sense	intron
chrII	12809971	A	Y46G5A.19	sense	intron
chrII	13476221	A	ND	NA	intergenic
chrII	14066426	A	ND	NA	intergenic
chrII	8535584	A	ND	NA	intergenic
chrII	1864120	A	ND	NA	intergenic
chrII	3211193	A	ZC239.6	sense	3utr
chrII	13476187	A	ND	NA	intergenic
chrII	1056699	A	ND	NA	intergenic
chrII	1056700	A	ND	NA	intergenic
chrII	1864125	A	ND	NA	intergenic
chrII	432062	A	C24H12.3	sense	intron
chrII	7013311	A	C52E12.4	antisense	coding
chrII	1827777	A	math-41	sense	intron
chrII	1827778	A	math-41	sense	intron
chrII	1827915	A	math-41	sense	intron
chrII	12281093	A	ife-5	sense	intron
chrII	3211205	A	ZC239.6	sense	3utr
chrII	8534983	A	ND	NA	intergenic
chrII	7088587	A	ND	NA	intergenic
chrII	432078	A	C24H12.3	sense	intron
chrII	14277072	A	Y54G11A.3	sense	intron
chrII	7093713	A	ND	NA	intergenic
chrII	3800018	A	Y8A9A.2	sense	intron
chrII	4126675	A	rhgf-2	sense	intron
chrII	15122388	A	arp-1	sense	intron
chrII	1622485	A	fbxa-159	antisense	intron
chrII	1622486	A	fbxa-159	antisense	intron
chrII	7573753	A	ND	NA	intergenic
chrII	6083663	A	ptc-2	antisense	coding
chrII	5622285	A	C17G10.9	antisense	intron
chrII	9044218	A	T24B8.7	antisense	intron
chrII	1056735	A	ND	NA	intergenic
chrII	4126800	A	rhgf-2	sense	intron
chrII	1867234	A	math-15	sense	intron
chrII	14066005	A	lem-2	sense	3utr
chrII	995815	A	ND	NA	intergenic
chrII	5813224	A	ZK1248.7	antisense	coding
chrII	995819	A	ND	NA	intergenic
chrII	433647	A	ND	NA	intergenic
chrII	7088624	A	ND	NA	intergenic
chrII	4126632	A	rhgf-2	sense	intron
chrII	1827317	A	math-41	sense	intron
chrII	13476189	A	ND	NA	intergenic
chrII	12281180	A	ife-5	sense	intron
chrII	14277114	A	Y54G11A.3	sense	intron
chrII	5319164	A	ND	NA	intergenic
chrII	13878783	A	ing-3	sense	intron
chrX	11340293	A	aco-1	sense	intron
chrX	172046	A	ND	NA	intergenic
chrX	5633553	A	T22B7.8	sense	intron
chrX	5633559	A	T22B7.8	sense	intron
chrX	14969880	A	F20D1.1	antisense	intron
chrX	16235546	A	F23A7.5	sense	intron
chrX	15945245	A	mec-5	sense	intron
chrX	14850089	A	tag-324	sense	intron
chrX	9908267	A	ND	NA	intergenic
chrX	15945261	A	mec-5	sense	intron
chrX	14317615	A	prx-1	sense	intron
chrX	11441718	A	ND	NA	intergenic
chrX	15945272	A	mec-5	sense	intron
chrX	2545222	A	F52H2.4	antisense	intron
chrX	7021641	A	cah-5	sense	intron
chrX	11441743	A	ND	NA	intergenic
chrX	9908304	A	ND	NA	intergenic
chrX	2170979	A	F48B9.2	sense	intron
chrX	57446	A	Y73B3A.18	sense	intron
chrX	16903672	A	F39F10.4	antisense	intron
chrX	54922	A	Y73B3A.18	sense	intron
chrX	54923	A	Y73B3A.18	sense	intron
chrX	54926	A	Y73B3A.18	sense	intron
chrX	11441818	A	ND	NA	intergenic
chrX	2030749	A	Y102A11A.2	sense	intron
chrX	1805475	A	ND	NA	intergenic
chrX	11441843	A	ND	NA	intergenic
chrX	3257537	A	lbp-3	sense	intron
chrX	3173580	A	klp-4	antisense	intron
chrX	12879571	A	bcat-1	sense	intron
chrX	57557	A	Y73B3A.18	sense	intron
chrX	4337366	A	ND	NA	intergenic
chrX	13336279	A	F46G10.4	sense	3utr
chrX	13336280	A	F46G10.4	sense	3utr
chrX	16903391	A	F39F10.4	antisense	intron
chrX	13336292	A	F46G10.4	sense	3utr
chrX	6519013	A	ND	NA	intergenic
chrX	57579	A	Y73B3A.18	sense	intron
chrX	13336306	A	F46G10.4	sense	3utr
chrX	13336307	A	F46G10.4	sense	3utr
chrX	15837941	A	F59F4.1	antisense	intron
chrX	11443967	A	ND	NA	intergenic
chrX	13410562	A	ND	NA	intergenic
chrX	57604	A	Y73B3A.18	sense	intron
chrX	8179465	A	C17H11.1	sense	intron
chrX	11441418	A	ND	NA	intergenic
chrX	3408668	A	unc-78	antisense	3utr
chrX	13336370	A	F46G10.4	sense	3utr
chrX	9908019	A	ND	NA	intergenic
chrX	13410614	A	ND	NA	intergenic
chrX	13336384	A	F46G10.4	sense	3utr
chrX	13410626	A	ND	NA	intergenic
chrX	154955	A	Y73B3A.10	antisense	3utr
chrX	15246156	A	piki-1	antisense	intron
chrX	8293714	A	F13B9.1	sense	intron
chrX	14177621	A	C37E2.2	sense	intron
chrX	10793834	A	T05A10.6	antisense	intron
chrX	6383985	A	igcm-2	antisense	intron
chrX	16054644	A	ND	NA	intergenic
chrX	210301	A	Y73B3B.1	antisense	coding
chrX	7021974	A	cah-5	sense	intron
chrX	57228	A	Y73B3A.18	sense	intron
chrX	11444117	A	ND	NA	intergenic
chrX	11444118	A	ND	NA	intergenic
chrX	9908633	A	ND	NA	intergenic
chrX	8073632	A	ND	NA	intergenic
chrX	1011618	A	rncs-1	sense	3utr
chrX	16510886	A	ND	NA	intergenic
chrX	8901031	A	ND	NA	intergenic
chrX	9908140	A	ND	NA	intergenic
chrX	11444142	A	ND	NA	intergenic
chrX	57266	A	Y73B3A.18	sense	intron
chrX	4960691	A	act-4	sense	intron
chrX	8073659	A	ND	NA	intergenic
chrX	16223683	A	ND	NA	intergenic
chrX	11441093	A	ND	NA	intergenic
chrX	13691336	A	adm-2	sense	intron
chrX	7022029	A	cah-5	sense	intron
chrX	16223696	A	ND	NA	intergenic
chrX	1011665	A	rncs-1	sense	3utr
chrX	11442643	A	ND	NA	intergenic
chrX	6407130	A	ND	NA	intergenic
chrX	57308	A	Y73B3A.18	sense	intron
chrX	11441118	A	ND	NA	intergenic
chrX	13473761	A	tre-4	sense	intron
chrX	1011685	A	rncs-1	sense	3utr
chrX	4434407	A	F15A8.6	antisense	intron
chrX	13336553	A	F46G10.4	sense	3utr
chrX	57322	A	Y73B3A.18	sense	intron
chrX	1141742	A	R193.2	antisense	intron
chrX	57335	A	Y73B3A.18	sense	intron
chrX	57336	A	Y73B3A.18	sense	intron
chrX	15945211	A	mec-5	sense	intron
chrIII	9551873	A	unc-16	sense	intron
chrIII	13203463	A	gly-5	sense	intron
chrIII	13203468	A	gly-5	sense	intron
chrIII	13350930	A	mtm-6	sense	intron
chrIII	200733	A	F40G9.17	sense	intron
chrIII	13203120	A	gly-5	sense	intron
chrIII	12697634	A	ND	NA	intergenic
chrIII	11153454	A	Y47D3A.29	sense	intron
chrIII	11153455	A	Y47D3A.29	sense	intron
chrIII	6197297	A	C23G10.7	antisense	intron
chrIII	12466226	A	ND	NA	intergenic
chrIII	200757	A	F40G9.17	sense	intron
chrIII	578228	A	hel-308	antisense	intron
chrIII	12466236	A	ND	NA	intergenic
chrIII	1462338	A	Y82E9BR.1	sense	intron
chrIII	12697669	A	ND	NA	intergenic
chrIII	13203528	A	gly-5	sense	intron
chrIII	200780	A	F40G9.17	sense	intron
chrIII	12466253	A	ND	NA	intergenic
chrIII	12466260	A	ND	NA	intergenic
chrIII	200789	A	F40G9.17	sense	intron
chrIII	2707542	A	ND	NA	intergenic
chrIII	2707543	A	ND	NA	intergenic
chrIII	12502031	A	Y111B2A.4	sense	intron
chrIII	3514463	A	hmit-1.3	antisense	intron
chrIII	12697697	A	ND	NA	intergenic
chrIII	12466274	A	ND	NA	intergenic
chrIII	12731067	A	ssl-1	sense	intron
chrIII	12466276	A	ND	NA	intergenic
chrIII	9513065	A	ND	NA	intergenic
chrIII	9513068	A	ND	NA	intergenic
chrIII	1568879	A	Y67D2.2	sense	intron
chrIII	1568881	A	Y67D2.2	sense	intron
chrIII	2707570	A	ND	NA	intergenic
chrIII	12461075	A	Y49E10.21	sense	intron
chrIII	2582644	A	ND	NA	intergenic
chrIII	2707573	A	ND	NA	intergenic
chrIII	1568895	A	Y67D2.2	sense	intron
chrIII	13508749	A	ND	NA	intergenic
chrIII	182423	A	F40G9.15	sense	intron
chrIII	9183389	A	tax-4	sense	intron
chrIII	13199523	A	gly-5	sense	intron
chrIII	2582692	A	ND	NA	intergenic
chrIII	12521642	A	Y111B2A.4	sense	intron
chrIII	12521643	A	Y111B2A.4	sense	intron
chrIII	11047112	A	ND	NA	intergenic
chrIII	11150333	A	Y47D3A.29	sense	intron
chrIII	12742863	A	ssl-1	sense	intron
chrIII	182482	A	F40G9.15	sense	intron
chrIII	182483	A	F40G9.15	sense	intron
chrIII	13512917	A	mlh-1	antisense	intron
chrIII	182487	A	F40G9.15	sense	intron
chrIII	182488	A	F40G9.15	sense	intron
chrIII	1439963	A	Y82E9BR.2	sense	intron
chrIII	9552097	A	unc-16	sense	intron
chrIII	13199589	A	gly-5	sense	intron
chrIII	6889710	A	ND	NA	intergenic
chrIII	7598324	A	ND	NA	intergenic
chrIII	12742907	A	ssl-1	sense	intron
chrIII	7598360	A	ND	NA	intergenic
chrIII	12466223	A	ND	NA	intergenic
chrIII	266527	A	Y50D7A.11	sense	coding
chrIII	1462576	A	Y82E9BR.1	sense	intron
chrIII	1462588	A	Y82E9BR.1	sense	intron
chrIII	201032	A	F40G9.17	sense	intron
chrIII	13201748	A	gly-5	sense	intron
chrIII	1462615	A	Y82E9BR.1	sense	intron
chrIII	13201754	A	gly-5	sense	intron
chrIII	12623247	A	ND	NA	intergenic
chrIII	11067755	A	rsa-2	sense	intron
chrIII	11510129	A	Y66D12A.19	sense	intron
chrIII	5460348	A	ND	NA	intergenic
chrIII	4866436	A	coq-8	sense	intron
chrIII	5460358	A	ND	NA	intergenic
chrIII	1568834	A	Y67D2.2	sense	intron
chrIII	12460446	A	Y49E10.21	sense	intron
chrIII	13199770	A	gly-5	sense	intron
chrIII	5460382	A	ND	NA	intergenic
chrIII	12698018	A	ND	NA	intergenic
chrIII	5460387	A	ND	NA	intergenic
chrIII	12698021	A	ND	NA	intergenic
chrIII	12698025	A	ND	NA	intergenic
chrIII	13259181	A	F56A8.3	sense	intron
chrIII	5460401	A	ND	NA	intergenic
chrIII	12511669	A	Y111B2A.4	sense	intron
chrIII	10014111	A	ND	NA	intergenic
chrIII	12698053	A	ND	NA	intergenic
chrIII	1462726	A	Y82E9BR.1	sense	intron
chrIII	1462727	A	Y82E9BR.1	sense	intron
chrIII	8755276	A	sma-2	sense	intron
chrIII	12744278	A	ND	NA	intergenic
chrIII	5460431	A	ND	NA	intergenic
chrIII	12743129	A	ssl-1	sense	intron
chrIII	12698078	A	ND	NA	intergenic
chrIII	12743139	A	ssl-1	sense	intron
chrIII	12698090	A	ND	NA	intergenic
chrIII	13199855	A	gly-5	sense	intron
chrIII	850421	A	ND	NA	intergenic
chrIII	12730870	A	ssl-1	sense	intron
chrIII	12730871	A	ssl-1	sense	intron
chrIII	12743166	A	ssl-1	sense	intron
chrIII	13201925	A	gly-5	sense	intron
chrIII	850447	A	ND	NA	intergenic
chrIII	1408088	A	Y82E9BR.22	antisense	intron
chrIII	12460592	A	Y49E10.21	sense	intron
chrIII	12732979	A	ssl-1	sense	intron
chrIII	12732980	A	ssl-1	sense	intron
chrIII	12247607	A	tim-1	antisense	intron
chrIII	12460603	A	Y49E10.21	sense	intron
chrIII	12730945	A	ssl-1	sense	intron
chrIII	12697698	A	ND	NA	intergenic
chrIII	12612174	A	Y111B2A.12	sense	intron
chrIII	12612179	A	Y111B2A.12	sense	intron
chrIII	6728286	A	Y102E9.5	antisense	intron
chrIII	2582289	A	ND	NA	intergenic
chrIII	12743278	A	ssl-1	sense	intron
chrIII	12159599	A	ND	NA	intergenic
chrIII	12159601	A	ND	NA	intergenic
chrIII	12159603	A	ND	NA	intergenic
chrIII	6701688	A	rbf-1	sense	intron
chrIII	12159610	A	ND	NA	intergenic
chrIII	4432509	A	C28A5.1	antisense	intron
chrIII	12159617	A	ND	NA	intergenic
chrIII	2582294	A	ND	NA	intergenic
chrIII	6701704	A	rbf-1	sense	intron
chrIII	12061340	A	ND	NA	intergenic
chrIII	12698054	A	ND	NA	intergenic
chrIII	2707569	A	ND	NA	intergenic
chrIII	4242088	A	F43C1.7	antisense	intron
chrIII	8223404	A	C30A5.4	sense	coding
chrIII	11803316	A	ND	NA	intergenic
chrIII	12698057	A	ND	NA	intergenic
chrIII	3131508	A	ND	NA	intergenic
chrIII	12159675	A	ND	NA	intergenic
chrIII	13203573	A	gly-5	sense	intron
chrIII	5460679	A	ND	NA	intergenic
chrIII	12710600	A	ND	NA	intergenic
chrIII	12712649	A	hut-1	sense	intron
chrIII	12710602	A	ND	NA	intergenic
chrIII	12159698	A	ND	NA	intergenic
chrIII	13290196	A	set-25	antisense	intron
chrIII	12159702	A	ND	NA	intergenic
chrIII	12159704	A	ND	NA	intergenic
chrIII	9505498	A	lrg-1	sense	3utr
chrIII	12159708	A	ND	NA	intergenic
chrIII	12710622	A	ND	NA	intergenic
chrIII	9505504	A	lrg-1	sense	3utr
chrIII	5460705	A	ND	NA	intergenic
chrIII	12731111	A	ssl-1	sense	intron
chrIII	5460719	A	ND	NA	intergenic
chrIII	12159728	A	ND	NA	intergenic
chrIII	12159733	A	ND	NA	intergenic
chrIII	12159735	A	ND	NA	intergenic
chrIII	12159740	A	ND	NA	intergenic
chrIII	11389697	A	nlp-21	antisense	intron
chrIII	12610310	A	Y111B2A.12	sense	intron
chrIII	12710664	A	ND	NA	intergenic
chrIII	12710665	A	ND	NA	intergenic
chrIII	12710671	A	ND	NA	intergenic
chrIII	11182875	A	tra-1	antisense	intron
chrIII	1574704	A	rep-1	sense	intron
chrIII	12610350	A	Y111B2A.12	sense	intron
chrIII	5460805	A	ND	NA	intergenic
chrIII	1575757	A	rep-1	sense	intron
chrIII	5460815	A	ND	NA	intergenic
chrIII	5460816	A	ND	NA	intergenic
chrIII	1575766	A	rep-1	sense	intron
chrIII	5460827	A	ND	NA	intergenic
chrIII	5460830	A	ND	NA	intergenic
chrIII	10935142	A	M142.8	sense	intron
chrIII	12610418	A	Y111B2A.12	sense	intron
chrIII	12610419	A	Y111B2A.12	sense	intron
chrIII	12731253	A	ssl-1	sense	intron
chrIII	12610425	A	Y111B2A.12	sense	intron
chrIII	5460860	A	ND	NA	intergenic
chrIII	5460863	A	ND	NA	intergenic
chrIII	5460864	A	ND	NA	intergenic
chrIII	10681222	A	Y39A1A.16	sense	intron
chrIII	181128	A	ND	NA	intergenic
chrIII	5460884	A	ND	NA	intergenic
chrIII	7857047	A	tag-307	antisense	intron
chrIII	5460895	A	ND	NA	intergenic
chrIII	5460899	A	ND	NA	intergenic
chrIII	5460901	A	ND	NA	intergenic
chrIII	5460910	A	ND	NA	intergenic
chrIII	4199343	A	asd-1	sense	intron
chrIII	1278899	A	ZC47.8	antisense	intron
chrIII	3724215	A	C14B1.12	antisense	3utr
chrIII	12731323	A	ssl-1	sense	intron
chrIII	5460934	A	ND	NA	intergenic
chrIII	12622792	A	ND	NA	intergenic
chrIII	12700622	A	Y111B2A.24	sense	intron
chrIII	12159957	A	ND	NA	intergenic
chrIII	12622807	A	ND	NA	intergenic
chrIII	1403865	A	ND	NA	intergenic
chrIII	12622817	A	ND	NA	intergenic
chrIII	13202939	A	gly-5	sense	intron
chrIII	12622821	A	ND	NA	intergenic
chrIII	12159979	A	ND	NA	intergenic
chrIII	11150316	A	Y47D3A.29	sense	intron
chrIII	12622830	A	ND	NA	intergenic
chrIII	13257715	A	F56A8.3	sense	intron
chrIII	12744190	A	ND	NA	intergenic
chrIII	12622844	A	ND	NA	intergenic
chrIII	10475690	A	ND	NA	intergenic
chrIII	12160002	A	ND	NA	intergenic
chrIII	10475691	A	ND	NA	intergenic
chrIII	12710916	A	ND	NA	intergenic
chrIII	12710918	A	ND	NA	intergenic
chrIII	12622856	A	ND	NA	intergenic
chrIII	1580044	A	Y22D7AL.7	sense	intron
chrIII	1877506	A	ND	NA	intergenic
chrIII	861199	A	exos-4.2	sense	3utr
chrIII	1877507	A	ND	NA	intergenic
chrIII	12160026	A	ND	NA	intergenic
chrIII	11150363	A	Y47D3A.29	sense	intron
chrIII	861212	A	exos-4.2	sense	3utr
chrIII	12622878	A	ND	NA	intergenic
chrIII	12520481	A	Y111B2A.4	sense	intron
chrIII	12461091	A	Y49E10.21	sense	intron
chrIII	12160038	A	ND	NA	intergenic
chrIII	12622889	A	ND	NA	intergenic
chrIII	12622890	A	ND	NA	intergenic
chrIII	12160053	A	ND	NA	intergenic
chrIII	12160054	A	ND	NA	intergenic
chrIII	12622904	A	ND	NA	intergenic
chrIII	12622905	A	ND	NA	intergenic
chrIII	12622910	A	ND	NA	intergenic
chrIII	12622921	A	ND	NA	intergenic
chrIII	12160084	A	ND	NA	intergenic
chrIII	11293784	A	smc-3	sense	intron
chrIII	181360	A	ND	NA	intergenic
chrIII	12520567	A	Y111B2A.4	sense	intron
chrIII	181375	A	ND	NA	intergenic
chrIII	3832964	A	cyp-25A1	sense	intron
chrIII	181385	A	ND	NA	intergenic
chrIII	3697824	A	cyn-9	antisense	3utr
chrIII	5460850	A	ND	NA	intergenic
chrIII	160942	A	ver-1	sense	intron
chrIII	11304118	A	smc-3	sense	intron
chrIII	12520631	A	Y111B2A.4	sense	intron
chrIII	181463	A	ND	NA	intergenic
chrIII	13282546	A	unc-64	sense	intron
chrIII	12623097	A	ND	NA	intergenic
chrIII	12623098	A	ND	NA	intergenic
chrIII	12623135	A	ND	NA	intergenic
chrIII	12623144	A	ND	NA	intergenic
chrIII	12623146	A	ND	NA	intergenic
chrIII	12623147	A	ND	NA	intergenic
chrIII	12743986	A	ND	NA	intergenic
chrIII	12279092	A	Y75B8A.25	sense	intron
chrIII	11136310	A	ND	NA	intergenic
chrIII	12743991	A	ND	NA	intergenic
chrIII	13258040	A	F56A8.3	sense	intron
chrIII	12623162	A	ND	NA	intergenic
chrIII	12623163	A	ND	NA	intergenic
chrIII	12743997	A	ND	NA	intergenic
chrIII	12623168	A	ND	NA	intergenic
chrIII	320842	A	Y50D7A.10	sense	intron
chrIII	12623191	A	ND	NA	intergenic
chrIII	12744026	A	ND	NA	intergenic
chrIII	12744029	A	ND	NA	intergenic
chrIII	12672352	A	taf-7.2	antisense	intron
chrIII	12744036	A	ND	NA	intergenic
chrIII	861541	A	ND	NA	intergenic
chrIII	12623208	A	ND	NA	intergenic
chrIII	861546	A	ND	NA	intergenic
chrIII	12672367	A	taf-7.2	antisense	intron
chrIII	13198707	A	gly-5	sense	intron
chrIII	13198708	A	gly-5	sense	intron
chrIII	12672378	A	taf-7.2	antisense	intron
chrIII	12623236	A	ND	NA	intergenic
chrIII	7603589	A	ND	NA	intergenic
chrIII	7603590	A	ND	NA	intergenic
chrIII	861578	A	ND	NA	intergenic
chrIII	861579	A	ND	NA	intergenic
chrIII	12744078	A	ND	NA	intergenic
chrIII	861583	A	ND	NA	intergenic
chrIII	12744089	A	ND	NA	intergenic
chrIII	7603611	A	ND	NA	intergenic
chrIII	12623262	A	ND	NA	intergenic
chrIII	1877573	A	ND	NA	intergenic
chrIII	4050340	A	E03A3.10	sense	intron
chrIII	13202853	A	gly-5	sense	intron
chrIII	13202860	A	gly-5	sense	intron
chrIII	12623285	A	ND	NA	intergenic
chrIII	2035129	A	dpy-1	antisense	intron
chrIII	12623297	A	ND	NA	intergenic
chrIII	12623300	A	ND	NA	intergenic
chrIII	12511151	A	Y111B2A.4	sense	intron
chrIII	12735951	A	ssl-1	sense	intron
chrIII	12623331	A	ND	NA	intergenic
chrIII	13198826	A	gly-5	sense	intron
chrIII	12623341	A	ND	NA	intergenic
chrIII	861679	A	ND	NA	intergenic
chrIII	12744177	A	ND	NA	intergenic
chrIII	12744181	A	ND	NA	intergenic
chrIII	13202938	A	gly-5	sense	intron
chrIII	12744187	A	ND	NA	intergenic
chrIII	12744188	A	ND	NA	intergenic
chrIII	12295678	A	mrp-8	antisense	intron
chrIII	861698	A	ND	NA	intergenic
chrIII	861699	A	ND	NA	intergenic
chrIII	11128324	A	ND	NA	intergenic
chrIII	5459461	A	F48E8.4	sense	3utr
chrIII	5459462	A	F48E8.4	sense	3utr
chrIII	1877511	A	ND	NA	intergenic
chrIII	12744207	A	ND	NA	intergenic
chrIII	13198871	A	gly-5	sense	intron
chrIII	200623	A	F40G9.17	sense	intron
chrIII	861730	A	ND	NA	intergenic
chrIII	12744229	A	ND	NA	intergenic
chrIII	12744230	A	ND	NA	intergenic
chrIII	861737	A	ND	NA	intergenic
chrIII	12744235	A	ND	NA	intergenic
chrIII	861742	A	ND	NA	intergenic
chrIII	5459503	A	F48E8.4	sense	3utr
chrIII	861744	A	ND	NA	intergenic
chrIII	12744241	A	ND	NA	intergenic
chrIII	12744244	A	ND	NA	intergenic
chrIII	861749	A	ND	NA	intergenic
chrIII	5459514	A	F48E8.4	sense	3utr
chrIII	5459516	A	F48E8.4	sense	3utr
chrIII	861758	A	ND	NA	intergenic
chrIII	861761	A	ND	NA	intergenic
chrIII	1574466	A	rep-1	sense	intron
chrIII	7355973	A	F08F8.10	antisense	intron
chrIII	12224077	A	ND	NA	intergenic
chrIII	5459535	A	F48E8.4	sense	3utr
chrIII	12451410	A	ani-1	antisense	intron
chrIII	12224083	A	ND	NA	intergenic
chrIII	5460887	A	ND	NA	intergenic
chrIII	5459542	A	F48E8.4	sense	3utr
chrIII	5459546	A	F48E8.4	sense	3utr
chrIII	5459547	A	F48E8.4	sense	3utr
chrIII	11046492	A	ND	NA	intergenic
chrIII	200634	A	F40G9.17	sense	intron
chrIII	5459550	A	F48E8.4	sense	3utr
chrIII	1574497	A	rep-1	sense	intron
chrIII	5459556	A	F48E8.4	sense	3utr
chrIII	5459559	A	F48E8.4	sense	3utr
chrIII	5459561	A	F48E8.4	sense	3utr
chrIII	3182192	A	R148.3	sense	intron
chrIII	3182193	A	R148.3	sense	intron
chrIII	1457782	A	ND	NA	intergenic
chrIII	5459576	A	F48E8.4	sense	3utr
chrIII	12451449	A	ani-1	antisense	intron
chrIII	3182205	A	R148.3	sense	intron
chrIII	5459583	A	F48E8.4	sense	3utr
chrIII	1144449	A	smr-1	sense	intron
chrIII	1144450	A	smr-1	sense	intron
chrIII	13199524	A	gly-5	sense	intron
chrIII	13508546	A	ND	NA	intergenic
chrIII	1574543	A	rep-1	sense	intron
chrIII	12170899	A	ND	NA	intergenic
chrIII	1574548	A	rep-1	sense	intron
chrIII	200345	A	F40G9.17	sense	intron
chrIII	5459612	A	F48E8.4	sense	3utr
chrIII	13282974	A	unc-64	sense	intron
chrIII	5459615	A	F48E8.4	sense	3utr
chrIII	200352	A	F40G9.17	sense	intron
chrIII	1574562	A	rep-1	sense	intron
chrIII	1574563	A	rep-1	sense	intron
chrIII	200356	A	F40G9.17	sense	intron
chrIII	200358	A	F40G9.17	sense	intron
chrIII	13282985	A	unc-64	sense	intron
chrIII	5459629	A	F48E8.4	sense	3utr
chrIII	200368	A	F40G9.17	sense	intron
chrIII	12534387	A	Y111B2A.25	sense	intron
chrIII	13522616	A	pod-1	antisense	intron
chrIII	13522622	A	pod-1	antisense	intron
chrIII	3088063	A	sft-1	sense	intron
chrIII	3088064	A	sft-1	sense	intron
chrIII	11992772	A	wah-1	sense	intron
chrIII	13282934	A	unc-64	sense	intron
chrIII	12646088	A	pqn-80	sense	intron
chrIII	12646089	A	pqn-80	sense	intron
chrIII	12621514	A	Y111B2A.12	sense	intron
chrIII	4437708	A	C28A5.2	antisense	intron
chrIII	3088081	A	sft-1	sense	intron
chrIII	13283028	A	unc-64	sense	intron
chrIII	13283031	A	unc-64	sense	intron
chrIII	12170973	A	ND	NA	intergenic
chrIII	12170974	A	ND	NA	intergenic
chrIII	2582240	A	ND	NA	intergenic
chrIII	2186980	A	gcn-1	sense	intron
chrIII	3088104	A	sft-1	sense	intron
chrIII	2582254	A	ND	NA	intergenic
chrIII	12646127	A	pqn-80	sense	intron
chrIII	13283063	A	unc-64	sense	intron
chrIII	2707195	A	ND	NA	intergenic
chrIII	5459585	A	F48E8.4	sense	3utr
chrIII	2707210	A	ND	NA	intergenic
chrIII	5459586	A	F48E8.4	sense	3utr
chrIII	2582288	A	ND	NA	intergenic
chrIII	2707217	A	ND	NA	intergenic
chrIII	2582292	A	ND	NA	intergenic
chrIII	7474966	A	ND	NA	intergenic
chrIII	7474981	A	ND	NA	intergenic
chrIII	11923239	A	Y56A3A.22	sense	intron
chrIII	7601960	A	ND	NA	intergenic
chrIII	7601961	A	ND	NA	intergenic
chrIII	1574699	A	rep-1	sense	intron
chrIII	7474992	A	ND	NA	intergenic
chrIII	12739553	A	ssl-1	sense	intron
chrIII	1574764	A	rep-1	sense	intron
chrIII	1574765	A	rep-1	sense	intron
chrIII	2506611	A	Y54F10AM.8	antisense	intron
chrIII	1574773	A	rep-1	sense	intron
chrIII	1574785	A	rep-1	sense	intron
chrIII	9586562	A	C48B4.1	antisense	3utr
chrIII	200591	A	F40G9.17	sense	intron
chrIII	13350804	A	mtm-6	sense	intron
chrIII	9563801	A	C48B4.10	antisense	intron
chrIII	12730275	A	ssl-1	sense	intron
chrIII	200614	A	F40G9.17	sense	intron
chrIII	12466090	A	ND	NA	intergenic
chrIII	12466092	A	ND	NA	intergenic
chrIII	12466095	A	ND	NA	intergenic
chrIII	12466099	A	ND	NA	intergenic
chrIII	4661178	A	cdka-1	sense	intron
chrIII	12466112	A	ND	NA	intergenic
chrIII	1281990	A	ND	NA	intergenic
chrIII	12466129	A	ND	NA	intergenic
chrIII	12466130	A	ND	NA	intergenic
chrIII	200660	A	F40G9.17	sense	intron
chrIII	200673	A	F40G9.17	sense	intron
chrIII	200684	A	F40G9.17	sense	intron
chrIII	12502013	A	Y111B2A.4	sense	intron
chrIII	1568752	A	Y67D2.2	sense	intron
chrIII	200693	A	F40G9.17	sense	intron
chrIII	200695	A	F40G9.17	sense	intron
chrIII	13203450	A	gly-5	sense	intron
chrIII	13203451	A	gly-5	sense	intron
chrIV	11376131	A	cbd-1	sense	intron
chrIV	1609228	A	ND	NA	intergenic
chrIV	1666063	A	Y41D4B.4	sense	intron
chrIV	1666064	A	Y41D4B.4	sense	intron
chrIV	7920985	A	xpo-3	antisense	intron
chrIV	2367000	A	Y38F2AR.5	sense	intron
chrIV	2367001	A	Y38F2AR.5	sense	intron
chrIV	5182725	A	W03F8.10	sense	intron
chrIV	7920668	A	xpo-3	antisense	intron
chrIV	1599007	A	ced-2	sense	intron
chrIV	7920672	A	xpo-3	antisense	intron
chrIV	14860834	A	Y57G11C.23	antisense	intron
chrIV	14461498	A	LLC1.2	sense	intron
chrIV	10607388	A	R09H10.3	sense	intron
chrIV	7920680	A	xpo-3	antisense	intron
chrIV	16416860	A	ND	NA	intergenic
chrIV	2366507	A	Y38F2AR.5	sense	intron
chrIV	2366508	A	Y38F2AR.5	sense	intron
chrIV	3248687	A	Y67D8A.1	sense	intron
chrIV	3248688	A	Y67D8A.1	sense	intron
chrIV	12827185	A	F07C6.4	sense	intron
chrIV	15047731	A	Y41E3.11	sense	intron
chrIV	15047736	A	Y41E3.11	sense	intron
chrIV	5403828	A	ZK616.1	sense	intron
chrIV	1990202	A	Y76B12C.6	sense	intron
chrIV	5182239	A	W03F8.10	sense	intron
chrIV	411203	A	ND	NA	intergenic
chrIV	1249865	A	clec-166	antisense	intron
chrIV	8124250	A	ND	NA	intergenic
chrIV	4772431	A	R11E3.2	sense	intron
chrIV	8999508	A	mltn-12	sense	intron
chrIV	8124489	A	ND	NA	intergenic
chrIV	12380251	A	thn-1	sense	coding
chrIV	9881692	A	nhr-4	sense	intron
chrIV	8748127	A	pme-3	sense	intron
chrIV	1974371	A	Y76B12C.3	sense	intron
chrIV	2138724	A	C54E4.2	sense	intron
chrIV	1666149	A	Y41D4B.4	sense	intron
chrIV	9881702	A	nhr-4	sense	intron
chrIV	2050666	A	ND	NA	intergenic
chrIV	397420	A	T07A9.8	sense	intron
chrIV	397428	A	T07A9.8	sense	intron
chrIV	8124022	A	ND	NA	intergenic
chrIV	13790327	A	Y45F10D.7	sense	intron
chrIV	397418	A	T07A9.8	sense	intron
chrIV	3248256	A	Y67D8A.1	sense	intron
chrIV	13743233	A	ND	NA	intergenic
chrIV	3248258	A	Y67D8A.1	sense	intron
chrIV	1557635	A	K03H6.6	antisense	intron
chrIV	15048444	A	Y41E3.11	sense	intron
chrIV	7920671	A	xpo-3	antisense	intron
chrIV	852619	A	Y55F3BR.8	antisense	intron
chrIV	1598093	A	ced-2	sense	intron
chrIV	9881539	A	nhr-4	sense	intron
chrIV	397460	A	T07A9.8	sense	intron
chrIV	397461	A	T07A9.8	sense	intron
chrIV	17253056	A	ZK550.3	sense	intron
chrIV	1199262	A	Y104H12D.3	sense	intron
chrIV	9881541	A	nhr-4	sense	intron
chrIV	1599136	A	ced-2	sense	intron
chrIV	397474	A	T07A9.8	sense	intron
chrIV	13319331	A	Y67H2A.9	sense	intron
chrIV	12887750	A	K08D8.6	antisense	intron
chrIV	1599144	A	ced-2	sense	intron
chrIV	3262633	A	T26C12.1	sense	intron
chrIV	8124586	A	ND	NA	intergenic
chrIV	995502	A	Y55F3AM.6	sense	intron
chrIV	1609391	A	ND	NA	intergenic
chrIV	2367667	A	Y38F2AR.5	sense	intron
chrIV	4088500	A	C35B1.2	sense	intron
chrIV	7798388	A	klp-10	sense	intron
chrIV	447162	A	dpm-1	sense	intron
chrIV	397499	A	T07A9.8	sense	intron
chrIV	1199296	A	Y104H12D.3	sense	intron
chrIV	5182240	A	W03F8.10	sense	intron
chrIV	3145922	A	T23E1.2	sense	intron
chrIV	1733827	A	Y41D4A.5	antisense	intron
chrIV	1733828	A	Y41D4A.5	antisense	intron
chrIV	1734854	A	Y41D4A.5	antisense	intron
chrIV	1199303	A	Y104H12D.3	sense	intron
chrIV	5182156	A	W03F8.10	sense	intron
chrIV	1730762	A	Y41D4A.5	antisense	intron
chrIV	1730763	A	Y41D4A.5	antisense	intron
chrIV	1199308	A	Y104H12D.3	sense	intron
chrIV	181456	A	tcl-2	sense	intron
chrIV	7921016	A	xpo-3	antisense	intron
chrIV	995539	A	Y55F3AM.6	sense	intron
chrIV	5182680	A	W03F8.10	sense	intron
chrIV	2800347	A	Y54G2A.10	sense	intron
chrIV	1987804	A	Y76B12C.6	sense	intron
chrIV	5182174	A	W03F8.10	sense	intron
chrIV	5182179	A	W03F8.10	sense	intron
chrIV	13384423	A	Y62E10A.20	antisense	intron
chrIV	2141417	A	C54E4.2	sense	intron
chrIV	17011154	A	rom-4	sense	intron
chrIV	1599214	A	ced-2	sense	intron
chrIV	1599215	A	ced-2	sense	intron
chrIV	1977072	A	ND	NA	intergenic
chrIV	14860840	A	Y57G11C.23	antisense	intron
chrIV	1599187	A	ced-2	sense	intron
chrIV	200438	A	csn-3	sense	intron
chrIV	15048439	A	Y41E3.11	sense	intron
chrIV	15030520	A	fcd-2	sense	intron
chrIV	2609401	A	Y69A2AR.6	sense	intron
chrIV	1668860	A	Y41D4B.4	sense	intron
chrIV	1668861	A	Y41D4B.4	sense	intron
chrIV	5182206	A	W03F8.10	sense	intron
chrIV	6355925	A	ND	NA	intergenic
chrIV	1734912	A	Y41D4A.5	antisense	intron
chrIV	1734913	A	Y41D4A.5	antisense	intron
chrIV	2375638	A	Y38F2AR.5	sense	intron
chrIV	2141447	A	C54E4.2	sense	intron
chrIV	7920684	A	xpo-3	antisense	intron
chrIV	15446285	A	Y73F8A.24	antisense	intron
chrIV	1987855	A	Y76B12C.6	sense	intron
chrIV	4723986	A	ND	NA	intergenic
chrIV	3248259	A	Y67D8A.1	sense	intron
chrIV	5182232	A	W03F8.10	sense	intron
chrIV	2365211	A	Y38F2AR.5	sense	intron
chrIV	2365212	A	Y38F2AR.5	sense	intron
chrIV	10607390	A	R09H10.3	sense	intron
chrIV	2609439	A	Y69A2AR.6	sense	intron
chrIV	633120	A	nhr-76	sense	intron
chrIV	4552487	A	ND	NA	intergenic
chrIV	2609448	A	Y69A2AR.6	sense	intron
chrIV	6975785	A	pgl-1	antisense	intron
chrIV	15048492	A	Y41E3.11	sense	intron
chrIV	4724014	A	ND	NA	intergenic
chrIV	1598771	A	ced-2	sense	intron
chrIV	5182213	A	W03F8.10	sense	intron
chrIV	446774	A	dpm-1	sense	intron
chrIV	2365239	A	Y38F2AR.5	sense	intron
chrIV	2365240	A	Y38F2AR.5	sense	intron
chrIV	15446332	A	Y73F8A.24	antisense	intron
chrIV	2145086	A	C54E4.2	sense	intron
chrIV	411455	A	ND	NA	intergenic
chrIV	2375648	A	Y38F2AR.5	sense	intron
chrIV	13743243	A	ND	NA	intergenic
chrIV	1598276	A	ced-2	sense	intron
chrIV	1598277	A	ced-2	sense	intron
chrIV	3218761	A	ND	NA	intergenic
chrIV	3218762	A	ND	NA	intergenic
chrIV	8124236	A	ND	NA	intergenic
chrIV	3248612	A	Y67D8A.1	sense	intron
chrIV	1668946	A	Y41D4B.4	sense	intron
chrIV	7920981	A	xpo-3	antisense	intron
chrIV	15047737	A	Y41E3.11	sense	intron
chrIV	7920984	A	xpo-3	antisense	intron
chrIV	1598809	A	ced-2	sense	intron
chrIV	2207578	A	Y71G10AR.1	sense	intron
chrIV	446812	A	dpm-1	sense	intron
chrIV	7920698	A	xpo-3	antisense	intron
chrIV	13242307	A	lin-54	sense	intron
chrIV	13225827	A	ND	NA	intergenic
chrIV	11132522	A	ard-1	sense	intron
chrIV	7920998	A	xpo-3	antisense	intron
chrIV	15641960	A	Y105C5A.13	sense	intron
chrIV	1201513	A	Y104H12D.3	sense	3utr
chrIV	1201518	A	Y104H12D.3	sense	3utr
chrIV	7921009	A	xpo-3	antisense	intron
chrIV	15048564	A	Y41E3.11	sense	intron
chrIV	3058040	A	Y67D8C.3	sense	intron
chrIV	3058041	A	Y67D8C.3	sense	intron
chrIV	7799165	A	klp-10	sense	coding
chrIV	1599125	A	ced-2	sense	intron
chrIV	4125058	A	F49F1.7	antisense	intron
chrIV	12827011	A	F07C6.4	sense	intron
chrIV	13665672	A	fbxa-215	antisense	intron
chrIV	9596815	A	ND	NA	intergenic
chrIV	11530104	A	M04B2.2	sense	intron
chrIV	8124483	A	ND	NA	intergenic
chrIV	8124585	A	ND	NA	intergenic
chrIV	7527835	A	ND	NA	intergenic
chrIV	1394078	A	nhr-41	sense	intron
chrIV	15642864	A	Y105C5A.13	sense	intron
chrIV	13183395	A	F58D2.1	sense	intron
chrIV	14860835	A	Y57G11C.23	antisense	intron
chrIV	12827121	A	F07C6.4	sense	intron
chrIV	9596843	A	ND	NA	intergenic
chrIV	15642541	A	Y105C5A.13	sense	intron
chrIV	8963503	A	D1046.5	sense	intron
chrIV	6356723	A	ND	NA	intergenic
chrIV	1402804	A	ND	NA	intergenic
chrIV	2602935	A	Y69A2AR.7	sense	intron
chrIV	7527865	A	ND	NA	intergenic
chrIV	1598906	A	ced-2	sense	intron
chrIV	1402811	A	ND	NA	intergenic
chrIV	1598400	A	ced-2	sense	intron
chrIV	8747970	A	pme-3	sense	intron
chrIV	1402819	A	ND	NA	intergenic
chrIV	1402821	A	ND	NA	intergenic
chrIV	8747976	A	pme-3	sense	intron
chrIV	1199050	A	Y104H12D.3	sense	intron
chrIV	7527885	A	ND	NA	intergenic
chrIV	6355920	A	ND	NA	intergenic
chrIV	1402834	A	ND	NA	intergenic
chrIV	9596884	A	ND	NA	intergenic
chrIV	2375637	A	Y38F2AR.5	sense	intron
chrIV	1199062	A	Y104H12D.3	sense	intron
chrIV	327639	A	ND	NA	intergenic
chrIV	1609180	A	ND	NA	intergenic
chrIV	16267229	A	ND	NA	intergenic
chrIV	1597918	A	ced-2	sense	intron
chrIV	1597920	A	ced-2	sense	intron
chrIV	1598947	A	ced-2	sense	intron
chrIV	1598948	A	ced-2	sense	intron
chrIV	15048541	A	Y41E3.11	sense	intron
chrIV	1597928	A	ced-2	sense	intron
chrIV	1609193	A	ND	NA	intergenic
chrIV	13319146	A	Y67H2A.9	sense	intron
chrIV	1733800	A	Y41D4A.5	antisense	intron
chrIV	12827123	A	F07C6.4	sense	intron
chrIV	1609204	A	ND	NA	intergenic
chrIV	1597942	A	ced-2	sense	intron
chrIV	1201655	A	Y104H12D.3	sense	3utr
chrIV	13388319	A	lsm-3	sense	intron
chrIV	12931668	A	ND	NA	intergenic
chrIV	15048191	A	Y41E3.11	sense	intron
chrI	10819585	A	ND	NA	intergenic
chrI	14870538	A	F11C3.1	sense	intron
chrI	10819987	A	ND	NA	intergenic
chrI	4833298	A	F57C9.4	sense	intron
chrI	2930712	A	nxt-1	sense	intron
chrI	2734105	A	Y71F9B.2	sense	intron
chrI	1375919	A	ND	NA	intergenic
chrI	2076705	A	Y37E3.10	sense	3utr
chrI	10819622	A	ND	NA	intergenic
chrI	10819625	A	ND	NA	intergenic
chrI	13486126	A	Y48G10A.2	antisense	intron
chrI	5269551	A	B0261.7	antisense	3utr
chrI	8650802	A	sig-7	sense	intron
chrI	3230046	A	Y54E10A.3	sense	intron
chrI	10820276	A	ND	NA	intergenic
chrI	13772041	A	ND	NA	intergenic
chrI	1824831	A	Y71G12B.1	sense	intron
chrI	13486148	A	Y48G10A.2	antisense	intron
chrI	2060361	A	ND	NA	intergenic
chrI	13486155	A	Y48G10A.2	antisense	intron
chrI	5795919	A	mtk-1	antisense	intron
chrI	12748882	A	ND	NA	intergenic
chrI	184403	A	ND	NA	intergenic
chrI	622679	A	F56A6.4	antisense	intron
chrI	14649663	A	bath-40	sense	intron
chrI	12748891	A	ND	NA	intergenic
chrI	2076769	A	Y37E3.10	sense	3utr
chrI	1824866	A	Y71G12B.1	sense	intron
chrI	10819686	A	ND	NA	intergenic
chrI	10819687	A	ND	NA	intergenic
chrI	622696	A	F56A6.4	antisense	intron
chrI	2728047	A	ND	NA	intergenic
chrI	2404470	A	zwl-1	sense	intron
chrI	8982652	A	fasn-1	antisense	intron
chrI	3229822	A	Y54E10A.3	sense	intron
chrI	1243499	A	Y48G8AL.1	sense	intron
chrI	10819717	A	ND	NA	intergenic
chrI	2889864	A	arx-1	antisense	intron
chrI	1243500	A	Y48G8AL.1	sense	intron
chrI	616813	A	F56A6.4	antisense	intron
chrI	2314387	A	Y39G10AR.8	sense	intron
chrI	3034139	A	Y54E10BR.2	sense	intron
chrI	10819749	A	ND	NA	intergenic
chrI	7004328	A	ND	NA	intergenic
chrI	2930858	A	nxt-1	sense	intron
chrI	10819759	A	ND	NA	intergenic
chrI	7004336	A	ND	NA	intergenic
chrI	411831	A	Y50C1A.1	sense	intron
chrI	3229880	A	Y54E10A.3	sense	intron
chrI	7004356	A	ND	NA	intergenic
chrI	10819276	A	ND	NA	intergenic
chrI	2408650	A	zwl-1	sense	intron
chrI	2033869	A	Y20F4.2	sense	3utr
chrI	2869456	A	ND	NA	intergenic
chrI	616824	A	F56A6.4	antisense	intron
chrI	13447379	A	spr-5	sense	intron
chrI	10820302	A	ND	NA	intergenic
chrI	1417431	A	Y92H12BR.3	sense	intron
chrI	2033881	A	Y20F4.2	sense	3utr
chrI	2033884	A	Y20F4.2	sense	3utr
chrI	12749021	A	ND	NA	intergenic
chrI	13771813	A	ND	NA	intergenic
chrI	2033891	A	Y20F4.2	sense	3utr
chrI	2033896	A	Y20F4.2	sense	3utr
chrI	14772460	A	F39B2.7	antisense	intron
chrI	7248836	A	lin-61	antisense	3utr
chrI	3167614	A	ND	NA	intergenic
chrI	10457335	A	ND	NA	intergenic
chrI	5685500	A	unc-40	antisense	intron
chrI	2715901	A	lin-17	sense	intron
chrI	1882368	A	tub-2	sense	intron
chrI	2003202	A	gap-3	antisense	intron
chrI	3568683	A	lpd-3	antisense	intron
chrI	2003207	A	gap-3	antisense	intron
chrI	2889993	A	arx-1	antisense	intron
chrI	1569040	A	src-1	sense	intron
chrI	12742933	A	uba-2	sense	intron
chrI	1376534	A	ND	NA	intergenic
chrI	1376535	A	ND	NA	intergenic
chrI	3167620	A	ND	NA	intergenic
chrI	1882395	A	tub-2	sense	intron
chrI	1376542	A	ND	NA	intergenic
chrI	3507589	A	Y47G6A.7	sense	intron
chrI	1376547	A	ND	NA	intergenic
chrI	1376548	A	ND	NA	intergenic
chrI	1376549	A	ND	NA	intergenic
chrI	2056491	A	ND	NA	intergenic
chrI	10819885	A	ND	NA	intergenic
chrI	2056499	A	ND	NA	intergenic
chrI	2930997	A	nxt-1	sense	intron
chrI	2930998	A	nxt-1	sense	intron
chrI	1376567	A	ND	NA	intergenic
chrI	2060602	A	ND	NA	intergenic
chrI	2060603	A	ND	NA	intergenic
chrI	10819900	A	ND	NA	intergenic
chrI	1440063	A	Y92H12BR.8	sense	intron
chrI	11603339	A	ND	NA	intergenic
chrI	10819911	A	ND	NA	intergenic
chrI	7098697	A	ND	NA	intergenic
chrI	12749131	A	ND	NA	intergenic
chrI	2715980	A	lin-17	sense	intron
chrI	2869583	A	ND	NA	intergenic
chrI	2060626	A	ND	NA	intergenic
chrI	2408788	A	zwl-1	sense	intron
chrI	2869589	A	ND	NA	intergenic
chrI	1825113	A	Y71G12B.1	sense	intron
chrI	13771829	A	ND	NA	intergenic
chrI	1347933	A	ND	NA	intergenic
chrI	1347934	A	ND	NA	intergenic
chrI	2734436	A	Y71F9B.2	sense	intron
chrI	2716005	A	lin-17	sense	intron
chrI	3034240	A	Y54E10BR.2	sense	intron
chrI	1825131	A	Y71G12B.1	sense	intron
chrI	2716012	A	lin-17	sense	intron
chrI	2890130	A	arx-1	antisense	intron
chrI	2204051	A	afd-1	sense	intron
chrI	2716024	A	lin-17	sense	intron
chrI	1347964	A	ND	NA	intergenic
chrI	616830	A	F56A6.4	antisense	intron
chrI	3167638	A	ND	NA	intergenic
chrI	2204042	A	afd-1	sense	intron
chrI	1706381	A	Y71G12B.13	sense	intron
chrI	901518	A	gpa-16	sense	intron
chrI	2890129	A	arx-1	antisense	intron
chrI	2204050	A	afd-1	sense	intron
chrI	2890131	A	arx-1	antisense	intron
chrI	2034075	A	ND	NA	intergenic
chrI	10819997	A	ND	NA	intergenic
chrI	2034078	A	ND	NA	intergenic
chrI	10820001	A	ND	NA	intergenic
chrI	1825186	A	Y71G12B.1	sense	intron
chrI	1752476	A	Y71G12B.10	sense	intron
chrI	3507588	A	Y47G6A.7	sense	intron
chrI	3230129	A	Y54E10A.3	sense	intron
chrI	2716082	A	lin-17	sense	intron
chrI	2716083	A	lin-17	sense	intron
chrI	10820026	A	ND	NA	intergenic
chrI	13771850	A	ND	NA	intergenic
chrI	2716095	A	lin-17	sense	intron
chrI	10184096	A	ND	NA	intergenic
chrI	2716098	A	lin-17	sense	intron
chrI	3034529	A	Y54E10BR.2	sense	intron
chrI	1161680	A	Y48G8AL.7	sense	intron
chrI	1358584	A	Y92H12BL.1	sense	intron
chrI	10439123	A	Y106G6H.5	antisense	intron
chrI	1358586	A	Y92H12BL.1	sense	intron
chrI	1825248	A	Y71G12B.1	sense	intron
chrI	1825249	A	Y71G12B.1	sense	intron
chrI	13771858	A	ND	NA	intergenic
chrI	2314734	A	Y39G10AR.8	sense	intron
chrI	2314735	A	Y39G10AR.8	sense	intron
chrI	3230193	A	Y54E10A.3	sense	intron
chrI	11227639	A	nfya-2	sense	intron
chrI	1696254	A	ND	NA	intergenic
chrI	14649861	A	bath-40	sense	intron
chrI	10820103	A	ND	NA	intergenic
chrI	1824855	A	Y71G12B.1	sense	intron
chrI	3230225	A	Y54E10A.3	sense	intron
chrI	3828242	A	ND	NA	intergenic
chrI	2488857	A	eif-3.I	sense	intron
chrI	12048923	A	ksr-2	antisense	intron
chrI	2314782	A	Y39G10AR.8	sense	intron
chrI	10820127	A	ND	NA	intergenic
chrI	10820133	A	ND	NA	intergenic
chrI	1417785	A	Y92H12BR.3	sense	intron
chrI	1417786	A	Y92H12BR.3	sense	intron
chrI	12974651	A	gale-1	sense	intron
chrI	10939146	A	prp-17	sense	intron
chrI	10820158	A	ND	NA	intergenic
chrI	3506752	A	Y47G6A.7	sense	intron
chrI	2488898	A	eif-3.I	sense	intron
chrI	13777478	A	Y37H9A.1	sense	intron
chrI	13486665	A	Y48G10A.2	antisense	intron
chrI	2314826	A	Y39G10AR.8	sense	intron
chrI	10820171	A	ND	NA	intergenic
chrI	622690	A	F56A6.4	antisense	intron
chrI	13486670	A	Y48G10A.2	antisense	intron
chrI	3506769	A	Y47G6A.7	sense	intron
chrI	3506770	A	Y47G6A.7	sense	intron
chrI	10820180	A	ND	NA	intergenic
chrI	10820181	A	ND	NA	intergenic
chrI	3506781	A	Y47G6A.7	sense	intron
chrI	2314846	A	Y39G10AR.8	sense	intron
chrI	2314850	A	Y39G10AR.8	sense	intron
chrI	10820198	A	ND	NA	intergenic
chrI	6473489	A	K06A5.1	sense	intron
chrI	14365867	A	Y105E8A.3	sense	intron
chrI	7586411	A	prg-1	antisense	intron
chrI	10820204	A	ND	NA	intergenic
chrI	1703699	A	Y71G12B.13	sense	intron
chrI	1417846	A	Y92H12BR.3	sense	intron
chrI	1417847	A	Y92H12BR.3	sense	intron
chrI	5132924	A	Y110A7A.6	sense	intron
chrI	1753878	A	Y71G12B.10	sense	intron
chrI	1358481	A	Y92H12BL.1	sense	3utr
chrI	13484696	A	Y48G10A.2	antisense	intron
chrI	1358491	A	Y92H12BL.1	sense	3utr
chrI	10819354	A	ND	NA	intergenic
chrI	1358496	A	Y92H12BL.1	sense	3utr
chrI	1696420	A	ND	NA	intergenic
chrI	1358503	A	Y92H12BL.1	sense	3utr
chrI	1358504	A	Y92H12BL.1	sense	3utr
chrI	1358506	A	Y92H12BL.1	sense	3utr
chrI	10820039	A	ND	NA	intergenic
chrI	10820275	A	ND	NA	intergenic
chrI	1358516	A	Y92H12BL.1	sense	3utr
chrI	1358517	A	Y92H12BL.1	sense	3utr
chrI	10820281	A	ND	NA	intergenic
chrI	1358528	A	Y92H12BL.1	sense	intron
chrI	10820295	A	ND	NA	intergenic
chrI	1696463	A	ND	NA	intergenic
chrI	10820304	A	ND	NA	intergenic
chrI	14664062	A	ND	NA	intergenic
chrI	1358550	A	Y92H12BL.1	sense	intron
chrI	1358556	A	Y92H12BL.1	sense	intron
chrI	1358569	A	Y92H12BL.1	sense	intron
chrI	3167753	A	dnc-6	sense	5utr
chrI	7004911	A	ND	NA	intergenic
chrI	1358580	A	Y92H12BL.1	sense	intron
chrI	7004917	A	ND	NA	intergenic
chrI	2171640	A	afd-1	sense	intron
chrI	1358585	A	Y92H12BL.1	sense	intron
chrI	2415354	A	F23C8.13	sense	intron
chrI	1358587	A	Y92H12BL.1	sense	intron
chrI	10820353	A	ND	NA	intergenic
chrI	2171645	A	afd-1	sense	intron
chrI	10820350	A	ND	NA	intergenic
chrI	7502591	A	pbrm-1	sense	intron
chrI	2415361	A	F23C8.13	sense	intron
chrI	2734852	A	Y71F9B.2	sense	intron
chrI	1493765	A	Y92H12A.5	antisense	intron
chrI	2716424	A	lin-17	sense	intron
chrI	5347586	A	F55A12.5	sense	intron
chrI	10820366	A	ND	NA	intergenic
chrI	10939153	A	prp-17	sense	intron
chrI	10819374	A	ND	NA	intergenic
chrI	2716438	A	lin-17	sense	intron
chrI	2415384	A	F23C8.13	sense	intron
chrI	2415385	A	F23C8.13	sense	intron
chrI	1358622	A	Y92H12BL.1	sense	intron
chrI	1620774	A	ND	NA	intergenic
chrI	10939175	A	prp-17	sense	intron
chrI	10939176	A	prp-17	sense	intron
chrI	10820402	A	ND	NA	intergenic
chrI	10820401	A	ND	NA	intergenic
chrI	9956146	A	T24D1.5	antisense	3utr
chrI	2716470	A	lin-17	sense	intron
chrI	10819721	A	ND	NA	intergenic
chrI	10820416	A	ND	NA	intergenic
chrI	14649824	A	bath-40	sense	intron
chrI	5002518	A	ND	NA	intergenic
chrI	1493828	A	Y92H12A.5	antisense	intron
chrI	1493829	A	Y92H12A.5	antisense	intron
chrI	1418056	A	Y92H12BR.3	sense	intron
chrI	3033929	A	Y54E10BR.2	sense	intron
chrI	1418059	A	Y92H12BR.3	sense	intron
chrI	1254221	A	Y48G8AL.1	sense	intron
chrI	3033936	A	Y54E10BR.2	sense	intron
chrI	14365526	A	Y105E8A.3	sense	intron
chrI	3033943	A	Y54E10BR.2	sense	intron
chrI	514904	A	acs-13	antisense	intron
chrI	10820442	A	ND	NA	intergenic
chrI	7004303	A	ND	NA	intergenic
chrI	1696604	A	ND	NA	intergenic
chrI	1696605	A	ND	NA	intergenic
chrI	10820451	A	ND	NA	intergenic
chrI	7005031	A	ND	NA	intergenic
chrI	7005032	A	ND	NA	intergenic
chrI	1418090	A	Y92H12BR.3	sense	intron
chrI	10820462	A	ND	NA	intergenic
chrI	3033967	A	Y54E10BR.2	sense	intron
chrI	10820465	A	ND	NA	intergenic
chrI	1620850	A	ND	NA	intergenic
chrI	9132915	A	mel-26	sense	intron
chrI	7005048	A	ND	NA	intergenic
chrI	3033981	A	Y54E10BR.2	sense	intron
chrI	1358719	A	Y92H12BL.1	sense	intron
chrI	3033987	A	Y54E10BR.2	sense	intron
chrI	3033988	A	Y54E10BR.2	sense	intron
chrI	1868688	A	scm-1	antisense	intron
chrI	10820499	A	ND	NA	intergenic
chrI	1358742	A	Y92H12BL.1	sense	intron
chrI	1751959	A	Y71G12B.10	sense	intron
chrI	6228804	A	T08B2.3	sense	intron
chrI	10820508	A	ND	NA	intergenic
chrI	2010165	A	gap-3	antisense	intron
chrI	2415519	A	F23C8.13	sense	intron
chrI	1358753	A	Y92H12BL.1	sense	intron
chrI	1358763	A	Y92H12BL.1	sense	intron
chrI	1358765	A	Y92H12BL.1	sense	intron
chrI	1868719	A	scm-1	antisense	intron
chrI	13826130	A	W09G3.6	antisense	intron
chrI	1358772	A	Y92H12BL.1	sense	intron
chrI	1358773	A	Y92H12BL.1	sense	intron
chrI	2296760	A	Y39G10AR.11	sense	intron
chrI	2296761	A	Y39G10AR.11	sense	intron
chrI	7005117	A	ND	NA	intergenic
chrI	13772277	A	ND	NA	intergenic
chrI	2415555	A	F23C8.13	sense	intron
chrI	2296772	A	Y39G10AR.11	sense	intron
chrI	2296773	A	Y39G10AR.11	sense	intron
chrI	1358790	A	Y92H12BL.1	sense	intron
chrI	3034056	A	Y54E10BR.2	sense	intron
chrI	1868746	A	scm-1	antisense	intron
chrI	2415569	A	F23C8.13	sense	intron
chrI	2296787	A	Y39G10AR.11	sense	intron
chrI	2716630	A	lin-17	sense	intron
chrI	1358812	A	Y92H12BL.1	sense	intron
chrI	1868765	A	scm-1	antisense	intron
chrI	1868774	A	scm-1	antisense	intron
chrI	2489319	A	eif-3.I	sense	intron
chrI	1418216	A	Y92H12BR.3	sense	intron
chrI	1418217	A	Y92H12BR.3	sense	intron
chrI	1358826	A	Y92H12BL.1	sense	intron
chrI	629740	A	ND	NA	intergenic
chrI	629741	A	ND	NA	intergenic
chrI	1696764	A	ND	NA	intergenic
chrI	1358850	A	Y92H12BL.1	sense	intron
chrI	13771947	A	ND	NA	intergenic
chrI	10939400	A	prp-17	sense	intron
chrI	2143746	A	Y37E3.17	sense	intron
chrI	1358864	A	Y92H12BL.1	sense	intron
chrI	10819544	A	ND	NA	intergenic
chrI	629781	A	ND	NA	intergenic
chrI	629787	A	ND	NA	intergenic
chrI	1975328	A	ND	NA	intergenic
chrI	629797	A	ND	NA	intergenic
chrI	1358891	A	Y92H12BL.1	sense	intron
chrI	1358892	A	Y92H12BL.1	sense	intron
chrI	13771825	A	ND	NA	intergenic
chrI	629813	A	ND	NA	intergenic
chrI	13771830	A	ND	NA	intergenic
chrI	7223	A	Y74C9A.3	antisense	intron
chrI	3034168	A	Y54E10BR.2	sense	intron
chrI	1358905	A	Y92H12BL.1	sense	intron
chrI	3034173	A	Y54E10BR.2	sense	intron
chrI	1358917	A	Y92H12BL.1	sense	intron
chrI	3034182	A	Y54E10BR.2	sense	intron
chrI	1422407	A	Y92H12BR.3	sense	intron
chrI	1358922	A	Y92H12BL.1	sense	intron
chrI	3229879	A	Y54E10A.3	sense	intron
chrI	1358924	A	Y92H12BL.1	sense	intron
chrI	1741903	A	mppa-1	antisense	intron
chrI	13771857	A	ND	NA	intergenic
chrI	1358930	A	Y92H12BL.1	sense	intron
chrI	3230804	A	Y54E10A.3	sense	intron
chrI	1358935	A	Y92H12BL.1	sense	intron
chrI	2296922	A	Y39G10AR.11	sense	intron
chrI	1358939	A	Y92H12BL.1	sense	intron
chrI	1358940	A	Y92H12BL.1	sense	intron
chrI	1358941	A	Y92H12BL.1	sense	intron
chrI	2296927	A	Y39G10AR.11	sense	intron
chrI	3034208	A	Y54E10BR.2	sense	intron
chrI	3034209	A	Y54E10BR.2	sense	intron
chrI	14365883	A	Y105E8A.3	sense	intron
chrI	13413477	A	ND	NA	intergenic
chrI	11603046	A	ND	NA	intergenic
chrI	11603047	A	ND	NA	intergenic
chrI	14365884	A	Y105E8A.3	sense	intron
chrI	2438250	A	ND	NA	intergenic
chrI	2438251	A	ND	NA	intergenic
chrI	1358957	A	Y92H12BL.1	sense	intron
chrI	2296942	A	Y39G10AR.11	sense	intron
chrI	1358959	A	Y92H12BL.1	sense	intron
chrI	3034225	A	Y54E10BR.2	sense	intron
chrI	3230834	A	Y54E10A.3	sense	intron
chrI	11232374	A	nfya-2	sense	intron
chrI	11232375	A	nfya-2	sense	intron
chrI	3034232	A	Y54E10BR.2	sense	intron
chrI	14365546	A	Y105E8A.3	sense	intron
chrI	2296960	A	Y39G10AR.11	sense	intron
chrI	2296973	A	Y39G10AR.11	sense	intron
chrI	10439822	A	Y106G6H.5	antisense	intron
chrI	5149846	A	ND	NA	intergenic
chrI	5149847	A	ND	NA	intergenic
chrI	6229148	A	T08B2.3	sense	intron
chrI	1347981	A	ND	NA	intergenic
chrI	13772316	A	ND	NA	intergenic
chrI	7004359	A	ND	NA	intergenic
chrI	7344	A	Y74C9A.3	antisense	intron
chrI	10820126	A	ND	NA	intergenic
chrI	13771961	A	ND	NA	intergenic
chrI	3034298	A	Y54E10BR.2	sense	intron
chrI	3034299	A	Y54E10BR.2	sense	intron
chrI	6229180	A	T08B2.3	sense	intron
chrI	13448388	A	spr-5	sense	intron
chrI	1359049	A	Y92H12BL.1	sense	intron
chrI	13159630	A	F22G12.4	antisense	intron
chrI	1418449	A	Y92H12BR.3	sense	intron
chrI	13486477	A	Y48G10A.2	antisense	intron
chrI	14365913	A	Y105E8A.3	sense	intron
chrI	6229211	A	T08B2.3	sense	intron
chrI	3034339	A	Y54E10BR.2	sense	intron
chrI	3034343	A	Y54E10BR.2	sense	intron
chrI	3034352	A	Y54E10BR.2	sense	intron
chrI	3034356	A	Y54E10BR.2	sense	intron
chrI	13772022	A	ND	NA	intergenic
chrI	1359097	A	Y92H12BL.1	sense	intron
chrI	3034363	A	Y54E10BR.2	sense	intron
chrI	13772030	A	ND	NA	intergenic
chrI	7177471	A	ND	NA	intergenic
chrI	3034369	A	Y54E10BR.2	sense	intron
chrI	10819211	A	ND	NA	intergenic
chrI	2129161	A	Y37E3.17	sense	intron
chrI	2129162	A	Y37E3.17	sense	intron
chrI	3034384	A	Y54E10BR.2	sense	intron
chrI	3034385	A	Y54E10BR.2	sense	intron
chrI	13772050	A	ND	NA	intergenic
chrI	6106410	A	T27A3.6	antisense	intron
chrI	3034390	A	Y54E10BR.2	sense	intron
chrI	6968273	A	C30F12.2	antisense	intron
chrI	3167523	A	Y54E10A.6	sense	3utr
chrI	10819462	A	ND	NA	intergenic
chrI	3167527	A	Y54E10A.6	sense	3utr
chrI	10020137	A	F10G8.1	sense	3utr
chrI	3167530	A	Y54E10A.6	sense	3utr
chrI	2729259	A	ND	NA	intergenic
chrI	3167534	A	Y54E10A.6	sense	3utr
chrI	14649565	A	bath-40	sense	intron
chrI	2729264	A	ND	NA	intergenic
chrI	10820488	A	ND	NA	intergenic
chrI	14963461	A	ces-2	sense	intron
chrI	7970357	A	rbg-2	sense	intron
chrI	10819554	A	ND	NA	intergenic
chrI	2729286	A	ND	NA	intergenic
chrI	3167559	A	ND	NA	intergenic
chrI	13772106	A	ND	NA	intergenic
chrI	2717009	A	lin-17	sense	intron
chrI	13650	A	nlp-40	sense	intron
chrI	3167582	A	ND	NA	intergenic
chrI	3034468	A	Y54E10BR.2	sense	intron
chrI	11603302	A	ND	NA	intergenic
chrI	7970160	A	rbg-2	sense	intron
chrI	1359219	A	Y92H12BL.1	sense	intron
chrI	3167604	A	ND	NA	intergenic
chrI	3034492	A	Y54E10BR.2	sense	intron
chrI	1359229	A	Y92H12BL.1	sense	intron
chrI	3034494	A	Y54E10BR.2	sense	intron
chrI	6229375	A	T08B2.3	sense	intron
chrI	6212992	A	fars-1	antisense	intron
chrI	1359236	A	Y92H12BL.1	sense	intron
chrI	3167621	A	ND	NA	intergenic
chrI	3167625	A	ND	NA	intergenic
chrI	3034548	A	Y54E10BR.2	sense	intron
chrI	11603340	A	ND	NA	intergenic
chrI	1359250	A	Y92H12BL.1	sense	intron
chrI	1359251	A	Y92H12BL.1	sense	intron
chrI	1058198	A	vps-4	antisense	intron
chrI	1752471	A	Y71G12B.10	sense	intron
chrI	3034521	A	Y54E10BR.2	sense	intron
chrI	1359258	A	Y92H12BL.1	sense	intron
chrI	1359259	A	Y92H12BL.1	sense	intron
chrI	1359260	A	Y92H12BL.1	sense	intron
chrI	1359261	A	Y92H12BL.1	sense	intron
chrI	1359262	A	Y92H12BL.1	sense	intron
chrI	3255877	A	ND	NA	intergenic
chrI	3167648	A	ND	NA	intergenic
chrI	1359265	A	Y92H12BL.1	sense	intron
chrI	3167651	A	ND	NA	intergenic
chrI	138676	A	duox-2	sense	coding
chrI	3034549	A	Y54E10BR.2	sense	intron
chrI	2403766	A	zwl-1	sense	intron
chrI	6229436	A	T08B2.3	sense	intron
chrI	10820170	A	ND	NA	intergenic
chrI	3034559	A	Y54E10BR.2	sense	intron
chrI	2717128	A	lin-17	sense	intron
chrI	3034570	A	Y54E10BR.2	sense	intron
chrI	3034571	A	Y54E10BR.2	sense	intron
chrI	1697233	A	ND	NA	intergenic
chrI	13583609	A	ubc-14	sense	intron
chrI	630236	A	ND	NA	intergenic
chrI	11603425	A	ND	NA	intergenic
chrI	2616802	A	ctn-1	sense	intron
chrI	3230971	A	Y54E10A.3	sense	intron
chrI	12049893	A	ksr-2	antisense	intron
chrI	630250	A	ND	NA	intergenic
chrI	11603435	A	ND	NA	intergenic
chrI	3034607	A	Y54E10BR.2	sense	3utr
chrI	13772274	A	ND	NA	intergenic
chrI	11603445	A	ND	NA	intergenic
chrI	1359352	A	Y92H12BL.1	sense	intron
chrI	1359353	A	Y92H12BL.1	sense	intron
chrI	13772031	A	ND	NA	intergenic
chrI	13772288	A	ND	NA	intergenic
chrI	10457344	A	ND	NA	intergenic
chrI	1359362	A	Y92H12BL.1	sense	intron
chrI	1359363	A	Y92H12BL.1	sense	intron
chrI	3167751	A	dnc-6	sense	5utr
chrI	1359369	A	Y92H12BL.1	sense	intron
chrI	1359373	A	Y92H12BL.1	sense	intron
chrI	1359374	A	Y92H12BL.1	sense	intron
chrI	12809903	A	ND	NA	intergenic
chrI	3167763	A	dnc-6	sense	5utr
chrI	3507733	A	Y47G6A.7	sense	intron
chrI	13772311	A	ND	NA	intergenic
chrI	1359388	A	Y92H12BL.1	sense	intron
chrI	3167773	A	dnc-6	sense	5utr
chrI	3167775	A	dnc-6	sense	5utr
chrI	2733600	A	Y71F9B.2	sense	intron
chrI	3167778	A	dnc-6	sense	5utr
chrI	3167779	A	dnc-6	sense	5utr
chrI	5982471	A	C06A5.6	antisense	intron
chrI	3167794	A	dnc-6	sense	5utr
chrI	5132894	A	Y110A7A.6	sense	intron
chrI	6229257	A	T08B2.3	sense	intron
chrI	3231288	A	Y54E10A.3	sense	intron
chrI	1576506	A	src-1	sense	intron
chrI	3167806	A	dnc-6	sense	5utr
chrI	1359426	A	Y92H12BL.1	sense	3utr
chrI	3231301	A	Y54E10A.3	sense	intron
chrI	3167814	A	dnc-6	sense	5utr
chrI	1359431	A	Y92H12BL.1	sense	3utr
chrI	1359436	A	Y92H12BL.1	sense	3utr
chrI	5149624	A	ND	NA	intergenic
chrI	3167831	A	dnc-6	sense	5utr
chrI	1375836	A	Y92H12BL.5	sense	intron
chrI	1359460	A	Y92H12BL.1	sense	3utr
chrI	3167845	A	dnc-6	sense	5utr
chrI	3167846	A	dnc-6	sense	5utr
chrI	3167505	A	Y54E10A.6	sense	3utr
chrI	3362409	A	W05F2.8	sense	coding
chrI	1375851	A	Y92H12BL.5	sense	intron
chrI	3167852	A	dnc-6	sense	5utr
chrI	2082418	A	Y37E3.11	sense	intron
chrI	7003763	A	ND	NA	intergenic
chrI	1359476	A	Y92H12BL.1	sense	3utr
chrI	1359477	A	Y92H12BL.1	sense	3utr
chrI	2715254	A	lin-17	sense	intron
chrI	2926199	A	Y71F9AL.1	sense	intron
chrI	10819196	A	ND	NA	intergenic
chrI	10819198	A	ND	NA	intergenic
chrI	7003778	A	ND	NA	intergenic
chrI	1359492	A	Y92H12BL.1	sense	3utr
chrI	3167510	A	Y54E10A.6	sense	3utr
chrI	13959	A	nlp-40	sense	intron
chrI	1554057	A	Y92H12A.2	sense	intron
chrI	1359499	A	Y92H12BL.1	sense	3utr
chrI	5369489	A	F55A12.1	sense	intron
chrI	1359508	A	Y92H12BL.1	sense	3utr
chrI	10819221	A	ND	NA	intergenic
chrI	10819224	A	ND	NA	intergenic
chrI	1375897	A	ND	NA	intergenic
chrI	3167901	A	dnc-6	sense	5utr
chrI	1358789	A	Y92H12BL.1	sense	intron
chrI	10819682	A	ND	NA	intergenic
chrI	5369506	A	F55A12.1	sense	intron
chrI	5369507	A	F55A12.1	sense	intron
chrI	1375917	A	ND	NA	intergenic
chrI	1375918	A	ND	NA	intergenic
chrI	2926255	A	Y71F9AL.1	sense	intron
chrI	1375922	A	ND	NA	intergenic
chrI	6473395	A	K06A5.1	sense	intron
chrI	6473399	A	K06A5.1	sense	intron
chrI	11603640	A	ND	NA	intergenic
chrI	10819188	A	ND	NA	intergenic
chrI	3167861	A	dnc-6	sense	5utr
chrI	11228035	A	nfya-2	sense	intron
chrI	5369539	A	F55A12.1	sense	intron
chrI	10819268	A	ND	NA	intergenic
chrI	3167862	A	dnc-6	sense	5utr
chrI	2082503	A	Y37E3.11	sense	intron
chrI	3167863	A	dnc-6	sense	5utr
chrI	4703948	A	ND	NA	intergenic
chrI	2082517	A	Y37E3.11	sense	intron
chrI	2060580	A	ND	NA	intergenic
chrI	11337679	A	ND	NA	intergenic
chrI	10819296	A	ND	NA	intergenic
chrI	10819298	A	ND	NA	intergenic
chrI	1253092	A	Y48G8AL.1	sense	intron
chrI	1358801	A	Y92H12BL.1	sense	intron
chrI	1253097	A	Y48G8AL.1	sense	intron
chrI	1375978	A	ND	NA	intergenic
chrI	2715374	A	lin-17	sense	intron
chrI	12926704	A	ND	NA	intergenic
chrI	6473461	A	K06A5.1	sense	intron
chrI	6473462	A	K06A5.1	sense	intron
chrI	2076412	A	Y37E3.10	sense	intron
chrI	2930429	A	nxt-1	sense	intron
chrI	2076415	A	Y37E3.10	sense	intron
chrI	1376000	A	ND	NA	intergenic
chrI	2408194	A	zwl-1	sense	intron
chrI	13584411	A	ubc-14	sense	intron
chrI	2076420	A	Y37E3.10	sense	intron
chrI	10819710	A	ND	NA	intergenic
chrI	2715403	A	lin-17	sense	intron
chrI	10819341	A	ND	NA	intergenic
chrI	10819343	A	ND	NA	intergenic
chrI	10819344	A	ND	NA	intergenic
chrI	1376216	A	ND	NA	intergenic
chrI	2930451	A	nxt-1	sense	intron
chrI	6473492	A	K06A5.1	sense	intron
chrI	10819350	A	ND	NA	intergenic
chrI	2715416	A	lin-17	sense	intron
chrI	2144026	A	Y37E3.17	sense	intron
chrI	1376030	A	ND	NA	intergenic
chrI	2930464	A	nxt-1	sense	intron
chrI	2930465	A	nxt-1	sense	intron
chrI	1376036	A	ND	NA	intergenic
chrI	14649125	A	bath-40	sense	intron
chrI	1376045	A	ND	NA	intergenic
chrI	1376046	A	ND	NA	intergenic
chrI	14649148	A	bath-40	sense	intron
chrI	6473539	A	K06A5.1	sense	intron
chrI	2056502	A	ND	NA	intergenic
chrI	7003974	A	ND	NA	intergenic
chrI	2076489	A	Y37E3.10	sense	intron
chrI	6473548	A	K06A5.1	sense	intron
chrI	2076642	A	Y37E3.10	sense	intron
chrI	143187	A	duox-2	sense	coding
chrI	5111640	A	Y110A7A.15	antisense	intron
chrI	6473561	A	K06A5.1	sense	intron
chrI	10819419	A	ND	NA	intergenic
chrI	7003997	A	ND	NA	intergenic
chrI	12926681	A	ND	NA	intergenic
chrI	1376109	A	ND	NA	intergenic
chrI	1259375	A	ND	NA	intergenic
chrI	6514545	A	glh-2	sense	coding
chrI	10819443	A	ND	NA	intergenic
chrI	1376123	A	ND	NA	intergenic
chrI	1566588	A	ND	NA	intergenic
chrI	10819453	A	ND	NA	intergenic
chrI	2082694	A	Y37E3.11	sense	intron
chrI	2082698	A	Y37E3.11	sense	intron
chrI	10819469	A	ND	NA	intergenic
chrI	1376142	A	ND	NA	intergenic
chrI	2082703	A	Y37E3.11	sense	intron
chrI	10819473	A	ND	NA	intergenic
chrI	2926233	A	Y71F9AL.1	sense	intron
chrI	13485977	A	Y48G10A.2	antisense	intron
chrI	10774429	A	daf-16	sense	intron
chrI	622496	A	F56A6.4	antisense	intron
chrI	3167558	A	ND	NA	intergenic
chrI	10819569	A	ND	NA	intergenic
chrI	1576883	A	src-1	sense	intron
chrI	10819508	A	ND	NA	intergenic
chrI	2076610	A	Y37E3.10	sense	intron
chrI	2084804	A	Y37E3.11	sense	intron
chrI	2076613	A	Y37E3.10	sense	intron
chrI	12749132	A	ND	NA	intergenic
chrI	5369804	A	F55A12.1	sense	coding
chrI	10819533	A	ND	NA	intergenic
chrI	10819303	A	ND	NA	intergenic
chrI	2930645	A	nxt-1	sense	intron
chrI	2930646	A	nxt-1	sense	intron
chrI	2076632	A	Y37E3.10	sense	intron
chrI	2076633	A	Y37E3.10	sense	intron
chrI	1376219	A	ND	NA	intergenic
chrI	12748765	A	ND	NA	intergenic
chrI	1376226	A	ND	NA	intergenic
chrI	2076643	A	Y37E3.10	sense	intron
chrI	2734052	A	Y71F9B.2	sense	intron
chrI	2076647	A	Y37E3.10	sense	intron
chrI	2076648	A	Y37E3.10	sense	intron
chrI	5789678	A	cpb-3	antisense	intron
chrI	2930673	A	nxt-1	sense	intron
chrI	10819573	A	ND	NA	intergenic
chrI	1576950	A	src-1	sense	intron
chrI	10819575	A	ND	NA	intergenic
chrI	5149882	A	ND	NA	intergenic
chrI	2734075	A	Y71F9B.2	sense	intron
chrI	2734076	A	Y71F9B.2	sense	intron
chrI	13486077	A	Y48G10A.2	antisense	intron
chrV	19927041	T	ND	NA	intergenic
chrV	3749890	T	ND	NA	intergenic
chrV	3749892	T	ND	NA	intergenic
chrV	3749895	T	ND	NA	intergenic
chrV	19927383	T	ND	NA	intergenic
chrV	11325462	T	F47G9.1	antisense	intron
chrV	8470553	T	T23B12.8	antisense	intron
chrV	13135898	T	clec-41	antisense	3utr
chrV	13135899	T	clec-41	antisense	3utr
chrV	13135900	T	clec-41	antisense	3utr
chrV	13135901	T	clec-41	antisense	3utr
chrV	17942566	T	dpy-21	antisense	intron
chrV	2031655	T	ND	NA	intergenic
chrV	7217196	T	C13F10.5	antisense	intron
chrV	3749939	T	ND	NA	intergenic
[truncated: 1,885 more rows]

## Sheet: 3'UTR non-repetitive editing 
Chromosome name	Position in chromosome	Nucleotide changed	Gene name in region	Orientation of the gene
chrI	10020137	A	F10G8.1	sense
chrI	10639322	T	cdc-26	antisense
chrI	11013363	A	Y52B11A.12	sense
chrI	11335810	A	M04D5.1	sense
chrI	11924781	T	wve-1	antisense
chrI	11924782	T	wve-1	antisense
chrI	11925190	T	wve-1	antisense
chrI	1358481	A	Y92H12BL.1	sense
chrI	1358491	A	Y92H12BL.1	sense
chrI	1358496	A	Y92H12BL.1	sense
chrI	1358503	A	Y92H12BL.1	sense
chrI	1358504	A	Y92H12BL.1	sense
chrI	1358506	A	Y92H12BL.1	sense
chrI	1358516	A	Y92H12BL.1	sense
chrI	1358517	A	Y92H12BL.1	sense
chrI	1359426	A	Y92H12BL.1	sense
chrI	1359431	A	Y92H12BL.1	sense
chrI	1359436	A	Y92H12BL.1	sense
chrI	1359460	A	Y92H12BL.1	sense
chrI	1359476	A	Y92H12BL.1	sense
chrI	1359477	A	Y92H12BL.1	sense
chrI	1359479	A	Y92H12BL.1	sense
chrI	1359492	A	Y92H12BL.1	sense
chrI	1359499	A	Y92H12BL.1	sense
chrI	1359508	A	Y92H12BL.1	sense
chrI	2033869	A	Y20F4.2	sense
chrI	2033881	A	Y20F4.2	sense
chrI	2033884	A	Y20F4.2	sense
chrI	2033891	A	Y20F4.2	sense
chrI	2033896	A	Y20F4.2	sense
chrI	2033914	A	Y20F4.2	sense
chrI	2076705	A	Y37E3.10	sense
chrI	2076769	A	Y37E3.10	sense
chrI	3034607	A	Y54E10BR.2	sense
chrI	3167505	A	Y54E10A.6	sense
chrI	3167510	A	Y54E10A.6	sense
chrI	3167523	A	Y54E10A.6	sense
chrI	3167527	A	Y54E10A.6	sense
chrI	3167530	A	Y54E10A.6	sense
chrI	3167534	A	Y54E10A.6	sense
chrI	7208224	T	C01H6.3	antisense
chrI	7640346	T	F26A3.1	antisense
chrI	7701396	T	T23G11.1	antisense
chrI	9020271	A	F36F2.1	sense
chrII	10787997	T	vps-11	antisense
chrII	10788145	T	vps-11	antisense
chrII	10788195	T	vps-11	antisense
chrII	13485730	A	E01G4.6	sense
chrII	14065926	A	lem-2	sense
chrII	14065966	A	lem-2	sense
chrII	14065977	A	lem-2	sense
chrII	14066000	A	lem-2	sense
chrII	14066005	A	lem-2	sense
chrII	14066016	A	lem-2	sense
chrII	14066053	A	lem-2	sense
chrII	14066054	A	lem-2	sense
chrII	14066055	A	lem-2	sense
chrII	14869458	A	R05H10.5	sense
chrII	14986824	A	Y53F4B.6	sense
chrII	2290917	T	K09F6.7	antisense
chrII	3210773	A	ZC239.6	sense
chrII	3210836	A	ZC239.6	sense
chrII	3210860	A	ZC239.6	sense
chrII	3210861	A	ZC239.6	sense
chrII	3210877	A	ZC239.6	sense
chrII	3210905	A	ZC239.6	sense
chrII	3210913	A	ZC239.6	sense
chrII	3210979	A	ZC239.6	sense
chrII	3210987	A	ZC239.6	sense
chrII	3211066	A	ZC239.6	sense
chrII	3211125	A	ZC239.6	sense
chrII	3211126	A	ZC239.6	sense
chrII	3211163	A	ZC239.6	sense
chrII	3211182	A	ZC239.6	sense
chrII	3211185	A	ZC239.6	sense
chrII	3211193	A	ZC239.6	sense
chrII	3211205	A	ZC239.6	sense
chrII	3211243	A	ZC239.6	sense
chrII	3320385	A	F39E9.22	sense
chrII	3320389	A	F39E9.22	sense
chrII	3320391	A	F39E9.22	sense
chrII	3321071	T	Y46D2A.5	antisense
chrII	3321121	T	Y46D2A.5	antisense
chrII	431708	A	C24H12.3	sense
chrII	431709	A	C24H12.3	sense
chrII	431711	A	C24H12.3	sense
chrII	431837	A	C24H12.3	sense
chrII	431838	A	C24H12.3	sense
chrII	431857	A	C24H12.3	sense
chrII	431901	A	C24H12.3	sense
chrII	432453	A	C24H12.3	sense
chrII	432475	A	C24H12.3	sense
chrII	432476	A	C24H12.3	sense
chrII	432477	A	C24H12.3	sense
chrII	432519	A	C24H12.3	sense
chrII	432534	A	C24H12.3	sense
chrII	432549	A	C24H12.3	sense
chrII	432569	A	C24H12.3	sense
chrII	432577	A	C24H12.3	sense
chrII	432578	A	C24H12.3	sense
chrII	432663	A	C24H12.3	sense
chrII	432670	A	C24H12.3	sense
chrII	432682	A	C24H12.3	sense
chrII	432707	A	C24H12.3	sense
chrII	432719	A	C24H12.3	sense
chrII	5596421	A	C17G10.2	sense
chrII	5712324	A	C18A3.4	sense
chrII	5721775	T	rab-3	antisense
chrII	7024847	A	C52E12.6	sense
chrII	964156	A	C32B5.7	sense
chrIII	1031622	T	chin-1	antisense
chrIII	10475479	A	cul-1	sense
chrIII	10475480	A	cul-1	sense
chrIII	12671331	T	taf-7.2	antisense
chrIII	12671333	T	taf-7.2	antisense
chrIII	12671336	T	taf-7.2	antisense
chrIII	12671339	T	taf-7.2	antisense
chrIII	12671341	T	taf-7.2	antisense
chrIII	13020124	A	col-98	sense
chrIII	13508519	A	T28A8.3	sense
chrIII	13508525	A	T28A8.3	sense
chrIII	13508537	A	T28A8.3	sense
chrIII	13780973	A	pot-3	sense
chrIII	1555567	T	Y67D2.7	antisense
chrIII	1555574	T	Y67D2.7	antisense
chrIII	1555715	T	Y67D2.7	antisense
chrIII	1555716	T	Y67D2.7	antisense
chrIII	1555757	T	Y67D2.7	antisense
chrIII	4958495	T	C27F2.4	antisense
chrIII	5459443	A	F48E8.4	sense
chrIII	5459461	A	F48E8.4	sense
chrIII	5459462	A	F48E8.4	sense
chrIII	5459503	A	F48E8.4	sense
chrIII	5459514	A	F48E8.4	sense
chrIII	5459515	A	F48E8.4	sense
chrIII	5459516	A	F48E8.4	sense
chrIII	5459535	A	F48E8.4	sense
chrIII	5459542	A	F48E8.4	sense
chrIII	5459546	A	F48E8.4	sense
chrIII	5459547	A	F48E8.4	sense
chrIII	5459550	A	F48E8.4	sense
chrIII	5459556	A	F48E8.4	sense
chrIII	5459557	A	F48E8.4	sense
chrIII	5459559	A	F48E8.4	sense
chrIII	5459561	A	F48E8.4	sense
chrIII	5459576	A	F48E8.4	sense
chrIII	5459583	A	F48E8.4	sense
chrIII	5459585	A	F48E8.4	sense
chrIII	5459586	A	F48E8.4	sense
chrIII	5459598	A	F48E8.4	sense
chrIII	5459612	A	F48E8.4	sense
chrIII	5459615	A	F48E8.4	sense
chrIII	5459616	A	F48E8.4	sense
chrIII	5459617	A	F48E8.4	sense
chrIII	5459624	A	F48E8.4	sense
chrIII	5459629	A	F48E8.4	sense
chrIII	861199	A	exos-4.2	sense
chrIII	861212	A	exos-4.2	sense
chrIII	861237	A	exos-4.2	sense
chrIII	9060138	T	lin-12	antisense
chrIII	9505498	A	lrg-1	sense
chrIII	9505504	A	lrg-1	sense
chrIV	10914483	A	ZK593.2	sense
chrIV	1201513	A	Y104H12D.3	sense
chrIV	1201518	A	Y104H12D.3	sense
chrIV	1201655	A	Y104H12D.3	sense
chrIV	1201656	A	Y104H12D.3	sense
chrIV	17104308	T	sfa-1	antisense
chrIV	17104358	T	sfa-1	antisense
chrIV	17104365	T	sfa-1	antisense
chrIV	17104376	T	sfa-1	antisense
chrIV	17104383	T	sfa-1	antisense
chrIV	192136	A	pnc-1	sense
chrIV	3525893	A	unc-33	sense
chrIV	651964	T	K11H12.1	antisense
chrIV	8022667	T	nhr-31	antisense
chrV	11625928	T	F35B12.10	antisense
chrV	11731107	T	npp-22	antisense
chrV	12724589	T	R11D1.12	antisense
chrV	1289391	T	egl-2	antisense
chrV	1289393	T	egl-2	antisense
chrV	1289394	T	egl-2	antisense
chrV	1289404	T	egl-2	antisense
chrV	1289407	T	egl-2	antisense
chrV	1289428	T	egl-2	antisense
chrV	1289447	T	egl-2	antisense
chrV	1289468	T	egl-2	antisense
chrV	1289479	T	egl-2	antisense
chrV	1289485	T	egl-2	antisense
chrV	1289486	T	egl-2	antisense
chrV	1289496	T	egl-2	antisense
chrV	1289508	T	egl-2	antisense
chrV	1289518	T	egl-2	antisense
chrV	13135017	T	clec-41	antisense
chrV	13135018	T	clec-41	antisense
chrV	13135027	T	clec-41	antisense
chrV	13135028	T	clec-41	antisense
chrV	13135898	T	clec-41	antisense
chrV	13135899	T	clec-41	antisense
chrV	13135900	T	clec-41	antisense
chrV	13135901	T	clec-41	antisense
chrV	18407648	A	ZK262.12	sense
chrV	19921766	T	Y60A3A.16	antisense
chrV	2779224	A	srj-17	sense
chrV	4129237	A	T05B4.4	sense
chrV	4129365	A	T05B4.4	sense
chrV	4129410	A	T05B4.4	sense
chrV	4134915	A	nhr-57	sense
chrV	4628303	A	F54D11.2	sense
chrV	4628304	A	F54D11.2	sense
chrV	4628305	A	F54D11.2	sense
chrV	5537645	A	syp-2	sense
chrV	6716230	A	W02F12.1	sense
chrV	8855223	T	F07B7.12	antisense
chrV	8855224	T	F07B7.12	antisense
chrX	1011618	A	rncs-1	sense
chrX	1011665	A	rncs-1	sense
chrX	1011685	A	rncs-1	sense
chrX	1011687	A	rncs-1	sense
chrX	11581365	A	frm-3	sense
chrX	13336261	A	F46G10.4	sense
chrX	13336279	A	F46G10.4	sense
chrX	13336280	A	F46G10.4	sense
chrX	13336281	A	F46G10.4	sense
chrX	13336290	A	F46G10.4	sense
chrX	13336292	A	F46G10.4	sense
chrX	13336306	A	F46G10.4	sense
chrX	13336307	A	F46G10.4	sense
chrX	13336310	A	F46G10.4	sense
chrX	13336331	A	F46G10.4	sense
chrX	13336332	A	F46G10.4	sense
chrX	13336370	A	F46G10.4	sense
chrX	13336384	A	F46G10.4	sense
chrX	13336553	A	F46G10.4	sense
chrX	13336585	A	F46G10.4	sense
chrX	13336587	A	F46G10.4	sense
chrX	13336601	A	F46G10.4	sense
chrX	13336609	A	F46G10.4	sense
chrX	13336613	A	F46G10.4	sense
chrX	13336622	A	F46G10.4	sense
chrX	13336626	A	F46G10.4	sense
chrX	13336640	A	F46G10.4	sense
chrX	13336650	A	F46G10.4	sense
chrX	13336657	A	F46G10.4	sense
chrX	13336659	A	F46G10.4	sense
chrX	13336660	A	F46G10.4	sense
chrX	13418145	A	C29F7.2	sense
chrX	15369950	T	tag-97	antisense
chrX	15546605	A	olrn-1	sense
chrX	15671922	A	F59D12.1	sense
chrX	16866001	T	aakg-2	antisense
chrX	17555262	T	F31A3.5	antisense
chrX	3728393	A	nlp-1	sense
chrX	3970277	A	C16B8.t3	sense
chrX	4972538	T	ZC8.6	antisense
chrX	5886790	A	flp-7	sense
chrX	5945830	T	mig-23	antisense
chrX	7151469	A	C54D1.9	sense
