# Supplementary material for: A-to-I RNA editing promotes developmental stage–specific gene and lncRNA expression
Source: HighWire-hosted journal article supplement (doi:10.1101/gr.211169.116), 2016-12-28
Supplement: Supplemental_Table_S3.xlsx [file Supplemental_Table_S3.xlsx]

## Sheet: Novel sites in all data
Novel sites found in this study				overlap sites with (Zhao et al., 2015; Washburn et al., 2014; Whipple et al., 2015)				Sites not found by this study
Chromosome name	Position in chromosome	Gene name in region		Chromosome name	Position in chromosome	Gene name in region		Chromosome name	Position in chromosome	Gene name in region
chrI	2098			chrI	11904	Y74C9A.2		chrI	2196
chrI	2301			chrI	11905	Y74C9A.2		chrI	2198
chrI	2311			chrI	11917	Y74C9A.2		chrI	2200
chrI	2336			chrI	11938	Y74C9A.2		chrI	2202
chrI	2428			chrI	13650	Y74C9A.2		chrI	2207
chrI	3276			chrI	14749	Y74C9A.2		chrI	2208
chrI	3282			chrI	30811	Y74C9A.5		chrI	2209
chrI	3335			chrI	70739			chrI	2210
chrI	3369			chrI	104828	Y48G1C.8		chrI	2221
chrI	3404			chrI	104867	Y48G1C.8		chrI	3251
chrI	3423			chrI	184321			chrI	3253
chrI	3607			chrI	184331			chrI	3745
chrI	3639			chrI	184344			chrI	4672	Y74C9A.3
chrI	4495	Y74C9A.3		chrI	184395			chrI	9421	Y74C9A.3
chrI	4523	Y74C9A.3		chrI	184403			chrI	9422	Y74C9A.3
chrI	7223	Y74C9A.3		chrI	184434			chrI	9425	Y74C9A.3
chrI	7344	Y74C9A.3		chrI	184978			chrI	9440	Y74C9A.3
chrI	12282	Y74C9A.2		chrI	184979			chrI	9445	Y74C9A.3
chrI	12303	Y74C9A.2		chrI	185045			chrI	9446	Y74C9A.3
chrI	12315	Y74C9A.2		chrI	185056			chrI	9460	Y74C9A.3
chrI	12316	Y74C9A.2		chrI	198802	K10E9.1		chrI	9461	Y74C9A.3
chrI	13607	Y74C9A.2		chrI	206059	Y48G1BL.2		chrI	10813	Y74C9A.2
chrI	13616	Y74C9A.2		chrI	294783	C53D5.1		chrI	11919	Y74C9A.2
chrI	13641	Y74C9A.2		chrI	294813	C53D5.1		chrI	11933	Y74C9A.2
chrI	13953	Y74C9A.2		chrI	294858	C53D5.1		chrI	11941	Y74C9A.2
chrI	13959	Y74C9A.2		chrI	294868	C53D5.1		chrI	11942	Y74C9A.2
chrI	13960	Y74C9A.2		chrI	294870	C53D5.1		chrI	11946	Y74C9A.2
chrI	14834	Y74C9A.2		chrI	309839	C53D5.5		chrI	11956	Y74C9A.2
chrI	14835	Y74C9A.2		chrI	309850	C53D5.5		chrI	11959	Y74C9A.2
chrI	15540	Y74C9A.2		chrI	309862	C53D5.5		chrI	11960	Y74C9A.2
chrI	15541	Y74C9A.2		chrI	309882	C53D5.5		chrI	11961	Y74C9A.2
chrI	15565	Y74C9A.2		chrI	309885	C53D5.5		chrI	11966	Y74C9A.2
chrI	15577	Y74C9A.2		chrI	309908	C53D5.5		chrI	11967	Y74C9A.2
chrI	15581	Y74C9A.2		chrI	309916	C53D5.5		chrI	11969	Y74C9A.2
chrI	15736	Y74C9A.2		chrI	318317			chrI	11972	Y74C9A.2
chrI	21142	Y74C9A.4		chrI	318467			chrI	11977	Y74C9A.2
chrI	27655	Y74C9A.5		chrI	318468			chrI	11980	Y74C9A.2
chrI	31038	Y74C9A.5		chrI	336485	Y48G1A.3		chrI	11982	Y74C9A.2
chrI	31039	Y74C9A.5		chrI	336517	Y48G1A.3		chrI	11986	Y74C9A.2
chrI	51466	Y48G1C.4		chrI	336518	Y48G1A.3		chrI	11990	Y74C9A.2
chrI	51478	Y48G1C.4		chrI	336525	Y48G1A.3		chrI	11996	Y74C9A.2
chrI	51481	Y48G1C.4		chrI	336526	Y48G1A.3		chrI	11997	Y74C9A.2
chrI	51560	Y48G1C.4		chrI	336606	Y48G1A.3		chrI	11999	Y74C9A.2
chrI	51562	Y48G1C.4		chrI	336616	Y48G1A.3		chrI	12000	Y74C9A.2
chrI	51633	Y48G1C.4		chrI	344729	Y48G1A.6		chrI	12004	Y74C9A.2
chrI	51648	Y48G1C.4		chrI	389919	R119.5		chrI	12009	Y74C9A.2
chrI	51651	Y48G1C.4		chrI	396240			chrI	12010	Y74C9A.2
chrI	51658	Y48G1C.4		chrI	396254			chrI	12011	Y74C9A.2
chrI	51659	Y48G1C.4		chrI	409063	Y50C1A.1		chrI	12012	Y74C9A.2
chrI	51662	Y48G1C.4		chrI	411656	Y50C1A.1		chrI	12015	Y74C9A.2
chrI	51667	Y48G1C.4		chrI	431635			chrI	12016	Y74C9A.2
chrI	51669	Y48G1C.4		chrI	431636			chrI	12017	Y74C9A.2
chrI	51671	Y48G1C.4		chrI	431648			chrI	12018	Y74C9A.2
chrI	51683	Y48G1C.4		chrI	504540	Y65B4BL.4		chrI	12020	Y74C9A.2
chrI	51684	Y48G1C.4		chrI	505327	Y65B4BL.4		chrI	12021	Y74C9A.2
chrI	51686	Y48G1C.4		chrI	517115			chrI	12025	Y74C9A.2
chrI	51689	Y48G1C.4		chrI	517226			chrI	12035	Y74C9A.2
chrI	51702	Y48G1C.4		chrI	517259			chrI	12036	Y74C9A.2
chrI	51704	Y48G1C.4		chrI	517260			chrI	12037	Y74C9A.2
chrI	51713	Y48G1C.4		chrI	517261			chrI	12041	Y74C9A.2
chrI	51714	Y48G1C.4		chrI	517539			chrI	12042	Y74C9A.2
chrI	51745	Y48G1C.4		chrI	538370	Y65B4BR.4		chrI	12043	Y74C9A.2
chrI	51746	Y48G1C.4		chrI	538412	Y65B4BR.4		chrI	12048	Y74C9A.2
chrI	51753	Y48G1C.4		chrI	538565	Y65B4BR.4		chrI	12049	Y74C9A.2
chrI	51760	Y48G1C.4		chrI	554786	Y65B4BR.3		chrI	12050	Y74C9A.2
chrI	51763	Y48G1C.4		chrI	615458	F56A6.4		chrI	12052	Y74C9A.2
chrI	51772	Y48G1C.4		chrI	615463	F56A6.4		chrI	12053	Y74C9A.2
chrI	51773	Y48G1C.4		chrI	622487	F56A6.4		chrI	12171	Y74C9A.2
chrI	51784	Y48G1C.4		chrI	622496	F56A6.4		chrI	12173	Y74C9A.2
chrI	51793	Y48G1C.4		chrI	622497	F56A6.4		chrI	12176	Y74C9A.2
chrI	51794	Y48G1C.4		chrI	622513	F56A6.4		chrI	12177	Y74C9A.2
chrI	51797	Y48G1C.4		chrI	622540	F56A6.4		chrI	12184	Y74C9A.2
chrI	51806	Y48G1C.4		chrI	622545	F56A6.4		chrI	12191	Y74C9A.2
chrI	51809	Y48G1C.4		chrI	622554	F56A6.4		chrI	12199	Y74C9A.2
chrI	51810	Y48G1C.4		chrI	622581	F56A6.4		chrI	12200	Y74C9A.2
chrI	51855	Y48G1C.4		chrI	622583	F56A6.4		chrI	12202	Y74C9A.2
chrI	51856	Y48G1C.4		chrI	622590	F56A6.4		chrI	12203	Y74C9A.2
chrI	51868	Y48G1C.4		chrI	622592	F56A6.4		chrI	12204	Y74C9A.2
chrI	51870	Y48G1C.4		chrI	622667	F56A6.4		chrI	12208	Y74C9A.2
chrI	51871	Y48G1C.4		chrI	622679	F56A6.4		chrI	12209	Y74C9A.2
chrI	51893	Y48G1C.4		chrI	622690	F56A6.4		chrI	12210	Y74C9A.2
chrI	51906	Y48G1C.4		chrI	622821	F56A6.4		chrI	12226	Y74C9A.2
chrI	51970	Y48G1C.4		chrI	622831	F56A6.4		chrI	12227	Y74C9A.2
chrI	51971	Y48G1C.4		chrI	622854	F56A6.4		chrI	12234	Y74C9A.2
chrI	51981	Y48G1C.4		chrI	622863	F56A6.4		chrI	12243	Y74C9A.2
chrI	51983	Y48G1C.4		chrI	622928	F56A6.4		chrI	12247	Y74C9A.2
chrI	51994	Y48G1C.4		chrI	622929	F56A6.4		chrI	12248	Y74C9A.2
chrI	51996	Y48G1C.4		chrI	622930	F56A6.4		chrI	12251	Y74C9A.2
chrI	52006	Y48G1C.4		chrI	622935	F56A6.4		chrI	12254	Y74C9A.2
chrI	52007	Y48G1C.4		chrI	622939	F56A6.4		chrI	13626	Y74C9A.2
chrI	52017	Y48G1C.4		chrI	622968	F56A6.4		chrI	13630	Y74C9A.2
chrI	52030	Y48G1C.4		chrI	622969	F56A6.4		chrI	13631	Y74C9A.2
chrI	52034	Y48G1C.4		chrI	623002	F56A6.4		chrI	13982	Y74C9A.2
chrI	52041	Y48G1C.4		chrI	623003	F56A6.4		chrI	13999	Y74C9A.2
chrI	52042	Y48G1C.4		chrI	623028	F56A6.4		chrI	14725	Y74C9A.2
chrI	52046	Y48G1C.4		chrI	629690			chrI	14731	Y74C9A.2
chrI	52047	Y48G1C.4		chrI	629691			chrI	14833	Y74C9A.2
chrI	52048	Y48G1C.4		chrI	629692			chrI	14850	Y74C9A.2
chrI	52067	Y48G1C.4		chrI	629697			chrI	14851	Y74C9A.2
chrI	52070	Y48G1C.4		chrI	629716			chrI	14856	Y74C9A.2
chrI	52079	Y48G1C.4		chrI	629717			chrI	14863	Y74C9A.2
chrI	52080	Y48G1C.4		chrI	629731			chrI	14865	Y74C9A.2
chrI	52082	Y48G1C.4		chrI	629759			chrI	14866	Y74C9A.2
chrI	52083	Y48G1C.4		chrI	629771			chrI	14867	Y74C9A.2
chrI	52084	Y48G1C.4		chrI	629779			chrI	15029	Y74C9A.2
chrI	52090	Y48G1C.4		chrI	629783			chrI	15060	Y74C9A.2
chrI	52095	Y48G1C.4		chrI	629784			chrI	15176	Y74C9A.2
chrI	66856			chrI	629789			chrI	15809	Y74C9A.2
chrI	70561			chrI	629790			chrI	15820	Y74C9A.2
chrI	70566			chrI	629796			chrI	15821	Y74C9A.2
chrI	70573			chrI	629803			chrI	15822	Y74C9A.2
chrI	70582			chrI	629807			chrI	15823	Y74C9A.2
chrI	78051	Y48G1C.2		chrI	629809			chrI	19070	Y74C9A.4
chrI	88186	Y48G1C.11		chrI	629810			chrI	19086	Y74C9A.4
chrI	88187	Y48G1C.11		chrI	629815			chrI	20418	Y74C9A.4
chrI	100755	Y48G1C.7		chrI	629824			chrI	26414	Y74C9A.4
chrI	100762	Y48G1C.7		chrI	629830			chrI	26415	Y74C9A.4
chrI	105130	Y48G1C.8		chrI	629835			chrI	30788	Y74C9A.5
chrI	113237	F53G12.13		chrI	629836			chrI	30833	Y74C9A.5
chrI	113421	F53G12.13		chrI	629846			chrI	35853
chrI	113424	F53G12.13		chrI	629887			chrI	37713
chrI	115148			chrI	629924			chrI	50667	Y48G1C.4
chrI	115158			chrI	629937			chrI	54969
chrI	115170			chrI	630079			chrI	54971
chrI	115171			chrI	630083			chrI	58670	Y48G1C.5
chrI	115315			chrI	630084			chrI	58671	Y48G1C.5
chrI	115323			chrI	630088			chrI	58681	Y48G1C.5
chrI	115324			chrI	630094			chrI	58696	Y48G1C.5
chrI	115328			chrI	630147			chrI	58697	Y48G1C.5
chrI	115336			chrI	630152			chrI	58708	Y48G1C.5
chrI	115340			chrI	630154			chrI	58709	Y48G1C.5
chrI	115349			chrI	630170			chrI	58742	Y48G1C.5
chrI	115356			chrI	630176			chrI	70721
chrI	117684			chrI	630180			chrI	70726
chrI	134265	F53G12.5		chrI	630227			chrI	70731
chrI	136954	F53G12.4		chrI	630262			chrI	70740
chrI	136957	F53G12.4		chrI	630263			chrI	70753
chrI	136958	F53G12.4		chrI	630264			chrI	70765
chrI	136971	F53G12.4		chrI	630278			chrI	71065
chrI	136977	F53G12.4		chrI	630290			chrI	71066
chrI	136980	F53G12.4		chrI	630293			chrI	72748	Y48G1C.2
chrI	136981	F53G12.4		chrI	630398			chrI	72754	Y48G1C.2
chrI	137007	F53G12.4		chrI	630409			chrI	72799	Y48G1C.2
chrI	137028	F53G12.4		chrI	630412			chrI	74446	Y48G1C.2
chrI	137032	F53G12.4		chrI	630413			chrI	74457	Y48G1C.2
chrI	137034	F53G12.4		chrI	630415			chrI	74717	Y48G1C.2
chrI	138676	F53G12.3		chrI	630442			chrI	75349	Y48G1C.2
chrI	141759	F53G12.3		chrI	630456			chrI	75363	Y48G1C.2
chrI	143187	F53G12.3		chrI	630472			chrI	76208	Y48G1C.2
chrI	184433			chrI	630504			chrI	77137	Y48G1C.2
chrI	184951			chrI	630506			chrI	81249	Y48G1C.10
chrI	184957			chrI	630507			chrI	81257	Y48G1C.10
chrI	185022			chrI	630536			chrI	81262	Y48G1C.10
chrI	185036			chrI	630548			chrI	81269	Y48G1C.10
chrI	185071			chrI	630550			chrI	81270	Y48G1C.10
chrI	185076			chrI	630561			chrI	81271	Y48G1C.10
chrI	185218			chrI	630573			chrI	84881
chrI	185961			chrI	630574			chrI	90488	Y48G1C.11
chrI	185975			chrI	630583			chrI	91494	Y48G1C.9
chrI	185984			chrI	630593			chrI	91515	Y48G1C.9
chrI	186028			chrI	630594			chrI	97725	Y48G1C.7
chrI	186043			chrI	630595			chrI	97769	Y48G1C.7
chrI	186046			chrI	630609			chrI	97787	Y48G1C.7
chrI	186051			chrI	630612			chrI	97920	Y48G1C.7
chrI	186052			chrI	630622			chrI	98566	Y48G1C.7
chrI	186068			chrI	630627			chrI	102538	Y48G1C.8
chrI	186069			chrI	630628			chrI	102587	Y48G1C.8
chrI	188506			chrI	630636			chrI	102796	Y48G1C.8
chrI	188524			chrI	630652			chrI	102864	Y48G1C.8
chrI	188535			chrI	630656			chrI	102870	Y48G1C.8
chrI	189206	K10E9.1		chrI	630663			chrI	103140	Y48G1C.8
chrI	198344	K10E9.1		chrI	630665			chrI	104821	Y48G1C.8
chrI	198345	K10E9.1		chrI	630673			chrI	104822	Y48G1C.8
chrI	198356	K10E9.1		chrI	630674			chrI	104853	Y48G1C.8
chrI	198792	K10E9.1		chrI	630686			chrI	104854	Y48G1C.8
chrI	198815	K10E9.1		chrI	630687			chrI	104872	Y48G1C.8
chrI	198820	K10E9.1		chrI	630697			chrI	115122
chrI	211670	Y48G1BL.7		chrI	630743			chrI	115127
chrI	213852	Y48G1BL.3		chrI	630753			chrI	115138
chrI	217005	Y48G1BL.1		chrI	630754			chrI	115149
chrI	217069	Y48G1BL.1		chrI	630762			chrI	116496	F53G12.7
chrI	217083	Y48G1BL.1		chrI	630790			chrI	116531	F53G12.7
chrI	217086	Y48G1BL.1		chrI	630791			chrI	116547	F53G12.7
chrI	217088	Y48G1BL.1		chrI	630801			chrI	116572	F53G12.7
chrI	217097	Y48G1BL.1		chrI	630829			chrI	116617	F53G12.7
chrI	217098	Y48G1BL.1		chrI	630830			chrI	117170	F53G12.7
chrI	217102	Y48G1BL.1		chrI	630831			chrI	126901
chrI	217107	Y48G1BL.1		chrI	630845			chrI	126903
chrI	217111	Y48G1BL.1		chrI	630849			chrI	126935
chrI	217112	Y48G1BL.1		chrI	630850			chrI	128971	F53G12.5
chrI	217137	Y48G1BL.1		chrI	630853			chrI	129091	F53G12.5
chrI	217146	Y48G1BL.1		chrI	630874			chrI	129186	F53G12.5
chrI	217434	Y48G1BL.1		chrI	630875			chrI	129266	F53G12.5
chrI	217453	Y48G1BL.1		chrI	630898			chrI	129289	F53G12.5
chrI	217458	Y48G1BL.1		chrI	630923			chrI	132536	F53G12.5
chrI	217466	Y48G1BL.1		chrI	630984			chrI	132539	F53G12.5
chrI	217467	Y48G1BL.1		chrI	631004			chrI	133557	F53G12.5
chrI	217475	Y48G1BL.1		chrI	631012			chrI	139541	F53G12.3
chrI	217491	Y48G1BL.1		chrI	633311	Y65B4A.6		chrI	139572	F53G12.3
chrI	217498	Y48G1BL.1		chrI	633324	Y65B4A.6		chrI	139810	F53G12.3
chrI	217499	Y48G1BL.1		chrI	652716	Y65B4A.2		chrI	139821	F53G12.3
chrI	217500	Y48G1BL.1		chrI	653072	Y65B4A.2		chrI	146609	F56C11.1
chrI	217506	Y48G1BL.1		chrI	653085	Y65B4A.2		chrI	146623	F56C11.1
chrI	217510	Y48G1BL.1		chrI	660452	Y65B4A.8		chrI	146624	F56C11.1
chrI	217531	Y48G1BL.1		chrI	660516	Y65B4A.8		chrI	146633	F56C11.1
chrI	217540	Y48G1BL.1		chrI	662107	Y65B4A.8		chrI	146697	F56C11.1
chrI	217576	Y48G1BL.1		chrI	662108	Y65B4A.8		chrI	146711	F56C11.1
chrI	217577	Y48G1BL.1		chrI	677389			chrI	147095	F56C11.1
chrI	217590	Y48G1BL.1		chrI	677395			chrI	147488	F56C11.1
chrI	217595	Y48G1BL.1		chrI	677396			chrI	147516	F56C11.1
chrI	217596	Y48G1BL.1		chrI	678067			chrI	147573	F56C11.1
chrI	217599	Y48G1BL.1		chrI	678716			chrI	147607	F56C11.1
chrI	217600	Y48G1BL.1		chrI	678717			chrI	147614	F56C11.1
chrI	217602	Y48G1BL.1		chrI	678762			chrI	150593	F56C11.1
chrI	217605	Y48G1BL.1		chrI	678763			chrI	150644	F56C11.1
chrI	217614	Y48G1BL.1		chrI	678776			chrI	150980	F56C11.1
chrI	217626	Y48G1BL.1		chrI	678806			chrI	152156	F56C11.1
chrI	217627	Y48G1BL.1		chrI	678812			chrI	152298	F56C11.1
chrI	217628	Y48G1BL.1		chrI	679016			chrI	158869
chrI	217640	Y48G1BL.1		chrI	679017			chrI	158898
chrI	217649	Y48G1BL.1		chrI	679024			chrI	158919
chrI	217650	Y48G1BL.1		chrI	679039			chrI	158920
chrI	217658	Y48G1BL.1		chrI	679052			chrI	158933
chrI	217659	Y48G1BL.1		chrI	679053			chrI	158934
chrI	217667	Y48G1BL.1		chrI	679065			chrI	158944
chrI	217716	Y48G1BL.1		chrI	679069			chrI	158945
chrI	217736	Y48G1BL.1		chrI	679129			chrI	160332	F56C11.2
chrI	217737	Y48G1BL.1		chrI	679141			chrI	160909	F56C11.2
chrI	217759	Y48G1BL.1		chrI	679161			chrI	161713	F56C11.2
chrI	217764	Y48G1BL.1		chrI	679170			chrI	174022	F56C11.6
chrI	217811	Y48G1BL.1		chrI	679359			chrI	174674	F56C11.6
chrI	217812	Y48G1BL.1		chrI	701982	Y18H1A.3		chrI	174679	F56C11.6
chrI	217902	Y48G1BL.1		chrI	705613	Y18H1A.3		chrI	174709	F56C11.6
chrI	217924	Y48G1BL.1		chrI	705680	Y18H1A.3		chrI	183903	F56C11.4
chrI	217938	Y48G1BL.1		chrI	705681	Y18H1A.3		chrI	184313
chrI	217953	Y48G1BL.1		chrI	710749	Y18H1A.3		chrI	184346
chrI	219131			chrI	710847	Y18H1A.3		chrI	184347
chrI	221182	Y48G1BL.6		chrI	710870	Y18H1A.3		chrI	184350
chrI	229166			chrI	710873	Y18H1A.3		chrI	184351
chrI	233861	Y48G1BM.6		chrI	710874	Y18H1A.3		chrI	184356
chrI	234848	Y48G1BM.6		chrI	727397	Y18H1A.6		chrI	184361
chrI	253376	Y48G1BM.1		chrI	727398	Y18H1A.6		chrI	184367
chrI	254147			chrI	727399	Y18H1A.6		chrI	184368
chrI	254303			chrI	727421	Y18H1A.6		chrI	184371
chrI	256773	Y48G1BM.9		chrI	727494	Y18H1A.6		chrI	184380
chrI	256891	Y48G1BM.9		chrI	728636	Y18H1A.6		chrI	184381
chrI	256908	Y48G1BM.9		chrI	728709	Y18H1A.6		chrI	184384
chrI	256913	Y48G1BM.9		chrI	755776	Y18H1A.9		chrI	184394
chrI	257044	Y48G1BM.9		chrI	837391			chrI	184396
chrI	257052	Y48G1BM.9		chrI	859500	Y95B8A.7		chrI	184397
chrI	257053	Y48G1BM.9		chrI	859771	Y95B8A.7		chrI	184399
chrI	257054	Y48G1BM.9		chrI	867719	Y95B8A.7		chrI	184409
chrI	263854			chrI	867724	Y95B8A.7		chrI	184959
chrI	263859			chrI	949992	Y34D9B.1		chrI	185021
chrI	263860			chrI	950027	Y34D9B.1		chrI	185060
chrI	263863			chrI	950063	Y34D9B.1		chrI	191714	K10E9.1
chrI	263864			chrI	950098	Y34D9B.1		chrI	195150	K10E9.1
chrI	263866			chrI	950108	Y34D9B.1		chrI	195413	K10E9.1
chrI	263900			chrI	950232	Y34D9B.1		chrI	195420	K10E9.1
chrI	263920			chrI	950238	Y34D9B.1		chrI	198801	K10E9.1
chrI	263927			chrI	950271	Y34D9B.1		chrI	198826	K10E9.1
chrI	263936			chrI	950340	Y34D9B.1		chrI	198830	K10E9.1
chrI	263938			chrI	950368	Y34D9B.1		chrI	198831	K10E9.1
chrI	263948			chrI	974843			chrI	198841	K10E9.1
chrI	263951			chrI	975981			chrI	198845	K10E9.1
chrI	263952			chrI	975987			chrI	198870	K10E9.1
chrI	263953			chrI	975988			chrI	198874	K10E9.1
chrI	263956			chrI	1058164	Y34D9A.10		chrI	198886	K10E9.1
chrI	263963			chrI	1058548	Y34D9A.10		chrI	198887	K10E9.1
chrI	263964			chrI	1058565	Y34D9A.10		chrI	198897	K10E9.1
chrI	263972			chrI	1058575	Y34D9A.10		chrI	198899	K10E9.1
chrI	263973			chrI	1058590	Y34D9A.10		chrI	198900	K10E9.1
chrI	263974			chrI	1058643	Y34D9A.10		chrI	201111	K10E9.1
chrI	263986			chrI	1058671	Y34D9A.10		chrI	201112	K10E9.1
chrI	263987			chrI	1138365	Y48G8AL.9		chrI	201115	K10E9.1
chrI	285628	C53D5.2		chrI	1138381	Y48G8AL.9		chrI	201117	K10E9.1
chrI	290180			chrI	1138388	Y48G8AL.9		chrI	201123	K10E9.1
chrI	294591	C53D5.1		chrI	1138608	Y48G8AL.9		chrI	201130	K10E9.1
chrI	294609	C53D5.1		chrI	1139058	Y48G8AL.9		chrI	201131	K10E9.1
chrI	294636	C53D5.1		chrI	1139128	Y48G8AL.9		chrI	201138	K10E9.1
chrI	294880	C53D5.1		chrI	1145407	Y48G8AL.10		chrI	201140	K10E9.1
chrI	315781			chrI	1149056	Y48G8AL.10		chrI	204292	Y48G1BL.2
chrI	315796			chrI	1149060	Y48G8AL.10		chrI	204390	Y48G1BL.2
chrI	315821			chrI	1149061	Y48G8AL.10		chrI	205701	Y48G1BL.2
chrI	315822			chrI	1149069	Y48G8AL.10		chrI	205703	Y48G1BL.2
chrI	334855	Y48G1A.3		chrI	1149120	Y48G8AL.10		chrI	205997	Y48G1BL.2
chrI	335294	Y48G1A.3		chrI	1149126	Y48G8AL.10		chrI	206013	Y48G1BL.2
chrI	336410	Y48G1A.3		chrI	1154648			chrI	212336	Y48G1BL.3
chrI	336516	Y48G1A.3		chrI	1154659			chrI	213983	Y48G1BL.3
chrI	336605	Y48G1A.3		chrI	1154704			chrI	222058
chrI	337070	Y48G1A.3		chrI	1154749			chrI	222059
chrI	338635			chrI	1154772			chrI	222068
chrI	338819			chrI	1154773			chrI	222069
chrI	339003			chrI	1154849			chrI	222078
chrI	339187			chrI	1154864			chrI	222092
chrI	339371			chrI	1154873			chrI	222093
chrI	339555			chrI	1154882			chrI	222121
chrI	339739			chrI	1154903			chrI	222124
chrI	339923			chrI	1154924			chrI	222153
chrI	340107			chrI	1154925			chrI	222191
chrI	340291			chrI	1154926			chrI	247605
chrI	340659			chrI	1154940			chrI	250461	Y48G1BM.8
chrI	340843			chrI	1154941			chrI	250465	Y48G1BM.8
chrI	341027			chrI	1154950			chrI	250494	Y48G1BM.8
chrI	344441	Y48G1A.6		chrI	1154999			chrI	250499	Y48G1BM.8
chrI	344552	Y48G1A.6		chrI	1155058			chrI	250508	Y48G1BM.8
chrI	344559	Y48G1A.6		chrI	1155060			chrI	250517	Y48G1BM.8
chrI	344578	Y48G1A.6		chrI	1155083			chrI	250522	Y48G1BM.8
chrI	344773	Y48G1A.6		chrI	1155092			chrI	250532	Y48G1BM.8
chrI	344783	Y48G1A.6		chrI	1155113			chrI	250588	Y48G1BM.8
chrI	346747	Y48G1A.6		chrI	1155172			chrI	250600	Y48G1BM.8
chrI	346909	Y48G1A.6		chrI	1155196			chrI	250601	Y48G1BM.8
chrI	351911	Y48G1A.1		chrI	1155197			chrI	250614	Y48G1BM.8
chrI	352217	Y48G1A.1		chrI	1155235			chrI	257628
chrI	352227	Y48G1A.1		chrI	1161151	Y48G8AL.7		chrI	282357
chrI	352231	Y48G1A.1		chrI	1161257	Y48G8AL.7		chrI	282461
chrI	352234	Y48G1A.1		chrI	1161258	Y48G8AL.7		chrI	294792	C53D5.1
chrI	352238	Y48G1A.1		chrI	1161278	Y48G8AL.7		chrI	294793	C53D5.1
chrI	357261	R119.1		chrI	1161337	Y48G8AL.7		chrI	294799	C53D5.1
chrI	361268	R119.1		chrI	1161501	Y48G8AL.7		chrI	294812	C53D5.1
chrI	361284	R119.1		chrI	1161502	Y48G8AL.7		chrI	294814	C53D5.1
chrI	362707	R119.1		chrI	1164908	Y48G8AL.11		chrI	294816	C53D5.1
chrI	369861	R119.2		chrI	1164918	Y48G8AL.11		chrI	294820	C53D5.1
chrI	389874	R119.5		chrI	1165001	Y48G8AL.11		chrI	294825	C53D5.1
chrI	389886	R119.5		chrI	1165247	Y48G8AL.11		chrI	294835	C53D5.1
chrI	389924	R119.5		chrI	1168302	Y48G8AL.11		chrI	294838	C53D5.1
chrI	390083	R119.5		chrI	1168323	Y48G8AL.11		chrI	305051	C53D5.1
chrI	390116	R119.5		chrI	1168337	Y48G8AL.11		chrI	309852	C53D5.5
chrI	391045	R119.5		chrI	1168338	Y48G8AL.11		chrI	309853	C53D5.5
chrI	396207			chrI	1168378	Y48G8AL.11		chrI	309863	C53D5.5
chrI	396218			chrI	1168516	Y48G8AL.11		chrI	309866	C53D5.5
chrI	396219			chrI	1168517	Y48G8AL.11		chrI	309878	C53D5.5
chrI	396221			chrI	1168518	Y48G8AL.11		chrI	309895	C53D5.5
chrI	396223			chrI	1168573	Y48G8AL.11		chrI	309900	C53D5.5
chrI	396235			chrI	1168596	Y48G8AL.11		chrI	309904	C53D5.5
chrI	396236			chrI	1194837	Y48G8AL.5		chrI	309907	C53D5.5
chrI	396248			chrI	1197883	Y48G8AL.5		chrI	309937	C53D5.5
chrI	401617	Y50C1A.1		chrI	1197896	Y48G8AL.5		chrI	310039	C53D5.5
chrI	404509	Y50C1A.1		chrI	1197899	Y48G8AL.5		chrI	310040	C53D5.5
chrI	404515	Y50C1A.1		chrI	1197912	Y48G8AL.5		chrI	310057	C53D5.5
chrI	404523	Y50C1A.1		chrI	1197919	Y48G8AL.5		chrI	310060	C53D5.5
chrI	404536	Y50C1A.1		chrI	1197924	Y48G8AL.5		chrI	310063	C53D5.5
chrI	404540	Y50C1A.1		chrI	1198171	Y48G8AL.5		chrI	310074	C53D5.5
chrI	405543	Y50C1A.1		chrI	1198172	Y48G8AL.5		chrI	310075	C53D5.5
chrI	405560	Y50C1A.1		chrI	1198193	Y48G8AL.5		chrI	310090	C53D5.5
chrI	405567	Y50C1A.1		chrI	1198194	Y48G8AL.5		chrI	312286	C53D5.6
chrI	405568	Y50C1A.1		chrI	1198203	Y48G8AL.5		chrI	312447	C53D5.6
chrI	405861	Y50C1A.1		chrI	1198206	Y48G8AL.5		chrI	312490	C53D5.6
chrI	405891	Y50C1A.1		chrI	1198219	Y48G8AL.5		chrI	313663	C53D5.6
chrI	405895	Y50C1A.1		chrI	1198241	Y48G8AL.5		chrI	314053	C53D5.6
chrI	405946	Y50C1A.1		chrI	1198249	Y48G8AL.5		chrI	314242	C53D5.6
chrI	405947	Y50C1A.1		chrI	1198262	Y48G8AL.5		chrI	314554	C53D5.6
chrI	405951	Y50C1A.1		chrI	1198284	Y48G8AL.5		chrI	314694	C53D5.6
chrI	406881	Y50C1A.1		chrI	1198287	Y48G8AL.5		chrI	314947	C53D5.6
chrI	406891	Y50C1A.1		chrI	1198297	Y48G8AL.5		chrI	318204
chrI	406896	Y50C1A.1		chrI	1198331	Y48G8AL.5		chrI	318307
chrI	407120	Y50C1A.1		chrI	1202966	Y48G8AL.5		chrI	318322
chrI	409072	Y50C1A.1		chrI	1237366	Y48G8AL.1		chrI	318329
chrI	409086	Y50C1A.1		chrI	1237373	Y48G8AL.1		chrI	318330
chrI	409087	Y50C1A.1		chrI	1243352	Y48G8AL.1		chrI	318359
chrI	409094	Y50C1A.1		chrI	1243499	Y48G8AL.1		chrI	318491
chrI	409281	Y50C1A.1		chrI	1245741	Y48G8AL.1		chrI	320094	Y48G1A.5
chrI	410162	Y50C1A.1		chrI	1245742	Y48G8AL.1		chrI	321662	Y48G1A.5
chrI	410175	Y50C1A.1		chrI	1245755	Y48G8AL.1		chrI	322050	Y48G1A.5
chrI	410180	Y50C1A.1		chrI	1245756	Y48G8AL.1		chrI	322148	Y48G1A.5
chrI	410183	Y50C1A.1		chrI	1245765	Y48G8AL.1		chrI	325823	Y48G1A.4
chrI	410185	Y50C1A.1		chrI	1245774	Y48G8AL.1		chrI	325824	Y48G1A.4
chrI	410190	Y50C1A.1		chrI	1245775	Y48G8AL.1		chrI	330526	Y48G1A.4
chrI	410198	Y50C1A.1		chrI	1249911	Y48G8AL.1		chrI	330534	Y48G1A.4
chrI	410206	Y50C1A.1		chrI	1249970	Y48G8AL.1		chrI	330535	Y48G1A.4
chrI	410229	Y50C1A.1		chrI	1249971	Y48G8AL.1		chrI	330547	Y48G1A.4
chrI	410247	Y50C1A.1		chrI	1249981	Y48G8AL.1		chrI	330590	Y48G1A.4
chrI	411831	Y50C1A.1		chrI	1253812	Y48G8AL.1		chrI	330591	Y48G1A.4
chrI	411832	Y50C1A.1		chrI	1253837	Y48G8AL.1		chrI	336354	Y48G1A.3
chrI	411839	Y50C1A.1		chrI	1253884	Y48G8AL.1		chrI	336359	Y48G1A.3
chrI	422878	C07F11.2		chrI	1253901	Y48G8AL.1		chrI	336364	Y48G1A.3
chrI	431585			chrI	1253955	Y48G8AL.1		chrI	336365	Y48G1A.3
chrI	431589			chrI	1254130	Y48G8AL.1		chrI	336394	Y48G1A.3
chrI	431619			chrI	1254306	Y48G8AL.1		chrI	336404	Y48G1A.3
chrI	431620			chrI	1254307	Y48G8AL.1		chrI	336405	Y48G1A.3
chrI	431621			chrI	1258893			chrI	336475	Y48G1A.3
chrI	431629			chrI	1258904			chrI	336476	Y48G1A.3
chrI	431631			chrI	1258914			chrI	336497	Y48G1A.3
chrI	431649			chrI	1258924			chrI	336530	Y48G1A.3
chrI	431690			chrI	1258948			chrI	336531	Y48G1A.3
chrI	431711			chrI	1258961			chrI	336552	Y48G1A.3
chrI	431720			chrI	1258962			chrI	336553	Y48G1A.3
chrI	431777			chrI	1258971			chrI	336564	Y48G1A.3
chrI	431786			chrI	1258977			chrI	344718	Y48G1A.6
chrI	431795			chrI	1258978			chrI	344741	Y48G1A.6
chrI	431796			chrI	1259016			chrI	344761	Y48G1A.6
chrI	431804			chrI	1259018			chrI	344762	Y48G1A.6
chrI	431805			chrI	1259040			chrI	344770	Y48G1A.6
chrI	431816			chrI	1259067			chrI	344771	Y48G1A.6
chrI	431817			chrI	1259077			chrI	344797	Y48G1A.6
chrI	431846			chrI	1259079			chrI	344805	Y48G1A.6
chrI	431849			chrI	1259086			chrI	344816	Y48G1A.6
chrI	431884			chrI	1259096			chrI	346442	Y48G1A.6
chrI	431905			chrI	1259097			chrI	348104
chrI	432022			chrI	1259105			chrI	365076	R119.7
chrI	432047			chrI	1259106			chrI	365662	R119.7
chrI	432048			chrI	1259109			chrI	368188	R119.7
chrI	432060			chrI	1259110			chrI	368878	R119.2
chrI	432061			chrI	1259129			chrI	368910	R119.2
chrI	432065			chrI	1259179			chrI	379303	R119.4
chrI	432067			chrI	1259180			chrI	380279	R119.4
chrI	432070			chrI	1259190			chrI	380697	R119.4
chrI	432075			chrI	1259191			chrI	381223	R119.4
chrI	432076			chrI	1259213			chrI	383209	R119.6
chrI	432077			chrI	1259228			chrI	383211	R119.6
chrI	432108			chrI	1259233			chrI	383506	R119.6
chrI	432116			chrI	1259240			chrI	389930	R119.5
chrI	432117			chrI	1259262			chrI	389931	R119.5
chrI	432125			chrI	1259286			chrI	389942	R119.5
chrI	432126			chrI	1259296			chrI	391700	R119.5
chrI	432197			chrI	1259305			chrI	391702	R119.5
chrI	432215			chrI	1259336			chrI	391709	R119.5
chrI	432216			chrI	1259369			chrI	396253
chrI	432217			chrI	1259395			chrI	402306	Y50C1A.1
chrI	432222			chrI	1259399			chrI	408692	Y50C1A.1
chrI	432241			chrI	1259442			chrI	409069	Y50C1A.1
chrI	432243			chrI	1262014	Y48G8AR.1		chrI	410524	Y50C1A.1
chrI	432259			chrI	1262015	Y48G8AR.1		chrI	411636	Y50C1A.1
chrI	432262			chrI	1347092			chrI	411638	Y50C1A.1
chrI	432278			chrI	1347103			chrI	411645	Y50C1A.1
chrI	432281			chrI	1347104			chrI	411652	Y50C1A.1
chrI	432286			chrI	1347111			chrI	413401	Y50C1A.2
chrI	432287			chrI	1347119			chrI	413402	Y50C1A.2
chrI	432291			chrI	1347120			chrI	413752	Y50C1A.2
chrI	432298			chrI	1347131			chrI	413766	Y50C1A.2
chrI	432302			chrI	1347138			chrI	413767	Y50C1A.2
chrI	432313			chrI	1347140			chrI	413774	Y50C1A.2
chrI	432320			chrI	1347142			chrI	413775	Y50C1A.2
chrI	432322			chrI	1347145			chrI	413846	Y50C1A.2
chrI	432342			chrI	1347147			chrI	418460	Y50C1A.2
chrI	432355			chrI	1347215			chrI	431630
chrI	432358			chrI	1347217			chrI	431632
chrI	432359			chrI	1347218			chrI	431633
chrI	432360			chrI	1347230			chrI	431638
chrI	432378			chrI	1347231			chrI	431639
chrI	432379			chrI	1347233			chrI	431653
chrI	432383			chrI	1347260			chrI	431657
chrI	432384			chrI	1347261			chrI	431666
chrI	432395			chrI	1347266			chrI	431667
chrI	432401			chrI	1347591			chrI	431668
chrI	432403			chrI	1347592			chrI	431669
chrI	432404			chrI	1347593			chrI	431670
chrI	432405			chrI	1347601			chrI	431677
chrI	433447			chrI	1347602			chrI	431679
chrI	433455			chrI	1347606			chrI	431680
chrI	433462			chrI	1347607			chrI	431683
chrI	447411	C07F11.1		chrI	1347608			chrI	431684
chrI	447412	C07F11.1		chrI	1347616			chrI	431688
chrI	447559	C07F11.1		chrI	1347617			chrI	431691
chrI	447564	C07F11.1		chrI	1347623			chrI	431692
chrI	447573	C07F11.1		chrI	1347677			chrI	431693
chrI	447581	C07F11.1		chrI	1347685			chrI	431694
chrI	454440	C07F11.1		chrI	1347686			chrI	431695
chrI	475612			chrI	1347688			chrI	431698
chrI	477135			chrI	1347695			chrI	431704
chrI	496330	Y65B4BL.3		chrI	1347715			chrI	431708
chrI	497356	Y65B4BL.3		chrI	1347716			chrI	431709
chrI	500274	Y65B4BL.3		chrI	1347727			chrI	431712
chrI	500285	Y65B4BL.3		chrI	1347737			chrI	446167	C07F11.1
chrI	500308	Y65B4BL.3		chrI	1347778			chrI	446173	C07F11.1
chrI	500337	Y65B4BL.3		chrI	1347788			chrI	446180	C07F11.1
chrI	500488	Y65B4BL.3		chrI	1347789			chrI	446186	C07F11.1
chrI	500489	Y65B4BL.3		chrI	1347805			chrI	446220	C07F11.1
chrI	500502	Y65B4BL.3		chrI	1347816			chrI	446225	C07F11.1
chrI	500503	Y65B4BL.3		chrI	1347825			chrI	446232	C07F11.1
chrI	500504	Y65B4BL.3		chrI	1347845			chrI	446288	C07F11.1
chrI	500511	Y65B4BL.3		chrI	1347849			chrI	452020	C07F11.1
chrI	500518	Y65B4BL.3		chrI	1347850			chrI	452041	C07F11.1
chrI	500519	Y65B4BL.3		chrI	1347854			chrI	452051	C07F11.1
chrI	500520	Y65B4BL.3		chrI	1347856			chrI	452068	C07F11.1
chrI	500527	Y65B4BL.3		chrI	1347895			chrI	452073	C07F11.1
chrI	500528	Y65B4BL.3		chrI	1347903			chrI	452249	C07F11.1
chrI	500536	Y65B4BL.3		chrI	1347911			chrI	452250	C07F11.1
chrI	500680	Y65B4BL.3		chrI	1347925			chrI	452251	C07F11.1
chrI	500685	Y65B4BL.3		chrI	1347929			chrI	452252	C07F11.1
chrI	500686	Y65B4BL.3		chrI	1347931			chrI	452258	C07F11.1
chrI	500687	Y65B4BL.3		chrI	1347966			chrI	452263	C07F11.1
chrI	500688	Y65B4BL.3		chrI	1347980			chrI	452288	C07F11.1
chrI	500693	Y65B4BL.3		chrI	1349228	Y92H12BL.1		chrI	452296	C07F11.1
chrI	500695	Y65B4BL.3		chrI	1349251	Y92H12BL.1		chrI	452355	C07F11.1
chrI	500710	Y65B4BL.3		chrI	1349275	Y92H12BL.1		chrI	452365	C07F11.1
chrI	500724	Y65B4BL.3		chrI	1356755	Y92H12BL.1		chrI	452368	C07F11.1
chrI	500725	Y65B4BL.3		chrI	1356884	Y92H12BL.1		chrI	454014	C07F11.1
chrI	500762	Y65B4BL.3		chrI	1357529	Y92H12BL.1		chrI	454035	C07F11.1
chrI	500765	Y65B4BL.3		chrI	1358481	Y92H12BL.1		chrI	454036	C07F11.1
chrI	500766	Y65B4BL.3		chrI	1358491	Y92H12BL.1		chrI	454051	C07F11.1
chrI	500778	Y65B4BL.3		chrI	1358496	Y92H12BL.1		chrI	454052	C07F11.1
chrI	500803	Y65B4BL.3		chrI	1358503	Y92H12BL.1		chrI	454065	C07F11.1
chrI	500804	Y65B4BL.3		chrI	1358504	Y92H12BL.1		chrI	454066	C07F11.1
chrI	500814	Y65B4BL.3		chrI	1358506	Y92H12BL.1		chrI	454109	C07F11.1
chrI	503184	Y65B4BL.4		chrI	1358516	Y92H12BL.1		chrI	454110	C07F11.1
chrI	504067	Y65B4BL.4		chrI	1358517	Y92H12BL.1		chrI	454114	C07F11.1
chrI	504674	Y65B4BL.4		chrI	1358528	Y92H12BL.1		chrI	454115	C07F11.1
chrI	504675	Y65B4BL.4		chrI	1358529	Y92H12BL.1		chrI	454116	C07F11.1
chrI	504712	Y65B4BL.4		chrI	1358550	Y92H12BL.1		chrI	454121	C07F11.1
chrI	504713	Y65B4BL.4		chrI	1358556	Y92H12BL.1		chrI	457544	C07F11.1
chrI	504718	Y65B4BL.4		chrI	1358569	Y92H12BL.1		chrI	457551	C07F11.1
chrI	504767	Y65B4BL.4		chrI	1358580	Y92H12BL.1		chrI	457963	C07F11.1
chrI	504777	Y65B4BL.4		chrI	1358584	Y92H12BL.1		chrI	457968	C07F11.1
chrI	505293	Y65B4BL.4		chrI	1358585	Y92H12BL.1		chrI	458024	C07F11.1
chrI	505309	Y65B4BL.4		chrI	1358586	Y92H12BL.1		chrI	459278	C07F11.1
chrI	505319	Y65B4BL.4		chrI	1358587	Y92H12BL.1		chrI	459765	C07F11.1
chrI	505321	Y65B4BL.4		chrI	1358622	Y92H12BL.1		chrI	461093	C07F11.1
chrI	505328	Y65B4BL.4		chrI	1358699	Y92H12BL.1		chrI	461138	C07F11.1
chrI	505433	Y65B4BL.4		chrI	1358719	Y92H12BL.1		chrI	461148	C07F11.1
chrI	505438	Y65B4BL.4		chrI	1358742	Y92H12BL.1		chrI	493261	W04C9.1
chrI	505450	Y65B4BL.4		chrI	1358743	Y92H12BL.1		chrI	500826	Y65B4BL.3
chrI	506745	Y65B4BL.2		chrI	1358753	Y92H12BL.1		chrI	500868	Y65B4BL.3
chrI	510597	Y65B4BL.7		chrI	1358763	Y92H12BL.1		chrI	500914	Y65B4BL.3
chrI	511055	Y65B4BL.5		chrI	1358764	Y92H12BL.1		chrI	504447	Y65B4BL.4
chrI	511808	Y65B4BL.5		chrI	1358765	Y92H12BL.1		chrI	504547	Y65B4BL.4
chrI	511821	Y65B4BL.5		chrI	1358771	Y92H12BL.1		chrI	506815	Y65B4BL.2
chrI	511825	Y65B4BL.5		chrI	1358772	Y92H12BL.1		chrI	506817	Y65B4BL.2
chrI	511834	Y65B4BL.5		chrI	1358773	Y92H12BL.1		chrI	506915	Y65B4BL.2
chrI	511853	Y65B4BL.5		chrI	1358778	Y92H12BL.1		chrI	508701	Y65B4BL.2
chrI	511893	Y65B4BL.5		chrI	1358789	Y92H12BL.1		chrI	508715	Y65B4BL.2
chrI	511897	Y65B4BL.5		chrI	1358790	Y92H12BL.1		chrI	512866	Y65B4BL.5
chrI	511982	Y65B4BL.5		chrI	1358801	Y92H12BL.1		chrI	512921	Y65B4BL.5
chrI	511990	Y65B4BL.5		chrI	1358805	Y92H12BL.1		chrI	512935	Y65B4BL.5
chrI	511991	Y65B4BL.5		chrI	1358812	Y92H12BL.1		chrI	513453	Y65B4BL.5
chrI	511992	Y65B4BL.5		chrI	1358826	Y92H12BL.1		chrI	513537	Y65B4BL.5
chrI	511996	Y65B4BL.5		chrI	1358850	Y92H12BL.1		chrI	513571	Y65B4BL.5
chrI	512015	Y65B4BL.5		chrI	1358855	Y92H12BL.1		chrI	513815	Y65B4BL.5
chrI	512194	Y65B4BL.5		chrI	1358864	Y92H12BL.1		chrI	513947	Y65B4BL.5
chrI	512198	Y65B4BL.5		chrI	1358874	Y92H12BL.1		chrI	514213	Y65B4BL.5
chrI	512199	Y65B4BL.5		chrI	1358891	Y92H12BL.1		chrI	516052	Y65B4BL.5
chrI	512211	Y65B4BL.5		chrI	1358892	Y92H12BL.1		chrI	516053	Y65B4BL.5
chrI	512214	Y65B4BL.5		chrI	1358905	Y92H12BL.1		chrI	517087
chrI	512222	Y65B4BL.5		chrI	1358917	Y92H12BL.1		chrI	517114
chrI	512225	Y65B4BL.5		chrI	1358922	Y92H12BL.1		chrI	517138
chrI	512226	Y65B4BL.5		chrI	1358924	Y92H12BL.1		chrI	517148
chrI	512227	Y65B4BL.5		chrI	1358930	Y92H12BL.1		chrI	517149
chrI	512230	Y65B4BL.5		chrI	1358935	Y92H12BL.1		chrI	517159
chrI	512236	Y65B4BL.5		chrI	1358940	Y92H12BL.1		chrI	517165
chrI	512237	Y65B4BL.5		chrI	1358957	Y92H12BL.1		chrI	517169
chrI	512244	Y65B4BL.5		chrI	1359040	Y92H12BL.1		chrI	517170
chrI	512311	Y65B4BL.5		chrI	1359049	Y92H12BL.1		chrI	517171
chrI	512356	Y65B4BL.5		chrI	1359062	Y92H12BL.1		chrI	517175
chrI	512379	Y65B4BL.5		chrI	1359065	Y92H12BL.1		chrI	517176
chrI	512402	Y65B4BL.5		chrI	1359068	Y92H12BL.1		chrI	517182
chrI	512406	Y65B4BL.5		chrI	1359069	Y92H12BL.1		chrI	517183
chrI	512418	Y65B4BL.5		chrI	1359079	Y92H12BL.1		chrI	517197
chrI	512419	Y65B4BL.5		chrI	1359097	Y92H12BL.1		chrI	517227
chrI	512421	Y65B4BL.5		chrI	1359098	Y92H12BL.1		chrI	517251
chrI	514613	Y65B4BL.5		chrI	1359099	Y92H12BL.1		chrI	517306
chrI	514854	Y65B4BL.5		chrI	1359104	Y92H12BL.1		chrI	517488
chrI	514869	Y65B4BL.5		chrI	1359108	Y92H12BL.1		chrI	517494
chrI	514870	Y65B4BL.5		chrI	1359110	Y92H12BL.1		chrI	517495
chrI	514892	Y65B4BL.5		chrI	1359111	Y92H12BL.1		chrI	517501
chrI	514904	Y65B4BL.5		chrI	1359113	Y92H12BL.1		chrI	517515
chrI	514938	Y65B4BL.5		chrI	1359127	Y92H12BL.1		chrI	517516
chrI	514940	Y65B4BL.5		chrI	1359155	Y92H12BL.1		chrI	517517
chrI	514966	Y65B4BL.5		chrI	1359164	Y92H12BL.1		chrI	517520
chrI	515448	Y65B4BL.5		chrI	1359169	Y92H12BL.1		chrI	517521
chrI	515449	Y65B4BL.5		chrI	1359180	Y92H12BL.1		chrI	517528
chrI	515549	Y65B4BL.5		chrI	1359190	Y92H12BL.1		chrI	517529
chrI	515609	Y65B4BL.5		chrI	1359194	Y92H12BL.1		chrI	517530
chrI	515683	Y65B4BL.5		chrI	1359198	Y92H12BL.1		chrI	517541
chrI	516072	Y65B4BL.5		chrI	1359204	Y92H12BL.1		chrI	517560
chrI	516238	Y65B4BL.5		chrI	1359213	Y92H12BL.1		chrI	517561
chrI	516248	Y65B4BL.5		chrI	1359214	Y92H12BL.1		chrI	517570
chrI	516264	Y65B4BL.5		chrI	1359218	Y92H12BL.1		chrI	517571
chrI	517403			chrI	1359219	Y92H12BL.1		chrI	517577
chrI	521101	Y65B4BL.6		chrI	1359229	Y92H12BL.1		chrI	517583
chrI	531754	Y65B4BL.1		chrI	1359236	Y92H12BL.1		chrI	517822
chrI	533363			chrI	1359250	Y92H12BL.1		chrI	517868
chrI	533367			chrI	1359251	Y92H12BL.1		chrI	517902
chrI	533377			chrI	1359258	Y92H12BL.1		chrI	520216	Y65B4BL.6
chrI	533393			chrI	1359259	Y92H12BL.1		chrI	532560	Y65B4BL.1
chrI	533464			chrI	1359260	Y92H12BL.1		chrI	535932	Y65B4BR.5
chrI	533473			chrI	1359261	Y92H12BL.1		chrI	536312	Y65B4BR.5
chrI	533483			chrI	1359262	Y92H12BL.1		chrI	536356	Y65B4BR.5
chrI	533502			chrI	1359265	Y92H12BL.1		chrI	537349	Y65B4BR.4
chrI	534568	Y65B4BR.8		chrI	1359267	Y92H12BL.1		chrI	537674	Y65B4BR.4
chrI	536627	Y65B4BR.5		chrI	1359328	Y92H12BL.1		chrI	538353	Y65B4BR.4
chrI	538074	Y65B4BR.4		chrI	1359350	Y92H12BL.1		chrI	538355	Y65B4BR.4
chrI	538075	Y65B4BR.4		chrI	1359352	Y92H12BL.1		chrI	538356	Y65B4BR.4
chrI	538080	Y65B4BR.4		chrI	1359353	Y92H12BL.1		chrI	538373	Y65B4BR.4
chrI	538081	Y65B4BR.4		chrI	1359362	Y92H12BL.1		chrI	538379	Y65B4BR.4
chrI	538114	Y65B4BR.4		chrI	1359363	Y92H12BL.1		chrI	538380	Y65B4BR.4
chrI	538115	Y65B4BR.4		chrI	1359369	Y92H12BL.1		chrI	538381	Y65B4BR.4
chrI	538116	Y65B4BR.4		chrI	1359373	Y92H12BL.1		chrI	538389	Y65B4BR.4
chrI	538117	Y65B4BR.4		chrI	1359374	Y92H12BL.1		chrI	538407	Y65B4BR.4
chrI	538126	Y65B4BR.4		chrI	1359388	Y92H12BL.1		chrI	538413	Y65B4BR.4
chrI	538368	Y65B4BR.4		chrI	1359397	Y92H12BL.1		chrI	538414	Y65B4BR.4
chrI	538493	Y65B4BR.4		chrI	1359403	Y92H12BL.1		chrI	538417	Y65B4BR.4
chrI	538509	Y65B4BR.4		chrI	1359426	Y92H12BL.1		chrI	538418	Y65B4BR.4
chrI	538510	Y65B4BR.4		chrI	1359431	Y92H12BL.1		chrI	538428	Y65B4BR.4
chrI	538516	Y65B4BR.4		chrI	1359436	Y92H12BL.1		chrI	538492	Y65B4BR.4
chrI	538552	Y65B4BR.4		chrI	1359460	Y92H12BL.1		chrI	539532	Y65B4BR.4
chrI	554515	Y65B4BR.3		chrI	1359476	Y92H12BL.1		chrI	539545	Y65B4BR.4
chrI	554516	Y65B4BR.3		chrI	1359477	Y92H12BL.1		chrI	539553	Y65B4BR.4
chrI	554519	Y65B4BR.3		chrI	1359479	Y92H12BL.1		chrI	540775	Y65B4BR.4
chrI	554525	Y65B4BR.3		chrI	1359492	Y92H12BL.1		chrI	540821	Y65B4BR.4
chrI	554531	Y65B4BR.3		chrI	1359499	Y92H12BL.1		chrI	540878	Y65B4BR.4
chrI	554532	Y65B4BR.3		chrI	1359508	Y92H12BL.1		chrI	541475	Y65B4BR.4
chrI	554533	Y65B4BR.3		chrI	1359516	Y92H12BL.1		chrI	542156	Y65B4BR.4
chrI	554545	Y65B4BR.3		chrI	1364248			chrI	543133
chrI	554595	Y65B4BR.3		chrI	1364249			chrI	543134
chrI	554597	Y65B4BR.3		chrI	1364261			chrI	543135
chrI	554713	Y65B4BR.3		chrI	1364272			chrI	543150
chrI	554726	Y65B4BR.3		chrI	1364288			chrI	552517	Y65B4BR.3
chrI	554774	Y65B4BR.3		chrI	1364292			chrI	552645	Y65B4BR.3
chrI	556622	Y65B4BR.3		chrI	1364296			chrI	554465	Y65B4BR.3
chrI	557648	Y65B4BR.2		chrI	1364304			chrI	554781	Y65B4BR.3
chrI	557659	Y65B4BR.2		chrI	1364319			chrI	555262	Y65B4BR.3
chrI	557747	Y65B4BR.2		chrI	1375836	Y92H12BL.5		chrI	555767	Y65B4BR.3
chrI	557752	Y65B4BR.2		chrI	1375851	Y92H12BL.5		chrI	557632	Y65B4BR.2
chrI	557820	Y65B4BR.2		chrI	1375897			chrI	557649	Y65B4BR.2
chrI	557821	Y65B4BR.2		chrI	1375906			chrI	557650	Y65B4BR.2
chrI	557824	Y65B4BR.2		chrI	1375917			chrI	557652	Y65B4BR.2
chrI	557878	Y65B4BR.2		chrI	1375918			chrI	557660	Y65B4BR.2
chrI	557911	Y65B4BR.2		chrI	1375919			chrI	557674	Y65B4BR.2
chrI	557918	Y65B4BR.2		chrI	1375922			chrI	558311	Y65B4BR.2
chrI	557928	Y65B4BR.2		chrI	1375927			chrI	558312	Y65B4BR.2
chrI	558058	Y65B4BR.2		chrI	1375928			chrI	564887	Y65B4BR.1
chrI	558059	Y65B4BR.2		chrI	1375978			chrI	564998	Y65B4BR.1
chrI	558064	Y65B4BR.2		chrI	1376000			chrI	565017	Y65B4BR.1
chrI	558066	Y65B4BR.2		chrI	1376030			chrI	565170	Y65B4BR.1
chrI	558071	Y65B4BR.2		chrI	1376036			chrI	600666	F56A6.2
chrI	558083	Y65B4BR.2		chrI	1376045			chrI	600677	F56A6.2
chrI	558097	Y65B4BR.2		chrI	1376046			chrI	600680	F56A6.2
chrI	558135	Y65B4BR.2		chrI	1376109			chrI	600681	F56A6.2
chrI	558138	Y65B4BR.2		chrI	1376118			chrI	600693	F56A6.2
chrI	558139	Y65B4BR.2		chrI	1376123			chrI	600699	F56A6.2
chrI	571422			chrI	1376142			chrI	600705	F56A6.2
chrI	571451			chrI	1376205			chrI	600709	F56A6.2
chrI	596976	F56A6.2		chrI	1376216			chrI	600715	F56A6.2
chrI	596988	F56A6.2		chrI	1376219			chrI	600716	F56A6.2
chrI	597246	F56A6.2		chrI	1376226			chrI	600719	F56A6.2
chrI	597254	F56A6.2		chrI	1376282			chrI	600726	F56A6.2
chrI	598794	F56A6.2		chrI	1376320			chrI	600729	F56A6.2
chrI	598796	F56A6.2		chrI	1376322			chrI	600732	F56A6.2
chrI	598809	F56A6.2		chrI	1376343			chrI	600733	F56A6.2
chrI	598821	F56A6.2		chrI	1376355			chrI	600734	F56A6.2
chrI	598842	F56A6.2		chrI	1376356			chrI	600741	F56A6.2
chrI	599037	F56A6.2		chrI	1376372			chrI	600742	F56A6.2
chrI	599068	F56A6.2		chrI	1376379			chrI	600754	F56A6.2
chrI	599071	F56A6.2		chrI	1376380			chrI	600768	F56A6.2
chrI	599082	F56A6.2		chrI	1376385			chrI	600771	F56A6.2
chrI	599087	F56A6.2		chrI	1376419			chrI	600774	F56A6.2
chrI	599141	F56A6.2		chrI	1376420			chrI	614072
chrI	599151	F56A6.2		chrI	1376430			chrI	614076
chrI	599152	F56A6.2		chrI	1376432			chrI	614092
chrI	599172	F56A6.2		chrI	1376440			chrI	614098
chrI	599189	F56A6.2		chrI	1376445			chrI	614110
chrI	599199	F56A6.2		chrI	1376450			chrI	614116
chrI	601022	F56A6.2		chrI	1376457			chrI	614149
chrI	601043	F56A6.2		chrI	1376463			chrI	614165
chrI	601055	F56A6.2		chrI	1376468			chrI	615484	F56A6.4
chrI	601068	F56A6.2		chrI	1376475			chrI	615502	F56A6.4
chrI	601070	F56A6.2		chrI	1376486			chrI	615514	F56A6.4
chrI	615468	F56A6.4		chrI	1376488			chrI	615515	F56A6.4
chrI	615475	F56A6.4		chrI	1376497			chrI	615577	F56A6.4
chrI	615617	F56A6.4		chrI	1376499			chrI	615578	F56A6.4
chrI	616772	F56A6.4		chrI	1376508			chrI	615586	F56A6.4
chrI	616774	F56A6.4		chrI	1376509			chrI	615589	F56A6.4
chrI	616801	F56A6.4		chrI	1376534			chrI	615596	F56A6.4
chrI	616813	F56A6.4		chrI	1376535			chrI	616707	F56A6.4
chrI	616817	F56A6.4		chrI	1376542			chrI	616721	F56A6.4
chrI	616824	F56A6.4		chrI	1376547			chrI	616761	F56A6.4
chrI	616829	F56A6.4		chrI	1376548			chrI	616775	F56A6.4
chrI	616830	F56A6.4		chrI	1376549			chrI	616778	F56A6.4
chrI	616855	F56A6.4		chrI	1376550			chrI	616788	F56A6.4
chrI	616965	F56A6.4		chrI	1376558			chrI	616823	F56A6.4
chrI	616985	F56A6.4		chrI	1376567			chrI	616833	F56A6.4
chrI	616988	F56A6.4		chrI	1376569			chrI	619901
chrI	616997	F56A6.4		chrI	1376933			chrI	620639
chrI	617062	F56A6.4		chrI	1377541	Y92H12BL.4		chrI	622474	F56A6.4
chrI	617064	F56A6.4		chrI	1378087	Y92H12BL.4		chrI	622481	F56A6.4
chrI	617068	F56A6.4		chrI	1386697	Y92H12BM.1		chrI	622498	F56A6.4
chrI	617071	F56A6.4		chrI	1386698	Y92H12BM.1		chrI	622499	F56A6.4
chrI	617072	F56A6.4		chrI	1386776	Y92H12BM.1		chrI	622510	F56A6.4
chrI	617073	F56A6.4		chrI	1386786	Y92H12BM.1		chrI	622516	F56A6.4
chrI	617101	F56A6.4		chrI	1387456	Y92H12BM.1		chrI	622517	F56A6.4
chrI	617102	F56A6.4		chrI	1387508	Y92H12BM.1		chrI	622519	F56A6.4
chrI	617135	F56A6.4		chrI	1387641	Y92H12BM.1		chrI	622520	F56A6.4
chrI	617136	F56A6.4		chrI	1387671	Y92H12BM.1		chrI	622527	F56A6.4
chrI	617160	F56A6.4		chrI	1387734	Y92H12BM.1		chrI	622531	F56A6.4
chrI	617161	F56A6.4		chrI	1387744	Y92H12BM.1		chrI	622539	F56A6.4
chrI	617418	F56A6.4		chrI	1418024	Y92H12BR.3		chrI	622541	F56A6.4
chrI	617451	F56A6.4		chrI	1418049	Y92H12BR.3		chrI	622543	F56A6.4
chrI	617485	F56A6.4		chrI	1418186	Y92H12BR.3		chrI	622544	F56A6.4
chrI	617486	F56A6.4		chrI	1418196	Y92H12BR.3		chrI	622553	F56A6.4
chrI	617510	F56A6.4		chrI	1418217	Y92H12BR.3		chrI	622559	F56A6.4
chrI	617511	F56A6.4		chrI	1420118	Y92H12BR.3		chrI	622573	F56A6.4
chrI	622197	F56A6.4		chrI	1420121	Y92H12BR.3		chrI	622586	F56A6.4
chrI	622200	F56A6.4		chrI	1422589	Y92H12BR.3		chrI	622588	F56A6.4
chrI	622491	F56A6.4		chrI	1425477			chrI	622591	F56A6.4
chrI	622530	F56A6.4		chrI	1425566			chrI	622593	F56A6.4
chrI	622638	F56A6.4		chrI	1425962			chrI	622663	F56A6.4
chrI	622640	F56A6.4		chrI	1425995			chrI	622779	F56A6.4
chrI	622683	F56A6.4		chrI	1425996			chrI	622850	F56A6.4
chrI	622695	F56A6.4		chrI	1426018			chrI	622851	F56A6.4
chrI	622696	F56A6.4		chrI	1426028			chrI	622948	F56A6.4
chrI	622721	F56A6.4		chrI	1426041			chrI	622962	F56A6.4
chrI	622809	F56A6.4		chrI	1426048			chrI	622967	F56A6.4
chrI	622816	F56A6.4		chrI	1426097			chrI	622977	F56A6.4
chrI	629689			chrI	1426098			chrI	622978	F56A6.4
chrI	629704			chrI	1426110			chrI	622979	F56A6.4
chrI	629740			chrI	1426111			chrI	622980	F56A6.4
chrI	629741			chrI	1426113			chrI	622982	F56A6.4
chrI	629781			chrI	1426131			chrI	622987	F56A6.4
chrI	629787			chrI	1426144			chrI	622991	F56A6.4
chrI	629797			chrI	1426146			chrI	622993	F56A6.4
chrI	629813			chrI	1426160			chrI	622994	F56A6.4
chrI	630123			chrI	1426170			chrI	623000	F56A6.4
chrI	630133			chrI	1426203			chrI	623001	F56A6.4
chrI	630143			chrI	1426206			chrI	623004	F56A6.4
chrI	630157			chrI	1426207			chrI	623008	F56A6.4
chrI	630158			chrI	1426213			chrI	623027	F56A6.4
chrI	630160			chrI	1426381			chrI	623042	F56A6.4
chrI	630168			chrI	1426387			chrI	629682
chrI	630171			chrI	1426394			chrI	629693
chrI	630172			chrI	1426407			chrI	629712
chrI	630236			chrI	1426449			chrI	629719
chrI	630250			chrI	1426450			chrI	629720
chrI	630251			chrI	1426458			chrI	629732
chrI	630417			chrI	1426466			chrI	629745
chrI	630794			chrI	1426522			chrI	629755
chrI	630806			chrI	1426534			chrI	629756
chrI	630817			chrI	1426570			chrI	629757
chrI	630822			chrI	1426574			chrI	629758
chrI	630841			chrI	1426575			chrI	629760
chrI	633121	Y65B4A.6		chrI	1426576			chrI	629762
chrI	633131	Y65B4A.6		chrI	1426904			chrI	629766
chrI	633132	Y65B4A.6		chrI	1434334			chrI	629767
chrI	633138	Y65B4A.6		chrI	1434335			chrI	629768
chrI	633147	Y65B4A.6		chrI	1434357			chrI	629769
chrI	633152	Y65B4A.6		chrI	1434368			chrI	629770
chrI	633176	Y65B4A.6		chrI	1434371			chrI	629782
chrI	633187	Y65B4A.6		chrI	1434407			chrI	629785
chrI	633189	Y65B4A.6		chrI	1434412			chrI	629793
chrI	633210	Y65B4A.6		chrI	1434417			chrI	629794
chrI	633213	Y65B4A.6		chrI	1434430			chrI	629795
chrI	633222	Y65B4A.6		chrI	1434443			chrI	629798
chrI	633223	Y65B4A.6		chrI	1434454			chrI	629799
chrI	633239	Y65B4A.6		chrI	1434468			chrI	629802
chrI	633245	Y65B4A.6		chrI	1434480			chrI	629804
chrI	633246	Y65B4A.6		chrI	1434513			chrI	629816
chrI	633247	Y65B4A.6		chrI	1434514			chrI	629817
chrI	633251	Y65B4A.6		chrI	1434528			chrI	629818
chrI	633252	Y65B4A.6		chrI	1434559			chrI	629820
chrI	633259	Y65B4A.6		chrI	1434693			chrI	629823
chrI	633270	Y65B4A.6		chrI	1434749			chrI	629825
chrI	633271	Y65B4A.6		chrI	1434810			chrI	629826
chrI	633298	Y65B4A.6		chrI	1434811			chrI	629834
chrI	633308	Y65B4A.6		chrI	1434838			chrI	629837
chrI	633312	Y65B4A.6		chrI	1434849			chrI	629839
chrI	633313	Y65B4A.6		chrI	1434861			chrI	629840
chrI	633314	Y65B4A.6		chrI	1437841	Y92H12BR.8		chrI	629843
chrI	633323	Y65B4A.6		chrI	1437949	Y92H12BR.8		chrI	629844
chrI	633333	Y65B4A.6		chrI	1437953	Y92H12BR.8		chrI	629845
chrI	633343	Y65B4A.6		chrI	1437960	Y92H12BR.8		chrI	629847
chrI	633354	Y65B4A.6		chrI	1438977	Y92H12BR.8		chrI	629848
chrI	633365	Y65B4A.6		chrI	1439188	Y92H12BR.8		chrI	629853
chrI	633367	Y65B4A.6		chrI	1439231	Y92H12BR.8		chrI	629897
chrI	633376	Y65B4A.6		chrI	1491906	Y92H12A.5		chrI	629898
chrI	633392	Y65B4A.6		chrI	1491924	Y92H12A.5		chrI	629906
chrI	633418	Y65B4A.6		chrI	1491925	Y92H12A.5		chrI	629907
chrI	633483	Y65B4A.6		chrI	1491947	Y92H12A.5		chrI	629923
chrI	633484	Y65B4A.6		chrI	1491952	Y92H12A.5		chrI	629927
chrI	633496	Y65B4A.6		chrI	1493748	Y92H12A.5		chrI	629932
chrI	633499	Y65B4A.6		chrI	1493754	Y92H12A.5		chrI	629938
chrI	633555	Y65B4A.6		chrI	1493765	Y92H12A.5		chrI	629942
chrI	633559	Y65B4A.6		chrI	1493801	Y92H12A.5		chrI	630058
chrI	633568	Y65B4A.6		chrI	1493826	Y92H12A.5		chrI	630073
chrI	633598	Y65B4A.6		chrI	1493827	Y92H12A.5		chrI	630087
chrI	633599	Y65B4A.6		chrI	1493828	Y92H12A.5		chrI	630089
chrI	633606	Y65B4A.6		chrI	1493829	Y92H12A.5		chrI	630090
chrI	633609	Y65B4A.6		chrI	1493841	Y92H12A.5		chrI	630093
chrI	633626	Y65B4A.6		chrI	1493863	Y92H12A.5		chrI	630095
chrI	633645	Y65B4A.6		chrI	1493865	Y92H12A.5		chrI	630101
chrI	633647	Y65B4A.6		chrI	1493905	Y92H12A.5		chrI	630112
chrI	633652	Y65B4A.6		chrI	1494007	Y92H12A.5		chrI	630113
chrI	633660	Y65B4A.6		chrI	1494020	Y92H12A.5		chrI	630134
chrI	633676	Y65B4A.6		chrI	1494021	Y92H12A.5		chrI	630144
chrI	633685	Y65B4A.6		chrI	1494101	Y92H12A.5		chrI	630153
chrI	633709	Y65B4A.6		chrI	1494116	Y92H12A.5		chrI	630186
chrI	633710	Y65B4A.6		chrI	1494117	Y92H12A.5		chrI	630187
chrI	633713	Y65B4A.6		chrI	1494139	Y92H12A.5		chrI	630194
chrI	633718	Y65B4A.6		chrI	1494148	Y92H12A.5		chrI	630226
chrI	633729	Y65B4A.6		chrI	1494190	Y92H12A.5		chrI	630249
chrI	633732	Y65B4A.6		chrI	1494199	Y92H12A.5		chrI	630279
chrI	633734	Y65B4A.6		chrI	1494216	Y92H12A.5		chrI	630294
chrI	633743	Y65B4A.6		chrI	1494287	Y92H12A.5		chrI	630331
chrI	633745	Y65B4A.6		chrI	1494293	Y92H12A.5		chrI	630416
chrI	633772	Y65B4A.6		chrI	1494294	Y92H12A.5		chrI	630426
chrI	633800	Y65B4A.6		chrI	1494303	Y92H12A.5		chrI	630427
chrI	633812	Y65B4A.6		chrI	1494304	Y92H12A.5		chrI	630436
chrI	633813	Y65B4A.6		chrI	1494316	Y92H12A.5		chrI	630441
chrI	633816	Y65B4A.6		chrI	1494329	Y92H12A.5		chrI	630443
chrI	633895	Y65B4A.6		chrI	1494430	Y92H12A.5		chrI	630445
chrI	635100	Y65B4A.6		chrI	1494431	Y92H12A.5		chrI	630449
chrI	635529	Y65B4A.6		chrI	1494434	Y92H12A.5		chrI	630458
chrI	635563	Y65B4A.6		chrI	1542158			chrI	630459
chrI	635564	Y65B4A.6		chrI	1542169			chrI	630460
chrI	635582	Y65B4A.6		chrI	1545885	Y92H12A.2		chrI	630461
chrI	637347	Y65B4A.3		chrI	1545918	Y92H12A.2		chrI	630465
chrI	639616	Y65B4A.2		chrI	1545928	Y92H12A.2		chrI	630466
chrI	641104	Y65B4A.2		chrI	1545930	Y92H12A.2		chrI	630485
chrI	652712	Y65B4A.2		chrI	1545965	Y92H12A.2		chrI	630494
chrI	653073	Y65B4A.2		chrI	1546244	Y92H12A.2		chrI	630496
chrI	662109	Y65B4A.8		chrI	1554045	Y92H12A.2		chrI	630498
chrI	662316	Y65B4A.8		chrI	1554046	Y92H12A.2		chrI	630503
chrI	663098	Y65B4A.8		chrI	1554057	Y92H12A.2		chrI	630505
chrI	669397	Y18H1A.14		chrI	1554190	Y92H12A.2		chrI	630511
chrI	676265			chrI	1565655			chrI	630513
chrI	676268			chrI	1565669			chrI	630519
chrI	676280			chrI	1566588			chrI	630520
chrI	676318			chrI	1566649			chrI	630521
chrI	676328			chrI	1566650			chrI	630522
chrI	676342			chrI	1569211	Y92H12A.1		chrI	630523
chrI	676368			chrI	1570235	Y92H12A.1		chrI	630524
chrI	676407			chrI	1576483	Y92H12A.1		chrI	630525
chrI	676506			chrI	1577114	Y92H12A.1		chrI	630526
chrI	676510			chrI	1577135	Y92H12A.1		chrI	630529
chrI	676513			chrI	1577136	Y92H12A.1		chrI	630531
chrI	676521			chrI	1577183	Y92H12A.1		chrI	630533
chrI	676529			chrI	1577195	Y92H12A.1		chrI	630534
chrI	676535			chrI	1577225	Y92H12A.1		chrI	630535
chrI	676543			chrI	1577226	Y92H12A.1		chrI	630537
chrI	676555			chrI	1631218	Y73E7A.1		chrI	630549
chrI	676556			chrI	1631246	Y73E7A.1		chrI	630551
chrI	676558			chrI	1631297	Y73E7A.1		chrI	630553
chrI	676561			chrI	1631301	Y73E7A.1		chrI	630567
chrI	676562			chrI	1631512	Y73E7A.1		chrI	630579
chrI	676574			chrI	1631513	Y73E7A.1		chrI	630588
chrI	676575			chrI	1647349	Y71G12B.20		chrI	630596
chrI	676586			chrI	1647350	Y71G12B.20		chrI	630597
chrI	676609			chrI	1647386	Y71G12B.20		chrI	630598
chrI	676610			chrI	1647398	Y71G12B.20		chrI	630599
chrI	676632			chrI	1647430	Y71G12B.20		chrI	630606
chrI	676640			chrI	1674400	Y71G12B.35		chrI	630610
chrI	676647			chrI	1674404	Y71G12B.35		chrI	630617
chrI	676654			chrI	1674405	Y71G12B.35		chrI	630620
chrI	676655			chrI	1674451	Y71G12B.35		chrI	630621
chrI	676728			chrI	1674452	Y71G12B.35		chrI	630626
chrI	676764			chrI	1686782	Y71G12B.31		chrI	630647
chrI	677023			chrI	1686805	Y71G12B.31		chrI	630648
chrI	677034			chrI	1695753			chrI	630649
chrI	677039			chrI	1695754			chrI	630654
chrI	677054			chrI	1696058			chrI	630655
chrI	677086			chrI	1696396			chrI	630657
chrI	677378			chrI	1696420			chrI	630659
chrI	677480			chrI	1696463			chrI	630671
chrI	677932			chrI	1696537			chrI	630680
chrI	677942			chrI	1696555			chrI	630681
chrI	677952			chrI	1696580			chrI	630684
chrI	677983			chrI	1696604			chrI	630685
chrI	678026			chrI	1696605			chrI	630694
chrI	678032			chrI	1696616			chrI	630695
chrI	678052			chrI	1696734			chrI	630696
chrI	678063			chrI	1696764			chrI	630698
chrI	678066			chrI	1697224			chrI	630739
chrI	678225			chrI	1697233			chrI	630740
chrI	678226			chrI	1697328			chrI	630771
chrI	678237			chrI	1697344			chrI	630777
chrI	678402			chrI	1697349			chrI	630780
chrI	678409			chrI	1697359			chrI	630781
chrI	678441			chrI	1697605			chrI	630782
chrI	678456			chrI	1697702			chrI	630784
chrI	678461			chrI	1697727			chrI	630785
chrI	678472			chrI	1699578	Y71G12B.15		chrI	630799
chrI	678731			chrI	1699579	Y71G12B.15		chrI	630800
chrI	678805			chrI	1703868	Y71G12B.13		chrI	630811
chrI	678938			chrI	1706381	Y71G12B.13		chrI	630824
chrI	678953			chrI	1706670	Y71G12B.13		chrI	630825
chrI	678965			chrI	1706671	Y71G12B.13		chrI	630828
chrI	678982			chrI	1706802	Y71G12B.13		chrI	630834
chrI	678983			chrI	1706805	Y71G12B.13		chrI	630837
chrI	678997			chrI	1706814	Y71G12B.13		chrI	630838
chrI	679041			chrI	1706815	Y71G12B.13		chrI	630839
chrI	679066			chrI	1706824	Y71G12B.13		chrI	630840
chrI	679071			chrI	1706833	Y71G12B.13		chrI	630843
chrI	679072			chrI	1716750			chrI	630844
chrI	679131			chrI	1718670			chrI	630851
chrI	679148			chrI	1718671			chrI	630852
chrI	679158			chrI	1741800	Y71G12B.24		chrI	630856
chrI	679164			chrI	1741825	Y71G12B.24		chrI	630859
chrI	679171			chrI	1741902	Y71G12B.24		chrI	630860
chrI	679176			chrI	1741932	Y71G12B.24		chrI	630870
chrI	679177			chrI	1743201	Y71G12B.24		chrI	630871
chrI	679184			chrI	1744920	Y71G12B.24		chrI	630872
chrI	679186			chrI	1751939	Y71G12B.10		chrI	630897
chrI	679192			chrI	1751954	Y71G12B.10		chrI	630899
chrI	679196			chrI	1751959	Y71G12B.10		chrI	630906
chrI	679199			chrI	1751961	Y71G12B.10		chrI	630912
chrI	679200			chrI	1751973	Y71G12B.10		chrI	630913
chrI	679203			chrI	1751974	Y71G12B.10		chrI	630917
chrI	679207			chrI	1751983	Y71G12B.10		chrI	630932
chrI	679220			chrI	1752000	Y71G12B.10		chrI	630935
chrI	679221			chrI	1752007	Y71G12B.10		chrI	630938
chrI	679222			chrI	1752012	Y71G12B.10		chrI	630939
chrI	679223			chrI	1752022	Y71G12B.10		chrI	630944
chrI	679236			chrI	1752266	Y71G12B.10		chrI	630957
chrI	679237			chrI	1752301	Y71G12B.10		chrI	630966
chrI	679347			chrI	1752302	Y71G12B.10		chrI	630995
chrI	679362			chrI	1752332	Y71G12B.10		chrI	630997
chrI	695810	Y18H1A.2		chrI	1752369	Y71G12B.10		chrI	631000
chrI	696229	Y18H1A.2		chrI	1752427	Y71G12B.10		chrI	631003
chrI	705541	Y18H1A.3		chrI	1752434	Y71G12B.10		chrI	631007
chrI	705551	Y18H1A.3		chrI	1752441	Y71G12B.10		chrI	631013
chrI	705584	Y18H1A.3		chrI	1752457	Y71G12B.10		chrI	631014
chrI	705599	Y18H1A.3		chrI	1752463	Y71G12B.10		chrI	631107	Y65B4A.6
chrI	705646	Y18H1A.3		chrI	1752464	Y71G12B.10		chrI	633203	Y65B4A.6
chrI	705666	Y18H1A.3		chrI	1752465	Y71G12B.10		chrI	633209	Y65B4A.6
chrI	705675	Y18H1A.3		chrI	1752466	Y71G12B.10		chrI	633235	Y65B4A.6
chrI	705690	Y18H1A.3		chrI	1752468	Y71G12B.10		chrI	633236	Y65B4A.6
chrI	705693	Y18H1A.3		chrI	1752471	Y71G12B.10		chrI	633352	Y65B4A.6
chrI	705695	Y18H1A.3		chrI	1752473	Y71G12B.10		chrI	634451	Y65B4A.6
chrI	706044	Y18H1A.3		chrI	1752475	Y71G12B.10		chrI	636063	Y65B4A.6
chrI	706053	Y18H1A.3		chrI	1752476	Y71G12B.10		chrI	636086	Y65B4A.6
chrI	706217	Y18H1A.3		chrI	1752504	Y71G12B.10		chrI	639906	Y65B4A.2
chrI	706257	Y18H1A.3		chrI	1753617	Y71G12B.10		chrI	639908	Y65B4A.2
chrI	706270	Y18H1A.3		chrI	1753692	Y71G12B.10		chrI	639919	Y65B4A.2
chrI	706275	Y18H1A.3		chrI	1753878	Y71G12B.10		chrI	639941	Y65B4A.2
chrI	706276	Y18H1A.3		chrI	1776478	Y71G12B.8		chrI	639956	Y65B4A.2
chrI	706278	Y18H1A.3		chrI	1785836	Y71G12B.8		chrI	639978	Y65B4A.2
chrI	706284	Y18H1A.3		chrI	1821891	Y71G12B.30		chrI	639991	Y65B4A.2
chrI	706301	Y18H1A.3		chrI	1825208	Y71G12B.1		chrI	640003	Y65B4A.2
chrI	706309	Y18H1A.3		chrI	1825248	Y71G12B.1		chrI	640005	Y65B4A.2
chrI	706332	Y18H1A.3		chrI	1864219	M01D7.2		chrI	640047	Y65B4A.2
chrI	706338	Y18H1A.3		chrI	1864220	M01D7.2		chrI	640053	Y65B4A.2
chrI	706342	Y18H1A.3		chrI	1864226	M01D7.2		chrI	640054	Y65B4A.2
chrI	706359	Y18H1A.3		chrI	1864367	M01D7.2		chrI	642631	Y65B4A.2
chrI	707027	Y18H1A.3		chrI	1878323	Y71G12A.3		chrI	642746	Y65B4A.2
chrI	707210	Y18H1A.3		chrI	1878328	Y71G12A.3		chrI	643542	Y65B4A.2
chrI	707222	Y18H1A.3		chrI	1882368	Y71G12A.3		chrI	643549	Y65B4A.2
chrI	710385	Y18H1A.3		chrI	1882395	Y71G12A.3		chrI	643569	Y65B4A.2
chrI	710386	Y18H1A.3		chrI	1900532	Y71G12A.2		chrI	643580	Y65B4A.2
chrI	710408	Y18H1A.3		chrI	1900864	Y71G12A.2		chrI	652159	Y65B4A.2
chrI	710419	Y18H1A.3		chrI	1905030	Y71G12A.2		chrI	652320	Y65B4A.2
chrI	710420	Y18H1A.3		chrI	1905031	Y71G12A.2		chrI	652693	Y65B4A.2
chrI	710464	Y18H1A.3		chrI	1912588	Y51F10.7		chrI	652699	Y65B4A.2
chrI	710474	Y18H1A.3		chrI	1912593	Y51F10.7		chrI	652717	Y65B4A.2
chrI	710481	Y18H1A.3		chrI	1912612	Y51F10.7		chrI	652850	Y65B4A.2
chrI	710562	Y18H1A.3		chrI	1912631	Y51F10.7		chrI	654920	Y65B4A.1
chrI	710692	Y18H1A.3		chrI	1912632	Y51F10.7		chrI	655212	Y65B4A.1
chrI	710743	Y18H1A.3		chrI	1912867	Y51F10.7		chrI	655247	Y65B4A.1
chrI	710754	Y18H1A.3		chrI	1912895	Y51F10.7		chrI	655261	Y65B4A.1
chrI	710755	Y18H1A.3		chrI	1913222	Y51F10.7		chrI	655384	Y65B4A.1
chrI	710777	Y18H1A.3		chrI	1913256	Y51F10.7		chrI	655385	Y65B4A.1
chrI	710849	Y18H1A.3		chrI	1915458			chrI	655463	Y65B4A.1
chrI	713721	Y18H1A.3		chrI	1915480			chrI	655464	Y65B4A.1
chrI	713722	Y18H1A.3		chrI	1915484			chrI	655466	Y65B4A.1
chrI	713724	Y18H1A.3		chrI	1915505			chrI	655476	Y65B4A.1
chrI	713743	Y18H1A.3		chrI	1915510			chrI	655481	Y65B4A.1
chrI	713783	Y18H1A.3		chrI	1915670			chrI	656012	Y65B4A.1
chrI	713945	Y18H1A.3		chrI	1915686			chrI	656458	Y65B4A.1
chrI	713967	Y18H1A.3		chrI	1915738			chrI	656495	Y65B4A.1
chrI	713974	Y18H1A.3		chrI	1915740			chrI	656497	Y65B4A.1
chrI	713992	Y18H1A.3		chrI	1915741			chrI	656498	Y65B4A.1
chrI	714009	Y18H1A.3		chrI	1916398			chrI	659739	Y65B4A.8
chrI	714010	Y18H1A.3		chrI	1916407			chrI	659740	Y65B4A.8
chrI	714133	Y18H1A.3		chrI	1917188	Y51F10.6		chrI	659743	Y65B4A.8
chrI	714165	Y18H1A.3		chrI	1917200	Y51F10.6		chrI	659747	Y65B4A.8
chrI	714311	Y18H1A.3		chrI	1917213	Y51F10.6		chrI	659750	Y65B4A.8
chrI	714320	Y18H1A.3		chrI	1917222	Y51F10.6		chrI	659751	Y65B4A.8
chrI	714329	Y18H1A.3		chrI	1917223	Y51F10.6		chrI	659760	Y65B4A.8
chrI	714330	Y18H1A.3		chrI	1917271	Y51F10.6		chrI	659761	Y65B4A.8
chrI	714387	Y18H1A.3		chrI	1917272	Y51F10.6		chrI	659765	Y65B4A.8
chrI	714398	Y18H1A.3		chrI	1917276	Y51F10.6		chrI	659772	Y65B4A.8
chrI	714399	Y18H1A.3		chrI	1917304	Y51F10.6		chrI	659773	Y65B4A.8
chrI	714551	Y18H1A.3		chrI	1917381	Y51F10.6		chrI	659777	Y65B4A.8
chrI	714557	Y18H1A.3		chrI	1917391	Y51F10.6		chrI	659781	Y65B4A.8
chrI	714558	Y18H1A.3		chrI	1917437	Y51F10.6		chrI	659784	Y65B4A.8
chrI	714561	Y18H1A.3		chrI	1917524	Y51F10.6		chrI	659786	Y65B4A.8
chrI	718468	Y18H1A.7		chrI	1917591	Y51F10.6		chrI	659794	Y65B4A.8
chrI	720359	Y18H1A.6		chrI	1917615	Y51F10.6		chrI	659795	Y65B4A.8
chrI	725840	Y18H1A.6		chrI	1917629	Y51F10.6		chrI	659799	Y65B4A.8
chrI	727376	Y18H1A.6		chrI	1917630	Y51F10.6		chrI	659803	Y65B4A.8
chrI	727382	Y18H1A.6		chrI	1917646	Y51F10.6		chrI	659804	Y65B4A.8
chrI	727410	Y18H1A.6		chrI	1917656	Y51F10.6		chrI	659805	Y65B4A.8
chrI	727412	Y18H1A.6		chrI	1918667	Y51F10.6		chrI	659856	Y65B4A.8
chrI	727413	Y18H1A.6		chrI	1918762	Y51F10.6		chrI	659857	Y65B4A.8
chrI	727419	Y18H1A.6		chrI	1918786	Y51F10.6		chrI	659862	Y65B4A.8
chrI	727420	Y18H1A.6		chrI	1918796	Y51F10.6		chrI	659866	Y65B4A.8
chrI	727440	Y18H1A.6		chrI	1918812	Y51F10.6		chrI	659867	Y65B4A.8
chrI	727456	Y18H1A.6		chrI	1939783	Y51F10.4		chrI	659870	Y65B4A.8
chrI	727473	Y18H1A.6		chrI	1940770	Y51F10.4		chrI	659874	Y65B4A.8
chrI	727493	Y18H1A.6		chrI	1951603	Y51F10.10		chrI	659875	Y65B4A.8
chrI	728084	Y18H1A.6		chrI	1951608	Y51F10.10		chrI	659880	Y65B4A.8
chrI	728089	Y18H1A.6		chrI	1951640	Y51F10.10		chrI	659885	Y65B4A.8
chrI	728440	Y18H1A.6		chrI	1951641	Y51F10.10		chrI	659886	Y65B4A.8
chrI	728453	Y18H1A.6		chrI	1951659	Y51F10.10		chrI	659887	Y65B4A.8
chrI	728457	Y18H1A.6		chrI	1951666	Y51F10.10		chrI	659888	Y65B4A.8
chrI	728458	Y18H1A.6		chrI	1951688	Y51F10.10		chrI	659889	Y65B4A.8
chrI	728459	Y18H1A.6		chrI	1951700	Y51F10.10		chrI	659896	Y65B4A.8
chrI	728460	Y18H1A.6		chrI	1951701	Y51F10.10		chrI	659900	Y65B4A.8
chrI	728522	Y18H1A.6		chrI	1951742	Y51F10.10		chrI	659901	Y65B4A.8
chrI	728523	Y18H1A.6		chrI	1951743	Y51F10.10		chrI	659904	Y65B4A.8
chrI	728543	Y18H1A.6		chrI	1951753	Y51F10.10		chrI	659905	Y65B4A.8
chrI	728670	Y18H1A.6		chrI	1954307	Y51F10.10		chrI	659910	Y65B4A.8
chrI	729750	Y18H1A.6		chrI	1954441	Y51F10.10		chrI	659911	Y65B4A.8
chrI	729751	Y18H1A.6		chrI	1954464	Y51F10.10		chrI	659914	Y65B4A.8
chrI	729752	Y18H1A.6		chrI	1974522			chrI	659917	Y65B4A.8
chrI	729753	Y18H1A.6		chrI	1974528			chrI	659918	Y65B4A.8
chrI	729815	Y18H1A.6		chrI	1975194			chrI	659920	Y65B4A.8
chrI	729816	Y18H1A.6		chrI	1975263			chrI	659921	Y65B4A.8
chrI	729836	Y18H1A.6		chrI	1975327			chrI	659922	Y65B4A.8
chrI	729915	Y18H1A.6		chrI	1975328			chrI	659934	Y65B4A.8
chrI	729916	Y18H1A.6		chrI	1975988			chrI	659937	Y65B4A.8
chrI	729937	Y18H1A.6		chrI	1976001			chrI	660153	Y65B4A.8
chrI	729944	Y18H1A.6		chrI	1976007			chrI	660198	Y65B4A.8
chrI	729961	Y18H1A.6		chrI	1976008			chrI	660416	Y65B4A.8
chrI	729962	Y18H1A.6		chrI	1976035			chrI	660433	Y65B4A.8
chrI	729963	Y18H1A.6		chrI	1976046			chrI	660451	Y65B4A.8
chrI	729969	Y18H1A.6		chrI	1976053			chrI	661347	Y65B4A.8
chrI	729972	Y18H1A.6		chrI	1976119			chrI	661353	Y65B4A.8
chrI	729983	Y18H1A.6		chrI	1976121			chrI	661429	Y65B4A.8
chrI	729984	Y18H1A.6		chrI	1976126			chrI	661493	Y65B4A.8
chrI	729985	Y18H1A.6		chrI	1976144			chrI	662129	Y65B4A.8
chrI	730000	Y18H1A.6		chrI	1976150			chrI	662130	Y65B4A.8
chrI	730006	Y18H1A.6		chrI	1976151			chrI	662145	Y65B4A.8
chrI	740698			chrI	1976182			chrI	662146	Y65B4A.8
chrI	743894	Y18H1A.13		chrI	1993781	Y20F4.3		chrI	662151	Y65B4A.8
chrI	743908	Y18H1A.13		chrI	1993786	Y20F4.3		chrI	662162	Y65B4A.8
chrI	745299	Y18H1A.13		chrI	2008080	Y20F4.3		chrI	662163	Y65B4A.8
chrI	752090	Y18H1A.9		chrI	2033869	Y20F4.2		chrI	662181	Y65B4A.8
chrI	754316	Y18H1A.9		chrI	2033881	Y20F4.2		chrI	662191	Y65B4A.8
chrI	755715	Y18H1A.9		chrI	2033884	Y20F4.2		chrI	662192	Y65B4A.8
chrI	755728	Y18H1A.9		chrI	2033891	Y20F4.2		chrI	662193	Y65B4A.8
chrI	755744	Y18H1A.9		chrI	2033896	Y20F4.2		chrI	662194	Y65B4A.8
chrI	756425	Y18H1A.9		chrI	2033914	Y20F4.2		chrI	662200	Y65B4A.8
chrI	756427	Y18H1A.9		chrI	2034040			chrI	662221	Y65B4A.8
chrI	805649	ZC123.3		chrI	2034074			chrI	662232	Y65B4A.8
chrI	830632	ZC123.3		chrI	2034075			chrI	662233	Y65B4A.8
chrI	836566			chrI	2034078			chrI	662234	Y65B4A.8
chrI	836568			chrI	2034087			chrI	662235	Y65B4A.8
chrI	836597			chrI	2034088			chrI	662237	Y65B4A.8
chrI	836707			chrI	2034871	Y20F4.4		chrI	662244	Y65B4A.8
chrI	836711			chrI	2039744	Y20F4.4		chrI	662249	Y65B4A.8
chrI	836712			chrI	2039758	Y20F4.4		chrI	662250	Y65B4A.8
chrI	836720			chrI	2044207			chrI	662259	Y65B4A.8
chrI	836765			chrI	2044610			chrI	662260	Y65B4A.8
chrI	836780			chrI	2044633			chrI	662267	Y65B4A.8
chrI	836956			chrI	2044649			chrI	662268	Y65B4A.8
chrI	836957			chrI	2056350			chrI	663374	Y65B4A.8
chrI	836994			chrI	2056370			chrI	663380	Y65B4A.8
chrI	836995			chrI	2056378			chrI	677015
chrI	837016			chrI	2056379			chrI	677018
chrI	837033			chrI	2056380			chrI	677019
chrI	837034			chrI	2056381			chrI	677020
chrI	837038			chrI	2056401			chrI	677021
chrI	837042			chrI	2056408			chrI	677025
chrI	837051			chrI	2056456			chrI	677032
chrI	837301			chrI	2056478			chrI	677040
chrI	855732	Y95B8A.7		chrI	2056491			chrI	677041
chrI	855776	Y95B8A.7		chrI	2056499			chrI	677047
chrI	856155	Y95B8A.7		chrI	2056572			chrI	677307
chrI	859508	Y95B8A.7		chrI	2056573			chrI	677311
chrI	859628	Y95B8A.7		chrI	2056578			chrI	677312
chrI	859629	Y95B8A.7		chrI	2056620			chrI	677316
chrI	859912	Y95B8A.7		chrI	2056654			chrI	677321
chrI	859924	Y95B8A.7		chrI	2056655			chrI	677322
chrI	860201	Y95B8A.7		chrI	2056673			chrI	677329
chrI	860202	Y95B8A.7		chrI	2056674			chrI	677331
chrI	860214	Y95B8A.7		chrI	2056721			chrI	677332
chrI	862519	Y95B8A.7		chrI	2056722			chrI	677344
chrI	862520	Y95B8A.7		chrI	2056789			chrI	677345
chrI	862525	Y95B8A.7		chrI	2056819			chrI	677351
chrI	862526	Y95B8A.7		chrI	2056847			chrI	677352
chrI	862542	Y95B8A.7		chrI	2056859			chrI	677353
chrI	862549	Y95B8A.7		chrI	2056867			chrI	677354
chrI	862779	Y95B8A.7		chrI	2060131			chrI	677358
chrI	862894	Y95B8A.7		chrI	2060132			chrI	677359
chrI	862897	Y95B8A.7		chrI	2060162			chrI	677360
chrI	862898	Y95B8A.7		chrI	2060176			chrI	677361
chrI	862934	Y95B8A.7		chrI	2060191			chrI	677368
chrI	862935	Y95B8A.7		chrI	2060192			chrI	677375
chrI	862936	Y95B8A.7		chrI	2060201			chrI	677407
chrI	862942	Y95B8A.7		chrI	2060259			chrI	677413
chrI	862943	Y95B8A.7		chrI	2060260			chrI	677419
chrI	862944	Y95B8A.7		chrI	2060307			chrI	677867
chrI	862949	Y95B8A.7		chrI	2060308			chrI	677876
chrI	862950	Y95B8A.7		chrI	2060326			chrI	677882
chrI	862959	Y95B8A.7		chrI	2060327			chrI	677897
chrI	862963	Y95B8A.7		chrI	2060361			chrI	677911
chrI	862964	Y95B8A.7		chrI	2060403			chrI	677925
chrI	862965	Y95B8A.7		chrI	2060467			chrI	677926
chrI	862966	Y95B8A.7		chrI	2060479			chrI	677929
chrI	862971	Y95B8A.7		chrI	2060482			chrI	677971
chrI	862982	Y95B8A.7		chrI	2060490			chrI	677986
chrI	863183	Y95B8A.7		chrI	2060503			chrI	678006
chrI	863587	Y95B8A.7		chrI	2060512			chrI	678055
chrI	863618	Y95B8A.7		chrI	2060544			chrI	678062
chrI	863854	Y95B8A.7		chrI	2060562			chrI	678076
chrI	864285	Y95B8A.7		chrI	2060582			chrI	678099
chrI	867851	Y95B8A.7		chrI	2060588			chrI	678100
chrI	867888	Y95B8A.7		chrI	2060624			chrI	678106
chrI	867919	Y95B8A.7		chrI	2062153	Y37E3.1		chrI	678136
chrI	868355	Y95B8A.7		chrI	2062156	Y37E3.1		chrI	678137
chrI	868386	Y95B8A.7		chrI	2062163	Y37E3.1		chrI	678141
chrI	868423	Y95B8A.7		chrI	2062185	Y37E3.1		chrI	678448
chrI	868524	Y95B8A.7		chrI	2062195	Y37E3.1		chrI	678454
chrI	868527	Y95B8A.7		chrI	2062205	Y37E3.1		chrI	678455
chrI	868537	Y95B8A.7		chrI	2062263	Y37E3.1		chrI	678463
chrI	868538	Y95B8A.7		chrI	2062276	Y37E3.1		chrI	678470
chrI	868542	Y95B8A.7		chrI	2062305	Y37E3.1		chrI	678528
chrI	868550	Y95B8A.7		chrI	2062306	Y37E3.1		chrI	678529
chrI	868551	Y95B8A.7		chrI	2062395	Y37E3.1		chrI	678530
chrI	868554	Y95B8A.7		chrI	2062409	Y37E3.1		chrI	678532
chrI	868555	Y95B8A.7		chrI	2062422	Y37E3.1		chrI	678535
chrI	869687	Y95B8A.7		chrI	2062649	Y37E3.1		chrI	678536
chrI	869700	Y95B8A.7		chrI	2062654	Y37E3.1		chrI	678543
chrI	869841	Y95B8A.7		chrI	2062666	Y37E3.1		chrI	678550
chrI	869983	Y95B8A.7		chrI	2062667	Y37E3.1		chrI	678553
chrI	870104	Y95B8A.7		chrI	2062677	Y37E3.1		chrI	678554
chrI	889480	Y95B8A.6		chrI	2062689	Y37E3.1		chrI	678556
chrI	894515	Y95B8A.11		chrI	2072891	Y37E3.10		chrI	678559
chrI	901415	Y95B8A.5		chrI	2072906	Y37E3.10		chrI	678561
chrI	901518	Y95B8A.5		chrI	2072918	Y37E3.10		chrI	678563
chrI	901588	Y95B8A.5		chrI	2072919	Y37E3.10		chrI	678567
chrI	901737	Y95B8A.5		chrI	2073332	Y37E3.10		chrI	678572
chrI	901746	Y95B8A.5		chrI	2076412	Y37E3.10		chrI	678578
chrI	901755	Y95B8A.5		chrI	2076415	Y37E3.10		chrI	678579
chrI	901833	Y95B8A.5		chrI	2076420	Y37E3.10		chrI	678587
chrI	901838	Y95B8A.5		chrI	2076485	Y37E3.10		chrI	678595
chrI	901840	Y95B8A.5		chrI	2076489	Y37E3.10		chrI	678597
chrI	901841	Y95B8A.5		chrI	2076610	Y37E3.10		chrI	678664
chrI	901845	Y95B8A.5		chrI	2076613	Y37E3.10		chrI	678710
chrI	901848	Y95B8A.5		chrI	2076623	Y37E3.10		chrI	678723
chrI	901857	Y95B8A.5		chrI	2076632	Y37E3.10		chrI	678742
chrI	901870	Y95B8A.5		chrI	2076633	Y37E3.10		chrI	678750
chrI	901881	Y95B8A.5		chrI	2076642	Y37E3.10		chrI	678761
chrI	901898	Y95B8A.5		chrI	2076643	Y37E3.10		chrI	678765
chrI	901903	Y95B8A.5		chrI	2076647	Y37E3.10		chrI	678768
chrI	901912	Y95B8A.5		chrI	2076648	Y37E3.10		chrI	678770
chrI	901913	Y95B8A.5		chrI	2076705	Y37E3.10		chrI	678773
chrI	901950	Y95B8A.5		chrI	2076769	Y37E3.10		chrI	678780
chrI	901951	Y95B8A.5		chrI	2077645			chrI	678788
chrI	901972	Y95B8A.5		chrI	2077983			chrI	678809
chrI	902077	Y95B8A.5		chrI	2078011			chrI	678916
chrI	903249	Y95B8A.5		chrI	2078447			chrI	678995
chrI	903321	Y95B8A.5		chrI	2078748			chrI	679007
chrI	904911	Y95B8A.5		chrI	2078749			chrI	679010
chrI	904912	Y95B8A.5		chrI	2080298	Y37E3.11		chrI	679013
chrI	904924	Y95B8A.5		chrI	2080558	Y37E3.11		chrI	679018
chrI	904934	Y95B8A.5		chrI	2080559	Y37E3.11		chrI	679031
chrI	904935	Y95B8A.5		chrI	2080570	Y37E3.11		chrI	679047
chrI	904941	Y95B8A.5		chrI	2080617	Y37E3.11		chrI	679061
chrI	905005	Y95B8A.5		chrI	2081475	Y37E3.11		chrI	679062
chrI	905038	Y95B8A.5		chrI	2081478	Y37E3.11		chrI	679064
chrI	905039	Y95B8A.5		chrI	2081674	Y37E3.11		chrI	679076
chrI	905048	Y95B8A.5		chrI	2081689	Y37E3.11		chrI	679084
chrI	905055	Y95B8A.5		chrI	2081719	Y37E3.11		chrI	679092
chrI	905064	Y95B8A.5		chrI	2081767	Y37E3.11		chrI	679098
chrI	905114	Y95B8A.5		chrI	2081768	Y37E3.11		chrI	679103
chrI	905115	Y95B8A.5		chrI	2081777	Y37E3.11		chrI	679106
chrI	905117	Y95B8A.5		chrI	2081839	Y37E3.11		chrI	679107
chrI	905120	Y95B8A.5		chrI	2081893	Y37E3.11		chrI	679114
chrI	905126	Y95B8A.5		chrI	2082406	Y37E3.11		chrI	679121
chrI	905127	Y95B8A.5		chrI	2082418	Y37E3.11		chrI	679147
chrI	905133	Y95B8A.5		chrI	2082419	Y37E3.11		chrI	679156
chrI	905135	Y95B8A.5		chrI	2082432	Y37E3.11		chrI	679157
chrI	905144	Y95B8A.5		chrI	2082433	Y37E3.11		chrI	679160
chrI	905145	Y95B8A.5		chrI	2082440	Y37E3.11		chrI	679167
chrI	905227	Y95B8A.5		chrI	2082450	Y37E3.11		chrI	679169
chrI	905237	Y95B8A.5		chrI	2082457	Y37E3.11		chrI	679250
chrI	905238	Y95B8A.5		chrI	2082458	Y37E3.11		chrI	679251
chrI	905276	Y95B8A.5		chrI	2082470	Y37E3.11		chrI	679264
chrI	905285	Y95B8A.5		chrI	2082499	Y37E3.11		chrI	679279
chrI	905288	Y95B8A.5		chrI	2082503	Y37E3.11		chrI	679285
chrI	905289	Y95B8A.5		chrI	2082504	Y37E3.11		chrI	679303
chrI	905298	Y95B8A.5		chrI	2082510	Y37E3.11		chrI	679315
chrI	905300	Y95B8A.5		chrI	2082517	Y37E3.11		chrI	679319
chrI	905308	Y95B8A.5		chrI	2082625	Y37E3.11		chrI	679320
chrI	905344	Y95B8A.5		chrI	2082640	Y37E3.11		chrI	679321
chrI	905348	Y95B8A.5		chrI	2082663	Y37E3.11		chrI	679332
chrI	905349	Y95B8A.5		chrI	2082670	Y37E3.11		chrI	679334
chrI	905357	Y95B8A.5		chrI	2082672	Y37E3.11		chrI	679403
chrI	905358	Y95B8A.5		chrI	2082673	Y37E3.11		chrI	679404
chrI	905371	Y95B8A.5		chrI	2082683	Y37E3.11		chrI	679424
chrI	905376	Y95B8A.5		chrI	2082694	Y37E3.11		chrI	679727
chrI	905377	Y95B8A.5		chrI	2082698	Y37E3.11		chrI	679740
chrI	905387	Y95B8A.5		chrI	2082700	Y37E3.11		chrI	682009	Y18H1A.11
chrI	905390	Y95B8A.5		chrI	2082703	Y37E3.11		chrI	682019	Y18H1A.11
chrI	905391	Y95B8A.5		chrI	2082727	Y37E3.11		chrI	682027	Y18H1A.11
chrI	905399	Y95B8A.5		chrI	2085978	Y37E3.13		chrI	682032	Y18H1A.11
chrI	905400	Y95B8A.5		chrI	2086567	Y37E3.13		chrI	682040	Y18H1A.11
chrI	905407	Y95B8A.5		chrI	2086591	Y37E3.13		chrI	682048	Y18H1A.11
chrI	905410	Y95B8A.5		chrI	2086599	Y37E3.13		chrI	682053	Y18H1A.11
chrI	905462	Y95B8A.5		chrI	2098032	Y37E3.15		chrI	682063	Y18H1A.11
chrI	905512	Y95B8A.5		chrI	2098042	Y37E3.15		chrI	682065	Y18H1A.11
chrI	905529	Y95B8A.5		chrI	2100395	Y37E3.15		chrI	682066	Y18H1A.11
chrI	905535	Y95B8A.5		chrI	2110989	Y37E3.15		chrI	682070	Y18H1A.11
chrI	905544	Y95B8A.5		chrI	2111157	Y37E3.15		chrI	682086	Y18H1A.11
chrI	905546	Y95B8A.5		chrI	2122207	Y37E3.15		chrI	682095	Y18H1A.11
chrI	905613	Y95B8A.5		chrI	2122208	Y37E3.15		chrI	682096	Y18H1A.11
chrI	905614	Y95B8A.5		chrI	2122360	Y37E3.15		chrI	682098	Y18H1A.11
chrI	905617	Y95B8A.5		chrI	2125889			chrI	692301	Y18H1A.4
chrI	909588	Y95B8A.4		chrI	2129058	Y37E3.17		chrI	695297	Y18H1A.2
chrI	918381	Y95B8A.12		chrI	2129087	Y37E3.17		chrI	695688	Y18H1A.2
chrI	950138	Y34D9B.1		chrI	2129161	Y37E3.17		chrI	695695	Y18H1A.2
chrI	950306	Y34D9B.1		chrI	2129174	Y37E3.17		chrI	696276	Y18H1A.2
chrI	967128	F54A5.2		chrI	2129523	Y37E3.17		chrI	696277	Y18H1A.2
chrI	967129	F54A5.2		chrI	2129524	Y37E3.17		chrI	696278	Y18H1A.2
chrI	967172	F54A5.2		chrI	2129556	Y37E3.17		chrI	696290	Y18H1A.2
chrI	967237	F54A5.2		chrI	2129651	Y37E3.17		chrI	696325	Y18H1A.2
chrI	974014			chrI	2129654	Y37E3.17		chrI	696340	Y18H1A.2
chrI	974024			chrI	2143734	Y37E3.17		chrI	696352	Y18H1A.2
chrI	974124			chrI	2143746	Y37E3.17		chrI	701992	Y18H1A.3
chrI	974134			chrI	2204723	W03F11.6		chrI	701995	Y18H1A.3
chrI	974234			chrI	2213023			chrI	701996	Y18H1A.3
chrI	974245			chrI	2213051			chrI	702007	Y18H1A.3
chrI	974821			chrI	2213071			chrI	702012	Y18H1A.3
chrI	1002173			chrI	2213791			chrI	702017	Y18H1A.3
chrI	1002178			chrI	2213804			chrI	702036	Y18H1A.3
chrI	1009987	C54G6.2		chrI	2213810			chrI	702037	Y18H1A.3
chrI	1012101	C54G6.1		chrI	2213811			chrI	702038	Y18H1A.3
chrI	1012119	C54G6.1		chrI	2279597			chrI	702039	Y18H1A.3
chrI	1012130	C54G6.1		chrI	2279608			chrI	702040	Y18H1A.3
chrI	1012714	C54G6.1		chrI	2279702			chrI	702043	Y18H1A.3
chrI	1012749	C54G6.1		chrI	2284532	Y39G10AL.3		chrI	702047	Y18H1A.3
chrI	1012959	C54G6.1		chrI	2288083	Y39G10AL.3		chrI	702053	Y18H1A.3
chrI	1012994	C54G6.1		chrI	2296048	Y39G10AR.11		chrI	702098	Y18H1A.3
chrI	1013029	C54G6.1		chrI	2296092	Y39G10AR.11		chrI	702111	Y18H1A.3
chrI	1014843			chrI	2296093	Y39G10AR.11		chrI	702114	Y18H1A.3
chrI	1051818	Y34D9A.8		chrI	2296717	Y39G10AR.11		chrI	702115	Y18H1A.3
chrI	1051836	Y34D9A.8		chrI	2296720	Y39G10AR.11		chrI	702116	Y18H1A.3
chrI	1052030	Y34D9A.8		chrI	2296733	Y39G10AR.11		chrI	702117	Y18H1A.3
chrI	1056584	Y34D9A.10		chrI	2296737	Y39G10AR.11		chrI	702132	Y18H1A.3
chrI	1058037	Y34D9A.10		chrI	2296760	Y39G10AR.11		chrI	702136	Y18H1A.3
chrI	1058084	Y34D9A.10		chrI	2296761	Y39G10AR.11		chrI	702137	Y18H1A.3
chrI	1058085	Y34D9A.10		chrI	2296765	Y39G10AR.11		chrI	702767	Y18H1A.3
chrI	1058116	Y34D9A.10		chrI	2296772	Y39G10AR.11		chrI	704079	Y18H1A.3
chrI	1058176	Y34D9A.10		chrI	2296773	Y39G10AR.11		chrI	705547	Y18H1A.3
chrI	1058186	Y34D9A.10		chrI	2296787	Y39G10AR.11		chrI	705549	Y18H1A.3
chrI	1058197	Y34D9A.10		chrI	2296922	Y39G10AR.11		chrI	705550	Y18H1A.3
chrI	1058198	Y34D9A.10		chrI	2296924	Y39G10AR.11		chrI	705557	Y18H1A.3
chrI	1058204	Y34D9A.10		chrI	2296927	Y39G10AR.11		chrI	705573	Y18H1A.3
chrI	1058209	Y34D9A.10		chrI	2296942	Y39G10AR.11		chrI	705616	Y18H1A.3
chrI	1058219	Y34D9A.10		chrI	2296960	Y39G10AR.11		chrI	705635	Y18H1A.3
chrI	1058220	Y34D9A.10		chrI	2296962	Y39G10AR.11		chrI	705649	Y18H1A.3
chrI	1058298	Y34D9A.10		chrI	2296973	Y39G10AR.11		chrI	705650	Y18H1A.3
chrI	1058317	Y34D9A.10		chrI	2296988	Y39G10AR.11		chrI	705653	Y18H1A.3
chrI	1058322	Y34D9A.10		chrI	2297001	Y39G10AR.11		chrI	705679	Y18H1A.3
chrI	1058330	Y34D9A.10		chrI	2297002	Y39G10AR.11		chrI	707844	Y18H1A.3
chrI	1058345	Y34D9A.10		chrI	2299112	Y39G10AR.12		chrI	708134	Y18H1A.3
chrI	1058558	Y34D9A.10		chrI	2299134	Y39G10AR.12		chrI	708153	Y18H1A.3
chrI	1058588	Y34D9A.10		chrI	2299186	Y39G10AR.12		chrI	710734	Y18H1A.3
chrI	1058589	Y34D9A.10		chrI	2299225	Y39G10AR.12		chrI	710735	Y18H1A.3
chrI	1058613	Y34D9A.10		chrI	2314312	Y39G10AR.8		chrI	710740	Y18H1A.3
chrI	1058637	Y34D9A.10		chrI	2314317	Y39G10AR.8		chrI	710821	Y18H1A.3
chrI	1058638	Y34D9A.10		chrI	2314344	Y39G10AR.8		chrI	710865	Y18H1A.3
chrI	1058641	Y34D9A.10		chrI	2314346	Y39G10AR.8		chrI	710875	Y18H1A.3
chrI	1058644	Y34D9A.10		chrI	2314353	Y39G10AR.8		chrI	710876	Y18H1A.3
chrI	1058651	Y34D9A.10		chrI	2314387	Y39G10AR.8		chrI	714151	Y18H1A.3
chrI	1058666	Y34D9A.10		chrI	2314409	Y39G10AR.8		chrI	714167	Y18H1A.3
chrI	1058667	Y34D9A.10		chrI	2314418	Y39G10AR.8		chrI	714181	Y18H1A.3
chrI	1058674	Y34D9A.10		chrI	2314444	Y39G10AR.8		chrI	714225	Y18H1A.3
chrI	1058683	Y34D9A.10		chrI	2314473	Y39G10AR.8		chrI	714226	Y18H1A.3
chrI	1058691	Y34D9A.10		chrI	2314683	Y39G10AR.8		chrI	714237	Y18H1A.3
chrI	1061401	Y34D9A.10		chrI	2314711	Y39G10AR.8		chrI	714254	Y18H1A.3
chrI	1076666			chrI	2314734	Y39G10AR.8		chrI	714255	Y18H1A.3
chrI	1082163			chrI	2314735	Y39G10AR.8		chrI	714260	Y18H1A.3
chrI	1086176	R06A10.1		chrI	2314736	Y39G10AR.8		chrI	714304	Y18H1A.3
chrI	1101300			chrI	2314740	Y39G10AR.8		chrI	714305	Y18H1A.3
chrI	1101325			chrI	2314782	Y39G10AR.8		chrI	714347	Y18H1A.3
chrI	1101326			chrI	2314791	Y39G10AR.8		chrI	714348	Y18H1A.3
chrI	1117846			chrI	2314792	Y39G10AR.8		chrI	714375	Y18H1A.3
chrI	1118308			chrI	2314797	Y39G10AR.8		chrI	714386	Y18H1A.3
chrI	1118617			chrI	2314807	Y39G10AR.8		chrI	718678	Y18H1A.7
chrI	1119041			chrI	2314826	Y39G10AR.8		chrI	719176	Y18H1A.7
chrI	1119079			chrI	2314850	Y39G10AR.8		chrI	721046	Y18H1A.6
chrI	1119096			chrI	2314851	Y39G10AR.8		chrI	721984	Y18H1A.6
chrI	1119163			chrI	2314856	Y39G10AR.8		chrI	721988	Y18H1A.6
chrI	1119221			chrI	2375635			chrI	721989	Y18H1A.6
chrI	1119504			chrI	2375640			chrI	721996	Y18H1A.6
chrI	1119845			chrI	2375641			chrI	727363	Y18H1A.6
chrI	1119903			chrI	2375648			chrI	727366	Y18H1A.6
chrI	1119970			chrI	2375653			chrI	727392	Y18H1A.6
chrI	1119987			chrI	2375654			chrI	727394	Y18H1A.6
chrI	1120025			chrI	2375678			chrI	727401	Y18H1A.6
chrI	1120449			chrI	2375688			chrI	727402	Y18H1A.6
chrI	1120758			chrI	2375690			chrI	727403	Y18H1A.6
chrI	1121220			chrI	2375691			chrI	727404	Y18H1A.6
chrI	1123819			chrI	2375710			chrI	727405	Y18H1A.6
chrI	1123908			chrI	2375713			chrI	727407	Y18H1A.6
chrI	1132962			chrI	2375743			chrI	727411	Y18H1A.6
chrI	1138548	Y48G8AL.9		chrI	2375744			chrI	727415	Y18H1A.6
chrI	1138549	Y48G8AL.9		chrI	2375748			chrI	727439	Y18H1A.6
chrI	1138551	Y48G8AL.9		chrI	2375752			chrI	727474	Y18H1A.6
chrI	1138553	Y48G8AL.9		chrI	2375753			chrI	727475	Y18H1A.6
chrI	1138558	Y48G8AL.9		chrI	2375806			chrI	727510	Y18H1A.6
chrI	1138567	Y48G8AL.9		chrI	2375807			chrI	727513	Y18H1A.6
chrI	1138600	Y48G8AL.9		chrI	2375836			chrI	727514	Y18H1A.6
chrI	1138606	Y48G8AL.9		chrI	2375839			chrI	727515	Y18H1A.6
chrI	1138616	Y48G8AL.9		chrI	2375840			chrI	727530	Y18H1A.6
chrI	1138634	Y48G8AL.9		chrI	2375841			chrI	727533	Y18H1A.6
chrI	1138909	Y48G8AL.9		chrI	2375851			chrI	727558	Y18H1A.6
chrI	1138910	Y48G8AL.9		chrI	2375857			chrI	727775	Y18H1A.6
chrI	1138911	Y48G8AL.9		chrI	2375878			chrI	727788	Y18H1A.6
chrI	1138912	Y48G8AL.9		chrI	2376030			chrI	728635	Y18H1A.6
chrI	1138980	Y48G8AL.9		chrI	2376111			chrI	728646	Y18H1A.6
chrI	1138998	Y48G8AL.9		chrI	2376120			chrI	728658	Y18H1A.6
chrI	1138999	Y48G8AL.9		chrI	2376121			chrI	755447	Y18H1A.9
chrI	1139005	Y48G8AL.9		chrI	2376122			chrI	816852	ZC123.3
chrI	1139006	Y48G8AL.9		chrI	2376123			chrI	827764	ZC123.3
chrI	1139008	Y48G8AL.9		chrI	2376124			chrI	828034	ZC123.3
chrI	1139009	Y48G8AL.9		chrI	2376136			chrI	828038	ZC123.3
chrI	1139014	Y48G8AL.9		chrI	2376174			chrI	828212	ZC123.3
chrI	1139095	Y48G8AL.9		chrI	2376176			chrI	828299	ZC123.3
chrI	1139127	Y48G8AL.9		chrI	2376186			chrI	831204	ZC123.3
chrI	1139274	Y48G8AL.9		chrI	2376189			chrI	831285	ZC123.3
chrI	1139368	Y48G8AL.9		chrI	2376207			chrI	831477	ZC123.3
chrI	1139668	Y48G8AL.9		chrI	2378183	Y39G10AR.17		chrI	831501	ZC123.3
chrI	1139686	Y48G8AL.9		chrI	2385281	Y39G10AR.18		chrI	831645	ZC123.3
chrI	1139869	Y48G8AL.9		chrI	2385284	Y39G10AR.18		chrI	832685	ZC123.3
chrI	1139871	Y48G8AL.9		chrI	2385351	Y39G10AR.18		chrI	832994	ZC123.3
chrI	1139875	Y48G8AL.9		chrI	2385353	Y39G10AR.18		chrI	833124	ZC123.3
chrI	1139899	Y48G8AL.9		chrI	2385506	Y39G10AR.18		chrI	836512
chrI	1139900	Y48G8AL.9		chrI	2385612	Y39G10AR.18		chrI	836527
chrI	1139911	Y48G8AL.9		chrI	2385721	Y39G10AR.18		chrI	836535
chrI	1139922	Y48G8AL.9		chrI	2385813	Y39G10AR.18		chrI	836536
chrI	1139932	Y48G8AL.9		chrI	2387622	Y39G10AR.18		chrI	836549
chrI	1139945	Y48G8AL.9		chrI	2390073	Y39G10AR.18		chrI	837066
chrI	1139949	Y48G8AL.9		chrI	2390080	Y39G10AR.18		chrI	837149
chrI	1139965	Y48G8AL.9		chrI	2390656	Y39G10AR.18		chrI	837239
chrI	1139972	Y48G8AL.9		chrI	2393959	Y39G10AR.18		chrI	837377
chrI	1140001	Y48G8AL.9		chrI	2394058	Y39G10AR.18		chrI	837379
chrI	1140002	Y48G8AL.9		chrI	2394620	Y39G10AR.18		chrI	837383
chrI	1140014	Y48G8AL.9		chrI	2394659	Y39G10AR.18		chrI	837390
chrI	1140015	Y48G8AL.9		chrI	2394663	Y39G10AR.18		chrI	837392
chrI	1140064	Y48G8AL.9		chrI	2394664	Y39G10AR.18		chrI	837395
chrI	1140110	Y48G8AL.9		chrI	2394673	Y39G10AR.18		chrI	837396
chrI	1142657	Y48G8AL.10		chrI	2394674	Y39G10AR.18		chrI	837671
chrI	1143608	Y48G8AL.10		chrI	2394679	Y39G10AR.18		chrI	837676
chrI	1143642	Y48G8AL.10		chrI	2394709	Y39G10AR.18		chrI	837682
chrI	1143645	Y48G8AL.10		chrI	2394711	Y39G10AR.18		chrI	837862
chrI	1143784	Y48G8AL.10		chrI	2394714	Y39G10AR.18		chrI	837883
chrI	1143797	Y48G8AL.10		chrI	2394870	Y39G10AR.18		chrI	837884
chrI	1143807	Y48G8AL.10		chrI	2394887	Y39G10AR.18		chrI	838654	ZC123.1
chrI	1143813	Y48G8AL.10		chrI	2394894	Y39G10AR.18		chrI	838667	ZC123.1
chrI	1144564	Y48G8AL.10		chrI	2394900	Y39G10AR.18		chrI	838679	ZC123.1
chrI	1144570	Y48G8AL.10		chrI	2394907	Y39G10AR.18		chrI	841299	ZC123.1
chrI	1144580	Y48G8AL.10		chrI	2394917	Y39G10AR.18		chrI	841347	ZC123.1
chrI	1144593	Y48G8AL.10		chrI	2394921	Y39G10AR.18		chrI	841352	ZC123.1
chrI	1144612	Y48G8AL.10		chrI	2394924	Y39G10AR.18		chrI	841496	ZC123.1
chrI	1144719	Y48G8AL.10		chrI	2394928	Y39G10AR.18		chrI	844566	ZC123.4
chrI	1144758	Y48G8AL.10		chrI	2394951	Y39G10AR.18		chrI	844567	ZC123.4
chrI	1144790	Y48G8AL.10		chrI	2394963	Y39G10AR.18		chrI	844594	ZC123.4
chrI	1144791	Y48G8AL.10		chrI	2403551	Y39G10AR.2		chrI	845378	ZC123.4
chrI	1144794	Y48G8AL.10		chrI	2403559	Y39G10AR.2		chrI	845384	ZC123.4
chrI	1144795	Y48G8AL.10		chrI	2403574	Y39G10AR.2		chrI	845387	ZC123.4
chrI	1144803	Y48G8AL.10		chrI	2403654	Y39G10AR.2		chrI	845402	ZC123.4
chrI	1144818	Y48G8AL.10		chrI	2403675	Y39G10AR.2		chrI	845514	ZC123.4
chrI	1144821	Y48G8AL.10		chrI	2403679	Y39G10AR.2		chrI	859499	Y95B8A.7
chrI	1145232	Y48G8AL.10		chrI	2403688	Y39G10AR.2		chrI	859511	Y95B8A.7
chrI	1145233	Y48G8AL.10		chrI	2403697	Y39G10AR.2		chrI	859512	Y95B8A.7
chrI	1145266	Y48G8AL.10		chrI	2403713	Y39G10AR.2		chrI	859513	Y95B8A.7
chrI	1145324	Y48G8AL.10		chrI	2403766	Y39G10AR.2		chrI	859520	Y95B8A.7
chrI	1145332	Y48G8AL.10		chrI	2403862	Y39G10AR.2		chrI	859527	Y95B8A.7
chrI	1145349	Y48G8AL.10		chrI	2403863	Y39G10AR.2		chrI	859528	Y95B8A.7
chrI	1145360	Y48G8AL.10		chrI	2403873	Y39G10AR.2		chrI	859541	Y95B8A.7
chrI	1145379	Y48G8AL.10		chrI	2403929	Y39G10AR.2		chrI	859550	Y95B8A.7
chrI	1145464	Y48G8AL.10		chrI	2403937	Y39G10AR.2		chrI	859581	Y95B8A.7
chrI	1145465	Y48G8AL.10		chrI	2403938	Y39G10AR.2		chrI	859582	Y95B8A.7
chrI	1145468	Y48G8AL.10		chrI	2404437	Y39G10AR.2		chrI	859583	Y95B8A.7
chrI	1145478	Y48G8AL.10		chrI	2404470	Y39G10AR.2		chrI	859584	Y95B8A.7
chrI	1145479	Y48G8AL.10		chrI	2404475	Y39G10AR.2		chrI	859594	Y95B8A.7
chrI	1145483	Y48G8AL.10		chrI	2404489	Y39G10AR.2		chrI	859658	Y95B8A.7
chrI	1145491	Y48G8AL.10		chrI	2404490	Y39G10AR.2		chrI	859715	Y95B8A.7
chrI	1145492	Y48G8AL.10		chrI	2408642	Y39G10AR.2		chrI	859724	Y95B8A.7
chrI	1145495	Y48G8AL.10		chrI	2408650	Y39G10AR.2		chrI	859726	Y95B8A.7
chrI	1145496	Y48G8AL.10		chrI	2408655	Y39G10AR.2		chrI	859749	Y95B8A.7
chrI	1148133	Y48G8AL.10		chrI	2408658	Y39G10AR.2		chrI	859750	Y95B8A.7
chrI	1148151	Y48G8AL.10		chrI	2408732	Y39G10AR.2		chrI	859758	Y95B8A.7
chrI	1148164	Y48G8AL.10		chrI	2408783	Y39G10AR.2		chrI	859770	Y95B8A.7
chrI	1148226	Y48G8AL.10		chrI	2413836			chrI	860509	Y95B8A.7
chrI	1148239	Y48G8AL.10		chrI	2415323	F23C8.13		chrI	860549	Y95B8A.7
chrI	1148248	Y48G8AL.10		chrI	2415326	F23C8.13		chrI	860560	Y95B8A.7
chrI	1148249	Y48G8AL.10		chrI	2415328	F23C8.13		chrI	860564	Y95B8A.7
chrI	1148260	Y48G8AL.10		chrI	2415330	F23C8.13		chrI	860572	Y95B8A.7
chrI	1148308	Y48G8AL.10		chrI	2415354	F23C8.13		chrI	860597	Y95B8A.7
chrI	1148565	Y48G8AL.10		chrI	2415361	F23C8.13		chrI	860603	Y95B8A.7
chrI	1148586	Y48G8AL.10		chrI	2415368	F23C8.13		chrI	860608	Y95B8A.7
chrI	1148587	Y48G8AL.10		chrI	2415384	F23C8.13		chrI	861557	Y95B8A.7
chrI	1148589	Y48G8AL.10		chrI	2415385	F23C8.13		chrI	863113	Y95B8A.7
chrI	1148598	Y48G8AL.10		chrI	2415503	F23C8.13		chrI	863116	Y95B8A.7
chrI	1148617	Y48G8AL.10		chrI	2415519	F23C8.13		chrI	863123	Y95B8A.7
chrI	1149057	Y48G8AL.10		chrI	2415524	F23C8.13		chrI	864577	Y95B8A.7
chrI	1149160	Y48G8AL.10		chrI	2415532	F23C8.13		chrI	864635	Y95B8A.7
chrI	1149188	Y48G8AL.10		chrI	2415533	F23C8.13		chrI	865279	Y95B8A.7
chrI	1149472	Y48G8AL.10		chrI	2415545	F23C8.13		chrI	867716	Y95B8A.7
chrI	1149488	Y48G8AL.10		chrI	2415555	F23C8.13		chrI	867725	Y95B8A.7
chrI	1149584	Y48G8AL.10		chrI	2415569	F23C8.13		chrI	867743	Y95B8A.7
chrI	1149592	Y48G8AL.10		chrI	2416919	F23C8.13		chrI	867744	Y95B8A.7
chrI	1149629	Y48G8AL.10		chrI	2438250			chrI	867745	Y95B8A.7
chrI	1149637	Y48G8AL.10		chrI	2438251			chrI	867746	Y95B8A.7
chrI	1149638	Y48G8AL.10		chrI	2438263			chrI	867754	Y95B8A.7
chrI	1149648	Y48G8AL.10		chrI	2438295			chrI	867755	Y95B8A.7
chrI	1149774	Y48G8AL.10		chrI	2461382	T16H5.1		chrI	867756	Y95B8A.7
chrI	1149777	Y48G8AL.10		chrI	2461438	T16H5.1		chrI	867763	Y95B8A.7
chrI	1149792	Y48G8AL.10		chrI	2461445	T16H5.1		chrI	867764	Y95B8A.7
chrI	1149800	Y48G8AL.10		chrI	2461469	T16H5.1		chrI	867768	Y95B8A.7
chrI	1149801	Y48G8AL.10		chrI	2462387	T16H5.1		chrI	867769	Y95B8A.7
chrI	1149804	Y48G8AL.10		chrI	2462436	T16H5.1		chrI	867783	Y95B8A.7
chrI	1149805	Y48G8AL.10		chrI	2476948	Y74C10AR.3		chrI	867789	Y95B8A.7
chrI	1149828	Y48G8AL.10		chrI	2476958	Y74C10AR.3		chrI	867790	Y95B8A.7
chrI	1149837	Y48G8AL.10		chrI	2478005	Y74C10AR.3		chrI	867831	Y95B8A.7
chrI	1150604	Y48G8AL.10		chrI	2481217	Y74C10AR.3		chrI	867845	Y95B8A.7
chrI	1151352	Y48G8AL.10		chrI	2486101	Y74C10AR.1		chrI	867846	Y95B8A.7
chrI	1151359	Y48G8AL.10		chrI	2486102	Y74C10AR.1		chrI	867847	Y95B8A.7
chrI	1151361	Y48G8AL.10		chrI	2486203	Y74C10AR.1		chrI	867848	Y95B8A.7
chrI	1151370	Y48G8AL.10		chrI	2486744	Y74C10AR.1		chrI	867849	Y95B8A.7
chrI	1151375	Y48G8AL.10		chrI	2486745	Y74C10AR.1		chrI	867856	Y95B8A.7
chrI	1151376	Y48G8AL.10		chrI	2488808	Y74C10AR.1		chrI	867859	Y95B8A.7
chrI	1151385	Y48G8AL.10		chrI	2488812	Y74C10AR.1		chrI	867860	Y95B8A.7
chrI	1151386	Y48G8AL.10		chrI	2488888	Y74C10AR.1		chrI	867862	Y95B8A.7
chrI	1151393	Y48G8AL.10		chrI	2488898	Y74C10AR.1		chrI	867871	Y95B8A.7
chrI	1151394	Y48G8AL.10		chrI	2488911	Y74C10AR.1		chrI	867874	Y95B8A.7
chrI	1151408	Y48G8AL.10		chrI	2488921	Y74C10AR.1		chrI	867875	Y95B8A.7
chrI	1151442	Y48G8AL.10		chrI	2489049	Y74C10AR.1		chrI	867877	Y95B8A.7
chrI	1151444	Y48G8AL.10		chrI	2489055	Y74C10AR.1		chrI	867878	Y95B8A.7
chrI	1151452	Y48G8AL.10		chrI	2489072	Y74C10AR.1		chrI	867883	Y95B8A.7
chrI	1151454	Y48G8AL.10		chrI	2489100	Y74C10AR.1		chrI	867884	Y95B8A.7
chrI	1151455	Y48G8AL.10		chrI	2489101	Y74C10AR.1		chrI	867889	Y95B8A.7
chrI	1151457	Y48G8AL.10		chrI	2489124	Y74C10AR.1		chrI	867895	Y95B8A.7
chrI	1151459	Y48G8AL.10		chrI	2489125	Y74C10AR.1		chrI	867906	Y95B8A.7
chrI	1151460	Y48G8AL.10		chrI	2491179	Y23H5B.6		chrI	867907	Y95B8A.7
chrI	1151470	Y48G8AL.10		chrI	2491180	Y23H5B.6		chrI	867908	Y95B8A.7
chrI	1151478	Y48G8AL.10		chrI	2491247	Y23H5B.6		chrI	868500	Y95B8A.7
chrI	1151505	Y48G8AL.10		chrI	2491507	Y23H5B.6		chrI	868501	Y95B8A.7
chrI	1151506	Y48G8AL.10		chrI	2491535	Y23H5B.6		chrI	870099	Y95B8A.7
chrI	1151514	Y48G8AL.10		chrI	2491621	Y23H5B.6		chrI	870112	Y95B8A.7
chrI	1151515	Y48G8AL.10		chrI	2491648	Y23H5B.6		chrI	870119	Y95B8A.7
chrI	1151518	Y48G8AL.10		chrI	2491688	Y23H5B.6		chrI	873531	Y95B8A.10
chrI	1151533	Y48G8AL.10		chrI	2494185	Y23H5B.6		chrI	875534	Y95B8A.10
chrI	1151605	Y48G8AL.10		chrI	2584502	K07A3.1		chrI	875610	Y95B8A.10
chrI	1151606	Y48G8AL.10		chrI	2585647	K07A3.1		chrI	875825	Y95B8A.10
chrI	1151704	Y48G8AL.10		chrI	2586938			chrI	876170	Y95B8A.10
chrI	1151726	Y48G8AL.10		chrI	2586949			chrI	877802	Y95B8A.10
chrI	1151731	Y48G8AL.10		chrI	2586969			chrI	901853	Y95B8A.5
chrI	1151738	Y48G8AL.10		chrI	2586970			chrI	901854	Y95B8A.5
chrI	1151746	Y48G8AL.10		chrI	2587130			chrI	901855	Y95B8A.5
chrI	1151753	Y48G8AL.10		chrI	2587144			chrI	901865	Y95B8A.5
chrI	1151758	Y48G8AL.10		chrI	2691825			chrI	901872	Y95B8A.5
chrI	1151759	Y48G8AL.10		chrI	2691826			chrI	901889	Y95B8A.5
chrI	1151762	Y48G8AL.10		chrI	2691827			chrI	901899	Y95B8A.5
chrI	1151772	Y48G8AL.10		chrI	2715403	Y71F9B.5		chrI	901900	Y95B8A.5
chrI	1151773	Y48G8AL.10		chrI	2715404	Y71F9B.5		chrI	901905	Y95B8A.5
chrI	1151781	Y48G8AL.10		chrI	2715411	Y71F9B.5		chrI	901910	Y95B8A.5
chrI	1151782	Y48G8AL.10		chrI	2715416	Y71F9B.5		chrI	902854	Y95B8A.5
chrI	1151791	Y48G8AL.10		chrI	2715433	Y71F9B.5		chrI	902861	Y95B8A.5
chrI	1151792	Y48G8AL.10		chrI	2715867	Y71F9B.5		chrI	902864	Y95B8A.5
chrI	1151793	Y48G8AL.10		chrI	2716423	Y71F9B.5		chrI	902873	Y95B8A.5
chrI	1151794	Y48G8AL.10		chrI	2716424	Y71F9B.5		chrI	902876	Y95B8A.5
chrI	1151807	Y48G8AL.10		chrI	2716438	Y71F9B.5		chrI	902881	Y95B8A.5
chrI	1151817	Y48G8AL.10		chrI	2716441	Y71F9B.5		chrI	902885	Y95B8A.5
chrI	1151818	Y48G8AL.10		chrI	2716453	Y71F9B.5		chrI	902886	Y95B8A.5
chrI	1151828	Y48G8AL.10		chrI	2716470	Y71F9B.5		chrI	902919	Y95B8A.5
chrI	1151832	Y48G8AL.10		chrI	2716488	Y71F9B.5		chrI	906957
chrI	1151833	Y48G8AL.10		chrI	2716489	Y71F9B.5		chrI	927294
chrI	1151835	Y48G8AL.10		chrI	2716511	Y71F9B.5		chrI	927437
chrI	1151843	Y48G8AL.10		chrI	2716519	Y71F9B.5		chrI	937625
chrI	1151845	Y48G8AL.10		chrI	2716532	Y71F9B.5		chrI	937698
chrI	1151878	Y48G8AL.10		chrI	2716543	Y71F9B.5		chrI	937711
chrI	1151881	Y48G8AL.10		chrI	2716546	Y71F9B.5		chrI	937725
chrI	1151890	Y48G8AL.10		chrI	2716573	Y71F9B.5		chrI	937736
chrI	1151893	Y48G8AL.10		chrI	2716574	Y71F9B.5		chrI	937737
chrI	1151894	Y48G8AL.10		chrI	2716586	Y71F9B.5		chrI	937759
chrI	1151901	Y48G8AL.10		chrI	2716595	Y71F9B.5		chrI	937883
chrI	1151902	Y48G8AL.10		chrI	2716609	Y71F9B.5		chrI	937884
chrI	1151911	Y48G8AL.10		chrI	2716645	Y71F9B.5		chrI	937889
chrI	1151912	Y48G8AL.10		chrI	2716652	Y71F9B.5		chrI	946786	Y95B8A.1
chrI	1151917	Y48G8AL.10		chrI	2716653	Y71F9B.5		chrI	946816	Y95B8A.1
chrI	1151926	Y48G8AL.10		chrI	2716998	Y71F9B.5		chrI	947017	Y95B8A.1
chrI	1151928	Y48G8AL.10		chrI	2717009	Y71F9B.5		chrI	947028	Y95B8A.1
chrI	1151935	Y48G8AL.10		chrI	2717128	Y71F9B.5		chrI	949986	Y34D9B.1
chrI	1151995	Y48G8AL.10		chrI	2721900			chrI	949987	Y34D9B.1
chrI	1151999	Y48G8AL.10		chrI	2721903			chrI	949993	Y34D9B.1
chrI	1158714	Y48G8AL.7		chrI	2721904			chrI	950002	Y34D9B.1
chrI	1158718	Y48G8AL.7		chrI	2721905			chrI	950003	Y34D9B.1
chrI	1158719	Y48G8AL.7		chrI	2721937			chrI	950012	Y34D9B.1
chrI	1158728	Y48G8AL.7		chrI	2721942			chrI	950013	Y34D9B.1
chrI	1158729	Y48G8AL.7		chrI	2721953			chrI	950022	Y34D9B.1
chrI	1158734	Y48G8AL.7		chrI	2721964			chrI	950044	Y34D9B.1
chrI	1158764	Y48G8AL.7		chrI	2721965			chrI	950062	Y34D9B.1
chrI	1158769	Y48G8AL.7		chrI	2721968			chrI	950082	Y34D9B.1
chrI	1158945	Y48G8AL.7		chrI	2721973			chrI	950097	Y34D9B.1
chrI	1158958	Y48G8AL.7		chrI	2721974			chrI	950105	Y34D9B.1
chrI	1158960	Y48G8AL.7		chrI	2721975			chrI	950255	Y34D9B.1
chrI	1158966	Y48G8AL.7		chrI	2721977			chrI	950328	Y34D9B.1
chrI	1158967	Y48G8AL.7		chrI	2721991			chrI	950341	Y34D9B.1
chrI	1158975	Y48G8AL.7		chrI	2722306			chrI	950352	Y34D9B.1
chrI	1158979	Y48G8AL.7		chrI	2722315			chrI	951278	Y34D9B.1
chrI	1158980	Y48G8AL.7		chrI	2722316			chrI	952752	Y34D9B.1
chrI	1158982	Y48G8AL.7		chrI	2722344			chrI	952997	Y34D9B.1
chrI	1158986	Y48G8AL.7		chrI	2722345			chrI	952998	Y34D9B.1
chrI	1159681	Y48G8AL.7		chrI	2722346			chrI	955150	Y34D9B.1
chrI	1159682	Y48G8AL.7		chrI	2722348			chrI	955171	Y34D9B.1
chrI	1159726	Y48G8AL.7		chrI	2722349			chrI	974844
chrI	1159783	Y48G8AL.7		chrI	2722354			chrI	975975
chrI	1159805	Y48G8AL.7		chrI	2722355			chrI	976011
chrI	1160998	Y48G8AL.7		chrI	2722356			chrI	976017
chrI	1161010	Y48G8AL.7		chrI	2722359			chrI	976023
chrI	1161013	Y48G8AL.7		chrI	2722364			chrI	1000736
chrI	1161014	Y48G8AL.7		chrI	2722369			chrI	1000743
chrI	1161026	Y48G8AL.7		chrI	2722377			chrI	1000750
chrI	1161112	Y48G8AL.7		chrI	2722378			chrI	1000755
chrI	1161113	Y48G8AL.7		chrI	2722388			chrI	1000758
chrI	1161114	Y48G8AL.7		chrI	2722398			chrI	1016083
chrI	1161116	Y48G8AL.7		chrI	2722399			chrI	1017804
chrI	1161126	Y48G8AL.7		chrI	2722408			chrI	1017851
chrI	1161127	Y48G8AL.7		chrI	2722422			chrI	1017852
chrI	1161132	Y48G8AL.7		chrI	2722431			chrI	1020217
chrI	1161135	Y48G8AL.7		chrI	2722432			chrI	1020227
chrI	1161140	Y48G8AL.7		chrI	2722503			chrI	1020231
chrI	1161143	Y48G8AL.7		chrI	2722504			chrI	1020232
chrI	1161150	Y48G8AL.7		chrI	2722511			chrI	1020253
chrI	1161163	Y48G8AL.7		chrI	2728047			chrI	1020254
chrI	1161165	Y48G8AL.7		chrI	2728121			chrI	1020257
chrI	1161166	Y48G8AL.7		chrI	2729179			chrI	1020305
chrI	1161167	Y48G8AL.7		chrI	2729188			chrI	1020306
chrI	1161179	Y48G8AL.7		chrI	2729197			chrI	1020313
chrI	1161190	Y48G8AL.7		chrI	2729259			chrI	1020315
chrI	1161198	Y48G8AL.7		chrI	2729264			chrI	1020316
chrI	1161200	Y48G8AL.7		chrI	2729286			chrI	1020322
chrI	1161215	Y48G8AL.7		chrI	2729344			chrI	1020329
chrI	1161218	Y48G8AL.7		chrI	2729376			chrI	1020343
chrI	1161225	Y48G8AL.7		chrI	2729417			chrI	1020346
chrI	1161226	Y48G8AL.7		chrI	2729438			chrI	1020369
chrI	1161227	Y48G8AL.7		chrI	2729460			chrI	1020374
chrI	1161244	Y48G8AL.7		chrI	2729471			chrI	1020375
chrI	1161245	Y48G8AL.7		chrI	2729546			chrI	1020407
chrI	1161281	Y48G8AL.7		chrI	2729547			chrI	1020416
chrI	1161294	Y48G8AL.7		chrI	2729549			chrI	1020417
chrI	1161303	Y48G8AL.7		chrI	2729554			chrI	1020418
chrI	1161340	Y48G8AL.7		chrI	2733530	Y71F9B.2		chrI	1020659
chrI	1161386	Y48G8AL.7		chrI	2733539	Y71F9B.2		chrI	1020660
chrI	1161387	Y48G8AL.7		chrI	2733555	Y71F9B.2		chrI	1020676
chrI	1161389	Y48G8AL.7		chrI	2733556	Y71F9B.2		chrI	1020677
chrI	1161399	Y48G8AL.7		chrI	2733557	Y71F9B.2		chrI	1020682
chrI	1161401	Y48G8AL.7		chrI	2733578	Y71F9B.2		chrI	1020683
chrI	1161402	Y48G8AL.7		chrI	2733579	Y71F9B.2		chrI	1020684
chrI	1161412	Y48G8AL.7		chrI	2733583	Y71F9B.2		chrI	1020686
chrI	1161484	Y48G8AL.7		chrI	2733600	Y71F9B.2		chrI	1020690
chrI	1161509	Y48G8AL.7		chrI	2733621	Y71F9B.2		chrI	1020697
chrI	1161510	Y48G8AL.7		chrI	2733622	Y71F9B.2		chrI	1020719
chrI	1161512	Y48G8AL.7		chrI	2733688	Y71F9B.2		chrI	1020730
chrI	1161513	Y48G8AL.7		chrI	2733695	Y71F9B.2		chrI	1020736
chrI	1161514	Y48G8AL.7		chrI	2733714	Y71F9B.2		chrI	1020737
chrI	1161525	Y48G8AL.7		chrI	2733715	Y71F9B.2		chrI	1020742
chrI	1161526	Y48G8AL.7		chrI	2733719	Y71F9B.2		chrI	1020762
chrI	1161527	Y48G8AL.7		chrI	2733724	Y71F9B.2		chrI	1020763
chrI	1161534	Y48G8AL.7		chrI	2733904	Y71F9B.2		chrI	1020764
chrI	1161537	Y48G8AL.7		chrI	2733927	Y71F9B.2		chrI	1020777
chrI	1161538	Y48G8AL.7		chrI	2733961	Y71F9B.2		chrI	1020784
chrI	1161545	Y48G8AL.7		chrI	2734005	Y71F9B.2		chrI	1020789
chrI	1161548	Y48G8AL.7		chrI	2734045	Y71F9B.2		chrI	1020806
chrI	1161562	Y48G8AL.7		chrI	2734052	Y71F9B.2		chrI	1021404
chrI	1161570	Y48G8AL.7		chrI	2734062	Y71F9B.2		chrI	1021409
chrI	1161680	Y48G8AL.7		chrI	2734075	Y71F9B.2		chrI	1021425
chrI	1161718	Y48G8AL.7		chrI	2734076	Y71F9B.2		chrI	1021426
chrI	1161721	Y48G8AL.7		chrI	2734088	Y71F9B.2		chrI	1021427
chrI	1161722	Y48G8AL.7		chrI	2734105	Y71F9B.2		chrI	1021447
chrI	1162875	Y48G8AL.7		chrI	2734112	Y71F9B.2		chrI	1021459
chrI	1163222	Y48G8AL.11		chrI	2734118	Y71F9B.2		chrI	1021461
chrI	1163337	Y48G8AL.11		chrI	2734323	Y71F9B.2		chrI	1021466
chrI	1163358	Y48G8AL.11		chrI	2734333	Y71F9B.2		chrI	1021469
chrI	1163359	Y48G8AL.11		chrI	2734334	Y71F9B.2		chrI	1021472
chrI	1163396	Y48G8AL.11		chrI	2734339	Y71F9B.2		chrI	1021479
chrI	1163397	Y48G8AL.11		chrI	2734361	Y71F9B.2		chrI	1021486
chrI	1163402	Y48G8AL.11		chrI	2734380	Y71F9B.2		chrI	1021497
chrI	1163409	Y48G8AL.11		chrI	2734403	Y71F9B.2		chrI	1021498
chrI	1163504	Y48G8AL.11		chrI	2734413	Y71F9B.2		chrI	1021502
chrI	1164065	Y48G8AL.11		chrI	2734429	Y71F9B.2		chrI	1021503
chrI	1164094	Y48G8AL.11		chrI	2734436	Y71F9B.2		chrI	1021509
chrI	1165603	Y48G8AL.11		chrI	2734461	Y71F9B.2		chrI	1021510
chrI	1168352	Y48G8AL.11		chrI	2734468	Y71F9B.2		chrI	1021738
chrI	1168572	Y48G8AL.11		chrI	2734498	Y71F9B.2		chrI	1021741
chrI	1168618	Y48G8AL.11		chrI	2734499	Y71F9B.2		chrI	1021758
chrI	1174575	Y48G8AL.11		chrI	2734506	Y71F9B.2		chrI	1021763
chrI	1175009	Y48G8AL.11		chrI	2734716	Y71F9B.2		chrI	1021764
chrI	1175019	Y48G8AL.11		chrI	2734719	Y71F9B.2		chrI	1021765
chrI	1175024	Y48G8AL.11		chrI	2734758	Y71F9B.2		chrI	1021766
chrI	1175026	Y48G8AL.11		chrI	2734828	Y71F9B.2		chrI	1021767
chrI	1175034	Y48G8AL.11		chrI	2734829	Y71F9B.2		chrI	1022394
chrI	1177355	Y48G8AL.6		chrI	2734852	Y71F9B.2		chrI	1022702
chrI	1178554	Y48G8AL.6		chrI	2734865	Y71F9B.2		chrI	1022703
chrI	1178563	Y48G8AL.6		chrI	2734882	Y71F9B.2		chrI	1022709
chrI	1178587	Y48G8AL.6		chrI	2734886	Y71F9B.2		chrI	1022710
chrI	1181927	Y48G8AL.6		chrI	2734887	Y71F9B.2		chrI	1022726
chrI	1181930	Y48G8AL.6		chrI	2734895	Y71F9B.2		chrI	1022733
chrI	1181931	Y48G8AL.6		chrI	2734896	Y71F9B.2		chrI	1022740
chrI	1181968	Y48G8AL.6		chrI	2734908	Y71F9B.2		chrI	1022743
chrI	1181969	Y48G8AL.6		chrI	2734909	Y71F9B.2		chrI	1022746
chrI	1182008	Y48G8AL.6		chrI	2734910	Y71F9B.2		chrI	1022751
chrI	1182019	Y48G8AL.6		chrI	2761664	Y71F9B.10		chrI	1022752
chrI	1182079	Y48G8AL.6		chrI	2773069	Y71F9B.10		chrI	1022753
chrI	1185636	Y48G8AL.6		chrI	2773072	Y71F9B.10		chrI	1022758
chrI	1188572	Y48G8AL.6		chrI	2773209	Y71F9B.10		chrI	1022773
chrI	1188578	Y48G8AL.6		chrI	2773778	Y71F9B.10		chrI	1022806
chrI	1188584	Y48G8AL.6		chrI	2774843	Y71F9B.10		chrI	1022807
chrI	1189947	Y48G8AL.6		chrI	2822942			chrI	1023955
chrI	1194695	Y48G8AL.5		chrI	2822977			chrI	1024320
chrI	1197781	Y48G8AL.5		chrI	2869456			chrI	1024341
chrI	1197804	Y48G8AL.5		chrI	2869520			chrI	1024342
chrI	1197805	Y48G8AL.5		chrI	2869583			chrI	1024376
chrI	1197820	Y48G8AL.5		chrI	2869589			chrI	1024377
chrI	1197826	Y48G8AL.5		chrI	2869632			chrI	1025045
chrI	1197885	Y48G8AL.5		chrI	2870269			chrI	1025127
chrI	1197897	Y48G8AL.5		chrI	2870298			chrI	1025129
chrI	1197900	Y48G8AL.5		chrI	2870323			chrI	1025137
chrI	1197906	Y48G8AL.5		chrI	2870324			chrI	1025242
chrI	1197908	Y48G8AL.5		chrI	2870341			chrI	1025299
chrI	1197909	Y48G8AL.5		chrI	2870345			chrI	1025400
chrI	1197918	Y48G8AL.5		chrI	2870348			chrI	1025430
chrI	1197934	Y48G8AL.5		chrI	2870351			chrI	1025442
chrI	1197942	Y48G8AL.5		chrI	2870401			chrI	1025443
chrI	1197945	Y48G8AL.5		chrI	2870406			chrI	1025447
chrI	1197949	Y48G8AL.5		chrI	2870460			chrI	1025452
chrI	1197968	Y48G8AL.5		chrI	2872824	Y71F9AL.12		chrI	1025457
chrI	1197988	Y48G8AL.5		chrI	2873029	Y71F9AL.12		chrI	1025471
chrI	1197995	Y48G8AL.5		chrI	2873067	Y71F9AL.12		chrI	1025472
chrI	1197996	Y48G8AL.5		chrI	2873068	Y71F9AL.12		chrI	1025473
chrI	1198004	Y48G8AL.5		chrI	2889863	Y71F9AL.16		chrI	1025496
chrI	1198005	Y48G8AL.5		chrI	2889864	Y71F9AL.16		chrI	1025498
chrI	1198008	Y48G8AL.5		chrI	2889865	Y71F9AL.16		chrI	1025503
chrI	1198061	Y48G8AL.5		chrI	2889993	Y71F9AL.16		chrI	1025504
chrI	1198064	Y48G8AL.5		chrI	2890104	Y71F9AL.16		chrI	1025507
chrI	1198074	Y48G8AL.5		chrI	2890129	Y71F9AL.16		chrI	1025516
chrI	1198075	Y48G8AL.5		chrI	2890130	Y71F9AL.16		chrI	1025520
chrI	1198085	Y48G8AL.5		chrI	2890131	Y71F9AL.16		chrI	1025526
chrI	1198095	Y48G8AL.5		chrI	2890132	Y71F9AL.16		chrI	1025530
chrI	1198096	Y48G8AL.5		chrI	2890161	Y71F9AL.16		chrI	1025531
chrI	1198098	Y48G8AL.5		chrI	2921102	Y71F9AL.18		chrI	1025540
chrI	1198107	Y48G8AL.5		chrI	2926001	Y71F9AL.1		chrI	1025619
chrI	1198108	Y48G8AL.5		chrI	2926006	Y71F9AL.1		chrI	1025627
chrI	1198110	Y48G8AL.5		chrI	2926007	Y71F9AL.1		chrI	1025636
chrI	1198111	Y48G8AL.5		chrI	2926024	Y71F9AL.1		chrI	1025642
chrI	1198156	Y48G8AL.5		chrI	2926116	Y71F9AL.1		chrI	1025643
chrI	1198157	Y48G8AL.5		chrI	2926118	Y71F9AL.1		chrI	1025647
chrI	1198182	Y48G8AL.5		chrI	2926178	Y71F9AL.1		chrI	1025683
chrI	1198207	Y48G8AL.5		chrI	2926199	Y71F9AL.1		chrI	1025687
chrI	1198210	Y48G8AL.5		chrI	2926206	Y71F9AL.1		chrI	1025696
chrI	1198236	Y48G8AL.5		chrI	2926233	Y71F9AL.1		chrI	1025718
chrI	1198243	Y48G8AL.5		chrI	2926241	Y71F9AL.1		chrI	1025816
chrI	1198246	Y48G8AL.5		chrI	2926246	Y71F9AL.1		chrI	1025829
chrI	1198248	Y48G8AL.5		chrI	2926255	Y71F9AL.1		chrI	1025833
chrI	1198252	Y48G8AL.5		chrI	2926273	Y71F9AL.1		chrI	1025842
chrI	1198263	Y48G8AL.5		chrI	2926274	Y71F9AL.1		chrI	1025864
chrI	1201491	Y48G8AL.5		chrI	2927174	Y71F9AL.1		chrI	1025875
chrI	1201520	Y48G8AL.5		chrI	2927175	Y71F9AL.1		chrI	1025880
chrI	1201567	Y48G8AL.5		chrI	2927265	Y71F9AL.1		chrI	1025882
chrI	1202100	Y48G8AL.5		chrI	2927308	Y71F9AL.1		chrI	1025885
chrI	1202111	Y48G8AL.5		chrI	2930530	Y71F9AM.5		chrI	1025893
chrI	1202132	Y48G8AL.5		chrI	2930542	Y71F9AM.5		chrI	1025931
chrI	1202133	Y48G8AL.5		chrI	2930543	Y71F9AM.5		chrI	1025942
chrI	1202134	Y48G8AL.5		chrI	2930559	Y71F9AM.5		chrI	1025949
chrI	1202136	Y48G8AL.5		chrI	2930566	Y71F9AM.5		chrI	1025957
chrI	1202137	Y48G8AL.5		chrI	2930567	Y71F9AM.5		chrI	1025969
chrI	1202219	Y48G8AL.5		chrI	2930568	Y71F9AM.5		chrI	1026275
chrI	1202223	Y48G8AL.5		chrI	2930572	Y71F9AM.5		chrI	1026321
chrI	1202758	Y48G8AL.5		chrI	2930579	Y71F9AM.5		chrI	1026469
chrI	1202803	Y48G8AL.5		chrI	2930645	Y71F9AM.5		chrI	1031165
chrI	1202804	Y48G8AL.5		chrI	2930646	Y71F9AM.5		chrI	1031168
chrI	1202839	Y48G8AL.5		chrI	2930651	Y71F9AM.5		chrI	1031169
chrI	1202858	Y48G8AL.5		chrI	2930673	Y71F9AM.5		chrI	1031171
chrI	1202886	Y48G8AL.5		chrI	2930695	Y71F9AM.5		chrI	1031172
chrI	1202901	Y48G8AL.5		chrI	2930712	Y71F9AM.5		chrI	1031182
chrI	1202940	Y48G8AL.5		chrI	2930736	Y71F9AM.5		chrI	1031194
chrI	1202943	Y48G8AL.5		chrI	2930809	Y71F9AM.5		chrI	1031196
chrI	1202953	Y48G8AL.5		chrI	2930810	Y71F9AM.5		chrI	1031199
chrI	1202954	Y48G8AL.5		chrI	2930832	Y71F9AM.5		chrI	1031202
chrI	1202958	Y48G8AL.5		chrI	2930841	Y71F9AM.5		chrI	1031205
chrI	1202967	Y48G8AL.5		chrI	2930858	Y71F9AM.5		chrI	1031206
chrI	1202970	Y48G8AL.5		chrI	2930871	Y71F9AM.5		chrI	1031207
chrI	1202971	Y48G8AL.5		chrI	2930887	Y71F9AM.5		chrI	1031208
chrI	1203003	Y48G8AL.5		chrI	2930888	Y71F9AM.5		chrI	1031209
chrI	1205267	Y48G8AL.5		chrI	2930893	Y71F9AM.5		chrI	1031210
chrI	1205277	Y48G8AL.5		chrI	2930899	Y71F9AM.5		chrI	1031211
chrI	1206576	Y48G8AL.5		chrI	2930956	Y71F9AM.5		chrI	1031220
chrI	1206614	Y48G8AL.5		chrI	2930988	Y71F9AM.5		chrI	1031223
chrI	1206616	Y48G8AL.5		chrI	2930991	Y71F9AM.5		chrI	1031246
chrI	1206637	Y48G8AL.5		chrI	2930997	Y71F9AM.5		chrI	1031262
chrI	1206640	Y48G8AL.5		chrI	2930998	Y71F9AM.5		chrI	1031264
chrI	1206649	Y48G8AL.5		chrI	2931021	Y71F9AM.5		chrI	1031265
chrI	1206650	Y48G8AL.5		chrI	2931045	Y71F9AM.5		chrI	1031271
chrI	1206653	Y48G8AL.5		chrI	2931057	Y71F9AM.5		chrI	1031292
chrI	1206668	Y48G8AL.5		chrI	2931082	Y71F9AM.5		chrI	1031293
chrI	1206672	Y48G8AL.5		chrI	2931087	Y71F9AM.5		chrI	1031294
chrI	1206688	Y48G8AL.5		chrI	2945072	Y71F9AM.4		chrI	1031300
chrI	1206696	Y48G8AL.5		chrI	2945096	Y71F9AM.4		chrI	1031301
chrI	1206699	Y48G8AL.5		chrI	2989052	Y71F9AR.3		chrI	1031312
chrI	1206703	Y48G8AL.5		chrI	2989057	Y71F9AR.3		chrI	1031320
chrI	1206704	Y48G8AL.5		chrI	2989891	Y71F9AR.3		chrI	1031322
chrI	1206722	Y48G8AL.5		chrI	2989905	Y71F9AR.3		chrI	1031323
chrI	1206742	Y48G8AL.5		chrI	2989924	Y71F9AR.3		chrI	1031324
chrI	1206749	Y48G8AL.5		chrI	2990318	Y71F9AR.3		chrI	1031330
chrI	1206750	Y48G8AL.5		chrI	2990319	Y71F9AR.3		chrI	1031331
chrI	1206758	Y48G8AL.5		chrI	2991783	Y71F9AR.3		chrI	1031332
chrI	1206778	Y48G8AL.5		chrI	2991835	Y71F9AR.3		chrI	1031337
chrI	1206800	Y48G8AL.5		chrI	2998662	Y54E10BL.4		chrI	1031366
chrI	1206801	Y48G8AL.5		chrI	2998674	Y54E10BL.4		chrI	1031371
chrI	1206805	Y48G8AL.5		chrI	2998675	Y54E10BL.4		chrI	1031374
chrI	1206815	Y48G8AL.5		chrI	3002022	Y54E10BL.5		chrI	1031375
chrI	1206818	Y48G8AL.5		chrI	3002054	Y54E10BL.5		chrI	1031391
chrI	1206827	Y48G8AL.5		chrI	3006304	Y54E10BL.6		chrI	1031404
chrI	1206828	Y48G8AL.5		chrI	3006308	Y54E10BL.6		chrI	1031864
chrI	1206832	Y48G8AL.5		chrI	3006312	Y54E10BL.6		chrI	1031865
chrI	1206839	Y48G8AL.5		chrI	3006316	Y54E10BL.6		chrI	1031868
chrI	1206843	Y48G8AL.5		chrI	3006332	Y54E10BL.6		chrI	1031891
chrI	1206849	Y48G8AL.5		chrI	3006407	Y54E10BL.6		chrI	1031898
chrI	1206852	Y48G8AL.5		chrI	3006694	Y54E10BL.6		chrI	1032053
chrI	1206860	Y48G8AL.5		chrI	3006698	Y54E10BL.6		chrI	1032069
chrI	1206861	Y48G8AL.5		chrI	3006699	Y54E10BL.6		chrI	1032434
chrI	1206862	Y48G8AL.5		chrI	3006701	Y54E10BL.6		chrI	1033049
chrI	1206864	Y48G8AL.5		chrI	3007109	Y54E10BL.6		chrI	1033395
chrI	1206865	Y48G8AL.5		chrI	3007126	Y54E10BL.6		chrI	1034881
chrI	1206911	Y48G8AL.5		chrI	3007174	Y54E10BL.6		chrI	1036790
chrI	1206925	Y48G8AL.5		chrI	3007199	Y54E10BL.6		chrI	1036810
chrI	1206926	Y48G8AL.5		chrI	3007260	Y54E10BL.6		chrI	1036833
chrI	1206927	Y48G8AL.5		chrI	3007312	Y54E10BL.6		chrI	1036853
chrI	1206936	Y48G8AL.5		chrI	3007355	Y54E10BL.6		chrI	1040031
chrI	1206957	Y48G8AL.5		chrI	3007444	Y54E10BL.6		chrI	1040037
chrI	1207025	Y48G8AL.5		chrI	3007459	Y54E10BL.6		chrI	1042806
chrI	1207033	Y48G8AL.5		chrI	3007490	Y54E10BL.6		chrI	1042809
chrI	1207041	Y48G8AL.5		chrI	3007505	Y54E10BL.6		chrI	1042819
chrI	1207042	Y48G8AL.5		chrI	3015929	Y54E10BR.4		chrI	1042825
chrI	1207044	Y48G8AL.5		chrI	3015930	Y54E10BR.4		chrI	1042844
chrI	1207053	Y48G8AL.5		chrI	3016125	Y54E10BR.4		chrI	1042855
chrI	1207072	Y48G8AL.5		chrI	3017473	Y54E10BR.4		chrI	1042857
chrI	1207076	Y48G8AL.5		chrI	3020522	Y54E10BR.4		chrI	1042858
chrI	1207079	Y48G8AL.5		chrI	3020572	Y54E10BR.4		chrI	1042859
chrI	1207087	Y48G8AL.5		chrI	3020926	Y54E10BR.4		chrI	1042867
chrI	1207112	Y48G8AL.5		chrI	3020927	Y54E10BR.4		chrI	1042869
chrI	1207113	Y48G8AL.5		chrI	3021070	Y54E10BR.4		chrI	1042870
chrI	1207115	Y48G8AL.5		chrI	3021095	Y54E10BR.4		chrI	1042957
chrI	1207123	Y48G8AL.5		chrI	3021133	Y54E10BR.4		chrI	1043569
chrI	1207125	Y48G8AL.5		chrI	3027129	Y54E10BR.3		chrI	1043842
chrI	1207138	Y48G8AL.5		chrI	3027130	Y54E10BR.3		chrI	1043888
chrI	1207159	Y48G8AL.5		chrI	3027142	Y54E10BR.3		chrI	1043931
chrI	1207161	Y48G8AL.5		chrI	3027283	Y54E10BR.3		chrI	1046464
chrI	1207199	Y48G8AL.5		chrI	3027284	Y54E10BR.3		chrI	1048874	Y34D9A.8
chrI	1207210	Y48G8AL.5		chrI	3027313	Y54E10BR.3		chrI	1048877	Y34D9A.8
chrI	1207216	Y48G8AL.5		chrI	3027314	Y54E10BR.3		chrI	1050640
chrI	1207239	Y48G8AL.5		chrI	3027326	Y54E10BR.3		chrI	1050690
chrI	1207240	Y48G8AL.5		chrI	3028059	Y54E10BR.3		chrI	1050701
chrI	1207255	Y48G8AL.5		chrI	3033929	Y54E10BR.2		chrI	1050703
chrI	1231640	Y48G8AL.1		chrI	3033936	Y54E10BR.2		chrI	1050777	Y34D9A.8
chrI	1233550	Y48G8AL.1		chrI	3033943	Y54E10BR.2		chrI	1051011	Y34D9A.8
chrI	1233551	Y48G8AL.1		chrI	3033967	Y54E10BR.2		chrI	1051297	Y34D9A.8
chrI	1235627	Y48G8AL.1		chrI	3033981	Y54E10BR.2		chrI	1051634	Y34D9A.8
chrI	1236931	Y48G8AL.1		chrI	3033987	Y54E10BR.2		chrI	1051635	Y34D9A.8
chrI	1236938	Y48G8AL.1		chrI	3033988	Y54E10BR.2		chrI	1053015	Y34D9A.8
chrI	1239637	Y48G8AL.1		chrI	3034056	Y54E10BR.2		chrI	1053016	Y34D9A.8
chrI	1241662	Y48G8AL.1		chrI	3034139	Y54E10BR.2		chrI	1053025	Y34D9A.8
chrI	1243500	Y48G8AL.1		chrI	3034168	Y54E10BR.2		chrI	1053071	Y34D9A.8
chrI	1243718	Y48G8AL.1		chrI	3034173	Y54E10BR.2		chrI	1053974	Y34D9A.10
chrI	1243730	Y48G8AL.1		chrI	3034182	Y54E10BR.2		chrI	1054329	Y34D9A.10
chrI	1244039	Y48G8AL.1		chrI	3034191	Y54E10BR.2		chrI	1054442	Y34D9A.10
chrI	1244198	Y48G8AL.1		chrI	3034208	Y54E10BR.2		chrI	1056151	Y34D9A.10
chrI	1244393	Y48G8AL.1		chrI	3034209	Y54E10BR.2		chrI	1056550	Y34D9A.10
chrI	1244404	Y48G8AL.1		chrI	3034225	Y54E10BR.2		chrI	1056560	Y34D9A.10
chrI	1244427	Y48G8AL.1		chrI	3034232	Y54E10BR.2		chrI	1056583	Y34D9A.10
chrI	1244953	Y48G8AL.1		chrI	3034240	Y54E10BR.2		chrI	1056614	Y34D9A.10
chrI	1244960	Y48G8AL.1		chrI	3034241	Y54E10BR.2		chrI	1056619	Y34D9A.10
chrI	1244972	Y48G8AL.1		chrI	3034243	Y54E10BR.2		chrI	1056625	Y34D9A.10
chrI	1244982	Y48G8AL.1		chrI	3034291	Y54E10BR.2		chrI	1056626	Y34D9A.10
chrI	1244993	Y48G8AL.1		chrI	3034297	Y54E10BR.2		chrI	1056632	Y34D9A.10
chrI	1245017	Y48G8AL.1		chrI	3034299	Y54E10BR.2		chrI	1056637	Y34D9A.10
chrI	1245134	Y48G8AL.1		chrI	3034305	Y54E10BR.2		chrI	1056638	Y34D9A.10
chrI	1245450	Y48G8AL.1		chrI	3034306	Y54E10BR.2		chrI	1056652	Y34D9A.10
chrI	1245461	Y48G8AL.1		chrI	3034318	Y54E10BR.2		chrI	1056653	Y34D9A.10
chrI	1245471	Y48G8AL.1		chrI	3034339	Y54E10BR.2		chrI	1056739	Y34D9A.10
chrI	1245472	Y48G8AL.1		chrI	3034343	Y54E10BR.2		chrI	1056772	Y34D9A.10
chrI	1245478	Y48G8AL.1		chrI	3034352	Y54E10BR.2		chrI	1056773	Y34D9A.10
chrI	1245575	Y48G8AL.1		chrI	3034356	Y54E10BR.2		chrI	1056790	Y34D9A.10
chrI	1245576	Y48G8AL.1		chrI	3034363	Y54E10BR.2		chrI	1056797	Y34D9A.10
chrI	1245585	Y48G8AL.1		chrI	3034369	Y54E10BR.2		chrI	1056799	Y34D9A.10
chrI	1245586	Y48G8AL.1		chrI	3034384	Y54E10BR.2		chrI	1056801	Y34D9A.10
chrI	1245587	Y48G8AL.1		chrI	3034385	Y54E10BR.2		chrI	1056802	Y34D9A.10
chrI	1245592	Y48G8AL.1		chrI	3034390	Y54E10BR.2		chrI	1056813	Y34D9A.10
chrI	1245601	Y48G8AL.1		chrI	3034468	Y54E10BR.2		chrI	1056840	Y34D9A.10
chrI	1245647	Y48G8AL.1		chrI	3034492	Y54E10BR.2		chrI	1056841	Y34D9A.10
chrI	1245662	Y48G8AL.1		chrI	3034494	Y54E10BR.2		chrI	1057821	Y34D9A.10
chrI	1245663	Y48G8AL.1		chrI	3034521	Y54E10BR.2		chrI	1058148	Y34D9A.10
chrI	1245664	Y48G8AL.1		chrI	3034528	Y54E10BR.2		chrI	1058162	Y34D9A.10
chrI	1245671	Y48G8AL.1		chrI	3034529	Y54E10BR.2		chrI	1058163	Y34D9A.10
chrI	1245672	Y48G8AL.1		chrI	3034548	Y54E10BR.2		chrI	1058165	Y34D9A.10
chrI	1245675	Y48G8AL.1		chrI	3034549	Y54E10BR.2		chrI	1058167	Y34D9A.10
chrI	1245680	Y48G8AL.1		chrI	3034550	Y54E10BR.2		chrI	1058173	Y34D9A.10
chrI	1245682	Y48G8AL.1		chrI	3034553	Y54E10BR.2		chrI	1058174	Y34D9A.10
chrI	1245686	Y48G8AL.1		chrI	3034558	Y54E10BR.2		chrI	1058189	Y34D9A.10
chrI	1245691	Y48G8AL.1		chrI	3034559	Y54E10BR.2		chrI	1058190	Y34D9A.10
chrI	1245693	Y48G8AL.1		chrI	3034570	Y54E10BR.2		chrI	1058191	Y34D9A.10
chrI	1245695	Y48G8AL.1		chrI	3034571	Y54E10BR.2		chrI	1058196	Y34D9A.10
chrI	1245701	Y48G8AL.1		chrI	3034607	Y54E10BR.2		chrI	1058203	Y34D9A.10
chrI	1245704	Y48G8AL.1		chrI	3036740	Y54E10BR.7		chrI	1058207	Y34D9A.10
chrI	1245706	Y48G8AL.1		chrI	3073141	M01B12.4		chrI	1058212	Y34D9A.10
chrI	1245710	Y48G8AL.1		chrI	3073151	M01B12.4		chrI	1058222	Y34D9A.10
chrI	1245714	Y48G8AL.1		chrI	3073204	M01B12.4		chrI	1058227	Y34D9A.10
chrI	1245715	Y48G8AL.1		chrI	3073228	M01B12.4		chrI	1058228	Y34D9A.10
chrI	1245716	Y48G8AL.1		chrI	3073231	M01B12.4		chrI	1058245	Y34D9A.10
chrI	1245727	Y48G8AL.1		chrI	3073249	M01B12.4		chrI	1058246	Y34D9A.10
chrI	1245731	Y48G8AL.1		chrI	3073872	M01B12.4		chrI	1058252	Y34D9A.10
chrI	1245740	Y48G8AL.1		chrI	3073873	M01B12.4		chrI	1058255	Y34D9A.10
chrI	1245752	Y48G8AL.1		chrI	3073890	M01B12.4		chrI	1058256	Y34D9A.10
chrI	1245763	Y48G8AL.1		chrI	3073925	M01B12.4		chrI	1058262	Y34D9A.10
chrI	1245778	Y48G8AL.1		chrI	3073930	M01B12.4		chrI	1058270	Y34D9A.10
chrI	1245787	Y48G8AL.1		chrI	3073975	M01B12.4		chrI	1058275	Y34D9A.10
chrI	1245861	Y48G8AL.1		chrI	3079864	M01B12.4		chrI	1058278	Y34D9A.10
chrI	1245870	Y48G8AL.1		chrI	3079876	M01B12.4		chrI	1058499	Y34D9A.10
chrI	1245883	Y48G8AL.1		chrI	3079877	M01B12.4		chrI	1058509	Y34D9A.10
chrI	1245886	Y48G8AL.1		chrI	3080131	M01B12.4		chrI	1058649	Y34D9A.10
chrI	1245938	Y48G8AL.1		chrI	3080183	M01B12.4		chrI	1058670	Y34D9A.10
chrI	1246128	Y48G8AL.1		chrI	3080184	M01B12.4		chrI	1059354	Y34D9A.10
chrI	1246129	Y48G8AL.1		chrI	3086374	M01B12.5		chrI	1059550	Y34D9A.10
chrI	1246151	Y48G8AL.1		chrI	3086375	M01B12.5		chrI	1059552	Y34D9A.10
chrI	1246152	Y48G8AL.1		chrI	3086398	M01B12.5		chrI	1062627
chrI	1246155	Y48G8AL.1		chrI	3086405	M01B12.5		chrI	1063847
chrI	1249462	Y48G8AL.1		chrI	3090283	M01B12.5		chrI	1063855
chrI	1249464	Y48G8AL.1		chrI	3149004	K09H9.2		chrI	1063856
chrI	1249473	Y48G8AL.1		chrI	3149037	K09H9.2		chrI	1063894
chrI	1249530	Y48G8AL.1		chrI	3149072	K09H9.2		chrI	1063925
chrI	1249546	Y48G8AL.1		chrI	3149700	K09H9.2		chrI	1063926
chrI	1249561	Y48G8AL.1		chrI	3149701	K09H9.2		chrI	1063928
chrI	1249562	Y48G8AL.1		chrI	3149736	K09H9.2		chrI	1064093
chrI	1249580	Y48G8AL.1		chrI	3156946			chrI	1064115
chrI	1249592	Y48G8AL.1		chrI	3156951			chrI	1064120
chrI	1249600	Y48G8AL.1		chrI	3167505	Y54E10A.6		chrI	1064125
chrI	1249616	Y48G8AL.1		chrI	3167510	Y54E10A.6		chrI	1064130
chrI	1249617	Y48G8AL.1		chrI	3167523	Y54E10A.6		chrI	1064131
chrI	1249708	Y48G8AL.1		chrI	3167527	Y54E10A.6		chrI	1064138
chrI	1249710	Y48G8AL.1		chrI	3167530	Y54E10A.6		chrI	1064535
chrI	1249719	Y48G8AL.1		chrI	3167534	Y54E10A.6		chrI	1065182
chrI	1249720	Y48G8AL.1		chrI	3167558			chrI	1065591	Y34D9A.10
chrI	1249722	Y48G8AL.1		chrI	3167559			chrI	1066280	Y34D9A.10
chrI	1249732	Y48G8AL.1		chrI	3167578			chrI	1066300	Y34D9A.10
chrI	1249763	Y48G8AL.1		chrI	3167581			chrI	1066554	Y34D9A.10
chrI	1249768	Y48G8AL.1		chrI	3167582			chrI	1068741	R06A10.2
chrI	1249769	Y48G8AL.1		chrI	3167598			chrI	1068742	R06A10.2
chrI	1249775	Y48G8AL.1		chrI	3167600			chrI	1069597	R06A10.2
chrI	1249784	Y48G8AL.1		chrI	3167604			chrI	1071651	R06A10.2
chrI	1249794	Y48G8AL.1		chrI	3167606			chrI	1094431	R06A10.4
chrI	1249806	Y48G8AL.1		chrI	3167609			chrI	1101596
chrI	1249815	Y48G8AL.1		chrI	3167613			chrI	1101597
chrI	1249828	Y48G8AL.1		chrI	3167614			chrI	1101602
chrI	1249831	Y48G8AL.1		chrI	3167618			chrI	1101605
chrI	1249842	Y48G8AL.1		chrI	3167620			chrI	1101607
chrI	1249851	Y48G8AL.1		chrI	3167621			chrI	1101608
chrI	1249852	Y48G8AL.1		chrI	3167625			chrI	1101612
chrI	1249864	Y48G8AL.1		chrI	3167638			chrI	1101615
chrI	1249865	Y48G8AL.1		chrI	3167648			chrI	1101616
chrI	1249871	Y48G8AL.1		chrI	3167651			chrI	1101617
chrI	1249883	Y48G8AL.1		chrI	3167664			chrI	1101618
chrI	1249884	Y48G8AL.1		chrI	3167751	Y54E10A.5		chrI	1101637
chrI	1249888	Y48G8AL.1		chrI	3167753	Y54E10A.5		chrI	1118562
chrI	1249891	Y48G8AL.1		chrI	3167763	Y54E10A.5		chrI	1120504
chrI	1249899	Y48G8AL.1		chrI	3167773	Y54E10A.5		chrI	1128413	ZK993.1
chrI	1249930	Y48G8AL.1		chrI	3167775	Y54E10A.5		chrI	1138296	Y48G8AL.9
chrI	1249934	Y48G8AL.1		chrI	3167778	Y54E10A.5		chrI	1138300	Y48G8AL.9
chrI	1249937	Y48G8AL.1		chrI	3167779	Y54E10A.5		chrI	1138301	Y48G8AL.9
chrI	1249945	Y48G8AL.1		chrI	3167788	Y54E10A.5		chrI	1138302	Y48G8AL.9
chrI	1249973	Y48G8AL.1		chrI	3167794	Y54E10A.5		chrI	1138308	Y48G8AL.9
chrI	1249983	Y48G8AL.1		chrI	3167799	Y54E10A.5		chrI	1138311	Y48G8AL.9
chrI	1249996	Y48G8AL.1		chrI	3167800	Y54E10A.5		chrI	1138327	Y48G8AL.9
chrI	1250017	Y48G8AL.1		chrI	3167806	Y54E10A.5		chrI	1138329	Y48G8AL.9
chrI	1250019	Y48G8AL.1		chrI	3167812	Y54E10A.5		chrI	1138331	Y48G8AL.9
chrI	1250085	Y48G8AL.1		chrI	3167814	Y54E10A.5		chrI	1138332	Y48G8AL.9
chrI	1250096	Y48G8AL.1		chrI	3167824	Y54E10A.5		chrI	1138339	Y48G8AL.9
chrI	1252603	Y48G8AL.1		chrI	3167831	Y54E10A.5		chrI	1138340	Y48G8AL.9
chrI	1252606	Y48G8AL.1		chrI	3167834	Y54E10A.5		chrI	1138345	Y48G8AL.9
chrI	1252612	Y48G8AL.1		chrI	3167844	Y54E10A.5		chrI	1138353	Y48G8AL.9
chrI	1252616	Y48G8AL.1		chrI	3167845	Y54E10A.5		chrI	1138355	Y48G8AL.9
chrI	1252621	Y48G8AL.1		chrI	3167846	Y54E10A.5		chrI	1138362	Y48G8AL.9
chrI	1252664	Y48G8AL.1		chrI	3167852	Y54E10A.5		chrI	1138442	Y48G8AL.9
chrI	1252669	Y48G8AL.1		chrI	3167861	Y54E10A.5		chrI	1138602	Y48G8AL.9
chrI	1252739	Y48G8AL.1		chrI	3167862	Y54E10A.5		chrI	1138603	Y48G8AL.9
chrI	1252823	Y48G8AL.1		chrI	3167863	Y54E10A.5		chrI	1138607	Y48G8AL.9
chrI	1252824	Y48G8AL.1		chrI	3167901	Y54E10A.5		chrI	1138617	Y48G8AL.9
chrI	1252867	Y48G8AL.1		chrI	3173969	Y54E10A.10		chrI	1138618	Y48G8AL.9
chrI	1252887	Y48G8AL.1		chrI	3173974	Y54E10A.10		chrI	1138623	Y48G8AL.9
chrI	1252888	Y48G8AL.1		chrI	3173992	Y54E10A.10		chrI	1138627	Y48G8AL.9
chrI	1252916	Y48G8AL.1		chrI	3174365	Y54E10A.10		chrI	1138630	Y48G8AL.9
chrI	1252927	Y48G8AL.1		chrI	3174410	Y54E10A.10		chrI	1138631	Y48G8AL.9
chrI	1252932	Y48G8AL.1		chrI	3174417	Y54E10A.10		chrI	1138641	Y48G8AL.9
chrI	1252973	Y48G8AL.1		chrI	3174425	Y54E10A.10		chrI	1138642	Y48G8AL.9
chrI	1253007	Y48G8AL.1		chrI	3174444	Y54E10A.10		chrI	1138646	Y48G8AL.9
chrI	1253017	Y48G8AL.1		chrI	3174447	Y54E10A.10		chrI	1138647	Y48G8AL.9
chrI	1253092	Y48G8AL.1		chrI	3175791	Y54E10A.10		chrI	1138651	Y48G8AL.9
chrI	1253097	Y48G8AL.1		chrI	3175792	Y54E10A.10		chrI	1138656	Y48G8AL.9
chrI	1253107	Y48G8AL.1		chrI	3175887	Y54E10A.10		chrI	1138661	Y48G8AL.9
chrI	1253110	Y48G8AL.1		chrI	3175893	Y54E10A.10		chrI	1138662	Y48G8AL.9
chrI	1253124	Y48G8AL.1		chrI	3175949	Y54E10A.10		chrI	1138663	Y48G8AL.9
chrI	1253798	Y48G8AL.1		chrI	3175980	Y54E10A.10		chrI	1138664	Y48G8AL.9
chrI	1253856	Y48G8AL.1		chrI	3201372	Y54E10A.13		chrI	1138672	Y48G8AL.9
chrI	1253858	Y48G8AL.1		chrI	3201392	Y54E10A.13		chrI	1138673	Y48G8AL.9
chrI	1253867	Y48G8AL.1		chrI	3229822	Y54E10A.3		chrI	1138678	Y48G8AL.9
chrI	1253868	Y48G8AL.1		chrI	3229825	Y54E10A.3		chrI	1138679	Y48G8AL.9
chrI	1253881	Y48G8AL.1		chrI	3229848	Y54E10A.3		chrI	1138683	Y48G8AL.9
chrI	1253975	Y48G8AL.1		chrI	3229856	Y54E10A.3		chrI	1138692	Y48G8AL.9
chrI	1253989	Y48G8AL.1		chrI	3229879	Y54E10A.3		chrI	1138696	Y48G8AL.9
chrI	1254019	Y48G8AL.1		chrI	3229880	Y54E10A.3		chrI	1138702	Y48G8AL.9
chrI	1254116	Y48G8AL.1		chrI	3230109	Y54E10A.3		chrI	1139053	Y48G8AL.9
chrI	1254126	Y48G8AL.1		chrI	3230117	Y54E10A.3		chrI	1139103	Y48G8AL.9
chrI	1254185	Y48G8AL.1		chrI	3230140	Y54E10A.3		chrI	1139106	Y48G8AL.9
chrI	1254195	Y48G8AL.1		chrI	3230167	Y54E10A.3		chrI	1139161	Y48G8AL.9
chrI	1254199	Y48G8AL.1		chrI	3230174	Y54E10A.3		chrI	1139162	Y48G8AL.9
chrI	1254207	Y48G8AL.1		chrI	3230179	Y54E10A.3		chrI	1139182	Y48G8AL.9
chrI	1254221	Y48G8AL.1		chrI	3230191	Y54E10A.3		chrI	1139387	Y48G8AL.9
chrI	1254245	Y48G8AL.1		chrI	3230193	Y54E10A.3		chrI	1139397	Y48G8AL.9
chrI	1254258	Y48G8AL.1		chrI	3230194	Y54E10A.3		chrI	1139414	Y48G8AL.9
chrI	1254268	Y48G8AL.1		chrI	3230217	Y54E10A.3		chrI	1143384	Y48G8AL.10
chrI	1256167	Y48G8AL.15		chrI	3230225	Y54E10A.3		chrI	1143606	Y48G8AL.10
chrI	1258912			chrI	3230814	Y54E10A.3		chrI	1143611	Y48G8AL.10
chrI	1259001			chrI	3230834	Y54E10A.3		chrI	1143612	Y48G8AL.10
chrI	1259015			chrI	3230916	Y54E10A.3		chrI	1145416	Y48G8AL.10
chrI	1259024			chrI	3230917	Y54E10A.3		chrI	1149062	Y48G8AL.10
chrI	1259025			chrI	3230918	Y54E10A.3		chrI	1149073	Y48G8AL.10
chrI	1259288			chrI	3230919	Y54E10A.3		chrI	1149075	Y48G8AL.10
chrI	1259363			chrI	3230932	Y54E10A.3		chrI	1149078	Y48G8AL.10
chrI	1259374			chrI	3230955	Y54E10A.3		chrI	1149080	Y48G8AL.10
chrI	1259375			chrI	3230971	Y54E10A.3		chrI	1149082	Y48G8AL.10
chrI	1259387			chrI	3230986	Y54E10A.3		chrI	1149083	Y48G8AL.10
chrI	1260294	Y48G8AR.1		chrI	3230998	Y54E10A.3		chrI	1149091	Y48G8AL.10
chrI	1260410	Y48G8AR.1		chrI	3231015	Y54E10A.3		chrI	1149092	Y48G8AL.10
chrI	1260718	Y48G8AR.1		chrI	3231036	Y54E10A.3		chrI	1149093	Y48G8AL.10
chrI	1262167	Y48G8AR.1		chrI	3231043	Y54E10A.3		chrI	1149099	Y48G8AL.10
chrI	1272583			chrI	3231288	Y54E10A.3		chrI	1149100	Y48G8AL.10
chrI	1277030			chrI	3231301	Y54E10A.3		chrI	1149101	Y48G8AL.10
chrI	1312365	K12C11.4		chrI	3231315	Y54E10A.3		chrI	1149106	Y48G8AL.10
chrI	1332775	K12C11.5		chrI	3231489	Y54E10A.3		chrI	1149115	Y48G8AL.10
chrI	1337570	K12C11.6		chrI	3231508	Y54E10A.3		chrI	1149121	Y48G8AL.10
chrI	1347018			chrI	3231513	Y54E10A.3		chrI	1149122	Y48G8AL.10
chrI	1347022			chrI	3231519	Y54E10A.3		chrI	1149127	Y48G8AL.10
chrI	1347083			chrI	3231536	Y54E10A.3		chrI	1149133	Y48G8AL.10
chrI	1347102			chrI	3231544	Y54E10A.3		chrI	1149134	Y48G8AL.10
chrI	1347109			chrI	3231547	Y54E10A.3		chrI	1149136	Y48G8AL.10
chrI	1347110			chrI	3231554	Y54E10A.3		chrI	1149144	Y48G8AL.10
chrI	1347712			chrI	3255877			chrI	1149146	Y48G8AL.10
chrI	1347718			chrI	3275844	W01B11.5		chrI	1149147	Y48G8AL.10
chrI	1347767			chrI	3275886	W01B11.5		chrI	1149148	Y48G8AL.10
chrI	1347875			chrI	3275889	W01B11.5		chrI	1149149	Y48G8AL.10
chrI	1347912			chrI	3345135	Y44E3A.6		chrI	1149167	Y48G8AL.10
chrI	1347921			chrI	3349533	Y44E3A.6		chrI	1149181	Y48G8AL.10
chrI	1347933			chrI	3349534	Y44E3A.6		chrI	1149182	Y48G8AL.10
chrI	1347934			chrI	3410944	K03E5.3		chrI	1149183	Y48G8AL.10
chrI	1347935			chrI	3411014	K03E5.3		chrI	1149184	Y48G8AL.10
chrI	1347944			chrI	3411109	K03E5.3		chrI	1149185	Y48G8AL.10
chrI	1347946			chrI	3411162	K03E5.3		chrI	1149186	Y48G8AL.10
chrI	1347955			chrI	3411323	K03E5.3		chrI	1149193	Y48G8AL.10
chrI	1347964			chrI	3411326	K03E5.3		chrI	1149194	Y48G8AL.10
chrI	1347981			chrI	3411812	K03E5.3		chrI	1149195	Y48G8AL.10
chrI	1347982			chrI	3414126	K03E5.3		chrI	1149196	Y48G8AL.10
chrI	1348002			chrI	3491499	Y47G6A.17		chrI	1149197	Y48G8AL.10
chrI	1348005			chrI	3506752	Y47G6A.7		chrI	1149202	Y48G8AL.10
chrI	1348079			chrI	3506753	Y47G6A.7		chrI	1149204	Y48G8AL.10
chrI	1348090			chrI	3506758	Y47G6A.7		chrI	1149211	Y48G8AL.10
chrI	1348100			chrI	3506769	Y47G6A.7		chrI	1149212	Y48G8AL.10
chrI	1348101			chrI	3506770	Y47G6A.7		chrI	1149213	Y48G8AL.10
chrI	1348102			chrI	3506781	Y47G6A.7		chrI	1149214	Y48G8AL.10
chrI	1348111			chrI	3506897	Y47G6A.7		chrI	1149219	Y48G8AL.10
chrI	1348114			chrI	3506900	Y47G6A.7		chrI	1149220	Y48G8AL.10
chrI	1348121			chrI	3506927	Y47G6A.7		chrI	1149225	Y48G8AL.10
chrI	1348128			chrI	3507565	Y47G6A.7		chrI	1149226	Y48G8AL.10
chrI	1348129			chrI	3507712	Y47G6A.7		chrI	1149231	Y48G8AL.10
chrI	1348151			chrI	3507719	Y47G6A.7		chrI	1149232	Y48G8AL.10
chrI	1348162			chrI	3507732	Y47G6A.7		chrI	1149233	Y48G8AL.10
chrI	1348190			chrI	3507733	Y47G6A.7		chrI	1149243	Y48G8AL.10
chrI	1348203			chrI	3515182			chrI	1149244	Y48G8AL.10
chrI	1348212			chrI	3515333			chrI	1149245	Y48G8AL.10
chrI	1348215			chrI	3552266	Y47G6A.21		chrI	1149246	Y48G8AL.10
chrI	1348216			chrI	3560378	Y47G6A.22		chrI	1149249	Y48G8AL.10
chrI	1348223			chrI	3560390	Y47G6A.22		chrI	1149250	Y48G8AL.10
chrI	1348226			chrI	3560391	Y47G6A.22		chrI	1149251	Y48G8AL.10
chrI	1348268			chrI	3560543	Y47G6A.22		chrI	1149254	Y48G8AL.10
chrI	1348291			chrI	3560569	Y47G6A.22		chrI	1149255	Y48G8AL.10
chrI	1348294			chrI	3563441			chrI	1149264	Y48G8AL.10
chrI	1348295			chrI	3565442	Y47G6A.23		chrI	1149265	Y48G8AL.10
chrI	1348314			chrI	3612620	Y47G6A.1		chrI	1149267	Y48G8AL.10
chrI	1348346			chrI	3681368			chrI	1149268	Y48G8AL.10
chrI	1348354			chrI	3682617			chrI	1149285	Y48G8AL.10
chrI	1348365			chrI	3689222	D1037.1		chrI	1149286	Y48G8AL.10
chrI	1348371			chrI	3700032			chrI	1152172	Y48G8AL.10
chrI	1348372			chrI	3700524			chrI	1153001	Y48G8AL.10
chrI	1348394			chrI	3704562			chrI	1153929	Y48G8AL.10
chrI	1348395			chrI	3705202			chrI	1153930	Y48G8AL.10
chrI	1348398			chrI	3733798	T12F5.5		chrI	1153938	Y48G8AL.10
chrI	1349042	Y92H12BL.1		chrI	3733808	T12F5.5		chrI	1153939	Y48G8AL.10
chrI	1349050	Y92H12BL.1		chrI	3733812	T12F5.5		chrI	1154600
chrI	1349171	Y92H12BL.1		chrI	3733935	T12F5.5		chrI	1154605
chrI	1350456	Y92H12BL.1		chrI	3733988	T12F5.5		chrI	1154606
chrI	1350496	Y92H12BL.1		chrI	3734294	T12F5.5		chrI	1154607
chrI	1350528	Y92H12BL.1		chrI	3747407	Y8G1A.1		chrI	1154609
chrI	1355409	Y92H12BL.1		chrI	3761533			chrI	1154636
chrI	1355432	Y92H12BL.1		chrI	3762347			chrI	1154637
chrI	1355475	Y92H12BL.1		chrI	3800518	C32E8.10		chrI	1154647
chrI	1355914	Y92H12BL.1		chrI	3861041	T03F1.8		chrI	1154649
chrI	1355937	Y92H12BL.1		chrI	3861047	T03F1.8		chrI	1154651
[truncated: 89,157 more rows]

## Sheet: Novel sites in non-rep regions
Novel sites found in this study				overlap sites with (Zhao et al., 2015; Washburn et al., 2014; Whipple et al., 2015)				Sites not found by this study
Chromosome name	Position in chromosome	Gene name in region		Chromosome name	Position in chromosome	Gene name in region		Chromosome name	Position in chromosome	Gene name in region
chrI	3639			chrI	13650	Y74C9A.2		chrI	2196
chrI	4523	Y74C9A.3		chrI	70739			chrI	2198
chrI	7223	Y74C9A.3		chrI	184321			chrI	2200
chrI	7344	Y74C9A.3		chrI	184344			chrI	2202
chrI	13959	Y74C9A.2		chrI	184403			chrI	2207
chrI	13960	Y74C9A.2		chrI	184434			chrI	2208
chrI	15540	Y74C9A.2		chrI	184979			chrI	2209
chrI	15541	Y74C9A.2		chrI	185045			chrI	2210
chrI	21142	Y74C9A.4		chrI	185056			chrI	2221
chrI	27655	Y74C9A.5		chrI	206059	Y48G1BL.2		chrI	3251
chrI	70561			chrI	294783	C53D5.1		chrI	3253
chrI	70573			chrI	294858	C53D5.1		chrI	3745
chrI	70582			chrI	294868	C53D5.1		chrI	4672	Y74C9A.3
chrI	100762	Y48G1C.7		chrI	294870	C53D5.1		chrI	9421	Y74C9A.3
chrI	113421	F53G12.13		chrI	309882	C53D5.5		chrI	9422	Y74C9A.3
chrI	113424	F53G12.13		chrI	309885	C53D5.5		chrI	9425	Y74C9A.3
chrI	134265	F53G12.5		chrI	318317			chrI	9440	Y74C9A.3
chrI	138676	F53G12.3		chrI	318467			chrI	9445	Y74C9A.3
chrI	141759	F53G12.3		chrI	318468			chrI	9446	Y74C9A.3
chrI	143187	F53G12.3		chrI	517115			chrI	9460	Y74C9A.3
chrI	184433			chrI	517226			chrI	9461	Y74C9A.3
chrI	184957			chrI	538370	Y65B4BR.4		chrI	10813	Y74C9A.2
chrI	185036			chrI	538412	Y65B4BR.4		chrI	11904	Y74C9A.2
chrI	185975			chrI	615458	F56A6.4		chrI	11905	Y74C9A.2
chrI	185984			chrI	622487	F56A6.4		chrI	11917	Y74C9A.2
chrI	233861	Y48G1BM.6		chrI	622496	F56A6.4		chrI	11919	Y74C9A.2
chrI	234848	Y48G1BM.6		chrI	622497	F56A6.4		chrI	11933	Y74C9A.2
chrI	254147			chrI	622513	F56A6.4		chrI	11938	Y74C9A.2
chrI	294591	C53D5.1		chrI	622540	F56A6.4		chrI	11941	Y74C9A.2
chrI	294609	C53D5.1		chrI	622545	F56A6.4		chrI	11942	Y74C9A.2
chrI	294880	C53D5.1		chrI	622554	F56A6.4		chrI	11946	Y74C9A.2
chrI	336605	Y48G1A.3		chrI	622581	F56A6.4		chrI	11956	Y74C9A.2
chrI	337070	Y48G1A.3		chrI	622583	F56A6.4		chrI	11959	Y74C9A.2
chrI	346747	Y48G1A.6		chrI	622590	F56A6.4		chrI	11960	Y74C9A.2
chrI	351911	Y48G1A.1		chrI	622679	F56A6.4		chrI	11961	Y74C9A.2
chrI	357261	R119.1		chrI	622690	F56A6.4		chrI	11966	Y74C9A.2
chrI	362707	R119.1		chrI	622863	F56A6.4		chrI	11967	Y74C9A.2
chrI	369861	R119.2		chrI	622928	F56A6.4		chrI	11969	Y74C9A.2
chrI	390083	R119.5		chrI	622929	F56A6.4		chrI	11972	Y74C9A.2
chrI	391045	R119.5		chrI	622930	F56A6.4		chrI	11977	Y74C9A.2
chrI	411831	Y50C1A.1		chrI	622935	F56A6.4		chrI	11980	Y74C9A.2
chrI	411832	Y50C1A.1		chrI	622939	F56A6.4		chrI	11982	Y74C9A.2
chrI	447412	C07F11.1		chrI	629690			chrI	11986	Y74C9A.2
chrI	496330	Y65B4BL.3		chrI	629691			chrI	11990	Y74C9A.2
chrI	504067	Y65B4BL.4		chrI	629692			chrI	11996	Y74C9A.2
chrI	511055	Y65B4BL.5		chrI	629697			chrI	11997	Y74C9A.2
chrI	514904	Y65B4BL.5		chrI	629716			chrI	11999	Y74C9A.2
chrI	514938	Y65B4BL.5		chrI	629717			chrI	12000	Y74C9A.2
chrI	514940	Y65B4BL.5		chrI	629731			chrI	12004	Y74C9A.2
chrI	514966	Y65B4BL.5		chrI	629759			chrI	12009	Y74C9A.2
chrI	516248	Y65B4BL.5		chrI	629771			chrI	12010	Y74C9A.2
chrI	531754	Y65B4BL.1		chrI	629779			chrI	12011	Y74C9A.2
chrI	536627	Y65B4BR.5		chrI	629783			chrI	12012	Y74C9A.2
chrI	538075	Y65B4BR.4		chrI	629803			chrI	12015	Y74C9A.2
chrI	538080	Y65B4BR.4		chrI	629807			chrI	12016	Y74C9A.2
chrI	538081	Y65B4BR.4		chrI	629810			chrI	12017	Y74C9A.2
chrI	538116	Y65B4BR.4		chrI	629824			chrI	12018	Y74C9A.2
chrI	538117	Y65B4BR.4		chrI	629830			chrI	12020	Y74C9A.2
chrI	538126	Y65B4BR.4		chrI	629835			chrI	12021	Y74C9A.2
chrI	554713	Y65B4BR.3		chrI	629836			chrI	12025	Y74C9A.2
chrI	556622	Y65B4BR.3		chrI	629846			chrI	12035	Y74C9A.2
chrI	615617	F56A6.4		chrI	629887			chrI	12036	Y74C9A.2
chrI	616813	F56A6.4		chrI	629924			chrI	12037	Y74C9A.2
chrI	616817	F56A6.4		chrI	629937			chrI	12041	Y74C9A.2
chrI	616824	F56A6.4		chrI	630079			chrI	12042	Y74C9A.2
chrI	616830	F56A6.4		chrI	630083			chrI	12043	Y74C9A.2
chrI	617064	F56A6.4		chrI	630084			chrI	12048	Y74C9A.2
chrI	617072	F56A6.4		chrI	630088			chrI	12049	Y74C9A.2
chrI	622197	F56A6.4		chrI	630094			chrI	12050	Y74C9A.2
chrI	622200	F56A6.4		chrI	630147			chrI	12052	Y74C9A.2
chrI	622683	F56A6.4		chrI	630170			chrI	12053	Y74C9A.2
chrI	622696	F56A6.4		chrI	630180			chrI	12171	Y74C9A.2
chrI	629740			chrI	630227			chrI	12173	Y74C9A.2
chrI	629741			chrI	630263			chrI	12176	Y74C9A.2
chrI	629781			chrI	630264			chrI	12177	Y74C9A.2
chrI	629787			chrI	630278			chrI	12184	Y74C9A.2
chrI	629797			chrI	630290			chrI	12191	Y74C9A.2
chrI	629813			chrI	630293			chrI	12199	Y74C9A.2
chrI	630236			chrI	630398			chrI	12200	Y74C9A.2
chrI	630250			chrI	630409			chrI	12202	Y74C9A.2
chrI	630794			chrI	630412			chrI	12203	Y74C9A.2
chrI	630806			chrI	630413			chrI	12204	Y74C9A.2
chrI	630822			chrI	630415			chrI	12208	Y74C9A.2
chrI	630841			chrI	630442			chrI	12209	Y74C9A.2
chrI	633308	Y65B4A.6		chrI	630456			chrI	12210	Y74C9A.2
chrI	633314	Y65B4A.6		chrI	630472			chrI	12226	Y74C9A.2
chrI	633392	Y65B4A.6		chrI	630504			chrI	12227	Y74C9A.2
chrI	633418	Y65B4A.6		chrI	630506			chrI	12234	Y74C9A.2
chrI	633709	Y65B4A.6		chrI	630507			chrI	12243	Y74C9A.2
chrI	633710	Y65B4A.6		chrI	630536			chrI	12247	Y74C9A.2
chrI	633713	Y65B4A.6		chrI	630548			chrI	12248	Y74C9A.2
chrI	633743	Y65B4A.6		chrI	630550			chrI	12251	Y74C9A.2
chrI	633745	Y65B4A.6		chrI	630561			chrI	12254	Y74C9A.2
chrI	633895	Y65B4A.6		chrI	630573			chrI	13626	Y74C9A.2
chrI	662109	Y65B4A.8		chrI	630574			chrI	13630	Y74C9A.2
chrI	663098	Y65B4A.8		chrI	630583			chrI	13631	Y74C9A.2
chrI	695810	Y18H1A.2		chrI	630593			chrI	13982	Y74C9A.2
chrI	696229	Y18H1A.2		chrI	630594			chrI	13999	Y74C9A.2
chrI	710385	Y18H1A.3		chrI	630595			chrI	14725	Y74C9A.2
chrI	710386	Y18H1A.3		chrI	630609			chrI	14731	Y74C9A.2
chrI	710408	Y18H1A.3		chrI	630612			chrI	14749	Y74C9A.2
chrI	710419	Y18H1A.3		chrI	630622			chrI	14833	Y74C9A.2
chrI	710420	Y18H1A.3		chrI	630627			chrI	14850	Y74C9A.2
chrI	710464	Y18H1A.3		chrI	630628			chrI	14851	Y74C9A.2
chrI	710474	Y18H1A.3		chrI	630636			chrI	14856	Y74C9A.2
chrI	710481	Y18H1A.3		chrI	630652			chrI	14863	Y74C9A.2
chrI	710849	Y18H1A.3		chrI	630656			chrI	14865	Y74C9A.2
chrI	714311	Y18H1A.3		chrI	630663			chrI	14866	Y74C9A.2
chrI	720359	Y18H1A.6		chrI	630665			chrI	14867	Y74C9A.2
chrI	727376	Y18H1A.6		chrI	630673			chrI	15029	Y74C9A.2
chrI	727382	Y18H1A.6		chrI	630674			chrI	15060	Y74C9A.2
chrI	727410	Y18H1A.6		chrI	630686			chrI	15176	Y74C9A.2
chrI	727412	Y18H1A.6		chrI	630687			chrI	15809	Y74C9A.2
chrI	727413	Y18H1A.6		chrI	630743			chrI	15820	Y74C9A.2
chrI	729961	Y18H1A.6		chrI	630753			chrI	15821	Y74C9A.2
chrI	729969	Y18H1A.6		chrI	630754			chrI	15822	Y74C9A.2
chrI	729972	Y18H1A.6		chrI	630762			chrI	15823	Y74C9A.2
chrI	730000	Y18H1A.6		chrI	630790			chrI	19070	Y74C9A.4
chrI	730006	Y18H1A.6		chrI	630791			chrI	19086	Y74C9A.4
chrI	745299	Y18H1A.13		chrI	630801			chrI	20418	Y74C9A.4
chrI	755728	Y18H1A.9		chrI	630829			chrI	26414	Y74C9A.4
chrI	755744	Y18H1A.9		chrI	630830			chrI	26415	Y74C9A.4
chrI	805649	ZC123.3		chrI	630831			chrI	30788	Y74C9A.5
chrI	836956			chrI	630845			chrI	30811	Y74C9A.5
chrI	836957			chrI	630849			chrI	30833	Y74C9A.5
chrI	836995			chrI	630850			chrI	35853
chrI	855776	Y95B8A.7		chrI	630853			chrI	37713
chrI	859628	Y95B8A.7		chrI	630874			chrI	50667	Y48G1C.4
chrI	859629	Y95B8A.7		chrI	630875			chrI	54969
chrI	863854	Y95B8A.7		chrI	630898			chrI	54971
chrI	894515	Y95B8A.11		chrI	630923			chrI	58670	Y48G1C.5
chrI	901415	Y95B8A.5		chrI	630984			chrI	58671	Y48G1C.5
chrI	901518	Y95B8A.5		chrI	631004			chrI	58681	Y48G1C.5
chrI	901840	Y95B8A.5		chrI	631012			chrI	58696	Y48G1C.5
chrI	901857	Y95B8A.5		chrI	652716	Y65B4A.2		chrI	58697	Y48G1C.5
chrI	901870	Y95B8A.5		chrI	660516	Y65B4A.8		chrI	58708	Y48G1C.5
chrI	901881	Y95B8A.5		chrI	662107	Y65B4A.8		chrI	58709	Y48G1C.5
chrI	901898	Y95B8A.5		chrI	662108	Y65B4A.8		chrI	58742	Y48G1C.5
chrI	903249	Y95B8A.5		chrI	710847	Y18H1A.3		chrI	70721
chrI	903321	Y95B8A.5		chrI	710870	Y18H1A.3		chrI	70726
chrI	905512	Y95B8A.5		chrI	710873	Y18H1A.3		chrI	70731
chrI	950138	Y34D9B.1		chrI	727421	Y18H1A.6		chrI	70740
chrI	950306	Y34D9B.1		chrI	755776	Y18H1A.9		chrI	70753
chrI	974821			chrI	950027	Y34D9B.1		chrI	70765
chrI	1058037	Y34D9A.10		chrI	950063	Y34D9B.1		chrI	71065
chrI	1058186	Y34D9A.10		chrI	950098	Y34D9B.1		chrI	71066
chrI	1058197	Y34D9A.10		chrI	950108	Y34D9B.1		chrI	72748	Y48G1C.2
chrI	1058198	Y34D9A.10		chrI	950232	Y34D9B.1		chrI	72754	Y48G1C.2
chrI	1058209	Y34D9A.10		chrI	950238	Y34D9B.1		chrI	72799	Y48G1C.2
chrI	1058317	Y34D9A.10		chrI	950271	Y34D9B.1		chrI	74446	Y48G1C.2
chrI	1058589	Y34D9A.10		chrI	950368	Y34D9B.1		chrI	74457	Y48G1C.2
chrI	1058613	Y34D9A.10		chrI	974843			chrI	74717	Y48G1C.2
chrI	1061401	Y34D9A.10		chrI	1058565	Y34D9A.10		chrI	75349	Y48G1C.2
chrI	1086176	R06A10.1		chrI	1058575	Y34D9A.10		chrI	75363	Y48G1C.2
chrI	1101300			chrI	1058590	Y34D9A.10		chrI	76208	Y48G1C.2
chrI	1101325			chrI	1058643	Y34D9A.10		chrI	77137	Y48G1C.2
chrI	1101326			chrI	1138365	Y48G8AL.9		chrI	81249	Y48G1C.10
chrI	1138548	Y48G8AL.9		chrI	1138381	Y48G8AL.9		chrI	81257	Y48G1C.10
chrI	1138549	Y48G8AL.9		chrI	1138388	Y48G8AL.9		chrI	81262	Y48G1C.10
chrI	1138553	Y48G8AL.9		chrI	1149120	Y48G8AL.10		chrI	81269	Y48G1C.10
chrI	1138558	Y48G8AL.9		chrI	1149126	Y48G8AL.10		chrI	81270	Y48G1C.10
chrI	1138567	Y48G8AL.9		chrI	1154648			chrI	81271	Y48G1C.10
chrI	1138909	Y48G8AL.9		chrI	1154659			chrI	84881
chrI	1138910	Y48G8AL.9		chrI	1154704			chrI	90488	Y48G1C.11
chrI	1138911	Y48G8AL.9		chrI	1154749			chrI	91494	Y48G1C.9
chrI	1138912	Y48G8AL.9		chrI	1154772			chrI	91515	Y48G1C.9
chrI	1139274	Y48G8AL.9		chrI	1154773			chrI	97725	Y48G1C.7
chrI	1140001	Y48G8AL.9		chrI	1154849			chrI	97769	Y48G1C.7
chrI	1140002	Y48G8AL.9		chrI	1154864			chrI	97787	Y48G1C.7
chrI	1148565	Y48G8AL.10		chrI	1154873			chrI	97920	Y48G1C.7
chrI	1161570	Y48G8AL.7		chrI	1154882			chrI	98566	Y48G1C.7
chrI	1161680	Y48G8AL.7		chrI	1154903			chrI	102538	Y48G1C.8
chrI	1162875	Y48G8AL.7		chrI	1154926			chrI	102587	Y48G1C.8
chrI	1164065	Y48G8AL.11		chrI	1154940			chrI	102796	Y48G1C.8
chrI	1168618	Y48G8AL.11		chrI	1154941			chrI	102864	Y48G1C.8
chrI	1174575	Y48G8AL.11		chrI	1154950			chrI	102870	Y48G1C.8
chrI	1189947	Y48G8AL.6		chrI	1154999			chrI	103140	Y48G1C.8
chrI	1197885	Y48G8AL.5		chrI	1155058			chrI	104821	Y48G1C.8
chrI	1198095	Y48G8AL.5		chrI	1155060			chrI	104822	Y48G1C.8
chrI	1198096	Y48G8AL.5		chrI	1155083			chrI	104828	Y48G1C.8
chrI	1201491	Y48G8AL.5		chrI	1155113			chrI	104853	Y48G1C.8
chrI	1202803	Y48G8AL.5		chrI	1155172			chrI	104854	Y48G1C.8
chrI	1206861	Y48G8AL.5		chrI	1155196			chrI	104867	Y48G1C.8
chrI	1206862	Y48G8AL.5		chrI	1155197			chrI	104872	Y48G1C.8
chrI	1236938	Y48G8AL.1		chrI	1155235			chrI	115122
chrI	1239637	Y48G8AL.1		chrI	1165001	Y48G8AL.11		chrI	115127
chrI	1243500	Y48G8AL.1		chrI	1165247	Y48G8AL.11		chrI	115138
chrI	1243718	Y48G8AL.1		chrI	1168323	Y48G8AL.11		chrI	115149
chrI	1243730	Y48G8AL.1		chrI	1168337	Y48G8AL.11		chrI	116496	F53G12.7
chrI	1245017	Y48G8AL.1		chrI	1168338	Y48G8AL.11		chrI	116531	F53G12.7
chrI	1245671	Y48G8AL.1		chrI	1168378	Y48G8AL.11		chrI	116547	F53G12.7
chrI	1249763	Y48G8AL.1		chrI	1168516	Y48G8AL.11		chrI	116572	F53G12.7
chrI	1249768	Y48G8AL.1		chrI	1198262	Y48G8AL.5		chrI	116617	F53G12.7
chrI	1249769	Y48G8AL.1		chrI	1198284	Y48G8AL.5		chrI	117170	F53G12.7
chrI	1249784	Y48G8AL.1		chrI	1237366	Y48G8AL.1		chrI	126901
chrI	1249794	Y48G8AL.1		chrI	1243499	Y48G8AL.1		chrI	126903
chrI	1249983	Y48G8AL.1		chrI	1245756	Y48G8AL.1		chrI	126935
chrI	1249996	Y48G8AL.1		chrI	1253812	Y48G8AL.1		chrI	128971	F53G12.5
chrI	1250019	Y48G8AL.1		chrI	1253837	Y48G8AL.1		chrI	129091	F53G12.5
chrI	1252603	Y48G8AL.1		chrI	1253884	Y48G8AL.1		chrI	129186	F53G12.5
chrI	1252606	Y48G8AL.1		chrI	1253901	Y48G8AL.1		chrI	129266	F53G12.5
chrI	1252616	Y48G8AL.1		chrI	1254306	Y48G8AL.1		chrI	129289	F53G12.5
chrI	1252621	Y48G8AL.1		chrI	1254307	Y48G8AL.1		chrI	132536	F53G12.5
chrI	1252739	Y48G8AL.1		chrI	1258893			chrI	132539	F53G12.5
chrI	1252824	Y48G8AL.1		chrI	1258904			chrI	133557	F53G12.5
chrI	1252887	Y48G8AL.1		chrI	1258914			chrI	139541	F53G12.3
chrI	1252927	Y48G8AL.1		chrI	1258924			chrI	139572	F53G12.3
chrI	1252932	Y48G8AL.1		chrI	1258948			chrI	139810	F53G12.3
chrI	1253007	Y48G8AL.1		chrI	1258961			chrI	139821	F53G12.3
chrI	1253092	Y48G8AL.1		chrI	1258962			chrI	146609	F56C11.1
chrI	1253097	Y48G8AL.1		chrI	1258971			chrI	146623	F56C11.1
chrI	1253107	Y48G8AL.1		chrI	1258977			chrI	146624	F56C11.1
chrI	1253798	Y48G8AL.1		chrI	1258978			chrI	146633	F56C11.1
chrI	1253856	Y48G8AL.1		chrI	1259016			chrI	146697	F56C11.1
chrI	1253858	Y48G8AL.1		chrI	1259018			chrI	146711	F56C11.1
chrI	1253867	Y48G8AL.1		chrI	1259040			chrI	147095	F56C11.1
chrI	1253868	Y48G8AL.1		chrI	1259067			chrI	147488	F56C11.1
chrI	1253989	Y48G8AL.1		chrI	1259077			chrI	147516	F56C11.1
chrI	1254019	Y48G8AL.1		chrI	1259086			chrI	147573	F56C11.1
chrI	1254185	Y48G8AL.1		chrI	1259096			chrI	147607	F56C11.1
chrI	1254207	Y48G8AL.1		chrI	1259097			chrI	147614	F56C11.1
chrI	1254221	Y48G8AL.1		chrI	1259105			chrI	150593	F56C11.1
chrI	1259288			chrI	1259106			chrI	150644	F56C11.1
chrI	1259363			chrI	1259109			chrI	150980	F56C11.1
chrI	1259375			chrI	1259110			chrI	152156	F56C11.1
chrI	1259387			chrI	1259129			chrI	152298	F56C11.1
chrI	1260294	Y48G8AR.1		chrI	1259179			chrI	158869
chrI	1260410	Y48G8AR.1		chrI	1259180			chrI	158898
chrI	1260718	Y48G8AR.1		chrI	1259190			chrI	158919
chrI	1262167	Y48G8AR.1		chrI	1259191			chrI	158920
chrI	1272583			chrI	1259213			chrI	158933
chrI	1332775	K12C11.5		chrI	1259228			chrI	158934
chrI	1347018			chrI	1259233			chrI	158944
chrI	1347022			chrI	1259240			chrI	158945
chrI	1347102			chrI	1259262			chrI	160332	F56C11.2
chrI	1347109			chrI	1259286			chrI	160909	F56C11.2
chrI	1347110			chrI	1259296			chrI	161713	F56C11.2
chrI	1347933			chrI	1259305			chrI	174022	F56C11.6
chrI	1347934			chrI	1259336			chrI	174674	F56C11.6
chrI	1347935			chrI	1259442			chrI	174679	F56C11.6
chrI	1347944			chrI	1262014	Y48G8AR.1		chrI	174709	F56C11.6
chrI	1347946			chrI	1262015	Y48G8AR.1		chrI	183903	F56C11.4
chrI	1347955			chrI	1347092			chrI	184313
chrI	1347964			chrI	1347103			chrI	184331
chrI	1347981			chrI	1347104			chrI	184346
chrI	1347982			chrI	1347111			chrI	184347
chrI	1349042	Y92H12BL.1		chrI	1347119			chrI	184350
chrI	1349050	Y92H12BL.1		chrI	1347120			chrI	184351
chrI	1350456	Y92H12BL.1		chrI	1347131			chrI	184356
chrI	1356766	Y92H12BL.1		chrI	1347138			chrI	184361
chrI	1358862	Y92H12BL.1		chrI	1347140			chrI	184367
chrI	1358939	Y92H12BL.1		chrI	1347145			chrI	184368
chrI	1358941	Y92H12BL.1		chrI	1347147			chrI	184371
chrI	1358959	Y92H12BL.1		chrI	1347217			chrI	184380
chrI	1358960	Y92H12BL.1		chrI	1347218			chrI	184381
chrI	1358961	Y92H12BL.1		chrI	1347230			chrI	184384
chrI	1359153	Y92H12BL.1		chrI	1347231			chrI	184394
chrI	1359162	Y92H12BL.1		chrI	1347233			chrI	184395
chrI	1359167	Y92H12BL.1		chrI	1347260			chrI	184396
chrI	1359168	Y92H12BL.1		chrI	1347261			chrI	184397
chrI	1369165	Y92H12BL.5		chrI	1347266			chrI	184399
chrI	1369171	Y92H12BL.5		chrI	1347591			chrI	184409
chrI	1369174	Y92H12BL.5		chrI	1347592			chrI	184959
chrI	1369187	Y92H12BL.5		chrI	1347593			chrI	184978
chrI	1369191	Y92H12BL.5		chrI	1347601			chrI	185021
chrI	1369197	Y92H12BL.5		chrI	1347602			chrI	185060
chrI	1369207	Y92H12BL.5		chrI	1347606			chrI	191714	K10E9.1
chrI	1369223	Y92H12BL.5		chrI	1347607			chrI	195150	K10E9.1
chrI	1375141	Y92H12BL.5		chrI	1347608			chrI	195413	K10E9.1
chrI	1376119			chrI	1347616			chrI	195420	K10E9.1
chrI	1376378			chrI	1347617			chrI	198801	K10E9.1
chrI	1376394			chrI	1347623			chrI	198802	K10E9.1
chrI	1376402			chrI	1347677			chrI	198826	K10E9.1
chrI	1376409			chrI	1347685			chrI	198830	K10E9.1
chrI	1376464			chrI	1347686			chrI	198831	K10E9.1
chrI	1377018	Y92H12BL.4		chrI	1347688			chrI	198841	K10E9.1
chrI	1378200	Y92H12BL.4		chrI	1347715			chrI	198845	K10E9.1
chrI	1378211	Y92H12BL.4		chrI	1347716			chrI	198870	K10E9.1
chrI	1386673	Y92H12BM.1		chrI	1347727			chrI	198874	K10E9.1
chrI	1386811	Y92H12BM.1		chrI	1347825			chrI	198886	K10E9.1
chrI	1386830	Y92H12BM.1		chrI	1347849			chrI	198887	K10E9.1
chrI	1387745	Y92H12BM.1		chrI	1347856			chrI	198897	K10E9.1
chrI	1388885	Y92H12BM.1		chrI	1347966			chrI	198899	K10E9.1
chrI	1403213			chrI	1347980			chrI	198900	K10E9.1
chrI	1417431	Y92H12BR.3		chrI	1349251	Y92H12BL.1		chrI	201111	K10E9.1
chrI	1417448	Y92H12BR.3		chrI	1357529	Y92H12BL.1		chrI	201112	K10E9.1
chrI	1417467	Y92H12BR.3		chrI	1358481	Y92H12BL.1		chrI	201115	K10E9.1
chrI	1417492	Y92H12BR.3		chrI	1358491	Y92H12BL.1		chrI	201117	K10E9.1
chrI	1417536	Y92H12BR.3		chrI	1358496	Y92H12BL.1		chrI	201123	K10E9.1
chrI	1417564	Y92H12BR.3		chrI	1358503	Y92H12BL.1		chrI	201130	K10E9.1
chrI	1417785	Y92H12BR.3		chrI	1358504	Y92H12BL.1		chrI	201131	K10E9.1
chrI	1417786	Y92H12BR.3		chrI	1358506	Y92H12BL.1		chrI	201138	K10E9.1
chrI	1417846	Y92H12BR.3		chrI	1358516	Y92H12BL.1		chrI	201140	K10E9.1
chrI	1417847	Y92H12BR.3		chrI	1358517	Y92H12BL.1		chrI	204292	Y48G1BL.2
chrI	1417895	Y92H12BR.3		chrI	1358528	Y92H12BL.1		chrI	204390	Y48G1BL.2
chrI	1417896	Y92H12BR.3		chrI	1358529	Y92H12BL.1		chrI	205701	Y48G1BL.2
chrI	1417902	Y92H12BR.3		chrI	1358550	Y92H12BL.1		chrI	205703	Y48G1BL.2
chrI	1417925	Y92H12BR.3		chrI	1358556	Y92H12BL.1		chrI	205997	Y48G1BL.2
chrI	1417951	Y92H12BR.3		chrI	1358569	Y92H12BL.1		chrI	206013	Y48G1BL.2
chrI	1417974	Y92H12BR.3		chrI	1358580	Y92H12BL.1		chrI	212336	Y48G1BL.3
chrI	1417981	Y92H12BR.3		chrI	1358584	Y92H12BL.1		chrI	213983	Y48G1BL.3
chrI	1417983	Y92H12BR.3		chrI	1358585	Y92H12BL.1		chrI	222058
chrI	1418056	Y92H12BR.3		chrI	1358586	Y92H12BL.1		chrI	222059
chrI	1418059	Y92H12BR.3		chrI	1358587	Y92H12BL.1		chrI	222068
chrI	1418090	Y92H12BR.3		chrI	1358622	Y92H12BL.1		chrI	222069
chrI	1418171	Y92H12BR.3		chrI	1358699	Y92H12BL.1		chrI	222078
chrI	1418216	Y92H12BR.3		chrI	1358719	Y92H12BL.1		chrI	222092
chrI	1418228	Y92H12BR.3		chrI	1358742	Y92H12BL.1		chrI	222093
chrI	1418232	Y92H12BR.3		chrI	1358743	Y92H12BL.1		chrI	222121
chrI	1418233	Y92H12BR.3		chrI	1358753	Y92H12BL.1		chrI	222124
chrI	1418343	Y92H12BR.3		chrI	1358763	Y92H12BL.1		chrI	222153
chrI	1418346	Y92H12BR.3		chrI	1358764	Y92H12BL.1		chrI	222191
chrI	1418439	Y92H12BR.3		chrI	1358765	Y92H12BL.1		chrI	247605
chrI	1418449	Y92H12BR.3		chrI	1358771	Y92H12BL.1		chrI	250461	Y48G1BM.8
chrI	1418462	Y92H12BR.3		chrI	1358772	Y92H12BL.1		chrI	250465	Y48G1BM.8
chrI	1418494	Y92H12BR.3		chrI	1358773	Y92H12BL.1		chrI	250494	Y48G1BM.8
chrI	1418709	Y92H12BR.3		chrI	1358778	Y92H12BL.1		chrI	250499	Y48G1BM.8
chrI	1419580	Y92H12BR.3		chrI	1358789	Y92H12BL.1		chrI	250508	Y48G1BM.8
chrI	1422335	Y92H12BR.3		chrI	1358790	Y92H12BL.1		chrI	250517	Y48G1BM.8
chrI	1422344	Y92H12BR.3		chrI	1358801	Y92H12BL.1		chrI	250522	Y48G1BM.8
chrI	1422407	Y92H12BR.3		chrI	1358812	Y92H12BL.1		chrI	250532	Y48G1BM.8
chrI	1422410	Y92H12BR.3		chrI	1358826	Y92H12BL.1		chrI	250588	Y48G1BM.8
chrI	1422451	Y92H12BR.3		chrI	1358850	Y92H12BL.1		chrI	250600	Y48G1BM.8
chrI	1422461	Y92H12BR.3		chrI	1358855	Y92H12BL.1		chrI	250601	Y48G1BM.8
chrI	1422519	Y92H12BR.3		chrI	1358864	Y92H12BL.1		chrI	250614	Y48G1BM.8
chrI	1422531	Y92H12BR.3		chrI	1358891	Y92H12BL.1		chrI	257628
chrI	1422536	Y92H12BR.3		chrI	1358892	Y92H12BL.1		chrI	282357
chrI	1422582	Y92H12BR.3		chrI	1358905	Y92H12BL.1		chrI	282461
chrI	1423391	Y92H12BR.3		chrI	1358917	Y92H12BL.1		chrI	294792	C53D5.1
chrI	1434697			chrI	1358922	Y92H12BL.1		chrI	294793	C53D5.1
chrI	1437861	Y92H12BR.8		chrI	1358924	Y92H12BL.1		chrI	294799	C53D5.1
chrI	1437868	Y92H12BR.8		chrI	1358930	Y92H12BL.1		chrI	294812	C53D5.1
chrI	1437969	Y92H12BR.8		chrI	1358935	Y92H12BL.1		chrI	294813	C53D5.1
chrI	1438122	Y92H12BR.8		chrI	1358940	Y92H12BL.1		chrI	294814	C53D5.1
chrI	1438925	Y92H12BR.8		chrI	1358957	Y92H12BL.1		chrI	294816	C53D5.1
chrI	1438968	Y92H12BR.8		chrI	1359040	Y92H12BL.1		chrI	294820	C53D5.1
chrI	1438985	Y92H12BR.8		chrI	1359049	Y92H12BL.1		chrI	294825	C53D5.1
chrI	1439617	Y92H12BR.8		chrI	1359062	Y92H12BL.1		chrI	294835	C53D5.1
chrI	1440063	Y92H12BR.8		chrI	1359065	Y92H12BL.1		chrI	294838	C53D5.1
chrI	1440376	Y92H12BR.8		chrI	1359068	Y92H12BL.1		chrI	305051	C53D5.1
chrI	1440383	Y92H12BR.8		chrI	1359069	Y92H12BL.1		chrI	309839	C53D5.5
chrI	1466653	F47G6.3		chrI	1359097	Y92H12BL.1		chrI	309850	C53D5.5
chrI	1490387	F47G6.1		chrI	1359098	Y92H12BL.1		chrI	309852	C53D5.5
chrI	1491586	Y92H12A.5		chrI	1359099	Y92H12BL.1		chrI	309853	C53D5.5
chrI	1491591	Y92H12A.5		chrI	1359104	Y92H12BL.1		chrI	309862	C53D5.5
chrI	1491683	Y92H12A.5		chrI	1359110	Y92H12BL.1		chrI	309863	C53D5.5
chrI	1491705	Y92H12A.5		chrI	1359111	Y92H12BL.1		chrI	309866	C53D5.5
chrI	1491845	Y92H12A.5		chrI	1359113	Y92H12BL.1		chrI	309878	C53D5.5
chrI	1491894	Y92H12A.5		chrI	1359155	Y92H12BL.1		chrI	309895	C53D5.5
chrI	1494217	Y92H12A.5		chrI	1359164	Y92H12BL.1		chrI	309900	C53D5.5
chrI	1505628	Y92H12A.5		chrI	1359169	Y92H12BL.1		chrI	309904	C53D5.5
chrI	1508145	Y92H12A.5		chrI	1359180	Y92H12BL.1		chrI	309907	C53D5.5
chrI	1516405	Y92H12A.4		chrI	1359190	Y92H12BL.1		chrI	309908	C53D5.5
chrI	1517311	Y92H12A.4		chrI	1359194	Y92H12BL.1		chrI	309916	C53D5.5
chrI	1517312	Y92H12A.4		chrI	1359198	Y92H12BL.1		chrI	309937	C53D5.5
chrI	1517330	Y92H12A.4		chrI	1359204	Y92H12BL.1		chrI	310039	C53D5.5
chrI	1517333	Y92H12A.4		chrI	1359213	Y92H12BL.1		chrI	310040	C53D5.5
chrI	1521733	Y92H12A.4		chrI	1359214	Y92H12BL.1		chrI	310057	C53D5.5
chrI	1521736	Y92H12A.4		chrI	1359218	Y92H12BL.1		chrI	310060	C53D5.5
chrI	1521746	Y92H12A.4		chrI	1359219	Y92H12BL.1		chrI	310063	C53D5.5
chrI	1546290	Y92H12A.2		chrI	1359229	Y92H12BL.1		chrI	310074	C53D5.5
chrI	1546292	Y92H12A.2		chrI	1359236	Y92H12BL.1		chrI	310075	C53D5.5
chrI	1564366			chrI	1359250	Y92H12BL.1		chrI	310090	C53D5.5
chrI	1564367			chrI	1359251	Y92H12BL.1		chrI	312286	C53D5.6
chrI	1564385			chrI	1359258	Y92H12BL.1		chrI	312447	C53D5.6
chrI	1567129	Y92H12A.1		chrI	1359259	Y92H12BL.1		chrI	312490	C53D5.6
chrI	1567140	Y92H12A.1		chrI	1359260	Y92H12BL.1		chrI	313663	C53D5.6
chrI	1567189	Y92H12A.1		chrI	1359261	Y92H12BL.1		chrI	314053	C53D5.6
chrI	1567207	Y92H12A.1		chrI	1359262	Y92H12BL.1		chrI	314242	C53D5.6
chrI	1567208	Y92H12A.1		chrI	1359265	Y92H12BL.1		chrI	314554	C53D5.6
chrI	1569040	Y92H12A.1		chrI	1359267	Y92H12BL.1		chrI	314694	C53D5.6
chrI	1569792	Y92H12A.1		chrI	1359352	Y92H12BL.1		chrI	314947	C53D5.6
chrI	1570032	Y92H12A.1		chrI	1359353	Y92H12BL.1		chrI	318204
chrI	1576084	Y92H12A.1		chrI	1359362	Y92H12BL.1		chrI	318307
chrI	1576506	Y92H12A.1		chrI	1359363	Y92H12BL.1		chrI	318322
chrI	1576789	Y92H12A.1		chrI	1359369	Y92H12BL.1		chrI	318329
chrI	1576823	Y92H12A.1		chrI	1359373	Y92H12BL.1		chrI	318330
chrI	1576867	Y92H12A.1		chrI	1359374	Y92H12BL.1		chrI	318359
chrI	1576882	Y92H12A.1		chrI	1359388	Y92H12BL.1		chrI	318491
chrI	1576883	Y92H12A.1		chrI	1359397	Y92H12BL.1		chrI	320094	Y48G1A.5
chrI	1576950	Y92H12A.1		chrI	1359403	Y92H12BL.1		chrI	321662	Y48G1A.5
chrI	1578050	Y92H12A.1		chrI	1359426	Y92H12BL.1		chrI	322050	Y48G1A.5
chrI	1578073	Y92H12A.1		chrI	1359431	Y92H12BL.1		chrI	322148	Y48G1A.5
chrI	1578087	Y92H12A.1		chrI	1359436	Y92H12BL.1		chrI	325823	Y48G1A.4
chrI	1578088	Y92H12A.1		chrI	1359460	Y92H12BL.1		chrI	325824	Y48G1A.4
chrI	1614154	Y73E7A.9		chrI	1359476	Y92H12BL.1		chrI	330526	Y48G1A.4
chrI	1614159	Y73E7A.9		chrI	1359477	Y92H12BL.1		chrI	330534	Y48G1A.4
chrI	1614217	Y73E7A.9		chrI	1359479	Y92H12BL.1		chrI	330535	Y48G1A.4
chrI	1614316	Y73E7A.9		chrI	1359492	Y92H12BL.1		chrI	330547	Y48G1A.4
chrI	1614326	Y73E7A.9		chrI	1359499	Y92H12BL.1		chrI	330590	Y48G1A.4
chrI	1614329	Y73E7A.9		chrI	1359508	Y92H12BL.1		chrI	330591	Y48G1A.4
chrI	1615424	Y73E7A.9		chrI	1375836	Y92H12BL.5		chrI	336354	Y48G1A.3
chrI	1620774			chrI	1375851	Y92H12BL.5		chrI	336359	Y48G1A.3
chrI	1620845			chrI	1375897			chrI	336364	Y48G1A.3
chrI	1620850			chrI	1375906			chrI	336365	Y48G1A.3
chrI	1631327	Y73E7A.1		chrI	1375917			chrI	336394	Y48G1A.3
chrI	1631489	Y73E7A.1		chrI	1375918			chrI	336404	Y48G1A.3
chrI	1666693	Y71G12B.22		chrI	1375919			chrI	336405	Y48G1A.3
chrI	1674486	Y71G12B.35		chrI	1375922			chrI	336475	Y48G1A.3
chrI	1674638	Y71G12B.35		chrI	1375978			chrI	336476	Y48G1A.3
chrI	1674678	Y71G12B.35		chrI	1376000			chrI	336485	Y48G1A.3
chrI	1674679	Y71G12B.35		chrI	1376030			chrI	336497	Y48G1A.3
chrI	1674691	Y71G12B.35		chrI	1376036			chrI	336517	Y48G1A.3
chrI	1696254			chrI	1376045			chrI	336518	Y48G1A.3
chrI	1696406			chrI	1376046			chrI	336525	Y48G1A.3
chrI	1697202			chrI	1376109			chrI	336526	Y48G1A.3
chrI	1697770			chrI	1376118			chrI	336530	Y48G1A.3
chrI	1701788	Y71G12B.14		chrI	1376123			chrI	336531	Y48G1A.3
chrI	1703670	Y71G12B.13		chrI	1376142			chrI	336552	Y48G1A.3
chrI	1703672	Y71G12B.13		chrI	1376216			chrI	336553	Y48G1A.3
chrI	1703684	Y71G12B.13		chrI	1376219			chrI	336564	Y48G1A.3
chrI	1703685	Y71G12B.13		chrI	1376226			chrI	336606	Y48G1A.3
chrI	1703687	Y71G12B.13		chrI	1376419			chrI	336616	Y48G1A.3
chrI	1703688	Y71G12B.13		chrI	1376420			chrI	344718	Y48G1A.6
chrI	1703689	Y71G12B.13		chrI	1376430			chrI	344729	Y48G1A.6
chrI	1703694	Y71G12B.13		chrI	1376432			chrI	344741	Y48G1A.6
chrI	1703699	Y71G12B.13		chrI	1376440			chrI	344761	Y48G1A.6
chrI	1703707	Y71G12B.13		chrI	1376445			chrI	344762	Y48G1A.6
chrI	1703708	Y71G12B.13		chrI	1376450			chrI	344770	Y48G1A.6
chrI	1703864	Y71G12B.13		chrI	1376457			chrI	344771	Y48G1A.6
chrI	1706402	Y71G12B.13		chrI	1376463			chrI	344797	Y48G1A.6
chrI	1706450	Y71G12B.13		chrI	1376468			chrI	344805	Y48G1A.6
chrI	1706519	Y71G12B.13		chrI	1376475			chrI	344816	Y48G1A.6
chrI	1741903	Y71G12B.24		chrI	1376486			chrI	346442	Y48G1A.6
chrI	1745257	Y71G12B.24		chrI	1376488			chrI	348104
chrI	1748849	Y71G12B.24		chrI	1376534			chrI	365076	R119.7
chrI	1752061	Y71G12B.10		chrI	1376535			chrI	365662	R119.7
chrI	1752089	Y71G12B.10		chrI	1376542			chrI	368188	R119.7
chrI	1752096	Y71G12B.10		chrI	1376547			chrI	368878	R119.2
chrI	1752110	Y71G12B.10		chrI	1376548			chrI	368910	R119.2
chrI	1752267	Y71G12B.10		chrI	1376549			chrI	379303	R119.4
chrI	1752272	Y71G12B.10		chrI	1376550			chrI	380279	R119.4
chrI	1752273	Y71G12B.10		chrI	1376558			chrI	380697	R119.4
chrI	1752280	Y71G12B.10		chrI	1376567			chrI	381223	R119.4
chrI	1752284	Y71G12B.10		chrI	1386697	Y92H12BM.1		chrI	383209	R119.6
chrI	1752303	Y71G12B.10		chrI	1386698	Y92H12BM.1		chrI	383211	R119.6
chrI	1752304	Y71G12B.10		chrI	1386786	Y92H12BM.1		chrI	383506	R119.6
chrI	1752309	Y71G12B.10		chrI	1387456	Y92H12BM.1		chrI	389919	R119.5
chrI	1752316	Y71G12B.10		chrI	1387671	Y92H12BM.1		chrI	389930	R119.5
chrI	1753066	Y71G12B.10		chrI	1387734	Y92H12BM.1		chrI	389931	R119.5
chrI	1753067	Y71G12B.10		chrI	1387744	Y92H12BM.1		chrI	389942	R119.5
chrI	1753112	Y71G12B.10		chrI	1418024	Y92H12BR.3		chrI	391700	R119.5
chrI	1753123	Y71G12B.10		chrI	1418186	Y92H12BR.3		chrI	391702	R119.5
chrI	1753287	Y71G12B.10		chrI	1418196	Y92H12BR.3		chrI	391709	R119.5
chrI	1753865	Y71G12B.10		chrI	1418217	Y92H12BR.3		chrI	396240
chrI	1790339			chrI	1425477			chrI	396253
chrI	1818631	Y71G12B.30		chrI	1426097			chrI	396254
chrI	1824831	Y71G12B.1		chrI	1426098			chrI	402306	Y50C1A.1
chrI	1824844	Y71G12B.1		chrI	1426110			chrI	408692	Y50C1A.1
chrI	1824855	Y71G12B.1		chrI	1426111			chrI	409063	Y50C1A.1
chrI	1824856	Y71G12B.1		chrI	1426113			chrI	409069	Y50C1A.1
chrI	1824866	Y71G12B.1		chrI	1426146			chrI	410524	Y50C1A.1
chrI	1824957	Y71G12B.1		chrI	1426160			chrI	411636	Y50C1A.1
chrI	1824971	Y71G12B.1		chrI	1426170			chrI	411638	Y50C1A.1
chrI	1825005	Y71G12B.1		chrI	1426394			chrI	411645	Y50C1A.1
chrI	1825089	Y71G12B.1		chrI	1426904			chrI	411652	Y50C1A.1
chrI	1825103	Y71G12B.1		chrI	1434335			chrI	411656	Y50C1A.1
chrI	1825113	Y71G12B.1		chrI	1434357			chrI	413401	Y50C1A.2
chrI	1825122	Y71G12B.1		chrI	1434368			chrI	413402	Y50C1A.2
chrI	1825127	Y71G12B.1		chrI	1434371			chrI	413752	Y50C1A.2
chrI	1825131	Y71G12B.1		chrI	1434407			chrI	413766	Y50C1A.2
chrI	1825138	Y71G12B.1		chrI	1434480			chrI	413767	Y50C1A.2
chrI	1825150	Y71G12B.1		chrI	1434513			chrI	413774	Y50C1A.2
chrI	1825179	Y71G12B.1		chrI	1434514			chrI	413775	Y50C1A.2
chrI	1825186	Y71G12B.1		chrI	1434559			chrI	413846	Y50C1A.2
chrI	1825249	Y71G12B.1		chrI	1434693			chrI	418460	Y50C1A.2
chrI	1843225	M01D7.6		chrI	1434861			chrI	431630
chrI	1854159	M01D7.9		chrI	1437841	Y92H12BR.8		chrI	431632
chrI	1854170	M01D7.9		chrI	1438977	Y92H12BR.8		chrI	431633
chrI	1854539	M01D7.9		chrI	1439188	Y92H12BR.8		chrI	431635
chrI	1854645	M01D7.9		chrI	1439231	Y92H12BR.8		chrI	431636
chrI	1864216	M01D7.2		chrI	1491925	Y92H12A.5		chrI	431638
chrI	1864366	M01D7.2		chrI	1491947	Y92H12A.5		chrI	431639
chrI	1864376	M01D7.2		chrI	1493765	Y92H12A.5		chrI	431648
chrI	1864396	M01D7.2		chrI	1493801	Y92H12A.5		chrI	431653
chrI	1864449	M01D7.2		chrI	1493828	Y92H12A.5		chrI	431657
chrI	1864459	M01D7.2		chrI	1493829	Y92H12A.5		chrI	431666
chrI	1864475	M01D7.2		chrI	1493905	Y92H12A.5		chrI	431667
chrI	1864490	M01D7.2		chrI	1494216	Y92H12A.5		chrI	431668
chrI	1867785	M01D7.2		chrI	1545885	Y92H12A.2		chrI	431669
chrI	1867805	M01D7.2		chrI	1554045	Y92H12A.2		chrI	431670
chrI	1868660	M01D7.2		chrI	1554046	Y92H12A.2		chrI	431677
chrI	1868688	M01D7.2		chrI	1554057	Y92H12A.2		chrI	431679
chrI	1868693	M01D7.2		chrI	1554190	Y92H12A.2		chrI	431680
chrI	1868719	M01D7.2		chrI	1565669			chrI	431683
chrI	1868746	M01D7.2		chrI	1566588			chrI	431684
chrI	1868755	M01D7.2		chrI	1566649			chrI	431688
chrI	1868765	M01D7.2		chrI	1566650			chrI	431691
chrI	1868774	M01D7.2		chrI	1569211	Y92H12A.1		chrI	431692
chrI	1868777	M01D7.2		chrI	1576483	Y92H12A.1		chrI	431693
chrI	1871553	M01D7.2		chrI	1577114	Y92H12A.1		chrI	431694
chrI	1882386	Y71G12A.3		chrI	1577135	Y92H12A.1		chrI	431695
chrI	1882592	Y71G12A.3		chrI	1577183	Y92H12A.1		chrI	431698
chrI	1895667	Y71G12A.2		chrI	1577225	Y92H12A.1		chrI	431704
chrI	1896024	Y71G12A.2		chrI	1577226	Y92H12A.1		chrI	431708
chrI	1898775	Y71G12A.2		chrI	1631218	Y73E7A.1		chrI	431709
chrI	1898809	Y71G12A.2		chrI	1631246	Y73E7A.1		chrI	431712
chrI	1908013	Y71G12A.2		chrI	1631297	Y73E7A.1		chrI	446167	C07F11.1
chrI	1908014	Y71G12A.2		chrI	1631301	Y73E7A.1		chrI	446173	C07F11.1
chrI	1908015	Y71G12A.2		chrI	1631512	Y73E7A.1		chrI	446180	C07F11.1
chrI	1908020	Y71G12A.2		chrI	1631513	Y73E7A.1		chrI	446186	C07F11.1
chrI	1908027	Y71G12A.2		chrI	1647350	Y71G12B.20		chrI	446220	C07F11.1
chrI	1912336	Y51F10.7		chrI	1647386	Y71G12B.20		chrI	446225	C07F11.1
chrI	1912607	Y51F10.7		chrI	1647398	Y71G12B.20		chrI	446232	C07F11.1
chrI	1912610	Y51F10.7		chrI	1647430	Y71G12B.20		chrI	446288	C07F11.1
chrI	1912862	Y51F10.7		chrI	1674400	Y71G12B.35		chrI	452020	C07F11.1
chrI	1912993	Y51F10.7		chrI	1674451	Y71G12B.35		chrI	452041	C07F11.1
chrI	1913023	Y51F10.7		chrI	1674452	Y71G12B.35		chrI	452051	C07F11.1
chrI	1913024	Y51F10.7		chrI	1696396			chrI	452068	C07F11.1
chrI	1913050	Y51F10.7		chrI	1696420			chrI	452073	C07F11.1
chrI	1913077	Y51F10.7		chrI	1696463			chrI	452249	C07F11.1
chrI	1913110	Y51F10.7		chrI	1696537			chrI	452250	C07F11.1
chrI	1913115	Y51F10.7		chrI	1696580			chrI	452251	C07F11.1
chrI	1913116	Y51F10.7		chrI	1696604			chrI	452252	C07F11.1
chrI	1913136	Y51F10.7		chrI	1696605			chrI	452258	C07F11.1
chrI	1913148	Y51F10.7		chrI	1696764			chrI	452263	C07F11.1
chrI	1913178	Y51F10.7		chrI	1697233			chrI	452288	C07F11.1
chrI	1913220	Y51F10.7		chrI	1697727			chrI	452296	C07F11.1
chrI	1913221	Y51F10.7		chrI	1706381	Y71G12B.13		chrI	452355	C07F11.1
chrI	1913244	Y51F10.7		chrI	1718670			chrI	452365	C07F11.1
chrI	1913257	Y51F10.7		chrI	1718671			chrI	452368	C07F11.1
chrI	1915736			chrI	1741800	Y71G12B.24		chrI	454014	C07F11.1
chrI	1916637			chrI	1751939	Y71G12B.10		chrI	454035	C07F11.1
chrI	1916639			chrI	1751954	Y71G12B.10		chrI	454036	C07F11.1
chrI	1917475	Y51F10.6		chrI	1751959	Y71G12B.10		chrI	454051	C07F11.1
chrI	1917476	Y51F10.6		chrI	1751961	Y71G12B.10		chrI	454052	C07F11.1
chrI	1917477	Y51F10.6		chrI	1752266	Y71G12B.10		chrI	454065	C07F11.1
chrI	1917614	Y51F10.6		chrI	1752301	Y71G12B.10		chrI	454066	C07F11.1
chrI	1917657	Y51F10.6		chrI	1752302	Y71G12B.10		chrI	454109	C07F11.1
chrI	1917699	Y51F10.6		chrI	1752457	Y71G12B.10		chrI	454110	C07F11.1
chrI	1917700	Y51F10.6		chrI	1752464	Y71G12B.10		chrI	454114	C07F11.1
chrI	1918426	Y51F10.6		chrI	1752465	Y71G12B.10		chrI	454115	C07F11.1
chrI	1918479	Y51F10.6		chrI	1752466	Y71G12B.10		chrI	454116	C07F11.1
chrI	1918485	Y51F10.6		chrI	1752468	Y71G12B.10		chrI	454121	C07F11.1
chrI	1918508	Y51F10.6		chrI	1752471	Y71G12B.10		chrI	457544	C07F11.1
chrI	1918656	Y51F10.6		chrI	1752473	Y71G12B.10		chrI	457551	C07F11.1
chrI	1918687	Y51F10.6		chrI	1752475	Y71G12B.10		chrI	457963	C07F11.1
chrI	1918712	Y51F10.6		chrI	1752476	Y71G12B.10		chrI	457968	C07F11.1
chrI	1918755	Y51F10.6		chrI	1752504	Y71G12B.10		chrI	458024	C07F11.1
chrI	1918828	Y51F10.6		chrI	1753692	Y71G12B.10		chrI	459278	C07F11.1
chrI	1940642	Y51F10.4		chrI	1753878	Y71G12B.10		chrI	459765	C07F11.1
chrI	1951518	Y51F10.10		chrI	1825248	Y71G12B.1		chrI	461093	C07F11.1
chrI	1951545	Y51F10.10		chrI	1864226	M01D7.2		chrI	461138	C07F11.1
chrI	1951851	Y51F10.10		chrI	1864367	M01D7.2		chrI	461148	C07F11.1
chrI	1951866	Y51F10.10		chrI	1878323	Y71G12A.3		chrI	493261	W04C9.1
chrI	1951920	Y51F10.10		chrI	1878328	Y71G12A.3		chrI	500826	Y65B4BL.3
chrI	1951945	Y51F10.10		chrI	1882368	Y71G12A.3		chrI	500868	Y65B4BL.3
chrI	1951966	Y51F10.10		chrI	1882395	Y71G12A.3		chrI	500914	Y65B4BL.3
chrI	1951975	Y51F10.10		chrI	1912593	Y51F10.7		chrI	504447	Y65B4BL.4
chrI	1951993	Y51F10.10		chrI	1912612	Y51F10.7		chrI	504540	Y65B4BL.4
chrI	1952119	Y51F10.10		chrI	1912631	Y51F10.7		chrI	504547	Y65B4BL.4
chrI	1964747	Y51F10.11		chrI	1912632	Y51F10.7		chrI	505327	Y65B4BL.4
chrI	1987120			chrI	1912867	Y51F10.7		chrI	506815	Y65B4BL.2
chrI	1987148			chrI	1912895	Y51F10.7		chrI	506817	Y65B4BL.2
chrI	1987164			chrI	1913222	Y51F10.7		chrI	506915	Y65B4BL.2
chrI	1987165			chrI	1913256	Y51F10.7		chrI	508701	Y65B4BL.2
chrI	1987355			chrI	1915458			chrI	508715	Y65B4BL.2
chrI	1987365			chrI	1915480			chrI	512866	Y65B4BL.5
chrI	1987368			chrI	1915484			chrI	512921	Y65B4BL.5
chrI	1987372			chrI	1915505			chrI	512935	Y65B4BL.5
chrI	1987400			chrI	1915510			chrI	513453	Y65B4BL.5
chrI	1987407			chrI	1915670			chrI	513537	Y65B4BL.5
chrI	1987408			chrI	1915738			chrI	513571	Y65B4BL.5
chrI	1987462			chrI	1915740			chrI	513815	Y65B4BL.5
chrI	1993808	Y20F4.3		chrI	1916398			chrI	513947	Y65B4BL.5
chrI	2003202	Y20F4.3		chrI	1916407			chrI	514213	Y65B4BL.5
chrI	2003205	Y20F4.3		chrI	1917188	Y51F10.6		chrI	516052	Y65B4BL.5
chrI	2003207	Y20F4.3		chrI	1917200	Y51F10.6		chrI	516053	Y65B4BL.5
chrI	2010165	Y20F4.3		chrI	1917213	Y51F10.6		chrI	517087
chrI	2036267	Y20F4.4		chrI	1917222	Y51F10.6		chrI	517114
chrI	2036300	Y20F4.4		chrI	1917223	Y51F10.6		chrI	517138
chrI	2036490	Y20F4.4		chrI	1917271	Y51F10.6		chrI	517148
chrI	2036496	Y20F4.4		chrI	1917272	Y51F10.6		chrI	517149
chrI	2040002	Y20F4.4		chrI	1917276	Y51F10.6		chrI	517159
chrI	2040008	Y20F4.4		chrI	1917391	Y51F10.6		chrI	517165
chrI	2040198	Y20F4.4		chrI	1917437	Y51F10.6		chrI	517169
chrI	2040231	Y20F4.4		chrI	1917524	Y51F10.6		chrI	517170
chrI	2056502			chrI	1917591	Y51F10.6		chrI	517171
chrI	2056514			chrI	1917629	Y51F10.6		chrI	517175
chrI	2056621			chrI	1917630	Y51F10.6		chrI	517176
chrI	2056790			chrI	1917646	Y51F10.6		chrI	517182
chrI	2056805			chrI	1917656	Y51F10.6		chrI	517183
chrI	2056850			chrI	1918667	Y51F10.6		chrI	517197
chrI	2060360			chrI	1918762	Y51F10.6		chrI	517227
chrI	2060408			chrI	1939783	Y51F10.4		chrI	517251
chrI	2060409			chrI	1940770	Y51F10.4		chrI	517259
chrI	2060525			chrI	1951603	Y51F10.10		chrI	517260
chrI	2060580			chrI	1951640	Y51F10.10		chrI	517261
chrI	2060600			chrI	1951641	Y51F10.10		chrI	517306
chrI	2060601			chrI	1951666	Y51F10.10		chrI	517488
chrI	2060602			chrI	1951688	Y51F10.10		chrI	517494
chrI	2060603			chrI	1951701	Y51F10.10		chrI	517495
chrI	2060611			chrI	1951742	Y51F10.10		chrI	517501
chrI	2060626			chrI	1975327			chrI	517515
chrI	2061927	Y37E3.1		chrI	1975328			chrI	517516
chrI	2062314	Y37E3.1		chrI	1976121			chrI	517517
chrI	2062361	Y37E3.1		chrI	1993786	Y20F4.3		chrI	517520
chrI	2062383	Y37E3.1		chrI	2033869	Y20F4.2		chrI	517521
chrI	2066223	Y37E3.5		chrI	2033881	Y20F4.2		chrI	517528
chrI	2073153	Y37E3.10		chrI	2033884	Y20F4.2		chrI	517529
chrI	2078031			chrI	2033891	Y20F4.2		chrI	517530
chrI	2081349	Y37E3.11		chrI	2033896	Y20F4.2		chrI	517539
chrI	2081520	Y37E3.11		chrI	2033914	Y20F4.2		chrI	517541
chrI	2081522	Y37E3.11		chrI	2034040			chrI	517560
chrI	2081565	Y37E3.11		chrI	2034075			chrI	517561
chrI	2084804	Y37E3.11		chrI	2034078			chrI	517570
chrI	2106075	Y37E3.15		chrI	2034087			chrI	517571
chrI	2113161	Y37E3.15		chrI	2034088			chrI	517577
chrI	2120307	Y37E3.15		chrI	2034871	Y20F4.4		chrI	517583
chrI	2120308	Y37E3.15		chrI	2056370			chrI	517822
chrI	2120472	Y37E3.15		chrI	2056378			chrI	517868
chrI	2121854	Y37E3.15		chrI	2056379			chrI	517902
chrI	2121855	Y37E3.15		chrI	2056380			chrI	520216	Y65B4BL.6
chrI	2121857	Y37E3.15		chrI	2056381			chrI	532560	Y65B4BL.1
chrI	2122338	Y37E3.15		chrI	2056401			chrI	535932	Y65B4BR.5
chrI	2122361	Y37E3.15		chrI	2056408			chrI	536312	Y65B4BR.5
chrI	2124323			chrI	2056456			chrI	536356	Y65B4BR.5
chrI	2129134	Y37E3.17		chrI	2056491			chrI	537349	Y65B4BR.4
chrI	2129162	Y37E3.17		chrI	2056499			chrI	537674	Y65B4BR.4
chrI	2140897	Y37E3.17		chrI	2056572			chrI	538353	Y65B4BR.4
chrI	2140905	Y37E3.17		chrI	2056573			chrI	538355	Y65B4BR.4
chrI	2144026	Y37E3.17		chrI	2056578			chrI	538356	Y65B4BR.4
chrI	2162371	W03F11.6		chrI	2056620			chrI	538373	Y65B4BR.4
chrI	2171358	W03F11.6		chrI	2056654			chrI	538379	Y65B4BR.4
chrI	2171365	W03F11.6		chrI	2056655			chrI	538380	Y65B4BR.4
chrI	2171366	W03F11.6		chrI	2056673			chrI	538381	Y65B4BR.4
chrI	2171391	W03F11.6		chrI	2056674			chrI	538389	Y65B4BR.4
chrI	2171640	W03F11.6		chrI	2056721			chrI	538407	Y65B4BR.4
chrI	2171643	W03F11.6		chrI	2056722			chrI	538413	Y65B4BR.4
chrI	2171645	W03F11.6		chrI	2056789			chrI	538414	Y65B4BR.4
chrI	2204042	W03F11.6		chrI	2056819			chrI	538417	Y65B4BR.4
chrI	2204044	W03F11.6		chrI	2060131			chrI	538418	Y65B4BR.4
chrI	2204050	W03F11.6		chrI	2060132			chrI	538428	Y65B4BR.4
chrI	2204051	W03F11.6		chrI	2060162			chrI	538492	Y65B4BR.4
chrI	2219420	W03F11.5		chrI	2060176			chrI	538565	Y65B4BR.4
chrI	2253177	F12B6.2		chrI	2060191			chrI	539532	Y65B4BR.4
chrI	2282250	Y39G10AL.3		chrI	2060192			chrI	539545	Y65B4BR.4
chrI	2282266	Y39G10AL.3		chrI	2060259			chrI	539553	Y65B4BR.4
chrI	2282273	Y39G10AL.3		chrI	2060260			chrI	540775	Y65B4BR.4
chrI	2282514	Y39G10AL.3		chrI	2060307			chrI	540821	Y65B4BR.4
chrI	2295514	Y39G10AR.11		chrI	2060308			chrI	540878	Y65B4BR.4
chrI	2295573	Y39G10AR.11		chrI	2060326			chrI	541475	Y65B4BR.4
chrI	2296032	Y39G10AR.11		chrI	2060327			chrI	542156	Y65B4BR.4
chrI	2296047	Y39G10AR.11		chrI	2060361			chrI	543133
chrI	2296091	Y39G10AR.11		chrI	2060403			chrI	543134
chrI	2296098	Y39G10AR.11		chrI	2060467			chrI	543135
chrI	2296108	Y39G10AR.11		chrI	2060479			chrI	543150
chrI	2298782	Y39G10AR.12		chrI	2060482			chrI	552517	Y65B4BR.3
chrI	2298819	Y39G10AR.12		chrI	2060490			chrI	552645	Y65B4BR.3
chrI	2298908	Y39G10AR.12		chrI	2060512			chrI	554465	Y65B4BR.3
chrI	2298960	Y39G10AR.12		chrI	2062153	Y37E3.1		chrI	554781	Y65B4BR.3
chrI	2298976	Y39G10AR.12		chrI	2062156	Y37E3.1		chrI	554786	Y65B4BR.3
chrI	2299148	Y39G10AR.12		chrI	2062185	Y37E3.1		chrI	555262	Y65B4BR.3
chrI	2299156	Y39G10AR.12		chrI	2062195	Y37E3.1		chrI	555767	Y65B4BR.3
chrI	2299263	Y39G10AR.12		chrI	2062205	Y37E3.1		chrI	557632	Y65B4BR.2
chrI	2314380	Y39G10AR.8		chrI	2062263	Y37E3.1		chrI	557649	Y65B4BR.2
chrI	2314385	Y39G10AR.8		chrI	2062276	Y37E3.1		chrI	557650	Y65B4BR.2
chrI	2314386	Y39G10AR.8		chrI	2062305	Y37E3.1		chrI	557652	Y65B4BR.2
chrI	2314445	Y39G10AR.8		chrI	2062306	Y37E3.1		chrI	557660	Y65B4BR.2
chrI	2314486	Y39G10AR.8		chrI	2062395	Y37E3.1		chrI	557674	Y65B4BR.2
chrI	2314723	Y39G10AR.8		chrI	2062409	Y37E3.1		chrI	558311	Y65B4BR.2
chrI	2314759	Y39G10AR.8		chrI	2062422	Y37E3.1		chrI	558312	Y65B4BR.2
chrI	2314761	Y39G10AR.8		chrI	2062649	Y37E3.1		chrI	564887	Y65B4BR.1
chrI	2314768	Y39G10AR.8		chrI	2062654	Y37E3.1		chrI	564998	Y65B4BR.1
chrI	2314769	Y39G10AR.8		chrI	2062666	Y37E3.1		chrI	565017	Y65B4BR.1
chrI	2314790	Y39G10AR.8		chrI	2062677	Y37E3.1		chrI	565170	Y65B4BR.1
chrI	2314846	Y39G10AR.8		chrI	2062689	Y37E3.1		chrI	600666	F56A6.2
chrI	2314857	Y39G10AR.8		chrI	2073332	Y37E3.10		chrI	600677	F56A6.2
chrI	2325020	Y39G10AR.15		chrI	2076412	Y37E3.10		chrI	600680	F56A6.2
chrI	2339316			chrI	2076415	Y37E3.10		chrI	600681	F56A6.2
chrI	2339318			chrI	2076420	Y37E3.10		chrI	600693	F56A6.2
chrI	2343441	Y39G10AR.5		chrI	2076485	Y37E3.10		chrI	600699	F56A6.2
chrI	2343697	Y39G10AR.5		chrI	2076489	Y37E3.10		chrI	600705	F56A6.2
chrI	2344797	Y39G10AR.5		chrI	2076610	Y37E3.10		chrI	600709	F56A6.2
chrI	2344904	Y39G10AR.5		chrI	2076613	Y37E3.10		chrI	600715	F56A6.2
chrI	2344925	Y39G10AR.5		chrI	2076623	Y37E3.10		chrI	600716	F56A6.2
chrI	2349745	Y39G10AR.5		chrI	2076632	Y37E3.10		chrI	600719	F56A6.2
chrI	2349926	Y39G10AR.5		chrI	2076633	Y37E3.10		chrI	600726	F56A6.2
chrI	2375856			chrI	2076642	Y37E3.10		chrI	600729	F56A6.2
chrI	2375874			chrI	2076643	Y37E3.10		chrI	600732	F56A6.2
chrI	2375891			chrI	2076647	Y37E3.10		chrI	600733	F56A6.2
chrI	2375940			chrI	2076648	Y37E3.10		chrI	600734	F56A6.2
chrI	2375943			chrI	2076705	Y37E3.10		chrI	600741	F56A6.2
chrI	2375955			chrI	2076769	Y37E3.10		chrI	600742	F56A6.2
chrI	2375957			chrI	2078447			chrI	600754	F56A6.2
chrI	2385367	Y39G10AR.18		chrI	2078748			chrI	600768	F56A6.2
chrI	2385411	Y39G10AR.18		chrI	2078749			chrI	600771	F56A6.2
chrI	2385432	Y39G10AR.18		chrI	2080298	Y37E3.11		chrI	600774	F56A6.2
chrI	2385444	Y39G10AR.18		chrI	2080558	Y37E3.11		chrI	614072
chrI	2385662	Y39G10AR.18		chrI	2080559	Y37E3.11		chrI	614076
chrI	2385730	Y39G10AR.18		chrI	2080570	Y37E3.11		chrI	614092
chrI	2385732	Y39G10AR.18		chrI	2081475	Y37E3.11		chrI	614098
chrI	2385784	Y39G10AR.18		chrI	2081478	Y37E3.11		chrI	614110
chrI	2385886	Y39G10AR.18		chrI	2081674	Y37E3.11		chrI	614116
chrI	2387386	Y39G10AR.18		chrI	2081689	Y37E3.11		chrI	614149
chrI	2387419	Y39G10AR.18		chrI	2081719	Y37E3.11		chrI	614165
chrI	2390219	Y39G10AR.18		chrI	2081767	Y37E3.11		chrI	615463	F56A6.4
chrI	2402772	Y39G10AR.2		chrI	2081768	Y37E3.11		chrI	615484	F56A6.4
chrI	2403624	Y39G10AR.2		chrI	2081777	Y37E3.11		chrI	615502	F56A6.4
chrI	2403656	Y39G10AR.2		chrI	2082418	Y37E3.11		chrI	615514	F56A6.4
chrI	2403662	Y39G10AR.2		chrI	2082419	Y37E3.11		chrI	615515	F56A6.4
chrI	2403753	Y39G10AR.2		chrI	2082432	Y37E3.11		chrI	615577	F56A6.4
chrI	2403776	Y39G10AR.2		chrI	2082433	Y37E3.11		chrI	615578	F56A6.4
chrI	2403783	Y39G10AR.2		chrI	2082503	Y37E3.11		chrI	615586	F56A6.4
chrI	2403898	Y39G10AR.2		chrI	2082517	Y37E3.11		chrI	615589	F56A6.4
chrI	2403928	Y39G10AR.2		chrI	2082694	Y37E3.11		chrI	615596	F56A6.4
chrI	2403953	Y39G10AR.2		chrI	2082698	Y37E3.11		chrI	616707	F56A6.4
chrI	2403987	Y39G10AR.2		chrI	2082700	Y37E3.11		chrI	616721	F56A6.4
chrI	2403992	Y39G10AR.2		chrI	2082703	Y37E3.11		chrI	616761	F56A6.4
chrI	2404130	Y39G10AR.2		chrI	2082727	Y37E3.11		chrI	616775	F56A6.4
chrI	2407285	Y39G10AR.2		chrI	2085978	Y37E3.13		chrI	616778	F56A6.4
chrI	2407325	Y39G10AR.2		chrI	2122360	Y37E3.15		chrI	616788	F56A6.4
chrI	2408153	Y39G10AR.2		chrI	2129161	Y37E3.17		chrI	616823	F56A6.4
chrI	2408194	Y39G10AR.2		chrI	2143746	Y37E3.17		chrI	616833	F56A6.4
chrI	2408317	Y39G10AR.2		chrI	2279702			chrI	619901
chrI	2408334	Y39G10AR.2		chrI	2296048	Y39G10AR.11		chrI	620639
chrI	2408351	Y39G10AR.2		chrI	2296092	Y39G10AR.11		chrI	622474	F56A6.4
chrI	2408358	Y39G10AR.2		chrI	2296093	Y39G10AR.11		chrI	622481	F56A6.4
chrI	2408574	Y39G10AR.2		chrI	2296760	Y39G10AR.11		chrI	622498	F56A6.4
chrI	2408604	Y39G10AR.2		chrI	2296761	Y39G10AR.11		chrI	622499	F56A6.4
chrI	2408607	Y39G10AR.2		chrI	2296765	Y39G10AR.11		chrI	622510	F56A6.4
chrI	2408619	Y39G10AR.2		chrI	2296772	Y39G10AR.11		chrI	622516	F56A6.4
chrI	2408620	Y39G10AR.2		chrI	2296773	Y39G10AR.11		chrI	622517	F56A6.4
chrI	2408624	Y39G10AR.2		chrI	2296787	Y39G10AR.11		chrI	622519	F56A6.4
chrI	2408643	Y39G10AR.2		chrI	2296922	Y39G10AR.11		chrI	622520	F56A6.4
chrI	2408788	Y39G10AR.2		chrI	2296924	Y39G10AR.11		chrI	622527	F56A6.4
chrI	2408808	Y39G10AR.2		chrI	2296927	Y39G10AR.11		chrI	622531	F56A6.4
chrI	2408810	Y39G10AR.2		chrI	2296942	Y39G10AR.11		chrI	622539	F56A6.4
chrI	2408837	Y39G10AR.2		chrI	2296960	Y39G10AR.11		chrI	622541	F56A6.4
chrI	2408840	Y39G10AR.2		chrI	2296962	Y39G10AR.11		chrI	622543	F56A6.4
chrI	2408846	Y39G10AR.2		chrI	2296973	Y39G10AR.11		chrI	622544	F56A6.4
chrI	2415708	F23C8.13		chrI	2296988	Y39G10AR.11		chrI	622553	F56A6.4
chrI	2422605	F23C8.7		chrI	2297001	Y39G10AR.11		chrI	622559	F56A6.4
chrI	2468772			chrI	2297002	Y39G10AR.11		chrI	622573	F56A6.4
chrI	2471944	Y74C10AL.2		chrI	2299112	Y39G10AR.12		chrI	622586	F56A6.4
chrI	2472377	Y74C10AR.3		chrI	2299186	Y39G10AR.12		chrI	622588	F56A6.4
chrI	2474331	Y74C10AR.3		chrI	2314312	Y39G10AR.8		chrI	622591	F56A6.4
chrI	2477874	Y74C10AR.3		chrI	2314387	Y39G10AR.8		chrI	622592	F56A6.4
chrI	2477886	Y74C10AR.3		chrI	2314409	Y39G10AR.8		chrI	622593	F56A6.4
chrI	2486081	Y74C10AR.1		chrI	2314418	Y39G10AR.8		chrI	622663	F56A6.4
chrI	2486451	Y74C10AR.1		chrI	2314444	Y39G10AR.8		chrI	622667	F56A6.4
chrI	2488730	Y74C10AR.1		chrI	2314473	Y39G10AR.8		chrI	622779	F56A6.4
chrI	2488809	Y74C10AR.1		chrI	2314734	Y39G10AR.8		chrI	622821	F56A6.4
chrI	2488829	Y74C10AR.1		chrI	2314735	Y39G10AR.8		chrI	622831	F56A6.4
chrI	2488834	Y74C10AR.1		chrI	2314736	Y39G10AR.8		chrI	622850	F56A6.4
chrI	2488857	Y74C10AR.1		chrI	2314740	Y39G10AR.8		chrI	622851	F56A6.4
chrI	2489143	Y74C10AR.1		chrI	2314782	Y39G10AR.8		chrI	622854	F56A6.4
chrI	2489319	Y74C10AR.1		chrI	2314791	Y39G10AR.8		chrI	622948	F56A6.4
chrI	2489339	Y74C10AR.1		chrI	2314792	Y39G10AR.8		chrI	622962	F56A6.4
chrI	2489346	Y74C10AR.1		chrI	2314797	Y39G10AR.8		chrI	622967	F56A6.4
chrI	2489349	Y74C10AR.1		chrI	2314826	Y39G10AR.8		chrI	622968	F56A6.4
chrI	2489355	Y74C10AR.1		chrI	2314850	Y39G10AR.8		chrI	622969	F56A6.4
chrI	2491181	Y23H5B.6		chrI	2314851	Y39G10AR.8		chrI	622977	F56A6.4
chrI	2491296	Y23H5B.6		chrI	2314856	Y39G10AR.8		chrI	622978	F56A6.4
chrI	2491593	Y23H5B.6		chrI	2375635			chrI	622979	F56A6.4
chrI	2514815			chrI	2375640			chrI	622980	F56A6.4
chrI	2540465	Y23H5B.4		chrI	2375641			chrI	622982	F56A6.4
chrI	2616746	Y23H5A.5		chrI	2375648			chrI	622987	F56A6.4
chrI	2616802	Y23H5A.5		chrI	2375653			chrI	622991	F56A6.4
chrI	2617886	Y23H5A.4		chrI	2375654			chrI	622993	F56A6.4
chrI	2621855	Y23H5A.3		chrI	2375678			chrI	622994	F56A6.4
chrI	2632425			chrI	2375688			chrI	623000	F56A6.4
chrI	2698902	F32B5.2		chrI	2375690			chrI	623001	F56A6.4
chrI	2715245	Y71F9B.5		chrI	2375691			chrI	623002	F56A6.4
chrI	2715254	Y71F9B.5		chrI	2375710			chrI	623003	F56A6.4
chrI	2715374	Y71F9B.5		chrI	2375713			chrI	623004	F56A6.4
chrI	2715851	Y71F9B.5		chrI	2375743			chrI	623008	F56A6.4
chrI	2715901	Y71F9B.5		chrI	2375744			chrI	623027	F56A6.4
chrI	2715904	Y71F9B.5		chrI	2375748			chrI	623028	F56A6.4
chrI	2715973	Y71F9B.5		chrI	2375752			chrI	623042	F56A6.4
chrI	2715979	Y71F9B.5		chrI	2375753			chrI	629682
chrI	2715980	Y71F9B.5		chrI	2375836			chrI	629693
chrI	2716005	Y71F9B.5		chrI	2375839			chrI	629712
chrI	2716012	Y71F9B.5		chrI	2375841			chrI	629719
chrI	2716023	Y71F9B.5		chrI	2375851			chrI	629720
chrI	2716024	Y71F9B.5		chrI	2375857			chrI	629732
chrI	2716025	Y71F9B.5		chrI	2375878			chrI	629745
chrI	2716029	Y71F9B.5		chrI	2376111			chrI	629755
chrI	2716039	Y71F9B.5		chrI	2376120			chrI	629756
chrI	2716081	Y71F9B.5		chrI	2376121			chrI	629757
chrI	2716082	Y71F9B.5		chrI	2376122			chrI	629758
chrI	2716083	Y71F9B.5		chrI	2376123			chrI	629760
chrI	2716095	Y71F9B.5		chrI	2376124			chrI	629762
chrI	2716097	Y71F9B.5		chrI	2376136			chrI	629766
chrI	2716098	Y71F9B.5		chrI	2376174			chrI	629767
chrI	2716110	Y71F9B.5		chrI	2376176			chrI	629768
chrI	2716310	Y71F9B.5		chrI	2376186			chrI	629769
chrI	2716311	Y71F9B.5		chrI	2376189			chrI	629770
chrI	2716436	Y71F9B.5		chrI	2376207			chrI	629782
chrI	2716437	Y71F9B.5		chrI	2378183	Y39G10AR.17		chrI	629784
chrI	2716439	Y71F9B.5		chrI	2385284	Y39G10AR.18		chrI	629785
chrI	2716447	Y71F9B.5		chrI	2385721	Y39G10AR.18		chrI	629789
chrI	2716451	Y71F9B.5		chrI	2385813	Y39G10AR.18		chrI	629790
chrI	2716452	Y71F9B.5		chrI	2390073	Y39G10AR.18		chrI	629793
chrI	2716630	Y71F9B.5		chrI	2390080	Y39G10AR.18		chrI	629794
chrI	2716633	Y71F9B.5		chrI	2394058	Y39G10AR.18		chrI	629795
chrI	2717083	Y71F9B.5		chrI	2394664	Y39G10AR.18		chrI	629796
chrI	2721945			chrI	2394673	Y39G10AR.18		chrI	629798
chrI	2724611	Y71F9B.6		chrI	2394709	Y39G10AR.18		chrI	629799
chrI	2727828			chrI	2394711	Y39G10AR.18		chrI	629802
chrI	2729314			chrI	2394714	Y39G10AR.18		chrI	629804
chrI	2729367			chrI	2394870	Y39G10AR.18		chrI	629809
chrI	2729641			chrI	2394894	Y39G10AR.18		chrI	629815
chrI	2733613	Y71F9B.2		chrI	2394900	Y39G10AR.18		chrI	629816
chrI	2733663	Y71F9B.2		chrI	2394907	Y39G10AR.18		chrI	629817
chrI	2733676	Y71F9B.2		chrI	2403654	Y39G10AR.2		chrI	629818
chrI	2733746	Y71F9B.2		chrI	2403675	Y39G10AR.2		chrI	629820
chrI	2733749	Y71F9B.2		chrI	2403679	Y39G10AR.2		chrI	629823
chrI	2733867	Y71F9B.2		chrI	2403688	Y39G10AR.2		chrI	629825
chrI	2733883	Y71F9B.2		chrI	2403713	Y39G10AR.2		chrI	629826
chrI	2733920	Y71F9B.2		chrI	2403766	Y39G10AR.2		chrI	629834
chrI	2733921	Y71F9B.2		chrI	2403862	Y39G10AR.2		chrI	629837
chrI	2733959	Y71F9B.2		chrI	2403863	Y39G10AR.2		chrI	629839
chrI	2734132	Y71F9B.2		chrI	2403873	Y39G10AR.2		chrI	629840
chrI	2734152	Y71F9B.2		chrI	2403929	Y39G10AR.2		chrI	629843
chrI	2734253	Y71F9B.2		chrI	2403937	Y39G10AR.2		chrI	629844
chrI	2734464	Y71F9B.2		chrI	2403938	Y39G10AR.2		chrI	629845
chrI	2734504	Y71F9B.2		chrI	2404437	Y39G10AR.2		chrI	629847
chrI	2734538	Y71F9B.2		chrI	2404470	Y39G10AR.2		chrI	629848
chrI	2734544	Y71F9B.2		chrI	2404475	Y39G10AR.2		chrI	629853
chrI	2734545	Y71F9B.2		chrI	2408642	Y39G10AR.2		chrI	629897
chrI	2734582	Y71F9B.2		chrI	2408650	Y39G10AR.2		chrI	629898
chrI	2734598	Y71F9B.2		chrI	2408655	Y39G10AR.2		chrI	629906
chrI	2734750	Y71F9B.2		chrI	2408658	Y39G10AR.2		chrI	629907
chrI	2734768	Y71F9B.2		chrI	2408783	Y39G10AR.2		chrI	629923
chrI	2734769	Y71F9B.2		chrI	2415323	F23C8.13		chrI	629927
chrI	2734926	Y71F9B.2		chrI	2415326	F23C8.13		chrI	629932
chrI	2773521	Y71F9B.10		chrI	2415328	F23C8.13		chrI	629938
chrI	2773530	Y71F9B.10		chrI	2415330	F23C8.13		chrI	629942
chrI	2773531	Y71F9B.10		chrI	2415354	F23C8.13		chrI	630058
chrI	2773532	Y71F9B.10		chrI	2415361	F23C8.13		chrI	630073
chrI	2773544	Y71F9B.10		chrI	2415368	F23C8.13		chrI	630087
chrI	2773550	Y71F9B.10		chrI	2415384	F23C8.13		chrI	630089
chrI	2773553	Y71F9B.10		chrI	2415385	F23C8.13		chrI	630090
chrI	2773573	Y71F9B.10		chrI	2415503	F23C8.13		chrI	630093
chrI	2773602	Y71F9B.10		chrI	2415519	F23C8.13		chrI	630095
chrI	2773742	Y71F9B.10		chrI	2415524	F23C8.13		chrI	630101
chrI	2773749	Y71F9B.10		chrI	2415545	F23C8.13		chrI	630112
chrI	2773766	Y71F9B.10		chrI	2415555	F23C8.13		chrI	630113
chrI	2774359	Y71F9B.10		chrI	2415569	F23C8.13		chrI	630134
chrI	2774415	Y71F9B.10		chrI	2438250			chrI	630144
chrI	2774501	Y71F9B.10		chrI	2438251			chrI	630152
chrI	2774523	Y71F9B.10		chrI	2476948	Y74C10AR.3		chrI	630153
chrI	2774528	Y71F9B.10		chrI	2476958	Y74C10AR.3		chrI	630154
chrI	2774618	Y71F9B.10		chrI	2486203	Y74C10AR.1		chrI	630176
chrI	2774650	Y71F9B.10		chrI	2486744	Y74C10AR.1		chrI	630186
chrI	2774752	Y71F9B.10		chrI	2486745	Y74C10AR.1		chrI	630187
chrI	2774828	Y71F9B.10		chrI	2488808	Y74C10AR.1		chrI	630194
chrI	2774832	Y71F9B.10		chrI	2488812	Y74C10AR.1		chrI	630226
chrI	2774833	Y71F9B.10		chrI	2488888	Y74C10AR.1		chrI	630249
chrI	2787022	W03D8.10		chrI	2488898	Y74C10AR.1		chrI	630262
chrI	2799168	W03D8.2		chrI	2488911	Y74C10AR.1		chrI	630279
chrI	2809541	W03D8.6		chrI	2488921	Y74C10AR.1		chrI	630294
chrI	2811617	W03D8.6		chrI	2489055	Y74C10AR.1		chrI	630331
chrI	2848435	W10C8.1		chrI	2489072	Y74C10AR.1		chrI	630416
chrI	2857232			chrI	2489100	Y74C10AR.1		chrI	630426
chrI	2868476	Y71F9AL.10		chrI	2489101	Y74C10AR.1		chrI	630427
chrI	2868494	Y71F9AL.10		chrI	2489124	Y74C10AR.1		chrI	630436
chrI	2872823	Y71F9AL.12		chrI	2489125	Y74C10AR.1		chrI	630441
chrI	2872878	Y71F9AL.12		chrI	2491179	Y23H5B.6		chrI	630443
chrI	2873025	Y71F9AL.12		chrI	2491180	Y23H5B.6		chrI	630445
chrI	2873710	Y71F9AL.12		chrI	2491247	Y23H5B.6		chrI	630449
chrI	2873922	Y71F9AL.12		chrI	2491507	Y23H5B.6		chrI	630458
chrI	2873925	Y71F9AL.12		chrI	2491621	Y23H5B.6		chrI	630459
chrI	2883463			chrI	2491648	Y23H5B.6		chrI	630460
chrI	2902961	Y71F9AL.5		chrI	2491688	Y23H5B.6		chrI	630461
chrI	2911084	Y71F9AL.18		chrI	2494185	Y23H5B.6		chrI	630465
chrI	2911102	Y71F9AL.18		chrI	2585647	K07A3.1		chrI	630466
chrI	2920998	Y71F9AL.18		chrI	2715403	Y71F9B.5		chrI	630485
chrI	2925370	Y71F9AL.1		chrI	2715411	Y71F9B.5		chrI	630494
chrI	2926049	Y71F9AL.1		chrI	2715416	Y71F9B.5		chrI	630496
chrI	2927103	Y71F9AL.1		chrI	2715433	Y71F9B.5		chrI	630498
chrI	2927377	Y71F9AL.1		chrI	2715867	Y71F9B.5		chrI	630503
chrI	2927608	Y71F9AL.1		chrI	2716424	Y71F9B.5		chrI	630505
chrI	2930429	Y71F9AM.5		chrI	2716438	Y71F9B.5		chrI	630511
chrI	2930451	Y71F9AM.5		chrI	2716453	Y71F9B.5		chrI	630513
chrI	2930464	Y71F9AM.5		chrI	2716470	Y71F9B.5		chrI	630519
chrI	2930465	Y71F9AM.5		chrI	2716489	Y71F9B.5		chrI	630520
chrI	2930565	Y71F9AM.5		chrI	2716511	Y71F9B.5		chrI	630521
chrI	2930589	Y71F9AM.5		chrI	2716519	Y71F9B.5		chrI	630522
chrI	2930702	Y71F9AM.5		chrI	2716532	Y71F9B.5		chrI	630523
chrI	2930830	Y71F9AM.5		chrI	2717009	Y71F9B.5		chrI	630524
chrI	2930831	Y71F9AM.5		chrI	2717128	Y71F9B.5		chrI	630525
chrI	2930844	Y71F9AM.5		chrI	2721900			chrI	630526
chrI	2930857	Y71F9AM.5		chrI	2721903			chrI	630529
chrI	2930866	Y71F9AM.5		chrI	2721904			chrI	630531
chrI	2930963	Y71F9AM.5		chrI	2721905			chrI	630533
chrI	2930994	Y71F9AM.5		chrI	2721937			chrI	630534
chrI	2931085	Y71F9AM.5		chrI	2721942			chrI	630535
chrI	2931096	Y71F9AM.5		chrI	2721953			chrI	630537
chrI	2931102	Y71F9AM.5		chrI	2721965			chrI	630549
chrI	2931125	Y71F9AM.5		chrI	2721968			chrI	630551
chrI	2931126	Y71F9AM.5		chrI	2721973			chrI	630553
chrI	2942760	Y71F9AM.4		chrI	2721974			chrI	630567
chrI	2942763	Y71F9AM.4		chrI	2721975			chrI	630579
chrI	2942782	Y71F9AM.4		chrI	2721977			chrI	630588
chrI	2945961	Y71F9AM.4		chrI	2721991			chrI	630596
chrI	2988978	Y71F9AR.3		chrI	2722306			chrI	630597
chrI	2990034	Y71F9AR.3		chrI	2722315			chrI	630598
chrI	2990990	Y71F9AR.3		chrI	2722316			chrI	630599
chrI	2991148	Y71F9AR.3		chrI	2722344			chrI	630606
chrI	2991190	Y71F9AR.3		chrI	2722345			chrI	630610
chrI	3002002	Y54E10BL.5		chrI	2722346			chrI	630617
chrI	3002313	Y54E10BL.5		chrI	2722348			chrI	630620
chrI	3002314	Y54E10BL.5		chrI	2722349			chrI	630621
chrI	3002347	Y54E10BL.5		chrI	2722354			chrI	630626
chrI	3002348	Y54E10BL.5		chrI	2722355			chrI	630647
chrI	3002399	Y54E10BL.5		chrI	2722356			chrI	630648
chrI	3006387	Y54E10BL.6		chrI	2722359			chrI	630649
chrI	3006388	Y54E10BL.6		chrI	2722364			chrI	630654
chrI	3006479	Y54E10BL.6		chrI	2722369			chrI	630655
chrI	3006711	Y54E10BL.6		chrI	2722377			chrI	630657
chrI	3006717	Y54E10BL.6		chrI	2722378			chrI	630659
chrI	3006736	Y54E10BL.6		chrI	2722388			chrI	630671
chrI	3006739	Y54E10BL.6		chrI	2722398			chrI	630680
chrI	3007044	Y54E10BL.6		chrI	2722399			chrI	630681
chrI	3007057	Y54E10BL.6		chrI	2722408			chrI	630684
chrI	3007118	Y54E10BL.6		chrI	2722422			chrI	630685
chrI	3007131	Y54E10BL.6		chrI	2722431			chrI	630694
chrI	3007302	Y54E10BL.6		chrI	2722432			chrI	630695
chrI	3007424	Y54E10BL.6		chrI	2722503			chrI	630696
chrI	3007429	Y54E10BL.6		chrI	2722504			chrI	630697
chrI	3031880	Y54E10BR.6		chrI	2722511			chrI	630698
chrI	3034298	Y54E10BR.2		chrI	2728047			chrI	630739
chrI	3052316	Y54E10BR.8		chrI	2729179			chrI	630740
chrI	3053091	Y54E10BR.8		chrI	2729188			chrI	630771
chrI	3053093	Y54E10BR.8		chrI	2729197			chrI	630777
chrI	3053094	Y54E10BR.8		chrI	2729259			chrI	630780
chrI	3081801	M01B12.4		chrI	2729264			chrI	630781
chrI	3086227	M01B12.5		chrI	2729286			chrI	630782
chrI	3086421	M01B12.5		chrI	2729344			chrI	630784
chrI	3088382	M01B12.5		chrI	2729438			chrI	630785
chrI	3088418	M01B12.5		chrI	2729471			chrI	630799
chrI	3090244	M01B12.5		chrI	2729549			chrI	630800
chrI	3149028	K09H9.2		chrI	2729554			chrI	630811
chrI	3149682	K09H9.2		chrI	2733530	Y71F9B.2		chrI	630824
chrI	3149690	K09H9.2		chrI	2733539	Y71F9B.2		chrI	630825
chrI	3149695	K09H9.2		chrI	2733555	Y71F9B.2		chrI	630828
chrI	3166681	Y54E10A.6		chrI	2733556	Y71F9B.2		chrI	630834
chrI	3167639			chrI	2733578	Y71F9B.2		chrI	630837
chrI	3167661			chrI	2733579	Y71F9B.2		chrI	630838
chrI	3167764	Y54E10A.5		chrI	2733583	Y71F9B.2		chrI	630839
chrI	3167774	Y54E10A.5		chrI	2733600	Y71F9B.2		chrI	630840
chrI	3167787	Y54E10A.5		chrI	2733715	Y71F9B.2		chrI	630843
chrI	3167791	Y54E10A.5		chrI	2733927	Y71F9B.2		chrI	630844
chrI	3167798	Y54E10A.5		chrI	2733961	Y71F9B.2		chrI	630851
chrI	3167803	Y54E10A.5		chrI	2734005	Y71F9B.2		chrI	630852
chrI	3167808	Y54E10A.5		chrI	2734045	Y71F9B.2		chrI	630856
chrI	3167830	Y54E10A.5		chrI	2734052	Y71F9B.2		chrI	630859
chrI	3167850	Y54E10A.5		chrI	2734075	Y71F9B.2		chrI	630860
chrI	3171189	Y54E10A.5		chrI	2734076	Y71F9B.2		chrI	630870
chrI	3174049	Y54E10A.10		chrI	2734088	Y71F9B.2		chrI	630871
chrI	3174080	Y54E10A.10		chrI	2734105	Y71F9B.2		chrI	630872
chrI	3174081	Y54E10A.10		chrI	2734112	Y71F9B.2		chrI	630897
chrI	3174093	Y54E10A.10		chrI	2734323	Y71F9B.2		chrI	630899
chrI	3174125	Y54E10A.10		chrI	2734333	Y71F9B.2		chrI	630906
chrI	3174149	Y54E10A.10		chrI	2734334	Y71F9B.2		chrI	630912
chrI	3174263	Y54E10A.10		chrI	2734339	Y71F9B.2		chrI	630913
chrI	3174292	Y54E10A.10		chrI	2734361	Y71F9B.2		chrI	630917
chrI	3174316	Y54E10A.10		chrI	2734403	Y71F9B.2		chrI	630932
chrI	3174317	Y54E10A.10		chrI	2734413	Y71F9B.2		chrI	630935
chrI	3174335	Y54E10A.10		chrI	2734429	Y71F9B.2		chrI	630938
chrI	3174364	Y54E10A.10		chrI	2734436	Y71F9B.2		chrI	630939
chrI	3174385	Y54E10A.10		chrI	2734468	Y71F9B.2		chrI	630944
chrI	3174386	Y54E10A.10		chrI	2734506	Y71F9B.2		chrI	630957
chrI	3174409	Y54E10A.10		chrI	2734716	Y71F9B.2		chrI	630966
chrI	3174844	Y54E10A.10		chrI	2734719	Y71F9B.2		chrI	630995
chrI	3174862	Y54E10A.10		chrI	2734852	Y71F9B.2		chrI	630997
chrI	3174961	Y54E10A.10		chrI	2734865	Y71F9B.2		chrI	631000
chrI	3175543	Y54E10A.10		chrI	2734882	Y71F9B.2		chrI	631003
chrI	3175565	Y54E10A.10		chrI	2734886	Y71F9B.2		chrI	631007
chrI	3175566	Y54E10A.10		chrI	2734887	Y71F9B.2		chrI	631013
chrI	3175580	Y54E10A.10		chrI	2734909	Y71F9B.2		chrI	631014
chrI	3175592	Y54E10A.10		chrI	2734910	Y71F9B.2		chrI	631107	Y65B4A.6
chrI	3175593	Y54E10A.10		chrI	2773209	Y71F9B.10		chrI	633203	Y65B4A.6
chrI	3175603	Y54E10A.10		chrI	2773778	Y71F9B.10		chrI	633209	Y65B4A.6
chrI	3175639	Y54E10A.10		chrI	2774843	Y71F9B.10		chrI	633235	Y65B4A.6
chrI	3175814	Y54E10A.10		chrI	2869456			chrI	633236	Y65B4A.6
chrI	3175948	Y54E10A.10		chrI	2869520			chrI	633311	Y65B4A.6
chrI	3183060	Y54E10A.11		chrI	2869583			chrI	633324	Y65B4A.6
chrI	3191156	Y54E10A.11		chrI	2869589			chrI	633352	Y65B4A.6
chrI	3191175	Y54E10A.11		chrI	2869632			chrI	634451	Y65B4A.6
chrI	3195388	Y54E10A.12		chrI	2870298			chrI	636063	Y65B4A.6
chrI	3195407	Y54E10A.12		chrI	2870323			chrI	636086	Y65B4A.6
chrI	3196992	Y54E10A.12		chrI	2870324			chrI	639906	Y65B4A.2
chrI	3207008	Y54E10A.17		chrI	2870341			chrI	639908	Y65B4A.2
chrI	3207067	Y54E10A.17		chrI	2870345			chrI	639919	Y65B4A.2
chrI	3208614	Y54E10A.17		chrI	2870348			chrI	639941	Y65B4A.2
chrI	3211123	Y54E10A.4		chrI	2870351			chrI	639956	Y65B4A.2
chrI	3229936	Y54E10A.3		chrI	2870401			chrI	639978	Y65B4A.2
chrI	3230046	Y54E10A.3		chrI	2870406			chrI	639991	Y65B4A.2
chrI	3230129	Y54E10A.3		chrI	2870460			chrI	640003	Y65B4A.2
chrI	3230726	Y54E10A.3		chrI	2872824	Y71F9AL.12		chrI	640005	Y65B4A.2
chrI	3230743	Y54E10A.3		chrI	2873067	Y71F9AL.12		chrI	640047	Y65B4A.2
chrI	3230789	Y54E10A.3		chrI	2889863	Y71F9AL.16		chrI	640053	Y65B4A.2
chrI	3230804	Y54E10A.3		chrI	2889864	Y71F9AL.16		chrI	640054	Y65B4A.2
chrI	3231284	Y54E10A.3		chrI	2889865	Y71F9AL.16		chrI	642631	Y65B4A.2
chrI	3231297	Y54E10A.3		chrI	2889993	Y71F9AL.16		chrI	642746	Y65B4A.2
chrI	3231304	Y54E10A.3		chrI	2890104	Y71F9AL.16		chrI	643542	Y65B4A.2
chrI	3231307	Y54E10A.3		chrI	2890129	Y71F9AL.16		chrI	643549	Y65B4A.2
chrI	3231314	Y54E10A.3		chrI	2890130	Y71F9AL.16		chrI	643569	Y65B4A.2
chrI	3231446	Y54E10A.3		chrI	2890131	Y71F9AL.16		chrI	643580	Y65B4A.2
chrI	3231455	Y54E10A.3		chrI	2890132	Y71F9AL.16		chrI	652159	Y65B4A.2
chrI	3231460	Y54E10A.3		chrI	2926006	Y71F9AL.1		chrI	652320	Y65B4A.2
chrI	3231461	Y54E10A.3		chrI	2926007	Y71F9AL.1		chrI	652693	Y65B4A.2
chrI	3231466	Y54E10A.3		chrI	2926024	Y71F9AL.1		chrI	652699	Y65B4A.2
chrI	3231472	Y54E10A.3		chrI	2926116	Y71F9AL.1		chrI	652717	Y65B4A.2
chrI	3231473	Y54E10A.3		chrI	2926199	Y71F9AL.1		chrI	652850	Y65B4A.2
chrI	3272658	W01B11.5		chrI	2926206	Y71F9AL.1		chrI	653072	Y65B4A.2
chrI	3276120	W01B11.5		chrI	2926233	Y71F9AL.1		chrI	653085	Y65B4A.2
chrI	3324582	Y44E3A.4		chrI	2926246	Y71F9AL.1		chrI	654920	Y65B4A.1
chrI	3329212	Y44E3A.4		chrI	2926255	Y71F9AL.1		chrI	655212	Y65B4A.1
chrI	3329254	Y44E3A.4		chrI	2926273	Y71F9AL.1		chrI	655247	Y65B4A.1
chrI	3338021			chrI	2926274	Y71F9AL.1		chrI	655261	Y65B4A.1
chrI	3362409	W05F2.8		chrI	2927308	Y71F9AL.1		chrI	655384	Y65B4A.1
chrI	3410831	K03E5.3		chrI	2930530	Y71F9AM.5		chrI	655385	Y65B4A.1
chrI	3410837	K03E5.3		chrI	2930542	Y71F9AM.5		chrI	655463	Y65B4A.1
chrI	3410842	K03E5.3		chrI	2930566	Y71F9AM.5		chrI	655464	Y65B4A.1
chrI	3410865	K03E5.3		chrI	2930572	Y71F9AM.5		chrI	655466	Y65B4A.1
chrI	3410866	K03E5.3		chrI	2930579	Y71F9AM.5		chrI	655476	Y65B4A.1
chrI	3410912	K03E5.3		chrI	2930645	Y71F9AM.5		chrI	655481	Y65B4A.1
chrI	3410985	K03E5.3		chrI	2930646	Y71F9AM.5		chrI	656012	Y65B4A.1
chrI	3411108	K03E5.3		chrI	2930651	Y71F9AM.5		chrI	656458	Y65B4A.1
chrI	3411110	K03E5.3		chrI	2930673	Y71F9AM.5		chrI	656495	Y65B4A.1
chrI	3411187	K03E5.3		chrI	2930695	Y71F9AM.5		chrI	656497	Y65B4A.1
chrI	3411206	K03E5.3		chrI	2930712	Y71F9AM.5		chrI	656498	Y65B4A.1
chrI	3411269	K03E5.3		chrI	2930736	Y71F9AM.5		chrI	659739	Y65B4A.8
chrI	3411313	K03E5.3		chrI	2930809	Y71F9AM.5		chrI	659740	Y65B4A.8
chrI	3414097	K03E5.3		chrI	2930810	Y71F9AM.5		chrI	659743	Y65B4A.8
chrI	3449448	Y47G6A.11		chrI	2930858	Y71F9AM.5		chrI	659747	Y65B4A.8
chrI	3477652	Y47G6A.10		chrI	2930871	Y71F9AM.5		chrI	659750	Y65B4A.8
chrI	3490073	Y47G6A.17		chrI	2930888	Y71F9AM.5		chrI	659751	Y65B4A.8
chrI	3491226	Y47G6A.17		chrI	2930893	Y71F9AM.5		chrI	659760	Y65B4A.8
chrI	3507588	Y47G6A.7		chrI	2930899	Y71F9AM.5		chrI	659761	Y65B4A.8
chrI	3507589	Y47G6A.7		chrI	2930988	Y71F9AM.5		chrI	659765	Y65B4A.8
chrI	3507824	Y47G6A.7		chrI	2930991	Y71F9AM.5		chrI	659772	Y65B4A.8
chrI	3535263	Y47G6A.5		chrI	2930997	Y71F9AM.5		chrI	659773	Y65B4A.8
chrI	3544841	Y47G6A.20		chrI	2930998	Y71F9AM.5		chrI	659777	Y65B4A.8
chrI	3544842	Y47G6A.20		chrI	2931021	Y71F9AM.5		chrI	659781	Y65B4A.8
chrI	3557753	Y47G6A.21		chrI	2931045	Y71F9AM.5		chrI	659784	Y65B4A.8
chrI	3559815			chrI	2931082	Y71F9AM.5		chrI	659786	Y65B4A.8
chrI	3563660			chrI	2931087	Y71F9AM.5		chrI	659794	Y65B4A.8
chrI	3563661			chrI	2989891	Y71F9AR.3		chrI	659795	Y65B4A.8
chrI	3565389	Y47G6A.23		chrI	2989905	Y71F9AR.3		chrI	659799	Y65B4A.8
chrI	3565872	Y47G6A.23		chrI	2989924	Y71F9AR.3		chrI	659803	Y65B4A.8
chrI	3568683	Y47G6A.23		chrI	3002022	Y54E10BL.5		chrI	659804	Y65B4A.8
chrI	3586149	Y47G6A.29		chrI	3006308	Y54E10BL.6		chrI	659805	Y65B4A.8
chrI	3586170	Y47G6A.29		chrI	3006312	Y54E10BL.6		chrI	659856	Y65B4A.8
chrI	3598071	Y47G6A.29		chrI	3006316	Y54E10BL.6		chrI	659857	Y65B4A.8
chrI	3598095	Y47G6A.29		chrI	3006332	Y54E10BL.6		chrI	659862	Y65B4A.8
chrI	3598371	Y47G6A.29		chrI	3006407	Y54E10BL.6		chrI	659866	Y65B4A.8
chrI	3599530	Y47G6A.29		chrI	3006694	Y54E10BL.6		chrI	659867	Y65B4A.8
chrI	3609579	Y47G6A.2		chrI	3006698	Y54E10BL.6		chrI	659870	Y65B4A.8
chrI	3681284			chrI	3006699	Y54E10BL.6		chrI	659874	Y65B4A.8
chrI	3681294			chrI	3006701	Y54E10BL.6		chrI	659875	Y65B4A.8
chrI	3682593			chrI	3007126	Y54E10BL.6		chrI	659880	Y65B4A.8
chrI	3685304	D1037.1		chrI	3007174	Y54E10BL.6		chrI	659885	Y65B4A.8
chrI	3690146	D1037.1		chrI	3007199	Y54E10BL.6		chrI	659886	Y65B4A.8
chrI	3704561			chrI	3007260	Y54E10BL.6		chrI	659887	Y65B4A.8
chrI	3708119	F21A9.2		chrI	3007312	Y54E10BL.6		chrI	659888	Y65B4A.8
chrI	3733813	T12F5.5		chrI	3007355	Y54E10BL.6		chrI	659889	Y65B4A.8
chrI	3733903	T12F5.5		chrI	3007459	Y54E10BL.6		chrI	659896	Y65B4A.8
chrI	3734006	T12F5.5		chrI	3020522	Y54E10BR.4		chrI	659900	Y65B4A.8
chrI	3734020	T12F5.5		chrI	3020926	Y54E10BR.4		chrI	659901	Y65B4A.8
chrI	3734032	T12F5.5		chrI	3020927	Y54E10BR.4		chrI	659904	Y65B4A.8
chrI	3734033	T12F5.5		chrI	3021070	Y54E10BR.4		chrI	659905	Y65B4A.8
chrI	3734147	T12F5.5		chrI	3021095	Y54E10BR.4		chrI	659910	Y65B4A.8
chrI	3737001	T12F5.5		chrI	3027283	Y54E10BR.3		chrI	659911	Y65B4A.8
chrI	3737105	T12F5.5		chrI	3033929	Y54E10BR.2		chrI	659914	Y65B4A.8
chrI	3794641	C32E8.9		chrI	3033936	Y54E10BR.2		chrI	659917	Y65B4A.8
chrI	3795517	C32E8.9		chrI	3033943	Y54E10BR.2		chrI	659918	Y65B4A.8
chrI	3801083	C32E8.10		chrI	3033967	Y54E10BR.2		chrI	659920	Y65B4A.8
chrI	3812719	C32E8.11		chrI	3033981	Y54E10BR.2		chrI	659921	Y65B4A.8
chrI	3828242			chrI	3033987	Y54E10BR.2		chrI	659922	Y65B4A.8
chrI	3861196	T03F1.8		chrI	3033988	Y54E10BR.2		chrI	659934	Y65B4A.8
chrI	3917861			chrI	3034056	Y54E10BR.2		chrI	659937	Y65B4A.8
chrI	3946532	T21E3.3		chrI	3034139	Y54E10BR.2		chrI	660153	Y65B4A.8
chrI	4062457	C09D1.1		chrI	3034168	Y54E10BR.2		chrI	660198	Y65B4A.8
chrI	4136639	E01A2.5		chrI	3034173	Y54E10BR.2		chrI	660416	Y65B4A.8
chrI	4147529	E01A2.8		chrI	3034182	Y54E10BR.2		chrI	660433	Y65B4A.8
chrI	4150635	R12E2.14		chrI	3034191	Y54E10BR.2		chrI	660451	Y65B4A.8
chrI	4199974	C18E3.5		chrI	3034208	Y54E10BR.2		chrI	660452	Y65B4A.8
chrI	4207582	C18E3.3		chrI	3034209	Y54E10BR.2		chrI	661347	Y65B4A.8
chrI	4207906	C18E3.3		chrI	3034225	Y54E10BR.2		chrI	661353	Y65B4A.8
chrI	4209296	C18E3.8		chrI	3034232	Y54E10BR.2		chrI	661429	Y65B4A.8
chrI	4249405			chrI	3034240	Y54E10BR.2		chrI	661493	Y65B4A.8
chrI	4305336	Y47D9A.1		chrI	3034241	Y54E10BR.2		chrI	662129	Y65B4A.8
chrI	4338713	ZK973.6		chrI	3034291	Y54E10BR.2		chrI	662130	Y65B4A.8
chrI	4372260	ZK973.10		chrI	3034297	Y54E10BR.2		chrI	662145	Y65B4A.8
chrI	4384870	ZK973.1		chrI	3034299	Y54E10BR.2		chrI	662146	Y65B4A.8
chrI	4449868	C41D11.5		chrI	3034305	Y54E10BR.2		chrI	662151	Y65B4A.8
chrI	4456790	C41D11.7		chrI	3034306	Y54E10BR.2		chrI	662162	Y65B4A.8
chrI	4459623	C41D11.1		chrI	3034339	Y54E10BR.2		chrI	662163	Y65B4A.8
chrI	4515079	Y119C1B.5		chrI	3034343	Y54E10BR.2		chrI	662181	Y65B4A.8
chrI	4528059	Y119C1B.8		chrI	3034352	Y54E10BR.2		chrI	662191	Y65B4A.8
chrI	4539618	Y119C1B.9		chrI	3034356	Y54E10BR.2		chrI	662192	Y65B4A.8
chrI	4604194	D1007.16		chrI	3034363	Y54E10BR.2		chrI	662193	Y65B4A.8
chrI	4641775	Y119C1A.1		chrI	3034369	Y54E10BR.2		chrI	662194	Y65B4A.8
chrI	4643576	Y119C1A.1		chrI	3034384	Y54E10BR.2		chrI	662200	Y65B4A.8
chrI	4671669	B0041.7		chrI	3034385	Y54E10BR.2		chrI	662221	Y65B4A.8
chrI	4703755			chrI	3034390	Y54E10BR.2		chrI	662232	Y65B4A.8
chrI	4703948			chrI	3034468	Y54E10BR.2		chrI	662233	Y65B4A.8
chrI	4731772	C10H11.3		chrI	3034492	Y54E10BR.2		chrI	662234	Y65B4A.8
chrI	4734227	C10H11.3		chrI	3034494	Y54E10BR.2		chrI	662235	Y65B4A.8
chrI	4734238	C10H11.3		chrI	3034521	Y54E10BR.2		chrI	662237	Y65B4A.8
chrI	4734250	C10H11.3		chrI	3034528	Y54E10BR.2		chrI	662244	Y65B4A.8
chrI	4734255	C10H11.3		chrI	3034529	Y54E10BR.2		chrI	662249	Y65B4A.8
chrI	4734259	C10H11.3		chrI	3034548	Y54E10BR.2		chrI	662250	Y65B4A.8
chrI	4735284			chrI	3034549	Y54E10BR.2		chrI	662259	Y65B4A.8
chrI	4738118			chrI	3034550	Y54E10BR.2		chrI	662260	Y65B4A.8
chrI	4765788	M04F3.2		chrI	3034553	Y54E10BR.2		chrI	662267	Y65B4A.8
chrI	4767531	M04F3.2		chrI	3034558	Y54E10BR.2		chrI	662268	Y65B4A.8
chrI	4791716	F54D7.4		chrI	3034559	Y54E10BR.2		chrI	663374	Y65B4A.8
chrI	4791717	F54D7.4		chrI	3034570	Y54E10BR.2		chrI	663380	Y65B4A.8
chrI	4824984	F57C9.7		chrI	3034571	Y54E10BR.2		chrI	677015
chrI	4833298	F57C9.4		chrI	3034607	Y54E10BR.2		chrI	677018
chrI	4958892			chrI	3073151	M01B12.4		chrI	677019
chrI	4978984			chrI	3073228	M01B12.4		chrI	677020
chrI	4978985			chrI	3073231	M01B12.4		chrI	677021
chrI	5002518			chrI	3073249	M01B12.4		chrI	677025
chrI	5007042	F54C1.9		chrI	3073872	M01B12.4		chrI	677032
chrI	5097835	C30F8.3		chrI	3073873	M01B12.4		chrI	677040
chrI	5097843	C30F8.3		chrI	3086374	M01B12.5		chrI	677041
chrI	5110352	Y110A7A.21		chrI	3086375	M01B12.5		chrI	677047
chrI	5111640	Y110A7A.15		chrI	3090283	M01B12.5		chrI	677307
chrI	5132894	Y110A7A.6		chrI	3149072	K09H9.2		chrI	677311
chrI	5132924	Y110A7A.6		chrI	3149736	K09H9.2		chrI	677312
chrI	5143298	Y110A7A.3		chrI	3167505	Y54E10A.6		chrI	677316
chrI	5149512			chrI	3167510	Y54E10A.6		chrI	677321
chrI	5149583			chrI	3167523	Y54E10A.6		chrI	677322
chrI	5149596			chrI	3167527	Y54E10A.6		chrI	677329
chrI	5149643			chrI	3167530	Y54E10A.6		chrI	677331
chrI	5149644			chrI	3167534	Y54E10A.6		chrI	677332
chrI	5149722			chrI	3167558			chrI	677344
chrI	5149730			chrI	3167559			chrI	677345
chrI	5149731			chrI	3167578			chrI	677351
chrI	5149740			chrI	3167581			chrI	677352
chrI	5149750			chrI	3167582			chrI	677353
chrI	5149768			chrI	3167598			chrI	677354
chrI	5149778			chrI	3167600			chrI	677358
chrI	5149822			chrI	3167604			chrI	677359
chrI	5149832			chrI	3167606			chrI	677360
chrI	5149835			chrI	3167609			chrI	677361
chrI	5149836			chrI	3167613			chrI	677368
chrI	5185371	F56A3.2		chrI	3167614			chrI	677375
chrI	5186232	F56A3.2		chrI	3167618			chrI	677389
chrI	5193137	F56A3.1		chrI	3167620			chrI	677395
chrI	5240896	C32E12.4		chrI	3167621			chrI	677396
chrI	5252947	B0261.2		chrI	3167625			chrI	677407
chrI	5269551	B0261.7		chrI	3167638			chrI	677413
chrI	5275148	C01G8.2		chrI	3167648			chrI	677419
chrI	5317810	F48C1.5		chrI	3167651			chrI	677867
chrI	5329094	F48C1.1		chrI	3167664			chrI	677876
chrI	5336834	F48C1.8		chrI	3167751	Y54E10A.5		chrI	677882
chrI	5336846	F48C1.8		chrI	3167753	Y54E10A.5		chrI	677897
chrI	5342188	F55A12.7		chrI	3167763	Y54E10A.5		chrI	677911
chrI	5347586	F55A12.5		chrI	3167773	Y54E10A.5		chrI	677925
chrI	5349177	F55A12.5		chrI	3167775	Y54E10A.5		chrI	677926
chrI	5366017	F55A12.2		chrI	3167778	Y54E10A.5		chrI	677929
chrI	5367151	F55A12.10		chrI	3167779	Y54E10A.5		chrI	677971
chrI	5369171	F55A12.1		chrI	3167788	Y54E10A.5		chrI	677986
chrI	5369804	F55A12.1		chrI	3167794	Y54E10A.5		chrI	678006
chrI	5404983	C24A11.8		chrI	3167799	Y54E10A.5		chrI	678055
chrI	5501618	C09D4.1		chrI	3167800	Y54E10A.5		chrI	678062
chrI	5529720	F59A3.1		chrI	3167806	Y54E10A.5		chrI	678067
chrI	5529760	F59A3.1		chrI	3167812	Y54E10A.5		chrI	678076
chrI	5560380	M01A10.2		chrI	3167814	Y54E10A.5		chrI	678099
chrI	5576317	M01E11.3		chrI	3167824	Y54E10A.5		chrI	678100
chrI	5621005	F46F11.7		chrI	3167831	Y54E10A.5		chrI	678106
chrI	5662734	F55F8.1		chrI	3167834	Y54E10A.5		chrI	678136
chrI	5685500	T19B4.7		chrI	3167844	Y54E10A.5		chrI	678137
chrI	5703582	T19B4.1		chrI	3167845	Y54E10A.5		chrI	678141
chrI	5749242	F56H1.1		chrI	3167846	Y54E10A.5		chrI	678448
chrI	5753727	F56H1.1		chrI	3167852	Y54E10A.5		chrI	678454
chrI	5760399	F56H1.5		chrI	3167861	Y54E10A.5		chrI	678455
chrI	5789678	B0414.5		chrI	3167862	Y54E10A.5		chrI	678463
chrI	5790430	B0414.5		chrI	3167863	Y54E10A.5		chrI	678470
chrI	5795919	B0414.7		chrI	3167901	Y54E10A.5		chrI	678528
chrI	5913486	C34G6.1		chrI	3173992	Y54E10A.10		chrI	678529
chrI	5913717	C34G6.1		chrI	3174365	Y54E10A.10		chrI	678530
chrI	5913727	C34G6.1		chrI	3174410	Y54E10A.10		chrI	678532
chrI	5914331	C34G6.1		chrI	3174417	Y54E10A.10		chrI	678535
chrI	5914342	C34G6.1		chrI	3174444	Y54E10A.10		chrI	678536
chrI	5914440	C34G6.1		chrI	3174447	Y54E10A.10		chrI	678543
chrI	5914450	C34G6.1		chrI	3175791	Y54E10A.10		chrI	678550
chrI	5945525	B0207.3		chrI	3175792	Y54E10A.10		chrI	678553
chrI	5945662			chrI	3175887	Y54E10A.10		chrI	678554
chrI	5959086	B0207.10		chrI	3175893	Y54E10A.10		chrI	678556
chrI	5976997			chrI	3175949	Y54E10A.10		chrI	678559
chrI	5977515			chrI	3175980	Y54E10A.10		chrI	678561
chrI	5979478	C06A5.6		chrI	3229822	Y54E10A.3		chrI	678563
chrI	5979485	C06A5.6		chrI	3229825	Y54E10A.3		chrI	678567
chrI	5982471	C06A5.6		chrI	3229879	Y54E10A.3		chrI	678572
chrI	5982478	C06A5.6		chrI	3229880	Y54E10A.3		chrI	678578
chrI	5983070	C06A5.6		chrI	3230109	Y54E10A.3		chrI	678579
chrI	5983087	C06A5.6		chrI	3230117	Y54E10A.3		chrI	678587
chrI	5983100	C06A5.6		chrI	3230140	Y54E10A.3		chrI	678595
chrI	5983101	C06A5.6		chrI	3230167	Y54E10A.3		chrI	678597
chrI	5988205	C06A5.3		chrI	3230174	Y54E10A.3		chrI	678664
chrI	6019536	C06A5.1		chrI	3230191	Y54E10A.3		chrI	678710
chrI	6036717	C27A12.4		chrI	3230193	Y54E10A.3		chrI	678716
chrI	6045391	C27A12.2		chrI	3230194	Y54E10A.3		chrI	678717
chrI	6063539	C27A12.9		chrI	3230217	Y54E10A.3		chrI	678723
chrI	6096396	ZK484.7		chrI	3230225	Y54E10A.3		chrI	678742
chrI	6106410	T27A3.6		chrI	3230834	Y54E10A.3		chrI	678750
chrI	6147905			chrI	3230916	Y54E10A.3		chrI	678761
chrI	6158414	T09B4.6		chrI	3230917	Y54E10A.3		chrI	678762
chrI	6158415	T09B4.6		chrI	3230932	Y54E10A.3		chrI	678763
chrI	6159938			chrI	3230971	Y54E10A.3		chrI	678765
chrI	6180102	T09B4.9		chrI	3231043	Y54E10A.3		chrI	678768
chrI	6182680	T09B4.10		chrI	3231288	Y54E10A.3		chrI	678770
chrI	6185078	T09B4.2		chrI	3231301	Y54E10A.3		chrI	678773
chrI	6189948	T05E7.3		chrI	3231547	Y54E10A.3		chrI	678776
chrI	6189958	T05E7.3		chrI	3255877			chrI	678780
chrI	6212992	T08B2.9		chrI	3275844	W01B11.5		chrI	678788
chrI	6213004	T08B2.9		chrI	3275889	W01B11.5		chrI	678806
chrI	6222893	T08B2.11		chrI	3345135	Y44E3A.6		chrI	678809
chrI	6290516	C10G11.6		chrI	3410944	K03E5.3		chrI	678812
chrI	6294313			chrI	3411014	K03E5.3		chrI	678916
chrI	6305581	C10G11.10		chrI	3411109	K03E5.3		chrI	678995
chrI	6311731	F26B1.4		chrI	3411162	K03E5.3		chrI	679007
chrI	6349591	K04F10.4		chrI	3411323	K03E5.3		chrI	679010
chrI	6349593	K04F10.4		chrI	3411326	K03E5.3		chrI	679013
chrI	6386199	ZC328.2		chrI	3411812	K03E5.3		chrI	679016
chrI	6454164	T23H2.4		chrI	3506752	Y47G6A.7		chrI	679017
chrI	6457067	T23H2.5		chrI	3506753	Y47G6A.7		chrI	679018
chrI	6473609	K06A5.1		chrI	3506769	Y47G6A.7		chrI	679024
chrI	6502985	C55B7.10		chrI	3506770	Y47G6A.7		chrI	679031
chrI	6514545	C55B7.1		chrI	3506781	Y47G6A.7		chrI	679039
chrI	6526375	T10E9.4		chrI	3506897	Y47G6A.7		chrI	679047
chrI	6543980	T10E9.2		chrI	3506900	Y47G6A.7		chrI	679052
chrI	6564824	F57B10.12		chrI	3506927	Y47G6A.7		chrI	679053
chrI	6570222	F57B10.3		chrI	3507719	Y47G6A.7		chrI	679061
chrI	6596386			chrI	3507732	Y47G6A.7		chrI	679062
chrI	6660906	ZC581.7		chrI	3507733	Y47G6A.7		chrI	679064
chrI	6666860	ZC581.9		chrI	3515182			chrI	679065
chrI	6728702	W02D3.5		chrI	3515333			chrI	679069
chrI	6742804	W02D3.9		chrI	3552266	Y47G6A.21		chrI	679076
chrI	6762666	F08B6.4		chrI	3560378	Y47G6A.22		chrI	679084
chrI	6781328	C37A2.4		chrI	3560543	Y47G6A.22		chrI	679092
chrI	6796863	C37A2.2		chrI	3681368			chrI	679098
chrI	6813261	K02F2.4		chrI	3682617			chrI	679103
chrI	6878382	T21G5.5		chrI	3689222	D1037.1		chrI	679106
chrI	6900952	C48B6.6		chrI	3704562			chrI	679107
chrI	6904188	C48B6.6		chrI	3733808	T12F5.5		chrI	679114
chrI	6905774	C48B6.6		chrI	3733812	T12F5.5		chrI	679121
chrI	6913376	C48B6.6		chrI	3734294	T12F5.5		chrI	679129
chrI	6949491	T10B11.7		chrI	3800518	C32E8.10		chrI	679141
chrI	6955345	C30F12.1		chrI	3861041	T03F1.8		chrI	679147
chrI	6968273	C30F12.2		chrI	3861047	T03F1.8		chrI	679156
chrI	6977013	C30F12.7		chrI	3888890	C50F2.4		chrI	679157
chrI	6989430	C30F12.6		chrI	3927597	T20F5.7		chrI	679160
chrI	7003969			chrI	4079315	C09D1.1		chrI	679161
chrI	7003983			chrI	4135514	E01A2.5		chrI	679167
chrI	7004301			chrI	4135527	E01A2.5		chrI	679169
chrI	7004303			chrI	4305192	Y47D9A.1		chrI	679170
chrI	7004304			chrI	4305335	Y47D9A.1		chrI	679250
chrI	7004312			chrI	4611094	C44E4.1		chrI	679251
chrI	7004327			chrI	4641757	Y119C1A.1		chrI	679264
chrI	7004328			chrI	4650138	B0041.5		chrI	679279
chrI	7004335			chrI	4703744			chrI	679285
chrI	7004336			chrI	4703748			chrI	679303
chrI	7004341			chrI	4791748	F54D7.4		chrI	679315
chrI	7004356			chrI	4791982	F54D7.4		chrI	679319
chrI	7004359			chrI	4791984	F54D7.4		chrI	679320
chrI	7004681			chrI	4833078	F57C9.4		chrI	679321
chrI	7004737			chrI	5097787	C30F8.3		chrI	679332
chrI	7004813			chrI	5149492			chrI	679334
chrI	7004893			chrI	5149504			chrI	679359
chrI	7004896			chrI	5149506			chrI	679403
chrI	7004916			chrI	5149546			chrI	679404
chrI	7004924			chrI	5149547			chrI	679424
chrI	7004925			chrI	5149552			chrI	679727
chrI	7004949			chrI	5149560			chrI	679740
chrI	7004951			chrI	5149567			chrI	682009	Y18H1A.11
chrI	7004956			chrI	5149570			chrI	682019	Y18H1A.11
chrI	7005021			chrI	5149580			chrI	682027	Y18H1A.11
chrI	7070982	W01A8.6		chrI	5149611			chrI	682032	Y18H1A.11
chrI	7072458	W01A8.6		chrI	5149616			chrI	682040	Y18H1A.11
chrI	7088030	F22D6.3		chrI	5149623			chrI	682048	Y18H1A.11
chrI	7098426			chrI	5149624			chrI	682053	Y18H1A.11
chrI	7098454			chrI	5149625			chrI	682063	Y18H1A.11
chrI	7099569	F22D6.8		chrI	5149634			chrI	682065	Y18H1A.11
chrI	7160429	K07G5.2		chrI	5149652			chrI	682066	Y18H1A.11
chrI	7160910	K07G5.2		chrI	5149662			chrI	682070	Y18H1A.11
chrI	7208224	C01H6.3		chrI	5149671			chrI	682086	Y18H1A.11
chrI	7212469	C01H6.4		chrI	5149672			chrI	682095	Y18H1A.11
chrI	7223341	C01H6.6		chrI	5149732			chrI	682096	Y18H1A.11
chrI	7248836	R06C7.7		chrI	5149754			chrI	682098	Y18H1A.11
chrI	7293924			chrI	5149758			chrI	692301	Y18H1A.4
chrI	7350393	F07A5.1		chrI	5149759			chrI	695297	Y18H1A.2
chrI	7356764	F07A5.3		chrI	5149760			chrI	695688	Y18H1A.2
chrI	7367492	F07A5.5		chrI	5149765			chrI	695695	Y18H1A.2
chrI	7459639	ZK524.3		chrI	5149781			chrI	696276	Y18H1A.2
chrI	7483292	T28F4.2		chrI	5149787			chrI	696277	Y18H1A.2
chrI	7502591	C26C6.1		chrI	5149788			chrI	696278	Y18H1A.2
chrI	7528935	C26C6.3		chrI	5149805			chrI	696290	Y18H1A.2
chrI	7529808	C26C6.3		chrI	5149806			chrI	696325	Y18H1A.2
chrI	7555099	T25G3.2		chrI	5149816			chrI	696340	Y18H1A.2
chrI	7559530	T25G3.2		chrI	5149817			chrI	696352	Y18H1A.2
chrI	7567127	T25G3.4		chrI	5149819			chrI	701982	Y18H1A.3
chrI	7579020	D2030.3		chrI	5149846			chrI	701992	Y18H1A.3
chrI	7581633			chrI	5149847			chrI	701995	Y18H1A.3
chrI	7586411	D2030.6		chrI	5149882			chrI	701996	Y18H1A.3
chrI	7586455	D2030.6		chrI	5149884			chrI	702007	Y18H1A.3
chrI	7640346	F26A3.1		chrI	5368874	F55A12.1		chrI	702012	Y18H1A.3
chrI	7678473	T24B1.1		chrI	5369489	F55A12.1		chrI	702017	Y18H1A.3
chrI	7696835	T23G11.3		chrI	5369506	F55A12.1		chrI	702036	Y18H1A.3
chrI	7701396	T23G11.1		chrI	5369507	F55A12.1		chrI	702037	Y18H1A.3
chrI	7703448	F27D4.1		chrI	5369521	F55A12.1		chrI	702038	Y18H1A.3
chrI	7703490	F27D4.1		chrI	5369538	F55A12.1		chrI	702039	Y18H1A.3
chrI	7728177	F27D4.5		chrI	5369539	F55A12.1		chrI	702040	Y18H1A.3
chrI	7728659	F27D4.5		chrI	5369549	F55A12.1		chrI	702043	Y18H1A.3
chrI	7756415			chrI	5369550	F55A12.1		chrI	702047	Y18H1A.3
chrI	7780399			chrI	5978836	C06A5.6		chrI	702053	Y18H1A.3
chrI	7780502			chrI	5978837	C06A5.6		chrI	702098	Y18H1A.3
chrI	7800488	D2005.2		chrI	5978850	C06A5.6		chrI	702111	Y18H1A.3
chrI	7868799	R11A5.4		chrI	5978867	C06A5.6		chrI	702114	Y18H1A.3
chrI	7868830	R11A5.4		chrI	5980148	C06A5.6		chrI	702115	Y18H1A.3
chrI	7920084	F20G4.1		chrI	5980157	C06A5.6		chrI	702116	Y18H1A.3
chrI	7920093	F20G4.1		chrI	6228783	T08B2.3		chrI	702117	Y18H1A.3
chrI	7941978	T22C1.5		chrI	6228804	T08B2.3		chrI	702132	Y18H1A.3
chrI	7970159	T22C1.10		chrI	6228805	T08B2.3		chrI	702136	Y18H1A.3
chrI	7985446	H05L14.2		chrI	6229148	T08B2.3		chrI	702137	Y18H1A.3
chrI	7985632	H05L14.2		chrI	6229155	T08B2.3		chrI	702767	Y18H1A.3
chrI	7996577	C54G4.5		chrI	6229180	T08B2.3		chrI	704079	Y18H1A.3
chrI	8063019	F18C12.1		chrI	6229211	T08B2.3		chrI	705547	Y18H1A.3
chrI	8186735			chrI	6229223	T08B2.3		chrI	705549	Y18H1A.3
chrI	8207109	F08A10.1		chrI	6229257	T08B2.3		chrI	705550	Y18H1A.3
chrI	8211655	T02E1.6		chrI	6229300	T08B2.3		chrI	705557	Y18H1A.3
chrI	8212275	T02E1.6		chrI	6229321	T08B2.3		chrI	705573	Y18H1A.3
chrI	8268901	ZK265.7		chrI	6229322	T08B2.3		chrI	705613	Y18H1A.3
chrI	8332732			chrI	6229345	T08B2.3		chrI	705616	Y18H1A.3
chrI	8384953	T19A6.1		chrI	6229375	T08B2.3		chrI	705635	Y18H1A.3
chrI	8401953	T19A6.4		chrI	6229409	T08B2.3		chrI	705649	Y18H1A.3
chrI	8402015	T19A6.4		chrI	6229410	T08B2.3		chrI	705650	Y18H1A.3
chrI	8413357	F02E9.7		chrI	6229436	T08B2.3		chrI	705653	Y18H1A.3
chrI	8440117	F10D11.3		chrI	6349601	K04F10.4		chrI	705679	Y18H1A.3
chrI	8487926	D1081.7		chrI	6355566	K04F10.4		chrI	705680	Y18H1A.3
chrI	8517372	K02B12.4		chrI	6473389	K06A5.1		chrI	705681	Y18H1A.3
chrI	8532065	M04C7.1		chrI	6473395	K06A5.1		chrI	707844	Y18H1A.3
chrI	8571790	T01H8.2		chrI	6473399	K06A5.1		chrI	708134	Y18H1A.3
chrI	8576267	T01H8.1		chrI	6473402	K06A5.1		chrI	708153	Y18H1A.3
chrI	8596548	R05D11.6		chrI	6473421	K06A5.1		chrI	710734	Y18H1A.3
chrI	8606155	F43G9.13		chrI	6473423	K06A5.1		chrI	710735	Y18H1A.3
chrI	8623261	F43G9.6		chrI	6473435	K06A5.1		chrI	710740	Y18H1A.3
chrI	8625354	F43G9.6		chrI	6473461	K06A5.1		chrI	710749	Y18H1A.3
chrI	8650802	F39H2.2		chrI	6473462	K06A5.1		chrI	710821	Y18H1A.3
chrI	8651653	F39H2.2		chrI	6473472	K06A5.1		chrI	710865	Y18H1A.3
chrI	8670881	K07A12.8		chrI	6473481	K06A5.1		chrI	710874	Y18H1A.3
chrI	8699224	F39H11.2		chrI	6473482	K06A5.1		chrI	710875	Y18H1A.3
chrI	8699410	F39H11.2		chrI	6473489	K06A5.1		chrI	710876	Y18H1A.3
chrI	8710309	C36B1.1		chrI	6473492	K06A5.1		chrI	714151	Y18H1A.3
chrI	8733399	C36B1.6		chrI	6473517	K06A5.1		chrI	714167	Y18H1A.3
chrI	8775182	DY3.5		chrI	6473539	K06A5.1		chrI	714181	Y18H1A.3
chrI	8776698	DY3.5		chrI	6473548	K06A5.1		chrI	714225	Y18H1A.3
chrI	8781769	DY3.6		chrI	6473561	K06A5.1		chrI	714226	Y18H1A.3
chrI	8822771	F36A2.11		chrI	6949625	T10B11.7		chrI	714237	Y18H1A.3
chrI	8826195	F36A2.12		chrI	7003763			chrI	714254	Y18H1A.3
chrI	8842000	F29D10.2		chrI	7003778			chrI	714255	Y18H1A.3
chrI	8856393	F55H12.6		chrI	7003859			chrI	714260	Y18H1A.3
chrI	8867019			chrI	7003873			chrI	714304	Y18H1A.3
chrI	8889009	F55H12.3		chrI	7003882			chrI	714305	Y18H1A.3
chrI	8889990	F55H12.3		chrI	7003887			chrI	714347	Y18H1A.3
chrI	8912671	T08G11.1		chrI	7003933			chrI	714348	Y18H1A.3
chrI	8942234	F53B6.2		chrI	7003951			chrI	714375	Y18H1A.3
chrI	8951248	F53B6.7		chrI	7003971			chrI	714386	Y18H1A.3
chrI	8963591	F32H2.1		chrI	7003973			chrI	718678	Y18H1A.7
chrI	8964348	F32H2.1		chrI	7003974			chrI	719176	Y18H1A.7
chrI	8982652	F32H2.5		chrI	7003986			chrI	721046	Y18H1A.6
chrI	9003724	F36F2.4		chrI	7003987			chrI	721984	Y18H1A.6
chrI	9017136	F36F2.2		chrI	7003997			chrI	721988	Y18H1A.6
chrI	9020271	F36F2.1		chrI	7004003			chrI	721989	Y18H1A.6
chrI	9043680	C31H5.6		chrI	7004324			chrI	721996	Y18H1A.6
chrI	9056357	W06D4.2		chrI	7004325			chrI	727363	Y18H1A.6
chrI	9056509	W06D4.2		chrI	7004679			chrI	727366	Y18H1A.6
chrI	9100860	W10D5.3		chrI	7004680			chrI	727392	Y18H1A.6
chrI	9132915	ZK858.4		chrI	7004743			chrI	727394	Y18H1A.6
chrI	9135797	ZK858.5		chrI	7004772			chrI	727397	Y18H1A.6
chrI	9243098	F36H2.1		chrI	7004774			chrI	727398	Y18H1A.6
chrI	9311361	F26H9.7		chrI	7004795			chrI	727399	Y18H1A.6
chrI	9351749	M04C9.1		chrI	7004820			chrI	727401	Y18H1A.6
chrI	9419938	C17E4.4		chrI	7004830			chrI	727402	Y18H1A.6
chrI	9438160	C17E4.10		chrI	7004911			chrI	727403	Y18H1A.6
chrI	9467608	F46A9.3		chrI	7004917			chrI	727404	Y18H1A.6
chrI	9467734	F46A9.3		chrI	7004927			chrI	727405	Y18H1A.6
chrI	9479178	F30A10.2		chrI	7004928			chrI	727407	Y18H1A.6
chrI	9490462	F30A10.6		chrI	7005003			chrI	727411	Y18H1A.6
chrI	9574984	C36F7.5		chrI	7005022			chrI	727415	Y18H1A.6
chrI	9574995	C36F7.5		chrI	7005031			chrI	727439	Y18H1A.6
chrI	9577458	F42H11.1		chrI	7005032			chrI	727474	Y18H1A.6
chrI	9577469	F42H11.1		chrI	7005035			chrI	727475	Y18H1A.6
chrI	9583060	K07A1.1		chrI	7005048			chrI	727494	Y18H1A.6
chrI	9587554	K07A1.3		chrI	7005117			chrI	727510	Y18H1A.6
chrI	9611806			chrI	7098419			chrI	727513	Y18H1A.6
chrI	9612815	K07A1.9		chrI	7098501			chrI	727514	Y18H1A.6
chrI	9616949	K07A1.11		chrI	7098514			chrI	727515	Y18H1A.6
chrI	9643689	T05F1.8		chrI	7098530			chrI	727530	Y18H1A.6
chrI	9675726	C04F12.1		chrI	7098697			chrI	727533	Y18H1A.6
chrI	9758258	F26E4.2		chrI	7098703			chrI	727558	Y18H1A.6
chrI	9758270	F26E4.2		chrI	7099329	F22D6.8		chrI	727775	Y18H1A.6
chrI	9891282	F52F12.1		chrI	7099330	F22D6.8		chrI	727788	Y18H1A.6
chrI	9891283	F52F12.1		chrI	7099540	F22D6.8		chrI	728635	Y18H1A.6
chrI	9891454	F52F12.1		chrI	7099556	F22D6.8		chrI	728636	Y18H1A.6
chrI	9956146	T24D1.5		chrI	7099583	F22D6.8		chrI	728646	Y18H1A.6
chrI	9989575	T23D8.6		chrI	7099651	F22D6.8		chrI	728658	Y18H1A.6
chrI	10020137	F10G8.1		chrI	7177471			chrI	728709	Y18H1A.6
chrI	10020182	F10G8.1		chrI	7239415	R06C7.3		chrI	755447	Y18H1A.9
chrI	10150393	F16C3.2		chrI	7239428	R06C7.3		chrI	816852	ZC123.3
chrI	10159700	F16C3.4		chrI	7239643	R06C7.3		chrI	827764	ZC123.3
chrI	10178918			chrI	7239666	R06C7.3		chrI	828034	ZC123.3
chrI	10184017			chrI	7239675	R06C7.3		chrI	828038	ZC123.3
chrI	10184081			chrI	7779308			chrI	828212	ZC123.3
chrI	10184331	C25A1.8		chrI	7782649			chrI	828299	ZC123.3
chrI	10260135	ZC247.2		chrI	7970160	T22C1.10		chrI	831204	ZC123.3
chrI	10320924	Y106G6G.6		chrI	7970357	T22C1.10		chrI	831285	ZC123.3
chrI	10326705	Y106G6G.2		chrI	8357894			chrI	831477	ZC123.3
chrI	10356391	ZC434.9		chrI	8699223	F39H11.2		chrI	831501	ZC123.3
chrI	10358833	ZC434.9		chrI	8699226	F39H11.2		chrI	831645	ZC123.3
chrI	10382028			chrI	8699227	F39H11.2		chrI	832685	ZC123.3
chrI	10389147	F45H11.4		chrI	8699491	F39H11.2		chrI	832994	ZC123.3
chrI	10439123	Y106G6H.5		chrI	8699492	F39H11.2		chrI	833124	ZC123.3
chrI	10439132	Y106G6H.5		chrI	8699515	F39H11.2		chrI	836512
chrI	10439822	Y106G6H.5		chrI	8951285	F53B6.7		chrI	836527
chrI	10455769			chrI	9233933			chrI	836535
chrI	10455770			chrI	9758094	F26E4.2		chrI	836536
chrI	10455902			chrI	9758095	F26E4.2		chrI	836549
chrI	10456029			chrI	9758107	F26E4.2		chrI	837066
chrI	10456054			chrI	9758118	F26E4.2		chrI	837149
chrI	10456079			chrI	9758120	F26E4.2		chrI	837239
chrI	10456098			chrI	9903615			chrI	837377
chrI	10456107			chrI	9903627			chrI	837379
chrI	10457315			chrI	9903641			chrI	837383
chrI	10457335			chrI	9903647			chrI	837390
chrI	10457343			chrI	9903734			chrI	837391
chrI	10457344			chrI	9903746			chrI	837392
chrI	10457363			chrI	9903747			chrI	837395
chrI	10457388			chrI	9903748			chrI	837396
chrI	10457413			chrI	9994648			chrI	837671
chrI	10457517			chrI	10184096			chrI	837676
chrI	10457540			chrI	10184269	C25A1.8		chrI	837682
chrI	10457672			chrI	10455925			chrI	837862
chrI	10457673			chrI	10550585			chrI	837883
chrI	10471796	Y106G6H.13		chrI	10550615			chrI	837884
chrI	10479583	F37D6.1		chrI	10639322	B0511.9		chrI	838654	ZC123.1
chrI	10484193	F37D6.1		chrI	10774429	R13H8.1		chrI	838667	ZC123.1
chrI	10515424	F59C6.7		chrI	10774613	R13H8.1		chrI	838679	ZC123.1
chrI	10523671	F59C6.2		chrI	10774626	R13H8.1		chrI	841299	ZC123.1
chrI	10550779			chrI	10774627	R13H8.1		chrI	841347	ZC123.1
chrI	10550800			chrI	10778688			chrI	841352	ZC123.1
chrI	10550801			chrI	10778706			chrI	841496	ZC123.1
chrI	10553021	F25H2.4		chrI	10778913			chrI	844566	ZC123.4
chrI	10630926	B0511.5		chrI	10778947			chrI	844567	ZC123.4
chrI	10678267	C34B2.6		chrI	10779389			chrI	844594	ZC123.4
chrI	10701573	C34B2.9		chrI	10779390			chrI	845378	ZC123.4
chrI	10717555	B0205.1		chrI	10779903			chrI	845384	ZC123.4
chrI	10728894	B0205.8		chrI	10780072			chrI	845387	ZC123.4
chrI	10778767			chrI	10781145			chrI	845402	ZC123.4
chrI	10779201			chrI	10781667			chrI	845514	ZC123.4
chrI	10782279	F55A3.5		chrI	10781668			chrI	859499	Y95B8A.7
chrI	10819465			chrI	10781741			chrI	859500	Y95B8A.7
chrI	10820099			chrI	10781758			chrI	859511	Y95B8A.7
chrI	10820196			chrI	10781817			chrI	859512	Y95B8A.7
chrI	10820349			chrI	10819184			chrI	859513	Y95B8A.7
chrI	10820365			chrI	10819188			chrI	859520	Y95B8A.7
chrI	10820370			chrI	10819196			chrI	859527	Y95B8A.7
chrI	10820371			chrI	10819198			chrI	859528	Y95B8A.7
chrI	10820372			chrI	10819211			chrI	859541	Y95B8A.7
chrI	10820380			chrI	10819221			chrI	859550	Y95B8A.7
chrI	10820392			chrI	10819224			chrI	859581	Y95B8A.7
chrI	10820400			chrI	10819260			chrI	859582	Y95B8A.7
chrI	10820486			chrI	10819268			chrI	859583	Y95B8A.7
chrI	10865041			chrI	10819276			chrI	859584	Y95B8A.7
chrI	10939142	F49D11.1		chrI	10819296			chrI	859594	Y95B8A.7
chrI	10939146	F49D11.1		chrI	10819298			chrI	859658	Y95B8A.7
chrI	10939153	F49D11.1		chrI	10819302			chrI	859715	Y95B8A.7
chrI	10939175	F49D11.1		chrI	10819303			chrI	859724	Y95B8A.7
chrI	10939176	F49D11.1		chrI	10819315			chrI	859726	Y95B8A.7
chrI	10944995	Y95D11A.1		chrI	10819341			chrI	859749	Y95B8A.7
chrI	10966406	Y52B11A.2		chrI	10819343			chrI	859750	Y95B8A.7
chrI	11011968	Y52B11A.13		chrI	10819344			chrI	859758	Y95B8A.7
chrI	11013088	Y52B11A.12		chrI	10819350			chrI	859770	Y95B8A.7
chrI	11013363	Y52B11A.12		chrI	10819354			chrI	859771	Y95B8A.7
chrI	11043517	Y52B11A.10		chrI	10819374			chrI	860509	Y95B8A.7
chrI	11142475	ZK39.4		chrI	10819407			chrI	860549	Y95B8A.7
chrI	11165727	Y52B11C.1		chrI	10819419			chrI	860560	Y95B8A.7
chrI	11165735	Y52B11C.1		chrI	10819442			chrI	860564	Y95B8A.7
chrI	11165956	Y52B11C.1		chrI	10819443			chrI	860572	Y95B8A.7
chrI	11211145	W06H12.1		chrI	10819453			chrI	860597	Y95B8A.7
chrI	11224315			chrI	10819462			chrI	860603	Y95B8A.7
chrI	11226825	Y53H1A.5		chrI	10819469			chrI	860608	Y95B8A.7
chrI	11227639	Y53H1A.5		chrI	10819473			chrI	861557	Y95B8A.7
chrI	11227694	Y53H1A.5		chrI	10819485			chrI	863113	Y95B8A.7
chrI	11229702	Y53H1A.5		chrI	10819508			chrI	863116	Y95B8A.7
chrI	11229720	Y53H1A.5		chrI	10819533			chrI	863123	Y95B8A.7
chrI	11229732	Y53H1A.5		chrI	10819544			chrI	864577	Y95B8A.7
chrI	11229735	Y53H1A.5		chrI	10819554			chrI	864635	Y95B8A.7
chrI	11230707	Y53H1A.5		chrI	10819569			chrI	865279	Y95B8A.7
chrI	11230710	Y53H1A.5		chrI	10819573			chrI	867716	Y95B8A.7
chrI	11230722	Y53H1A.5		chrI	10819575			chrI	867719	Y95B8A.7
chrI	11230740	Y53H1A.5		chrI	10819585			chrI	867724	Y95B8A.7
chrI	11231399	Y53H1A.5		chrI	10819622			chrI	867725	Y95B8A.7
chrI	11231405	Y53H1A.5		chrI	10819625			chrI	867743	Y95B8A.7
chrI	11231949	Y53H1A.5		chrI	10819672			chrI	867744	Y95B8A.7
chrI	11231973	Y53H1A.5		chrI	10819682			chrI	867745	Y95B8A.7
chrI	11232012	Y53H1A.5		chrI	10819686			chrI	867746	Y95B8A.7
chrI	11232033	Y53H1A.5		chrI	10819687			chrI	867754	Y95B8A.7
chrI	11232069	Y53H1A.5		chrI	10819710			chrI	867755	Y95B8A.7
chrI	11232160	Y53H1A.5		chrI	10819717			chrI	867756	Y95B8A.7
chrI	11232415	Y53H1A.5		chrI	10819721			chrI	867763	Y95B8A.7
chrI	11232427	Y53H1A.5		chrI	10819726			chrI	867764	Y95B8A.7
chrI	11255000	F46A8.10		chrI	10819749			chrI	867768	Y95B8A.7
chrI	11259815			chrI	10819759			chrI	867769	Y95B8A.7
chrI	11300748	Y53H1B.4		chrI	10819885			chrI	867783	Y95B8A.7
chrI	11300749	Y53H1B.4		chrI	10819900			chrI	867789	Y95B8A.7
chrI	11301247	Y53H1B.4		chrI	10819911			chrI	867790	Y95B8A.7
chrI	11303556			chrI	10819987			chrI	867831	Y95B8A.7
chrI	11309767	H25P06.4		chrI	10819997			chrI	867845	Y95B8A.7
chrI	11325490	H25P06.2		chrI	10820001			chrI	867846	Y95B8A.7
chrI	11335810	M04D5.1		chrI	10820026			chrI	867847	Y95B8A.7
chrI	11337679			chrI	10820039			chrI	867848	Y95B8A.7
chrI	11337695			chrI	10820103			chrI	867849	Y95B8A.7
chrI	11337850			chrI	10820126			chrI	867856	Y95B8A.7
chrI	11337851			chrI	10820127			chrI	867859	Y95B8A.7
chrI	11337867			chrI	10820133			chrI	867860	Y95B8A.7
chrI	11435024	C27C7.4		chrI	10820140			chrI	867862	Y95B8A.7
chrI	11435274	C27C7.4		chrI	10820158			chrI	867871	Y95B8A.7
chrI	11459043	ZK1025.4		chrI	10820170			chrI	867874	Y95B8A.7
chrI	11459044	ZK1025.4		chrI	10820171			chrI	867875	Y95B8A.7
chrI	11478740	ZK1025.10		chrI	10820180			chrI	867877	Y95B8A.7
chrI	11478990	ZK1025.10		chrI	10820181			chrI	867878	Y95B8A.7
chrI	11487061	K08C9.2		chrI	10820198			chrI	867883	Y95B8A.7
chrI	11493929	K08C9.8		chrI	10820204			chrI	867884	Y95B8A.7
chrI	11502551	F32B4.8		chrI	10820264			chrI	867889	Y95B8A.7
chrI	11574508	F15D3.6		chrI	10820275			chrI	867895	Y95B8A.7
chrI	11595781	C17D12.2		chrI	10820276			chrI	867906	Y95B8A.7
chrI	11603113			chrI	10820281			chrI	867907	Y95B8A.7
chrI	11603141			chrI	10820295			chrI	867908	Y95B8A.7
chrI	11605820	C17D12.7		chrI	10820302			chrI	868500	Y95B8A.7
chrI	11616745			chrI	10820304			chrI	868501	Y95B8A.7
chrI	11620044	C17D12.3		chrI	10820350			chrI	870099	Y95B8A.7
chrI	11623316	Y47H9A.1		chrI	10820353			chrI	870112	Y95B8A.7
chrI	11626615			chrI	10820366			chrI	870119	Y95B8A.7
chrI	11686114			chrI	10820401			chrI	873531	Y95B8A.10
chrI	11686314			chrI	10820402			chrI	875534	Y95B8A.10
chrI	11689017	T22H2.5		chrI	10820416			chrI	875610	Y95B8A.10
chrI	11700236	T22H2.1		chrI	10820442			chrI	875825	Y95B8A.10
chrI	11724242	F35E2.9		chrI	10820451			chrI	876170	Y95B8A.10
chrI	11801651	T02G6.2		chrI	10820462			chrI	877802	Y95B8A.10
chrI	11831912	Y47H9C.1		chrI	10820465			chrI	901853	Y95B8A.5
chrI	11846339	Y47H9C.2		chrI	10820488			chrI	901854	Y95B8A.5
chrI	11846342	Y47H9C.2		chrI	10820499			chrI	901855	Y95B8A.5
chrI	11846486	Y47H9C.2		chrI	10820507			chrI	901865	Y95B8A.5
chrI	11846491	Y47H9C.2		chrI	10820508			chrI	901872	Y95B8A.5
chrI	11849108	Y47H9C.2		chrI	10939385	F49D11.1		chrI	901889	Y95B8A.5
chrI	11882826	Y47H9C.5		chrI	10939390	F49D11.1		chrI	901899	Y95B8A.5
chrI	11882827	Y47H9C.5		chrI	10939400	F49D11.1		chrI	901900	Y95B8A.5
chrI	11891198			chrI	10944756	Y95D11A.1		chrI	901905	Y95B8A.5
chrI	11905142			chrI	10945120	Y95D11A.1		chrI	901910	Y95B8A.5
chrI	11922898	R06C1.2		chrI	11012190	Y52B11A.13		chrI	902854	Y95B8A.5
chrI	11924840	R06C1.3		chrI	11012446	Y52B11A.13		chrI	902861	Y95B8A.5
chrI	11924969	R06C1.3		chrI	11226819	Y53H1A.5		chrI	902864	Y95B8A.5
chrI	11928063	R06C1.3		chrI	11226829	Y53H1A.5		chrI	902873	Y95B8A.5
chrI	12008563			chrI	11226898	Y53H1A.5		chrI	902876	Y95B8A.5
chrI	12010920			chrI	11227693	Y53H1A.5		chrI	902881	Y95B8A.5
chrI	12048522	F58D5.4		chrI	11227699	Y53H1A.5		chrI	902885	Y95B8A.5
chrI	12048541	F58D5.4		chrI	11227707	Y53H1A.5		chrI	902886	Y95B8A.5
chrI	12048630	F58D5.4		chrI	11227825	Y53H1A.5		chrI	902919	Y95B8A.5
chrI	12048770	F58D5.4		chrI	11227905	Y53H1A.5		chrI	906957
chrI	12049017	F58D5.4		chrI	11227915	Y53H1A.5		chrI	927294
chrI	12049083	F58D5.4		chrI	11227920	Y53H1A.5		chrI	927437
chrI	12049096	F58D5.4		chrI	11228025	Y53H1A.5		chrI	937625
chrI	12049593	F58D5.4		chrI	11228030	Y53H1A.5		chrI	937698
chrI	12049605	F58D5.4		chrI	11228035	Y53H1A.5		chrI	937711
chrI	12049665	F58D5.4		chrI	11228276	Y53H1A.5		chrI	937725
chrI	12049688	F58D5.4		chrI	11231558	Y53H1A.5		chrI	937736
chrI	12049826	F58D5.4		chrI	11231592	Y53H1A.5		chrI	937737
chrI	12061100	F58D5.1		chrI	11232374	Y53H1A.5		chrI	937759
chrI	12061304	F58D5.1		chrI	11232375	Y53H1A.5		chrI	937883
chrI	12061305	F58D5.1		chrI	11232437	Y53H1A.5		chrI	937884
chrI	12061393	F58D5.1		chrI	11232474	Y53H1A.5		chrI	937889
chrI	12062545	F58D5.1		chrI	11301271	Y53H1B.4		chrI	946786	Y95B8A.1
chrI	12066446	F58D5.2		chrI	11337705			chrI	946816	Y95B8A.1
chrI	12067199	F58D5.2		chrI	11600106	C17D12.2		chrI	947017	Y95B8A.1
chrI	12067203	F58D5.2		chrI	11603046			chrI	947028	Y95B8A.1
chrI	12067215	F58D5.2		chrI	11603047			chrI	949986	Y34D9B.1
chrI	12067226	F58D5.2		chrI	11603059			chrI	949987	Y34D9B.1
chrI	12067227	F58D5.2		chrI	11603151			chrI	949992	Y34D9B.1
chrI	12067230	F58D5.2		chrI	11603302			chrI	949993	Y34D9B.1
chrI	12067237	F58D5.2		chrI	11603339			chrI	950002	Y34D9B.1
chrI	12067486	F58D5.2		chrI	11603340			chrI	950003	Y34D9B.1
chrI	12067497	F58D5.2		chrI	11603425			chrI	950012	Y34D9B.1
chrI	12102632	M01G12.12		chrI	11603427			chrI	950013	Y34D9B.1
chrI	12192794			chrI	11603435			chrI	950022	Y34D9B.1
chrI	12192795			chrI	11603445			chrI	950044	Y34D9B.1
chrI	12218460	F14B6.2		chrI	11603472			chrI	950062	Y34D9B.1
chrI	12218677	F14B6.2		chrI	11603473			chrI	950082	Y34D9B.1
chrI	12221058	F14B6.2		chrI	11603640			chrI	950097	Y34D9B.1
chrI	12479139			chrI	11603641			chrI	950105	Y34D9B.1
chrI	12518526	K11D2.5		chrI	11603746			chrI	950255	Y34D9B.1
chrI	12529915	W02D9.1		chrI	11604347			chrI	950328	Y34D9B.1
chrI	12583597	F33E2.4		chrI	11604443			chrI	950340	Y34D9B.1
chrI	12583625	F33E2.4		chrI	11606007	C17D12.7		chrI	950341	Y34D9B.1
chrI	12583628	F33E2.4		chrI	11606008	C17D12.7		chrI	950352	Y34D9B.1
chrI	12583641	F33E2.4		chrI	11682955			chrI	951278	Y34D9B.1
chrI	12583642	F33E2.4		chrI	11924689			chrI	952752	Y34D9B.1
chrI	12583699	F33E2.4		chrI	11924690			chrI	952997	Y34D9B.1
chrI	12621311	T07D10.2		chrI	11924714			chrI	952998	Y34D9B.1
chrI	12632157	T07D10.4		chrI	11924725			chrI	955150	Y34D9B.1
chrI	12635550	H16D19.1		chrI	11924781	R06C1.3		chrI	955171	Y34D9B.1
chrI	12663920			chrI	11924782	R06C1.3		chrI	974844
chrI	12664181			chrI	11925190	R06C1.3		chrI	975975
chrI	12671557	T26E3.3		chrI	12048923	F58D5.4		chrI	975981
chrI	12680915	T26E3.2		chrI	12049075	F58D5.4		chrI	975987
chrI	12730090	W02A11.1		chrI	12049102	F58D5.4		chrI	975988
chrI	12743054	W02A11.4		chrI	12049561	F58D5.4		chrI	976011
chrI	12743055	W02A11.4		chrI	12049562	F58D5.4		chrI	976017
chrI	12748909			chrI	12049563	F58D5.4		chrI	976023
chrI	12754994	W02A11.6		chrI	12049616	F58D5.4		chrI	1000736
chrI	12787985	Y18D10A.1		chrI	12049755	F58D5.4		chrI	1000743
chrI	12809476			chrI	12049818	F58D5.4		chrI	1000750
chrI	12809487			chrI	12049819	F58D5.4		chrI	1000755
chrI	12809589			chrI	12049865	F58D5.4		chrI	1000758
chrI	12809590			chrI	12049866	F58D5.4		chrI	1016083
chrI	12809592			chrI	12049893	F58D5.4		chrI	1017804
chrI	12809593			chrI	12108723			chrI	1017851
chrI	12809605			chrI	12735322	W02A11.2		chrI	1017852
chrI	12809606			chrI	12735323	W02A11.2		chrI	1020217
chrI	12809618			chrI	12735588	W02A11.2		chrI	1020227
chrI	12809624			chrI	12735690	W02A11.2		chrI	1020231
chrI	12809626			chrI	12742933	W02A11.4		chrI	1020232
chrI	12809629			chrI	12748765			chrI	1020253
chrI	12809635			chrI	12748882			chrI	1020254
chrI	12809636			chrI	12748891			chrI	1020257
chrI	12809639			chrI	12749021			chrI	1020305
chrI	12809641			chrI	12749131			chrI	1020306
chrI	12809642			chrI	12749132			chrI	1020313
chrI	12809643			chrI	12752932			chrI	1020315
chrI	12809650			chrI	12753177			chrI	1020316
chrI	12809652			chrI	12753179			chrI	1020322
chrI	12809654			chrI	12753203			chrI	1020329
chrI	12809657			chrI	12753206			chrI	1020343
chrI	12809687			chrI	12809442			chrI	1020346
chrI	12809688			chrI	12809477			chrI	1020369
chrI	12809729			chrI	12809478			chrI	1020374
chrI	12809752			chrI	12809479			chrI	1020375
chrI	12809755			chrI	12809486			chrI	1020407
chrI	12809797			chrI	12809678			chrI	1020416
chrI	12809803			chrI	12809679			chrI	1020417
chrI	12809806			chrI	12809690			chrI	1020418
chrI	12809807			chrI	12809711			chrI	1020659
chrI	12809809			chrI	12809715			chrI	1020660
chrI	12809812			chrI	12809738			chrI	1020676
chrI	12809819			chrI	12809744			chrI	1020677
chrI	12809833			chrI	12809754			chrI	1020682
chrI	12809875			chrI	12809813			chrI	1020683
chrI	12809887			chrI	12809822			chrI	1020684
chrI	12809892			chrI	12809832			chrI	1020686
chrI	12809901			chrI	12809847			chrI	1020690
chrI	12809902			chrI	12809851			chrI	1020697
chrI	12809903			chrI	12809852			chrI	1020719
chrI	12809918			chrI	12809855			chrI	1020730
chrI	12809920			chrI	12809890			chrI	1020736
chrI	12809973			chrI	12809895			chrI	1020737
chrI	12824264	Y18D10A.5		chrI	12809905			chrI	1020742
chrI	12833771	Y18D10A.6		chrI	12809915			chrI	1020762
chrI	12852135	Y18D10A.8		chrI	12809916			chrI	1020763
chrI	12854847	Y18D10A.9		chrI	12809926			chrI	1020764
chrI	12924818			chrI	12809941			chrI	1020777
chrI	12924825			chrI	12809950			chrI	1020784
chrI	12924844			chrI	12809962			chrI	1020789
chrI	12924867			chrI	12809963			chrI	1020806
chrI	12924950			chrI	12809967			chrI	1021404
chrI	12924954			chrI	12809972			chrI	1021409
chrI	12924975			chrI	12809976			chrI	1021425
chrI	12925091			chrI	12809991			chrI	1021426
chrI	12925194			chrI	12810088			chrI	1021427
chrI	12925211			chrI	12810092			chrI	1021447
chrI	12926337			chrI	12810093			chrI	1021459
chrI	12926354			chrI	12810094			chrI	1021461
chrI	12926457			chrI	12810099			chrI	1021466
chrI	12926573			chrI	12810117			chrI	1021469
chrI	12926594			chrI	12810118			chrI	1021472
chrI	12926598			chrI	12854733	Y18D10A.9		chrI	1021479
chrI	12926681			chrI	12854734	Y18D10A.9		chrI	1021486
chrI	12926704			chrI	12854737	Y18D10A.9		chrI	1021497
chrI	12926723			chrI	12854848	Y18D10A.9		chrI	1021498
chrI	12926730			chrI	12882792	Y18D10A.13		chrI	1021502
chrI	12927347			chrI	12925206			chrI	1021503
chrI	12927348			chrI	12926342			chrI	1021509
chrI	12932228	Y18D10A.22		chrI	12974651	C47B2.6		chrI	1021510
chrI	12944212	F08A8.2		chrI	13283327	M01E5.3		chrI	1021738
chrI	13014914	ZK256.1		chrI	13283329	M01E5.3		chrI	1021741
chrI	13014915	ZK256.1		chrI	13336413			chrI	1021758
chrI	13138299	C17H1.7		chrI	13336414			chrI	1021763
chrI	13146285	F22G12.8		chrI	13360269			chrI	1021764
chrI	13159629	F22G12.4		chrI	13360416			chrI	1021765
chrI	13159630	F22G12.4		chrI	13360420			chrI	1021766
chrI	13163145	F22G12.5		chrI	13413477			chrI	1021767
chrI	13163146	F22G12.5		chrI	13447367	Y40B1B.6		chrI	1022394
chrI	13163394	F22G12.5		chrI	13447379	Y40B1B.6		chrI	1022702
chrI	13163399	F22G12.5		chrI	13448388	Y40B1B.6		chrI	1022703
chrI	13163410	F22G12.5		chrI	13483453	Y48G10A.2		chrI	1022709
chrI	13282926	M01E5.3		chrI	13484651	Y48G10A.2		chrI	1022710
chrI	13360390			chrI	13484800	Y48G10A.2		chrI	1022726
chrI	13362007	Y40B1A.4		chrI	13484801	Y48G10A.2		chrI	1022733
chrI	13362031	Y40B1A.4		chrI	13485100	Y48G10A.2		chrI	1022740
chrI	13362032	Y40B1A.4		chrI	13485101	Y48G10A.2		chrI	1022743
chrI	13362193	Y40B1A.4		chrI	13486126	Y48G10A.2		chrI	1022746
chrI	13362199	Y40B1A.4		chrI	13486148	Y48G10A.2		chrI	1022751
chrI	13362995	Y40B1A.4		chrI	13486155	Y48G10A.2		chrI	1022752
chrI	13362996	Y40B1A.4		chrI	13486415	Y48G10A.2		chrI	1022753
chrI	13369970			chrI	13486665	Y48G10A.2		chrI	1022758
chrI	13387059	C01A2.5		chrI	13486670	Y48G10A.2		chrI	1022773
chrI	13393982	C01A2.4		chrI	13486689	Y48G10A.2		chrI	1022806
chrI	13403284	C01A2.7		chrI	13486880	Y48G10A.2		chrI	1022807
chrI	13403941	C01A2.7		chrI	13486887	Y48G10A.2		chrI	1023955
chrI	13413455			chrI	13486909	Y48G10A.2		chrI	1024320
chrI	13413456			chrI	13497009			chrI	1024341
chrI	13413560			chrI	13580668	Y87G2A.8		chrI	1024342
chrI	13417749			chrI	13583609	Y87G2A.9		chrI	1024376
chrI	13417767			chrI	13583632	Y87G2A.9		chrI	1024377
chrI	13423333	W05H12.1		chrI	13771813			chrI	1025045
chrI	13426388			chrI	13771825			chrI	1025127
chrI	13447377	Y40B1B.6		chrI	13771829			chrI	1025129
chrI	13447384	Y40B1B.6		chrI	13771830			chrI	1025137
chrI	13448393	Y40B1B.6		chrI	13771850			chrI	1025242
chrI	13448395	Y40B1B.6		chrI	13771857			chrI	1025299
chrI	13448405	Y40B1B.6		chrI	13771858			chrI	1025400
chrI	13451531	Y48G10A.6		chrI	13771947			chrI	1025430
chrI	13481041	Y48G10A.2		chrI	13771961			chrI	1025442
chrI	13481172	Y48G10A.2		chrI	13772022			chrI	1025443
chrI	13481208	Y48G10A.2		chrI	13772024			chrI	1025447
chrI	13482696	Y48G10A.2		chrI	13772030			chrI	1025452
chrI	13482870	Y48G10A.2		chrI	13772031			chrI	1025457
chrI	13484696	Y48G10A.2		chrI	13772100			chrI	1025471
chrI	13484777	Y48G10A.2		chrI	13772106			chrI	1025472
chrI	13484965	Y48G10A.2		chrI	13772115			chrI	1025473
chrI	13485814	Y48G10A.2		chrI	13772123			chrI	1025496
chrI	13485836	Y48G10A.2		chrI	13777478	Y37H9A.1		chrI	1025498
chrI	13485929	Y48G10A.2		chrI	13777798	Y37H9A.1		chrI	1025503
chrI	13485977	Y48G10A.2		chrI	13778389	Y37H9A.1		chrI	1025504
chrI	13486077	Y48G10A.2		chrI	14350145	Y105E8A.2		chrI	1025507
chrI	13486358	Y48G10A.2		chrI	14350154	Y105E8A.2		chrI	1025516
chrI	13486477	Y48G10A.2		chrI	14350201	Y105E8A.2		chrI	1025520
chrI	13497934			chrI	14350202	Y105E8A.2		chrI	1025526
chrI	13558886	Y87G2A.5		chrI	14350211	Y105E8A.2		chrI	1025530
chrI	13558949	Y87G2A.5		chrI	14350239	Y105E8A.2		chrI	1025531
chrI	13558954	Y87G2A.5		chrI	14350246	Y105E8A.2		chrI	1025540
chrI	13559028	Y87G2A.5		chrI	14350252	Y105E8A.2		chrI	1025619
chrI	13562054	Y87G2A.16		chrI	14350279	Y105E8A.2		chrI	1025627
chrI	13583295	Y87G2A.9		chrI	14350302	Y105E8A.2		chrI	1025636
chrI	13584038	Y87G2A.9		chrI	14350303	Y105E8A.2		chrI	1025642
chrI	13584065	Y87G2A.9		chrI	14350314	Y105E8A.2		chrI	1025643
chrI	13584136	Y87G2A.9		chrI	14350346	Y105E8A.2		chrI	1025647
chrI	13584141	Y87G2A.9		chrI	14350446	Y105E8A.2		chrI	1025683
chrI	13584204	Y87G2A.9		chrI	14350447	Y105E8A.2		chrI	1025687
chrI	13584411	Y87G2A.9		chrI	14350540	Y105E8A.2		chrI	1025696
chrI	13584420	Y87G2A.9		chrI	14350583	Y105E8A.2		chrI	1025718
chrI	13584459	Y87G2A.9		chrI	14350643	Y105E8A.2		chrI	1025816
chrI	13584520	Y87G2A.9		chrI	14350706	Y105E8A.2		chrI	1025829
chrI	13584533	Y87G2A.9		chrI	14350709	Y105E8A.2		chrI	1025833
chrI	13584565	Y87G2A.9		chrI	14365526	Y105E8A.3		chrI	1025842
chrI	13639648			chrI	14365867	Y105E8A.3		chrI	1025864
chrI	13658166	W09C5.8		chrI	14365883	Y105E8A.3		chrI	1025875
chrI	13660601	W09C5.9		chrI	14365884	Y105E8A.3		chrI	1025880
chrI	13661244	W09C5.9		chrI	14365913	Y105E8A.3		chrI	1025882
chrI	13664317	W04A4.5		chrI	14365980	Y105E8A.3		chrI	1025885
chrI	13685843	W04A4.6		chrI	14365996	Y105E8A.3		chrI	1025893
chrI	13685844	W04A4.6		chrI	14400324			chrI	1025931
chrI	13685874	W04A4.6		chrI	14400336			chrI	1025942
chrI	13686000	W04A4.6		chrI	14400337			chrI	1025949
chrI	13687193	W04A4.6		chrI	14400358			chrI	1025957
chrI	13711061	Y6B3B.3		chrI	14400359			chrI	1025969
chrI	13711062	Y6B3B.3		chrI	14400364			chrI	1026275
chrI	13711337	Y6B3B.3		chrI	14400387			chrI	1026321
chrI	13711346	Y6B3B.3		chrI	14400403			chrI	1026469
chrI	13711363	Y6B3B.3		chrI	14400408			chrI	1031165
chrI	13711376	Y6B3B.3		chrI	14400551			chrI	1031168
chrI	13711385	Y6B3B.3		chrI	14400592			chrI	1031169
chrI	13711387	Y6B3B.3		chrI	14400599			chrI	1031171
chrI	13711416	Y6B3B.3		chrI	14400600			chrI	1031172
chrI	13711584	Y6B3B.3		chrI	14400601			chrI	1031182
chrI	13711601	Y6B3B.3		chrI	14400607			chrI	1031194
chrI	13711605	Y6B3B.3		chrI	14400619			chrI	1031196
chrI	13711606	Y6B3B.3		chrI	14513287	Y105E8A.22		chrI	1031199
chrI	13730490	Y6B3B.10		chrI	14513536	Y105E8A.22		chrI	1031202
chrI	13730676	Y6B3B.10		chrI	14513537	Y105E8A.22		chrI	1031205
chrI	13730677	Y6B3B.10		chrI	14513791	Y105E8A.22		chrI	1031206
chrI	13730771	Y6B3B.10		chrI	14513823	Y105E8A.22		chrI	1031207
chrI	13730782	Y6B3B.10		chrI	14538666	Y105E8A.26		chrI	1031208
chrI	13743634	Y6B3B.9		chrI	14567579	Y105E8A.24		chrI	1031209
chrI	13758111	Y6B3B.4		chrI	14567584	Y105E8A.24		chrI	1031210
chrI	13772023			chrI	14567589	Y105E8A.24		chrI	1031211
chrI	13772041			chrI	14567590	Y105E8A.24		chrI	1031220
chrI	13772050			chrI	14568022	Y105E8A.24		chrI	1031223
chrI	13772141			chrI	14568040	Y105E8A.24		chrI	1031246
chrI	13772173			chrI	14568042	Y105E8A.24		chrI	1031262
chrI	13772174			chrI	14568047	Y105E8A.24		chrI	1031264
chrI	13772274			chrI	14568055	Y105E8A.24		chrI	1031265
chrI	13772276			chrI	14568057	Y105E8A.24		chrI	1031271
chrI	13772277			chrI	14568064	Y105E8A.24		chrI	1031292
chrI	13772288			chrI	14568090	Y105E8A.24		chrI	1031293
chrI	13772311			chrI	14568111	Y105E8A.24		chrI	1031294
chrI	13772316			chrI	14568112	Y105E8A.24		chrI	1031300
chrI	13778428	Y37H9A.1		chrI	14568113	Y105E8A.24		chrI	1031301
chrI	13797914	W09G3.7		chrI	14568136	Y105E8A.24		chrI	1031312
chrI	13814747	W09G3.6		chrI	14568137	Y105E8A.24		chrI	1031320
chrI	13826130	W09G3.6		chrI	14568146	Y105E8A.24		chrI	1031322
chrI	13826133	W09G3.6		chrI	14568149	Y105E8A.24		chrI	1031323
chrI	13826134	W09G3.6		chrI	14568210	Y105E8A.24		chrI	1031324
chrI	13826135	W09G3.6		chrI	14649125	Y105E8B.4		chrI	1031330
chrI	13838640	W04A8.1		chrI	14649148	Y105E8B.4		chrI	1031331
chrI	13889764			chrI	14649663	Y105E8B.4		chrI	1031332
chrI	13889770			chrI	14649824	Y105E8B.4		chrI	1031337
chrI	13891519			chrI	14649861	Y105E8B.4		chrI	1031366
chrI	13891818			chrI	14660361	Y105E8B.5		chrI	1031371
chrI	13891839			chrI	14660364	Y105E8B.5		chrI	1031374
chrI	13891916			chrI	14660373	Y105E8B.5		chrI	1031375
chrI	13892651			chrI	14664062			chrI	1031391
chrI	13892728			chrI	14963406	ZK909.4		chrI	1031404
chrI	13892749			chrI	14963461	ZK909.4		chrI	1031864
chrI	13893048			chrII	62385	C23H3.2		chrI	1031865
chrI	13912240	Y71A12B.4		chrII	62412	C23H3.2		chrI	1031868
chrI	13965755	Y71A12B.13		chrII	62443	C23H3.2		chrI	1031891
chrI	13970281	Y71A12B.14		chrII	99192			chrI	1031898
chrI	13970871			chrII	99193			chrI	1032053
chrI	13988273	Y71A12B.17		chrII	99345			chrI	1032069
chrI	13988608	Y71A12B.17		chrII	99352			chrI	1032434
chrI	13988613	Y71A12B.17		chrII	99358			chrI	1033049
chrI	14000449	Y71A12B.18		chrII	99528			chrI	1033395
chrI	14018936	ZC334.10		chrII	99568			chrI	1034881
chrI	14083542	Y63D3A.9		chrII	99576			chrI	1036790
chrI	14090466			chrII	99581			chrI	1036810
chrI	14168749	C37A5.8		chrII	99621			chrI	1036833
chrI	14264006	F09C3.1		chrII	99656			chrI	1036853
chrI	14264007	F09C3.1		chrII	99666			chrI	1040031
chrI	14264022	F09C3.1		chrII	99682			chrI	1040037
chrI	14264023	F09C3.1		chrII	225718	Y43H11AL.1		chrI	1042806
chrI	14284354	F09C3.5		chrII	225744	Y43H11AL.1		chrI	1042809
chrI	14312120	F49B2.3		chrII	225765	Y43H11AL.1		chrI	1042819
chrI	14350091	Y105E8A.2		chrII	225781	Y43H11AL.1		chrI	1042825
chrI	14350476	Y105E8A.2		chrII	225784	Y43H11AL.1		chrI	1042844
chrI	14350705	Y105E8A.2		chrII	226424	Y43H11AL.1		chrI	1042855
chrI	14350739	Y105E8A.2		chrII	226434	Y43H11AL.1		chrI	1042857
chrI	14350768	Y105E8A.2		chrII	226441	Y43H11AL.1		chrI	1042858
chrI	14350774	Y105E8A.2		chrII	226446	Y43H11AL.1		chrI	1042859
chrI	14351452	Y105E8A.2		chrII	226464	Y43H11AL.1		chrI	1042867
chrI	14351801	Y105E8A.2		chrII	226491	Y43H11AL.1		chrI	1042869
chrI	14354532	Y105E8A.2		chrII	226511	Y43H11AL.1		chrI	1042870
chrI	14354546	Y105E8A.2		chrII	226512	Y43H11AL.1		chrI	1042957
chrI	14365546	Y105E8A.3		chrII	227383	Y43H11AL.1		chrI	1043569
chrI	14365577	Y105E8A.3		chrII	227420	Y43H11AL.1		chrI	1043842
chrI	14369032	Y105E8A.4		chrII	227421	Y43H11AL.1		chrI	1043888
chrI	14375818	Y105E8A.5		chrII	315413	K01A2.3		chrI	1043931
chrI	14429118	Y105E8A.10		chrII	424289	C24H12.9		chrI	1046464
chrI	14448181	Y105E8A.12		chrII	424464	C24H12.9		chrI	1048874	Y34D9A.8
chrI	14448182	Y105E8A.12		chrII	431265	C24H12.3		chrI	1048877	Y34D9A.8
chrI	14448187	Y105E8A.12		chrII	431335	C24H12.3		chrI	1050640
chrI	14448188	Y105E8A.12		chrII	431345	C24H12.3		chrI	1050690
chrI	14448193	Y105E8A.12		chrII	431354	C24H12.3		chrI	1050701
chrI	14461715	Y105E8A.13		chrII	431359	C24H12.3		chrI	1050703
chrI	14463673	Y105E8A.13		chrII	431367	C24H12.3		chrI	1050777	Y34D9A.8
chrI	14472203	Y105E8A.17		chrII	431371	C24H12.3		chrI	1051011	Y34D9A.8
chrI	14497855	Y105E8A.28		chrII	431380	C24H12.3		chrI	1051297	Y34D9A.8
chrI	14505135	Y105E8A.21		chrII	431534	C24H12.3		chrI	1051634	Y34D9A.8
chrI	14505144	Y105E8A.21		chrII	431645	C24H12.3		chrI	1051635	Y34D9A.8
chrI	14505150	Y105E8A.21		chrII	431646	C24H12.3		chrI	1053015	Y34D9A.8
chrI	14505158	Y105E8A.21		chrII	431651	C24H12.3		chrI	1053016	Y34D9A.8
chrI	14505166	Y105E8A.21		chrII	431657	C24H12.3		chrI	1053025	Y34D9A.8
chrI	14505640	Y105E8A.21		chrII	431670	C24H12.3		chrI	1053071	Y34D9A.8
chrI	14513048	Y105E8A.22		chrII	431671	C24H12.3		chrI	1053974	Y34D9A.10
chrI	14513067	Y105E8A.22		chrII	431674	C24H12.3		chrI	1054329	Y34D9A.10
chrI	14513080	Y105E8A.22		chrII	431677	C24H12.3		chrI	1054442	Y34D9A.10
chrI	14513090	Y105E8A.22		chrII	431698	C24H12.3		chrI	1056151	Y34D9A.10
chrI	14513099	Y105E8A.22		chrII	431708	C24H12.3		chrI	1056550	Y34D9A.10
chrI	14513108	Y105E8A.22		chrII	431709	C24H12.3		chrI	1056560	Y34D9A.10
chrI	14513118	Y105E8A.22		chrII	431837	C24H12.3		chrI	1056583	Y34D9A.10
chrI	14513119	Y105E8A.22		chrII	431838	C24H12.3		chrI	1056614	Y34D9A.10
chrI	14513337	Y105E8A.22		chrII	431850	C24H12.3		chrI	1056619	Y34D9A.10
chrI	14513380	Y105E8A.22		chrII	431857	C24H12.3		chrI	1056625	Y34D9A.10
chrI	14513381	Y105E8A.22		chrII	431901	C24H12.3		chrI	1056626	Y34D9A.10
chrI	14513428	Y105E8A.22		chrII	432000	C24H12.3		chrI	1056632	Y34D9A.10
chrI	14513529	Y105E8A.22		chrII	432022	C24H12.3		chrI	1056637	Y34D9A.10
chrI	14513581	Y105E8A.22		chrII	432023	C24H12.3		chrI	1056638	Y34D9A.10
chrI	14513582	Y105E8A.22		chrII	432037	C24H12.3		chrI	1056652	Y34D9A.10
chrI	14513592	Y105E8A.22		chrII	432049	C24H12.3		chrI	1056653	Y34D9A.10
chrI	14513596	Y105E8A.22		chrII	432097	C24H12.3		chrI	1056739	Y34D9A.10
chrI	14513608	Y105E8A.22		chrII	432158	C24H12.3		chrI	1056772	Y34D9A.10
chrI	14513611	Y105E8A.22		chrII	432171	C24H12.3		chrI	1056773	Y34D9A.10
chrI	14513648	Y105E8A.22		chrII	432211	C24H12.3		chrI	1056790	Y34D9A.10
chrI	14513651	Y105E8A.22		chrII	432212	C24H12.3		chrI	1056797	Y34D9A.10
chrI	14513652	Y105E8A.22		chrII	432251	C24H12.3		chrI	1056799	Y34D9A.10
chrI	14513659	Y105E8A.22		chrII	432253	C24H12.3		chrI	1056801	Y34D9A.10
chrI	14513722	Y105E8A.22		chrII	432287	C24H12.3		chrI	1056802	Y34D9A.10
chrI	14513810	Y105E8A.22		chrII	432303	C24H12.3		chrI	1056813	Y34D9A.10
chrI	14513811	Y105E8A.22		chrII	432318	C24H12.3		chrI	1056840	Y34D9A.10
chrI	14513853	Y105E8A.22		chrII	432321	C24H12.3		chrI	1056841	Y34D9A.10
chrI	14513892	Y105E8A.22		chrII	432340	C24H12.3		chrI	1057821	Y34D9A.10
chrI	14521687			chrII	432386	C24H12.3		chrI	1058148	Y34D9A.10
chrI	14567869	Y105E8A.24		chrII	432391	C24H12.3		chrI	1058162	Y34D9A.10
chrI	14567870	Y105E8A.24		chrII	432399	C24H12.3		chrI	1058163	Y34D9A.10
chrI	14604708			chrII	432426	C24H12.3		chrI	1058164	Y34D9A.10
chrI	14604747			chrII	432433	C24H12.3		chrI	1058165	Y34D9A.10
chrI	14604750			chrII	432453	C24H12.3		chrI	1058167	Y34D9A.10
chrI	14604752			chrII	432456	C24H12.3		chrI	1058173	Y34D9A.10
chrI	14604753			chrII	432464	C24H12.3		chrI	1058174	Y34D9A.10
chrI	14644863	Y105E8B.7		chrII	432475	C24H12.3		chrI	1058189	Y34D9A.10
chrI	14644878	Y105E8B.7		chrII	432476	C24H12.3		chrI	1058190	Y34D9A.10
chrI	14649565	Y105E8B.4		chrII	432477	C24H12.3		chrI	1058191	Y34D9A.10
chrI	14649672	Y105E8B.4		chrII	432491	C24H12.3		chrI	1058196	Y34D9A.10
chrI	14649685	Y105E8B.4		chrII	432519	C24H12.3		chrI	1058203	Y34D9A.10
chrI	14654703	Y105E8B.3		chrII	432534	C24H12.3		chrI	1058207	Y34D9A.10
chrI	14654716	Y105E8B.3		chrII	432547	C24H12.3		chrI	1058212	Y34D9A.10
chrI	14654719	Y105E8B.3		chrII	432549	C24H12.3		chrI	1058222	Y34D9A.10
chrI	14660277	Y105E8B.5		chrII	432552	C24H12.3		chrI	1058227	Y34D9A.10
chrI	14660278	Y105E8B.5		chrII	432569	C24H12.3		chrI	1058228	Y34D9A.10
chrI	14702247	Y54E5A.4		chrII	432570	C24H12.3		chrI	1058245	Y34D9A.10
chrI	14702248	Y54E5A.4		chrII	432576	C24H12.3		chrI	1058246	Y34D9A.10
chrI	14702403	Y54E5A.4		chrII	432577	C24H12.3		chrI	1058252	Y34D9A.10
chrI	14702670	Y54E5A.4		chrII	432578	C24H12.3		chrI	1058255	Y34D9A.10
chrI	14702671	Y54E5A.4		chrII	432593	C24H12.3		chrI	1058256	Y34D9A.10
chrI	14702689	Y54E5A.4		chrII	432600	C24H12.3		chrI	1058262	Y34D9A.10
chrI	14702709	Y54E5A.4		chrII	432614	C24H12.3		chrI	1058270	Y34D9A.10
chrI	14703943	Y54E5A.4		chrII	432621	C24H12.3		chrI	1058275	Y34D9A.10
chrI	14703944	Y54E5A.4		chrII	432649	C24H12.3		chrI	1058278	Y34D9A.10
chrI	14704355	Y54E5A.4		chrII	432663	C24H12.3		chrI	1058499	Y34D9A.10
chrI	14715016	Y54E5A.7		chrII	432670	C24H12.3		chrI	1058509	Y34D9A.10
chrI	14736738	K05C4.4		chrII	432680	C24H12.3		chrI	1058548	Y34D9A.10
chrI	14754454			chrII	432681	C24H12.3		chrI	1058649	Y34D9A.10
chrI	14754459			chrII	432682	C24H12.3		chrI	1058670	Y34D9A.10
chrI	14754466			chrII	432691	C24H12.3		chrI	1058671	Y34D9A.10
chrI	14754490			chrII	432707	C24H12.3		chrI	1059354	Y34D9A.10
chrI	14760323	F39B2.6		chrII	432719	C24H12.3		chrI	1059550	Y34D9A.10
chrI	14772460	F39B2.7		chrII	432722	C24H12.3		chrI	1059552	Y34D9A.10
chrI	14852159	F32A7.6		chrII	432728	C24H12.3		chrI	1062627
chrI	14870538	F11C3.1		chrII	432742			chrI	1063847
chrI	14913863	F21F12.1		chrII	432756			chrI	1063855
chrI	14934926	ZK909.2		chrII	432757			chrI	1063856
chrI	14944979	ZK909.2		chrII	432818			chrI	1063894
chrI	15005601	F33H2.5		chrII	432845			chrI	1063925
chrI	15033913			chrII	432857			chrI	1063926
chrII	40874			chrII	432859			chrI	1063928
chrII	57966	C23H3.3		chrII	433527			chrI	1064093
chrII	62170	C23H3.2		chrII	433532			chrI	1064115
chrII	62187	C23H3.2		chrII	433544			chrI	1064120
chrII	62188	C23H3.2		chrII	433632			chrI	1064125
chrII	62190	C23H3.2		chrII	433633			chrI	1064130
chrII	62209	C23H3.2		chrII	433647			chrI	1064131
chrII	62210	C23H3.2		chrII	433667	C24H12.12		chrI	1064138
chrII	62212	C23H3.2		chrII	433670	C24H12.12		chrI	1064535
chrII	62230	C23H3.2		chrII	433682	C24H12.12		chrI	1065182
chrII	62388	C23H3.2		chrII	433698	C24H12.12		chrI	1065591	Y34D9A.10
chrII	62400	C23H3.2		chrII	433708	C24H12.12		chrI	1066280	Y34D9A.10
chrII	62444	C23H3.2		chrII	433709	C24H12.12		chrI	1066300	Y34D9A.10
chrII	90685	C50D2.9		chrII	433719	C24H12.12		chrI	1066554	Y34D9A.10
chrII	90686	C50D2.9		chrII	433726	C24H12.12		chrI	1068741	R06A10.2
chrII	95692			chrII	433740	C24H12.12		chrI	1068742	R06A10.2
chrII	99183			chrII	433768	C24H12.12		chrI	1069597	R06A10.2
chrII	99386			chrII	433775	C24H12.12		chrI	1071651	R06A10.2
chrII	99540			chrII	433789	C24H12.12		chrI	1094431	R06A10.4
chrII	99545			chrII	433796	C24H12.12		chrI	1101596
chrII	99615			chrII	433811	C24H12.12		chrI	1101597
chrII	99657			chrII	433812	C24H12.12		chrI	1101602
chrII	99683			chrII	433813	C24H12.12		chrI	1101605
chrII	109665	C50D2.2		chrII	433819	C24H12.12		chrI	1101607
chrII	152636	T25D3.4		chrII	433820	C24H12.12		chrI	1101608
chrII	167765	T01D1.2		chrII	433837	C24H12.12		chrI	1101612
chrII	170376	T01D1.2		chrII	433840	C24H12.12		chrI	1101615
chrII	200148	F48A11.2		chrII	433842	C24H12.12		chrI	1101616
chrII	211247	F48A11.1		chrII	433855	C24H12.12		chrI	1101617
chrII	211393	F48A11.1		chrII	433870	C24H12.12		chrI	1101618
chrII	226466	Y43H11AL.1		chrII	433898	C24H12.12		chrI	1101637
chrII	226467	Y43H11AL.1		chrII	433912	C24H12.12		chrI	1118562
chrII	226475	Y43H11AL.1		chrII	433913	C24H12.12		chrI	1120504
chrII	226479	Y43H11AL.1		chrII	433914	C24H12.12		chrI	1128413	ZK993.1
chrII	226487	Y43H11AL.1		chrII	433925	C24H12.12		chrI	1138296	Y48G8AL.9
chrII	226488	Y43H11AL.1		chrII	433933	C24H12.12		chrI	1138300	Y48G8AL.9
chrII	226492	Y43H11AL.1		chrII	433936	C24H12.12		chrI	1138301	Y48G8AL.9
chrII	227558	Y43H11AL.1		chrII	433956	C24H12.12		chrI	1138302	Y48G8AL.9
chrII	227581	Y43H11AL.1		chrII	433963	C24H12.12		chrI	1138308	Y48G8AL.9
chrII	227603	Y43H11AL.1		chrII	433990	C24H12.12		chrI	1138311	Y48G8AL.9
chrII	227620	Y43H11AL.1		chrII	433998	C24H12.12		chrI	1138327	Y48G8AL.9
chrII	227633	Y43H11AL.1		chrII	434003	C24H12.12		chrI	1138329	Y48G8AL.9
chrII	227660	Y43H11AL.1		chrII	434049	C24H12.12		chrI	1138331	Y48G8AL.9
chrII	227661	Y43H11AL.1		chrII	434052	C24H12.12		chrI	1138332	Y48G8AL.9
chrII	228232	Y43H11AL.1		chrII	434057	C24H12.12		chrI	1138339	Y48G8AL.9
chrII	228235	Y43H11AL.1		chrII	434068	C24H12.12		chrI	1138340	Y48G8AL.9
chrII	228263	Y43H11AL.1		chrII	434071	C24H12.12		chrI	1138345	Y48G8AL.9
chrII	228274	Y43H11AL.1		chrII	434077	C24H12.12		chrI	1138353	Y48G8AL.9
chrII	239517			chrII	434080	C24H12.12		chrI	1138355	Y48G8AL.9
chrII	239518			chrII	434086	C24H12.12		chrI	1138362	Y48G8AL.9
chrII	239527			chrII	434093	C24H12.12		chrI	1138442	Y48G8AL.9
chrII	239528			chrII	434102	C24H12.12		chrI	1138602	Y48G8AL.9
chrII	239536			chrII	434105	C24H12.12		chrI	1138603	Y48G8AL.9
chrII	239537			chrII	434108	C24H12.12		chrI	1138607	Y48G8AL.9
chrII	239546			chrII	434136	C24H12.12		chrI	1138608	Y48G8AL.9
chrII	239552			chrII	434138	C24H12.12		chrI	1138617	Y48G8AL.9
[truncated: 95,284 more rows]
