# Supplementary material for: A-to-I RNA editing promotes developmental stage–specific gene and lncRNA expression
Source: HighWire-hosted journal article supplement (doi:10.1101/gr.211169.116), 2016-12-28
Supplement: Supplemental_Table_S4.xlsx [file Supplemental_Table_S4.xlsx]

## Sheet: Embryo stage N2_vs_ADAR
Gene ID	Normalized mean counts wildtype	Normalized mean counts ADAR mutants	foldChange ADAR mutant/wildtype	pval	padj
2L52.1|2L52.1|2L52.1	1110	1090	0.9814	2.23e-05	9.45e-05
2L52.2|2L52.2	106	136	1.2885	0.00582	0.0169
2RSSE.1|2RSSE.1|2RSSE.1	1570	1820	1.1542	6.05e-06	2.75e-05
2RSSE.2|2RSSE.2|2RSSE.2	723	820	1.135	0.415	0.665
2RSSE.3|2RSSE.3	525	590	1.1222	0.709	0.958
2RSSE.4|2RSSE.4	0	0	NaN	NA	NA
2RSSE.5|2RSSE.5	124	160	1.295	0.00234	0.00734
2RSSE.6|2RSSE.6	16.4	9.24	0.5622	0.765	1
2RSSE.7|2RSSE.7	121	165	1.3595	7.59e-05	0.0003
2RSSE.8|2RSSE.8	0.131	0	0	0.956	1
3R5.2|3R5.2	296	307	1.0344	0.74	0.985
4R79.2|4R79.2|4R79.2a	85.6	75	0.8765	0.437	0.691
4R79.2|4R79.2|4R79.2b	83	72.3	0.8709	0.405	0.652
6R55.2|6R55.2|6R55.2	3.27	3.04	0.9301	1	1
AC3.11|AC3.11	0	0	NaN	NA	NA
AC3.12|AC3.12	0	0.147	Inf	1	1
AC3.13|AC3.13	20.3	15	0.7388	0.272	0.48
AC3.14|AC3.14	1.38	1.47	1.0679	0.841	1
AC3.15|AC3.15	0	0	NaN	NA	NA
AC3.16|AC3.16	8.61	6.54	0.7597	0.237	0.43
AC3.5|AC3.5|AC3.5	65.6	70	1.068	0.334	0.564
AC3.9|AC3.9	378	342	0.9048	0.0881	0.189
AC7.3|AC7.3|AC7.3	0.151	0.294	1.9436	1	1
AC8.10|AC8.10|AC8.10	241	228	0.9456	0.749	0.991
AC8.11|AC8.11|AC8.11	143	136	0.9499	0.742	0.987
AC8.12|AC8.12|AC8.12	112	102	0.9134	0.00912	0.0254
AC8.2|AC8.2	12.3	14.9	1.2092	0.215	0.398
AC8.3|AC8.3|AC8.3	241	228	0.9456	0.749	0.991
AC8.4|AC8.4|AC8.4	143	136	0.9499	0.742	0.987
AC8.5|AC8.5	289	309	1.0685	0.00336	0.0102
AC8.6|AC8.6	89.8	92.7	1.0321	0.521	0.782
AC8.7|AC8.7|AC8.7	112	102	0.9134	0.00912	0.0254
AC8.9|AC8.9	136	119	0.8742	0.0176	0.0461
AH10.2|AH10.2|AH10.2	78.1	39.9	0.5107	1.68e-12	1.42e-11
AH10.3|AH10.3|AH10.3	85.9	112	1.3087	4.31e-08	2.47e-07
AH10.4|AH10.4|AH10.4	11.8	10.8	0.9155	0.83	1
AH10.7|AH10.7	0	0	NaN	NA	NA
AH10.8|AH10.8	0.727	2.27	3.1209	0.0456	0.107
AH10.9|AH10.9	0	0	NaN	NA	NA
AH6.3|AH6.3|AH6.3	1.7	0.919	0.5392	1	1
AH9.1|AH9.1|AH9.1	120	93.9	0.781	0.0005	0.00175
AH9.3|AH9.3|AH9.3	985	955	0.9697	0.375	0.616
AH9.4|AH9.4|AH9.4	21.1	18.1	0.8585	0.287	0.501
AH9.6|AH9.6|AH9.6	99	108	1.0931	0.776	1
AH9.7|AH9.7|AH9.7	121	102	0.8404	0.000746	0.00254
B0001.10|B0001.10	0.466	0	0	0.742	0.987
B0001.11|B0001.11	1.91	4.15	2.1729	0.102	0.214
B0001.12|B0001.12	4.52	4.35	0.9628	0.402	0.648
B0001.2|B0001.2|B0001.2	925	774	0.8362	0.728	0.975
B0001.3|B0001.3|B0001.3a	1050	1070	1.017	0.255	0.456
B0001.3|B0001.3|B0001.3b	1010	1030	1.0247	0.145	0.288
B0001.4|B0001.4|B0001.4	817	758	0.9274	6.15e-05	0.000245
B0001.5|B0001.5|B0001.5	1110	1150	1.0368	0.214	0.396
B0001.6|B0001.6|B0001.6	6090	6550	1.0759	3.01e-15	3.15e-14
B0001.7|B0001.7|B0001.7	1390	1220	0.8769	0.718	0.966
B0001.8|B0001.8|B0001.8	3190	2920	0.9137	0.516	0.778
B0019.2|B0019.2|B0019.2	2170	1970	0.9046	0.000167	0.000629
B0024.10|B0024.10|B0024.10	1580	1340	0.848	4.05e-08	2.33e-07
B0024.11|B0024.11|B0024.11	1150	1060	0.917	4.24e-05	0.000173
B0024.13|B0024.13|B0024.13a	388	305	0.7862	4.36e-09	2.78e-08
B0024.13|B0024.13|B0024.13b	359	281	0.7828	8.04e-09	4.99e-08
B0024.15|B0024.15|B0024.15	50.9	47.1	0.9249	0.0159	0.0421
B0024.17|B0024.17	0.282	0	0	0.901	1
B0024.18|B0024.18	0	0.147	Inf	1	1
B0024.3|B0024.3|B0024.3	138	108	0.7871	0.00477	0.0141
B0024.4|B0024.4|B0024.4	59.2	39.3	0.6631	1.73e-11	1.36e-10
B0025.4|B0025.4|B0025.4	1090	971	0.8872	0.00313	0.00957
B0025.5|B0025.5|B0025.5	3.97	5.11	1.2877	0.786	1
B0025.6|B0025.6	0	0.885	Inf	0.344	0.578
B0034.10|B0034.10	0	0	NaN	NA	NA
B0034.11|B0034.11	0	0.147	Inf	1	1
B0034.12|B0034.12	0.151	0	0	0.956	1
B0034.13|B0034.13	1.05	1.78	1.6941	0.367	0.605
B0034.14|B0034.14	0	0	NaN	NA	NA
B0034.15|B0034.15	0	0.113	Inf	1	1
B0034.16|B0034.16	0.282	0.744	2.639	0.74	0.986
B0034.17|B0034.17	1.51	1.22	0.8049	0.503	0.764
B0034.1|B0034.1|B0034.1	179	153	0.8545	0.00301	0.00925
B0034.2|B0034.2|B0034.2	0	0.45	Inf	0.843	1
B0034.4|B0034.4|B0034.4	8.49	13.8	1.6285	0.0224	0.0568
B0034.5|B0034.5|B0034.5	48.7	37.2	0.7642	0.0354	0.0855
B0034.7|B0034.7|B0034.7	107	112	1.0448	0.513	0.775
B0034.8|B0034.8	0.131	0.597	4.569	0.783	1
B0034.9|B0034.9	0	0.147	Inf	1	1
B0035.11|B0035.11|B0035.11	3490	3440	0.9855	0.915	1
B0035.12|B0035.12|B0035.12	3530	3360	0.953	0.437	0.691
B0035.13|B0035.13|B0035.13	80.4	103	1.2823	0.000323	0.00116
B0035.15|B0035.15|B0035.15	608	488	0.8018	7.44e-14	6.98e-13
B0035.16|B0035.16|B0035.16	418	279	0.6663	8.11e-38	2.45e-36
B0035.18|B0035.18|B0035.18	128	113	0.885	0.0114	0.0312
B0035.19|B0035.19	0	0.53	Inf	0.722	0.97
B0035.1|B0035.1|B0035.1a	1670	1690	1.0103	0.163	0.317
B0035.1|B0035.1|B0035.1b	2130	2100	0.9867	0.00716	0.0204
B0035.3|B0035.3|B0035.3	453	364	0.8029	8.62e-11	6.38e-10
B0035.6|B0035.6|B0035.6	1360	1150	0.8397	1.73e-06	8.42e-06
B0041.10|B0041.10	0.261	1.24	4.7429	0.164	0.319
B0041.1|B0041.1|B0041.1	19.5	11.1	0.5684	0.509	0.771
B0041.3|B0041.3|B0041.3	320	277	0.8647	0.00171	0.00552
B0041.5|B0041.5|B0041.5	1100	987	0.8966	4.48e-06	2.07e-05
B0041.8|B0041.8|B0041.8	1930	1660	0.863	1.19e-22	1.93e-21
B0041.9|B0041.9	0	0	NaN	NA	NA
B0198.10|B0198.10	0	0	NaN	NA	NA
B0198.2|B0198.2|B0198.2a	53.6	60.4	1.1277	0.00951	0.0264
B0198.2|B0198.2|B0198.2b	35.2	45.4	1.2924	0.0394	0.0939
B0198.3|B0198.3	53.5	61.9	1.1569	0.555	0.818
B0198.3|B0198.3|B0198.3a	578	700	1.2117	1.35e-10	9.81e-10
B0198.4|B0198.4	0	0	NaN	NA	NA
B0198.5|B0198.5	0	0.294	Inf	0.985	1
B0198.6|B0198.6	0	0.36	Inf	0.956	1
B0198.7|B0198.7	0	0.209	Inf	1	1
B0198.8|B0198.8	0	0	NaN	NA	NA
B0198.9|B0198.9	0	0.226	Inf	1	1
B0205.10|B0205.10|B0205.10	11.8	15.9	1.3481	0.148	0.293
B0205.11|B0205.11|B0205.11	1060	979	0.9249	6.05e-13	5.29e-12
B0205.12|B0205.12|B0205.12	89	98.7	1.1081	0.846	1
B0205.13|B0205.13|B0205.13	32.5	52	1.5971	0.283	0.495
B0205.14|B0205.14|B0205.14	1.75	2.48	1.4232	0.66	0.915
B0205.15|B0205.15	0	0.152	Inf	1	1
B0205.16|B0205.16	0.184	0.36	1.9605	1	1
B0205.1|B0205.1|B0205.1a	1770	1580	0.8906	0.0792	0.172
B0205.1|B0205.1|B0205.1b	4010	3510	0.8742	4.25e-06	1.97e-05
B0205.4|B0205.4|B0205.4	347	368	1.0601	0.0247	0.0619
B0205.5|B0205.5|B0205.5	6.26	4.89	0.7809	0.827	1
B0205.6|B0205.6|B0205.6	839	790	0.9418	9.76e-05	0.000379
B0205.8|B0205.8|B0205.8	455	423	0.9306	0.338	0.569
B0205.9|B0205.9|B0205.9	1470	1380	0.9361	0.741	0.986
B0207.10|B0207.10|B0207.10	7.7	6.96	0.9044	0.734	0.98
B0207.11|B0207.11|B0207.11	1.15	1.18	1.0292	1	1
B0207.13|B0207.13	8.66	9.38	1.0825	0.698	0.95
B0207.14|B0207.14	0.445	0	0	0.759	0.999
B0207.15|B0207.15	0.142	0.152	1.0675	1	1
B0207.16|B0207.16	0	0	NaN	NA	NA
B0207.1|B0207.1|B0207.1	2.78	1.89	0.6786	1	1
B0207.2|B0207.2|B0207.2	122	122	0.997	0.199	0.373
B0207.5|B0207.5|B0207.5	129	90.1	0.6977	0.0062	0.0179
B0207.6|B0207.6|B0207.6	458	350	0.7631	2.81e-17	3.37e-16
B0207.7|B0207.7|B0207.7	3.38	4.46	1.3176	0.667	0.921
B0207.8|B0207.8|B0207.8	0.392	0.559	1.4252	1	1
B0207.9|B0207.9|B0207.9	0.445	0.521	1.1694	1	1
B0212.3|B0212.3|B0212.3	929	722	0.7769	0.000892	0.00301
B0212.4|B0212.4|B0212.4a	164	183	1.1203	0.095	0.201
B0212.4|B0212.4|B0212.4b	154	170	1.1013	0.241	0.436
B0212.4|B0212.4|B0212.4c	176	192	1.0952	0.168	0.325
B0212.6|B0212.6|B0212.6	29	38.6	1.3307	0.00414	0.0124
B0212.7|B0212.7	0	0.715	Inf	0.487	0.746
B0212.8|B0212.8	0	0	NaN	NA	NA
B0212.9|B0212.9	0	0	NaN	NA	NA
B0212.t1|B0212.t1	0	0.45	Inf	0.843	1
B0213.18|B0213.18	0.727	0.93	1.2795	1	1
B0213.21|B0213.21	0	0	NaN	NA	NA
B0213.22|B0213.22	0.131	0.698	5.3371	0.861	1
B0213.23|B0213.23	0	0	NaN	NA	NA
B0213.24|B0213.24	5.28	6.26	1.1865	0.939	1
B0213.25|B0213.25	0	0	NaN	NA	NA
B0218.5|B0218.5|B0218.5	7.95	9.11	1.146	0.845	1
B0218.7|B0218.7|B0218.7	0.833	1.3	1.5567	0.537	0.798
B0222.10|B0222.10|B0222.10	1.84	3.18	1.7221	0.263	0.467
B0222.11|B0222.11|B0222.11	5.9	6.8	1.1533	0.755	0.996
B0222.14|B0222.14	0.456	1.35	2.958	0.607	0.872
B0222.1|B0222.1|B0222.1	34.8	30.5	0.8766	0.386	0.628
B0222.2|B0222.2|B0222.2	0.718	0.553	0.7697	0.725	0.973
B0222.3|B0222.3|B0222.3	237	255	1.0747	0.498	0.759
B0222.5|B0222.5|B0222.5	56.7	44.3	0.7815	0.000167	0.000628
B0222.9|B0222.9|B0222.9	616	524	0.851	0.816	1
B0228.1|B0228.1|B0228.1	94.9	80.8	0.8515	0.00919	0.0256
B0228.6|B0228.6|B0228.6	697	673	0.9653	0.0822	0.178
B0228.7|B0228.7|B0228.7	1580	1400	0.8835	3.24e-19	4.37e-18
B0228.8|B0228.8|B0228.8	1.25	1.59	1.2734	1	1
B0228.9|B0228.9|B0228.9	5.19	6.69	1.2874	0.649	0.912
B0228.t1|B0228.t1	0.392	0.638	1.6275	0.923	1
B0238.10|B0238.10|B0238.10	2770	3270	1.1806	1.08e-17	1.33e-16
B0238.11|B0238.11|B0238.11	4580	4140	0.9037	4.71e-22	7.41e-21
B0238.12|B0238.12|B0238.12	36.8	47.2	1.2846	0.00597	0.0173
B0238.13|B0238.13|B0238.13	193	183	0.9494	0.00155	0.00504
B0238.15|B0238.15|B0238.15	30.2	24.4	0.806	0.821	1
B0238.18|B0238.18	13.8	14.5	1.0509	0.506	0.768
B0238.1|B0238.1|B0238.1	449	407	0.9084	7.04e-06	3.17e-05
B0238.7|B0238.7|B0238.7	1.05	1.19	1.1292	1	1
B0238.9|B0238.9|B0238.9	1170	1180	1.0121	8.56e-06	3.81e-05
B0240.5|B0240.5	0	0.152	Inf	1	1
B0240.6|B0240.6	0.326	0	0	0.883	1
B0244.10|B0244.10|B0244.10	74.2	68	0.9164	0.366	0.605
B0244.11|B0244.11|B0244.11	0	0.292	Inf	1	1
B0244.13|B0244.13	4.42	3.95	0.8932	0.298	0.516
B0244.14|B0244.14	68	83.1	1.2217	1.38e-05	6.01e-05
B0244.4|B0244.4|B0244.4	5.65	3.35	0.5929	0.143	0.284
B0244.5|B0244.5|B0244.5	14.2	14.3	1.0045	0.973	1
B0244.6|B0244.6|B0244.6	35	32.7	0.9355	0.563	0.828
B0244.7|B0244.7|B0244.7	12.3	12.5	1.0219	0.702	0.954
B0244.9|B0244.9|B0244.9	0.695	3.44	4.9469	0.00215	0.00679
B0244.t1|B0244.t1	4.08	3.13	0.7658	0.587	0.852
B0244.t2|B0244.t2	0	0.152	Inf	1	1
B0244.t3|B0244.t3	0	0	NaN	NA	NA
B0250.11|B0250.11	21.2	22.1	1.0423	1	1
B0250.12|B0250.12	558	495	0.888	2.53e-14	2.46e-13
B0250.14|B0250.14	0	0	NaN	NA	NA
B0250.15|B0250.15	0.466	1.03	2.22	0.512	0.774
B0250.16|B0250.16	0.335	0.294	0.8779	1	1
B0250.17|B0250.17	0.282	0	0	0.901	1
B0250.2|B0250.2|B0250.2	312	340	1.0884	0.265	0.47
B0250.3|B0250.3	2540	2380	0.9397	1.59e-49	6.83e-48
B0250.4|B0250.4|B0250.4	789	739	0.9369	0.688	0.941
B0250.5|B0250.5|B0250.5	985	933	0.9475	6.22e-05	0.000248
B0250.7|B0250.7	69.8	71.7	1.0269	0.182	0.346
B0250.8|B0250.8|B0250.8	7.52	7.38	0.9817	0.39	0.634
B0252.1|B0252.1|B0252.1	80.2	66.1	0.8243	0.357	0.595
B0252.3|B0252.3|B0252.3a	522	525	1.0052	0.794	1
B0252.3|B0252.3|B0252.3b	298	283	0.9506	0.652	0.914
B0252.3|B0252.3|B0252.3c	261	262	1.0053	0.86	1
B0252.5|B0252.5|B0252.5	6.2	4.96	0.8007	0.375	0.616
B0252.8|B0252.8|B0252.8	21.6	18.7	0.8634	0.42	0.671
B0261.1|B0261.1|B0261.1	2160	2160	1.0009	9.32e-05	0.000363
B0261.4|B0261.4|B0261.4a	719	722	1.004	0.87	1
B0261.4|B0261.4|B0261.4b	641	646	1.0067	0.724	0.971
B0261.5|B0261.5|B0261.5	1.25	2.86	2.296	0.125	0.254
B0261.6|B0261.6|B0261.6a	4.67	3.99	0.8532	1	1
B0261.6|B0261.6|B0261.6b	5.52	5.43	0.9838	0.823	1
B0261.7|B0261.7|B0261.7	838	761	0.9087	0.29	0.504
B0261.8|B0261.8|B0261.8	656	616	0.9391	0.00146	0.00475
B0261.9|B0261.9|B0261.9	6.04	3.05	0.5052	0.0452	0.106
B0272.3|B0272.3|B0272.3	3140	3270	1.0432	0.259	0.461
B0272.4|B0272.4|B0272.4	741	718	0.9692	0.102	0.214
B0273.111|B0273.111	0	0	NaN	NA	NA
B0273.112|B0273.112	1.94	4.19	2.1532	0.0497	0.115
B0273.113|B0273.113	0	0	NaN	NA	NA
B0273.114|B0273.114	0	0.36	Inf	0.956	1
B0273.1|B0273.1|B0273.1	36.6	36.2	0.9888	0.85	1
B0273.3|B0273.3|B0273.3	223	170	0.7616	1.32e-12	1.12e-11
B0280.11|B0280.11|B0280.11	4.23	4.65	1.1012	0.912	1
B0280.13|B0280.13|B0280.13	393	432	1.0991	3.8e-07	1.97e-06
B0280.17|B0280.17|B0280.17	138	130	0.9416	0.0298	0.0733
B0280.19|B0280.19	0.151	0	0	0.956	1
B0280.20|B0280.20	0.151	0	0	0.956	1
B0280.2|B0280.2|B0280.2	47.2	58.2	1.2312	0.00215	0.0068
B0280.6|B0280.6	261	295	1.1296	7.92e-07	3.98e-06
B0280.7|B0280.7|B0280.7	174	187	1.0747	0.151	0.297
B0280.9|B0280.9|B0280.9	1200	1090	0.91	1.08e-05	4.79e-05
B0281.1|B0281.1|B0281.1	0.367	0.908	2.4718	0.655	0.915
B0281.3|B0281.3|B0281.3	18.2	15.9	0.8725	0.454	0.708
B0281.4|B0281.4|B0281.4	36.9	28	0.7577	0.0702	0.155
B0281.5|B0281.5|B0281.5a	1580	1270	0.8055	3.44e-37	1.01e-35
B0281.5|B0281.5|B0281.5b	1080	858	0.7913	9.48e-28	1.98e-26
B0281.6|B0281.6|B0281.6	68.6	41.4	0.6028	0.000627	0.00216
B0281.7|B0281.7	1.1	0.71	0.6479	0.267	0.473
B0281.8|B0281.8|B0281.8	1.7	0.36	0.2113	0.378	0.619
B0284.1|B0284.1|B0284.1	80	93.8	1.1723	6.95e-06	3.14e-05
B0284.2|B0284.2|B0284.2	88.6	86.1	0.9717	0.752	0.993
B0284.3|B0284.3|B0284.3	311	292	0.9391	0.0192	0.0498
B0284.4|B0284.4|B0284.4	4.82	2.91	0.6037	0.43	0.682
B0284.5|B0284.5	6.26	9.26	1.4797	0.197	0.371
B0284.6|B0284.6	32	28.2	0.8804	0.0144	0.0385
B0284.7|B0284.7	0	0	NaN	NA	NA
B0285.11|B0285.11	16.5	20.2	1.225	0.724	0.972
B0285.12|B0285.12	33.7	26	0.7711	0.0548	0.125
B0285.14|B0285.14	0.131	0.147	1.1251	1	1
B0285.15|B0285.15	1.01	1.14	1.1311	1	1
B0285.16|B0285.16	1.26	4.2	3.3272	0.00431	0.0128
B0285.3|B0285.3|B0285.3	565	579	1.0256	0.000421	0.00149
B0285.4|B0285.4|B0285.4	1090	909	0.8319	4.33e-27	8.74e-26
B0285.6|B0285.6|B0285.6	38	29.6	0.7779	0.377	0.618
B0285.t1|B0285.t1	0	0.113	Inf	1	1
B0286.1|B0286.1|B0286.1	560	611	1.0909	6.51e-07	3.3e-06
B0286.3|B0286.3|B0286.3	305	362	1.1861	0.0021	0.00665
B0286.8|B0286.8	0.564	0.593	1.0508	1	1
B0286.9|B0286.9	0.564	0.593	1.0508	1	1
B0294.1|B0294.1|B0294.1	15.5	22.3	1.4336	0.143	0.285
B0294.3|B0294.3|B0294.3	2.35	1.9	0.8116	0.411	0.659
B0302.2|B0302.2|B0302.2	25.7	17.5	0.6817	0.231	0.422
B0302.4|B0302.4|B0302.4	10.6	12.6	1.1901	1	1
B0302.5|B0302.5|B0302.5	232	275	1.1827	0.017	0.0445
B0302.7|B0302.7	2.76	0.886	0.3209	0.87	1
B0303.11|B0303.11|B0303.11	269	316	1.1747	5.42e-05	0.000218
B0303.14|B0303.14|B0303.14	816	640	0.7842	1.02e-07	5.65e-07
B0303.15|B0303.15|B0303.15	717	680	0.9473	0.278	0.489
B0303.16|B0303.16|B0303.16	6.68	3.44	0.5151	0.283	0.495
B0303.17|B0303.17	0	0	NaN	NA	NA
B0303.2|B0303.2|B0303.2	650	621	0.9549	8.15e-06	3.65e-05
B0303.3|B0303.3|B0303.3	9320	9910	1.0636	0.00568	0.0165
B0303.4|B0303.4|B0303.4	3180	3330	1.048	6.3e-09	3.94e-08
B0303.7|B0303.7|B0303.7a	996	902	0.9058	5.62e-10	3.89e-09
B0303.7|B0303.7|B0303.7b	977	913	0.9341	9.37e-07	4.67e-06
B0304.10|B0304.10	0.142	0.152	1.0675	1	1
B0304.2|B0304.2|B0304.2	411	319	0.7772	1.89e-05	8.07e-05
B0304.4|B0304.4|B0304.4	267	215	0.8045	1.17e-05	5.15e-05
B0310.10|B0310.10	0.76	2.33	3.0723	0.013	0.0349
B0310.11|B0310.11	2.46	2.37	0.9628	0.65	0.913
B0310.12|B0310.12	0.76	2.33	3.0723	0.013	0.0349
B0310.1|B0310.1|B0310.1a	247	291	1.1769	0.00028	0.00102
B0310.1|B0310.1|B0310.1b	304	376	1.2349	2.8e-08	1.64e-07
B0310.2|B0310.2|B0310.2	1860	1660	0.8932	0.00162	0.00524
B0310.3|B0310.3|B0310.3	18.5	12.8	0.6913	1	1
B0310.6|B0310.6|B0310.6	48.5	43.4	0.8945	0.339	0.572
B0310.7|B0310.7	1.25	0	0	0.511	0.772
B0310.8|B0310.8	0.282	0.294	1.0429	1	1
B0310.9|B0310.9	1.25	0	0	0.511	0.772
B0331.2|B0331.2|B0331.2	19.8	14.6	0.7359	0.314	0.538
B0334.10|B0334.10|B0334.10	11.2	10.3	0.9218	0.546	0.808
B0334.12|B0334.12	0.784	0.299	0.3808	0.482	0.741
B0334.13|B0334.13|B0334.13	163	166	1.0149	0.109	0.226
B0334.15|B0334.15|B0334.15	5110	5080	0.9945	1.16e-09	7.78e-09
B0334.16|B0334.16	0	0	NaN	NA	NA
B0334.17|B0334.17	0.617	0.405	0.657	0.752	0.994
B0334.18|B0334.18	0	0.299	Inf	0.983	1
B0334.19|B0334.19	0.697	0.593	0.8508	0.912	1
B0334.3|B0334.3|B0334.3a	4160	4740	1.1399	1.72e-09	1.14e-08
B0334.3|B0334.3|B0334.3b	2120	2400	1.1317	8.84e-05	0.000346
B0334.4|B0334.4|B0334.4	1200	1010	0.8489	5.98e-22	9.39e-21
B0334.5|B0334.5|B0334.5	4910	4880	0.9947	1.53e-08	9.22e-08
B0334.6|B0334.6|B0334.6	294	241	0.819	4.01e-10	2.83e-09
B0334.9|B0334.9	3.69	2.66	0.722	0.763	1
B0336.11|B0336.11|B0336.11a	487	520	1.0692	0.0322	0.0786
B0336.11|B0336.11|B0336.11b	86	88.4	1.028	0.061	0.137
B0336.12|B0336.12|B0336.12	1.21	2.18	1.7923	0.401	0.647
B0336.13|B0336.13|B0336.13	808	702	0.869	5.56e-09	3.5e-08
B0336.14|B0336.14	2.12	0.74	0.3495	0.466	0.724
B0336.15|B0336.15	2.12	0.74	0.3495	0.466	0.724
B0336.16|B0336.16	4.29	1.09	0.2551	0.0304	0.0747
B0336.3|B0336.3|B0336.3	4220	4410	1.0449	1.15e-08	7.01e-08
B0336.5|B0336.5|B0336.5a	653	607	0.9288	0.0784	0.17
B0336.5|B0336.5|B0336.5b	666	612	0.9189	0.0437	0.103
B0336.7|B0336.7|B0336.7a	645	552	0.8552	1.33e-07	7.22e-07
B0336.7|B0336.7|B0336.7b	1280	1100	0.8572	8.68e-14	8.1e-13
B0344.1|B0344.1	303	291	0.9576	2.51e-06	1.19e-05
B0344.3|B0344.3	1.9	1.78	0.934	0.517	0.778
B0344.4|B0344.4	1.9	1.78	0.934	0.517	0.778
B0344.5|B0344.5	2.04	1.78	0.8691	0.396	0.641
B0344.t1|B0344.t1	1.77	1.78	1.003	0.66	0.915
B0344.t2|B0344.t2	1.77	1.78	1.003	0.66	0.915
B0344.t3|B0344.t3	1.77	1.78	1.003	0.66	0.915
B0348.1|B0348.1|B0348.1	1.92	1.37	0.715	0.511	0.772
B0348.2|B0348.2|B0348.2	19.4	13.3	0.6871	0.00134	0.00439
B0348.5|B0348.5|B0348.5	104	121	1.1595	0.0932	0.198
B0350.3|B0350.3|B0350.3	0.326	0	0	0.883	1
B0350.67|B0350.67	0	0.441	Inf	0.851	1
B0350.68|B0350.68	0.303	0.564	1.8643	1	1
B0350.69|B0350.69	0	0	NaN	NA	NA
B0350.70|B0350.70	0	0.113	Inf	1	1
B0350.71|B0350.71	0.282	0.677	2.3988	0.766	1
B0350.72|B0350.72	0	0.209	Inf	1	1
B0350.73|B0350.73	1.65	1.65	0.998	0.66	0.915
B0350.74|B0350.74	3.71	2.54	0.6834	0.757	0.997
B0350.75|B0350.75	0	0	NaN	NA	NA
B0350.76|B0350.76	2.13	0.971	0.4554	0.0844	0.182
B0350.77|B0350.77	0.282	0.441	1.5643	1	1
B0350.78|B0350.78	0.142	0.924	6.5048	0.405	0.652
B0350.79|B0350.79	0.403	1.58	3.9066	0.0851	0.183
B0350.80|B0350.80	0.282	0.147	0.5214	0.954	1
B0350.81|B0350.81	0	0.152	Inf	1	1
B0350.82|B0350.82	0.303	0.209	0.6892	0.953	1
B0350.83|B0350.83	2.66	1.62	0.61	0.398	0.644
B0350.84|B0350.84	0	0.441	Inf	0.851	1
B0350.t1|B0350.t1	0.837	0.733	0.876	0.678	0.932
B0353.1|B0353.1|B0353.1a	501	618	1.2338	1.19e-06	5.89e-06
B0353.1|B0353.1|B0353.1b	492	609	1.2371	1.73e-06	8.4e-06
B0353.2|B0353.2	0	0	NaN	NA	NA
B0361.11|B0361.11|B0361.11	6.24	5.74	0.9188	0.989	1
B0361.2|B0361.2|B0361.2a	1140	933	0.8191	0.000121	0.000465
B0361.2|B0361.2|B0361.2b	269	176	0.6537	5.86e-10	4.05e-09
B0361.3|B0361.3|B0361.3	2420	2110	0.8725	2.25e-11	1.75e-10
B0361.4|B0361.4|B0361.4	56.2	55.3	0.9833	0.711	0.96
B0361.6|B0361.6|B0361.6	924	700	0.7572	3.52e-23	5.87e-22
B0361.8|B0361.8|B0361.8	2260	2220	0.982	0.31	0.532
B0361.9|B0361.9|B0361.9	480	396	0.8246	1.03e-07	5.7e-07
B0365.1|B0365.1|B0365.1	765	949	1.2411	7.34e-17	8.54e-16
B0365.2|B0365.2	1.15	1.36	1.1876	1	1
B0365.7|B0365.7|B0365.7	96.6	122	1.2623	2.32e-08	1.37e-07
B0365.8|B0365.8	0	0	NaN	NA	NA
B0379.10|B0379.10	0	0	NaN	NA	NA
B0379.11|B0379.11	156	189	1.2142	3.66e-11	2.79e-10
B0379.1|B0379.1	150	127	0.8485	0.000816	0.00277
B0379.1|B0379.1|B0379.1a	199	165	0.831	5.43e-05	0.000219
B0379.2|B0379.2|B0379.2	1.46	1.28	0.8762	0.198	0.373
B0379.6|B0379.6|B0379.6	0	0.677	Inf	0.524	0.786
B0379.7|B0379.7|B0379.7	2.97	3.44	1.1566	0.882	1
B0379.8|B0379.8	0.184	0	0	0.956	1
B0379.9|B0379.9	0	0.373	Inf	0.902	1
B0391.10|B0391.10|B0391.10	105	112	1.0708	0.00121	0.00401
B0391.13|B0391.13	0	0	NaN	NA	NA
B0391.1|B0391.1	0	0.553	Inf	0.76	1
B0391.3|B0391.3|B0391.3	0.151	0	0	0.956	1
B0391.8|B0391.8	259	201	0.7774	2.06e-06	9.94e-06
B0393.10|B0393.10	2.65	0	0	0.0489	0.113
B0393.11|B0393.11	0	0	NaN	NA	NA
B0393.12|B0393.12	0.433	0	0	0.768	1
B0393.13|B0393.13	0.131	0	0	0.956	1
B0393.14|B0393.14	1.32	3.02	2.2939	0.107	0.222
B0393.15|B0393.15	0.142	0.292	2.0582	1	1
B0393.16|B0393.16	0	0	NaN	NA	NA
B0393.3|B0393.3|B0393.3	2910	2870	0.9863	8.85e-06	3.93e-05
B0393.4|B0393.4|B0393.4	5	6.85	1.3682	0.387	0.629
B0393.5|B0393.5|B0393.5	1950	2410	1.239	6.72e-47	2.68e-45
B0393.6|B0393.6|B0393.6	643	659	1.0252	0.000381	0.00136
B0393.7|B0393.7|B0393.7	10.6	6.47	0.6109	0.0197	0.051
B0393.8|B0393.8|B0393.8	388	349	0.9009	1.18e-06	5.81e-06
B0393.9|B0393.9|B0393.9a	109	96.5	0.8863	0.0376	0.09
B0393.9|B0393.9|B0393.9b	120	110	0.9134	0.111	0.229
B0395.10|B0395.10	0.587	1.37	2.3366	0.246	0.442
B0395.3|B0395.3|B0395.3	3790	4130	1.0878	0.00238	0.00746
B0395.7|B0395.7	0.827	0.994	1.2012	1	1
B0395.8|B0395.8	0	0	NaN	NA	NA
B0395.9|B0395.9	0	0	NaN	NA	NA
B0395.t1|B0395.t1	0.587	1.26	2.1438	0.35	0.585
B0399.3|B0399.3	0	0	NaN	NA	NA
B0399.t10|B0399.t10	0.131	0.147	1.1251	1	1
B0399.t11|B0399.t11	0	0	NaN	NA	NA
B0399.t12|B0399.t12	0.142	0	0	0.956	1
B0399.t13|B0399.t13	0	0	NaN	NA	NA
B0399.t14|B0399.t14	0	0	NaN	NA	NA
B0399.t15|B0399.t15	0	0	NaN	NA	NA
B0399.t16|B0399.t16	0	0	NaN	NA	NA
B0399.t1|B0399.t1	0	0	NaN	NA	NA
B0399.t2|B0399.t2	0	0	NaN	NA	NA
B0399.t3|B0399.t3	0	0	NaN	NA	NA
B0399.t4|B0399.t4	0	0.209	Inf	1	1
B0399.t5|B0399.t5	0	0	NaN	NA	NA
B0399.t6|B0399.t6	0	0.147	Inf	1	1
B0399.t7|B0399.t7	0	0.113	Inf	1	1
B0399.t8|B0399.t8	0.131	0	0	0.956	1
B0399.t9|B0399.t9	0	0	NaN	NA	NA
B0403.10|B0403.10	0	0	NaN	NA	NA
B0403.11|B0403.11	0.617	0.947	1.5339	1	1
B0403.12|B0403.12	0.142	0.446	3.1392	0.934	1
B0403.13|B0403.13	0.142	0.446	3.1392	0.934	1
B0403.14|B0403.14	0	0	NaN	NA	NA
B0403.3|B0403.3|B0403.3	18.6	18	0.9668	0.606	0.872
B0403.5|B0403.5|B0403.5	597	770	1.29	2.28e-15	2.41e-14
B0403.6|B0403.6|B0403.6	38.1	38.2	1.0041	0.914	1
B0403.7|B0403.7	0	0	NaN	NA	NA
B0403.8|B0403.8	0	0	NaN	NA	NA
B0403.9|B0403.9	2.26	4.92	2.1722	0.0646	0.144
B0410.1|B0410.1|B0410.1	2.71	3.32	1.2284	0.263	0.467
B0410.3|B0410.3|B0410.3	312	403	1.292	1.54e-05	6.66e-05
B0410.4|B0410.4	0.282	0.113	0.4013	0.955	1
B0412.3|B0412.3|B0412.3	4350	4510	1.0379	5.89e-08	3.33e-07
B0412.6|B0412.6	1.35	1.57	1.1617	1	1
B0412.7|B0412.7	2.92	2.75	0.9416	0.895	1
B0414.10|B0414.10	0.151	0	0	0.956	1
B0414.11|B0414.11	0	0.299	Inf	0.983	1
B0414.12|B0414.12	0	0	NaN	NA	NA
B0416.1|B0416.1|B0416.1	1080	1230	1.1414	2.61e-16	2.94e-15
B0416.2|B0416.2|B0416.2	0.456	0.417	0.9141	0.942	1
B0416.3|B0416.3|B0416.3	21.6	20	0.9276	0.92	1
B0416.4|B0416.4|B0416.4	395	275	0.6968	1.44e-12	1.22e-11
B0416.5|B0416.5|B0416.5a	4270	4250	0.9971	0.000378	0.00135
B0416.5|B0416.5|B0416.5b	2950	3000	1.0191	0.121	0.247
B0416.7|B0416.7|B0416.7a	7.44	6.05	0.813	0.146	0.29
B0416.7|B0416.7|B0416.7b	8.75	6.47	0.7392	0.12	0.246
B0416.8|B0416.8	0.968	1.46	1.509	0.778	1
B0416.9|B0416.9	0.988	2.18	2.2056	0.106	0.22
B0432.10|B0432.10|B0432.10	1280	1100	0.8552	3.14e-15	3.29e-14
B0432.11|B0432.11|B0432.11	0.424	1.45	3.4097	0.131	0.263
B0432.13|B0432.13|B0432.13	2000	1860	0.9275	0.272	0.481
B0432.14|B0432.14|B0432.14	31.5	39.6	1.2565	0.0575	0.131
B0432.16|B0432.16	0.151	0	0	0.956	1
B0432.17|B0432.17	0.142	0	0	0.956	1
B0432.18|B0432.18	0.151	0	0	0.956	1
B0432.19|B0432.19	0.617	0.152	0.2456	0.66	0.915
B0432.1|B0432.1|B0432.1	30.1	23.2	0.7729	0.278	0.488
B0432.6|B0432.6|B0432.6	559	539	0.9641	0.785	1
B0432.7|B0432.7|B0432.7	761	831	1.092	1.73e-09	1.15e-08
B0432.8|B0432.8|B0432.8	245	221	0.9001	0.0907	0.193
B0432.9|B0432.9|B0432.9	637	611	0.959	0.186	0.353
B0454.12|B0454.12	0	0	NaN	NA	NA
B0454.13|B0454.13	0.151	0.294	1.9436	1	1
B0454.14|B0454.14	0	0	NaN	NA	NA
B0454.15|B0454.15	0	0.147	Inf	1	1
B0454.16|B0454.16	0	0	NaN	NA	NA
B0454.17|B0454.17	0	0	NaN	NA	NA
B0454.18|B0454.18	0.697	1.33	1.9139	0.707	0.957
B0454.19|B0454.19	0	0	NaN	NA	NA
B0454.20|B0454.20	0	0.113	Inf	1	1
B0454.21|B0454.21	0	0	NaN	NA	NA
B0454.22|B0454.22	0	0.113	Inf	1	1
B0454.23|B0454.23	0	0	NaN	NA	NA
B0454.24|B0454.24	0	0	NaN	NA	NA
B0454.25|B0454.25	0	0	NaN	NA	NA
B0454.5|B0454.5|B0454.5	21.7	18.4	0.8467	0.187	0.354
B0454.6|B0454.6|B0454.6	282	418	1.4811	3.61e-22	5.72e-21
B0454.8|B0454.8|B0454.8	163	227	1.3965	9.34e-12	7.49e-11
B0454.9|B0454.9|B0454.9	849	846	0.9964	0.00194	0.00618
B0457.10|B0457.10	0.142	0.113	0.7973	1	1
B0457.11|B0457.11	0	0.147	Inf	1	1
B0457.12|B0457.12	0.131	0.554	4.2413	0.806	1
B0457.13|B0457.13	0	0.294	Inf	0.985	1
B0457.14|B0457.14	0.131	0	0	0.956	1
B0457.15|B0457.15	0.142	0.113	0.7973	1	1
B0457.16|B0457.16	15	25.7	1.7172	1.53e-08	9.25e-08
B0457.17|B0457.17	0	0	NaN	NA	NA
B0457.18|B0457.18	0.424	0.226	0.5339	0.949	1
B0457.19|B0457.19	13.1	20.7	1.575	0.00353	0.0107
B0457.2|B0457.2|B0457.2	185	131	0.7085	3.74e-18	4.75e-17
B0457.3|B0457.3	0.424	0.815	1.9213	0.74	0.985
B0457.4|B0457.4|B0457.4	0.902	2.32	2.5785	0.123	0.251
B0457.6|B0457.6|B0457.6	236	275	1.1656	0.212	0.394
B0457.8|B0457.8	0	0.113	Inf	1	1
B0457.9|B0457.9	0.142	0.294	2.0717	1	1
B0462.1|B0462.1|B0462.1	49.8	44	0.8823	0.585	0.85
B0462.4|B0462.4|B0462.4	103	108	1.0547	0.0386	0.0922
B0462.5|B0462.5|B0462.5	5.83	6.96	1.1929	0.749	0.991
B0464.2|B0464.2|B0464.2a	4140	3480	0.8404	4.34e-22	6.85e-21
B0464.2|B0464.2|B0464.2b	446	554	1.2425	9.96e-18	1.23e-16
B0464.2|B0464.2|B0464.2c	4330	3630	0.8383	6.22e-25	1.13e-23
B0464.2|B0464.2|B0464.2d	396	496	1.2518	2.3e-14	2.25e-13
B0464.6|B0464.6|B0464.6	6890	6460	0.9382	0.00503	0.0148
B0464.9|B0464.9|B0464.9	754	743	0.985	0.347	0.581
B0478.23|B0478.23	0.131	0	0	0.956	1
B0478.24|B0478.24	0	0.147	Inf	1	1
B0478.25|B0478.25	0	0	NaN	NA	NA
B0478.26|B0478.26	0.131	0	0	0.956	1
B0478.3|B0478.3|B0478.3	53.8	52.6	0.9792	0.773	1
B0491.10|B0491.10	0.142	0.373	2.6305	0.956	1
B0491.11|B0491.11	0.131	0.226	1.732	1	1
B0491.1|B0491.1|B0491.1	771	771	1.0003	0.401	0.647
B0491.5|B0491.5|B0491.5	8290	8470	1.0217	0.00337	0.0102
B0491.6|B0491.6|B0491.6a	1180	1190	1.011	0.364	0.604
B0491.6|B0491.6|B0491.6b	1150	1150	0.9984	0.842	1
B0491.7|B0491.7|B0491.7	969	820	0.8465	6.72e-24	1.15e-22
B0491.9|B0491.9	0.543	0.994	1.8284	0.895	1
B0491.t1|B0491.t1	0.131	0.226	1.732	1	1
B0491.t2|B0491.t2	0.131	0.226	1.732	1	1
B0495.11|B0495.11	0.142	0	0	0.956	1
B0495.12|B0495.12	0	0	NaN	NA	NA
B0495.13|B0495.13	0.131	0.469	3.5869	0.93	1
B0495.14|B0495.14	0	0.147	Inf	1	1
B0495.15|B0495.15	2.97	4.36	1.4707	0.699	0.95
B0495.16|B0495.16	0.282	0.147	0.5214	0.954	1
B0495.17|B0495.17	0	0	NaN	NA	NA
B0495.18|B0495.18	0.151	0.469	3.0982	0.924	1
B0495.19|B0495.19	2.08	1.88	0.9028	0.516	0.778
B0495.20|B0495.20	0.335	0.521	1.5537	0.915	1
B0495.21|B0495.21	0.131	0.469	3.5869	0.93	1
B0495.22|B0495.22	0.131	0	0	0.956	1
B0495.2|B0495.2|B0495.2	2020	1850	0.9135	0.917	1
B0495.5|B0495.5|B0495.5	1710	1460	0.8517	2.43e-13	2.2e-12
B0495.6|B0495.6|B0495.6	292	269	0.9198	0.0105	0.0288
B0495.7|B0495.7|B0495.7	10900	11000	1.0143	0.000173	0.000649
B0495.8|B0495.8|B0495.8a	2770	2480	0.8958	3.89e-06	1.81e-05
B0495.8|B0495.8|B0495.8b	1460	1350	0.9249	0.0991	0.208
B0495.9|B0495.9|B0495.9	748	663	0.8861	1.95e-08	1.17e-07
B0496.11|B0496.11|B0496.11	0.629	0.817	1.2996	1	1
B0496.12|B0496.12	0	0	NaN	NA	NA
B0496.13|B0496.13	0.761	1.83	2.4003	0.144	0.287
B0496.14|B0496.14	0.738	0.564	0.7641	0.717	0.965
B0496.15|B0496.15	0	0	NaN	NA	NA
B0496.16|B0496.16	0.654	0.738	1.129	0.905	1
B0496.17|B0496.17	1.69	0.851	0.5021	1	1
B0496.18|B0496.18	1.01	0.706	0.6998	0.658	0.915
B0496.19|B0496.19	0.131	0.26	1.9911	1	1
B0496.1|B0496.1|B0496.1	8.74	8.2	0.9384	0.482	0.741
B0496.2|B0496.2|B0496.2	102	90.2	0.8827	0.0109	0.0299
B0496.6|B0496.6|B0496.6	4.93	4.64	0.9423	0.37	0.609
B0507.10|B0507.10|B0507.10	30.3	72.4	2.3897	1.27e-22	2.06e-21
B0507.13|B0507.13	0	0	NaN	NA	NA
B0507.14|B0507.14	1.34	1.52	1.1327	1	1
B0507.1|B0507.1|B0507.1	970	1160	1.192	1.05e-08	6.44e-08
B0507.2|B0507.2|B0507.2	707	754	1.0672	0.00594	0.0172
B0507.3|B0507.3|B0507.3a	354	327	0.9252	0.793	1
B0507.3|B0507.3|B0507.3b	338	313	0.9252	0.864	1
B0507.4|B0507.4|B0507.4	0.619	0.439	0.7097	0.742	0.987
B0507.5|B0507.5|B0507.5	0.314	0.113	0.36	0.954	1
B0507.6|B0507.6|B0507.6	14.5	22.2	1.5308	3.79e-06	1.77e-05
B0507.7|B0507.7|B0507.7	12.5	20	1.6004	0.18	0.343
B0507.8|B0507.8|B0507.8	20.1	25.4	1.268	0.0108	0.0297
B0507.9|B0507.9|B0507.9	4	3.72	0.9298	0.283	0.495
B0511.11|B0511.11|B0511.11	103	142	1.3808	2.1e-14	2.06e-13
B0511.12|B0511.12|B0511.12	3540	3640	1.0264	0.029	0.0715
B0511.13|B0511.13|B0511.13	982	779	0.7933	2.68e-15	2.82e-14
B0511.14|B0511.14|B0511.14a	883	876	0.993	0.957	1
B0511.14|B0511.14|B0511.14b	692	661	0.9559	0.609	0.874
B0511.15|B0511.15	0.403	0.817	2.0258	0.895	1
B0511.16|B0511.16	3.63	12.8	3.5405	8.64e-08	4.81e-07
B0511.2|B0511.2|B0511.2	141	115	0.8165	0.0921	0.196
B0511.6|B0511.6|B0511.6	7350	7400	1.0061	0.521	0.782
B0511.7|B0511.7|B0511.7	1140	952	0.8377	1.61e-19	2.22e-18
B0513.11|B0513.11	1.28	0.563	0.44	0.78	1
B0513.12|B0513.12	141	132	0.9345	0.17	0.328
B0513.2|B0513.2|B0513.2a	1860	1660	0.8926	0.00144	0.00469
B0513.2|B0513.2|B0513.2b	1670	1520	0.9084	0.0553	0.126
B0513.4|B0513.4|B0513.4a	16.2	21.3	1.3094	0.124	0.252
B0513.4|B0513.4|B0513.4b	3.79	3.81	1.0077	0.867	1
B0513.5|B0513.5|B0513.5	477	447	0.9378	0.000723	0.00247
B0513.6|B0513.6|B0513.6	35.7	20.7	0.58	0.0179	0.0467
B0513.7|B0513.7	338	383	1.1336	0.0234	0.0591
B0513.9|B0513.9|B0513.9a	40.7	24.5	0.602	0.00017	0.00064
B0513.9|B0513.9|B0513.9b	90.5	56.7	0.6267	2.1e-07	1.12e-06
B0513.t1|B0513.t1	0.131	0	0	0.956	1
B0523.6|B0523.6	0	0	NaN	NA	NA
B0524.2|B0524.2|B0524.2	1.56	0.643	0.4114	1	1
B0524.3|B0524.3|B0524.3	6.47	4.57	0.7064	0.904	1
B0524.4|B0524.4|B0524.4	2.18	3.12	1.4298	0.401	0.647
B0524.5|B0524.5|B0524.5	0.77	0.294	0.3818	0.598	0.865
B0524.6|B0524.6|B0524.6	464	470	1.0134	0.0363	0.0873
B0524.7|B0524.7	0.284	0.209	0.7346	0.954	1
B0524.8|B0524.8	0.284	0.209	0.7346	0.954	1
B0524.9|B0524.9	0	0	NaN	NA	NA
B0545.4|B0545.4|B0545.4	24.1	22.7	0.9397	0.676	0.93
B0546.2|B0546.2|B0546.2	3080	3050	0.9882	0.0667	0.148
B0546.3|B0546.3|B0546.3	554	734	1.3254	1.71e-18	2.21e-17
B0546.4|B0546.4|B0546.4a	667	715	1.0724	0.0526	0.121
B0546.4|B0546.4|B0546.4b	640	675	1.0546	0.156	0.306
B0546.5|B0546.5|B0546.5	12.4	10.7	0.8661	0.703	0.954
B0547.2|B0547.2|B0547.2	0	0	NaN	NA	NA
B0547.34|B0547.34	0	0	NaN	NA	NA
B0554.1|B0554.1|B0554.1	2.2	2.7	1.2261	0.516	0.778
B0554.2|B0554.2|B0554.2	2.14	1.07	0.5004	0.196	0.369
B0554.3|B0554.3|B0554.3	0	0.147	Inf	1	1
B0554.4|B0554.4|B0554.4	2.41	5.2	2.1615	0.121	0.246
B0554.5|B0554.5|B0554.5	3.49	2.65	0.759	0.152	0.299
B0554.7|B0554.7|B0554.7	32.2	23	0.7158	0.0238	0.06
B0563.10|B0563.10|B0563.10	2.17	0.416	0.1918	0.17	0.328
B0563.12|B0563.12	0	0	NaN	NA	NA
B0563.13|B0563.13	0	0	NaN	NA	NA
B0563.14|B0563.14	0.131	0.469	3.5869	0.93	1
B0563.15|B0563.15	0.303	0	0	0.893	1
B0563.16|B0563.16	0.131	0.292	2.2355	1	1
B0563.17|B0563.17	0.131	0.469	3.5869	0.93	1
B0563.1|B0563.1|B0563.1	175	115	0.6551	0.0312	0.0764
B0563.5|B0563.5|B0563.5	3.52	6.18	1.7552	0.305	0.526
B0563.6|B0563.6|B0563.6a	178	183	1.0311	0.561	0.825
B0563.6|B0563.6|B0563.6b	320	338	1.0545	0.934	1
B0563.6|B0563.6|B0563.6c	156	170	1.0891	0.318	0.544
B0563.7|B0563.7|B0563.7	29.8	37.4	1.2584	0.0247	0.0618
B0563.8|B0563.8|B0563.8	93.1	69	0.741	0.0478	0.111
B0563.9|B0563.9|B0563.9	3.68	0.899	0.2444	0.362	0.601
B0564.11|B0564.11|B0564.11	1250	1230	0.9802	0.421	0.673
B0564.2|B0564.2|B0564.2	246	190	0.7711	3.86e-09	2.47e-08
B0564.3|B0564.3|B0564.3	208	219	1.0493	0.993	1
B0564.4|B0564.4|B0564.4	22.1	20.1	0.9086	0.413	0.662
B0564.6|B0564.6|B0564.6a	365	437	1.1982	1.17e-05	5.16e-05
B0564.6|B0564.6|B0564.6b	359	431	1.1997	2.12e-05	9.03e-05
B0564.7|B0564.7|B0564.7	1820	1780	0.9788	0.49	0.75
B0564.9|B0564.9|B0564.9	365	437	1.1982	1.17e-05	5.16e-05
BE0003N10.1|BE0003N10.1|BE0003N10.1	503	491	0.9765	0.155	0.304
BE0003N10.3|BE0003N10.3|BE0003N10.3	1020	1230	1.2032	8.36e-11	6.19e-10
BE0003N10.4|BE0003N10.4	1.49	1.95	1.3125	1	1
BE0003N10.5|BE0003N10.5	1.49	2.06	1.3887	0.855	1
BE0003N10.t1|BE0003N10.t1	0	0	NaN	NA	NA
BE0003N10.t2|BE0003N10.t2	0.303	0.942	3.1131	0.529	0.79
BE0003N10.t3|BE0003N10.t3	0	0	NaN	NA	NA
BE0003N10.t4|BE0003N10.t4	0	0	NaN	NA	NA
BE0003N10.t5|BE0003N10.t5	0.151	0	0	0.956	1
BE0003N10.t6|BE0003N10.t6	0	0	NaN	NA	NA
BE10.1|BE10.1|BE10.1	1.03	1.56	1.5117	0.957	1
BE10.3|BE10.3|BE10.3	849	683	0.8049	8.51e-08	4.74e-07
BE10.4|BE10.4|BE10.4	84.8	55	0.6487	0.00685	0.0196
BE10.5|BE10.5|BE10.5	25.3	17.9	0.7089	0.129	0.259
BE10.6|BE10.6	1.74	1.4	0.8057	0.832	1
BE10.7|BE10.7	0.261	1.03	3.9484	0.4	0.646
C01A2.10|C01A2.10	10	12	1.1972	0.146	0.289
C01A2.1|C01A2.1|C01A2.1	579	447	0.772	0.629	0.894
C01A2.2|C01A2.2|C01A2.2a	518	568	1.0949	0.252	0.451
C01A2.2|C01A2.2|C01A2.2b	152	171	1.1267	0.152	0.299
C01A2.3|C01A2.3|C01A2.3	1600	1470	0.9231	7.28e-08	4.08e-07
C01A2.4|C01A2.4|C01A2.4	1230	1010	0.8225	5.84e-20	8.22e-19
C01A2.5|C01A2.5|C01A2.5	1840	1620	0.8807	6.88e-22	1.08e-20
C01A2.6|C01A2.6|C01A2.6	3.65	3.4	0.9307	1	1
C01A2.8|C01A2.8	0	0	NaN	NA	NA
C01A2.9|C01A2.9|C01A2.9	4.56	2.02	0.4427	0.052	0.12
C01B10.10|C01B10.10|C01B10.10	531	440	0.8282	1.3e-10	9.49e-10
C01B10.11|C01B10.11|C01B10.11	1870	2020	1.0833	0.0655	0.146
C01B10.3|C01B10.3|C01B10.3	76.8	53.3	0.694	1.26e-07	6.89e-07
C01B10.44|C01B10.44|C01B10.44	0.67	0.378	0.5641	0.93	1
C01B10.45|C01B10.45	4.38	5.07	1.1577	0.652	0.914
C01B10.46|C01B10.46	5.91	2.87	0.4856	0.0843	0.182
C01B10.47|C01B10.47	10.6	9.19	0.8672	0.546	0.808
C01B10.4|C01B10.4|C01B10.4	138	114	0.8271	0.000547	0.0019
C01B10.6|C01B10.6|C01B10.6a	1300	1530	1.1762	1.26e-05	5.52e-05
C01B10.6|C01B10.6|C01B10.6b	669	770	1.152	0.0101	0.0278
C01B10.7|C01B10.7|C01B10.7	0.184	0.303	1.65	1	1
C01B10.8|C01B10.8|C01B10.8	1720	1510	0.8779	1.32e-05	5.78e-05
C01B10.9|C01B10.9|C01B10.9	1010	840	0.8354	2.46e-11	1.9e-10
C01B12.10|C01B12.10	0.131	0.147	1.1251	1	1
C01B12.2|C01B12.2|C01B12.2	953	950	0.9971	0.626	0.891
C01B12.3|C01B12.3|C01B12.3	669	685	1.0246	0.487	0.746
C01B12.4|C01B12.4|C01B12.4	51	51.4	1.0075	0.387	0.63
C01B12.5|C01B12.5|C01B12.5	33.5	22.2	0.6637	0.000307	0.00111
C01B12.8|C01B12.8|C01B12.8	477	365	0.7646	1.12e-07	6.16e-07
C01B12.9|C01B12.9	149	125	0.8417	0.0052	0.0152
C01B4.2|C01B4.2	0.335	0.672	2.006	0.747	0.99
C01B4.6|C01B4.6|C01B4.6	379	404	1.0663	0.00221	0.00697
C01B4.7|C01B4.7|C01B4.7	145	360	2.4768	8.89e-118	1.29e-115
C01B4.8|C01B4.8|C01B4.8	32.4	43.9	1.3561	9.8e-05	0.00038
C01B4.9|C01B4.9|C01B4.9	350	604	1.7277	1.09e-97	1.14e-95
C01B7.10|C01B7.10	0.477	1.5	3.1375	0.131	0.263
C01B7.11|C01B7.11	1.13	1.89	1.6753	0.806	1
C01B7.12|C01B7.12	0	0	NaN	NA	NA
C01B7.13|C01B7.13	0	0	NaN	NA	NA
C01B7.14|C01B7.14	1.11	1.38	1.2448	0.978	1
C01B7.15|C01B7.15	0	0	NaN	NA	NA
C01B7.16|C01B7.16	0	0	NaN	NA	NA
C01B7.3|C01B7.3|C01B7.3	1.17	1.5	1.2787	0.651	0.913
C01B7.5|C01B7.5|C01B7.5	31.1	29.3	0.9417	0.723	0.97
C01B7.7|C01B7.7|C01B7.7	3.11	4.03	1.296	1	1
C01B7.8|C01B7.8	0.585	0.553	0.9449	0.926	1
C01B7.9|C01B7.9	0.697	0.557	0.7994	0.729	0.976
C01B9.1|C01B9.1|C01B9.1a	174	196	1.1274	0.000278	0.00101
C01B9.1|C01B9.1|C01B9.1b	185	208	1.129	9.33e-05	0.000364
C01B9.3|C01B9.3	2.04	3.18	1.5574	0.466	0.724
C01B9.4|C01B9.4|C01B9.4	8.34	8.1	0.9708	0.955	1
C01B9.5|C01B9.5	7.4	6.68	0.9026	0.219	0.404
C01B9.6|C01B9.6	0	0	NaN	NA	NA
C01C10.2|C01C10.2|C01C10.2a	131	150	1.1468	0.0643	0.144
C01C10.2|C01C10.2|C01C10.2b	193	209	1.0841	0.275	0.484
C01C10.5|C01C10.5	0	0	NaN	NA	NA
C01C4.2|C01C4.2|C01C4.2	2.77	4.73	1.7081	0.55	0.812
C01C4.3|C01C4.3|C01C4.3a	121	121	0.9955	0.0741	0.162
C01C4.3|C01C4.3|C01C4.3b	137	143	1.0418	0.031	0.076
C01C4.4|C01C4.4	0	0.152	Inf	1	1
C01C4.5|C01C4.5	0.142	0.292	2.0582	1	1
C01C4.6|C01C4.6	0	0.152	Inf	1	1
C01C4.7|C01C4.7	0	0	NaN	NA	NA
C01F1.1|C01F1.1|C01F1.1	1650	1630	0.9867	1.04e-05	4.62e-05
C01F1.3|C01F1.3|C01F1.3a	2030	2410	1.1912	3.57e-14	3.43e-13
C01F1.3|C01F1.3|C01F1.3b	553	566	1.0239	0.0213	0.0545
C01F1.4|C01F1.4|C01F1.4	66.4	78.5	1.1806	0.023	0.0581
C01F1.5|C01F1.5|C01F1.5	213	273	1.2785	0.000116	0.000447
C01F1.6|C01F1.6|C01F1.6	938	986	1.0518	0.223	0.41
C01F1.7|C01F1.7	0.151	0	0	0.956	1
C01F1.8|C01F1.8	0.857	0.891	1.0396	1	1
C01F4.4|C01F4.4	0	0	NaN	NA	NA
C01F4.5|C01F4.5	0	0	NaN	NA	NA
C01F4.6|C01F4.6	0.273	0.525	1.9253	0.927	1
C01F4.7|C01F4.7	0.293	0.147	0.5014	0.954	1
C01F4.8|C01F4.8	0	0	NaN	NA	NA
C01F4.9|C01F4.9	0.131	0	0	0.956	1
C01F6.12|C01F6.12	0	0	NaN	NA	NA
C01F6.13|C01F6.13	0	0.519	Inf	0.788	1
C01F6.2|C01F6.2|C01F6.2	29.7	25	0.8423	0.517	0.778
C01F6.9|C01F6.9|C01F6.9	650	571	0.8783	3.11e-08	1.81e-07
C01G10.10|C01G10.10|C01G10.10	724	717	0.9911	0.978	1
C01G10.13|C01G10.13	11.1	9.21	0.8322	0.18	0.344
C01G10.14|C01G10.14|C01G10.14	2.18	1.52	0.6974	1	1
C01G10.15|C01G10.15|C01G10.15	4.19	2.21	0.528	0.0403	0.0956
C01G10.16|C01G10.16|C01G10.16	2.91	6.11	2.0981	0.0939	0.199
C01G10.17|C01G10.17|C01G10.17	0.303	0	0	0.893	1
C01G10.18|C01G10.18|C01G10.18	0	0.294	Inf	0.985	1
C01G10.19|C01G10.19	0.273	0.147	0.5393	0.954	1
C01G10.1|C01G10.1|C01G10.1	17.7	13.3	0.7503	0.0896	0.191
C01G10.4|C01G10.4|C01G10.4	0.702	0.147	0.2094	0.616	0.881
C01G10.5|C01G10.5|C01G10.5	1.91	1.2	0.6294	0.242	0.437
C01G10.6|C01G10.6|C01G10.6	1.17	1.84	1.5683	0.806	1
C01G10.7|C01G10.7|C01G10.7	507	440	0.8673	9.18e-09	5.66e-08
C01G10.8|C01G10.8|C01G10.8	6410	5960	0.9305	2.54e-20	3.62e-19
C01G10.9|C01G10.9|C01G10.9	602	561	0.9311	0.000952	0.0032
C01G12.12|C01G12.12	161	130	0.809	0.175	0.336
C01G12.13|C01G12.13|C01G12.13	5.46	4.51	0.8257	0.794	1
C01G12.14|C01G12.14	1.25	2.04	1.6331	0.548	0.81
C01G12.15|C01G12.15	0.131	0	0	0.956	1
C01G12.1|C01G12.1|C01G12.1	897	994	1.1088	1.07e-05	4.71e-05
C01G12.3|C01G12.3|C01G12.3	401	346	0.8631	0.000443	0.00156
C01G12.5|C01G12.5|C01G12.5	50.2	31.8	0.6337	1.04e-10	7.64e-10
C01G12.7|C01G12.7|C01G12.7	51.1	58.8	1.1506	0.113	0.233
C01G12.9|C01G12.9|C01G12.9	3.47	1.68	0.4857	0.308	0.529
C01G5.3|C01G5.3|C01G5.3	84.8	81.2	0.9579	1	1
C01G5.4|C01G5.4|C01G5.4	16.4	13.8	0.837	0.0158	0.0417
C01G5.5|C01G5.5|C01G5.5	441	367	0.8325	0.108	0.225
C01G5.6|C01G5.6|C01G5.6	1610	1380	0.8578	1.15e-10	8.4e-10
C01G5.7|C01G5.7|C01G5.7	40.9	38.6	0.9442	0.358	0.595
C01G5.9|C01G5.9|C01G5.9	348	332	0.9533	0.0168	0.0441
C01G6.10|C01G6.10	9.83	18.5	1.887	5.51e-07	2.81e-06
C01G6.13|C01G6.13	2.73	3.49	1.2805	0.568	0.833
C01G6.2|C01G6.2|C01G6.2	113	79.8	0.7059	0.000418	0.00148
C01G6.3|C01G6.3|C01G6.3	15300	14100	0.921	1.57e-79	1.24e-77
C01G6.4|C01G6.4|C01G6.4	1900	1840	0.971	5.05e-05	0.000204
C01G6.5|C01G6.5|C01G6.5	4550	4590	1.0087	7.17e-12	5.8e-11
C01G6.9|C01G6.9|C01G6.9	779	728	0.9343	0.000124	0.000474
C01G8.10|C01G8.10	0	0	NaN	NA	NA
C01G8.1|C01G8.1|C01G8.1a	357	357	1.0004	0.922	1
C01G8.1|C01G8.1|C01G8.1b	374	368	0.9822	0.713	0.962
C01G8.6|C01G8.6|C01G8.6	211	216	1.0252	0.757	0.997
C01H6.10|C01H6.10	0	0	NaN	NA	NA
C01H6.11|C01H6.11	4.54	6.39	1.4072	0.638	0.904
C01H6.2|C01H6.2|C01H6.2	306	348	1.1383	5.11e-06	2.35e-05
C01H6.3|C01H6.3|C01H6.3	70.6	73.2	1.0363	0.467	0.724
C01H6.4|C01H6.4|C01H6.4	121	116	0.9568	0.0996	0.209
C01H6.6|C01H6.6|C01H6.6	401	411	1.0236	0.6	0.866
C01H6.8|C01H6.8|C01H6.8a	443	460	1.0385	0.0565	0.129
C01H6.8|C01H6.8|C01H6.8b	295	316	1.0706	0.181	0.345
C01H6.9|C01H6.9|C01H6.9	1890	1700	0.8963	0.681	0.934
C02B10.2|C02B10.2|C02B10.2	554	524	0.9454	0.0289	0.0714
C02B10.3|C02B10.3|C02B10.3	2290	2760	1.2036	1.14e-26	2.26e-25
C02B10.4|C02B10.4|C02B10.4	3560	3450	0.9696	0.545	0.807
C02B10.5|C02B10.5|C02B10.5	4700	4870	1.0366	0.469	0.727
C02B10.6|C02B10.6|C02B10.6	3.22	2.2	0.6851	0.426	0.678
C02B10.71|C02B10.71	0	0	NaN	NA	NA
C02B10.72|C02B10.72	0.293	0.294	1.0028	1	1
C02B10.73|C02B10.73	0	0.147	Inf	1	1
C02B10.74|C02B10.74	0	0.473	Inf	0.825	1
C02B4.10|C02B4.10	0	0.147	Inf	1	1
C02B4.11|C02B4.11	0	0.356	Inf	0.958	1
C02B4.12|C02B4.12	0	0	NaN	NA	NA
C02B4.13|C02B4.13	0	0	NaN	NA	NA
C02B4.14|C02B4.14	0	0	NaN	NA	NA
C02B4.3|C02B4.3|C02B4.3	0	0	NaN	NA	NA
C02B4.4|C02B4.4|C02B4.4	91.1	93.6	1.0278	0.791	1
C02B4.5|C02B4.5	0	0	NaN	NA	NA
C02B4.6|C02B4.6	0	0.147	Inf	1	1
C02B4.7|C02B4.7	0	0	NaN	NA	NA
C02B4.8|C02B4.8	3.7	2.25	0.6097	0.426	0.678
C02B4.9|C02B4.9	0	0	NaN	NA	NA
C02B4.t1|C02B4.t1	0	0	NaN	NA	NA
C02B4.t2|C02B4.t2	0.151	0	0	0.956	1
C02B8.11|C02B8.11	0	0.113	Inf	1	1
C02B8.1|C02B8.1|C02B8.1	95.6	71	0.7434	0.000177	0.000663
C02B8.3|C02B8.3|C02B8.3	22.5	12.9	0.5733	0.00905	0.0252
C02B8.5|C02B8.5|C02B8.5	12.1	10.6	0.8774	1	1
C02B8.6|C02B8.6|C02B8.6	914	877	0.9601	0.000659	0.00226
C02B8.7|C02B8.7|C02B8.7	0.151	0.113	0.748	1	1
C02C2.4|C02C2.4|C02C2.4	64.3	32.7	0.5094	1.02e-07	5.61e-07
C02C2.5|C02C2.5|C02C2.5	158	140	0.8855	0.302	0.521
C02C6.10|C02C6.10	0	0	NaN	NA	NA
C02C6.11|C02C6.11	0.261	0.299	1.1423	1	1
C02C6.12|C02C6.12	0.184	0.322	1.7517	1	1
C02C6.3|C02C6.3|C02C6.3a	981	1140	1.1669	4.78e-06	2.2e-05
C02C6.3|C02C6.3|C02C6.3b	553	611	1.104	0.591	0.857
C02C6.3|C02C6.3|C02C6.3c	98.7	113	1.1495	0.336	0.567
C02C6.3|C02C6.3|C02C6.3d	354	385	1.0873	0.51	0.772
C02C6.4|C02C6.4	0	0.45	Inf	0.843	1
C02C6.5|C02C6.5	0.445	0.446	1.0013	1	1
C02C6.6|C02C6.6	0.131	0.113	0.866	0.997	1
C02C6.7|C02C6.7	0	0	NaN	NA	NA
C02C6.8|C02C6.8	0.261	0.113	0.433	0.955	1
C02C6.9|C02C6.9	0.184	0.322	1.7517	1	1
C02D4.10|C02D4.10	0.142	1.62	11.4321	0.018	0.0469
C02D4.11|C02D4.11	0.568	0.147	0.259	0.69	0.942
C02D4.12|C02D4.12	6.55	9.69	1.4797	0.335	0.566
C02D4.13|C02D4.13	0.142	1.41	9.9629	0.0583	0.132
C02D4.14|C02D4.14	0	0	NaN	NA	NA
C02D4.15|C02D4.15	52.8	61.5	1.1654	0.000247	0.000906
C02D4.16|C02D4.16	52.8	61.5	1.1654	0.000247	0.000906
C02D4.5|C02D4.5	1.43	0.797	0.5569	0.222	0.408
C02D4.6|C02D4.6	0	0	NaN	NA	NA
C02D4.7|C02D4.7	0	0	NaN	NA	NA
C02D4.8|C02D4.8	0.303	0	0	0.893	1
C02D4.9|C02D4.9	0.131	0.152	1.1594	1	1
C02D4.t1|C02D4.t1	1.77	1.78	1.003	0.66	0.915
C02D5.2|C02D5.2|C02D5.2a	598	622	1.0404	0.935	1
C02D5.2|C02D5.2|C02D5.2b	501	520	1.0391	0.885	1
C02D5.4|C02D5.4|C02D5.4	811	736	0.9076	1.15e-12	9.83e-12
C02D5.5|C02D5.5	0	0.147	Inf	1	1
C02E7.10|C02E7.10|C02E7.10	1.42	0.36	0.2532	0.91	1
C02E7.16|C02E7.16	0	0.152	Inf	1	1
C02E7.17|C02E7.17	0	0.113	Inf	1	1
C02E7.6|C02E7.6|C02E7.6	1350	1630	1.202	9.46e-05	0.000368
C02E7.7|C02E7.7|C02E7.7	862	999	1.1601	0.0186	0.0484
C02E7.8|C02E7.8|C02E7.8	1.88	1.77	0.9411	0.442	0.695
C02F12.10|C02F12.10|C02F12.10	31.5	26.2	0.8299	0.0793	0.172
C02F12.3|C02F12.3|C02F12.3	254	297	1.1689	0.0237	0.0597
C02F12.5|C02F12.5|C02F12.5	10.1	7.98	0.7862	0.431	0.684
C02F12.8|C02F12.8|C02F12.8	673	672	0.998	0.0245	0.0615
C02F12.9|C02F12.9|C02F12.9	8.54	9.49	1.1109	0.182	0.347
C02F12.t1|C02F12.t1	0.142	0	0	0.956	1
C02F4.10|C02F4.10	0.587	3.24	5.5102	0.00849	0.0238
C02F4.11|C02F4.11	0	0.147	Inf	1	1
C02F4.4|C02F4.4|C02F4.4	270	305	1.1275	0.099	0.208
C02F4.5|C02F4.5|C02F4.5	0.261	0.147	0.5625	0.955	1
C02F4.9|C02F4.9	0.131	0	0	0.956	1
C02F5.10|C02F5.10|C02F5.10	96.9	77.3	0.7974	0.0292	0.072
C02F5.12|C02F5.12|C02F5.12	961	871	0.9065	2.75e-12	2.29e-11
C02F5.13|C02F5.13|C02F5.13	629	504	0.8012	2.35e-13	2.13e-12
C02F5.14|C02F5.14|C02F5.14	88.9	86.9	0.9774	0.0202	0.0519
C02F5.2|C02F5.2|C02F5.2	15.2	13.7	0.9029	0.539	0.8
C02F5.3|C02F5.3|C02F5.3	3290	2900	0.8817	4.4e-30	1.01e-28
C02F5.5|C02F5.5|C02F5.5	15.9	10.6	0.6677	0.0156	0.0413
C02F5.6|C02F5.6|C02F5.6a	702	609	0.8685	0.219	0.403
C02F5.6|C02F5.6|C02F5.6b	822	704	0.8565	0.0632	0.141
C02F5.7|C02F5.7|C02F5.7a	2740	3300	1.2013	2.24e-26	4.37e-25
C02F5.7|C02F5.7|C02F5.7b	1800	2000	1.114	2.14e-09	1.4e-08
C02G6.1|C02G6.1|C02G6.1	70.6	71.9	1.0181	0.109	0.226
C02G6.2|C02G6.2|C02G6.2	10.9	8.39	0.77	0.799	1
C02G6.3|C02G6.3|C02G6.3	82.3	98.2	1.1926	0.479	0.738
C02G6.5|C02G6.5	0	0.36	Inf	0.956	1
C02H6.1|C02H6.1|C02H6.1	0.816	0.559	0.6848	0.723	0.971
C02H7.4|C02H7.4	0	0	NaN	NA	NA
C02H7.5|C02H7.5	0	0	NaN	NA	NA
C03A3.1|C03A3.1|C03A3.1a	867	791	0.9113	1.37e-11	1.09e-10
C03A3.1|C03A3.1|C03A3.1b	855	745	0.8718	6.55e-19	8.67e-18
C03A3.2|C03A3.2|C03A3.2	1670	1830	1.097	1.67e-05	7.21e-05
C03A3.3|C03A3.3|C03A3.3	57.6	60.1	1.0443	0.615	0.881
C03A3.4|C03A3.4	0	0	NaN	NA	NA
C03A3.5|C03A3.5	0.282	0.209	0.7396	0.954	1
C03A3.6|C03A3.6	0.284	0.152	0.5337	0.954	1
C03A3.7|C03A3.7	0.142	0.113	0.7973	1	1
C03A3.8|C03A3.8	1.52	0.373	0.2456	0.895	1
C03A3.t1|C03A3.t1	0.273	0.26	0.9544	1	1
C03A7.12|C03A7.12|C03A7.12	44.3	40.6	0.9169	0.217	0.4
C03A7.13|C03A7.13|C03A7.13	34.7	22.6	0.6505	1	1
C03A7.15|C03A7.15	0.468	0.356	0.7605	0.943	1
C03A7.2|C03A7.2|C03A7.2	23.3	27.9	1.1984	0.0856	0.184
C03B1.10|C03B1.10|C03B1.10	8.37	12.6	1.5066	0.313	0.537
C03B1.13|C03B1.13|C03B1.13	278	242	0.8737	0.762	1
C03B1.14|C03B1.14|C03B1.14	28.2	27.7	0.9813	0.421	0.673
C03B1.16|C03B1.16	0.142	0	0	0.956	1
C03B1.1|C03B1.1|C03B1.1	10.6	10	0.947	0.835	1
C03B1.2|C03B1.2|C03B1.2	11	10.4	0.9478	0.642	0.907
C03B1.3|C03B1.3|C03B1.3	1.13	0.525	0.4653	0.478	0.738
C03B1.4|C03B1.4|C03B1.4	12	7.87	0.6535	0.237	0.431
C03B1.5|C03B1.5|C03B1.5	100	112	1.1188	0.00124	0.0041
C03B1.6|C03B1.6|C03B1.6a	0.261	0.147	0.5625	0.955	1
C03B1.6|C03B1.6|C03B1.6b	1.15	1.2	1.041	0.654	0.915
C03B1.7|C03B1.7|C03B1.7	701	572	0.8163	0.000152	0.000577
C03B1.9|C03B1.9|C03B1.9	0.801	0.602	0.7514	0.904	1
C03B8.2|C03B8.2|C03B8.2	183	151	0.8244	0.00264	0.0082
C03B8.3|C03B8.3|C03B8.3	22.9	17.9	0.7813	0.472	0.731
C03B8.5|C03B8.5	0.151	0	0	0.956	1
C03B8.6|C03B8.6	0	0	NaN	NA	NA
C03C10.10|C03C10.10	0.282	0.113	0.4013	0.955	1
C03C10.11|C03C10.11	0	0.147	Inf	1	1
C03C10.12|C03C10.12	0.131	0	0	0.956	1
C03C10.2|C03C10.2|C03C10.2	43.6	48.2	1.1046	0.548	0.81
C03C10.4|C03C10.4|C03C10.4	1270	964	0.7616	4.68e-33	1.18e-31
C03C10.5|C03C10.5|C03C10.5	216	239	1.1056	0.0833	0.18
C03C10.7|C03C10.7|C03C10.7	188	137	0.7318	6.65e-10	4.57e-09
C03C10.9|C03C10.9|C03C10.9	109	121	1.1125	0.546	0.808
C03C11.1|C03C11.1|C03C11.1	15.5	9.79	0.631	0.0122	0.0331
C03C11.5|C03C11.5	0.282	0.26	0.9228	1	1
C03C11.6|C03C11.6	0.486	0.554	1.1399	1	1
C03C11.7|C03C11.7	0.151	0.554	3.6635	0.795	1
C03C11.8|C03C11.8	0.282	0.26	0.9228	1	1
C03D6.1|C03D6.1|C03D6.1	132	112	0.8505	0.0212	0.0542
C03E10.1|C03E10.1|C03E10.1	0.445	0	0	0.759	0.999
C03E10.3|C03E10.3|C03E10.3	26.4	24.5	0.931	0.307	0.528
C03E10.8|C03E10.8	0.629	0.113	0.18	0.674	0.929
C03E10.9|C03E10.9	0.282	0.606	2.1494	0.908	1
C03F11.1|C03F11.1|C03F11.1	31.4	34	1.0831	0.0818	0.177
C03F11.2|C03F11.2|C03F11.2	90.3	114	1.2574	0.00188	0.00602
C03F11.4|C03F11.4|C03F11.4	299	287	0.9586	0.863	1
C03F11.5|C03F11.5	0.131	0	0	0.956	1
C03F11.6|C03F11.6	0	0	NaN	NA	NA
C03F11.7|C03F11.7	0.477	0.265	0.555	0.946	1
C03F11.t1|C03F11.t1	0.142	0	0	0.956	1
C03G6.17|C03G6.17|C03G6.17	101	98.4	0.9783	0.404	0.65
C03G6.5|C03G6.5|C03G6.5	21.6	16.3	0.7578	0.00173	0.00558
C03G6.6|C03G6.6|C03G6.6	8.46	13	1.5383	0.222	0.407
C03H12.1|C03H12.1|C03H12.1	1290	1330	1.0316	0.0219	0.0557
C03H12.2|C03H12.2	15.1	16.2	1.0733	0.848	1
C03H12.3|C03H12.3	15.3	16.5	1.0811	0.896	1
C03H5.2|C03H5.2|C03H5.2	925	960	1.0387	0.0147	0.039
C03H5.3|C03H5.3|C03H5.3	945	838	0.8871	3.4e-06	1.59e-05
C03H5.4|C03H5.4|C03H5.4	23.1	10	0.4339	4.88e-05	0.000198
C03H5.5|C03H5.5|C03H5.5	232	217	0.9343	0.385	0.627
C03H5.6|C03H5.6|C03H5.6	200	234	1.1671	0.0717	0.158
C03H5.7|C03H5.7|C03H5.7	160	123	0.7675	0.0582	0.132
C03H5.8|C03H5.8	2.13	0.874	0.4109	0.466	0.724
C04A11.1|C04A11.1|C04A11.1	222	227	1.0196	0.684	0.936
C04A11.2|C04A11.2|C04A11.2	841	858	1.0196	0.0508	0.117
C04A11.5|C04A11.5|C04A11.5	17.2	19.9	1.1568	0.365	0.604
C04A11.6|C04A11.6	0.403	0.299	0.7403	0.947	1
C04A11.7|C04A11.7	0	0.147	Inf	1	1
C04A11.8|C04A11.8	0.617	0.299	0.4839	0.781	1
C04A11.t1|C04A11.t1	0	0.113	Inf	1	1
C04A2.10|C04A2.10	0.413	0.446	1.0798	1	1
C04A2.11|C04A2.11	1.15	1.99	1.7292	0.401	0.647
C04A2.12|C04A2.12	0.575	0.881	1.5307	0.903	1
C04A2.13|C04A2.13	0.413	0.446	1.0798	1	1
C04A2.14|C04A2.14	0	0.937	Inf	0.22	0.404
C04A2.8|C04A2.8	0.151	0	0	0.956	1
C04A2.9|C04A2.9	0.261	0	0	0.909	1
C04A2.t1|C04A2.t1	0	0.446	Inf	0.847	1
C04B4.1|C04B4.1|C04B4.1	4.12	3.67	0.8912	0.443	0.697
C04B4.2|C04B4.2|C04B4.2	478	439	0.9176	0.00588	0.017
C04B4.4|C04B4.4|C04B4.4	5.98	4.72	0.7891	0.881	1
C04B4.5|C04B4.5|C04B4.5	0.314	0	0	0.888	1
C04B4.6|C04B4.6|C04B4.6	0	0	NaN	NA	NA
C04C11.10|C04C11.10	0.848	1.81	2.1401	0.33	0.558
C04C11.11|C04C11.11	0.131	0	0	0.956	1
C04C11.12|C04C11.12	0	0	NaN	NA	NA
C04C11.13|C04C11.13	0.848	1.81	2.1401	0.33	0.558
C04C11.14|C04C11.14	0.131	0	0	0.956	1
C04C11.15|C04C11.15	0	0	NaN	NA	NA
C04C11.16|C04C11.16	0.273	0	0	0.905	1
C04C11.17|C04C11.17	0	0	NaN	NA	NA
C04C11.18|C04C11.18	0	0	NaN	NA	NA
C04C11.19|C04C11.19	0	0	NaN	NA	NA
C04C11.1|C04C11.1	55	41.4	0.7517	0.0013	0.00427
C04C11.1|C04C11.1|C04C11.1a	62.2	44.3	0.7127	0.000282	0.00102
C04C11.20|C04C11.20	0	0	NaN	NA	NA
C04C11.21|C04C11.21	1.92	0.67	0.349	0.639	0.904
C04C11.22|C04C11.22	0.131	0	0	0.956	1
C04C11.5|C04C11.5	0.131	0	0	0.956	1
C04C11.6|C04C11.6	3.16	3.78	1.1949	0.0136	0.0365
C04C11.7|C04C11.7	0	0.147	Inf	1	1
C04C11.8|C04C11.8	2.03	1.63	0.8052	0.521	0.782
C04C11.9|C04C11.9	3.99	5.41	1.3564	0.00915	0.0255
C04C3.10|C04C3.10	0	0	NaN	NA	NA
C04C3.11|C04C3.11	0	0	NaN	NA	NA
C04C3.12|C04C3.12	0	0	NaN	NA	NA
C04C3.13|C04C3.13	0	0	NaN	NA	NA
C04C3.3|C04C3.3|C04C3.3	2200	2460	1.1211	6.54e-07	3.31e-06
C04C3.4|C04C3.4|C04C3.4	12.3	8.74	0.7133	0.00773	0.0219
C04C3.6|C04C3.6|C04C3.6	6.08	7.51	1.2363	0.565	0.83
C04C3.7|C04C3.7|C04C3.7	0.142	0	0	0.956	1
C04C3.9|C04C3.9|C04C3.9	1.76	5.21	2.9668	0.105	0.22
C04D8.2|C04D8.2	0.131	0.294	2.2502	1	1
C04D8.3|C04D8.3	0.902	0.407	0.4518	0.559	0.823
C04D8.4|C04D8.4	0.282	0.439	1.5575	1	1
C04D8.5|C04D8.5	0.293	0.591	2.0144	1	1
C04E12.10|C04E12.10|C04E12.10	0.424	0.847	1.9971	0.73	0.977
C04E12.2|C04E12.2|C04E12.2	3.46	3.38	0.9766	0.979	1
C04E12.4|C04E12.4|C04E12.4	4.93	4.31	0.8744	0.516	0.778
C04E12.5|C04E12.5|C04E12.5	2.98	3.21	1.0783	0.986	1
C04E12.6|C04E12.6|C04E12.6	0.456	0.113	0.248	0.844	1
C04E6.11|C04E6.11|C04E6.11	581	505	0.8695	5.25e-05	0.000212
C04E6.12|C04E6.12	62.5	61.1	0.9785	0.392	0.637
C04E6.13|C04E6.13|C04E6.13	32.8	32.9	1.0018	0.626	0.891
C04E6.14|C04E6.14	0	0	NaN	NA	NA
C04E6.3|C04E6.3|C04E6.3	0.151	0.147	0.9718	1	1
C04E6.4|C04E6.4|C04E6.4	0.131	0.113	0.866	0.997	1
C04E6.5|C04E6.5|C04E6.5	0.598	0.147	0.2458	0.673	0.927
C04E6.7|C04E6.7|C04E6.7	151	123	0.8149	2.06e-10	1.48e-09
C04E6.8|C04E6.8|C04E6.8	6.31	5.11	0.8104	0.375	0.616
C04E7.1|C04E7.1|C04E7.1	2.15	1.89	0.8814	0.658	0.915
C04E7.3|C04E7.3|C04E7.3	242	204	0.8421	0.776	1
C04E7.4|C04E7.4|C04E7.4	346	291	0.8403	0.00539	0.0157
C04E7.5|C04E7.5|C04E7.5	5.81	2.68	0.4609	0.287	0.501
C04E7.7|C04E7.7	3.98	2.06	0.5178	0.618	0.883
C04E7.t1|C04E7.t1	3.98	1.62	0.407	1	1
C04F1.1|C04F1.1|C04F1.1	3.13	4.39	1.404	0.665	0.919
C04F1.4|C04F1.4	3.63	3.14	0.867	1	1
C04F1.5|C04F1.5	1.73	0.892	0.517	1	1
C04F12.12|C04F12.12|C04F12.12	1.85	1.71	0.9218	0.816	1
C04F12.15|C04F12.15	0.837	1.05	1.251	1	1
C04F12.1|C04F12.1|C04F12.1	600	647	1.0776	1.4e-12	1.19e-11
C04F12.5|C04F12.5|C04F12.5	149	133	0.894	0.0229	0.058
C04F12.6|C04F12.6|C04F12.6	5.54	4.78	0.862	0.904	1
C04F12.7|C04F12.7|C04F12.7	20.6	18.5	0.9003	0.324	0.552
C04F12.8|C04F12.8|C04F12.8	153	138	0.8999	0.00286	0.00882
C04F12.t1|C04F12.t1	19.1	14.7	0.7695	0.331	0.56
C04F2.t1|C04F2.t1	0.293	0.491	1.6745	0.93	1
C04F5.2|C04F5.2|C04F5.2	1.22	1.32	1.082	1	1
C04F5.8|C04F5.8|C04F5.8	1570	1460	0.9299	4.66e-06	2.15e-05
C04F5.9|C04F5.9|C04F5.9	438	438	0.9995	0.282	0.494
C04F6.2|C04F6.2|C04F6.2	33.7	35.9	1.0641	0.711	0.96
C04F6.7|C04F6.7|C04F6.7	2.49	3.3	1.3227	0.31	0.532
C04F6.8|C04F6.8	0	0.113	Inf	1	1
C04G2.10|C04G2.10|C04G2.10a	25.1	22.2	0.8848	1	1
C04G2.10|C04G2.10|C04G2.10b	16.4	15.6	0.9526	0.636	0.902
C04G2.11|C04G2.11|C04G2.11	15.3	6.92	0.4512	0.0308	0.0755
C04G2.12|C04G2.12	0.151	0.701	4.6353	0.621	0.886
C04G2.2|C04G2.2|C04G2.2	14.4	11.6	0.8053	0.672	0.926
C04G2.3|C04G2.3	11.7	10.8	0.9247	0.883	1
C04G2.5|C04G2.5|C04G2.5	25.8	12	0.4658	9.37e-08	5.2e-07
C04G2.8|C04G2.8|C04G2.8	10.4	6.83	0.6592	0.197	0.371
C04G2.9|C04G2.9|C04G2.9	5.25	5.04	0.9615	0.869	1
C04G6.10|C04G6.10|C04G6.10	129	169	1.3081	2.35e-06	1.12e-05
C04G6.11|C04G6.11|C04G6.11	0.695	0.439	0.6322	0.569	0.834
C04G6.12|C04G6.12	0	0	NaN	NA	NA
C04G6.13|C04G6.13|C04G6.13	2.09	1.05	0.5022	1	1
C04G6.14|C04G6.14	11.4	11.6	1.0198	0.248	0.446
C04G6.2|C04G6.2|C04G6.2	19.3	21.5	1.1114	0.589	0.855
C04G6.4|C04G6.4|C04G6.4	839	823	0.9811	0.0939	0.199
C04G6.5|C04G6.5|C04G6.5	49	50.6	1.0329	0.247	0.444
C04G6.6|C04G6.6|C04G6.6	22.6	32.8	1.4471	3.41e-06	1.59e-05
C04G6.7|C04G6.7|C04G6.7	121	152	1.2485	0.000124	0.000476
C04H4.1|C04H4.1|C04H4.1	2.07	2.35	1.1364	0.0906	0.193
C04H4.2|C04H4.2	0	0.152	Inf	1	1
C04H4.3|C04H4.3	0	0	NaN	NA	NA
C04H4.4|C04H4.4	0	0	NaN	NA	NA
C04H4.5|C04H4.5	0.273	0	0	0.905	1
C04H4.6|C04H4.6	0.142	0.152	1.0675	1	1
C04H5.10|C04H5.10	0	0	NaN	NA	NA
C04H5.1|C04H5.1|C04H5.1	417	415	0.9968	0.34	0.573
C04H5.7|C04H5.7|C04H5.7a	6.12	14.5	2.3655	1.85e-05	7.95e-05
C04H5.7|C04H5.7|C04H5.7b	19.9	39.8	2.0028	1.65e-08	9.89e-08
C04H5.9|C04H5.9	8.39	15.4	1.8322	0.0557	0.127
C05A2.2|C05A2.2	0	0	NaN	NA	NA
C05A2.3|C05A2.3	0.151	0.113	0.748	1	1
C05A9.10|C05A9.10	0.509	1.39	2.7193	0.0851	0.183
C05A9.11|C05A9.11	0	0.147	Inf	1	1
C05A9.2|C05A9.2|C05A9.2	1010	1070	1.0618	0.291	0.506
C05A9.3|C05A9.3	0.435	0.9	2.0684	0.711	0.96
C05A9.4|C05A9.4	0	0.416	Inf	0.87	1
C05A9.5|C05A9.5	3.16	4.19	1.3266	0.00431	0.0128
C05A9.6|C05A9.6	3.3	4.08	1.2353	0.0121	0.0329
C05A9.7|C05A9.7	4.03	5.36	1.329	0.56	0.824
C05A9.8|C05A9.8	0	0.147	Inf	1	1
C05A9.9|C05A9.9	0.824	2.13	2.5904	0.0456	0.107
C05B10.14|C05B10.14	0	0	NaN	NA	NA
C05B10.15|C05B10.15	0.314	0.152	0.482	0.954	1
C05B10.16|C05B10.16	0	0.299	Inf	0.983	1
C05B10.17|C05B10.17	10.6	12.5	1.178	0.0629	0.141
C05B10.18|C05B10.18	0.303	1.45	4.8065	0.0569	0.129
C05B10.19|C05B10.19	0.314	0.152	0.482	0.954	1
C05B10.20|C05B10.20	0.424	0.26	0.6138	0.948	1
C05B10.21|C05B10.21	0	0.147	Inf	1	1
C05B5.10|C05B5.10	1.78	1.12	0.6289	0.362	0.601
C05B5.11|C05B5.11|C05B5.11	5.48	3.89	0.7104	0.626	0.892
C05B5.12|C05B5.12|C05B5.12	0.835	0.817	0.9787	1	1
C05B5.13|C05B5.13	1.7	1.79	1.0521	0.206	0.384
C05B5.14|C05B5.14	1.58	1.31	0.8294	0.832	1
C05B5.15|C05B5.15	0.519	0.473	0.9125	1	1
C05B5.1|C05B5.1|C05B5.1	3.57	2.22	0.6207	0.876	1
C05B5.2|C05B5.2|C05B5.2	3.28	3.04	0.9272	0.763	1
C05B5.4|C05B5.4|C05B5.4	342	315	0.9233	0.751	0.993
C05B5.5|C05B5.5|C05B5.5	18.3	18.6	1.0151	0.797	1
C05B5.8|C05B5.8|C05B5.8	438	416	0.9496	0.000383	0.00136
C05B5.9|C05B5.9	7	6.49	0.9269	1	1
C05C10.2|C05C10.2|C05C10.2a	3990	3610	0.9054	0.00798	0.0225
C05C10.2|C05C10.2|C05C10.2b	8030	7270	0.9049	9.39e-05	0.000366
C05C10.3|C05C10.3|C05C10.3	2520	2820	1.1194	7.2e-29	1.57e-27
C05C10.5|C05C10.5|C05C10.5a	1710	1590	0.9295	0.00488	0.0144
C05C10.5|C05C10.5|C05C10.5b	1100	1060	0.964	0.297	0.514
C05C10.5|C05C10.5|C05C10.5c	3190	3040	0.9539	0.00681	0.0195
C05C10.7|C05C10.7|C05C10.7	90.8	71.6	0.7883	0.00547	0.0159
C05C10.8|C05C10.8|C05C10.8	1.99	2.07	1.0381	0.973	1
C05C12.10|C05C12.10	0	0.209	Inf	1	1
C05C12.1|C05C12.1|C05C12.1	7.94	6.75	0.8501	0.569	0.833
C05C12.4|C05C12.4|C05C12.4	332	342	1.0305	0.293	0.509
C05C12.5|C05C12.5|C05C12.5	2.7	1.29	0.4769	0.66	0.915
C05C12.6|C05C12.6|C05C12.6	30	25.9	0.863	0.334	0.564
C05C8.10|C05C8.10	50.8	49.2	0.9684	0.071	0.156
C05C8.1|C05C8.1|C05C8.1a	780	651	0.8352	2.22e-12	1.86e-11
C05C8.1|C05C8.1|C05C8.1b	344	289	0.8416	1.27e-05	5.58e-05
C05C8.2|C05C8.2|C05C8.2	2410	2150	0.8936	9.17e-08	5.09e-07
C05C8.5|C05C8.5|C05C8.5	2130	1820	0.8542	9.78e-05	0.00038
C05C8.6|C05C8.6|C05C8.6	1200	1120	0.9344	9.05e-05	0.000354
C05C8.7|C05C8.7|C05C8.7	7160	8630	1.2059	9.87e-78	7.65e-76
C05C8.8|C05C8.8|C05C8.8	2.96	5.95	2.0076	0.143	0.285
C05C9.10|C05C9.10	0	0	NaN	NA	NA
C05C9.11|C05C9.11	0	0.299	Inf	0.983	1
C05C9.12|C05C9.12	0	0	NaN	NA	NA
C05C9.13|C05C9.13	0	0	NaN	NA	NA
C05C9.14|C05C9.14	0	0	NaN	NA	NA
C05C9.1|C05C9.1|C05C9.1	171	197	1.153	0.000474	0.00166
C05C9.2|C05C9.2|C05C9.2	27.1	20.4	0.7529	0.00148	0.00482
C05C9.3|C05C9.3|C05C9.3	46.8	35.3	0.7537	0.025	0.0627
C05C9.5|C05C9.5	0	0	NaN	NA	NA
C05C9.6|C05C9.6	0	0.152	Inf	1	1
C05C9.7|C05C9.7	5.26	2.21	0.4202	0.996	1
C05C9.8|C05C9.8	0	0	NaN	NA	NA
C05C9.9|C05C9.9	0	0	NaN	NA	NA
C05C9.t1|C05C9.t1	3.98	1.62	0.407	1	1
C05C9.t2|C05C9.t2	3.98	1.62	0.407	1	1
C05D10.1|C05D10.1|C05D10.1a	2040	2310	1.1277	1.43e-10	1.04e-09
C05D10.1|C05D10.1|C05D10.1b	1540	1770	1.1477	1.81e-10	1.3e-09
C05D10.1|C05D10.1|C05D10.1c	6710	7550	1.125	4.35e-28	9.22e-27
C05D10.2|C05D10.2|C05D10.2a	416	457	1.1006	7.15e-06	3.22e-05
C05D10.2|C05D10.2|C05D10.2b	495	562	1.1353	4.29e-10	3.02e-09
C05D10.2|C05D10.2|C05D10.2c	397	446	1.122	3.26e-06	1.53e-05
C05D10.4|C05D10.4|C05D10.4a	996	1160	1.1678	7.31e-10	5e-09
C05D10.4|C05D10.4|C05D10.4b	1050	1210	1.1484	2.01e-08	1.2e-07
C05D10.4|C05D10.4|C05D10.4c	855	983	1.1491	1.36e-06	6.67e-06
C05D11.10|C05D11.10|C05D11.10	626	568	0.9064	1.99e-09	1.31e-08
C05D11.13|C05D11.13|C05D11.13	450	463	1.0289	0.0202	0.052
C05D11.1|C05D11.1|C05D11.1	2430	2440	1.0026	0.833	1
C05D11.5|C05D11.5|C05D11.5	169	165	0.9775	0.158	0.309
C05D11.7|C05D11.7|C05D11.7a	5130	5350	1.0447	0.000369	0.00132
C05D11.7|C05D11.7|C05D11.7b	3060	3150	1.0298	0.0969	0.204
C05D11.8|C05D11.8|C05D11.8	1360	1370	1.0118	0.0718	0.158
C05D11.9|C05D11.9|C05D11.9	1610	1250	0.7816	9.13e-27	1.81e-25
C05D12.10|C05D12.10	0	0	NaN	NA	NA
C05D12.11|C05D12.11	0.837	0.45	0.538	0.567	0.832
C05D12.1|C05D12.1|C05D12.1	555	681	1.2275	1.5e-05	6.53e-05
C05D12.2|C05D12.2|C05D12.2	19.2	11.2	0.5817	0.14	0.28
C05D12.3|C05D12.3	252	321	1.2742	8.3e-08	4.63e-07
C05D12.3|C05D12.3|C05D12.3a	256	327	1.2779	5.5e-08	3.12e-07
C05D12.3|C05D12.3|C05D12.3c	507	643	1.2665	5.93e-16	6.53e-15
C05D12.4|C05D12.4|C05D12.4	687	537	0.7806	1.92e-08	1.15e-07
C05D12.5|C05D12.5|C05D12.5	557	412	0.739	8.12e-11	6.02e-10
C05D12.7|C05D12.7|C05D12.7	38.9	44.7	1.1475	0.235	0.428
C05D12.8|C05D12.8	0.857	0.226	0.2641	0.481	0.741
C05D12.9|C05D12.9	0.837	0.45	0.538	0.567	0.832
C05D2.10|C05D2.10|C05D2.10a	3780	3810	1.0079	0.000116	0.000448
C05D2.10|C05D2.10|C05D2.10b	1780	1810	1.0178	0.0181	0.0472
C05D2.11|C05D2.11	419	566	1.3524	3e-43	1.07e-41
C05D2.12|C05D2.12	0	0	NaN	NA	NA
C05D2.13|C05D2.13	0	0	NaN	NA	NA
C05D2.14|C05D2.14	13.3	19.4	1.4591	0.000171	0.000644
C05D2.15|C05D2.15	1.72	2.86	1.6626	0.334	0.564
C05D2.16|C05D2.16	3.3	0.26	0.0788	0.0255	0.0637
C05D2.17|C05D2.17	0.284	1.15	4.0339	0.255	0.456
C05D2.3|C05D2.3|C05D2.3	7.51	12.8	1.7072	0.000284	0.00103
C05D2.6|C05D2.6|C05D2.6a	1330	1370	1.0294	2.32e-05	9.8e-05
C05D2.6|C05D2.6|C05D2.6b	1130	1160	1.0333	0.00158	0.00514
C05D2.8|C05D2.8|C05D2.8	188	164	0.8697	0.0024	0.00752
C05D9.10|C05D9.10	0	0.147	Inf	1	1
C05D9.11|C05D9.11	0	0.147	Inf	1	1
C05D9.3|C05D9.3|C05D9.3	1480	1640	1.1101	0.00275	0.0085
C05D9.4|C05D9.4|C05D9.4	15	20.6	1.3716	0.408	0.655
C05D9.7|C05D9.7|C05D9.7	1140	1110	0.972	0.000348	0.00125
C05D9.9|C05D9.9|C05D9.9a	10.2	11.2	1.0992	0.669	0.923
C05D9.9|C05D9.9|C05D9.9b	19.1	22.9	1.1987	0.0975	0.205
C05E11.10|C05E11.10	60.6	68.7	1.1325	0.611	0.876
C05E11.11|C05E11.11	0.293	0.152	0.5167	0.954	1
C05E11.12|C05E11.12	0.534	1.26	2.3597	0.35	0.585
C05E11.13|C05E11.13	0	0	NaN	NA	NA
C05E11.14|C05E11.14	0.403	0.588	1.4583	1	1
C05E11.15|C05E11.15	0.293	0.299	1.0181	1	1
C05E11.16|C05E11.16	0.587	0.299	0.5086	0.79	1
C05E11.17|C05E11.17	0.415	0.322	0.776	0.946	1
C05E11.18|C05E11.18	0	0	NaN	NA	NA
C05E11.2|C05E11.2|C05E11.2	0.142	0.616	4.3383	0.767	1
C05E11.3|C05E11.3|C05E11.3	1220	1220	1.0054	0.00242	0.00758
C05E11.6|C05E11.6|C05E11.6	20.5	17.9	0.8734	0.21	0.389
C05E11.7|C05E11.7|C05E11.7	135	163	1.2016	0.000271	0.000987
C05E11.9|C05E11.9	1.82	2.56	1.4042	0.654	0.915
C05E4.12|C05E4.12|C05E4.12	103	63.2	0.6115	3.78e-10	2.67e-09
C05E4.7|C05E4.7|C05E4.7	6.64	2.78	0.4183	0.0189	0.0491
C05E7.1|C05E7.1|C05E7.1	572	649	1.1357	0.256	0.457
C05E7.2|C05E7.2|C05E7.2	444	458	1.0337	0.0532	0.122
C05E7.3|C05E7.3|C05E7.3	44.4	41.3	0.9298	0.744	0.988
C05E7.4|C05E7.4|C05E7.4	5.1	4.83	0.9472	0.979	1
C05E7.5|C05E7.5	0	0	NaN	NA	NA
C05E7.6|C05E7.6	0	0	NaN	NA	NA
C05E7.t1|C05E7.t1	0.392	0.672	1.7139	0.918	1
C05E7.t2|C05E7.t2	0.392	0.672	1.7139	0.918	1
C05E7.t3|C05E7.t3	3.98	1.62	0.407	1	1
C05G5.10|C05G5.10	0.433	0.26	0.6006	0.948	1
C05G5.1|C05G5.1|C05G5.1	363	453	1.249	6.01e-05	0.00024
C05G5.2|C05G5.2|C05G5.2	1060	962	0.9048	0.251	0.45
C05G5.3|C05G5.3|C05G5.3	446	412	0.9247	0.000306	0.0011
C05G5.4|C05G5.4|C05G5.4	4240	4350	1.0261	0.013	0.035
C05G5.5|C05G5.5|C05G5.5	520	464	0.8924	0.000328	0.00118
C05G5.7|C05G5.7|C05G5.7	8.29	10.8	1.2991	1	1
C05G5.8|C05G5.8	0	0.26	Inf	0.997	1
C05G5.9|C05G5.9	4.58	6.36	1.3896	0.0473	0.11
C05G6.4|C05G6.4	5.94	10.4	1.7568	0.012	0.0326
C05G6.5|C05G6.5	5.94	10.6	1.7823	0.00937	0.026
C05G6.t1|C05G6.t1	0.184	0.147	0.8006	1	1
C05H8.3|C05H8.3	9.86	6.34	0.6428	0.295	0.512
C05H8.4|C05H8.4	1.68	1.76	1.0486	0.824	1
C06A1.10|C06A1.10	0	0	NaN	NA	NA
C06A1.11|C06A1.11	0	0	NaN	NA	NA
C06A1.2|C06A1.2|C06A1.2	202	198	0.9816	0.0682	0.151
C06A1.3|C06A1.3|C06A1.3	7.32	5.21	0.7123	0.444	0.698
C06A1.4|C06A1.4	526	628	1.1942	3.62e-08	2.1e-07
C06A1.6|C06A1.6|C06A1.6	13.3	8.52	0.6394	0.326	0.554
C06A1.7|C06A1.7|C06A1.7	9.22	6.3	0.6833	0.661	0.915
C06A1.8|C06A1.8	1.17	1.09	0.9288	1	1
C06A1.9|C06A1.9	0	0.147	Inf	1	1
C06A12.17|C06A12.17	0	0	NaN	NA	NA
C06A12.18|C06A12.18	0	0	NaN	NA	NA
C06A12.3|C06A12.3|C06A12.3a	92.6	92.7	1.0011	0.938	1
C06A12.3|C06A12.3|C06A12.3b	141	140	0.9926	0.731	0.977
C06A12.3|C06A12.3|C06A12.3c	41.3	39.7	0.9622	0.214	0.396
C06A12.8|C06A12.8|C06A12.8	0.282	0.113	0.4013	0.955	1
C06A5.10|C06A5.10|C06A5.10	41.3	26.6	0.6437	0.000123	0.000473
C06A5.12|C06A5.12|C06A5.12	117	102	0.8691	0.0212	0.0541
C06A5.1|C06A5.1|C06A5.1	2490	2120	0.8532	0.00102	0.00341
C06A5.2|C06A5.2|C06A5.2	18.9	13.5	0.7177	1	1
C06A5.3|C06A5.3|C06A5.3a	3980	3990	1.003	0.00203	0.00644
C06A5.3|C06A5.3|C06A5.3b	1870	1880	1.0078	0.00619	0.0179
C06A5.4|C06A5.4|C06A5.4	70.7	34.6	0.4892	5.45e-13	4.78e-12
C06A5.5|C06A5.5|C06A5.5	125	84.6	0.6759	2.29e-15	2.42e-14
C06A5.6|C06A5.6|C06A5.6	1230	1810	1.474	1.27e-157	2.62e-155
C06A5.8|C06A5.8|C06A5.8a	139	139	0.9982	0.0952	0.201
C06A5.8|C06A5.8|C06A5.8b	249	241	0.9685	0.14	0.28
C06A6.10|C06A6.10	0.435	0.791	1.8164	0.894	1
C06A6.11|C06A6.11	0.435	0.791	1.8164	0.894	1
C06A6.12|C06A6.12	0.413	0.7	1.6948	1	1
C06A6.13|C06A6.13	0.413	0.7	1.6948	1	1
C06A6.14|C06A6.14	0.131	0.74	5.6598	0.61	0.875
C06A6.2|C06A6.2|C06A6.2a	1750	1840	1.0511	1.45e-05	6.31e-05
C06A6.2|C06A6.2|C06A6.2b	1790	1870	1.0456	1.83e-05	7.83e-05
C06A6.4|C06A6.4|C06A6.4a	1920	1920	0.9975	0.0394	0.0939
C06A6.4|C06A6.4|C06A6.4b	1050	1030	0.9794	0.523	0.785
C06A6.5|C06A6.5|C06A6.5	1830	1660	0.9093	1.19e-20	1.73e-19
C06A6.7|C06A6.7|C06A6.7	29.1	22.6	0.7761	0.128	0.258
C06A6.9|C06A6.9	0.131	0.147	1.1251	1	1
C06A8.13|C06A8.13	0	0	NaN	NA	NA
C06A8.14|C06A8.14	0	0	NaN	NA	NA
C06A8.15|C06A8.15	0	0	NaN	NA	NA
C06A8.16|C06A8.16	1.47	1.39	0.9437	1	1
C06A8.17|C06A8.17	2.19	0	0	0.453	0.708
C06A8.1|C06A8.1|C06A8.1a	4370	5290	1.2106	1.65e-62	9.6e-61
C06A8.1|C06A8.1|C06A8.1b	2430	2910	1.1984	5.52e-34	1.45e-32
C06A8.2|C06A8.2|C06A8.2	1270	1120	0.8833	0.00136	0.00446
C06A8.3|C06A8.3|C06A8.3	2920	2850	0.9774	9.55e-12	7.64e-11
C06A8.6|C06A8.6|C06A8.6	32.3	16.8	0.5217	2.34e-08	1.38e-07
C06A8.8|C06A8.8|C06A8.8a	467	373	0.7973	2.19e-20	3.14e-19
C06A8.8|C06A8.8|C06A8.8b	1010	807	0.7993	2.26e-48	9.47e-47
C06B3.16|C06B3.16|C06B3.16	0.693	1.14	1.6462	0.487	0.746
C06B3.1|C06B3.1|C06B3.1	1.05	1.51	1.4414	0.745	0.988
C06B3.6|C06B3.6|C06B3.6	456	486	1.0654	0.0218	0.0555
C06B3.7|C06B3.7|C06B3.7	16.3	15.8	0.9682	0.274	0.483
C06B8.11|C06B8.11|C06B8.11	0.131	0	0	0.956	1
C06B8.13|C06B8.13	0	0	NaN	NA	NA
C06B8.14|C06B8.14	0.151	0	0	0.956	1
C06B8.15|C06B8.15	7.59	6.76	0.8907	0.908	1
C06B8.2|C06B8.2|C06B8.2a	387	408	1.0539	0.591	0.857
C06B8.2|C06B8.2|C06B8.2b	885	931	1.052	0.459	0.715
C06B8.2|C06B8.2|C06B8.2c	467	479	1.0258	0.894	1
C06B8.2|C06B8.2|C06B8.2d	490	502	1.0242	0.951	1
C06B8.3|C06B8.3|C06B8.3	0.184	0.405	2.207	1	1
C06B8.7|C06B8.7|C06B8.7	4830	5210	1.0785	6.61e-09	4.13e-08
C06B8.t1|C06B8.t1	0	0	NaN	NA	NA
C06B8.t2|C06B8.t2	0	0	NaN	NA	NA
C06B8.t3|C06B8.t3	4.08	3.13	0.7658	0.587	0.852
C06C3.10|C06C3.10|C06C3.10	149	166	1.1102	0.922	1
C06C3.11|C06C3.11	57.4	65.9	1.1475	0.114	0.235
C06C3.12|C06C3.12|C06C3.12	27	30.5	1.1309	0.136	0.272
C06C3.13|C06C3.13	0	0	NaN	NA	NA
C06C3.3|C06C3.3|C06C3.3	109	114	1.0458	0.0367	0.0881
C06C3.4|C06C3.4|C06C3.4	435	458	1.0519	0.00125	0.00413
C06C3.5|C06C3.5	27.5	29.1	1.0592	0.105	0.22
C06C3.7|C06C3.7|C06C3.7	143	105	0.7292	0.134	0.268
C06C3.8|C06C3.8|C06C3.8	35.6	34.1	0.9582	0.213	0.394
C06C3.9|C06C3.9|C06C3.9	167	159	0.9528	0.000187	0.000698
C06C6.10|C06C6.10	14.6	9.81	0.6726	0.052	0.12
C06C6.1|C06C6.1|C06C6.1	1.57	1.09	0.6922	0.662	0.916
C06C6.6|C06C6.6|C06C6.6	3.86	2.11	0.5463	0.946	1
C06C6.7|C06C6.7|C06C6.7	3.85	3.69	0.9606	0.725	0.973
C06C6.8|C06C6.8|C06C6.8	1.66	2.12	1.2776	0.876	1
C06C6.9|C06C6.9|C06C6.9	0.184	0	0	0.956	1
C06E1.11|C06E1.11|C06E1.11	53.6	43.9	0.819	0.101	0.211
C06E1.12|C06E1.12	0.131	0.416	3.1848	0.947	1
C06E1.13|C06E1.13	0	0.86	Inf	0.363	0.601
C06E1.14|C06E1.14	0	0.209	Inf	1	1
C06E1.15|C06E1.15	0	0.595	Inf	0.726	0.973
C06E1.1|C06E1.1|C06E1.1	1120	992	0.8816	1.63e-07	8.8e-07
C06E1.3|C06E1.3|C06E1.3	297	369	1.2411	1.03e-07	5.67e-07
C06E1.7|C06E1.7|C06E1.7	37.2	36	0.9689	0.979	1
C06E1.9|C06E1.9|C06E1.9	802	725	0.9038	0.253	0.453
C06E2.11|C06E2.11	88.6	106	1.1955	2.36e-06	1.13e-05
C06E2.12|C06E2.12	0	0.147	Inf	1	1
C06E2.13|C06E2.13	0	0	NaN	NA	NA
C06E2.14|C06E2.14	0	0	NaN	NA	NA
C06E2.1|C06E2.1|C06E2.1	156	133	0.8565	0.000242	0.000891
C06E2.2|C06E2.2|C06E2.2	0.821	0.209	0.254	0.414	0.664
C06E2.5|C06E2.5|C06E2.5	1170	1000	0.8558	6.65e-15	6.78e-14
C06E2.9|C06E2.9|C06E2.9	13.4	13.1	0.9739	0.408	0.655
C06E4.15|C06E4.15	0.142	0.147	1.0359	1	1
C06E4.16|C06E4.16	0	0.147	Inf	1	1
C06E4.17|C06E4.17	0	0	NaN	NA	NA
C06E4.18|C06E4.18	0	0.407	Inf	0.877	1
C06E4.19|C06E4.19	0.435	1.37	3.1369	0.198	0.373
C06E4.1|C06E4.1|C06E4.1	0.131	0.299	2.2845	1	1
C06E4.20|C06E4.20	0.392	0.994	2.5345	0.555	0.819
C06E4.21|C06E4.21	0	0	NaN	NA	NA
C06E4.2|C06E4.2|C06E4.2	172	163	0.9453	0.000415	0.00147
C06E4.3|C06E4.3|C06E4.3	18.8	16.1	0.856	0.165	0.32
C06E4.4|C06E4.4|C06E4.4	0.151	0.706	4.665	0.618	0.884
C06E4.5|C06E4.5|C06E4.5	0.796	0.147	0.1849	0.389	0.633
C06E4.6|C06E4.6|C06E4.6	11	22.7	2.0565	2.89e-05	0.000121
C06E4.8|C06E4.8|C06E4.8	7.07	7.64	1.0813	0.584	0.85
C06E4.t1|C06E4.t1	0.392	0.672	1.7139	0.918	1
C06E7.2|C06E7.2|C06E7.2	780	629	0.8072	2.65e-15	2.79e-14
C06E7.4|C06E7.4|C06E7.4	1400	1630	1.1625	4.57e-10	3.2e-09
C06E7.88|C06E7.88|C06E7.88	656	716	1.0918	0.619	0.885
C06E7.89|C06E7.89	0.151	0	0	0.956	1
C06E7.90|C06E7.90	0	0.356	Inf	0.958	1
C06E7.91|C06E7.91	0	0	NaN	NA	NA
C06E7.92|C06E7.92	0.151	0	0	0.956	1
C06E7.93|C06E7.93	3.73	1.66	0.4438	0.274	0.482
C06E7.94|C06E7.94	0	0	NaN	NA	NA
C06E8.5|C06E8.5|C06E8.5	193	110	0.5724	4.75e-21	7.07e-20
C06E8.6|C06E8.6	0	0	NaN	NA	NA
C06E8.7|C06E8.7	0.131	0.147	1.1251	1	1
C06G1.10|C06G1.10	16	20	1.2483	0.0508	0.117
C06G1.11|C06G1.11	3.51	3.46	0.9873	0.753	0.994
C06G1.12|C06G1.12	2.12	3.68	1.7335	0.401	0.647
C06G1.13|C06G1.13	0.151	0.226	1.496	1	1
C06G1.14|C06G1.14	0	0.147	Inf	1	1
C06G1.15|C06G1.15	3.51	3.17	0.9034	0.986	1
C06G1.16|C06G1.16	2.94	2.27	0.7718	1	1
C06G1.17|C06G1.17	2.15	3.88	1.8041	0.164	0.318
C06G1.1|C06G1.1|C06G1.1a	929	1140	1.2232	6.82e-11	5.08e-10
C06G1.1|C06G1.1|C06G1.1b	1110	1300	1.1801	9.32e-09	5.75e-08
C06G1.2|C06G1.2|C06G1.2	381	445	1.1684	2.22e-05	9.4e-05
C06G1.5|C06G1.5|C06G1.5	1380	1610	1.1658	5.49e-09	3.46e-08
C06G1.6|C06G1.6|C06G1.6	991	1200	1.2142	1.71e-14	1.69e-13
C06G1.7|C06G1.7	0	0.294	Inf	0.985	1
C06G1.8|C06G1.8	1.06	3.51	3.3226	0.0152	0.0402
C06G1.9|C06G1.9	0.131	0.147	1.1251	1	1
C06G1.t1|C06G1.t1	1.72	1.34	0.7775	0.511	0.772
C06G1.t2|C06G1.t2	1.96	2.75	1.4066	0.798	1
C06G1.t3|C06G1.t3	1.96	2.75	1.4066	0.798	1
C06G1.t4|C06G1.t4	1.54	0.588	0.3816	1	1
C06G3.3|C06G3.3|C06G3.3	8.73	6.36	0.7279	0.657	0.915
C06G3.4|C06G3.4|C06G3.4	2.74	3.03	1.1049	1	1
C06G3.5|C06G3.5|C06G3.5a	1310	1310	0.9973	4.79e-06	2.21e-05
C06G3.5|C06G3.5|C06G3.5b	2320	2330	1.0053	4.32e-09	2.75e-08
C06G3.6|C06G3.6|C06G3.6	2710	2580	0.951	2.86e-08	1.67e-07
C06G3.8|C06G3.8|C06G3.8	425	346	0.8147	5.06e-12	4.14e-11
C06G3.9|C06G3.9|C06G3.9	3270	3370	1.0284	1.64e-08	9.84e-08
C06G4.1|C06G4.1|C06G4.1	997	911	0.9137	0.333	0.563
C06G4.4|C06G4.4|C06G4.4	16.2	14.5	0.8946	0.56	0.824
C06G4.6|C06G4.6|C06G4.6	31.6	32.9	1.0424	0.991	1
C06G4.7|C06G4.7	2.07	1.91	0.9192	0.946	1
C06G4.t1|C06G4.t1	2.07	1.79	0.8646	0.801	1
C06G8.1|C06G8.1|C06G8.1	485	434	0.8943	0.0232	0.0586
C06G8.3|C06G8.3	365	382	1.0488	0.741	0.986
C06G8.3|C06G8.3|C06G8.3b	333	360	1.082	0.216	0.399
C06G8.3|C06G8.3|C06G8.3c	360	385	1.0711	0.471	0.728
C06H2.10|C06H2.10	0.131	0.152	1.1594	1	1
C06H2.2|C06H2.2|C06H2.2	931	765	0.8213	2.6e-19	3.52e-18
C06H2.3|C06H2.3|C06H2.3	1170	1030	0.8806	4.9e-15	5.06e-14
C06H2.6|C06H2.6|C06H2.6	1110	1010	0.9105	5.17e-12	4.23e-11
C06H2.7|C06H2.7|C06H2.7	1070	835	0.7832	7.79e-07	3.92e-06
C06H2.9|C06H2.9	0	0	NaN	NA	NA
C06H5.6|C06H5.6|C06H5.6	409	425	1.039	0.167	0.324
C06H5.7|C06H5.7|C06H5.7	1220	1360	1.1159	0.171	0.328
C06H5.8|C06H5.8|C06H5.8	86.1	99	1.1495	0.018	0.047
C06H5.9|C06H5.9	0.184	0.147	0.8006	1	1
C07A12.10|C07A12.10	0.131	0.525	4.0165	0.822	1
C07A12.11|C07A12.11	0.131	0	0	0.956	1
C07A12.12|C07A12.12	0	0.303	Inf	0.981	1
C07A12.13|C07A12.13	0.151	0.553	3.6508	0.898	1
C07A12.14|C07A12.14	0.433	0.582	1.3431	1	1
C07A12.15|C07A12.15	0	0.559	Inf	0.693	0.945
C07A12.16|C07A12.16	0	0.152	Inf	1	1
C07A12.17|C07A12.17	0.142	0.147	1.0359	1	1
C07A12.2|C07A12.2|C07A12.2	3.8	4.69	1.2317	1	1
C07A12.7|C07A12.7|C07A12.7a	2870	3050	1.0655	0.105	0.22
C07A12.7|C07A12.7|C07A12.7b	1200	1290	1.075	0.34	0.572
C07A12.7|C07A12.7|C07A12.7c	1840	1940	1.0562	0.985	1
C07A12.9|C07A12.9	0	0	NaN	NA	NA
C07A4.2|C07A4.2|C07A4.2	57.5	54.1	0.9419	0.0193	0.0499
C07A4.3|C07A4.3|C07A4.3	0.576	1.88	3.2721	0.169	0.326
C07A4.4|C07A4.4	1.04	0.776	0.7455	0.648	0.911
C07A4.5|C07A4.5	0	0	NaN	NA	NA
C07A4.6|C07A4.6	0	0	NaN	NA	NA
C07A4.7|C07A4.7	0.911	0.776	0.8524	0.876	1
C07A4.8|C07A4.8	0	0	NaN	NA	NA
C07A4.9|C07A4.9	0	0.446	Inf	0.847	1
C07A9.10|C07A9.10|C07A9.10	3.87	8.48	2.1892	0.00221	0.00698
C07A9.12|C07A9.12|C07A9.12	276	260	0.9438	0.000454	0.0016
C07A9.13|C07A9.13|C07A9.13	98.8	114	1.1514	0.59	0.856
C07A9.14|C07A9.14	4.81	3.82	0.7947	0.665	0.919
C07A9.15|C07A9.15	1.69	0.593	0.3501	0.882	1
C07A9.16|C07A9.16	3.07	4.63	1.5106	0.604	0.87
C07A9.2|C07A9.2|C07A9.2	1500	1370	0.9147	2.13e-07	1.13e-06
C07A9.5|C07A9.5|C07A9.5	109	157	1.4359	8.17e-13	7.07e-12
C07A9.8|C07A9.8|C07A9.8	10.9	15.4	1.4171	0.0813	0.176
C07A9.9|C07A9.9|C07A9.9	374	360	0.9624	0.301	0.521
C07B5.2|C07B5.2|C07B5.2	7.66	2.36	0.3088	0.0474	0.111
C07B5.3|C07B5.3|C07B5.3	12.2	13.2	1.0813	0.904	1
C07B5.4|C07B5.4|C07B5.4a	791	874	1.1051	0.000763	0.0026
C07B5.4|C07B5.4|C07B5.4b	585	665	1.1367	1.42e-05	6.2e-05
C07B5.6|C07B5.6|C07B5.6	75.9	58.4	0.7689	0.000814	0.00276
C07B5.8|C07B5.8|C07B5.8	37.9	35.1	0.9267	0.885	1
C07B5.9|C07B5.9	1.7	2.83	1.6653	0.418	0.669
C07C7.1|C07C7.1|C07C7.1	20.7	17.6	0.8509	0.306	0.526
C07D10.1|C07D10.1|C07D10.1	321	360	1.1205	0.0232	0.0587
C07D10.5|C07D10.5|C07D10.5	4350	3850	0.8852	9.62e-17	1.11e-15
C07D10.6|C07D10.6|C07D10.6	9.89	6.43	0.65	0.0987	0.207
C07D8.2|C07D8.2	12.9	6.42	0.4975	0.0308	0.0755
C07D8.5|C07D8.5|C07D8.5	0	0.209	Inf	1	1
C07D8.6|C07D8.6|C07D8.6	1790	1780	0.9978	0.00228	0.00718
C07E3.10|C07E3.10|C07E3.10	218	233	1.0679	0.584	0.85
C07E3.13|C07E3.13	0	0	NaN	NA	NA
C07E3.14|C07E3.14	0	0	NaN	NA	NA
C07E3.15|C07E3.15	0	0	NaN	NA	NA
C07E3.16|C07E3.16	0	0	NaN	NA	NA
C07E3.3|C07E3.3|C07E3.3	669	851	1.2707	2.17e-15	2.29e-14
C07E3.4|C07E3.4|C07E3.4	39.4	32.4	0.8219	0.264	0.468
C07E3.6|C07E3.6|C07E3.6	1090	1190	1.0879	0.00362	0.0109
C07E3.8|C07E3.8|C07E3.8	45.4	23.9	0.5263	6.06e-08	3.43e-07
C07E3.9|C07E3.9|C07E3.9	245	254	1.0338	0.154	0.303
C07F11.2|C07F11.2|C07F11.2	64.6	65.1	1.0085	0.196	0.369
C07G1.10|C07G1.10	0	0.147	Inf	1	1
C07G1.11|C07G1.11	0.608	0.299	0.4914	0.784	1
C07G1.12|C07G1.12	1.85	1.02	0.5518	0.182	0.346
C07G1.13|C07G1.13	1.55	0.299	0.1926	0.6	0.866
C07G1.14|C07G1.14	1.6	4.41	2.7611	0.0153	0.0406
C07G1.2|C07G1.2|C07G1.2	46.7	48.7	1.0436	0.0414	0.0981
C07G1.6|C07G1.6|C07G1.6	2.29	4.08	1.7764	0.346	0.58
C07G1.7|C07G1.7|C07G1.7	6.32	3.23	0.5111	0.187	0.355
C07G2.4|C07G2.4	3.06	1.76	0.5739	0.101	0.211
C07G3.10|C07G3.10|C07G3.10	9.04	11.7	1.2927	0.337	0.568
C07G3.13|C07G3.13	0.273	0	0	0.905	1
C07G3.8|C07G3.8|C07G3.8	11	12.5	1.1322	0.795	1
C07H4.1|C07H4.1|C07H4.1	155	153	0.9907	0.88	1
C07H4.3|C07H4.3	0.261	0.79	3.021	0.619	0.884
C07H4.4|C07H4.4	0.261	0.152	0.5797	0.955	1
C07H6.10|C07H6.10	0.523	0.26	0.4978	0.818	1
C07H6.11|C07H6.11	0.131	0.292	2.2355	1	1
C07H6.12|C07H6.12	0.575	0	0	0.591	0.856
C07H6.13|C07H6.13	0.261	0.672	2.5708	0.775	1
C07H6.14|C07H6.14	0	0	NaN	NA	NA
C07H6.15|C07H6.15	0.413	1.55	3.7555	0.131	0.263
C07H6.16|C07H6.16	0.424	0	0	0.775	1
C07H6.17|C07H6.17	0.131	0.941	7.2013	0.333	0.563
C07H6.18|C07H6.18	0.142	0.113	0.7973	1	1
C07H6.2|C07H6.2|C07H6.2	487	427	0.8771	1.38e-08	8.38e-08
C07H6.4|C07H6.4|C07H6.4	2630	2490	0.9471	0.155	0.305
C07H6.9|C07H6.9|C07H6.9	66.5	41.2	0.6201	2.6e-06	1.24e-05
C08A9.10|C08A9.10|C08A9.10	4.39	7.93	1.8077	0.039	0.0931
C08A9.11|C08A9.11	0.911	1.59	1.7474	0.58	0.845
C08A9.12|C08A9.12	0.184	0.698	3.7977	0.846	1
C08A9.2|C08A9.2	34.9	26	0.7434	0.561	0.826
C08A9.3|C08A9.3|C08A9.3a	6.3	8.83	1.4007	0.144	0.286
C08A9.3|C08A9.3|C08A9.3b	5.06	6.9	1.3655	0.335	0.565
C08A9.6|C08A9.6|C08A9.6	408	353	0.8654	0.0299	0.0736
C08A9.8|C08A9.8|C08A9.8	88.9	71.7	0.8071	0.833	1
C08A9.9|C08A9.9|C08A9.9	18.1	19.7	1.0884	0.57	0.834
C08B11.11|C08B11.11	0.284	0.79	2.7814	0.608	0.873
C08B11.12|C08B11.12	0.545	0.668	1.2241	1	1
C08B11.13|C08B11.13	0	0	NaN	NA	NA
C08B11.3|C08B11.3|C08B11.3	11500	11400	0.9981	3.63e-17	4.31e-16
C08B11.6|C08B11.6|C08B11.6	2260	1900	0.8392	1.17e-22	1.9e-21
C08B11.8|C08B11.8|C08B11.8	721	602	0.8355	9.43e-08	5.23e-07
C08B11.9|C08B11.9|C08B11.9	677	629	0.9294	0.000446	0.00157
C08B6.10|C08B6.10|C08B6.10	46.5	51	1.0945	0.619	0.884
C08B6.11|C08B6.11|C08B6.11	210	188	0.8924	0.000195	0.000726
C08B6.14|C08B6.14|C08B6.14	0.261	0.147	0.5625	0.955	1
C08B6.15|C08B6.15	5.43	4.69	0.8627	0.72	0.969
C08B6.16|C08B6.16	0.445	1.13	2.5488	0.484	0.743
C08B6.17|C08B6.17	193	237	1.2274	0.00451	0.0134
C08B6.2|C08B6.2|C08B6.2a	2.54	5.11	2.0114	0.0153	0.0406
C08B6.2|C08B6.2|C08B6.2b	2.54	5	1.9668	0.0216	0.0551
C08B6.2|C08B6.2|C08B6.2c	2.67	5.29	1.98	0.0263	0.0655
C08B6.3|C08B6.3|C08B6.3	261	249	0.9512	0.78	1
C08B6.4|C08B6.4|C08B6.4a	2040	2760	1.3533	4.73e-74	3.42e-72
C08B6.4|C08B6.4|C08B6.4b	2070	2790	1.3428	1.84e-67	1.21e-65
C08B6.5|C08B6.5|C08B6.5	12.9	14.4	1.1151	0.972	1
C08B6.6|C08B6.6|C08B6.6	1.68	1.92	1.1409	1	1
C08B6.7|C08B6.7|C08B6.7a	3960	4190	1.0578	7.63e-23	1.25e-21
C08B6.7|C08B6.7|C08B6.7b	2190	2290	1.0451	1.75e-09	1.16e-08
C08B6.8|C08B6.8|C08B6.8	803	675	0.84	2.11e-14	2.06e-13
C08C3.10|C08C3.10	0	0	NaN	NA	NA
C08C3.11|C08C3.11	0	0.209	Inf	1	1
C08C3.4|C08C3.4|C08C3.4a	468	422	0.902	0.0118	0.0322
C08C3.4|C08C3.4|C08C3.4b	391	349	0.8917	0.00263	0.00818
C08C3.6|C08C3.6	0	0	NaN	NA	NA
C08C3.7|C08C3.7	0	0.209	Inf	1	1
C08C3.8|C08C3.8	0.151	0	0	0.956	1
C08C3.9|C08C3.9	0.151	0.113	0.748	1	1
C08D8.1|C08D8.1|C08D8.1	10.5	11.1	1.061	0.875	1
C08D8.3|C08D8.3	0.314	0.446	1.4175	1	1
C08D8.4|C08D8.4	0	0	NaN	NA	NA
C08D8.5|C08D8.5	0.131	0.378	2.8914	0.958	1
C08D8.6|C08D8.6	0	0	NaN	NA	NA
C08E3.13|C08E3.13|C08E3.13	33.9	30.6	0.9039	0.317	0.542
C08E3.14|C08E3.14|C08E3.14	0	0	NaN	NA	NA
C08E3.15|C08E3.15|C08E3.15	0.142	0.152	1.0675	1	1
C08E3.1|C08E3.1|C08E3.1	11.3	14.7	1.2927	0.453	0.707
C08E8.10|C08E8.10|C08E8.10	50.6	65	1.2842	0.0668	0.148
C08E8.11|C08E8.11|C08E8.11	0	0	NaN	NA	NA
C08E8.12|C08E8.12	0	0	NaN	NA	NA
C08E8.13|C08E8.13	0	0	NaN	NA	NA
C08E8.14|C08E8.14	0	0	NaN	NA	NA
C08E8.15|C08E8.15	0	0	NaN	NA	NA
C08E8.1|C08E8.1|C08E8.1	10.1	17.5	1.7356	0.0136	0.0364
C08E8.2|C08E8.2|C08E8.2	1.89	0.62	0.3284	0.0303	0.0745
C08E8.3|C08E8.3|C08E8.3	21.6	38.2	1.7709	0.00195	0.00621
C08E8.4|C08E8.4|C08E8.4	25.4	29.5	1.1634	0.514	0.776
C08E8.5|C08E8.5|C08E8.5	0.587	0.65	1.1068	1	1
C08E8.6|C08E8.6|C08E8.6	2.76	2.56	0.927	0.422	0.673
C08E8.7|C08E8.7	5.41	6.53	1.2084	0.898	1
C08E8.8|C08E8.8	1.07	0.487	0.4531	0.509	0.772
C08E8.9|C08E8.9|C08E8.9	2.76	2.46	0.8925	0.422	0.673
C08E8.t1|C08E8.t1	0	0	NaN	NA	NA
C08E8.t2|C08E8.t2	0	0	NaN	NA	NA
C08E8.t3|C08E8.t3	0	0	NaN	NA	NA
C08F1.10|C08F1.10|C08F1.10	1990	1760	0.8857	3.58e-28	7.59e-27
C08F1.11|C08F1.11|C08F1.11	904	830	0.9182	3.43e-10	2.43e-09
C08F1.6|C08F1.6|C08F1.6	1640	1480	0.9035	1.12e-14	1.12e-13
C08F1.8|C08F1.8|C08F1.8	223	186	0.8361	0.357	0.594
C08F11.10|C08F11.10|C08F11.10	6.1	7.88	1.2928	0.866	1
C08F11.116|C08F11.116	0.151	0.521	3.4397	0.813	1
C08F11.11|C08F11.11|C08F11.11	1.73	77.9	44.9354	5.88e-129	9.9e-127
C08F11.12|C08F11.12|C08F11.12	0	28.5	Inf	7.14e-55	3.49e-53
C08F11.13|C08F11.13|C08F11.13	1060	868	0.8172	2.08e-58	1.1e-56
C08F11.14|C08F11.14	1.65	0.439	0.266	0.378	0.619
C08F11.16|C08F11.16	1.05	1.15	1.0963	1	1
C08F11.17|C08F11.17|C08F11.17	0	0.36	Inf	0.956	1
C08F11.18|C08F11.18	0	0	NaN	NA	NA
C08F11.19|C08F11.19	0	0	NaN	NA	NA
C08F11.1|C08F11.1|C08F11.1	9.46	9.57	1.012	0.484	0.743
C08F11.2|C08F11.2|C08F11.2	0.184	0.53	2.8873	0.895	1
C08F11.3|C08F11.3|C08F11.3	0.367	0.732	1.9911	1	1
C08F11.6|C08F11.6	16.1	17.3	1.0705	0.76	0.999
C08F11.7|C08F11.7|C08F11.7	6.72	9.73	1.4478	0.0194	0.0501
C08F8.10|C08F8.10	0.131	0.265	2.0254	1	1
C08F8.11|C08F8.11	1.41	0.503	0.3563	1	1
C08F8.12|C08F8.12	0.466	0.209	0.4479	0.807	1
C08F8.13|C08F8.13	0.151	1.15	7.5863	0.127	0.258
C08F8.14|C08F8.14	0.426	0.736	1.728	1	1
C08F8.2|C08F8.2|C08F8.2a	891	744	0.8353	5.2e-05	0.00021
C08F8.2|C08F8.2|C08F8.2b	836	710	0.8484	6.15e-05	0.000245
C08F8.3|C08F8.3|C08F8.3	1150	1040	0.9055	0.117	0.24
C08F8.6|C08F8.6|C08F8.6	88.6	71.5	0.8063	0.301	0.52
C08F8.9|C08F8.9|C08F8.9	210	203	0.9682	0.375	0.615
C08G5.1|C08G5.1|C08G5.1	0.932	2.17	2.3281	0.241	0.437
C08G5.3|C08G5.3|C08G5.3	11	8.13	0.7399	0.43	0.682
C08G5.5|C08G5.5|C08G5.5	320	377	1.1768	0.105	0.22
C08G5.6|C08G5.6|C08G5.6	14.1	13.3	0.9369	0.9	1
C08G5.7|C08G5.7|C08G5.7a	57	71.5	1.2536	0.074	0.162
C08G5.7|C08G5.7|C08G5.7b	56.7	71.3	1.256	0.067	0.149
C08G5.9|C08G5.9	0	0.152	Inf	1	1
C08G9.10|C08G9.10	0.131	0	0	0.956	1
C08G9.1|C08G9.1|C08G9.1	356	371	1.0402	0.973	1
C08G9.2|C08G9.2|C08G9.2	1000	1160	1.1548	1.31e-17	1.61e-16
C08G9.4|C08G9.4	0	1.52	Inf	0.0065	0.0187
C08G9.5|C08G9.5	0.61	0.584	0.9587	0.708	0.957
C08G9.6|C08G9.6	2.65	1.56	0.587	0.398	0.644
C08G9.7|C08G9.7	0	0.729	Inf	0.473	0.732
C08G9.8|C08G9.8	0	0	NaN	NA	NA
C08G9.9|C08G9.9	0	0	NaN	NA	NA
C08H9.10|C08H9.10|C08H9.10	1.55	1.35	0.8689	0.659	0.915
C08H9.11|C08H9.11|C08H9.11	0.924	0.469	0.5074	0.529	0.791
C08H9.12|C08H9.12|C08H9.12	1.23	0.938	0.7641	0.654	0.915
C08H9.13|C08H9.13|C08H9.13	3.81	4.59	1.2054	0.566	0.83
C08H9.14|C08H9.14|C08H9.14	0.849	0.971	1.144	1	1
C08H9.15|C08H9.15|C08H9.15	252	241	0.9555	0.0563	0.128
C08H9.16|C08H9.16|C08H9.16	640	576	0.8994	0.692	0.944
C08H9.1|C08H9.1|C08H9.1	27.1	22.9	0.8431	0.198	0.372
C08H9.2|C08H9.2|C08H9.2a	8390	9300	1.1086	5.86e-12	4.78e-11
C08H9.2|C08H9.2|C08H9.2b	13600	15200	1.1172	2.57e-21	3.88e-20
C08H9.3|C08H9.3|C08H9.3a	677	609	0.8994	0.000281	0.00102
C08H9.3|C08H9.3|C08H9.3b	268	252	0.9384	0.205	0.382
C08H9.4|C08H9.4|C08H9.4a	6.88	2.51	0.3651	0.534	0.795
C08H9.4|C08H9.4|C08H9.4b	3.71	2.8	0.7528	0.517	0.778
C08H9.6|C08H9.6|C08H9.6	2.25	2.59	1.1507	0.787	1
C08H9.7|C08H9.7|C08H9.7	1.69	0.682	0.4028	0.882	1
C08H9.8|C08H9.8	0.284	0	0	0.9	1
C08H9.9|C08H9.9	2.94	1.8	0.6108	0.808	1
C09B7.10|C09B7.10	0	0	NaN	NA	NA
C09B7.11|C09B7.11	0	0	NaN	NA	NA
C09B7.12|C09B7.12	0	0	NaN	NA	NA
C09B7.2|C09B7.2|C09B7.2	571	574	1.005	0.0253	0.0632
C09B7.3|C09B7.3	0	0.152	Inf	1	1
C09B7.4|C09B7.4	0.273	0.446	1.6344	1	1
C09B7.5|C09B7.5	0	0	NaN	NA	NA
C09B7.6|C09B7.6	0.184	0.491	2.6737	0.811	1
C09B7.7|C09B7.7	0	0	NaN	NA	NA
C09B7.8|C09B7.8	0	0.152	Inf	1	1
C09B7.9|C09B7.9	0	0	NaN	NA	NA
C09B8.10|C09B8.10	0.142	0.45	3.1708	0.933	1
C09B8.11|C09B8.11	0.413	0.564	1.367	1	1
C09B8.12|C09B8.12	8.07	10.8	1.3374	0.146	0.288
C09B8.13|C09B8.13	0.142	0.62	4.3699	0.765	1
C09B8.14|C09B8.14	0.413	0.564	1.367	1	1
C09B8.15|C09B8.15	0	0.299	Inf	0.983	1
C09B8.16|C09B8.16	0	0.299	Inf	0.983	1
C09B8.17|C09B8.17	0	0.147	Inf	1	1
C09B8.18|C09B8.18	0.913	0.265	0.2901	0.434	0.687
C09B8.3|C09B8.3|C09B8.3	152	142	0.9329	0.0198	0.0512
C09B8.4|C09B8.4|C09B8.4	695	662	0.9523	0.15	0.296
C09B8.5|C09B8.5|C09B8.5	755	594	0.7869	5.97e-13	5.22e-12
C09B8.8|C09B8.8|C09B8.8	15.1	20.5	1.3623	0.179	0.342
C09B9.1|C09B9.1|C09B9.1	2.32	1.78	0.7672	0.521	0.782
C09B9.2|C09B9.2|C09B9.2	0.608	2.08	3.4204	0.115	0.235
C09B9.3|C09B9.3|C09B9.3a	20.4	27.4	1.3478	0.451	0.705
C09B9.3|C09B9.3|C09B9.3b	1.6	2.65	1.6537	0.709	0.958
C09B9.4|C09B9.4|C09B9.4	0.326	0.356	1.0921	1	1
C09B9.7|C09B9.7|C09B9.7	9.11	8.57	0.9408	0.874	1
C09B9.80|C09B9.80	1.4	0.706	0.5045	0.834	1
C09B9.81|C09B9.81	0	0	NaN	NA	NA
C09B9.82|C09B9.82	0.131	0.698	5.3371	0.861	1
C09B9.83|C09B9.83	0	0	NaN	NA	NA
C09B9.84|C09B9.84	0.131	0	0	0.956	1
C09B9.8|C09B9.8|C09B9.8	141	135	0.9585	0.51	0.772
C09B9.t1|C09B9.t1	0	0.593	Inf	0.66	0.915
C09C7.2|C09C7.2	0	0.147	Inf	1	1
C09D1.4|C09D1.4	0	0	NaN	NA	NA
C09D1.5|C09D1.5	0	0	NaN	NA	NA
C09D4.1|C09D4.1|C09D4.1a	794	760	0.9571	2.5e-08	1.47e-07
C09D4.1|C09D4.1|C09D4.1b	719	731	1.0165	0.0129	0.0347
C09D4.2|C09D4.2|C09D4.2	237	186	0.784	0.000146	0.000554
C09D4.3|C09D4.3|C09D4.3	35	37.2	1.0635	0.654	0.915
C09D4.4|C09D4.4|C09D4.4a	1720	1590	0.9237	0.677	0.931
C09D4.4|C09D4.4|C09D4.4b	1710	1580	0.9238	0.613	0.878
C09D4.4|C09D4.4|C09D4.4c	1890	1750	0.9217	0.939	1
C09D4.6|C09D4.6|C09D4.6	8.44	6.86	0.8124	0.434	0.688
C09D4.8|C09D4.8	0	0.147	Inf	1	1
C09D8.10|C09D8.10	0	0	NaN	NA	NA
C09D8.11|C09D8.11	5.16	5.47	1.0589	0.939	1
C09D8.12|C09D8.12	0	0	NaN	NA	NA
C09D8.13|C09D8.13	1.73	1.89	1.0921	0.816	1
C09D8.14|C09D8.14	3.34	3.99	1.194	0.241	0.437
C09D8.15|C09D8.15	1.13	1.75	1.5484	0.516	0.778
C09D8.2|C09D8.2	0	0.113	Inf	1	1
C09D8.3|C09D8.3	0.151	0.6	3.9639	0.688	0.941
C09D8.4|C09D8.4	0.326	0	0	0.883	1
C09D8.5|C09D8.5	0	0.113	Inf	1	1
C09D8.6|C09D8.6	0	0	NaN	NA	NA
C09D8.7|C09D8.7	3.95	6.9	1.7453	0.00414	0.0124
C09D8.8|C09D8.8	3.76	3.86	1.0253	0.834	1
C09D8.9|C09D8.9	0	0	NaN	NA	NA
C09E7.10|C09E7.10|C09E7.10	9.57	12.3	1.2887	0.47	0.727
C09E7.4|C09E7.4|C09E7.4	1680	1650	0.9829	0.00728	0.0208
C09E7.5|C09E7.5|C09E7.5	10.8	8.27	0.7694	0.176	0.337
C09E7.6|C09E7.6|C09E7.6	44	36.8	0.8363	0.812	1
C09E7.7|C09E7.7|C09E7.7	3050	2780	0.9104	0.182	0.347
C09E7.8|C09E7.8|C09E7.8a	735	699	0.9511	3.31e-06	1.55e-05
C09E7.8|C09E7.8|C09E7.8b	714	678	0.9501	6.41e-06	2.91e-05
C09E7.9|C09E7.9|C09E7.9	476	422	0.8873	0.251	0.45
C09E8.1|C09E8.1|C09E8.1a	1170	1190	1.0121	0.264	0.468
C09E8.1|C09E8.1|C09E8.1b	1040	1070	1.0265	0.946	1
C09E9.1|C09E9.1|C09E9.1	445	368	0.8285	1.59e-07	8.58e-07
C09F12.2|C09F12.2|C09F12.2	25.3	25.2	0.994	0.907	1
C09F12.3|C09F12.3|C09F12.3	19.8	20.7	1.0481	0.496	0.756
C09F12.6|C09F12.6	26	39.3	1.5127	0.000855	0.00289
C09F5.1|C09F5.1|C09F5.1	1940	2330	1.1998	1.53e-15	1.64e-14
C09F5.3|C09F5.3|C09F5.3	35.4	43.3	1.2217	0.217	0.4
C09F9.1|C09F9.1|C09F9.1	25	23.7	0.95	0.678	0.932
C09F9.2|C09F9.2|C09F9.2	6700	7790	1.1624	3.57e-16	3.98e-15
C09F9.4|C09F9.4	1150	1290	1.1179	0.0899	0.192
C09F9.7|C09F9.7	97.3	124	1.2748	0.0148	0.0395
C09F9.8|C09F9.8	2.99	2.45	0.817	0.342	0.574
C09G1.2|C09G1.2|C09G1.2	21.1	11.2	0.5293	0.509	0.772
C09G1.3|C09G1.3|C09G1.3	8.15	6.38	0.7825	0.637	0.902
C09G1.4|C09G1.4|C09G1.4	415	441	1.0632	0.0886	0.189
C09G1.5|C09G1.5|C09G1.5	344	321	0.9309	0.0253	0.0632
C09G1.6|C09G1.6	0	0.147	Inf	1	1
C09G12.17|C09G12.17|C09G12.17	4.65	5.74	1.2367	0.351	0.586
C09G12.18|C09G12.18	0	0	NaN	NA	NA
C09G12.19|C09G12.19	38.3	27.9	0.729	0.0787	0.171
C09G12.5|C09G12.5|C09G12.5	0	0.147	Inf	1	1
C09G12.t1|C09G12.t1	19.1	14.7	0.7695	0.331	0.56
C09G4.2|C09G4.2|C09G4.2a	888	1070	1.2098	2.21e-08	1.31e-07
C09G4.2|C09G4.2|C09G4.2b	1540	1890	1.2265	1.43e-15	1.53e-14
C09G4.2|C09G4.2|C09G4.2c	1160	1390	1.1922	6.02e-06	2.74e-05
C09G4.2|C09G4.2|C09G4.2d	2780	3330	1.1981	4.51e-18	5.7e-17
C09G4.4|C09G4.4|C09G4.4	252	204	0.8087	1.8e-05	7.72e-05
C09G5.10|C09G5.10	0	0	NaN	NA	NA
C09G5.11|C09G5.11	0.142	0.519	3.6529	0.911	1
C09G5.12|C09G5.12	0	0	NaN	NA	NA
C09G5.7|C09G5.7|C09G5.7	28.3	16.5	0.5851	1.71e-05	7.36e-05
C09G5.8|C09G5.8	31.5	30.7	0.9734	0.278	0.488
C09G5.8|C09G5.8|C09G5.8a	686	774	1.1289	1.42e-13	1.3e-12
C09G5.8|C09G5.8|C09G5.8b	592	666	1.1252	1.44e-12	1.23e-11
C09G9.1|C09G9.1|C09G9.1	2190	2180	0.9949	0.641	0.905
C09G9.2|C09G9.2|C09G9.2a	1090	963	0.8825	0.00019	0.000709
C09G9.2|C09G9.2|C09G9.2b	3200	2800	0.8757	6.02e-14	5.69e-13
C09G9.3|C09G9.3|C09G9.3a	25.7	22.1	0.8608	0.0275	0.0681
C09G9.3|C09G9.3|C09G9.3b	23.3	20.9	0.8947	0.0871	0.187
C09G9.5|C09G9.5|C09G9.5a	156	179	1.1464	0.703	0.954
C09G9.5|C09G9.5|C09G9.5b	75.7	86.4	1.141	0.786	1
C09G9.8|C09G9.8|C09G9.8a	0.131	0.113	0.866	0.997	1
C09G9.8|C09G9.8|C09G9.8b	0.131	0.113	0.866	0.997	1
C09G9.9|C09G9.9	0.131	0	0	0.956	1
C09H10.10|C09H10.10|C09H10.10	336	311	0.9249	0.282	0.494
C09H10.11|C09H10.11	0.314	1.46	4.638	0.0569	0.129
C09H10.12|C09H10.12	0.142	0	0	0.956	1
C09H10.13|C09H10.13	0.717	1.48	2.07	0.398	0.644
C09H10.14|C09H10.14	0	0	NaN	NA	NA
C09H10.15|C09H10.15	0.131	0	0	0.956	1
C09H10.16|C09H10.16	0	0	NaN	NA	NA
C09H10.17|C09H10.17	0.314	0.152	0.482	0.954	1
C09H10.18|C09H10.18	0.142	0.614	4.3248	0.882	1
C09H10.5|C09H10.5|C09H10.5	464	512	1.1034	5.55e-06	2.54e-05
C09H10.7|C09H10.7|C09H10.7	680	704	1.035	0.0147	0.039
C09H10.9|C09H10.9|C09H10.9	15.4	14	0.91	1	1
C09H5.1|C09H5.1|C09H5.1	0	0	NaN	NA	NA
C09H5.7|C09H5.7|C09H5.7	0.151	0	0	0.956	1
C10A4.10|C10A4.10|C10A4.10	50.6	43.9	0.8668	0.0475	0.111
C10A4.11|C10A4.11	0.142	0	0	0.956	1
C10A4.12|C10A4.12	0	0	NaN	NA	NA
C10A4.1|C10A4.1|C10A4.1	30.9	27.3	0.884	0.415	0.665
C10A4.2|C10A4.2|C10A4.2	0.151	0.734	4.8477	0.601	0.867
C10A4.3|C10A4.3|C10A4.3	203	211	1.0392	0.0602	0.136
C10A4.4|C10A4.4|C10A4.4	0.415	1.17	2.8177	0.483	0.742
C10A4.5|C10A4.5|C10A4.5	87.4	73.5	0.8416	0.268	0.475
C10A4.6|C10A4.6|C10A4.6	0.768	1.6	2.0867	0.398	0.644
C10A4.7|C10A4.7|C10A4.7	7.83	8.89	1.1352	0.586	0.852
C10A4.9|C10A4.9|C10A4.9	0.913	0.815	0.8925	1	1
C10B5.1|C10B5.1|C10B5.1	132	87	0.6578	1.98e-08	1.18e-07
C10B5.3|C10B5.3|C10B5.3	223	252	1.1278	0.869	1
C10B5.4|C10B5.4	0	0	NaN	NA	NA
C10C5.10|C10C5.10	0.131	0.294	2.2502	1	1
C10C5.11|C10C5.11	0	0	NaN	NA	NA
C10C5.1|C10C5.1|C10C5.1a	1250	1430	1.1389	3.68e-07	1.91e-06
C10C5.1|C10C5.1|C10C5.1b	1240	1410	1.1364	4.31e-07	2.22e-06
C10C5.1|C10C5.1|C10C5.1c	1280	1460	1.1458	1.33e-08	8.08e-08
C10C5.2|C10C5.2|C10C5.2	26.5	44.5	1.6767	0.0237	0.0598
C10C5.3|C10C5.3|C10C5.3	562	446	0.7939	0.000101	0.000391
C10C5.4|C10C5.4|C10C5.4	450	364	0.8097	0.122	0.249
C10C5.5|C10C5.5|C10C5.5	564	452	0.801	5.19e-09	3.28e-08
C10C5.7|C10C5.7|C10C5.7	14.6	8.8	0.6042	5.5e-05	0.000221
C10C5.9|C10C5.9	0.142	0	0	0.956	1
C10C6.11|C10C6.11	5.8	9.97	1.719	0.0629	0.141
C10C6.12|C10C6.12	0	0	NaN	NA	NA
C10C6.3|C10C6.3|C10C6.3	2.89	0.563	0.1952	0.639	0.904
C10C6.6|C10C6.6|C10C6.6	10500	10700	1.0138	1.17e-08	7.17e-08
C10C6.7|C10C6.7|C10C6.7a	62.2	54	0.8671	0.0854	0.184
C10C6.7|C10C6.7|C10C6.7b	96.9	78.7	0.8125	0.00156	0.00508
C10C6.8|C10C6.8	4.48	7.4	1.653	0.14	0.279
C10C6.9|C10C6.9	156	144	0.9216	0.87	1
C10E2.1|C10E2.1|C10E2.1	5.12	5.72	1.1168	1	1
C10E2.2|C10E2.2|C10E2.2	175	160	0.9153	0.852	1
C10E2.4|C10E2.4|C10E2.4	24.4	14.8	0.6055	0.00199	0.00633
C10E2.5|C10E2.5|C10E2.5	17.4	17.5	1.0025	0.945	1
C10E2.6|C10E2.6|C10E2.6	5430	5810	1.0707	0.0327	0.0796
C10E2.7|C10E2.7	0.131	0.638	4.8825	0.676	0.931
C10E2.8|C10E2.8	0	0	NaN	NA	NA
C10F3.10|C10F3.10	0	0.147	Inf	1	1
C10F3.11|C10F3.11	0	0.147	Inf	1	1
C10F3.12|C10F3.12	0	0	NaN	NA	NA
C10F3.13|C10F3.13	0	0.147	Inf	1	1
C10F3.14|C10F3.14	0.314	0.147	0.4678	0.954	1
C10F3.15|C10F3.15	0.131	0.435	3.3278	0.941	1
C10F3.16|C10F3.16	0.424	1.2	2.8253	0.342	0.575
C10F3.17|C10F3.17	0.131	0.147	1.1251	1	1
C10F3.4|C10F3.4|C10F3.4a	1320	1240	0.9396	0.0219	0.0556
C10F3.4|C10F3.4|C10F3.4b	717	677	0.9437	0.0782	0.17
C10F3.7|C10F3.7|C10F3.7	739	814	1.1017	0.00646	0.0186
C10F3.9|C10F3.9	0	0.147	Inf	1	1
C10G11.10|C10G11.10|C10G11.10	7.72	3.71	0.4806	0.373	0.614
C10G11.12|C10G11.12	0.273	0.113	0.4151	0.955	1
C10G11.13|C10G11.13	0	0	NaN	NA	NA
C10G11.14|C10G11.14	8.73	4.83	0.5535	0.178	0.34
C10G11.15|C10G11.15	1.84	4.42	2.4093	0.0314	0.0768
C10G11.16|C10G11.16	0	0	NaN	NA	NA
C10G11.17|C10G11.17	1.73	0.971	0.5622	0.259	0.462
C10G11.1|C10G11.1|C10G11.1	9.8	2.6	0.2655	0.129	0.261
C10G11.6|C10G11.6|C10G11.6	677	626	0.9249	0.921	1
C10G11.7|C10G11.7|C10G11.7	29000	27900	0.9611	5.55e-69	3.74e-67
C10G11.8|C10G11.8|C10G11.8	2.34	1.99	0.8514	0.794	1
C10G11.9|C10G11.9|C10G11.9	11.8	6.33	0.5379	0.0904	0.193
C10G6.51|C10G6.51	0.273	0.26	0.9544	1	1
C10G6.52|C10G6.52	0.273	0.26	0.9544	1	1
C10G6.53|C10G6.53	0	0	NaN	NA	NA
C10G8.2|C10G8.2|C10G8.2	2.99	4.2	1.4015	0.77	1
C10G8.3|C10G8.3|C10G8.3	4.94	7.07	1.432	0.225	0.413
C10G8.4|C10G8.4|C10G8.4	2.46	14	5.679	4.03e-13	3.57e-12
C10G8.8|C10G8.8|C10G8.8a	986	1230	1.2508	1.42e-34	3.82e-33
C10G8.8|C10G8.8|C10G8.8b	1700	2130	1.252	2.95e-56	1.51e-54
C10G8.9|C10G8.9	0.392	0.672	1.7139	0.918	1
C10G8.t1|C10G8.t1	0.392	0.672	1.7139	0.918	1
C10H11.11|C10H11.11	2.29	5.15	2.2473	0.0844	0.182
C10H11.12|C10H11.12	9.54	8.55	0.8962	0.898	1
C10H11.13|C10H11.13	0.367	0.407	1.1087	1	1
C10H11.14|C10H11.14	1.42	1.86	1.3034	0.855	1
C10H11.7|C10H11.7|C10H11.7	6.94	4.51	0.6498	0.255	0.456
C10H11.8|C10H11.8|C10H11.8	649	584	0.8993	0.000745	0.00254
C11D2.100|C11D2.100	0.131	0	0	0.956	1
C11D2.101|C11D2.101	0	0.147	Inf	1	1
C11D2.1|C11D2.1|C11D2.1	0	0.147	Inf	1	1
C11D2.2|C11D2.2|C11D2.2	30.6	21.8	0.7103	0.0227	0.0575
C11D2.3|C11D2.3|C11D2.3	20.6	20.1	0.9735	1	1
C11D2.4|C11D2.4|C11D2.4	1610	1450	0.9051	2.14e-08	1.27e-07
C11D2.7|C11D2.7|C11D2.7	1680	1420	0.845	1.28e-20	1.85e-19
C11D2.98|C11D2.98	0	0.147	Inf	1	1
C11D2.99|C11D2.99	0	0	NaN	NA	NA
C11E4.10|C11E4.10	0	0	NaN	NA	NA
C11E4.11|C11E4.11	0	0.292	Inf	1	1
C11E4.12|C11E4.12	0.564	2.04	3.6108	0.0504	0.116
C11E4.13|C11E4.13	0.293	0.299	1.0181	1	1
C11E4.14|C11E4.14	0.151	0.113	0.748	1	1
C11E4.15|C11E4.15	0	0	NaN	NA	NA
C11E4.16|C11E4.16	0.293	0.299	1.0181	1	1
C11E4.17|C11E4.17	1.66	0.292	0.1758	0.177	0.339
C11E4.1|C11E4.1|C11E4.1	417	424	1.0179	0.0345	0.0835
C11E4.2|C11E4.2|C11E4.2	112	104	0.9333	0.0167	0.0438
C11E4.6|C11E4.6|C11E4.6	2830	3540	1.2521	2.95e-87	2.63e-85
C11E4.7|C11E4.7|C11E4.7	4.91	4.13	0.8411	0.786	1
C11E4.8|C11E4.8|C11E4.8	11.2	12.7	1.1385	0.935	1
C11E4.9|C11E4.9	0.433	0.988	2.2786	0.688	0.94
C11E4.t1|C11E4.t1	0.282	0.795	2.8185	0.871	1
C11G10.10|C11G10.10	0	0	NaN	NA	NA
C11G10.11|C11G10.11	0.151	0.152	1.0015	1	1
C11G10.12|C11G10.12	0	0	NaN	NA	NA
C11G10.13|C11G10.13	0	0.405	Inf	0.934	1
C11G10.1|C11G10.1|C11G10.1	34.2	25.8	0.7542	0.0704	0.155
C11G10.2|C11G10.2|C11G10.2	18.9	27.1	1.4354	0.000583	0.00202
C11G10.3|C11G10.3	0	0.405	Inf	0.934	1
C11G10.4|C11G10.4	0	0	NaN	NA	NA
C11G10.5|C11G10.5	0	0	NaN	NA	NA
C11G10.6|C11G10.6	0	0	NaN	NA	NA
C11G10.7|C11G10.7	0	0	NaN	NA	NA
C11G10.8|C11G10.8	0	0	NaN	NA	NA
C11G10.9|C11G10.9	0.445	0.147	0.3308	0.836	1
C11G10.t1|C11G10.t1	0.424	0.6	1.4147	0.924	1
C11G6.2|C11G6.2|C11G6.2	102	83.5	0.8178	0.362	0.601
C11G6.3|C11G6.3|C11G6.3	1140	1170	1.0284	0.0205	0.0527
C11G6.5|C11G6.5	0.261	0	0	0.909	1
C11G6.6|C11G6.6	0	0	NaN	NA	NA
C11H1.10|C11H1.10	0.151	0.226	1.496	1	1
C11H1.11|C11H1.11	0	0	NaN	NA	NA
C11H1.2|C11H1.2|C11H1.2	926	750	0.8099	1.38e-20	2e-19
C11H1.3|C11H1.3|C11H1.3	1670	1660	0.9902	0.423	0.675
C11H1.5|C11H1.5|C11H1.5	22.8	21.1	0.9278	0.423	0.675
C11H1.7|C11H1.7|C11H1.7	360	350	0.972	0.0767	0.167
C11H1.8|C11H1.8|C11H1.8	439	437	0.9944	0.306	0.526
C11H1.9|C11H1.9|C11H1.9a	888	990	1.1148	0.00586	0.017
C11H1.9|C11H1.9|C11H1.9b	807	898	1.1128	0.0037	0.0112
C12C8.2|C12C8.2|C12C8.2a	410	472	1.1489	2.85e-05	0.000119
C12C8.2|C12C8.2|C12C8.2b	198	246	1.2395	6.07e-07	3.08e-06
C12C8.5|C12C8.5	1.52	2.2	1.4486	0.578	0.843
C12C8.6|C12C8.6	0	0	NaN	NA	NA
C12C8.7|C12C8.7	1.52	2.35	1.5484	0.463	0.72
C12C8.t1|C12C8.t1	1.11	1.94	1.7539	0.367	0.605
C12C8.t2|C12C8.t2	1.11	1.94	1.7539	0.367	0.605
C12C8.t3|C12C8.t3	1.11	1.94	1.7539	0.367	0.605
C12C8.t4|C12C8.t4	1.11	1.94	1.7539	0.367	0.605
C12C8.t5|C12C8.t5	1.11	1.94	1.7539	0.367	0.605
C12C8.t6|C12C8.t6	1.11	1.94	1.7539	0.367	0.605
C12D12.10|C12D12.10	0	0.412	Inf	0.873	1
C12D12.1|C12D12.1|C12D12.1a	790	926	1.1733	3.77e-09	2.42e-08
C12D12.1|C12D12.1|C12D12.1b	663	772	1.1656	2.05e-08	1.22e-07
C12D12.1|C12D12.1|C12D12.1c	806	958	1.1896	3.64e-11	2.78e-10
C12D12.3|C12D12.3|C12D12.3	77.9	76.8	0.9861	0.646	0.911
C12D12.4|C12D12.4|C12D12.4	0	0.593	Inf	0.66	0.915
C12D12.7|C12D12.7	2.58	2.41	0.935	0.787	1
C12D12.9|C12D12.9	0	0.147	Inf	1	1
C12D5.10|C12D5.10|C12D5.10	14.9	11.6	0.7774	0.141	0.28
C12D5.3|C12D5.3|C12D5.3	12.7	10.9	0.8598	0.52	0.781
C12D5.4|C12D5.4|C12D5.4	4.28	2.25	0.526	0.0608	0.137
C12D5.5|C12D5.5|C12D5.5	2.15	1.51	0.7018	0.387	0.629
C12D5.9|C12D5.9|C12D5.9	40.7	22.6	0.5565	3.38e-07	1.76e-06
C12D8.13|C12D8.13|C12D8.13	2.26	1.7	0.7546	0.978	1
C12D8.15|C12D8.15|C12D8.15	15.7	12.8	0.8142	0.0738	0.162
C12D8.1|C12D8.1	2720	2790	1.0269	0.264	0.469
C12D8.1|C12D8.1|C12D8.1a	2870	2980	1.0388	0.999	1
C12D8.1|C12D8.1|C12D8.1b	3000	3080	1.026	0.744	0.988
C12D8.1|C12D8.1|C12D8.1c	8400	8680	1.0325	0.341	0.573
C12D8.20|C12D8.20|C12D8.20	0.335	0.634	1.8916	0.762	1
C12D8.21|C12D8.21|C12D8.21a	5.12	7.38	1.441	0.857	1
C12D8.21|C12D8.21|C12D8.21b	0.142	0.879	6.1896	0.521	0.782
C12D8.22|C12D8.22	0	0	NaN	NA	NA
C12D8.23|C12D8.23	0	0	NaN	NA	NA
C12D8.24|C12D8.24	0.184	0	0	0.956	1
C12D8.25|C12D8.25	0	0.113	Inf	1	1
C12D8.2|C12D8.2	0.142	0.356	2.5051	1	1
C12D8.3|C12D8.3	0.367	0	0	0.864	1
C12D8.7|C12D8.7	0.649	0.113	0.1743	0.663	0.917
C12D8.9|C12D8.9|C12D8.9a	0.509	0.152	0.2975	0.812	1
C12D8.9|C12D8.9|C12D8.9b	0.509	0.152	0.2975	0.812	1
C13A10.1|C13A10.1|C13A10.1	24.8	20.8	0.8371	0.278	0.489
C13A10.2|C13A10.2|C13A10.2	125	112	0.892	0.112	0.231
C13A10.4|C13A10.4	1.24	1.09	0.8783	0.654	0.915
C13A10.5|C13A10.5	0.426	0	0	0.774	1
C13A2.10|C13A2.10|C13A2.10	10.1	11.1	1.0938	0.452	0.706
C13A2.11|C13A2.11|C13A2.11	0.608	0.992	1.6323	0.889	1
C13A2.12|C13A2.12|C13A2.12	2.9	6.47	2.2347	0.00956	0.0265
C13A2.1|C13A2.1|C13A2.1	1.18	3.19	2.6941	0.171	0.33
C13A2.2|C13A2.2|C13A2.2	0	0	NaN	NA	NA
C13A2.3|C13A2.3|C13A2.3	22.8	23.2	1.0143	0.0644	0.144
C13A2.4|C13A2.4|C13A2.4	0	0.303	Inf	0.981	1
C13A2.5|C13A2.5|C13A2.5	5.52	5.44	0.9858	0.193	0.365
C13A2.6|C13A2.6|C13A2.6	0.151	0.553	3.6508	0.898	1
C13A2.7|C13A2.7|C13A2.7	0.184	0.378	2.0575	0.942	1
C13A2.7|C13A2.7|C13A2.7b	0.509	0.768	1.5067	0.888	1
C13A2.8|C13A2.8	0	0.26	Inf	0.997	1
C13A2.9|C13A2.9|C13A2.9	0.142	0.147	1.0359	1	1
C13B4.1|C13B4.1|C13B4.1a	821	825	1.0044	0.897	1
C13B4.1|C13B4.1|C13B4.1b	1600	1620	1.0117	0.579	0.844
C13B4.5|C13B4.5	0.523	0.785	1.5019	0.919	1
C13B4.6|C13B4.6	0	0	NaN	NA	NA
C13B4.t1|C13B4.t1	0.392	0.672	1.7139	0.918	1
C13B7.6|C13B7.6|C13B7.6	430	476	1.1069	1.85e-12	1.55e-11
C13B9.2|C13B9.2|C13B9.2	331	213	0.644	5.93e-18	7.42e-17
C13B9.3|C13B9.3|C13B9.3	2480	2700	1.0859	0.0531	0.122
C13B9.5|C13B9.5	0.131	0	0	0.956	1
C13C12.2|C13C12.2|C13C12.2	639	746	1.1671	2.03e-07	1.08e-06
C13C12.4|C13C12.4	0	0	NaN	NA	NA
C13C12.5|C13C12.5	0	0	NaN	NA	NA
C13C12.6|C13C12.6	6.28	10.1	1.6026	0.0768	0.167
C13C4.10|C13C4.10	0	0	NaN	NA	NA
C13C4.11|C13C4.11	1.64	1.29	0.7872	0.537	0.798
C13C4.12|C13C4.12	0.727	1.17	1.6081	0.707	0.957
C13C4.4|C13C4.4|C13C4.4	344	265	0.7692	6.4e-15	6.55e-14
C13C4.5|C13C4.5|C13C4.5	1260	1510	1.1933	1.08e-17	1.33e-16
C13C4.6|C13C4.6|C13C4.6	77.9	54.3	0.6981	0.0043	0.0128
C13C4.7|C13C4.7|C13C4.7	75	71.3	0.9513	0.0957	0.202
C13C4.8|C13C4.8|C13C4.8	4.55	3.45	0.7596	0.351	0.586
C13C4.9|C13C4.9	0.413	0.412	0.9977	1	1
C13D9.13|C13D9.13	0.131	0	0	0.956	1
C13E3.1|C13E3.1|C13E3.1	650	680	1.0462	0.000262	0.000957
C13F10.1|C13F10.1|C13F10.1a	214	264	1.2336	1.31e-09	8.73e-09
C13F10.1|C13F10.1|C13F10.1b	131	169	1.2945	1.09e-07	6e-07
C13F10.2|C13F10.2|C13F10.2	406	344	0.8479	7.82e-08	4.37e-07
C13F10.4|C13F10.4|C13F10.4	5380	5260	0.9781	0.626	0.891
C13F10.5|C13F10.5|C13F10.5	583	530	0.9084	0.237	0.43
C13F10.6|C13F10.6|C13F10.6	1370	1190	0.8721	0.00347	0.0105
C13F10.7|C13F10.7|C13F10.7	2370	2110	0.8901	1.37e-08	8.31e-08
C13G3.10|C13G3.10	0	0	NaN	NA	NA
C13G3.11|C13G3.11	0	0	NaN	NA	NA
C13G3.1|C13G3.1|C13G3.1	132	157	1.1961	0.378	0.619
C13G3.4|C13G3.4	0	0.417	Inf	0.928	1
C13G3.5|C13G3.5	0	0	NaN	NA	NA
C13G3.6|C13G3.6	0	0	NaN	NA	NA
C13G3.7|C13G3.7	0	0	NaN	NA	NA
C13G3.8|C13G3.8	0.284	0.405	1.4278	1	1
C13G3.9|C13G3.9	0	0	NaN	NA	NA
C13G5.2|C13G5.2|C13G5.2	713	625	0.876	0.0193	0.0499
C13G5.3|C13G5.3	0	0	NaN	NA	NA
C14A11.10|C14A11.10	0.697	1.52	2.1771	0.537	0.798
C14A11.11|C14A11.11	20.5	26.7	1.3028	0.0278	0.0689
C14A11.2|C14A11.2|C14A11.2	451	465	1.0313	0.0658	0.146
C14A11.5|C14A11.5|C14A11.5	195	181	0.9293	0.154	0.302
C14A11.6|C14A11.6|C14A11.6	83.3	77.4	0.9288	0.625	0.89
C14A11.9|C14A11.9|C14A11.9	530	543	1.0244	0.87	1
C14A4.11|C14A4.11|C14A4.11	3200	3110	0.9726	0.048	0.112
C14A4.12|C14A4.12|C14A4.12a	386	459	1.1906	9.61e-08	5.33e-07
C14A4.12|C14A4.12|C14A4.12b	355	429	1.2096	4.77e-08	2.73e-07
C14A4.13|C14A4.13|C14A4.13	19	22.6	1.1872	0.165	0.32
C14A4.14|C14A4.14|C14A4.14	1770	1740	0.9866	8.03e-05	0.000316
C14A4.3|C14A4.3|C14A4.3	1410	1380	0.9838	0.0466	0.109
C14A4.6|C14A4.6|C14A4.6	629	541	0.8607	6.02e-19	7.99e-18
C14A4.7|C14A4.7|C14A4.7a	190	181	0.9529	0.00275	0.00852
C14A4.7|C14A4.7|C14A4.7b	87.9	88.8	1.0103	0.311	0.534
C14A4.8|C14A4.8|C14A4.8	6.15	6.77	1.1008	0.151	0.297
C14A4.9|C14A4.9|C14A4.9	1310	1420	1.0785	0.0828	0.179
C14A6.10|C14A6.10	9.95	12.4	1.2453	0.976	1
C14A6.12|C14A6.12|C14A6.12	0	0	NaN	NA	NA
C14A6.13|C14A6.13|C14A6.13	0.735	0.441	0.6004	0.924	1
C14A6.14|C14A6.14	0.435	0.147	0.3379	0.84	1
C14A6.15|C14A6.15	9.45	6.99	0.7393	0.584	0.85
C14A6.2|C14A6.2|C14A6.2	5.25	5.5	1.0478	0.447	0.7
C14A6.3|C14A6.3|C14A6.3	1.35	2.61	1.9334	0.284	0.497
C14A6.5|C14A6.5|C14A6.5	0	0	NaN	NA	NA
C14A6.6|C14A6.6|C14A6.6	1.04	1.83	1.7585	0.481	0.74
C14A6.7|C14A6.7|C14A6.7	0.303	0.356	1.1751	1	1
C14A6.8|C14A6.8|C14A6.8	3.69	1.71	0.4628	0.0801	0.174
C14A6.9|C14A6.9	0.629	2.05	3.2593	0.246	0.442
[truncated: 32,874 more rows]

## Sheet: L4 stage N2_vs_ADAR
Gene ID	Normalized mean counts wildtype	Normalized mean counts ADAR mutants	foldChange ADAR mutant/wildtype	pval	padj
2L52.1|2L52.1|2L52.1	137	206	1.50353	9.46e-23	3.86e-22
2L52.2|2L52.2	129	158	1.22051	0.000451	0.000885
2RSSE.1|2RSSE.1|2RSSE.1	574	527	0.91901	0.746	0.914
2RSSE.2|2RSSE.2|2RSSE.2	157	160	1.02126	0.329	0.457
2RSSE.3|2RSSE.3	120	121	1.00369	0.429	0.577
2RSSE.4|2RSSE.4	0	0	NaN	NA	NA
2RSSE.5|2RSSE.5	149	184	1.22965	0.000159	0.000324
2RSSE.6|2RSSE.6	3.59	2.8	0.779	0.981	1
2RSSE.7|2RSSE.7	149	184	1.22965	0.000159	0.000324
2RSSE.8|2RSSE.8	0	0	NaN	NA	NA
3R5.2|3R5.2	152	190	1.25251	8.96e-08	2.2e-07
4R79.2|4R79.2|4R79.2a	93.6	80.9	0.86503	0.000996	0.0019
4R79.2|4R79.2|4R79.2b	90.7	77	0.84934	0.000313	0.000623
6R55.2|6R55.2|6R55.2	11.2	53.5	4.78437	2.75e-06	6.25e-06
AC3.11|AC3.11	0	0	NaN	NA	NA
AC3.12|AC3.12	23.2	15.4	0.66429	0.00851	0.0149
AC3.13|AC3.13	27.4	30.3	1.10823	0.46	0.613
AC3.14|AC3.14	2.83	3.83	1.35257	1	1
AC3.15|AC3.15	0.464	0.425	0.91701	0.834	0.948
AC3.16|AC3.16	54	36.4	0.67385	0.86	0.965
AC3.5|AC3.5|AC3.5	6430	7140	1.11022	9.29e-78	1.01e-76
AC3.9|AC3.9	344	324	0.93974	4.54e-12	1.34e-11
AC7.3|AC7.3|AC7.3	146	75.4	0.51758	1.11e-21	4.41e-21
AC8.10|AC8.10|AC8.10	167	289	1.73723	6.66e-56	5.22e-55
AC8.11|AC8.11|AC8.11	94.9	163	1.71377	5.82e-25	2.52e-24
AC8.12|AC8.12|AC8.12	71.3	165	2.32062	9.53e-14	2.98e-13
AC8.2|AC8.2	48.5	52.4	1.0808	0.0083	0.0146
AC8.3|AC8.3|AC8.3	167	289	1.73723	6.66e-56	5.22e-55
AC8.4|AC8.4|AC8.4	94.9	163	1.71377	5.82e-25	2.52e-24
AC8.5|AC8.5	52.6	68.6	1.30472	3.23e-08	8.1e-08
AC8.6|AC8.6	120	112	0.93695	0.564	0.731
AC8.7|AC8.7|AC8.7	71.3	165	2.32062	9.53e-14	2.98e-13
AC8.9|AC8.9	86.2	95.4	1.10634	0.000583	0.00113
AH10.2|AH10.2|AH10.2	0.661	0.284	0.4288	1	1
AH10.3|AH10.3|AH10.3	25.8	36.3	1.40533	0.000122	0.000251
AH10.4|AH10.4|AH10.4	20.8	94.8	4.55643	9.8e-07	2.28e-06
AH10.7|AH10.7	0	0	NaN	NA	NA
AH10.8|AH10.8	0	0.778	Inf	0.614	0.783
AH10.9|AH10.9	0	0	NaN	NA	NA
AH6.3|AH6.3|AH6.3	150	98.8	0.65658	4.78e-10	1.3e-09
AH9.1|AH9.1|AH9.1	92.3	74.4	0.80526	5.67e-12	1.67e-11
AH9.3|AH9.3|AH9.3	213	182	0.85604	0.0511	0.0818
AH9.4|AH9.4|AH9.4	30.6	49.2	1.60905	0.581	0.748
AH9.6|AH9.6|AH9.6	171	172	1.00295	1.18e-06	2.74e-06
AH9.7|AH9.7|AH9.7	39.2	34.7	0.88659	0.000169	0.000343
B0001.10|B0001.10	0.12	0.652	5.41216	0.961	1
B0001.11|B0001.11	0.86	1.67	1.94098	0.469	0.624
B0001.12|B0001.12	0.531	0.284	0.53454	0.924	1
B0001.2|B0001.2|B0001.2	762	963	1.26387	2.94e-46	1.96e-45
B0001.3|B0001.3|B0001.3a	662	877	1.32488	5.69e-46	3.77e-45
B0001.3|B0001.3|B0001.3b	633	821	1.29757	1.55e-44	1e-43
B0001.4|B0001.4|B0001.4	860	687	0.79888	1.57e-19	5.86e-19
B0001.5|B0001.5|B0001.5	485	585	1.20714	5.28e-32	2.69e-31
B0001.6|B0001.6|B0001.6	2250	2710	1.20405	4.08e-103	6.19e-102
B0001.7|B0001.7|B0001.7	450	484	1.07515	4.02e-18	1.45e-17
B0001.8|B0001.8|B0001.8	1210	1360	1.1239	4.95e-27	2.26e-26
B0019.2|B0019.2|B0019.2	732	1100	1.50367	3.25e-81	3.69e-80
B0024.10|B0024.10|B0024.10	1190	1290	1.08753	4.83e-17	1.68e-16
B0024.11|B0024.11|B0024.11	1100	1150	1.04885	2.62e-05	5.62e-05
B0024.13|B0024.13|B0024.13a	616	343	0.55681	2.13e-95	2.94e-94
B0024.13|B0024.13|B0024.13b	572	319	0.55647	8.21e-90	1.04e-88
B0024.15|B0024.15|B0024.15	313	534	1.70693	1.59e-09	4.23e-09
B0024.17|B0024.17	0	0.353	Inf	0.826	0.945
B0024.18|B0024.18	0	0	NaN	NA	NA
B0024.3|B0024.3|B0024.3	137	252	1.83413	0.681	0.853
B0024.4|B0024.4|B0024.4	594	742	1.25019	3.81e-06	8.6e-06
B0025.4|B0025.4|B0025.4	581	418	0.72065	6.24e-60	5.21e-59
B0025.5|B0025.5|B0025.5	112	82.4	0.73311	4.31e-09	1.12e-08
B0025.6|B0025.6	0.265	0	0	1	1
B0034.10|B0034.10	0	0	NaN	NA	NA
B0034.11|B0034.11	0	0	NaN	NA	NA
B0034.12|B0034.12	0	0	NaN	NA	NA
B0034.13|B0034.13	3.59	4.69	1.30836	0.669	0.841
B0034.14|B0034.14	0	0	NaN	NA	NA
B0034.15|B0034.15	0.12	0	0	1	1
B0034.16|B0034.16	0.531	0.847	1.59696	0.818	0.945
B0034.17|B0034.17	0.262	0	0	1	1
B0034.1|B0034.1|B0034.1	249	157	0.6289	0.000152	0.000309
B0034.2|B0034.2|B0034.2	0.241	0	0	1	1
B0034.4|B0034.4|B0034.4	47.2	34.9	0.73942	0.0281	0.0465
B0034.5|B0034.5|B0034.5	84	87.4	1.03994	0.00764	0.0135
B0034.7|B0034.7|B0034.7	94	434	4.61154	4.08e-28	1.91e-27
B0034.8|B0034.8	0.531	0	0	1	1
B0034.9|B0034.9	0	0	NaN	NA	NA
B0035.11|B0035.11|B0035.11	1650	1770	1.07317	2.51e-05	5.39e-05
B0035.12|B0035.12|B0035.12	3550	4100	1.15533	1.48e-129	3.05e-128
B0035.13|B0035.13|B0035.13	1770	4460	2.52319	NaN	NaN
B0035.15|B0035.15|B0035.15	947	693	0.73158	3.91e-84	4.63e-83
B0035.16|B0035.16|B0035.16	526	430	0.81648	9.73e-49	6.84e-48
B0035.18|B0035.18|B0035.18	150	158	1.05789	1.68e-15	5.57e-15
B0035.19|B0035.19	0.372	0.447	1.20324	0.897	0.993
B0035.1|B0035.1|B0035.1a	1060	930	0.87455	1.39e-18	5.08e-18
B0035.1|B0035.1|B0035.1b	1340	1180	0.88043	1.12e-24	4.83e-24
B0035.3|B0035.3|B0035.3	807	1260	1.56814	5.63e-07	1.33e-06
B0035.6|B0035.6|B0035.6	695	649	0.93452	0.00816	0.0143
B0041.10|B0041.10	0	0	NaN	NA	NA
B0041.1|B0041.1|B0041.1	81	42.6	0.52602	2.06e-16	7.03e-16
B0041.3|B0041.3|B0041.3	187	136	0.72797	3.09e-24	1.31e-23
B0041.5|B0041.5|B0041.5	782	668	0.8552	1.23e-09	3.27e-09
B0041.8|B0041.8|B0041.8	1250	904	0.72165	1.42e-131	2.99e-130
B0041.9|B0041.9	0	0	NaN	NA	NA
B0198.10|B0198.10	0	0	NaN	NA	NA
B0198.2|B0198.2|B0198.2a	54.2	67.8	1.25085	0.0193	0.0326
B0198.2|B0198.2|B0198.2b	38	46.8	1.23246	0.0556	0.0885
B0198.3|B0198.3	30.9	33.4	1.07822	0.0127	0.0218
B0198.3|B0198.3|B0198.3a	290	350	1.20435	1.29e-24	5.53e-24
B0198.4|B0198.4	0	0	NaN	NA	NA
B0198.5|B0198.5	0	0	NaN	NA	NA
B0198.6|B0198.6	0	0	NaN	NA	NA
B0198.7|B0198.7	0	0	NaN	NA	NA
B0198.8|B0198.8	0	0	NaN	NA	NA
B0198.9|B0198.9	0	0	NaN	NA	NA
B0205.10|B0205.10|B0205.10	1000	1060	1.05604	2.65e-34	1.41e-33
B0205.11|B0205.11|B0205.11	1570	1260	0.8009	3.59e-134	7.75e-133
B0205.12|B0205.12|B0205.12	158	630	3.99857	8.56e-35	4.62e-34
B0205.13|B0205.13|B0205.13	198	821	4.1467	4.69e-91	6.09e-90
B0205.14|B0205.14|B0205.14	14.7	155	10.5266	1.32e-44	8.56e-44
B0205.15|B0205.15	0	1.3	Inf	0.578	0.744
B0205.16|B0205.16	0	0	NaN	NA	NA
B0205.1|B0205.1|B0205.1a	532	565	1.06302	8.52e-13	2.58e-12
B0205.1|B0205.1|B0205.1b	1210	1380	1.13254	2.69e-27	1.24e-26
B0205.4|B0205.4|B0205.4	497	433	0.87026	1.15e-66	1.06e-65
B0205.5|B0205.5|B0205.5	10.9	37.5	3.43668	0.0273	0.0453
B0205.6|B0205.6|B0205.6	1210	1230	1.01522	0.0888	0.138
B0205.8|B0205.8|B0205.8	356	397	1.11627	0.0172	0.0292
B0205.9|B0205.9|B0205.9	358	430	1.20025	8.46e-18	3.01e-17
B0207.10|B0207.10|B0207.10	33.6	160	4.75681	1.29e-14	4.14e-14
B0207.11|B0207.11|B0207.11	84.3	49.6	0.58855	1.36e-10	3.8e-10
B0207.13|B0207.13	9.91	8.12	0.81949	0.42	0.566
B0207.14|B0207.14	0	0.353	Inf	0.826	0.945
B0207.15|B0207.15	0.12	0	0	1	1
B0207.16|B0207.16	0	0	NaN	NA	NA
B0207.1|B0207.1|B0207.1	105	120	1.14557	1.04e-05	2.29e-05
B0207.2|B0207.2|B0207.2	149	289	1.93704	0.129	0.195
B0207.5|B0207.5|B0207.5	9.63	16.9	1.755	0.000603	0.00117
B0207.6|B0207.6|B0207.6	507	338	0.66672	2.13e-56	1.69e-55
B0207.7|B0207.7|B0207.7	173	197	1.13928	5.18e-10	1.4e-09
B0207.8|B0207.8|B0207.8	0.396	0.164	0.41333	1	1
B0207.9|B0207.9|B0207.9	79.2	48.5	0.61289	3.18e-09	8.34e-09
B0212.3|B0212.3|B0212.3	115	174	1.51284	1.37e-13	4.28e-13
B0212.4|B0212.4|B0212.4a	260	304	1.1706	0.402	0.544
B0212.4|B0212.4|B0212.4b	251	291	1.15946	0.298	0.419
B0212.4|B0212.4|B0212.4c	277	328	1.18102	0.306	0.429
B0212.6|B0212.6|B0212.6	26.9	40.7	1.51287	8.3e-08	2.04e-07
B0212.7|B0212.7	0.199	0	0	1	1
B0212.8|B0212.8	0	0	NaN	NA	NA
B0212.9|B0212.9	0	0	NaN	NA	NA
B0212.t1|B0212.t1	0	0	NaN	NA	NA
B0213.18|B0213.18	11.3	7.15	0.63472	0.503	0.662
B0213.21|B0213.21	0.58	0.284	0.48863	1	1
B0213.22|B0213.22	1.23	0.939	0.76415	1	1
B0213.23|B0213.23	0.912	1.03	1.13218	0.936	1
B0213.24|B0213.24	13.4	9.64	0.7201	0.13	0.195
B0213.25|B0213.25	0	0	NaN	NA	NA
B0218.5|B0218.5|B0218.5	109	105	0.9565	0.0357	0.0583
B0218.7|B0218.7|B0218.7	222	203	0.91818	0.587	0.754
B0222.10|B0222.10|B0222.10	4.23	4.22	0.99693	0.568	0.735
B0222.11|B0222.11|B0222.11	107	87.8	0.81919	2.93e-12	8.7e-12
B0222.14|B0222.14	0.502	0.164	0.32598	1	1
B0222.1|B0222.1|B0222.1	130	88.2	0.67994	1.14e-05	2.49e-05
B0222.2|B0222.2|B0222.2	2.64	2.8	1.06075	0.248	0.354
B0222.3|B0222.3|B0222.3	122	207	1.69386	9.07e-12	2.64e-11
B0222.5|B0222.5|B0222.5	586	326	0.55554	3.3e-31	1.65e-30
B0222.9|B0222.9|B0222.9	718	894	1.2444	1.22e-44	7.93e-44
B0228.1|B0228.1|B0228.1	622	297	0.47855	1.41e-179	4.88e-178
B0228.6|B0228.6|B0228.6	90	61	0.6783	5.07e-14	1.6e-13
B0228.7|B0228.7|B0228.7	2510	2140	0.85264	2.75e-106	4.33e-105
B0228.8|B0228.8|B0228.8	2.87	2.67	0.93007	0.344	0.475
B0228.9|B0228.9|B0228.9	2.24	3.91	1.74436	0.422	0.568
B0228.t1|B0228.t1	0	0.794	Inf	0.704	0.873
B0238.10|B0238.10|B0238.10	2230	2520	1.12741	0.0204	0.0344
B0238.11|B0238.11|B0238.11	2730	2200	0.80637	3.54e-205	1.5e-203
B0238.12|B0238.12|B0238.12	219	215	0.97816	1.13e-05	2.49e-05
B0238.13|B0238.13|B0238.13	113	106	0.94006	0.883	0.984
B0238.15|B0238.15|B0238.15	0	0	NaN	NA	NA
B0238.18|B0238.18	5.92	2.78	0.46932	0.108	0.165
B0238.1|B0238.1|B0238.1	351	367	1.04534	0.161	0.238
B0238.7|B0238.7|B0238.7	1.41	0.284	0.20105	0.672	0.844
B0238.9|B0238.9|B0238.9	664	655	0.98631	2.72e-11	7.77e-11
B0240.5|B0240.5	0.241	0	0	1	1
B0240.6|B0240.6	0	0	NaN	NA	NA
B0244.10|B0244.10|B0244.10	177	165	0.93254	0.0394	0.0641
B0244.11|B0244.11|B0244.11	0.131	0	0	1	1
B0244.13|B0244.13	0.265	3.41	12.8472	0.0263	0.0438
B0244.14|B0244.14	30.8	50.4	1.63533	8.78e-12	2.56e-11
B0244.4|B0244.4|B0244.4	19.1	17.9	0.93389	0.000567	0.0011
B0244.5|B0244.5|B0244.5	78.6	85.7	1.09031	0.000432	0.00085
B0244.6|B0244.6|B0244.6	133	108	0.81645	2.88e-12	8.58e-12
B0244.7|B0244.7|B0244.7	14.8	20.5	1.38814	0.00211	0.00393
B0244.9|B0244.9|B0244.9	151	85.3	0.56639	1.82e-18	6.61e-18
B0244.t1|B0244.t1	0	1.31	Inf	0.387	0.527
B0244.t2|B0244.t2	0.45	0.142	0.31517	1	1
B0244.t3|B0244.t3	0	0	NaN	NA	NA
B0250.11|B0250.11	8.56	10.4	1.2098	0.0515	0.0824
B0250.12|B0250.12	117	108	0.92296	0.0114	0.0197
B0250.14|B0250.14	0	0	NaN	NA	NA
B0250.15|B0250.15	0.199	0	0	1	1
B0250.16|B0250.16	0	0	NaN	NA	NA
B0250.17|B0250.17	0	0	NaN	NA	NA
B0250.2|B0250.2|B0250.2	169	193	1.14279	2.18e-05	4.71e-05
B0250.3|B0250.3	8610	9420	1.09341	NaN	NaN
B0250.4|B0250.4|B0250.4	79.6	117	1.4695	3.03e-12	9.01e-12
B0250.5|B0250.5|B0250.5	2000	2310	1.15512	2.56e-25	1.12e-24
B0250.7|B0250.7	191	205	1.07742	0.000269	0.000538
B0250.8|B0250.8|B0250.8	4.24	14.3	3.3837	0.0148	0.0254
B0252.1|B0252.1|B0252.1	326	339	1.04163	0.0125	0.0216
B0252.3|B0252.3|B0252.3a	1350	1090	0.80211	8.69e-78	9.44e-77
B0252.3|B0252.3|B0252.3b	732	602	0.82212	4.4e-42	2.74e-41
B0252.3|B0252.3|B0252.3c	677	543	0.80171	6.55e-40	3.91e-39
B0252.5|B0252.5|B0252.5	371	241	0.65051	4.22e-40	2.53e-39
B0252.8|B0252.8|B0252.8	207	354	1.71156	0.222	0.32
B0261.1|B0261.1|B0261.1	852	1000	1.17939	1.57e-59	1.31e-58
B0261.4|B0261.4|B0261.4a	775	676	0.87179	2.18e-07	5.25e-07
B0261.4|B0261.4|B0261.4b	688	584	0.848	5.27e-09	1.37e-08
B0261.5|B0261.5|B0261.5	80.2	40.9	0.50922	1.4e-16	4.81e-16
B0261.6|B0261.6|B0261.6a	164	127	0.77731	0.000965	0.00185
B0261.6|B0261.6|B0261.6b	186	147	0.78844	0.000956	0.00183
B0261.7|B0261.7|B0261.7	707	543	0.76774	1e-15	3.36e-15
B0261.8|B0261.8|B0261.8	623	490	0.78557	1.8e-55	1.41e-54
B0261.9|B0261.9|B0261.9	2.62	4.24	1.61685	0.27	0.382
B0272.3|B0272.3|B0272.3	3170	3210	1.01252	1.51e-28	7.12e-28
B0272.4|B0272.4|B0272.4	778	556	0.71438	3.61e-101	5.35e-100
B0273.111|B0273.111	0.12	0.517	4.28706	0.831	0.945
B0273.112|B0273.112	0.262	0.68	2.59951	0.834	0.948
B0273.113|B0273.113	0	0	NaN	NA	NA
B0273.114|B0273.114	0.199	0.142	0.71392	0.863	0.968
B0273.1|B0273.1|B0273.1	179	141	0.7901	6.48e-09	1.68e-08
B0273.3|B0273.3|B0273.3	536	636	1.18673	2.88e-08	7.22e-08
B0280.11|B0280.11|B0280.11	126	136	1.07706	0.000508	0.000993
B0280.13|B0280.13|B0280.13	646	783	1.21256	3.84e-39	2.26e-38
B0280.17|B0280.17|B0280.17	290	284	0.97932	0.00521	0.00933
B0280.19|B0280.19	0	0.652	Inf	0.827	0.945
B0280.20|B0280.20	0	0.652	Inf	0.827	0.945
B0280.2|B0280.2|B0280.2	116	129	1.11158	0.000227	0.000456
B0280.6|B0280.6	279	431	1.54786	1.09e-23	4.54e-23
B0280.7|B0280.7|B0280.7	360	626	1.73915	1.64e-46	1.1e-45
B0280.9|B0280.9|B0280.9	1080	977	0.90106	3.52e-07	8.39e-07
B0281.1|B0281.1|B0281.1	3.82	3.89	1.01872	0.0983	0.151
B0281.3|B0281.3|B0281.3	445	296	0.6647	2.33e-54	1.79e-53
B0281.4|B0281.4|B0281.4	2.49	2.59	1.04269	0.437	0.586
B0281.5|B0281.5|B0281.5a	1.81	4.38	2.42102	0.0666	0.105
B0281.5|B0281.5|B0281.5b	1.18	3.14	2.66958	0.0535	0.0854
B0281.6|B0281.6|B0281.6	28.4	24.9	0.8769	8.64e-07	2.02e-06
B0281.7|B0281.7	0	0.164	Inf	0.825	0.945
B0281.8|B0281.8|B0281.8	3.99	5.69	1.42622	0.216	0.312
B0284.1|B0284.1|B0284.1	69.7	85.5	1.22577	0.345	0.476
B0284.2|B0284.2|B0284.2	4.81	10.8	2.25658	0.0207	0.0348
B0284.3|B0284.3|B0284.3	89.6	123	1.37658	0.0308	0.0508
B0284.4|B0284.4|B0284.4	3.18	2.57	0.80832	1	1
B0284.5|B0284.5	5.27	5.83	1.107	0.36	0.495
B0284.6|B0284.6	48.4	58.8	1.2155	0.567	0.733
B0284.7|B0284.7	0	0	NaN	NA	NA
B0285.11|B0285.11	46.1	49.1	1.06563	0.0845	0.131
B0285.12|B0285.12	51.1	53.8	1.05251	0.0795	0.124
B0285.14|B0285.14	0	0	NaN	NA	NA
B0285.15|B0285.15	0	0.353	Inf	0.826	0.945
B0285.16|B0285.16	1.76	2.72	1.5451	0.41	0.555
B0285.3|B0285.3|B0285.3	232	342	1.472	1.92e-10	5.3e-10
B0285.4|B0285.4|B0285.4	1340	1340	1.00063	2.07e-82	2.39e-81
B0285.6|B0285.6|B0285.6	217	110	0.50515	1.7e-53	1.29e-52
B0285.t1|B0285.t1	0.261	1.96	7.48544	0.538	0.701
B0286.1|B0286.1|B0286.1	257	294	1.14531	0.0125	0.0216
B0286.3|B0286.3|B0286.3	1010	1080	1.06982	3.26e-07	7.79e-07
B0286.8|B0286.8	0	0	NaN	NA	NA
B0286.9|B0286.9	0	0	NaN	NA	NA
B0294.1|B0294.1|B0294.1	276	154	0.55998	3.62e-35	1.97e-34
B0294.3|B0294.3|B0294.3	2.98	3.81	1.27717	0.544	0.707
B0302.2|B0302.2|B0302.2	0.131	0.495	3.78001	0.831	0.945
B0302.4|B0302.4|B0302.4	0	0	NaN	NA	NA
B0302.5|B0302.5|B0302.5	565	619	1.09424	1.05e-07	2.58e-07
B0302.7|B0302.7	0	0.652	Inf	0.827	0.945
B0303.11|B0303.11|B0303.11	614	791	1.28804	2.12e-83	2.48e-82
B0303.14|B0303.14|B0303.14	138	165	1.18865	2.17e-05	4.68e-05
B0303.15|B0303.15|B0303.15	1100	964	0.8741	1.67e-37	9.49e-37
B0303.16|B0303.16|B0303.16	31	143	4.6111	3.79e-15	1.24e-14
B0303.17|B0303.17	0	0	NaN	NA	NA
B0303.2|B0303.2|B0303.2	691	982	1.42131	6.68e-08	1.65e-07
B0303.3|B0303.3|B0303.3	6770	7490	1.10667	1.45e-10	4.03e-10
B0303.4|B0303.4|B0303.4	1450	1720	1.18115	2.19e-79	2.44e-78
B0303.7|B0303.7|B0303.7a	633	618	0.97695	0.524	0.686
B0303.7|B0303.7|B0303.7b	614	592	0.96392	0.237	0.34
B0304.10|B0304.10	0.241	0.164	0.67953	1	1
B0304.2|B0304.2|B0304.2	333	338	1.01702	2.82e-18	1.02e-17
B0304.4|B0304.4|B0304.4	180	133	0.73895	9.84e-30	4.78e-29
B0310.10|B0310.10	1.19	1	0.84294	0.836	0.949
B0310.11|B0310.11	0	0	NaN	NA	NA
B0310.12|B0310.12	1.19	1	0.84294	0.836	0.949
B0310.1|B0310.1|B0310.1a	351	322	0.91512	0.523	0.684
B0310.1|B0310.1|B0310.1b	444	422	0.95127	0.0413	0.0669
B0310.2|B0310.2|B0310.2	377	349	0.92381	0.0209	0.0352
B0310.3|B0310.3|B0310.3	57.3	84.8	1.48004	7.48e-08	1.85e-07
B0310.6|B0310.6|B0310.6	155	382	2.4697	8.42e-08	2.07e-07
B0310.7|B0310.7	0	0	NaN	NA	NA
B0310.8|B0310.8	0	0	NaN	NA	NA
B0310.9|B0310.9	0	0	NaN	NA	NA
B0331.2|B0331.2|B0331.2	336	481	1.4313	0.128	0.193
B0334.10|B0334.10|B0334.10	16	9.24	0.57789	0.00286	0.00526
B0334.12|B0334.12	0.995	0.652	0.65563	0.802	0.945
B0334.13|B0334.13|B0334.13	184	643	3.50094	9.53e-52	7.06e-51
B0334.15|B0334.15|B0334.15	3950	3270	0.8278	1.27e-60	1.07e-59
B0334.16|B0334.16	0	0	NaN	NA	NA
B0334.17|B0334.17	0.265	0.794	2.99235	0.827	0.945
B0334.18|B0334.18	0.44	1.92	4.35671	0.476	0.631
B0334.19|B0334.19	0.12	0	0	1	1
B0334.3|B0334.3|B0334.3a	5510	4690	0.851	7.25e-51	5.29e-50
B0334.3|B0334.3|B0334.3b	2800	2400	0.85964	2.22e-27	1.02e-26
B0334.4|B0334.4|B0334.4	783	588	0.75054	1.18e-81	1.35e-80
B0334.5|B0334.5|B0334.5	3960	3130	0.79071	3.53e-70	3.42e-69
B0334.6|B0334.6|B0334.6	272	297	1.0934	0.000847	0.00163
B0334.9|B0334.9	0.785	0.491	0.62572	0.998	1
B0336.11|B0336.11|B0336.11a	542	707	1.30392	1e-11	2.92e-11
B0336.11|B0336.11|B0336.11b	78.7	132	1.67129	1.63e-20	6.28e-20
B0336.12|B0336.12|B0336.12	3.44	2.62	0.76234	0.259	0.368
B0336.13|B0336.13|B0336.13	511	523	1.02392	8.92e-23	3.64e-22
B0336.14|B0336.14	0	0	NaN	NA	NA
B0336.15|B0336.15	0	0	NaN	NA	NA
B0336.16|B0336.16	0	0	NaN	NA	NA
B0336.3|B0336.3|B0336.3	1890	2350	1.24242	1.64e-54	1.26e-53
B0336.5|B0336.5|B0336.5a	252	244	0.97115	1	1
B0336.5|B0336.5|B0336.5b	250	243	0.97256	0.902	0.997
B0336.7|B0336.7|B0336.7a	316	335	1.0621	2.46e-06	5.62e-06
B0336.7|B0336.7|B0336.7b	626	668	1.0665	2.14e-11	6.14e-11
B0344.1|B0344.1	77.8	132	1.69071	1.87e-27	8.64e-27
B0344.3|B0344.3	0.382	1	2.63173	0.994	1
B0344.4|B0344.4	0.382	1	2.63173	0.994	1
B0344.5|B0344.5	0.382	1	2.63173	0.994	1
B0344.t1|B0344.t1	0.382	1	2.63173	0.994	1
B0344.t2|B0344.t2	0.382	1	2.63173	0.994	1
B0344.t3|B0344.t3	0.382	1	2.63173	0.994	1
B0348.1|B0348.1|B0348.1	0.199	0.495	2.4898	0.831	0.945
B0348.2|B0348.2|B0348.2	45.6	66	1.44525	0.0762	0.119
B0348.5|B0348.5|B0348.5	67.9	178	2.62732	6.46e-29	3.08e-28
B0350.3|B0350.3|B0350.3	0	0	NaN	NA	NA
B0350.67|B0350.67	0	0.142	Inf	0.825	0.945
B0350.68|B0350.68	0.12	0	0	1	1
B0350.69|B0350.69	0	0	NaN	NA	NA
B0350.70|B0350.70	0.12	0	0	1	1
B0350.71|B0350.71	0.265	0.495	1.86423	0.831	0.945
B0350.72|B0350.72	0	0	NaN	NA	NA
B0350.73|B0350.73	0.715	2.75	3.84479	0.699	0.869
B0350.74|B0350.74	1.71	5.64	3.29747	0.677	0.849
B0350.75|B0350.75	0	0	NaN	NA	NA
B0350.76|B0350.76	0.131	0.142	1.08387	0.85	0.958
B0350.77|B0350.77	0	0.652	Inf	0.827	0.945
B0350.78|B0350.78	0.251	0	0	1	1
B0350.79|B0350.79	0	0.652	Inf	0.827	0.945
B0350.80|B0350.80	0	0	NaN	NA	NA
B0350.81|B0350.81	0	0	NaN	NA	NA
B0350.82|B0350.82	0.12	0	0	1	1
B0350.83|B0350.83	1.07	3.54	3.30363	0.811	0.945
B0350.84|B0350.84	0	0.142	Inf	0.825	0.945
B0350.t1|B0350.t1	0.464	2.75	5.92754	0.327	0.454
B0353.1|B0353.1|B0353.1a	188	230	1.22172	3.59e-10	9.81e-10
B0353.1|B0353.1|B0353.1b	187	228	1.22126	2.91e-10	7.99e-10
B0353.2|B0353.2	0	0	NaN	NA	NA
B0361.11|B0361.11|B0361.11	136	89.9	0.66051	1.01e-12	3.04e-12
B0361.2|B0361.2|B0361.2a	554	719	1.29768	0.0204	0.0343
B0361.2|B0361.2|B0361.2b	170	357	2.09414	0.00844	0.0148
B0361.3|B0361.3|B0361.3	1600	1700	1.06104	3.34e-09	8.76e-09
B0361.4|B0361.4|B0361.4	122	113	0.92877	0.595	0.762
B0361.6|B0361.6|B0361.6	885	559	0.63127	1.48e-86	1.81e-85
B0361.8|B0361.8|B0361.8	1760	1760	1.00059	0.488	0.645
B0361.9|B0361.9|B0361.9	957	615	0.64301	4.85e-114	8.41e-113
B0365.1|B0365.1|B0365.1	1160	1350	1.16251	2.6e-40	1.57e-39
B0365.2|B0365.2	2.37	3.41	1.43755	0.433	0.581
B0365.7|B0365.7|B0365.7	40.1	64.7	1.61439	2.22e-13	6.86e-13
B0365.8|B0365.8	0	0	NaN	NA	NA
B0379.10|B0379.10	0	0	NaN	NA	NA
B0379.11|B0379.11	71.7	118	1.64367	6.92e-26	3.07e-25
B0379.1|B0379.1	715	452	0.63247	7.06e-95	9.65e-94
B0379.1|B0379.1|B0379.1a	949	621	0.6551	2.16e-119	4.01e-118
B0379.2|B0379.2|B0379.2	233	139	0.59881	1.42e-24	6.1e-24
B0379.6|B0379.6|B0379.6	0	0	NaN	NA	NA
B0379.7|B0379.7|B0379.7	469	555	1.18202	6.23e-24	2.61e-23
B0379.8|B0379.8	0	0	NaN	NA	NA
B0379.9|B0379.9	0.261	0	0	1	1
B0391.10|B0391.10|B0391.10	250	316	1.26713	3.18e-14	1.01e-13
B0391.13|B0391.13	0	0	NaN	NA	NA
B0391.1|B0391.1	0	0	NaN	NA	NA
B0391.3|B0391.3|B0391.3	0	0	NaN	NA	NA
B0391.8|B0391.8	60.2	86.6	1.43933	4.49e-16	1.52e-15
B0393.10|B0393.10	0.12	0	0	1	1
B0393.11|B0393.11	2.09	1.81	0.86525	1	1
B0393.12|B0393.12	0.12	0	0	1	1
B0393.13|B0393.13	0	0	NaN	NA	NA
B0393.14|B0393.14	1.61	0	0	0.183	0.268
B0393.15|B0393.15	0	0	NaN	NA	NA
B0393.16|B0393.16	0	0	NaN	NA	NA
B0393.3|B0393.3|B0393.3	482	573	1.18921	1.14e-23	4.75e-23
B0393.4|B0393.4|B0393.4	557	491	0.88198	0.00147	0.00277
B0393.5|B0393.5|B0393.5	587	1070	1.82682	4.13e-117	7.45e-116
B0393.6|B0393.6|B0393.6	251	231	0.92035	0.152	0.226
B0393.7|B0393.7|B0393.7	28.3	23.1	0.81776	0.000877	0.00168
B0393.8|B0393.8|B0393.8	360	825	2.29212	0.00234	0.00434
B0393.9|B0393.9|B0393.9a	265	169	0.6367	1.71e-37	9.71e-37
B0393.9|B0393.9|B0393.9b	294	190	0.64563	7.44e-38	4.28e-37
B0395.10|B0395.10	0	0.989	Inf	0.518	0.679
B0395.3|B0395.3|B0395.3	2540	2540	0.99864	4.34e-08	1.08e-07
B0395.7|B0395.7	0.131	0.8	6.11532	0.683	0.854
B0395.8|B0395.8	0	0	NaN	NA	NA
B0395.9|B0395.9	0	0	NaN	NA	NA
B0395.t1|B0395.t1	0	0.989	Inf	0.518	0.679
B0399.3|B0399.3	0	0	NaN	NA	NA
B0399.t10|B0399.t10	0	0.495	Inf	0.773	0.937
B0399.t11|B0399.t11	0	0	NaN	NA	NA
B0399.t12|B0399.t12	0	0.164	Inf	0.825	0.945
B0399.t13|B0399.t13	0	0	NaN	NA	NA
B0399.t14|B0399.t14	0	0	NaN	NA	NA
B0399.t15|B0399.t15	0	0	NaN	NA	NA
B0399.t16|B0399.t16	0	0	NaN	NA	NA
B0399.t1|B0399.t1	0	0	NaN	NA	NA
B0399.t2|B0399.t2	0	0.164	Inf	0.825	0.945
B0399.t3|B0399.t3	0	0	NaN	NA	NA
B0399.t4|B0399.t4	0	0	NaN	NA	NA
B0399.t5|B0399.t5	0	0	NaN	NA	NA
B0399.t6|B0399.t6	0	0.353	Inf	0.826	0.945
B0399.t7|B0399.t7	0.131	0	0	1	1
B0399.t8|B0399.t8	0.12	0.142	1.17708	0.848	0.958
B0399.t9|B0399.t9	0.265	0	0	1	1
B0403.10|B0403.10	0	0	NaN	NA	NA
B0403.11|B0403.11	0	0	NaN	NA	NA
B0403.12|B0403.12	0.12	0	0	1	1
B0403.13|B0403.13	0.12	0	0	1	1
B0403.14|B0403.14	0	0	NaN	NA	NA
B0403.3|B0403.3|B0403.3	67.9	74.3	1.09454	0.000844	0.00162
B0403.5|B0403.5|B0403.5	503	442	0.87932	2.88e-06	6.55e-06
B0403.6|B0403.6|B0403.6	197	220	1.11511	4.81e-11	1.36e-10
B0403.7|B0403.7	0	0	NaN	NA	NA
B0403.8|B0403.8	0	0	NaN	NA	NA
B0403.9|B0403.9	0.492	0.778	1.58082	0.918	1
B0410.1|B0410.1|B0410.1	0.46	0.658	1.43121	0.829	0.945
B0410.3|B0410.3|B0410.3	730	2100	2.8774	NaN	NaN
B0410.4|B0410.4	0.12	0	0	1	1
B0412.3|B0412.3|B0412.3	2190	2630	1.1973	3.44e-137	7.79e-136
B0412.6|B0412.6	4.56	2.3	0.504	0.0137	0.0236
B0412.7|B0412.7	5.95	4.81	0.80961	0.0478	0.0769
B0414.10|B0414.10	0	0	NaN	NA	NA
B0414.11|B0414.11	0	0	NaN	NA	NA
B0414.12|B0414.12	0	0	NaN	NA	NA
B0416.1|B0416.1|B0416.1	458	678	1.47938	9.44e-76	9.95e-75
B0416.2|B0416.2|B0416.2	1.85	4.08	2.21102	0.899	0.994
B0416.3|B0416.3|B0416.3	54.9	39.7	0.72449	0.00035	0.000692
B0416.4|B0416.4|B0416.4	6.6	5.15	0.77978	0.0741	0.116
B0416.5|B0416.5|B0416.5a	1930	1560	0.80825	1.7e-17	5.99e-17
B0416.5|B0416.5|B0416.5b	1340	1070	0.80251	1.48e-09	3.95e-09
B0416.7|B0416.7|B0416.7a	282	346	1.22604	3.74e-19	1.39e-18
B0416.7|B0416.7|B0416.7b	291	356	1.22225	3.29e-20	1.25e-19
B0416.8|B0416.8	0.12	0.353	2.92801	0.886	0.985
B0416.9|B0416.9	0	0	NaN	NA	NA
B0432.10|B0432.10|B0432.10	478	399	0.83506	4.4e-18	1.58e-17
B0432.11|B0432.11|B0432.11	88.5	43.4	0.49081	9.5e-18	3.38e-17
B0432.13|B0432.13|B0432.13	513	695	1.35597	1.52e-56	1.2e-55
B0432.14|B0432.14|B0432.14	130	92.6	0.71166	6.44e-09	1.67e-08
B0432.16|B0432.16	0.531	0.652	1.2289	1	1
B0432.17|B0432.17	0.382	0.142	0.37143	1	1
B0432.18|B0432.18	0.531	0.652	1.2289	1	1
B0432.19|B0432.19	0.12	0	0	1	1
B0432.1|B0432.1|B0432.1	19.1	12	0.62784	0.000683	0.00132
B0432.6|B0432.6|B0432.6	126	155	1.22824	2.81e-08	7.05e-08
B0432.7|B0432.7|B0432.7	175	236	1.34624	5.82e-19	2.15e-18
B0432.8|B0432.8|B0432.8	133	142	1.06801	0.00233	0.00431
B0432.9|B0432.9|B0432.9	275	749	2.72694	1.58e-50	1.15e-49
B0454.12|B0454.12	0.12	0	0	1	1
B0454.13|B0454.13	0	0	NaN	NA	NA
B0454.14|B0454.14	0.12	0	0	1	1
B0454.15|B0454.15	0	0	NaN	NA	NA
B0454.16|B0454.16	0	0	NaN	NA	NA
B0454.17|B0454.17	0	0	NaN	NA	NA
B0454.18|B0454.18	0.715	0.306	0.42719	1	1
B0454.19|B0454.19	0.12	0	0	1	1
B0454.20|B0454.20	0	0.164	Inf	0.825	0.945
B0454.21|B0454.21	0	0	NaN	NA	NA
B0454.22|B0454.22	0	0	NaN	NA	NA
B0454.23|B0454.23	0	0	NaN	NA	NA
B0454.24|B0454.24	0.12	0	0	1	1
B0454.25|B0454.25	0.12	0	0	1	1
B0454.5|B0454.5|B0454.5	557	471	0.84561	4.37e-75	4.57e-74
B0454.6|B0454.6|B0454.6	417	432	1.03616	3.59e-13	1.1e-12
B0454.8|B0454.8|B0454.8	58.2	87.6	1.5036	1.31e-09	3.5e-09
B0454.9|B0454.9|B0454.9	197	226	1.15167	0.209	0.302
B0457.10|B0457.10	0	0.142	Inf	0.825	0.945
B0457.11|B0457.11	0	0	NaN	NA	NA
B0457.12|B0457.12	0	0	NaN	NA	NA
B0457.13|B0457.13	0	0	NaN	NA	NA
B0457.14|B0457.14	0.265	0	0	1	1
B0457.15|B0457.15	0	0.142	Inf	0.825	0.945
B0457.16|B0457.16	1.43	1.48	1.03803	1	1
B0457.17|B0457.17	0	0	NaN	NA	NA
B0457.18|B0457.18	0.531	1.18	2.22081	0.346	0.478
B0457.19|B0457.19	0.527	1.13	2.14613	0.691	0.862
B0457.2|B0457.2|B0457.2	932	511	0.54809	3.92e-191	1.51e-189
B0457.3|B0457.3	48.6	31.9	0.65496	0.00307	0.00563
B0457.4|B0457.4|B0457.4	33.8	20.6	0.61053	0.000108	0.000223
B0457.6|B0457.6|B0457.6	364	309	0.84859	2.02e-14	6.47e-14
B0457.8|B0457.8	0	0.284	Inf	0.808	0.945
B0457.9|B0457.9	0	0	NaN	NA	NA
B0462.1|B0462.1|B0462.1	7.01	5.28	0.75303	0.708	0.877
B0462.4|B0462.4|B0462.4	55.7	68.5	1.22996	0.00658	0.0117
B0462.5|B0462.5|B0462.5	48.2	20.5	0.42526	1.3e-15	4.33e-15
B0464.2|B0464.2|B0464.2a	1170	1460	1.24691	2e-68	1.9e-67
B0464.2|B0464.2|B0464.2b	320	1360	4.2514	NaN	NaN
B0464.2|B0464.2|B0464.2c	1260	1580	1.25034	1.63e-63	1.44e-62
B0464.2|B0464.2|B0464.2d	294	1250	4.24645	0	0
B0464.6|B0464.6|B0464.6	2740	2740	0.99787	2.18e-25	9.53e-25
B0464.9|B0464.9|B0464.9	372	338	0.90936	1	1
B0478.23|B0478.23	0.199	0	0	1	1
B0478.24|B0478.24	0	0	NaN	NA	NA
B0478.25|B0478.25	0.199	0	0	1	1
B0478.26|B0478.26	0.199	0	0	1	1
B0478.3|B0478.3|B0478.3	103	440	4.25616	2.13e-27	9.82e-27
B0491.10|B0491.10	0	0.353	Inf	0.826	0.945
B0491.11|B0491.11	0	0	NaN	NA	NA
B0491.1|B0491.1|B0491.1	354	373	1.05424	2.28e-07	5.49e-07
B0491.5|B0491.5|B0491.5	11700	12600	1.07797	NaN	NaN
B0491.6|B0491.6|B0491.6a	404	501	1.23979	3.13e-23	1.29e-22
B0491.6|B0491.6|B0491.6b	391	489	1.253	9.29e-20	3.5e-19
B0491.7|B0491.7|B0491.7	1600	1260	0.78705	6.56e-127	1.32e-125
B0491.9|B0491.9	0.131	0	0	1	1
B0491.t1|B0491.t1	0	0	NaN	NA	NA
B0491.t2|B0491.t2	0	0	NaN	NA	NA
B0495.11|B0495.11	0	0	NaN	NA	NA
B0495.12|B0495.12	0	0	NaN	NA	NA
B0495.13|B0495.13	0	0.706	Inf	0.726	0.894
B0495.14|B0495.14	0	0	NaN	NA	NA
B0495.15|B0495.15	1.91	2.49	1.30804	0.558	0.723
B0495.16|B0495.16	0	0	NaN	NA	NA
B0495.17|B0495.17	0	0	NaN	NA	NA
B0495.18|B0495.18	0	0	NaN	NA	NA
B0495.19|B0495.19	0.131	0.164	1.25143	0.853	0.96
B0495.20|B0495.20	0.131	0.495	3.78001	0.831	0.945
B0495.21|B0495.21	0	0.706	Inf	0.726	0.894
B0495.22|B0495.22	0	0	NaN	NA	NA
B0495.2|B0495.2|B0495.2	1110	1380	1.24082	2.86e-43	1.81e-42
B0495.5|B0495.5|B0495.5	1140	1160	1.01905	7.41e-08	1.83e-07
B0495.6|B0495.6|B0495.6	246	324	1.31998	0.0102	0.0177
B0495.7|B0495.7|B0495.7	8940	8560	0.95801	1.72e-10	4.77e-10
B0495.8|B0495.8|B0495.8a	1360	1220	0.89862	1.51e-17	5.32e-17
B0495.8|B0495.8|B0495.8b	738	699	0.94703	8.45e-05	0.000175
B0495.9|B0495.9|B0495.9	882	728	0.82512	1.64e-60	1.38e-59
B0496.11|B0496.11|B0496.11	72.2	208	2.88564	0.00103	0.00195
B0496.12|B0496.12	0	0	NaN	NA	NA
B0496.13|B0496.13	0.12	0.142	1.17708	0.848	0.958
B0496.14|B0496.14	0.372	0.652	1.75378	1	1
B0496.15|B0496.15	0	0	NaN	NA	NA
B0496.16|B0496.16	0	0	NaN	NA	NA
B0496.17|B0496.17	0	0	NaN	NA	NA
B0496.18|B0496.18	0	0	NaN	NA	NA
B0496.19|B0496.19	0.265	0	0	1	1
B0496.1|B0496.1|B0496.1	135	61.6	0.45737	6.91e-32	3.5e-31
B0496.2|B0496.2|B0496.2	103	105	1.0218	1.34e-05	2.93e-05
B0496.6|B0496.6|B0496.6	71.2	65.1	0.91443	3.61e-05	7.67e-05
B0507.10|B0507.10|B0507.10	79.4	69.6	0.87593	0.0118	0.0203
B0507.13|B0507.13	0	0	NaN	NA	NA
B0507.14|B0507.14	0	0	NaN	NA	NA
B0507.1|B0507.1|B0507.1	271	567	2.09474	3.45e-113	5.9e-112
B0507.2|B0507.2|B0507.2	592	613	1.03497	5.37e-07	1.27e-06
B0507.3|B0507.3|B0507.3a	206	175	0.84878	0.107	0.164
B0507.3|B0507.3|B0507.3b	194	162	0.83491	0.13	0.195
B0507.4|B0507.4|B0507.4	0.894	1.59	1.77508	1	1
B0507.5|B0507.5|B0507.5	1.62	0.98	0.60301	0.415	0.561
B0507.6|B0507.6|B0507.6	33.5	26.9	0.80334	0.184	0.269
B0507.7|B0507.7|B0507.7	38.1	41.3	1.08487	7.55e-07	1.77e-06
B0507.8|B0507.8|B0507.8	43.8	38	0.86706	0.0681	0.107
B0507.9|B0507.9|B0507.9	21.8	25.8	1.18374	0.33	0.458
B0511.11|B0511.11|B0511.11	244	312	1.27965	0.000322	0.00064
B0511.12|B0511.12|B0511.12	1060	1400	1.3256	1.61e-121	3.05e-120
B0511.13|B0511.13|B0511.13	593	518	0.87357	1.05e-36	5.86e-36
B0511.14|B0511.14|B0511.14a	257	300	1.16945	2.03e-12	6.05e-12
B0511.14|B0511.14|B0511.14b	193	223	1.15593	1.11e-09	2.97e-09
B0511.15|B0511.15	0	0.142	Inf	0.825	0.945
B0511.16|B0511.16	3.45	6.72	1.95077	0.00968	0.0169
B0511.2|B0511.2|B0511.2	84	79.2	0.94288	0.445	0.595
B0511.6|B0511.6|B0511.6	4470	4850	1.0853	2.17e-13	6.72e-13
B0511.7|B0511.7|B0511.7	700	567	0.80898	2.23e-71	2.21e-70
B0513.11|B0513.11	1.8	0.469	0.26062	0.257	0.365
B0513.12|B0513.12	128	139	1.08613	0.00331	0.00605
B0513.2|B0513.2|B0513.2a	995	903	0.9069	0.0309	0.051
B0513.2|B0513.2|B0513.2b	900	829	0.92145	0.129	0.194
B0513.4|B0513.4|B0513.4a	77.9	121	1.54742	0.248	0.354
B0513.4|B0513.4|B0513.4b	12.8	34.3	2.68392	0.0478	0.0769
B0513.5|B0513.5|B0513.5	2170	2430	1.1194	7.33e-51	5.34e-50
B0513.6|B0513.6|B0513.6	74.5	102	1.36453	9.41e-12	2.74e-11
B0513.7|B0513.7	387	391	1.01011	0.0212	0.0356
B0513.9|B0513.9|B0513.9a	295	501	1.69695	0.00459	0.00827
B0513.9|B0513.9|B0513.9b	668	1120	1.67333	2.41e-05	5.19e-05
B0513.t1|B0513.t1	0.131	0.495	3.78001	0.831	0.945
B0523.6|B0523.6	0.261	0	0	1	1
B0524.2|B0524.2|B0524.2	43.9	45.9	1.04703	0.231	0.332
B0524.3|B0524.3|B0524.3	3.15	3.99	1.26746	0.436	0.585
B0524.4|B0524.4|B0524.4	46	57.1	1.24103	9.49e-05	0.000196
B0524.5|B0524.5|B0524.5	27	31.9	1.18346	0.0245	0.0409
B0524.6|B0524.6|B0524.6	411	373	0.90661	0.0594	0.0943
B0524.7|B0524.7	0	0	NaN	NA	NA
B0524.8|B0524.8	0	0	NaN	NA	NA
B0524.9|B0524.9	0	0	NaN	NA	NA
B0545.4|B0545.4|B0545.4	40.4	29.6	0.73305	0.000381	0.000752
B0546.2|B0546.2|B0546.2	836	1000	1.19859	1.81e-25	7.92e-25
B0546.3|B0546.3|B0546.3	458	475	1.03632	1.31e-11	3.78e-11
B0546.4|B0546.4|B0546.4a	235	272	1.1582	0.0022	0.00409
B0546.4|B0546.4|B0546.4b	224	264	1.18178	0.000656	0.00127
B0546.5|B0546.5|B0546.5	21.5	25.9	1.20568	0.000839	0.00161
B0547.2|B0547.2|B0547.2	0.527	1.3	2.47633	1	1
B0547.34|B0547.34	0	0	NaN	NA	NA
B0554.1|B0554.1|B0554.1	0.894	1.61	1.79959	1	1
B0554.2|B0554.2|B0554.2	0.131	0	0	1	1
B0554.3|B0554.3|B0554.3	0	0	NaN	NA	NA
B0554.4|B0554.4|B0554.4	8.59	16.1	1.87361	0.00111	0.00211
B0554.5|B0554.5|B0554.5	74.2	91.3	1.23163	0.00173	0.00324
B0554.7|B0554.7|B0554.7	47.6	69.5	1.46107	0.0259	0.0432
B0563.10|B0563.10|B0563.10	2.61	7.2	2.75895	0.756	0.924
B0563.12|B0563.12	0	0	NaN	NA	NA
B0563.13|B0563.13	0	0	NaN	NA	NA
B0563.14|B0563.14	0	0.164	Inf	0.825	0.945
B0563.15|B0563.15	0	0.306	Inf	0.805	0.945
B0563.16|B0563.16	0.265	0.353	1.32969	0.93	1
B0563.17|B0563.17	0	0.164	Inf	0.825	0.945
B0563.1|B0563.1|B0563.1	10.8	29.9	2.76702	0.485	0.641
B0563.5|B0563.5|B0563.5	60.9	159	2.61839	0.0641	0.101
B0563.6|B0563.6|B0563.6a	75.3	88.4	1.17476	0.00015	0.000306
B0563.6|B0563.6|B0563.6b	140	165	1.17966	6.84e-07	1.61e-06
B0563.6|B0563.6|B0563.6c	61	78.6	1.28949	2.3e-06	5.25e-06
B0563.7|B0563.7|B0563.7	50.2	60.9	1.21356	0.0612	0.097
B0563.8|B0563.8|B0563.8	0.502	0.142	0.28234	1	1
B0563.9|B0563.9|B0563.9	10	15.5	1.54398	0.995	1
B0564.11|B0564.11|B0564.11	615	644	1.04728	1.28e-18	4.68e-18
B0564.2|B0564.2|B0564.2	293	236	0.80601	3.32e-18	1.2e-17
B0564.3|B0564.3|B0564.3	360	248	0.68826	1.01e-10	2.82e-10
B0564.4|B0564.4|B0564.4	30.9	17.5	0.56613	0.00842	0.0148
B0564.6|B0564.6|B0564.6a	220	199	0.90502	1.64e-07	3.99e-07
B0564.6|B0564.6|B0564.6b	218	197	0.90374	2.79e-07	6.68e-07
B0564.7|B0564.7|B0564.7	1730	1910	1.1037	9.34e-30	4.54e-29
B0564.9|B0564.9|B0564.9	220	199	0.90502	1.64e-07	3.99e-07
BE0003N10.1|BE0003N10.1|BE0003N10.1	846	672	0.79387	7.57e-11	2.13e-10
BE0003N10.3|BE0003N10.3|BE0003N10.3	465	434	0.93333	0.000381	0.000752
BE0003N10.4|BE0003N10.4	0	1.3	Inf	0.578	0.744
BE0003N10.5|BE0003N10.5	0	1.3	Inf	0.578	0.744
BE0003N10.t1|BE0003N10.t1	0	0	NaN	NA	NA
BE0003N10.t2|BE0003N10.t2	0	0	NaN	NA	NA
BE0003N10.t3|BE0003N10.t3	0	0	NaN	NA	NA
BE0003N10.t4|BE0003N10.t4	0	0	NaN	NA	NA
BE0003N10.t5|BE0003N10.t5	0	0	NaN	NA	NA
BE0003N10.t6|BE0003N10.t6	0	0	NaN	NA	NA
BE10.1|BE10.1|BE10.1	176	159	0.90556	0.301	0.422
BE10.3|BE10.3|BE10.3	9.34	14.3	1.53141	0.535	0.698
BE10.4|BE10.4|BE10.4	52.7	40.3	0.76361	0.000284	0.000566
BE10.5|BE10.5|BE10.5	64.4	42.1	0.65325	3.15e-05	6.72e-05
BE10.6|BE10.6	7.3	15.5	2.12584	0.843	0.955
BE10.7|BE10.7	0	0.517	Inf	0.769	0.935
C01A2.10|C01A2.10	4.31	7.29	1.69311	0.00877	0.0153
C01A2.1|C01A2.1|C01A2.1	13.8	27.2	1.97103	6.71e-06	1.5e-05
C01A2.2|C01A2.2|C01A2.2a	545	539	0.98849	1.47e-22	5.97e-22
C01A2.2|C01A2.2|C01A2.2b	172	171	0.98961	8.48e-11	2.38e-10
C01A2.3|C01A2.3|C01A2.3	2740	2240	0.8171	2.85e-60	2.4e-59
C01A2.4|C01A2.4|C01A2.4	964	689	0.71395	7.93e-105	1.22e-103
C01A2.5|C01A2.5|C01A2.5	1170	1320	1.13074	7.15e-37	4.01e-36
C01A2.6|C01A2.6|C01A2.6	3.82	4.6	1.20288	1	1
C01A2.8|C01A2.8	0	0	NaN	NA	NA
C01A2.9|C01A2.9|C01A2.9	2.75	1.63	0.59388	0.0166	0.0283
C01B10.10|C01B10.10|C01B10.10	528	577	1.09197	0.000421	0.000827
C01B10.11|C01B10.11|C01B10.11	915	1540	1.68614	4.83e-79	5.33e-78
C01B10.3|C01B10.3|C01B10.3	1010	1020	1.01497	2.01e-48	1.41e-47
C01B10.44|C01B10.44|C01B10.44	41.7	27.3	0.65655	2.68e-06	6.09e-06
C01B10.45|C01B10.45	0	0.142	Inf	0.825	0.945
C01B10.46|C01B10.46	4.32	5.55	1.2847	0.502	0.661
C01B10.47|C01B10.47	9.28	7.64	0.82265	0.484	0.64
C01B10.4|C01B10.4|C01B10.4	226	217	0.9624	1.8e-06	4.14e-06
C01B10.6|C01B10.6|C01B10.6a	4290	3470	0.80714	2.31e-36	1.28e-35
C01B10.6|C01B10.6|C01B10.6b	2140	1730	0.80757	1.83e-20	7.03e-20
C01B10.7|C01B10.7|C01B10.7	106	455	4.29105	2.58e-34	1.38e-33
C01B10.8|C01B10.8|C01B10.8	2240	2180	0.97459	2.84e-09	7.47e-09
C01B10.9|C01B10.9|C01B10.9	937	774	0.82636	6.91e-18	2.47e-17
C01B12.10|C01B12.10	0.647	4.25	6.57136	0.00465	0.00838
C01B12.2|C01B12.2|C01B12.2	445	498	1.11965	3.04e-17	1.07e-16
C01B12.3|C01B12.3|C01B12.3	401	370	0.92279	0.00318	0.00583
C01B12.4|C01B12.4|C01B12.4	147	108	0.73208	9.18e-05	0.00019
C01B12.5|C01B12.5|C01B12.5	107	90.3	0.8424	0.162	0.24
C01B12.8|C01B12.8|C01B12.8	1450	2850	1.96601	1.01e-79	1.13e-78
C01B12.9|C01B12.9	19.5	42.1	2.15999	0.04	0.065
C01B4.2|C01B4.2	0.131	0.164	1.25143	0.853	0.96
C01B4.6|C01B4.6|C01B4.6	365	381	1.04242	0.00254	0.0047
C01B4.7|C01B4.7|C01B4.7	588	624	1.06168	0.00267	0.00493
C01B4.8|C01B4.8|C01B4.8	199	217	1.08855	0.00297	0.00546
C01B4.9|C01B4.9|C01B4.9	1440	1130	0.7861	1.33e-14	4.28e-14
C01B7.10|C01B7.10	0.12	0.142	1.17708	0.848	0.958
C01B7.11|C01B7.11	0	0	NaN	NA	NA
C01B7.12|C01B7.12	0.12	0	0	1	1
C01B7.13|C01B7.13	0.764	2.8	3.67135	0.497	0.655
C01B7.14|C01B7.14	0.131	0.636	4.86388	0.766	0.933
C01B7.15|C01B7.15	0.12	0	0	1	1
C01B7.16|C01B7.16	0	0	NaN	NA	NA
C01B7.3|C01B7.3|C01B7.3	0.386	1	2.60465	0.995	1
C01B7.5|C01B7.5|C01B7.5	15.8	29.4	1.85669	1.02e-07	2.51e-07
C01B7.7|C01B7.7|C01B7.7	88.2	365	4.13861	7.52e-19	2.76e-18
C01B7.8|C01B7.8	0	0	NaN	NA	NA
C01B7.9|C01B7.9	0	1.01	Inf	0.509	0.668
C01B9.1|C01B9.1|C01B9.1a	478	705	1.47418	1.55e-64	1.39e-63
C01B9.1|C01B9.1|C01B9.1b	513	753	1.46829	1.03e-67	9.7e-67
C01B9.3|C01B9.3	1.69	1.96	1.1629	0.965	1
C01B9.4|C01B9.4|C01B9.4	2.89	14.3	4.96364	0.0186	0.0315
C01B9.5|C01B9.5	46	105	2.29372	0.621	0.791
C01B9.6|C01B9.6	0	0	NaN	NA	NA
C01C10.2|C01C10.2|C01C10.2a	230	252	1.09603	0.117	0.177
C01C10.2|C01C10.2|C01C10.2b	323	416	1.28683	0.442	0.592
C01C10.5|C01C10.5	0	0	NaN	NA	NA
C01C4.2|C01C4.2|C01C4.2	4.17	2	0.47973	0.0679	0.107
C01C4.3|C01C4.3|C01C4.3a	373	371	0.99392	0.000134	0.000275
C01C4.3|C01C4.3|C01C4.3b	444	470	1.05925	7.8e-10	2.1e-09
C01C4.4|C01C4.4	0.657	0.8	1.21699	0.816	0.945
C01C4.5|C01C4.5	0	1	Inf	0.649	0.82
C01C4.6|C01C4.6	0.657	0.8	1.21699	0.816	0.945
C01C4.7|C01C4.7	0	0	NaN	NA	NA
C01F1.1|C01F1.1|C01F1.1	717	928	1.29314	4.19e-59	3.46e-58
C01F1.3|C01F1.3|C01F1.3a	1540	1960	1.27673	8.74e-26	3.86e-25
C01F1.3|C01F1.3|C01F1.3b	482	678	1.40734	0.0902	0.14
C01F1.4|C01F1.4|C01F1.4	31.1	29.1	0.9356	0.365	0.501
C01F1.5|C01F1.5|C01F1.5	482	774	1.60574	2.09e-26	9.38e-26
C01F1.6|C01F1.6|C01F1.6	459	429	0.93485	0.000237	0.000476
C01F1.7|C01F1.7	0	0	NaN	NA	NA
C01F1.8|C01F1.8	0	0	NaN	NA	NA
C01F4.4|C01F4.4	0	0	NaN	NA	NA
C01F4.5|C01F4.5	0	0	NaN	NA	NA
C01F4.6|C01F4.6	0.651	0.611	0.9386	0.827	0.945
C01F4.7|C01F4.7	0	0	NaN	NA	NA
C01F4.8|C01F4.8	0	0	NaN	NA	NA
C01F4.9|C01F4.9	0	0	NaN	NA	NA
C01F6.12|C01F6.12	0	0	NaN	NA	NA
C01F6.13|C01F6.13	0.711	0.822	1.15572	0.929	1
C01F6.2|C01F6.2|C01F6.2	246	223	0.9088	0.274	0.388
C01F6.9|C01F6.9|C01F6.9	865	844	0.97611	1.14e-73	1.16e-72
C01G10.10|C01G10.10|C01G10.10	357	381	1.06683	6.43e-07	1.51e-06
C01G10.13|C01G10.13	1.15	3.64	3.17005	0.202	0.294
C01G10.14|C01G10.14|C01G10.14	180	110	0.61179	1.64e-14	5.26e-14
C01G10.15|C01G10.15|C01G10.15	471	469	0.9948	1.87e-68	1.77e-67
C01G10.16|C01G10.16|C01G10.16	66.1	159	2.41029	0.0643	0.102
C01G10.17|C01G10.17|C01G10.17	123	120	0.97717	3.18e-17	1.11e-16
C01G10.18|C01G10.18|C01G10.18	0.778	0	0	0.837	0.949
C01G10.19|C01G10.19	0.518	0	0	1	1
C01G10.1|C01G10.1|C01G10.1	167	204	1.22273	1.02e-12	3.09e-12
C01G10.4|C01G10.4|C01G10.4	140	173	1.23412	1.16e-11	3.36e-11
C01G10.5|C01G10.5|C01G10.5	156	284	1.81496	0.00481	0.00865
C01G10.6|C01G10.6|C01G10.6	352	134	0.37973	1.38e-132	2.93e-131
C01G10.7|C01G10.7|C01G10.7	679	652	0.95986	1.08e-13	3.37e-13
C01G10.8|C01G10.8|C01G10.8	4610	3960	0.85849	4.79e-127	9.65e-126
C01G10.9|C01G10.9|C01G10.9	632	583	0.92214	0.00472	0.00849
C01G12.12|C01G12.12	109	96.5	0.88537	0.258	0.367
C01G12.13|C01G12.13|C01G12.13	77.3	60.6	0.7842	0.0121	0.0208
C01G12.14|C01G12.14	0.386	0	0	1	1
C01G12.15|C01G12.15	0	0	NaN	NA	NA
C01G12.1|C01G12.1|C01G12.1	480	675	1.40566	5.05e-46	3.35e-45
C01G12.3|C01G12.3|C01G12.3	135	109	0.80835	5.32e-09	1.38e-08
C01G12.5|C01G12.5|C01G12.5	17.5	9.07	0.51843	0.012	0.0208
C01G12.7|C01G12.7|C01G12.7	52	77.8	1.49635	1.4e-12	4.2e-12
C01G12.9|C01G12.9|C01G12.9	91.4	71.3	0.7797	0.0064	0.0114
C01G5.3|C01G5.3|C01G5.3	140	176	1.2534	3.13e-14	9.95e-14
C01G5.4|C01G5.4|C01G5.4	209	293	1.40144	4.54e-36	2.5e-35
C01G5.5|C01G5.5|C01G5.5	159	157	0.98349	0.301	0.422
C01G5.6|C01G5.6|C01G5.6	905	797	0.88061	1.71e-13	5.32e-13
C01G5.7|C01G5.7|C01G5.7	53.2	28.5	0.53616	3.86e-13	1.18e-12
C01G5.9|C01G5.9|C01G5.9	209	148	0.71095	2.82e-20	1.07e-19
C01G6.10|C01G6.10	11.7	47.2	4.03677	0.0209	0.0352
C01G6.13|C01G6.13	0	0	NaN	NA	NA
C01G6.2|C01G6.2|C01G6.2	80.7	72	0.89227	0.347	0.479
C01G6.3|C01G6.3|C01G6.3	182	188	1.02824	0.605	0.774
C01G6.4|C01G6.4|C01G6.4	883	657	0.74384	2.32e-27	1.07e-26
C01G6.5|C01G6.5|C01G6.5	1610	2120	1.3229	3.35e-188	1.26e-186
C01G6.9|C01G6.9|C01G6.9	31.3	47.1	1.50458	0.784	0.945
C01G8.10|C01G8.10	0	0	NaN	NA	NA
C01G8.1|C01G8.1|C01G8.1a	135	118	0.87918	0.637	0.807
C01G8.1|C01G8.1|C01G8.1b	142	123	0.87107	0.5	0.659
C01G8.6|C01G8.6|C01G8.6	970	793	0.81759	1.13e-07	2.76e-07
C01H6.10|C01H6.10	0	0	NaN	NA	NA
C01H6.11|C01H6.11	6.34	10.2	1.61339	0.863	0.968
C01H6.2|C01H6.2|C01H6.2	276	455	1.6462	1.45e-22	5.88e-22
C01H6.3|C01H6.3|C01H6.3	129	124	0.96257	1.55e-18	5.63e-18
C01H6.4|C01H6.4|C01H6.4	634	453	0.71453	8.35e-65	7.49e-64
C01H6.6|C01H6.6|C01H6.6	1030	728	0.70548	2.94e-113	5.02e-112
C01H6.8|C01H6.8|C01H6.8a	689	2940	4.27037	NaN	NaN
C01H6.8|C01H6.8|C01H6.8b	458	1880	4.09992	NaN	NaN
C01H6.9|C01H6.9|C01H6.9	351	508	1.44653	2.91e-50	2.1e-49
C02B10.2|C02B10.2|C02B10.2	315	253	0.80287	1.04e-24	4.48e-24
C02B10.3|C02B10.3|C02B10.3	1650	1530	0.93088	0.00841	0.0147
C02B10.4|C02B10.4|C02B10.4	1700	1610	0.94621	8.53e-13	2.58e-12
C02B10.5|C02B10.5|C02B10.5	1930	1880	0.97278	8.26e-29	3.93e-28
C02B10.6|C02B10.6|C02B10.6	426	340	0.79682	0.0401	0.0651
C02B10.71|C02B10.71	0	0	NaN	NA	NA
C02B10.72|C02B10.72	0.265	0	0	1	1
C02B10.73|C02B10.73	0	0.652	Inf	0.827	0.945
C02B10.74|C02B10.74	0	0	NaN	NA	NA
C02B4.10|C02B4.10	0	0	NaN	NA	NA
C02B4.11|C02B4.11	0	0	NaN	NA	NA
C02B4.12|C02B4.12	0	0	NaN	NA	NA
C02B4.13|C02B4.13	0	0	NaN	NA	NA
C02B4.14|C02B4.14	0	0.652	Inf	0.827	0.945
C02B4.3|C02B4.3|C02B4.3	0	0.164	Inf	0.825	0.945
C02B4.4|C02B4.4|C02B4.4	75.2	69.4	0.92214	3.21e-09	8.41e-09
C02B4.5|C02B4.5	0	0	NaN	NA	NA
C02B4.6|C02B4.6	0	1.66	Inf	0.224	0.323
C02B4.7|C02B4.7	0	0	NaN	NA	NA
C02B4.8|C02B4.8	2.62	9.24	3.52706	3.46e-05	7.36e-05
C02B4.9|C02B4.9	0	0.495	Inf	0.773	0.937
C02B4.t1|C02B4.t1	0	0	NaN	NA	NA
C02B4.t2|C02B4.t2	0	0	NaN	NA	NA
C02B8.11|C02B8.11	0	0.706	Inf	0.726	0.894
C02B8.1|C02B8.1|C02B8.1	151	356	2.35405	0.37	0.507
C02B8.3|C02B8.3|C02B8.3	167	114	0.6813	6.03e-12	1.77e-11
C02B8.5|C02B8.5|C02B8.5	77.9	56.1	0.72069	0.000138	0.000283
C02B8.6|C02B8.6|C02B8.6	246	248	1.01043	5.22e-05	0.00011
C02B8.7|C02B8.7|C02B8.7	0.261	0	0	1	1
C02C2.4|C02C2.4|C02C2.4	687	402	0.58539	3.79e-129	7.79e-128
C02C2.5|C02C2.5|C02C2.5	184	112	0.60998	1.14e-28	5.38e-28
C02C6.10|C02C6.10	0	0	NaN	NA	NA
C02C6.11|C02C6.11	0	0	NaN	NA	NA
C02C6.12|C02C6.12	0	0	NaN	NA	NA
C02C6.3|C02C6.3|C02C6.3a	1090	1040	0.9514	1.32e-06	3.05e-06
C02C6.3|C02C6.3|C02C6.3b	602	527	0.87652	2.55e-10	7.01e-10
C02C6.3|C02C6.3|C02C6.3c	104	119	1.14132	0.312	0.436
C02C6.3|C02C6.3|C02C6.3d	383	449	1.17191	0.00309	0.00567
C02C6.4|C02C6.4	0	0	NaN	NA	NA
C02C6.5|C02C6.5	0	0.353	Inf	0.826	0.945
C02C6.6|C02C6.6	0	0	NaN	NA	NA
C02C6.7|C02C6.7	0	0	NaN	NA	NA
C02C6.8|C02C6.8	0	0	NaN	NA	NA
C02C6.9|C02C6.9	0	0	NaN	NA	NA
C02D4.10|C02D4.10	0.261	0	0	1	1
C02D4.11|C02D4.11	0	0.847	Inf	0.624	0.794
C02D4.12|C02D4.12	6.2	8.06	1.29981	0.0382	0.0621
C02D4.13|C02D4.13	0.261	0	0	1	1
C02D4.14|C02D4.14	0	0	NaN	NA	NA
C02D4.15|C02D4.15	24.6	38.5	1.5646	3.88e-08	9.69e-08
C02D4.16|C02D4.16	24.6	38.8	1.57895	2.8e-08	7.03e-08
C02D4.5|C02D4.5	0.386	0	0	1	1
C02D4.6|C02D4.6	0	0	NaN	NA	NA
C02D4.7|C02D4.7	0	0	NaN	NA	NA
C02D4.8|C02D4.8	0.12	0	0	1	1
C02D4.9|C02D4.9	0	0.164	Inf	0.825	0.945
C02D4.t1|C02D4.t1	0.382	1	2.63173	0.994	1
C02D5.2|C02D5.2|C02D5.2a	482	458	0.94983	3.95e-09	1.03e-08
C02D5.2|C02D5.2|C02D5.2b	397	367	0.92445	2.25e-09	5.95e-09
C02D5.4|C02D5.4|C02D5.4	953	1140	1.19574	0.0287	0.0475
C02D5.5|C02D5.5	0	0	NaN	NA	NA
C02E7.10|C02E7.10|C02E7.10	10.2	10.2	0.99969	0.195	0.284
C02E7.16|C02E7.16	0.265	0.447	1.68627	0.769	0.935
C02E7.17|C02E7.17	0	1.3	Inf	0.578	0.744
C02E7.6|C02E7.6|C02E7.6	1410	4870	3.45079	NaN	NaN
C02E7.7|C02E7.7|C02E7.7	1260	4740	3.76273	NaN	NaN
C02E7.8|C02E7.8|C02E7.8	0.386	1	2.60465	0.995	1
C02F12.10|C02F12.10|C02F12.10	9.05	26.7	2.94531	0.00633	0.0113
C02F12.3|C02F12.3|C02F12.3	1510	1060	0.70497	9.87e-124	1.92e-122
C02F12.5|C02F12.5|C02F12.5	249	156	0.62724	9.9e-37	5.55e-36
C02F12.8|C02F12.8|C02F12.8	109	148	1.36388	2.41e-15	7.95e-15
C02F12.9|C02F12.9|C02F12.9	6.68	11.3	1.68523	0.0115	0.0198
C02F12.t1|C02F12.t1	0	0.652	Inf	0.827	0.945
C02F4.10|C02F4.10	0.382	2.1	5.49484	0.557	0.722
C02F4.11|C02F4.11	0.131	0	0	1	1
C02F4.4|C02F4.4|C02F4.4	343	811	2.36144	1.91e-86	2.32e-85
C02F4.5|C02F4.5|C02F4.5	0.131	0	0	1	1
C02F4.9|C02F4.9	0.396	0	0	1	1
C02F5.10|C02F5.10|C02F5.10	92.5	99.3	1.07325	1.25e-07	3.05e-07
C02F5.12|C02F5.12|C02F5.12	183	312	1.70336	1.09e-24	4.7e-24
C02F5.13|C02F5.13|C02F5.13	353	506	1.43292	1.03e-08	2.63e-08
C02F5.14|C02F5.14|C02F5.14	617	3790	6.15142	NaN	NaN
C02F5.2|C02F5.2|C02F5.2	45.6	30.1	0.65952	0.000294	0.000585
C02F5.3|C02F5.3|C02F5.3	2530	1840	0.72611	6.79e-86	8.24e-85
C02F5.5|C02F5.5|C02F5.5	228	140	0.61481	8.04e-20	3.03e-19
C02F5.6|C02F5.6|C02F5.6a	445	343	0.77118	1.24e-07	3.02e-07
C02F5.6|C02F5.6|C02F5.6b	531	443	0.83325	3.32e-09	8.69e-09
C02F5.7|C02F5.7|C02F5.7a	2270	3010	1.32699	3.45e-233	1.74e-231
C02F5.7|C02F5.7|C02F5.7b	1430	1720	1.20779	1.24e-78	1.36e-77
C02G6.1|C02G6.1|C02G6.1	288	455	1.58205	1.91e-64	1.7e-63
C02G6.2|C02G6.2|C02G6.2	96.7	153	1.58493	1.49e-28	7.05e-28
C02G6.3|C02G6.3|C02G6.3	85.2	152	1.78373	0.136	0.204
C02G6.5|C02G6.5	2.4	5.32	2.21365	0.0023	0.00427
C02H6.1|C02H6.1|C02H6.1	36.3	14.8	0.40796	3.24e-12	9.6e-12
C02H7.4|C02H7.4	0	0	NaN	NA	NA
C02H7.5|C02H7.5	0	0	NaN	NA	NA
C03A3.1|C03A3.1|C03A3.1a	366	227	0.62027	1.41e-60	1.19e-59
C03A3.1|C03A3.1|C03A3.1b	352	215	0.61155	1.06e-67	9.92e-67
C03A3.2|C03A3.2|C03A3.2	2250	2020	0.89773	0.937	1
C03A3.3|C03A3.3|C03A3.3	48.4	207	4.27005	8.53e-18	3.04e-17
C03A3.4|C03A3.4	0	0	NaN	NA	NA
C03A3.5|C03A3.5	0	0	NaN	NA	NA
C03A3.6|C03A3.6	0	0.142	Inf	0.825	0.945
C03A3.7|C03A3.7	0.265	0	0	1	1
C03A3.8|C03A3.8	0	0	NaN	NA	NA
C03A3.t1|C03A3.t1	0	0	NaN	NA	NA
C03A7.12|C03A7.12|C03A7.12	25.6	48.5	1.89478	3.98e-06	8.97e-06
C03A7.13|C03A7.13|C03A7.13	41.4	42.8	1.03202	0.000452	0.000887
C03A7.15|C03A7.15	37.1	24.7	0.66485	0.962	1
C03A7.2|C03A7.2|C03A7.2	16.5	26.3	1.59654	3.68e-05	7.82e-05
C03B1.10|C03B1.10|C03B1.10	3.48	1.59	0.45808	0.176	0.259
C03B1.13|C03B1.13|C03B1.13	264	251	0.94935	0.0253	0.0421
C03B1.14|C03B1.14|C03B1.14	313	346	1.10262	6.43e-25	2.78e-24
C03B1.16|C03B1.16	0	0	NaN	NA	NA
C03B1.1|C03B1.1|C03B1.1	0.627	0.353	0.56286	0.964	1
C03B1.2|C03B1.2|C03B1.2	41.8	25.8	0.61733	1.04e-09	2.78e-09
C03B1.3|C03B1.3|C03B1.3	4.67	1.29	0.27607	0.0111	0.0193
C03B1.4|C03B1.4|C03B1.4	1.94	0.517	0.26624	0.269	0.382
C03B1.5|C03B1.5|C03B1.5	81.1	88.9	1.09601	0.407	0.551
C03B1.6|C03B1.6|C03B1.6a	8.78	7.82	0.89095	0.0163	0.0278
C03B1.6|C03B1.6|C03B1.6b	28.2	28.5	1.01031	0.000289	0.000576
C03B1.7|C03B1.7|C03B1.7	199	290	1.45734	4.39e-26	1.96e-25
C03B1.9|C03B1.9|C03B1.9	33.2	15.3	0.46261	5.92e-19	2.18e-18
C03B8.2|C03B8.2|C03B8.2	151	231	1.52767	0.0283	0.0469
C03B8.3|C03B8.3|C03B8.3	112	87.2	0.77869	2.95e-05	6.31e-05
C03B8.5|C03B8.5	0.12	0	0	1	1
C03B8.6|C03B8.6	0	0	NaN	NA	NA
C03C10.10|C03C10.10	0	0	NaN	NA	NA
C03C10.11|C03C10.11	0	0	NaN	NA	NA
C03C10.12|C03C10.12	0	0	NaN	NA	NA
C03C10.2|C03C10.2|C03C10.2	127	87.7	0.69034	1.83e-08	4.64e-08
C03C10.4|C03C10.4|C03C10.4	813	836	1.02883	1.46e-15	4.84e-15
C03C10.5|C03C10.5|C03C10.5	1.8	5.99	3.31769	0.0615	0.0974
C03C10.7|C03C10.7|C03C10.7	123	165	1.34399	0.0652	0.103
C03C10.9|C03C10.9|C03C10.9	1.17	3.1	2.64623	0.629	0.799
C03C11.1|C03C11.1|C03C11.1	143	116	0.81053	0.09	0.139
C03C11.5|C03C11.5	0.265	0	0	1	1
C03C11.6|C03C11.6	0.131	0	0	1	1
C03C11.7|C03C11.7	0	0	NaN	NA	NA
C03C11.8|C03C11.8	0.265	0.353	1.32969	0.93	1
C03D6.1|C03D6.1|C03D6.1	492	400	0.81203	2.21e-76	2.35e-75
C03E10.1|C03E10.1|C03E10.1	0.131	0.652	4.98358	0.965	1
C03E10.3|C03E10.3|C03E10.3	64.1	34.9	0.54542	2.36e-12	7.04e-12
C03E10.8|C03E10.8	0	0.142	Inf	0.825	0.945
C03E10.9|C03E10.9	0	0	NaN	NA	NA
C03F11.1|C03F11.1|C03F11.1	31.6	31.3	0.99066	0.212	0.307
C03F11.2|C03F11.2|C03F11.2	69.1	85.8	1.24224	0.000442	0.000867
C03F11.4|C03F11.4|C03F11.4	1150	729	0.63518	1.23e-174	4.02e-173
C03F11.5|C03F11.5	0	0	NaN	NA	NA
C03F11.6|C03F11.6	0	0	NaN	NA	NA
C03F11.7|C03F11.7	0.651	0.652	1.0015	1	1
C03F11.t1|C03F11.t1	0	0.652	Inf	0.827	0.945
C03G6.17|C03G6.17|C03G6.17	308	185	0.60067	5.3e-38	3.06e-37
C03G6.5|C03G6.5|C03G6.5	528	846	1.60449	0.00677	0.012
C03G6.6|C03G6.6|C03G6.6	3.59	2.93	0.81693	0.726	0.894
C03H12.1|C03H12.1|C03H12.1	679	809	1.19147	9.33e-30	4.54e-29
C03H12.2|C03H12.2	0.513	0.822	1.60244	0.921	1
C03H12.3|C03H12.3	0.513	0.822	1.60244	0.921	1
C03H5.2|C03H5.2|C03H5.2	1440	1260	0.87422	8.56e-38	4.91e-37
C03H5.3|C03H5.3|C03H5.3	720	597	0.82911	7.36e-17	2.55e-16
C03H5.4|C03H5.4|C03H5.4	2.78	4.59	1.65352	0.391	0.532
C03H5.5|C03H5.5|C03H5.5	364	455	1.24963	2.93e-16	9.94e-16
C03H5.6|C03H5.6|C03H5.6	213	166	0.77852	0.0148	0.0254
C03H5.7|C03H5.7|C03H5.7	5.22	13.4	2.56071	0.0115	0.0198
C03H5.8|C03H5.8	0	0	NaN	NA	NA
C04A11.1|C04A11.1|C04A11.1	150	110	0.73449	0.245	0.351
C04A11.2|C04A11.2|C04A11.2	21	40.3	1.92196	3.89e-06	8.79e-06
C04A11.5|C04A11.5|C04A11.5	101	328	3.25479	0.00303	0.00556
C04A11.6|C04A11.6	0	0	NaN	NA	NA
C04A11.7|C04A11.7	0	0	NaN	NA	NA
C04A11.8|C04A11.8	0	0	NaN	NA	NA
C04A11.t1|C04A11.t1	0.261	1.96	7.48544	0.538	0.701
C04A2.10|C04A2.10	0	0	NaN	NA	NA
C04A2.11|C04A2.11	3.48	8.27	2.37469	0.959	1
C04A2.12|C04A2.12	0	0	NaN	NA	NA
C04A2.13|C04A2.13	0	0	NaN	NA	NA
C04A2.14|C04A2.14	0.265	0	0	1	1
C04A2.8|C04A2.8	0	0	NaN	NA	NA
C04A2.9|C04A2.9	0	0	NaN	NA	NA
C04A2.t1|C04A2.t1	0	0.652	Inf	0.827	0.945
C04B4.1|C04B4.1|C04B4.1	25.2	22.8	0.90458	0.179	0.262
C04B4.2|C04B4.2|C04B4.2	23.7	10.3	0.4351	2.44e-08	6.16e-08
C04B4.4|C04B4.4|C04B4.4	0	0.706	Inf	0.726	0.894
C04B4.5|C04B4.5|C04B4.5	0	0	NaN	NA	NA
C04B4.6|C04B4.6|C04B4.6	0	0	NaN	NA	NA
C04C11.10|C04C11.10	0	0	NaN	NA	NA
C04C11.11|C04C11.11	0	0	NaN	NA	NA
C04C11.12|C04C11.12	0	0	NaN	NA	NA
C04C11.13|C04C11.13	0	0	NaN	NA	NA
C04C11.14|C04C11.14	0	0	NaN	NA	NA
C04C11.15|C04C11.15	0	0	NaN	NA	NA
C04C11.16|C04C11.16	0	0	NaN	NA	NA
C04C11.17|C04C11.17	0	0	NaN	NA	NA
C04C11.18|C04C11.18	0	0	NaN	NA	NA
C04C11.19|C04C11.19	0	0	NaN	NA	NA
C04C11.1|C04C11.1	25.6	17.1	0.66809	0.917	1
C04C11.1|C04C11.1|C04C11.1a	27.7	19.7	0.71084	0.952	1
C04C11.20|C04C11.20	0	0	NaN	NA	NA
C04C11.21|C04C11.21	0.131	0.284	2.16773	0.83	0.945
C04C11.22|C04C11.22	0	0	NaN	NA	NA
C04C11.5|C04C11.5	0.908	0	0	0.757	0.924
C04C11.6|C04C11.6	0	0.794	Inf	0.704	0.873
C04C11.7|C04C11.7	0	0	NaN	NA	NA
C04C11.8|C04C11.8	0.386	6.16	15.9635	0.00145	0.00274
C04C11.9|C04C11.9	0	0.936	Inf	0.59	0.757
C04C3.10|C04C3.10	0	0	NaN	NA	NA
C04C3.11|C04C3.11	0	0	NaN	NA	NA
C04C3.12|C04C3.12	0	0	NaN	NA	NA
C04C3.13|C04C3.13	0	0	NaN	NA	NA
C04C3.3|C04C3.3|C04C3.3	5120	4650	0.90696	4.2e-52	3.13e-51
C04C3.4|C04C3.4|C04C3.4	29.2	66.6	2.27816	0.628	0.798
C04C3.6|C04C3.6|C04C3.6	13.3	6.69	0.5027	0.0036	0.00656
C04C3.7|C04C3.7|C04C3.7	0.57	0.469	0.82268	1	1
C04C3.9|C04C3.9|C04C3.9	12.1	27.5	2.27696	0.55	0.714
C04D8.2|C04D8.2	0	0.142	Inf	0.825	0.945
C04D8.3|C04D8.3	0.12	0.652	5.41216	0.961	1
C04D8.4|C04D8.4	0.12	0	0	1	1
C04D8.5|C04D8.5	0.396	0.164	0.41333	1	1
C04E12.10|C04E12.10|C04E12.10	8.68	3.23	0.37259	0.0185	0.0314
C04E12.2|C04E12.2|C04E12.2	544	605	1.11139	2.14e-13	6.61e-13
C04E12.4|C04E12.4|C04E12.4	419	393	0.93708	7.23e-13	2.19e-12
C04E12.5|C04E12.5|C04E12.5	234	82.4	0.35305	9.44e-88	1.17e-86
C04E12.6|C04E12.6|C04E12.6	33.9	22.6	0.66524	8.54e-10	2.29e-09
C04E6.11|C04E6.11|C04E6.11	844	1070	1.27048	6.26e-53	4.71e-52
C04E6.12|C04E6.12	37.5	75.4	2.01034	3.74e-06	8.45e-06
C04E6.13|C04E6.13|C04E6.13	190	625	3.28562	3.46e-24	1.47e-23
C04E6.14|C04E6.14	0	0	NaN	NA	NA
C04E6.3|C04E6.3|C04E6.3	0	0	NaN	NA	NA
C04E6.4|C04E6.4|C04E6.4	94.5	115	1.21311	2.68e-09	7.05e-09
C04E6.5|C04E6.5|C04E6.5	172	135	0.78804	0.00329	0.00602
C04E6.7|C04E6.7|C04E6.7	517	417	0.80573	1.22e-29	5.9e-29
C04E6.8|C04E6.8|C04E6.8	73.4	70.1	0.95479	7.41e-05	0.000154
C04E7.1|C04E7.1|C04E7.1	0.768	0.495	0.64433	1	1
C04E7.3|C04E7.3|C04E7.3	90	128	1.42719	8.19e-18	2.92e-17
C04E7.4|C04E7.4|C04E7.4	148	200	1.35578	6.85e-15	2.23e-14
C04E7.5|C04E7.5|C04E7.5	1.04	2.94	2.83549	0.606	0.774
C04E7.7|C04E7.7	1.61	7.53	4.67987	0.0902	0.14
C04E7.t1|C04E7.t1	1.61	6.23	3.86954	0.204	0.296
C04F1.1|C04F1.1|C04F1.1	206	2420	11.769	NaN	NaN
C04F1.4|C04F1.4	0.657	0.936	1.42316	0.96	1
C04F1.5|C04F1.5	0	0.353	Inf	0.826	0.945
C04F12.12|C04F12.12|C04F12.12	42.7	34.7	0.81174	0.0272	0.0451
C04F12.15|C04F12.15	0.261	0	0	1	1
C04F12.1|C04F12.1|C04F12.1	453	627	1.38243	3.84e-60	3.22e-59
C04F12.5|C04F12.5|C04F12.5	266	240	0.90131	1.65e-35	9e-35
C04F12.6|C04F12.6|C04F12.6	94.9	81.1	0.85479	0.449	0.6
C04F12.7|C04F12.7|C04F12.7	593	493	0.83058	6.14e-29	2.93e-28
C04F12.8|C04F12.8|C04F12.8	235	180	0.76845	0.000117	0.000241
C04F12.t1|C04F12.t1	1.23	1.46	1.18732	1	1
C04F2.t1|C04F2.t1	0	0	NaN	NA	NA
C04F5.2|C04F5.2|C04F5.2	7.57	9	1.18963	0.135	0.203
C04F5.8|C04F5.8|C04F5.8	1620	1270	0.78684	9.91e-37	5.55e-36
C04F5.9|C04F5.9|C04F5.9	239	320	1.33968	1.13e-11	3.27e-11
C04F6.2|C04F6.2|C04F6.2	42.8	89.9	2.10366	0.0786	0.123
C04F6.7|C04F6.7|C04F6.7	16.7	23.3	1.39372	0.00241	0.00446
C04F6.8|C04F6.8	0	0	NaN	NA	NA
C04G2.10|C04G2.10|C04G2.10a	362	295	0.81502	8.59e-38	4.93e-37
C04G2.10|C04G2.10|C04G2.10b	330	274	0.83161	1.36e-36	7.6e-36
C04G2.11|C04G2.11|C04G2.11	11.6	5.97	0.51379	0.000159	0.000323
C04G2.12|C04G2.12	24.8	11.9	0.47857	3.57e-06	8.07e-06
C04G2.2|C04G2.2|C04G2.2	131	151	1.15168	3.35e-07	7.98e-07
C04G2.3|C04G2.3	465	354	0.7615	3.7e-08	9.25e-08
C04G2.5|C04G2.5|C04G2.5	167	95.1	0.57095	1.8e-22	7.26e-22
C04G2.8|C04G2.8|C04G2.8	1200	886	0.74023	4.17e-20	1.58e-19
C04G2.9|C04G2.9|C04G2.9	796	624	0.78427	1.11e-05	2.44e-05
C04G6.10|C04G6.10|C04G6.10	102	320	3.13355	1.52e-42	9.54e-42
C04G6.11|C04G6.11|C04G6.11	0.241	0	0	1	1
C04G6.12|C04G6.12	0	0.142	Inf	0.825	0.945
C04G6.13|C04G6.13|C04G6.13	7.75	75.1	9.68478	3.25e-18	1.17e-17
C04G6.14|C04G6.14	7.21	10.2	1.41728	0.0614	0.0973
C04G6.2|C04G6.2|C04G6.2	255	698	2.74057	2.49e-46	1.67e-45
C04G6.4|C04G6.4|C04G6.4	563	610	1.08415	0.00161	0.00302
C04G6.5|C04G6.5|C04G6.5	88.4	304	3.44134	1.99e-16	6.79e-16
C04G6.6|C04G6.6|C04G6.6	99.4	185	1.86226	3.28e-39	1.93e-38
C04G6.7|C04G6.7|C04G6.7	112	179	1.60327	7.97e-10	2.14e-09
C04H4.1|C04H4.1|C04H4.1	7.48	24	3.20416	0.00091	0.00174
C04H4.2|C04H4.2	0	0	NaN	NA	NA
C04H4.3|C04H4.3	0	0	NaN	NA	NA
C04H4.4|C04H4.4	0	2.61	Inf	0.133	0.2
C04H4.5|C04H4.5	0	0	NaN	NA	NA
C04H4.6|C04H4.6	0	0	NaN	NA	NA
C04H5.10|C04H5.10	0	0	NaN	NA	NA
C04H5.1|C04H5.1|C04H5.1	531	445	0.83715	1.03e-15	3.46e-15
C04H5.7|C04H5.7|C04H5.7a	0.906	3.95	4.36247	0.0858	0.133
C04H5.7|C04H5.7|C04H5.7b	7.07	19.4	2.74937	0.0114	0.0198
C04H5.9|C04H5.9	0.633	6.35	10.0255	0.00475	0.00855
C05A2.2|C05A2.2	0	0	NaN	NA	NA
C05A2.3|C05A2.3	0.265	0.142	0.53454	0.88	0.981
C05A9.10|C05A9.10	0.265	0.425	1.60362	0.772	0.937
C05A9.11|C05A9.11	0	0	NaN	NA	NA
C05A9.2|C05A9.2|C05A9.2	579	443	0.76508	5.62e-28	2.62e-27
C05A9.3|C05A9.3	0	0	NaN	NA	NA
C05A9.4|C05A9.4	0	0	NaN	NA	NA
C05A9.5|C05A9.5	0	0.284	Inf	0.808	0.945
C05A9.6|C05A9.6	0	0.284	Inf	0.808	0.945
C05A9.7|C05A9.7	0.653	2.26	3.45613	0.0883	0.137
C05A9.8|C05A9.8	0	0	NaN	NA	NA
C05A9.9|C05A9.9	0.265	0.425	1.60362	0.772	0.937
C05B10.14|C05B10.14	0.12	0	0	1	1
C05B10.15|C05B10.15	0.241	0	0	1	1
C05B10.16|C05B10.16	0	0.142	Inf	0.825	0.945
C05B10.17|C05B10.17	9.58	13.1	1.37005	0.00473	0.00851
C05B10.18|C05B10.18	0	0.164	Inf	0.825	0.945
C05B10.19|C05B10.19	0.241	0	0	1	1
C05B10.20|C05B10.20	0	0	NaN	NA	NA
C05B10.21|C05B10.21	0	0	NaN	NA	NA
C05B5.10|C05B5.10	0.843	0	0	0.673	0.845
C05B5.11|C05B5.11|C05B5.11	1.54	2.79	1.81346	0.28	0.396
C05B5.12|C05B5.12|C05B5.12	25.8	18.4	0.71427	0.0109	0.0188
C05B5.13|C05B5.13	0.12	0.142	1.17708	0.848	0.958
C05B5.14|C05B5.14	0.382	0	0	1	1
C05B5.15|C05B5.15	0	0	NaN	NA	NA
C05B5.1|C05B5.1|C05B5.1	1.02	1.77	1.74669	1	1
C05B5.2|C05B5.2|C05B5.2	173	257	1.48126	0.00418	0.00757
C05B5.4|C05B5.4|C05B5.4	133	91.4	0.68568	0.000189	0.000382
C05B5.5|C05B5.5|C05B5.5	136	219	1.60666	0.00782	0.0138
C05B5.8|C05B5.8|C05B5.8	433	726	1.67503	0.429	0.577
C05B5.9|C05B5.9	24.9	16.6	0.66588	0.00152	0.00286
C05C10.2|C05C10.2|C05C10.2a	902	1180	1.30573	2.76e-87	3.4e-86
C05C10.2|C05C10.2|C05C10.2b	1820	2370	1.30536	9.36e-170	2.94e-168
C05C10.3|C05C10.3|C05C10.3	5800	5070	0.87368	1.62e-07	3.94e-07
C05C10.5|C05C10.5|C05C10.5a	143	149	1.04053	0.0532	0.0849
C05C10.5|C05C10.5|C05C10.5b	93	93	1.00041	0.218	0.314
C05C10.5|C05C10.5|C05C10.5c	270	268	0.99069	0.0861	0.133
C05C10.7|C05C10.7|C05C10.7	275	465	1.68704	0.000368	0.000727
C05C10.8|C05C10.8|C05C10.8	1.48	2.99	2.02643	1	1
C05C12.10|C05C12.10	0	0	NaN	NA	NA
C05C12.1|C05C12.1|C05C12.1	153	154	1.00415	0.0101	0.0175
C05C12.4|C05C12.4|C05C12.4	1400	2280	1.62872	6.32e-07	1.49e-06
C05C12.5|C05C12.5|C05C12.5	152	112	0.7383	8.06e-05	0.000168
C05C12.6|C05C12.6|C05C12.6	149	167	1.12732	1.33e-12	3.99e-12
C05C8.10|C05C8.10	5.67	7.67	1.35335	0.0376	0.0613
C05C8.1|C05C8.1|C05C8.1a	1230	2730	2.21954	NaN	NaN
C05C8.1|C05C8.1|C05C8.1b	541	1190	2.20819	4.61e-09	1.2e-08
C05C8.2|C05C8.2|C05C8.2	1860	1570	0.84247	5.5e-18	1.97e-17
C05C8.5|C05C8.5|C05C8.5	832	814	0.97792	3.64e-10	9.95e-10
C05C8.6|C05C8.6|C05C8.6	711	616	0.86673	0.14	0.209
C05C8.7|C05C8.7|C05C8.7	9670	9120	0.94312	0.247	0.352
C05C8.8|C05C8.8|C05C8.8	16.6	8.97	0.53869	1.34e-05	2.93e-05
C05C9.10|C05C9.10	0	0	NaN	NA	NA
C05C9.11|C05C9.11	0.265	0.164	0.61718	0.884	0.985
C05C9.12|C05C9.12	0	0.652	Inf	0.827	0.945
C05C9.13|C05C9.13	0	0.353	Inf	0.826	0.945
C05C9.14|C05C9.14	0	0.353	Inf	0.826	0.945
C05C9.1|C05C9.1|C05C9.1	173	405	2.34092	1.34e-71	1.33e-70
C05C9.2|C05C9.2|C05C9.2	17.4	45.1	2.59983	0.109	0.166
C05C9.3|C05C9.3|C05C9.3	146	202	1.38054	9.08e-20	3.42e-19
C05C9.5|C05C9.5	0	0	NaN	NA	NA
C05C9.6|C05C9.6	0	0	NaN	NA	NA
C05C9.7|C05C9.7	1.87	7.53	4.02535	0.205	0.297
C05C9.8|C05C9.8	0.131	0	0	1	1
C05C9.9|C05C9.9	0	0	NaN	NA	NA
C05C9.t1|C05C9.t1	1.61	6.23	3.86954	0.204	0.296
C05C9.t2|C05C9.t2	1.61	6.23	3.86954	0.204	0.296
C05D10.1|C05D10.1|C05D10.1a	954	1060	1.11451	3.33e-16	1.13e-15
C05D10.1|C05D10.1|C05D10.1b	714	786	1.10039	1.24e-14	3.99e-14
C05D10.1|C05D10.1|C05D10.1c	3190	3390	1.06266	8.01e-41	4.88e-40
C05D10.2|C05D10.2|C05D10.2a	107	142	1.33475	2.1e-11	6.04e-11
C05D10.2|C05D10.2|C05D10.2b	126	173	1.37345	3.28e-15	1.08e-14
C05D10.2|C05D10.2|C05D10.2c	103	138	1.34015	4.09e-11	1.16e-10
C05D10.4|C05D10.4|C05D10.4a	562	870	1.54702	1.09e-73	1.12e-72
C05D10.4|C05D10.4|C05D10.4b	597	966	1.61745	7.76e-76	8.2e-75
C05D10.4|C05D10.4|C05D10.4c	467	747	1.59808	1.07e-64	9.55e-64
C05D11.10|C05D11.10|C05D11.10	1030	2240	2.17016	NaN	NaN
C05D11.13|C05D11.13|C05D11.13	221	192	0.87133	0.000104	0.000215
C05D11.1|C05D11.1|C05D11.1	2550	2690	1.05664	8.13e-30	3.96e-29
C05D11.5|C05D11.5|C05D11.5	416	366	0.87943	1.29e-17	4.56e-17
C05D11.7|C05D11.7|C05D11.7a	1330	1750	1.31022	2.62e-210	1.15e-208
C05D11.7|C05D11.7|C05D11.7b	764	989	1.29564	6.62e-112	1.12e-110
C05D11.8|C05D11.8|C05D11.8	455	619	1.36192	5.08e-52	3.78e-51
C05D11.9|C05D11.9|C05D11.9	965	934	0.96725	0.0575	0.0913
C05D12.10|C05D12.10	0	0	NaN	NA	NA
C05D12.11|C05D12.11	0	0	NaN	NA	NA
C05D12.1|C05D12.1|C05D12.1	790	1030	1.30394	1.77e-30	8.74e-30
C05D12.2|C05D12.2|C05D12.2	107	148	1.3766	1.69e-15	5.59e-15
C05D12.3|C05D12.3	1720	1910	1.10632	1.86e-48	1.3e-47
C05D12.3|C05D12.3|C05D12.3a	1750	1940	1.10622	6.6e-50	4.72e-49
C05D12.3|C05D12.3|C05D12.3c	3380	3680	1.089	5.01e-102	7.48e-101
C05D12.4|C05D12.4|C05D12.4	190	240	1.26641	0.00702	0.0124
C05D12.5|C05D12.5|C05D12.5	3.23	7.77	2.40434	0.139	0.208
C05D12.7|C05D12.7|C05D12.7	151	117	0.77243	0.00126	0.00238
C05D12.8|C05D12.8	0	0.652	Inf	0.827	0.945
C05D12.9|C05D12.9	0	0	NaN	NA	NA
C05D2.10|C05D2.10|C05D2.10a	1840	1670	0.90671	2.18e-07	5.25e-07
C05D2.10|C05D2.10|C05D2.10b	869	784	0.90245	0.000232	0.000466
C05D2.11|C05D2.11	344	387	1.12507	8.55e-15	2.77e-14
C05D2.12|C05D2.12	0	0	NaN	NA	NA
C05D2.13|C05D2.13	0	0	NaN	NA	NA
C05D2.14|C05D2.14	0.913	4.38	4.80129	4.39e-06	9.89e-06
C05D2.15|C05D2.15	0.527	1.43	2.70768	0.544	0.707
C05D2.16|C05D2.16	0	0.353	Inf	0.826	0.945
C05D2.17|C05D2.17	0.647	0.306	0.47192	1	1
C05D2.3|C05D2.3|C05D2.3	169	163	0.96334	0.0735	0.115
C05D2.6|C05D2.6|C05D2.6a	338	455	1.34588	3.76e-21	1.47e-20
C05D2.6|C05D2.6|C05D2.6b	291	369	1.26873	2.95e-14	9.37e-14
C05D2.8|C05D2.8|C05D2.8	1040	1100	1.06082	0.224	0.323
C05D9.10|C05D9.10	0	0	NaN	NA	NA
C05D9.11|C05D9.11	0	0	NaN	NA	NA
C05D9.3|C05D9.3|C05D9.3	938	831	0.88558	0.0137	0.0236
C05D9.4|C05D9.4|C05D9.4	6.66	11.9	1.78792	0.0031	0.00568
C05D9.7|C05D9.7|C05D9.7	264	317	1.19878	0.373	0.51
C05D9.9|C05D9.9|C05D9.9a	295	274	0.93042	4.9e-42	3.04e-41
C05D9.9|C05D9.9|C05D9.9b	503	456	0.90608	6.96e-71	6.83e-70
C05E11.10|C05E11.10	9.82	4.84	0.49353	0.0873	0.135
C05E11.11|C05E11.11	0.131	0.164	1.25143	0.853	0.96
C05E11.12|C05E11.12	0.131	0.306	2.3353	0.83	0.945
C05E11.13|C05E11.13	0	0	NaN	NA	NA
C05E11.14|C05E11.14	0	0	NaN	NA	NA
C05E11.15|C05E11.15	0.584	0.164	0.28017	1	1
C05E11.16|C05E11.16	0.527	1.23	2.3272	0.384	0.523
C05E11.17|C05E11.17	0	0	NaN	NA	NA
C05E11.18|C05E11.18	0	0.164	Inf	0.825	0.945
C05E11.2|C05E11.2|C05E11.2	1.53	6.22	4.05901	0.558	0.723
C05E11.3|C05E11.3|C05E11.3	448	475	1.06174	1.37e-16	4.7e-16
C05E11.6|C05E11.6|C05E11.6	64.2	146	2.27732	0.674	0.847
C05E11.7|C05E11.7|C05E11.7	113	196	1.73317	1.82e-17	6.41e-17
C05E11.9|C05E11.9	0.265	0.706	2.65937	0.829	0.945
C05E4.12|C05E4.12|C05E4.12	5.35	4.23	0.79124	0.0915	0.141
C05E4.7|C05E4.7|C05E4.7	0	0	NaN	NA	NA
C05E7.1|C05E7.1|C05E7.1	593	1740	2.92586	0	0
C05E7.2|C05E7.2|C05E7.2	582	647	1.11265	0.25	0.356
C05E7.3|C05E7.3|C05E7.3	60	60.7	1.0109	0.00263	0.00485
C05E7.4|C05E7.4|C05E7.4	25.9	21.8	0.8427	0.0269	0.0447
C05E7.5|C05E7.5	0	0	NaN	NA	NA
C05E7.6|C05E7.6	0	0	NaN	NA	NA
C05E7.t1|C05E7.t1	0	0.142	Inf	0.825	0.945
C05E7.t2|C05E7.t2	0	0.142	Inf	0.825	0.945
C05E7.t3|C05E7.t3	1.61	6.23	3.86954	0.204	0.296
C05G5.10|C05G5.10	0	0	NaN	NA	NA
C05G5.1|C05G5.1|C05G5.1	433	453	1.04719	0.127	0.192
C05G5.2|C05G5.2|C05G5.2	265	304	1.14502	7.75e-10	2.09e-09
C05G5.3|C05G5.3|C05G5.3	293	376	1.28345	1.59e-16	5.44e-16
C05G5.4|C05G5.4|C05G5.4	5730	5270	0.91914	3.71e-105	5.76e-104
C05G5.5|C05G5.5|C05G5.5	15.9	18.3	1.15297	0.285	0.402
C05G5.7|C05G5.7|C05G5.7	86.2	149	1.72669	0.238	0.341
C05G5.8|C05G5.8	1.6	2.3	1.44222	0.838	0.95
C05G5.9|C05G5.9	0	0	NaN	NA	NA
C05G6.4|C05G6.4	0.836	3.17	3.7916	0.0989	0.152
C05G6.5|C05G6.5	0.836	3.17	3.7916	0.0989	0.152
C05G6.t1|C05G6.t1	0	0	NaN	NA	NA
C05H8.3|C05H8.3	1.36	3.87	2.84995	0.431	0.579
C05H8.4|C05H8.4	1.16	0.567	0.49079	1	1
C06A1.10|C06A1.10	0	0	NaN	NA	NA
C06A1.11|C06A1.11	0	0	NaN	NA	NA
C06A1.2|C06A1.2|C06A1.2	566	824	1.45528	3.38e-10	9.23e-10
C06A1.3|C06A1.3|C06A1.3	278	263	0.94823	0.784	0.945
C06A1.4|C06A1.4	489	653	1.3344	1.54e-43	9.82e-43
C06A1.6|C06A1.6|C06A1.6	33.6	227	6.76533	1.11e-50	8.09e-50
C06A1.7|C06A1.7|C06A1.7	35	194	5.53885	1.17e-35	6.42e-35
C06A1.8|C06A1.8	1.25	1.76	1.41275	0.557	0.722
C06A1.9|C06A1.9	1.26	0.869	0.69134	0.915	1
C06A12.17|C06A12.17	0	0	NaN	NA	NA
C06A12.18|C06A12.18	0	0	NaN	NA	NA
C06A12.3|C06A12.3|C06A12.3a	387	306	0.7907	1.65e-33	8.67e-33
C06A12.3|C06A12.3|C06A12.3b	643	480	0.74701	1.72e-72	1.74e-71
C06A12.3|C06A12.3|C06A12.3c	201	151	0.75013	1.11e-30	5.49e-30
C06A12.8|C06A12.8|C06A12.8	0.45	0	0	1	1
C06A5.10|C06A5.10|C06A5.10	65.9	116	1.76758	0.096	0.148
C06A5.12|C06A5.12|C06A5.12	124	338	2.73708	0.00327	0.00597
C06A5.1|C06A5.1|C06A5.1	952	1270	1.33628	4.08e-122	7.79e-121
C06A5.2|C06A5.2|C06A5.2	114	71.5	0.62871	6.2e-10	1.67e-09
C06A5.3|C06A5.3|C06A5.3a	1110	1420	1.28175	2.38e-85	2.87e-84
C06A5.3|C06A5.3|C06A5.3b	513	643	1.25374	1.44e-41	8.87e-41
C06A5.4|C06A5.4|C06A5.4	151	213	1.40715	1.67e-12	5e-12
C06A5.5|C06A5.5|C06A5.5	117	389	3.31664	7.35e-22	2.92e-21
C06A5.6|C06A5.6|C06A5.6	1090	1400	1.28232	1.35e-109	2.22e-108
C06A5.8|C06A5.8|C06A5.8a	101	103	1.02041	0.00369	0.00671
C06A5.8|C06A5.8|C06A5.8b	176	173	0.9855	0.00148	0.00279
C06A6.10|C06A6.10	0	0	NaN	NA	NA
C06A6.11|C06A6.11	0	0	NaN	NA	NA
C06A6.12|C06A6.12	0.131	0.589	4.50304	0.735	0.904
C06A6.13|C06A6.13	0	0.447	Inf	0.761	0.929
C06A6.14|C06A6.14	0	0	NaN	NA	NA
C06A6.2|C06A6.2|C06A6.2a	404	544	1.3479	1.91e-55	1.49e-54
C06A6.2|C06A6.2|C06A6.2b	411	549	1.33575	2.88e-54	2.22e-53
C06A6.4|C06A6.4|C06A6.4a	2190	2060	0.93776	0.00644	0.0115
C06A6.4|C06A6.4|C06A6.4b	1120	1050	0.93686	0.0227	0.038
C06A6.5|C06A6.5|C06A6.5	1930	1370	0.70853	7.82e-177	2.63e-175
C06A6.7|C06A6.7|C06A6.7	117	64	0.54651	7.25e-17	2.51e-16
C06A6.9|C06A6.9	0.265	0	0	1	1
C06A8.13|C06A8.13	0	0	NaN	NA	NA
C06A8.14|C06A8.14	0	0	NaN	NA	NA
C06A8.15|C06A8.15	0.131	0	0	1	1
C06A8.16|C06A8.16	1.54	1.04	0.67106	0.84	0.952
C06A8.17|C06A8.17	0	0	NaN	NA	NA
C06A8.1|C06A8.1|C06A8.1a	6200	6410	1.03412	1.21e-37	6.9e-37
C06A8.1|C06A8.1|C06A8.1b	3370	3510	1.04226	3.38e-22	1.36e-21
C06A8.2|C06A8.2|C06A8.2	468	475	1.01497	0.127	0.192
C06A8.3|C06A8.3|C06A8.3	5000	4220	0.84382	0	0
C06A8.6|C06A8.6|C06A8.6	523	310	0.59215	3.07e-42	1.92e-41
C06A8.8|C06A8.8|C06A8.8a	429	621	1.44733	3.68e-11	1.05e-10
C06A8.8|C06A8.8|C06A8.8b	920	1540	1.67726	1.29e-07	3.14e-07
C06B3.16|C06B3.16|C06B3.16	21	12.2	0.58036	0.000209	0.000421
C06B3.1|C06B3.1|C06B3.1	0	1	Inf	0.649	0.82
C06B3.6|C06B3.6|C06B3.6	1010	1940	1.91498	1.63e-101	2.42e-100
C06B3.7|C06B3.7|C06B3.7	252	204	0.80906	1.08e-32	5.56e-32
C06B8.11|C06B8.11|C06B8.11	0	0	NaN	NA	NA
C06B8.13|C06B8.13	0	0	NaN	NA	NA
C06B8.14|C06B8.14	0	0	NaN	NA	NA
C06B8.15|C06B8.15	1.4	8.36	5.98335	0.003	0.0055
C06B8.2|C06B8.2|C06B8.2a	193	239	1.2366	1.36e-15	4.53e-15
C06B8.2|C06B8.2|C06B8.2b	434	542	1.24923	4.04e-33	2.1e-32
C06B8.2|C06B8.2|C06B8.2c	225	292	1.30096	5.08e-20	1.92e-19
C06B8.2|C06B8.2|C06B8.2d	233	307	1.31666	4.37e-20	1.66e-19
C06B8.3|C06B8.3|C06B8.3	0.701	5.48	7.82446	0.0213	0.0358
C06B8.7|C06B8.7|C06B8.7	613	838	1.36736	4.63e-94	6.26e-93
C06B8.t1|C06B8.t1	0	0	NaN	NA	NA
C06B8.t2|C06B8.t2	0	0	NaN	NA	NA
C06B8.t3|C06B8.t3	0	1.31	Inf	0.387	0.527
C06C3.10|C06C3.10|C06C3.10	173	896	5.16887	0	0
C06C3.11|C06C3.11	137	315	2.2958	0.0103	0.0178
C06C3.12|C06C3.12|C06C3.12	55.3	48.5	0.87578	0.0114	0.0197
C06C3.13|C06C3.13	0	0	NaN	NA	NA
C06C3.3|C06C3.3|C06C3.3	45.9	80.4	1.75234	8.87e-05	0.000184
C06C3.4|C06C3.4|C06C3.4	462	1140	2.47825	1.17e-07	2.87e-07
C06C3.5|C06C3.5	35.4	169	4.76562	7.76e-22	3.08e-21
C06C3.7|C06C3.7|C06C3.7	16.5	20.9	1.26701	0.267	0.378
C06C3.8|C06C3.8|C06C3.8	38.4	59.5	1.54746	1.37e-05	2.99e-05
C06C3.9|C06C3.9|C06C3.9	185	415	2.24654	0.0743	0.116
C06C6.10|C06C6.10	0.523	0	0	1	1
C06C6.1|C06C6.1|C06C6.1	0.265	0	0	1	1
C06C6.6|C06C6.6|C06C6.6	30.8	40.6	1.31623	0.00015	0.000306
C06C6.7|C06C6.7|C06C6.7	86.6	106	1.22624	1.09e-06	2.53e-06
C06C6.8|C06C6.8|C06C6.8	27.7	30.7	1.10554	1	1
C06C6.9|C06C6.9|C06C6.9	3.9	3.11	0.798	0.797	0.945
C06E1.11|C06E1.11|C06E1.11	46.6	89.5	1.92159	0.367	0.503
C06E1.12|C06E1.12	0	0	NaN	NA	NA
C06E1.13|C06E1.13	0	0	NaN	NA	NA
C06E1.14|C06E1.14	0	0	NaN	NA	NA
C06E1.15|C06E1.15	0	0	NaN	NA	NA
C06E1.1|C06E1.1|C06E1.1	93.3	75.3	0.80646	0.000451	0.000885
C06E1.3|C06E1.3|C06E1.3	459	294	0.64035	0.0124	0.0214
C06E1.7|C06E1.7|C06E1.7	148	157	1.05652	1.38e-10	3.84e-10
C06E1.9|C06E1.9|C06E1.9	534	634	1.18625	2.18e-22	8.79e-22
C06E2.11|C06E2.11	40.1	66.8	1.66535	7.19e-16	2.42e-15
C06E2.12|C06E2.12	0	0	NaN	NA	NA
C06E2.13|C06E2.13	0	0	NaN	NA	NA
C06E2.14|C06E2.14	0	0	NaN	NA	NA
C06E2.1|C06E2.1|C06E2.1	320	371	1.15856	4.33e-10	1.18e-09
C06E2.2|C06E2.2|C06E2.2	2.07	7.99	3.86249	0.29	0.408
C06E2.5|C06E2.5|C06E2.5	272	186	0.68441	2.78e-67	2.59e-66
C06E2.9|C06E2.9|C06E2.9	0.633	4.56	7.20925	0.294	0.413
C06E4.15|C06E4.15	0.396	0	0	1	1
C06E4.16|C06E4.16	0.265	0	0	1	1
C06E4.17|C06E4.17	0	0	NaN	NA	NA
C06E4.18|C06E4.18	0	0	NaN	NA	NA
C06E4.19|C06E4.19	0	0	NaN	NA	NA
C06E4.1|C06E4.1|C06E4.1	0	0.98	Inf	0.573	0.741
C06E4.20|C06E4.20	0	2.1	Inf	0.191	0.278
C06E4.21|C06E4.21	0	0	NaN	NA	NA
C06E4.2|C06E4.2|C06E4.2	132	198	1.50287	0.0029	0.00533
C06E4.3|C06E4.3|C06E4.3	106	54.2	0.51305	4.75e-33	2.47e-32
C06E4.4|C06E4.4|C06E4.4	0.492	0.164	0.33261	1	1
C06E4.5|C06E4.5|C06E4.5	0.131	0.794	6.06745	0.83	0.945
C06E4.6|C06E4.6|C06E4.6	11.2	8.9	0.79616	0.539	0.702
C06E4.8|C06E4.8|C06E4.8	58.5	210	3.59526	1.4e-06	3.23e-06
C06E4.t1|C06E4.t1	0	0.142	Inf	0.825	0.945
C06E7.2|C06E7.2|C06E7.2	1190	796	0.66713	8.27e-86	1e-84
C06E7.4|C06E7.4|C06E7.4	460	647	1.40752	2.87e-56	2.26e-55
C06E7.88|C06E7.88|C06E7.88	33.3	52.6	1.57814	0.11	0.168
C06E7.89|C06E7.89	0	0	NaN	NA	NA
C06E7.90|C06E7.90	0	0	NaN	NA	NA
C06E7.91|C06E7.91	0	0	NaN	NA	NA
C06E7.92|C06E7.92	0	0	NaN	NA	NA
C06E7.93|C06E7.93	0	0.706	Inf	0.726	0.894
C06E7.94|C06E7.94	0	0	NaN	NA	NA
C06E8.5|C06E8.5|C06E8.5	437	287	0.65589	0.000708	0.00137
C06E8.6|C06E8.6	0	0.284	Inf	0.808	0.945
C06E8.7|C06E8.7	0	0	NaN	NA	NA
C06G1.10|C06G1.10	6.57	10	1.52498	0.0022	0.00408
C06G1.11|C06G1.11	0.56	16.9	30.2528	1.4e-07	3.42e-07
C06G1.12|C06G1.12	0.12	0.284	2.35415	0.83	0.945
C06G1.13|C06G1.13	0	0	NaN	NA	NA
C06G1.14|C06G1.14	0	0	NaN	NA	NA
C06G1.15|C06G1.15	0.56	16.9	30.2528	1.4e-07	3.42e-07
C06G1.16|C06G1.16	0	0.517	Inf	0.769	0.935
C06G1.17|C06G1.17	0.131	0.284	2.16773	0.83	0.945
C06G1.1|C06G1.1|C06G1.1a	681	937	1.37634	1.38e-75	1.45e-74
C06G1.1|C06G1.1|C06G1.1b	803	1140	1.4248	2.91e-87	3.59e-86
C06G1.2|C06G1.2|C06G1.2	178	331	1.86029	1.01e-31	5.12e-31
C06G1.5|C06G1.5|C06G1.5	796	918	1.15391	5.89e-25	2.54e-24
C06G1.6|C06G1.6|C06G1.6	433	574	1.3249	1.8e-45	1.18e-44
C06G1.7|C06G1.7	0	0	NaN	NA	NA
C06G1.8|C06G1.8	0.262	0	0	1	1
C06G1.9|C06G1.9	0	0	NaN	NA	NA
C06G1.t1|C06G1.t1	0	1.15	Inf	0.512	0.672
C06G1.t2|C06G1.t2	0.241	8.33	34.5515	0.00017	0.000344
C06G1.t3|C06G1.t3	0.241	8.33	34.5515	0.00017	0.000344
C06G1.t4|C06G1.t4	0	0.353	Inf	0.826	0.945
C06G3.3|C06G3.3|C06G3.3	9.33	48.1	5.1533	1.69e-07	4.1e-07
C06G3.4|C06G3.4|C06G3.4	1.85	1.89	1.02103	0.854	0.961
C06G3.5|C06G3.5|C06G3.5a	1430	1410	0.98762	0.0226	0.0378
C06G3.5|C06G3.5|C06G3.5b	2570	2520	0.97936	0.0106	0.0183
C06G3.6|C06G3.6|C06G3.6	618	538	0.87102	7.48e-06	1.66e-05
C06G3.8|C06G3.8|C06G3.8	565	1210	2.13676	0.25	0.356
C06G3.9|C06G3.9|C06G3.9	2040	2590	1.27149	3.36e-135	7.4e-134
C06G4.1|C06G4.1|C06G4.1	381	543	1.42522	1.24e-27	5.76e-27
C06G4.4|C06G4.4|C06G4.4	217	133	0.6143	4.99e-26	2.22e-25
C06G4.6|C06G4.6|C06G4.6	142	148	1.04434	2.25e-07	5.43e-07
C06G4.7|C06G4.7	1.3	1.57	1.2103	0.695	0.865
C06G4.t1|C06G4.t1	1.3	1.57	1.2103	0.695	0.865
C06G8.1|C06G8.1|C06G8.1	966	823	0.85177	0.0333	0.0547
C06G8.3|C06G8.3	529	475	0.89753	0.215	0.31
C06G8.3|C06G8.3|C06G8.3b	554	493	0.88919	0.0655	0.103
C06G8.3|C06G8.3|C06G8.3c	583	520	0.89295	0.0183	0.0311
C06H2.10|C06H2.10	0	0.353	Inf	0.826	0.945
C06H2.2|C06H2.2|C06H2.2	1260	875	0.69692	1.99e-128	4.06e-127
C06H2.3|C06H2.3|C06H2.3	1660	3670	2.21692	NaN	NaN
C06H2.6|C06H2.6|C06H2.6	1410	1340	0.94398	3.82e-81	4.33e-80
C06H2.7|C06H2.7|C06H2.7	246	93.3	0.37897	3.1e-88	3.86e-87
C06H2.9|C06H2.9	0	0	NaN	NA	NA
C06H5.6|C06H5.6|C06H5.6	899	851	0.94631	0.211	0.305
C06H5.7|C06H5.7|C06H5.7	1700	1590	0.93602	0.00122	0.00232
C06H5.8|C06H5.8|C06H5.8	144	173	1.2033	0.00708	0.0125
C06H5.9|C06H5.9	0.199	0.164	0.82429	0.868	0.972
C07A12.10|C07A12.10	0	0	NaN	NA	NA
C07A12.11|C07A12.11	0.12	0.652	5.41216	0.961	1
C07A12.12|C07A12.12	0	0	NaN	NA	NA
C07A12.13|C07A12.13	0	0	NaN	NA	NA
C07A12.14|C07A12.14	0	0	NaN	NA	NA
C07A12.15|C07A12.15	0	0.353	Inf	0.826	0.945
C07A12.16|C07A12.16	0	0	NaN	NA	NA
C07A12.17|C07A12.17	0.265	0.353	1.32969	0.93	1
C07A12.2|C07A12.2|C07A12.2	52.1	32.1	0.61662	8.36e-09	2.15e-08
C07A12.7|C07A12.7|C07A12.7a	1630	1600	0.97955	0.0315	0.0518
C07A12.7|C07A12.7|C07A12.7b	687	671	0.97687	0.109	0.166
C07A12.7|C07A12.7|C07A12.7c	1040	1010	0.97017	0.265	0.376
C07A12.9|C07A12.9	0	0	NaN	NA	NA
C07A4.2|C07A4.2|C07A4.2	42.2	66.4	1.57499	4.66e-08	1.16e-07
C07A4.3|C07A4.3|C07A4.3	31	20.9	0.67383	0.00211	0.00393
C07A4.4|C07A4.4	0.627	1.06	1.68858	1	1
C07A4.5|C07A4.5	0	0	NaN	NA	NA
C07A4.6|C07A4.6	0	0	NaN	NA	NA
C07A4.7|C07A4.7	0.651	0.353	0.54182	1	1
C07A4.8|C07A4.8	0	0	NaN	NA	NA
C07A4.9|C07A4.9	0.12	0	0	1	1
C07A9.10|C07A9.10|C07A9.10	0.382	0	0	1	1
C07A9.12|C07A9.12|C07A9.12	285	197	0.68856	2.65e-49	1.88e-48
C07A9.13|C07A9.13|C07A9.13	52.2	57.5	1.10108	0.0708	0.111
C07A9.14|C07A9.14	0.12	1.3	10.8243	0.82	0.945
C07A9.15|C07A9.15	0	0	NaN	NA	NA
C07A9.16|C07A9.16	0.44	1.27	2.89532	0.595	0.763
C07A9.2|C07A9.2|C07A9.2	1070	838	0.7812	7.69e-80	8.6e-79
C07A9.5|C07A9.5|C07A9.5	11.6	15.3	1.31716	0.0576	0.0915
C07A9.8|C07A9.8|C07A9.8	172	133	0.77352	6.19e-23	2.53e-22
C07A9.9|C07A9.9|C07A9.9	346	242	0.69865	1.65e-13	5.13e-13
C07B5.2|C07B5.2|C07B5.2	91.1	108	1.18828	1.2e-18	4.37e-18
C07B5.3|C07B5.3|C07B5.3	102	169	1.64987	0.0159	0.0272
C07B5.4|C07B5.4|C07B5.4a	467	634	1.35863	1.2e-45	7.93e-45
C07B5.4|C07B5.4|C07B5.4b	331	393	1.18759	3.68e-30	1.8e-29
C07B5.6|C07B5.6|C07B5.6	58	113	1.95287	0.0769	0.12
C07B5.8|C07B5.8|C07B5.8	27.3	236	8.64117	2.52e-59	2.08e-58
C07B5.9|C07B5.9	0.393	0	0	1	1
C07C7.1|C07C7.1|C07C7.1	54	85.6	1.58428	0.0144	0.0247
C07D10.1|C07D10.1|C07D10.1	153	124	0.80892	1.76e-14	5.63e-14
C07D10.5|C07D10.5|C07D10.5	250	316	1.26493	3.04e-11	8.66e-11
C07D10.6|C07D10.6|C07D10.6	6.08	26.5	4.36627	0.0155	0.0264
C07D8.2|C07D8.2	10.7	26	2.44055	0.157	0.233
C07D8.5|C07D8.5|C07D8.5	2.74	4.14	1.51003	0.0736	0.115
C07D8.6|C07D8.6|C07D8.6	2860	2620	0.9173	1.42e-117	2.56e-116
C07E3.10|C07E3.10|C07E3.10	183	1140	6.22772	NaN	NaN
C07E3.13|C07E3.13	0	0	NaN	NA	NA
C07E3.14|C07E3.14	0	0	NaN	NA	NA
C07E3.15|C07E3.15	0	0.142	Inf	0.825	0.945
C07E3.16|C07E3.16	0	0	NaN	NA	NA
C07E3.3|C07E3.3|C07E3.3	530	591	1.11653	5.85e-12	1.72e-11
C07E3.4|C07E3.4|C07E3.4	194	263	1.35162	3.63e-35	1.98e-34
C07E3.6|C07E3.6|C07E3.6	153	151	0.99272	0.201	0.293
C07E3.8|C07E3.8|C07E3.8	11.1	11.6	1.04505	0.233	0.334
C07E3.9|C07E3.9|C07E3.9	298	659	2.21358	1.07e-05	2.35e-05
C07F11.2|C07F11.2|C07F11.2	63.2	67.5	1.068	0.272	0.386
C07G1.10|C07G1.10	0	0	NaN	NA	NA
C07G1.11|C07G1.11	0	0	NaN	NA	NA
C07G1.12|C07G1.12	0.527	0	0	1	1
C07G1.13|C07G1.13	0	0	NaN	NA	NA
C07G1.14|C07G1.14	0.832	0.589	0.70804	1	1
C07G1.2|C07G1.2|C07G1.2	155	194	1.25023	8.67e-11	2.43e-10
C07G1.6|C07G1.6|C07G1.6	179	98.8	0.55241	7.25e-25	3.13e-24
C07G1.7|C07G1.7|C07G1.7	8	20.1	2.51417	2.13e-09	5.64e-09
C07G2.4|C07G2.4	0.199	0.353	1.77588	0.909	1
C07G3.10|C07G3.10|C07G3.10	4.23	3.77	0.88985	0.482	0.638
C07G3.13|C07G3.13	0.261	0.142	0.54266	0.879	0.981
C07G3.8|C07G3.8|C07G3.8	23.2	24.8	1.07019	0.0137	0.0235
C07H4.1|C07H4.1|C07H4.1	306	858	2.80426	7.29e-17	2.52e-16
C07H4.3|C07H4.3	0	0	NaN	NA	NA
C07H4.4|C07H4.4	0	0	NaN	NA	NA
C07H6.10|C07H6.10	0.661	0	0	0.96	1
C07H6.11|C07H6.11	0	0	NaN	NA	NA
C07H6.12|C07H6.12	0	0.652	Inf	0.827	0.945
C07H6.13|C07H6.13	0	0	NaN	NA	NA
C07H6.14|C07H6.14	0	0	NaN	NA	NA
C07H6.15|C07H6.15	0	0	NaN	NA	NA
C07H6.16|C07H6.16	0	0.652	Inf	0.827	0.945
C07H6.17|C07H6.17	0	0	NaN	NA	NA
C07H6.18|C07H6.18	0	0.142	Inf	0.825	0.945
C07H6.2|C07H6.2|C07H6.2	459	880	1.91773	0.338	0.468
C07H6.4|C07H6.4|C07H6.4	972	1280	1.32171	9.98e-108	1.6e-106
C07H6.9|C07H6.9|C07H6.9	57.4	281	4.89417	7.13e-26	3.16e-25
C08A9.10|C08A9.10|C08A9.10	5.87	1.31	0.22299	4.88e-05	0.000103
C08A9.11|C08A9.11	22	24.4	1.10674	0.000749	0.00144
C08A9.12|C08A9.12	0.638	0	0	0.925	1
C08A9.2|C08A9.2	1.37	2.87	2.09656	0.0386	0.0629
C08A9.3|C08A9.3|C08A9.3a	10.7	11.2	1.04812	0.826	0.945
C08A9.3|C08A9.3|C08A9.3b	5.79	7.61	1.3129	0.256	0.364
C08A9.6|C08A9.6|C08A9.6	79.6	91.9	1.15479	0.0404	0.0656
C08A9.8|C08A9.8|C08A9.8	10.1	10.8	1.0741	0.342	0.473
C08A9.9|C08A9.9|C08A9.9	2.35	8.65	3.68261	0.00399	0.00724
C08B11.11|C08B11.11	0.131	0	0	1	1
C08B11.12|C08B11.12	0	0.652	Inf	0.827	0.945
C08B11.13|C08B11.13	0	0	NaN	NA	NA
C08B11.3|C08B11.3|C08B11.3	2220	2840	1.27912	4.26e-185	1.56e-183
C08B11.6|C08B11.6|C08B11.6	1010	864	0.85384	3.22e-10	8.82e-10
C08B11.8|C08B11.8|C08B11.8	576	560	0.97161	0.738	0.906
C08B11.9|C08B11.9|C08B11.9	588	611	1.03893	1.69e-08	4.28e-08
C08B6.10|C08B6.10|C08B6.10	432	301	0.69567	1.64e-49	1.17e-48
C08B6.11|C08B6.11|C08B6.11	552	827	1.49763	5.14e-11	1.45e-10
C08B6.14|C08B6.14|C08B6.14	1.42	1.1	0.77217	0.601	0.77
C08B6.15|C08B6.15	5.39	8.03	1.48913	0.863	0.968
C08B6.16|C08B6.16	0.846	0.652	0.77098	0.836	0.949
C08B6.17|C08B6.17	9.79	26.2	2.67159	2.01e-05	4.35e-05
C08B6.2|C08B6.2|C08B6.2a	61.6	72.1	1.17085	1.53e-06	3.53e-06
C08B6.2|C08B6.2|C08B6.2b	57.5	64.3	1.11893	1.31e-06	3.03e-06
C08B6.2|C08B6.2|C08B6.2c	63	72.8	1.15594	1.44e-06	3.33e-06
C08B6.3|C08B6.3|C08B6.3	801	725	0.90557	5.67e-11	1.6e-10
C08B6.4|C08B6.4|C08B6.4a	129	251	1.94869	8.56e-35	4.62e-34
C08B6.4|C08B6.4|C08B6.4b	141	274	1.94559	7.92e-38	4.55e-37
C08B6.5|C08B6.5|C08B6.5	10.2	5.99	0.58594	0.00105	0.00199
C08B6.6|C08B6.6|C08B6.6	25.4	14	0.55262	1.89e-05	4.08e-05
C08B6.7|C08B6.7|C08B6.7a	2160	2440	1.13139	4.6e-78	5.02e-77
C08B6.7|C08B6.7|C08B6.7b	1210	1370	1.13577	6.91e-39	4.05e-38
C08B6.8|C08B6.8|C08B6.8	807	968	1.19956	3.1e-33	1.62e-32
C08C3.10|C08C3.10	0	0	NaN	NA	NA
C08C3.11|C08C3.11	0	0	NaN	NA	NA
C08C3.4|C08C3.4|C08C3.4a	785	613	0.78161	6.56e-18	2.35e-17
C08C3.4|C08C3.4|C08C3.4b	670	508	0.75807	9.62e-19	3.52e-18
C08C3.6|C08C3.6	0	0	NaN	NA	NA
C08C3.7|C08C3.7	0	0	NaN	NA	NA
C08C3.8|C08C3.8	0	0	NaN	NA	NA
C08C3.9|C08C3.9	0	0	NaN	NA	NA
C08D8.1|C08D8.1|C08D8.1	82.6	51.5	0.62331	8.65e-24	3.62e-23
C08D8.3|C08D8.3	0.45	4.71	10.4591	0.0977	0.15
C08D8.4|C08D8.4	0	0	NaN	NA	NA
C08D8.5|C08D8.5	0.392	0	0	1	1
C08D8.6|C08D8.6	3.04	1.62	0.53151	0.053	0.0846
C08E3.13|C08E3.13|C08E3.13	693	1310	1.88295	NaN	NaN
C08E3.14|C08E3.14|C08E3.14	0	0	NaN	NA	NA
C08E3.15|C08E3.15|C08E3.15	1.82	2.1	1.14969	0.71	0.879
C08E3.1|C08E3.1|C08E3.1	255	511	2.00666	0.292	0.411
C08E8.10|C08E8.10|C08E8.10	63.8	98.7	1.54741	0.00746	0.0132
C08E8.11|C08E8.11|C08E8.11	0.12	0	0	1	1
C08E8.12|C08E8.12	0	0	NaN	NA	NA
C08E8.13|C08E8.13	0	0	NaN	NA	NA
C08E8.14|C08E8.14	0	0	NaN	NA	NA
C08E8.15|C08E8.15	0	0	NaN	NA	NA
C08E8.1|C08E8.1|C08E8.1	76.3	104	1.36187	0.0122	0.021
C08E8.2|C08E8.2|C08E8.2	0.12	2.8	23.2696	0.126	0.19
C08E8.3|C08E8.3|C08E8.3	36	130	3.60036	1.83e-06	4.21e-06
C08E8.4|C08E8.4|C08E8.4	196	457	2.33824	5.68e-19	2.1e-18
C08E8.5|C08E8.5|C08E8.5	2.88	99.9	34.7083	7.43e-43	4.68e-42
C08E8.6|C08E8.6|C08E8.6	7.68	82.1	10.6991	1.17e-22	4.75e-22
C08E8.7|C08E8.7	3.12	2.67	0.85421	0.296	0.416
C08E8.8|C08E8.8	0	0	NaN	NA	NA
C08E8.9|C08E8.9|C08E8.9	7.68	84.4	10.9999	1.05e-23	4.36e-23
C08E8.t1|C08E8.t1	0	0	NaN	NA	NA
C08E8.t2|C08E8.t2	0	0	NaN	NA	NA
C08E8.t3|C08E8.t3	0	0.353	Inf	0.826	0.945
C08F1.10|C08F1.10|C08F1.10	2.1	10.3	4.89606	0.000136	0.000278
C08F1.11|C08F1.11|C08F1.11	4.43	5.14	1.16102	1	1
C08F1.6|C08F1.6|C08F1.6	1.18	5.03	4.25627	0.00263	0.00486
C08F1.8|C08F1.8|C08F1.8	20.7	17.8	0.86051	0.182	0.267
C08F11.10|C08F11.10|C08F11.10	199	146	0.73369	7.04e-06	1.57e-05
C08F11.116|C08F11.116	3.57	12.1	3.3837	0.534	0.697
C08F11.11|C08F11.11|C08F11.11	292	201	0.68783	5.2e-28	2.43e-27
C08F11.12|C08F11.12|C08F11.12	0.523	0.327	0.62656	0.929	1
C08F11.13|C08F11.13|C08F11.13	1960	1780	0.90813	1.26e-96	1.76e-95
C08F11.14|C08F11.14	141	217	1.53415	2.57e-39	1.52e-38
C08F11.16|C08F11.16	0.251	1.3	5.18904	1	1
C08F11.17|C08F11.17|C08F11.17	0	0	NaN	NA	NA
C08F11.18|C08F11.18	0	0	NaN	NA	NA
C08F11.19|C08F11.19	0	0	NaN	NA	NA
C08F11.1|C08F11.1|C08F11.1	419	321	0.76582	1.25e-65	1.14e-64
C08F11.2|C08F11.2|C08F11.2	0.57	2.64	4.62169	0.528	0.69
C08F11.3|C08F11.3|C08F11.3	93	214	2.30575	0.00876	0.0153
C08F11.6|C08F11.6	39.2	132	3.37048	1.67e-08	4.24e-08
C08F11.7|C08F11.7|C08F11.7	58.1	199	3.4222	6.78e-33	3.51e-32
C08F8.10|C08F8.10	0	0	NaN	NA	NA
C08F8.11|C08F8.11	0	0	NaN	NA	NA
C08F8.12|C08F8.12	0	0	NaN	NA	NA
C08F8.13|C08F8.13	0	0	NaN	NA	NA
C08F8.14|C08F8.14	0	0.652	Inf	0.827	0.945
C08F8.2|C08F8.2|C08F8.2a	797	937	1.17666	3.01e-29	1.45e-28
C08F8.2|C08F8.2|C08F8.2b	753	871	1.15595	2.85e-27	1.31e-26
C08F8.3|C08F8.3|C08F8.3	294	271	0.92369	0.167	0.246
C08F8.6|C08F8.6|C08F8.6	181	201	1.11174	1.06e-06	2.47e-06
C08F8.9|C08F8.9|C08F8.9	415	520	1.25421	0.000872	0.00167
C08G5.1|C08G5.1|C08G5.1	11.5	14.6	1.26497	0.13	0.196
C08G5.3|C08G5.3|C08G5.3	44	49.7	1.13034	0.013	0.0223
C08G5.5|C08G5.5|C08G5.5	248	271	1.09246	0.172	0.253
C08G5.6|C08G5.6|C08G5.6	63.2	72.1	1.13957	2.5e-05	5.37e-05
C08G5.7|C08G5.7|C08G5.7a	32.6	35	1.07335	0.147	0.218
C08G5.7|C08G5.7|C08G5.7b	31.7	34.4	1.08496	0.159	0.235
C08G5.9|C08G5.9	0	0	NaN	NA	NA
C08G9.10|C08G9.10	0	0	NaN	NA	NA
C08G9.1|C08G9.1|C08G9.1	733	1010	1.37542	5.25e-05	0.000111
C08G9.2|C08G9.2|C08G9.2	260	452	1.73948	4.43e-49	3.14e-48
C08G9.4|C08G9.4	0.396	0	0	1	1
C08G9.5|C08G9.5	0	0.658	Inf	0.694	0.865
C08G9.6|C08G9.6	1.77	2.57	1.45178	0.204	0.296
C08G9.7|C08G9.7	0.396	0	0	1	1
C08G9.8|C08G9.8	0.241	0	0	1	1
C08G9.9|C08G9.9	0	0	NaN	NA	NA
C08H9.10|C08H9.10|C08H9.10	40.7	11.9	0.29289	1.31e-21	5.18e-21
C08H9.11|C08H9.11|C08H9.11	37.3	21.5	0.57502	6.59e-07	1.55e-06
C08H9.12|C08H9.12|C08H9.12	74.3	24.6	0.33056	1.03e-38	6.01e-38
C08H9.13|C08H9.13|C08H9.13	7.58	9.91	1.30665	0.795	0.945
C08H9.14|C08H9.14|C08H9.14	16.9	11.6	0.69015	0.101	0.154
C08H9.15|C08H9.15|C08H9.15	552	520	0.94216	5.09e-45	3.32e-44
C08H9.16|C08H9.16|C08H9.16	232	220	0.94756	0.276	0.39
C08H9.1|C08H9.1|C08H9.1	97.4	70.6	0.72549	0.671	0.843
C08H9.2|C08H9.2|C08H9.2a	7820	8230	1.05154	1.37e-86	1.67e-85
C08H9.2|C08H9.2|C08H9.2b	12900	13300	1.03484	2.32e-98	3.31e-97
C08H9.3|C08H9.3|C08H9.3a	497	530	1.06798	4.32e-10	1.17e-09
C08H9.3|C08H9.3|C08H9.3b	194	208	1.0741	6.3e-08	1.56e-07
C08H9.4|C08H9.4|C08H9.4a	28.3	26.5	0.93605	0.628	0.799
C08H9.4|C08H9.4|C08H9.4b	31	24.9	0.80526	0.227	0.326
C08H9.6|C08H9.6|C08H9.6	9.33	7.03	0.75364	0.0113	0.0196
C08H9.7|C08H9.7|C08H9.7	18.3	22.1	1.21284	0.0177	0.03
C08H9.8|C08H9.8	1.76	0.816	0.46296	0.399	0.541
C08H9.9|C08H9.9	26.1	21.2	0.81184	0.0287	0.0474
C09B7.10|C09B7.10	0	0	NaN	NA	NA
C09B7.11|C09B7.11	0	0	NaN	NA	NA
C09B7.12|C09B7.12	0	0	NaN	NA	NA
C09B7.2|C09B7.2|C09B7.2	844	1050	1.24625	1.3e-33	6.86e-33
C09B7.3|C09B7.3	0	0	NaN	NA	NA
C09B7.4|C09B7.4	0.265	0.142	0.53454	0.88	0.981
C09B7.5|C09B7.5	0	0	NaN	NA	NA
C09B7.6|C09B7.6	0.923	2.08	2.25573	0.706	0.875
C09B7.7|C09B7.7	0	0	NaN	NA	NA
C09B7.8|C09B7.8	1.3	2.75	2.1202	0.108	0.165
C09B7.9|C09B7.9	0.131	0	0	1	1
C09B8.10|C09B8.10	0	0	NaN	NA	NA
C09B8.11|C09B8.11	0	0	NaN	NA	NA
C09B8.12|C09B8.12	0.329	0.8	2.42845	0.742	0.91
C09B8.13|C09B8.13	0	0	NaN	NA	NA
C09B8.14|C09B8.14	0	0	NaN	NA	NA
C09B8.15|C09B8.15	0	0.353	Inf	0.826	0.945
C09B8.16|C09B8.16	0	0.353	Inf	0.826	0.945
C09B8.17|C09B8.17	0.12	0.142	1.17708	0.848	0.958
C09B8.18|C09B8.18	0.265	0.658	2.48141	0.736	0.904
C09B8.3|C09B8.3|C09B8.3	189	179	0.94902	8.01e-07	1.88e-06
C09B8.4|C09B8.4|C09B8.4	537	351	0.65421	6.86e-117	1.24e-115
C09B8.5|C09B8.5|C09B8.5	20.7	31.2	1.50443	0.192	0.28
C09B8.8|C09B8.8|C09B8.8	69.9	76.9	1.09883	0.000114	0.000234
C09B9.1|C09B9.1|C09B9.1	71.5	78	1.09043	2.47e-08	6.21e-08
C09B9.2|C09B9.2|C09B9.2	195	204	1.04668	1.48e-05	3.22e-05
C09B9.3|C09B9.3|C09B9.3a	161	168	1.04627	4.78e-06	1.07e-05
C09B9.3|C09B9.3|C09B9.3b	236	143	0.60409	4.74e-18	1.7e-17
C09B9.4|C09B9.4|C09B9.4	178	187	1.05225	3.71e-05	7.88e-05
C09B9.7|C09B9.7|C09B9.7	165	254	1.54592	3.71e-46	2.47e-45
C09B9.80|C09B9.80	0.464	0	0	1	1
C09B9.81|C09B9.81	0	0.142	Inf	0.825	0.945
C09B9.82|C09B9.82	0	0.142	Inf	0.825	0.945
C09B9.83|C09B9.83	0	0	NaN	NA	NA
C09B9.84|C09B9.84	0	0	NaN	NA	NA
C09B9.8|C09B9.8|C09B9.8	163	200	1.22333	0.929	1
C09B9.t1|C09B9.t1	0	0	NaN	NA	NA
C09C7.2|C09C7.2	0	0	NaN	NA	NA
C09D1.4|C09D1.4	0	0	NaN	NA	NA
C09D1.5|C09D1.5	0	0	NaN	NA	NA
C09D4.1|C09D4.1|C09D4.1a	1500	1560	1.03348	1.22e-36	6.8e-36
C09D4.1|C09D4.1|C09D4.1b	1270	1040	0.81779	4.91e-18	1.76e-17
C09D4.2|C09D4.2|C09D4.2	461	302	0.65578	2.22e-55	1.73e-54
C09D4.3|C09D4.3|C09D4.3	430	343	0.79838	0.000641	0.00124
C09D4.4|C09D4.4|C09D4.4a	811	1050	1.29591	4.35e-92	5.74e-91
C09D4.4|C09D4.4|C09D4.4b	801	1040	1.29714	1.76e-91	2.31e-90
C09D4.4|C09D4.4|C09D4.4c	902	1160	1.28529	1.66e-85	2e-84
C09D4.6|C09D4.6|C09D4.6	0.513	3.8	7.41061	0.0453	0.0731
C09D4.8|C09D4.8	0	0	NaN	NA	NA
C09D8.10|C09D8.10	0	0	NaN	NA	NA
C09D8.11|C09D8.11	0.131	0.142	1.08387	0.85	0.958
C09D8.12|C09D8.12	0	0	NaN	NA	NA
C09D8.13|C09D8.13	0	0	NaN	NA	NA
C09D8.14|C09D8.14	0	0	NaN	NA	NA
C09D8.15|C09D8.15	0	0	NaN	NA	NA
C09D8.2|C09D8.2	0	0	NaN	NA	NA
C09D8.3|C09D8.3	0	0.164	Inf	0.825	0.945
C09D8.4|C09D8.4	0	0	NaN	NA	NA
C09D8.5|C09D8.5	0	0.353	Inf	0.826	0.945
C09D8.6|C09D8.6	0	0	NaN	NA	NA
C09D8.7|C09D8.7	0.12	0.822	6.82319	0.68	0.852
C09D8.8|C09D8.8	0	0.284	Inf	0.808	0.945
C09D8.9|C09D8.9	0	0	NaN	NA	NA
C09E7.10|C09E7.10|C09E7.10	82.6	115	1.39206	0.00359	0.00654
C09E7.4|C09E7.4|C09E7.4	229	317	1.38491	8.4e-35	4.54e-34
C09E7.5|C09E7.5|C09E7.5	12.2	18.6	1.53194	0.496	0.654
C09E7.6|C09E7.6|C09E7.6	25.3	38.5	1.51987	1.04e-05	2.3e-05
C09E7.7|C09E7.7|C09E7.7	1930	2390	1.24145	5.22e-98	7.42e-97
C09E7.8|C09E7.8|C09E7.8a	430	595	1.38499	4.45e-67	4.13e-66
C09E7.8|C09E7.8|C09E7.8b	419	580	1.38437	4.17e-65	3.76e-64
C09E7.9|C09E7.9|C09E7.9	294	379	1.28906	3.68e-28	1.73e-27
C09E8.1|C09E8.1|C09E8.1a	1290	1140	0.88633	7.87e-07	1.84e-06
C09E8.1|C09E8.1|C09E8.1b	1140	958	0.84368	2.31e-05	4.97e-05
C09E9.1|C09E9.1|C09E9.1	280	274	0.98109	5.2e-12	1.53e-11
C09F12.2|C09F12.2|C09F12.2	288	315	1.09428	0.166	0.245
C09F12.3|C09F12.3|C09F12.3	94.8	66.4	0.70044	1.9e-11	5.46e-11
C09F12.6|C09F12.6	17	27.5	1.61904	0.00131	0.00247
C09F5.1|C09F5.1|C09F5.1	662	689	1.041	0.000293	0.000585
C09F5.3|C09F5.3|C09F5.3	7.67	7.38	0.96295	0.581	0.748
C09F9.1|C09F9.1|C09F9.1	63.2	46.8	0.74072	0.0207	0.0348
C09F9.2|C09F9.2|C09F9.2	3730	3630	0.97244	4.95e-05	0.000104
C09F9.4|C09F9.4	690	573	0.83037	1.44e-06	3.32e-06
C09F9.7|C09F9.7	388	380	0.97846	1.72e-09	4.58e-09
C09F9.8|C09F9.8	11.6	11.4	0.98181	0.251	0.358
C09G1.2|C09G1.2|C09G1.2	4.3	14.1	3.26617	1.54e-10	4.27e-10
C09G1.3|C09G1.3|C09G1.3	0.12	1.6	13.2824	0.251	0.358
C09G1.4|C09G1.4|C09G1.4	363	355	0.97725	0.11	0.167
C09G1.5|C09G1.5|C09G1.5	285	367	1.28522	0.875	0.979
C09G1.6|C09G1.6	0	0	NaN	NA	NA
C09G12.17|C09G12.17|C09G12.17	0.492	1.36	2.76364	0.691	0.862
C09G12.18|C09G12.18	0	0.142	Inf	0.825	0.945
C09G12.19|C09G12.19	6.19	5.67	0.91704	1	1
C09G12.5|C09G12.5|C09G12.5	1.28	0.753	0.58726	0.902	0.997
C09G12.t1|C09G12.t1	1.23	1.46	1.18732	1	1
C09G4.2|C09G4.2|C09G4.2a	890	895	1.00566	1.21e-15	4.03e-15
C09G4.2|C09G4.2|C09G4.2b	1480	1460	0.98726	5.3e-18	1.9e-17
C09G4.2|C09G4.2|C09G4.2c	1170	1140	0.97604	1.58e-10	4.4e-10
C09G4.2|C09G4.2|C09G4.2d	2660	2610	0.98378	6.27e-27	2.86e-26
C09G4.4|C09G4.4|C09G4.4	183	343	1.87231	0.0736	0.115
C09G5.10|C09G5.10	0	0	NaN	NA	NA
C09G5.11|C09G5.11	0.382	0	0	1	1
C09G5.12|C09G5.12	0	0	NaN	NA	NA
C09G5.7|C09G5.7|C09G5.7	96.4	110	1.1432	9.78e-06	2.16e-05
C09G5.8|C09G5.8	1.62	4.81	2.97168	0.0902	0.14
C09G5.8|C09G5.8|C09G5.8a	88.8	132	1.48587	0.0539	0.086
C09G5.8|C09G5.8|C09G5.8b	27.1	46.3	1.70727	2.45e-07	5.89e-07
C09G9.1|C09G9.1|C09G9.1	2270	1830	0.80553	1.55e-21	6.11e-21
C09G9.2|C09G9.2|C09G9.2a	733	592	0.80795	3.99e-22	1.6e-21
C09G9.2|C09G9.2|C09G9.2b	2160	1760	0.81602	1.95e-65	1.77e-64
C09G9.3|C09G9.3|C09G9.3a	13.2	54.7	4.14001	1.44e-07	3.5e-07
C09G9.3|C09G9.3|C09G9.3b	11.2	40.5	3.6057	1.35e-05	2.95e-05
C09G9.5|C09G9.5|C09G9.5a	391	1530	3.91	NaN	NaN
C09G9.5|C09G9.5|C09G9.5b	189	728	3.85423	2.49e-34	1.33e-33
C09G9.8|C09G9.8|C09G9.8a	0.265	0	0	1	1
C09G9.8|C09G9.8|C09G9.8b	0.464	0.652	1.40547	1	1
C09G9.9|C09G9.9	0.12	0	0	1	1
C09H10.10|C09H10.10|C09H10.10	289	337	1.16738	3.75e-11	1.07e-10
C09H10.11|C09H10.11	0	0.142	Inf	0.825	0.945
C09H10.12|C09H10.12	0	0	NaN	NA	NA
C09H10.13|C09H10.13	2.49	2.96	1.18601	0.855	0.961
C09H10.14|C09H10.14	0	0	NaN	NA	NA
C09H10.15|C09H10.15	0	0	NaN	NA	NA
C09H10.16|C09H10.16	0	0	NaN	NA	NA
C09H10.17|C09H10.17	0	0	NaN	NA	NA
C09H10.18|C09H10.18	0	0	NaN	NA	NA
C09H10.5|C09H10.5|C09H10.5	237	259	1.0935	0.000684	0.00132
C09H10.7|C09H10.7|C09H10.7	180	271	1.50925	5.51e-36	3.03e-35
C09H10.9|C09H10.9|C09H10.9	118	124	1.04561	8.38e-05	0.000174
C09H5.1|C09H5.1|C09H5.1	0	0.353	Inf	0.826	0.945
C09H5.7|C09H5.7|C09H5.7	116	68.1	0.58794	2.5e-13	7.72e-13
C10A4.10|C10A4.10|C10A4.10	151	84.2	0.5583	3.01e-23	1.24e-22
C10A4.11|C10A4.11	0	0	NaN	NA	NA
C10A4.12|C10A4.12	0	0	NaN	NA	NA
C10A4.1|C10A4.1|C10A4.1	3.39	5.62	1.6581	0.101	0.155
C10A4.2|C10A4.2|C10A4.2	2.98	3	1.00649	0.859	0.965
C10A4.3|C10A4.3|C10A4.3	34.3	24.3	0.70787	0.000792	0.00152
C10A4.4|C10A4.4|C10A4.4	5.17	7.33	1.41702	0.178	0.261
C10A4.5|C10A4.5|C10A4.5	65.9	68.7	1.04181	0.171	0.252
C10A4.6|C10A4.6|C10A4.6	8.61	3.66	0.42468	0.0016	0.00301
C10A4.7|C10A4.7|C10A4.7	9.26	5.39	0.58193	0.00543	0.00972
C10A4.9|C10A4.9|C10A4.9	164	144	0.8791	3.41e-32	1.74e-31
C10B5.1|C10B5.1|C10B5.1	149	94.7	0.63683	4.43e-25	1.92e-24
C10B5.3|C10B5.3|C10B5.3	371	372	1.00196	8.04e-06	1.78e-05
C10B5.4|C10B5.4	0	0	NaN	NA	NA
C10C5.10|C10C5.10	0	0	NaN	NA	NA
C10C5.11|C10C5.11	0	0	NaN	NA	NA
C10C5.1|C10C5.1|C10C5.1a	522	705	1.35038	1.72e-62	1.49e-61
C10C5.1|C10C5.1|C10C5.1b	514	694	1.35127	2.74e-62	2.38e-61
C10C5.1|C10C5.1|C10C5.1c	526	716	1.36011	3.53e-66	3.24e-65
C10C5.2|C10C5.2|C10C5.2	393	510	1.29782	7.06e-13	2.14e-12
C10C5.3|C10C5.3|C10C5.3	117	76.1	0.64845	0.0624	0.0987
C10C5.4|C10C5.4|C10C5.4	133	109	0.81784	0.395	0.536
C10C5.5|C10C5.5|C10C5.5	77.3	38.9	0.50294	3.62e-07	8.62e-07
C10C5.7|C10C5.7|C10C5.7	275	560	2.03624	0.946	1
C10C5.9|C10C5.9	0	0.284	Inf	0.808	0.945
C10C6.11|C10C6.11	2.96	8.34	2.81845	0.0119	0.0206
C10C6.12|C10C6.12	0	0	NaN	NA	NA
C10C6.3|C10C6.3|C10C6.3	119	83.4	0.70329	1.03e-05	2.26e-05
C10C6.6|C10C6.6|C10C6.6	4170	5470	1.31148	1.99e-268	1.15e-266
C10C6.7|C10C6.7|C10C6.7a	61.6	47	0.76358	5.22e-07	1.23e-06
C10C6.7|C10C6.7|C10C6.7b	104	74.6	0.71881	1.36e-15	4.52e-15
C10C6.8|C10C6.8	1.51	5.53	3.65721	0.0187	0.0317
C10C6.9|C10C6.9	180	293	1.6268	0.839	0.951
C10E2.1|C10E2.1|C10E2.1	24.7	25.6	1.03581	0.934	1
C10E2.2|C10E2.2|C10E2.2	184	204	1.10903	4.81e-05	0.000101
C10E2.4|C10E2.4|C10E2.4	17.3	9.65	0.55791	0.00398	0.00722
C10E2.5|C10E2.5|C10E2.5	13.6	9.91	0.72808	0.0575	0.0913
C10E2.6|C10E2.6|C10E2.6	5740	4070	0.70933	4.18e-154	1.13e-152
C10E2.7|C10E2.7	0	0.495	Inf	0.773	0.937
C10E2.8|C10E2.8	0	0	NaN	NA	NA
C10F3.10|C10F3.10	0	0	NaN	NA	NA
C10F3.11|C10F3.11	0	0.652	Inf	0.827	0.945
C10F3.12|C10F3.12	0	0	NaN	NA	NA
C10F3.13|C10F3.13	0	0	NaN	NA	NA
C10F3.14|C10F3.14	0	0	NaN	NA	NA
C10F3.15|C10F3.15	0.251	0	0	1	1
C10F3.16|C10F3.16	0	0	NaN	NA	NA
C10F3.17|C10F3.17	0	0	NaN	NA	NA
C10F3.4|C10F3.4|C10F3.4a	445	559	1.25591	4.94e-26	2.2e-25
C10F3.4|C10F3.4|C10F3.4b	246	309	1.25515	2.88e-13	8.86e-13
C10F3.7|C10F3.7|C10F3.7	10.4	42.9	4.10646	0.00259	0.00478
C10F3.9|C10F3.9	0	0	NaN	NA	NA
C10G11.10|C10G11.10|C10G11.10	41.3	42.1	1.01896	0.108	0.165
C10G11.12|C10G11.12	0	0	NaN	NA	NA
C10G11.13|C10G11.13	0	0	NaN	NA	NA
C10G11.14|C10G11.14	0.319	0.142	0.44439	1	1
C10G11.15|C10G11.15	0	0	NaN	NA	NA
C10G11.16|C10G11.16	0.12	0	0	1	1
C10G11.17|C10G11.17	0.382	0.142	0.37143	1	1
C10G11.1|C10G11.1|C10G11.1	50.1	39.3	0.78501	0.156	0.232
C10G11.6|C10G11.6|C10G11.6	434	433	0.99888	2.52e-07	6.04e-07
C10G11.7|C10G11.7|C10G11.7	8450	7860	0.93055	3.06e-43	1.94e-42
C10G11.8|C10G11.8|C10G11.8	386	457	1.18553	1.02e-22	4.17e-22
C10G11.9|C10G11.9|C10G11.9	558	440	0.78811	4.11e-05	8.7e-05
C10G6.51|C10G6.51	0	0	NaN	NA	NA
C10G6.52|C10G6.52	0	0	NaN	NA	NA
C10G6.53|C10G6.53	0	0	NaN	NA	NA
C10G8.2|C10G8.2|C10G8.2	0.591	0.306	0.51717	1	1
C10G8.3|C10G8.3|C10G8.3	32.6	57.5	1.76495	0.912	1
C10G8.4|C10G8.4|C10G8.4	1.41	5.85	4.141	0.294	0.413
C10G8.8|C10G8.8|C10G8.8a	1140	1360	1.19404	1.7e-26	7.69e-26
C10G8.8|C10G8.8|C10G8.8b	1930	2270	1.17426	1.34e-41	8.28e-41
C10G8.9|C10G8.9	0	0.142	Inf	0.825	0.945
C10G8.t1|C10G8.t1	0	0.142	Inf	0.825	0.945
C10H11.11|C10H11.11	0.45	0.327	0.72779	1	1
C10H11.12|C10H11.12	0.131	1.17	8.97903	0.516	0.677
C10H11.13|C10H11.13	0	0	NaN	NA	NA
C10H11.14|C10H11.14	0.396	0.517	1.30384	0.933	1
C10H11.7|C10H11.7|C10H11.7	82	56.1	0.68442	8.19e-06	1.82e-05
C10H11.8|C10H11.8|C10H11.8	448	367	0.81832	3.68e-06	8.32e-06
C11D2.100|C11D2.100	0.12	0	0	1	1
C11D2.101|C11D2.101	0	0	NaN	NA	NA
C11D2.1|C11D2.1|C11D2.1	0	0	NaN	NA	NA
C11D2.2|C11D2.2|C11D2.2	19.9	20.5	1.02765	0.993	1
C11D2.3|C11D2.3|C11D2.3	40.8	97.9	2.40187	0.983	1
C11D2.4|C11D2.4|C11D2.4	1680	1510	0.89579	2.27e-11	6.5e-11
C11D2.7|C11D2.7|C11D2.7	2180	2260	1.03692	1.37e-95	1.9e-94
C11D2.98|C11D2.98	0	0	NaN	NA	NA
C11D2.99|C11D2.99	0	0.353	Inf	0.826	0.945
C11E4.10|C11E4.10	0	0	NaN	NA	NA
C11E4.11|C11E4.11	0	0	NaN	NA	NA
C11E4.12|C11E4.12	0	0	NaN	NA	NA
C11E4.13|C11E4.13	0	0	NaN	NA	NA
C11E4.14|C11E4.14	0	0.164	Inf	0.825	0.945
C11E4.15|C11E4.15	0	0	NaN	NA	NA
C11E4.16|C11E4.16	0	0	NaN	NA	NA
C11E4.17|C11E4.17	0	0	NaN	NA	NA
C11E4.1|C11E4.1|C11E4.1	932	591	0.63455	6.51e-25	2.81e-24
C11E4.2|C11E4.2|C11E4.2	465	250	0.53767	2.15e-37	1.22e-36
C11E4.6|C11E4.6|C11E4.6	1060	1650	1.55656	5.28e-178	1.79e-176
C11E4.7|C11E4.7|C11E4.7	17	25.7	1.51301	1	1
C11E4.8|C11E4.8|C11E4.8	18.4	30.3	1.64996	0.681	0.853
C11E4.9|C11E4.9	0	0	NaN	NA	NA
C11E4.t1|C11E4.t1	0.792	0.794	1.00245	1	1
C11G10.10|C11G10.10	0	0	NaN	NA	NA
C11G10.11|C11G10.11	0.956	1.47	1.53505	0.901	0.996
C11G10.12|C11G10.12	0	0	NaN	NA	NA
C11G10.13|C11G10.13	0.265	0	0	1	1
C11G10.1|C11G10.1|C11G10.1	213	482	2.26035	9.82e-06	2.17e-05
C11G10.2|C11G10.2|C11G10.2	19.5	31.5	1.61907	3.95e-08	9.88e-08
C11G10.3|C11G10.3	0.265	0	0	1	1
C11G10.4|C11G10.4	0.131	0	0	1	1
C11G10.5|C11G10.5	0	0	NaN	NA	NA
C11G10.6|C11G10.6	0	0	NaN	NA	NA
C11G10.7|C11G10.7	0	0	NaN	NA	NA
C11G10.8|C11G10.8	0	0	NaN	NA	NA
C11G10.9|C11G10.9	0	0.142	Inf	0.825	0.945
C11G10.t1|C11G10.t1	0	0	NaN	NA	NA
C11G6.2|C11G6.2|C11G6.2	0.329	0.495	1.50108	0.918	1
C11G6.3|C11G6.3|C11G6.3	190	222	1.16891	6.51e-16	2.19e-15
C11G6.5|C11G6.5	0	0	NaN	NA	NA
C11G6.6|C11G6.6	0	0	NaN	NA	NA
C11H1.10|C11H1.10	0	0	NaN	NA	NA
C11H1.11|C11H1.11	0	0	NaN	NA	NA
C11H1.2|C11H1.2|C11H1.2	484	360	0.74433	1.98e-27	9.15e-27
C11H1.3|C11H1.3|C11H1.3	674	807	1.19671	2.5e-23	1.03e-22
C11H1.5|C11H1.5|C11H1.5	601	1020	1.69373	5.25e-79	5.79e-78
C11H1.7|C11H1.7|C11H1.7	194	537	2.76219	1.87e-09	4.97e-09
C11H1.8|C11H1.8|C11H1.8	76.9	97.8	1.27119	2.33e-09	6.14e-09
C11H1.9|C11H1.9|C11H1.9a	1210	1230	1.01273	0.231	0.332
C11H1.9|C11H1.9|C11H1.9b	1110	1130	1.02207	0.297	0.417
C12C8.2|C12C8.2|C12C8.2a	974	1070	1.09525	1.21e-05	2.65e-05
C12C8.2|C12C8.2|C12C8.2b	481	540	1.12442	2.7e-07	6.47e-07
C12C8.5|C12C8.5	0.527	4.5	8.54778	0.0115	0.0199
C12C8.6|C12C8.6	0	0	NaN	NA	NA
C12C8.7|C12C8.7	0.527	4.36	8.27849	0.0224	0.0375
C12C8.t1|C12C8.t1	0	4.08	Inf	0.00816	0.0143
C12C8.t2|C12C8.t2	0	4.08	Inf	0.00816	0.0143
C12C8.t3|C12C8.t3	0	4.08	Inf	0.00816	0.0143
C12C8.t4|C12C8.t4	0	4.08	Inf	0.00816	0.0143
C12C8.t5|C12C8.t5	0	4.08	Inf	0.00816	0.0143
C12C8.t6|C12C8.t6	0	4.08	Inf	0.00816	0.0143
C12D12.10|C12D12.10	0	0.142	Inf	0.825	0.945
C12D12.1|C12D12.1|C12D12.1a	2580	2030	0.78568	6.11e-11	1.72e-10
C12D12.1|C12D12.1|C12D12.1b	2230	1760	0.78637	6.8e-11	1.92e-10
C12D12.1|C12D12.1|C12D12.1c	2750	2190	0.79505	6.65e-09	1.72e-08
C12D12.3|C12D12.3|C12D12.3	38.7	73.9	1.91046	0.735	0.904
C12D12.4|C12D12.4|C12D12.4	0	0	NaN	NA	NA
C12D12.7|C12D12.7	0	0.936	Inf	0.59	0.757
C12D12.9|C12D12.9	0	0	NaN	NA	NA
C12D5.10|C12D5.10|C12D5.10	141	349	2.46876	0.786	0.945
C12D5.3|C12D5.3|C12D5.3	94.6	50.2	0.53007	7.13e-20	2.69e-19
C12D5.4|C12D5.4|C12D5.4	21.5	12.6	0.58424	2.53e-05	5.45e-05
C12D5.5|C12D5.5|C12D5.5	47	42.8	0.90959	0.429	0.576
C12D5.9|C12D5.9|C12D5.9	282	140	0.49715	8.98e-72	8.96e-71
C12D8.13|C12D8.13|C12D8.13	6.5	38.5	5.92311	0.00043	0.000844
C12D8.15|C12D8.15|C12D8.15	55.8	192	3.4414	2.62e-08	6.59e-08
C12D8.1|C12D8.1	1640	1830	1.1163	7.89e-09	2.03e-08
C12D8.1|C12D8.1|C12D8.1a	1740	1960	1.13175	9.51e-12	2.77e-11
C12D8.1|C12D8.1|C12D8.1b	1770	2090	1.17954	1.8e-16	6.15e-16
C12D8.1|C12D8.1|C12D8.1c	5070	5760	1.13729	8.68e-31	4.31e-30
C12D8.20|C12D8.20|C12D8.20	4.56	8.15	1.78862	0.826	0.945
C12D8.21|C12D8.21|C12D8.21a	7.92	34.1	4.31357	0.00472	0.00849
C12D8.21|C12D8.21|C12D8.21b	0.502	1.96	3.8945	0.992	1
C12D8.22|C12D8.22	0.261	0	0	1	1
C12D8.23|C12D8.23	0.131	0	0	1	1
C12D8.24|C12D8.24	0.261	0.652	2.49515	1	1
C12D8.25|C12D8.25	0	0	NaN	NA	NA
C12D8.2|C12D8.2	2.78	0.844	0.30323	0.0384	0.0625
C12D8.3|C12D8.3	0.261	1.3	4.99029	0.815	0.945
C12D8.7|C12D8.7	0.397	0.353	0.88794	1	1
C12D8.9|C12D8.9|C12D8.9a	40.5	29.8	0.73571	8.6e-05	0.000178
C12D8.9|C12D8.9|C12D8.9b	40.1	29.8	0.74156	0.000118	0.000242
C13A10.1|C13A10.1|C13A10.1	180	173	0.96553	0.052	0.083
C13A10.2|C13A10.2|C13A10.2	308	474	1.54093	0.00248	0.00458
C13A10.4|C13A10.4	0	0.142	Inf	0.825	0.945
C13A10.5|C13A10.5	0	0.142	Inf	0.825	0.945
C13A2.10|C13A2.10|C13A2.10	0.764	1.12	1.46846	0.935	1
C13A2.11|C13A2.11|C13A2.11	0.643	0.142	0.2205	1	1
C13A2.12|C13A2.12|C13A2.12	19.8	45	2.27839	0.592	0.76
C13A2.1|C13A2.1|C13A2.1	9.92	9.13	0.9199	0.863	0.968
C13A2.2|C13A2.2|C13A2.2	0	0	NaN	NA	NA
C13A2.3|C13A2.3|C13A2.3	61.2	70.6	1.15267	0.98	1
C13A2.4|C13A2.4|C13A2.4	5.9	4.37	0.73969	0.00268	0.00493
C13A2.5|C13A2.5|C13A2.5	0.653	0.986	1.50849	0.689	0.861
C13A2.6|C13A2.6|C13A2.6	1.22	1.96	1.60245	0.832	0.946
C13A2.7|C13A2.7|C13A2.7	0.392	0	0	1	1
C13A2.7|C13A2.7|C13A2.7b	0.513	2.77	5.40341	0.708	0.877
C13A2.8|C13A2.8	0	0.164	Inf	0.825	0.945
C13A2.9|C13A2.9|C13A2.9	0.864	5.88	6.80168	0.00727	0.0128
C13B4.1|C13B4.1|C13B4.1a	623	626	1.00486	2.72e-17	9.55e-17
C13B4.1|C13B4.1|C13B4.1b	1210	1220	1.00522	4.96e-33	2.58e-32
C13B4.5|C13B4.5	0	0.142	Inf	0.825	0.945
C13B4.6|C13B4.6	0	0	NaN	NA	NA
C13B4.t1|C13B4.t1	0	0.142	Inf	0.825	0.945
C13B7.6|C13B7.6|C13B7.6	436	484	1.11156	0.856	0.962
C13B9.2|C13B9.2|C13B9.2	184	127	0.69003	2.55e-15	8.43e-15
C13B9.3|C13B9.3|C13B9.3	2060	1990	0.96546	0.572	0.739
C13B9.5|C13B9.5	0	0	NaN	NA	NA
C13C12.2|C13C12.2|C13C12.2	508	568	1.11801	0.0992	0.152
C13C12.4|C13C12.4	0	0	NaN	NA	NA
C13C12.5|C13C12.5	0	0	NaN	NA	NA
C13C12.6|C13C12.6	5.21	9.8	1.8823	0.0286	0.0473
C13C4.10|C13C4.10	0.199	0.164	0.82429	0.868	0.972
C13C4.11|C13C4.11	0.647	0.164	0.25289	1	1
C13C4.12|C13C4.12	0.372	0.447	1.20324	0.897	0.993
C13C4.4|C13C4.4|C13C4.4	234	159	0.67858	6.71e-25	2.9e-24
C13C4.5|C13C4.5|C13C4.5	2330	1620	0.6958	9.02e-57	7.17e-56
C13C4.6|C13C4.6|C13C4.6	107	141	1.31795	4.33e-10	1.18e-09
C13C4.7|C13C4.7|C13C4.7	240	498	2.0758	0.315	0.44
C13C4.8|C13C4.8|C13C4.8	36.2	60.2	1.66442	0.0168	0.0285
C13C4.9|C13C4.9	0	0.142	Inf	0.825	0.945
C13D9.13|C13D9.13	3.24	0.306	0.09423	0.00785	0.0138
C13E3.1|C13E3.1|C13E3.1	180	242	1.34076	5.25e-23	2.16e-22
C13F10.1|C13F10.1|C13F10.1a	189	379	2.0052	0.0075	0.0132
C13F10.1|C13F10.1|C13F10.1b	98.2	181	1.84137	0.211	0.305
C13F10.2|C13F10.2|C13F10.2	208	346	1.66527	7.29e-05	0.000152
C13F10.4|C13F10.4|C13F10.4	1520	2180	1.43401	1.25e-199	5.14e-198
C13F10.5|C13F10.5|C13F10.5	326	450	1.37883	0.000291	0.00058
C13F10.6|C13F10.6|C13F10.6	373	351	0.94101	0.875	0.979
C13F10.7|C13F10.7|C13F10.7	1140	1080	0.94791	8.42e-69	8.01e-68
C13G3.10|C13G3.10	0	0	NaN	NA	NA
C13G3.11|C13G3.11	0	0	NaN	NA	NA
C13G3.1|C13G3.1|C13G3.1	191	195	1.02188	0.255	0.363
C13G3.4|C13G3.4	0	0	NaN	NA	NA
C13G3.5|C13G3.5	0	0.142	Inf	0.825	0.945
C13G3.6|C13G3.6	0	0.142	Inf	0.825	0.945
C13G3.7|C13G3.7	0	0	NaN	NA	NA
C13G3.8|C13G3.8	0.464	0.306	0.6586	0.915	1
C13G3.9|C13G3.9	0	0	NaN	NA	NA
C13G5.2|C13G5.2|C13G5.2	317	262	0.82469	1.41e-09	3.75e-09
C13G5.3|C13G5.3	0	0	NaN	NA	NA
C14A11.10|C14A11.10	0	0	NaN	NA	NA
C14A11.11|C14A11.11	9.27	9.28	1.00156	0.219	0.316
C14A11.2|C14A11.2|C14A11.2	38	49.1	1.29222	0.0221	0.0371
C14A11.5|C14A11.5|C14A11.5	30.6	68.1	2.23019	1.26e-11	3.64e-11
C14A11.6|C14A11.6|C14A11.6	105	64.1	0.60979	1.23e-23	5.13e-23
C14A11.9|C14A11.9|C14A11.9	303	271	0.89597	0.262	0.372
C14A4.11|C14A4.11|C14A4.11	1790	1570	0.88081	3.15e-27	1.45e-26
C14A4.12|C14A4.12|C14A4.12a	368	353	0.96147	5.78e-05	0.000121
C14A4.12|C14A4.12|C14A4.12b	329	321	0.97447	4.56e-05	9.62e-05
C14A4.13|C14A4.13|C14A4.13	120	137	1.1458	3.25e-06	7.37e-06
C14A4.14|C14A4.14|C14A4.14	2570	2210	0.85925	9.78e-12	2.84e-11
C14A4.3|C14A4.3|C14A4.3	939	937	0.99821	0.424	0.571
C14A4.6|C14A4.6|C14A4.6	1490	2870	1.92255	NaN	NaN
C14A4.7|C14A4.7|C14A4.7a	408	1240	3.03074	0	0
C14A4.7|C14A4.7|C14A4.7b	190	566	2.98695	5.96e-16	2.01e-15
C14A4.8|C14A4.8|C14A4.8	107	103	0.96521	0.848	0.958
C14A4.9|C14A4.9|C14A4.9	877	2310	2.6362	0	0
C14A6.10|C14A6.10	140	130	0.93442	8.39e-06	1.86e-05
C14A6.12|C14A6.12|C14A6.12	6.83	3.94	0.57718	0.0661	0.104
C14A6.13|C14A6.13|C14A6.13	243	140	0.57517	1.09e-26	4.92e-26
C14A6.14|C14A6.14	1.38	0.469	0.33961	0.58	0.747
C14A6.15|C14A6.15	0.199	0	0	1	1
C14A6.2|C14A6.2|C14A6.2	22.6	32.5	1.43376	0.00172	0.00322
C14A6.3|C14A6.3|C14A6.3	11.6	19.3	1.67487	1.81e-05	3.93e-05
C14A6.5|C14A6.5|C14A6.5	39.9	22.5	0.56312	9.51e-06	2.1e-05
C14A6.6|C14A6.6|C14A6.6	198	115	0.58257	1.4e-21	5.52e-21
C14A6.7|C14A6.7|C14A6.7	11.9	4.45	0.37309	3.69e-06	8.34e-06
C14A6.8|C14A6.8|C14A6.8	10.1	8.76	0.86637	0.996	1
C14A6.9|C14A6.9	6.38	8.6	1.34619	0.149	0.222
[truncated: 32,874 more rows]

## Sheet: Embryo stage N2_vs_ADAR,rde-1
Gene ID	Normalized mean counts wildtype	Normalized mean counts ADAR;rde-1 mutants	foldChange ADAR;rde-1 mutant/wildtype	pval	padj
2L52.1|2L52.1|2L52.1	946	1180	1.25	4.15e-06	1.19e-05
2L52.2|2L52.2	90.8	169	1.86	1.65e-14	7.93e-14
2RSSE.1|2RSSE.1|2RSSE.1	1350	1240	0.923	2.71e-09	9.8e-09
2RSSE.2|2RSSE.2|2RSSE.2	619	590	0.952	0.000548	0.00129
2RSSE.3|2RSSE.3	450	433	0.961	0.00459	0.00972
2RSSE.4|2RSSE.4	0	1.03	Inf	0.522	0.683
2RSSE.5|2RSSE.5	106	199	1.88	2.16e-17	1.18e-16
2RSSE.6|2RSSE.6	14	9.24	0.66	0.844	0.975
2RSSE.7|2RSSE.7	104	194	1.87	1.44e-15	7.31e-15
2RSSE.8|2RSSE.8	0.112	0.253	2.26	0.573	0.733
3R5.2|3R5.2	254	295	1.16	0.768	0.905
4R79.2|4R79.2|4R79.2a	73.2	91	1.24	1.07e-24	7.77e-24
4R79.2|4R79.2|4R79.2b	71	88.2	1.24	1.69e-24	1.22e-23
6R55.2|6R55.2|6R55.2	2.8	2.81	1	1	1
AC3.11|AC3.11	0	0	NaN	NA	NA
AC3.12|AC3.12	0	0	NaN	NA	NA
AC3.13|AC3.13	17.3	52.3	3.02	0.000921	0.00212
AC3.14|AC3.14	1.18	3.84	3.26	0.072	0.125
AC3.15|AC3.15	0	0	NaN	NA	NA
AC3.16|AC3.16	7.38	7.6	1.03	0.11	0.184
AC3.5|AC3.5|AC3.5	56.2	269	4.79	1.47e-248	1.83e-246
AC3.9|AC3.9	324	453	1.4	0.386	0.552
AC7.3|AC7.3|AC7.3	0.129	0.253	1.96	0.579	0.735
AC8.10|AC8.10|AC8.10	206	209	1.02	1.44e-07	4.67e-07
AC8.11|AC8.11|AC8.11	122	127	1.04	5.83e-06	1.66e-05
AC8.12|AC8.12|AC8.12	96	104	1.08	1.84e-05	5.01e-05
AC8.2|AC8.2	10.5	12	1.14	0.49	0.669
AC8.3|AC8.3|AC8.3	206	209	1.02	1.44e-07	4.67e-07
AC8.4|AC8.4|AC8.4	122	127	1.04	5.83e-06	1.66e-05
AC8.5|AC8.5	247	391	1.58	0.0727	0.126
AC8.6|AC8.6	76.8	130	1.7	0.00619	0.0129
AC8.7|AC8.7|AC8.7	96	104	1.08	1.84e-05	5.01e-05
AC8.9|AC8.9	116	151	1.3	0.366	0.529
AH10.2|AH10.2|AH10.2	66.7	29.8	0.446	4.66e-17	2.51e-16
AH10.3|AH10.3|AH10.3	73.4	116	1.58	1.13e-15	5.76e-15
AH10.4|AH10.4|AH10.4	10.1	10.2	1.01	0.189	0.299
AH10.7|AH10.7	0	0	NaN	NA	NA
AH10.8|AH10.8	0.623	1.03	1.66	1	1
AH10.9|AH10.9	0	0	NaN	NA	NA
AH6.3|AH6.3|AH6.3	1.45	1.79	1.24	0.434	0.607
AH9.1|AH9.1|AH9.1	103	92.5	0.899	0.253	0.386
AH9.3|AH9.3|AH9.3	842	924	1.1	0.00231	0.00507
AH9.4|AH9.4|AH9.4	18.1	22.1	1.22	4.88e-05	0.000128
AH9.6|AH9.6|AH9.6	84.8	102	1.2	2.38e-19	1.41e-18
AH9.7|AH9.7|AH9.7	104	80.1	0.772	0.0166	0.0325
B0001.10|B0001.10	0.399	0	0	1	1
B0001.11|B0001.11	1.64	3.06	1.87	0.249	0.38
B0001.12|B0001.12	3.85	5.13	1.33	0.36	0.521
B0001.2|B0001.2|B0001.2	791	1020	1.29	0.824	0.957
B0001.3|B0001.3|B0001.3a	899	1120	1.25	5.37e-06	1.53e-05
B0001.3|B0001.3|B0001.3b	861	1090	1.27	3.95e-07	1.24e-06
B0001.4|B0001.4|B0001.4	699	756	1.08	0.388	0.555
B0001.5|B0001.5|B0001.5	949	1000	1.06	0.0829	0.142
B0001.6|B0001.6|B0001.6	5210	4930	0.946	1.83e-16	9.6e-16
B0001.7|B0001.7|B0001.7	1190	1380	1.16	2.06e-08	7.06e-08
B0001.8|B0001.8|B0001.8	2730	2960	1.08	0.000379	0.000912
B0019.2|B0019.2|B0019.2	1860	2280	1.23	0.103	0.173
B0024.10|B0024.10|B0024.10	1350	1650	1.22	0.000219	0.00054
B0024.11|B0024.11|B0024.11	986	1440	1.46	1.62e-12	7.03e-12
B0024.13|B0024.13|B0024.13a	332	366	1.1	0.21	0.328
B0024.13|B0024.13|B0024.13b	307	339	1.1	0.267	0.404
B0024.15|B0024.15|B0024.15	43.6	42.8	0.981	4.7e-06	1.35e-05
B0024.17|B0024.17	0.241	0	0	1	1
B0024.18|B0024.18	0	0	NaN	NA	NA
B0024.3|B0024.3|B0024.3	118	107	0.905	0.432	0.605
B0024.4|B0024.4|B0024.4	50.9	216	4.25	9.91e-217	1.07e-214
B0025.4|B0025.4|B0025.4	936	1230	1.32	0.581	0.737
B0025.5|B0025.5|B0025.5	3.41	2.28	0.669	0.895	1
B0025.6|B0025.6	0	0	NaN	NA	NA
B0034.10|B0034.10	0	0	NaN	NA	NA
B0034.11|B0034.11	0	0.253	Inf	0.519	0.683
B0034.12|B0034.12	0.129	0	0	1	1
B0034.13|B0034.13	0.903	2.81	3.11	0.062	0.109
B0034.14|B0034.14	0	0	NaN	NA	NA
B0034.15|B0034.15	0	0	NaN	NA	NA
B0034.16|B0034.16	0.241	0.253	1.05	0.687	0.836
B0034.17|B0034.17	1.3	1.01	0.782	1	1
B0034.1|B0034.1|B0034.1	153	138	0.904	9.76e-09	3.41e-08
B0034.2|B0034.2|B0034.2	0	0.253	Inf	0.519	0.683
B0034.4|B0034.4|B0034.4	7.27	14.4	1.99	5.83e-08	1.94e-07
B0034.5|B0034.5|B0034.5	41.7	40.7	0.976	0.00615	0.0128
B0034.7|B0034.7|B0034.7	91.8	91.5	0.997	5.96e-07	1.84e-06
B0034.8|B0034.8	0.112	0	0	1	1
B0034.9|B0034.9	0	0.253	Inf	0.519	0.683
B0035.11|B0035.11|B0035.11	2980	3490	1.17	1.15e-11	4.76e-11
B0035.12|B0035.12|B0035.12	3020	4130	1.37	9.04e-21	5.71e-20
B0035.13|B0035.13|B0035.13	68.9	74	1.07	5.11e-10	1.93e-09
B0035.15|B0035.15|B0035.15	520	528	1.01	0.434	0.607
B0035.16|B0035.16|B0035.16	358	304	0.849	7e-10	2.63e-09
B0035.18|B0035.18|B0035.18	110	151	1.38	0.0856	0.147
B0035.19|B0035.19	0	0	NaN	NA	NA
B0035.1|B0035.1|B0035.1a	1430	1450	1.02	4.88e-18	2.73e-17
B0035.1|B0035.1|B0035.1b	1820	1860	1.02	4.98e-20	3.04e-19
B0035.3|B0035.3|B0035.3	388	471	1.21	0.172	0.275
B0035.6|B0035.6|B0035.6	1170	1810	1.55	1.03e-15	5.24e-15
B0041.10|B0041.10	0.224	1.29	5.74	0.628	0.781
B0041.1|B0041.1|B0041.1	16.6	7.68	0.462	0.115	0.191
B0041.3|B0041.3|B0041.3	274	230	0.839	0.229	0.355
B0041.5|B0041.5|B0041.5	942	992	1.05	0.914	1
B0041.8|B0041.8|B0041.8	1650	1630	0.99	9.14e-37	9.69e-36
B0041.9|B0041.9	0	0	NaN	NA	NA
B0198.10|B0198.10	0	0	NaN	NA	NA
B0198.2|B0198.2|B0198.2a	45.8	59.6	1.3	7.78e-17	4.16e-16
B0198.2|B0198.2|B0198.2b	30.1	45.9	1.52	1.13e-13	5.21e-13
B0198.3|B0198.3	45.8	56.7	1.24	9.89e-06	2.76e-05
B0198.3|B0198.3|B0198.3a	494	568	1.15	7.01e-36	7.27e-35
B0198.4|B0198.4	0	0	NaN	NA	NA
B0198.5|B0198.5	0	0	NaN	NA	NA
B0198.6|B0198.6	0	0.253	Inf	0.519	0.683
B0198.7|B0198.7	0	0.253	Inf	0.519	0.683
B0198.8|B0198.8	0	0	NaN	NA	NA
B0198.9|B0198.9	0	0.253	Inf	0.519	0.683
B0205.10|B0205.10|B0205.10	10.1	15.4	1.52	0.462	0.64
B0205.11|B0205.11|B0205.11	906	764	0.843	2.49e-22	1.67e-21
B0205.12|B0205.12|B0205.12	76.2	133	1.74	0.000604	0.00142
B0205.13|B0205.13|B0205.13	27.9	23.6	0.845	0.13	0.214
B0205.14|B0205.14|B0205.14	1.5	2.28	1.52	0.144	0.235
B0205.15|B0205.15	0	4.13	Inf	0.0116	0.0231
B0205.16|B0205.16	0.158	0	0	1	1
B0205.1|B0205.1|B0205.1a	1520	1630	1.08	2.78e-08	9.43e-08
B0205.1|B0205.1|B0205.1b	3430	3670	1.07	2.58e-18	1.47e-17
B0205.4|B0205.4|B0205.4	298	264	0.887	0.0133	0.0263
B0205.5|B0205.5|B0205.5	5.35	4.85	0.907	0.591	0.746
B0205.6|B0205.6|B0205.6	718	816	1.14	0.00277	0.00602
B0205.8|B0205.8|B0205.8	389	558	1.44	0.327	0.48
B0205.9|B0205.9|B0205.9	1260	1540	1.23	0.464	0.642
B0207.10|B0207.10|B0207.10	6.6	5.34	0.809	0.831	0.964
B0207.11|B0207.11|B0207.11	0.985	0.253	0.257	0.782	0.917
B0207.13|B0207.13	7.42	8.65	1.17	0.155	0.251
B0207.14|B0207.14	0.382	0	0	1	1
B0207.15|B0207.15	0.122	0.253	2.08	0.576	0.734
B0207.16|B0207.16	0	0	NaN	NA	NA
B0207.1|B0207.1|B0207.1	2.37	1.01	0.427	0.952	1
B0207.2|B0207.2|B0207.2	105	94.5	0.901	0.00549	0.0115
B0207.5|B0207.5|B0207.5	110	117	1.06	0.504	0.683
B0207.6|B0207.6|B0207.6	392	414	1.06	0.0814	0.14
B0207.7|B0207.7|B0207.7	2.9	2.03	0.699	0.837	0.969
B0207.8|B0207.8|B0207.8	0.336	0.76	2.26	0.576	0.734
B0207.9|B0207.9|B0207.9	0.382	0.253	0.663	1	1
B0212.3|B0212.3|B0212.3	794	881	1.11	0.00787	0.0161
B0212.4|B0212.4|B0212.4a	140	129	0.919	8.06e-05	0.000207
B0212.4|B0212.4|B0212.4b	132	121	0.916	0.000204	0.000506
B0212.4|B0212.4|B0212.4c	150	139	0.921	7.05e-05	0.000182
B0212.6|B0212.6|B0212.6	24.9	38.6	1.55	1.04e-11	4.31e-11
B0212.7|B0212.7	0	1.03	Inf	0.522	0.683
B0212.8|B0212.8	0	2.07	Inf	0.237	0.365
B0212.9|B0212.9	0	0	NaN	NA	NA
B0212.t1|B0212.t1	0	1.03	Inf	0.522	0.683
B0213.18|B0213.18	0.623	0.507	0.813	0.983	1
B0213.21|B0213.21	0	0.507	Inf	0.477	0.655
B0213.22|B0213.22	0.112	1.03	9.23	0.714	0.858
B0213.23|B0213.23	0	0	NaN	NA	NA
B0213.24|B0213.24	4.52	4.35	0.961	0.586	0.743
B0213.25|B0213.25	0	0	NaN	NA	NA
B0218.5|B0218.5|B0218.5	6.81	39.4	5.79	6.61e-39	7.37e-38
B0218.7|B0218.7|B0218.7	0.715	4.56	6.38	1.27e-06	3.82e-06
B0222.10|B0222.10|B0222.10	1.58	1.27	0.801	1	1
B0222.11|B0222.11|B0222.11	5.07	8.65	1.71	0.017	0.0331
B0222.14|B0222.14	0.392	0.507	1.29	0.713	0.858
B0222.1|B0222.1|B0222.1	29.7	47.5	1.6	1.2e-16	6.36e-16
B0222.2|B0222.2|B0222.2	0.616	1.54	2.5	0.774	0.91
B0222.3|B0222.3|B0222.3	203	180	0.888	1.41e-06	4.22e-06
B0222.5|B0222.5|B0222.5	48.6	48	0.986	0.00969	0.0196
B0222.9|B0222.9|B0222.9	526	639	1.22	0.229	0.355
B0228.1|B0228.1|B0228.1	81.3	55.4	0.681	0.544	0.706
B0228.6|B0228.6|B0228.6	597	412	0.69	5.42e-14	2.54e-13
B0228.7|B0228.7|B0228.7	1350	1390	1.03	5.63e-05	0.000147
B0228.8|B0228.8|B0228.8	1.07	1.29	1.2	0.9	1
B0228.9|B0228.9|B0228.9	4.45	1.01	0.228	0.0129	0.0256
B0228.t1|B0228.t1	0.336	9.3	27.7	0.00173	0.00386
B0238.10|B0238.10|B0238.10	2370	2450	1.04	0.724	0.865
B0238.11|B0238.11|B0238.11	3920	3230	0.824	3.02e-115	1.35e-113
B0238.12|B0238.12|B0238.12	31.5	50.4	1.6	2.9e-17	1.58e-16
B0238.13|B0238.13|B0238.13	165	173	1.05	0.0616	0.109
B0238.15|B0238.15|B0238.15	25.8	15.9	0.615	0.0135	0.0267
B0238.18|B0238.18	11.9	10.4	0.881	0.587	0.743
B0238.1|B0238.1|B0238.1	384	460	1.2	7.11e-24	5.03e-23
B0238.7|B0238.7|B0238.7	0.902	0.507	0.562	1	1
B0238.9|B0238.9|B0238.9	997	1570	1.58	0.47	0.649
B0240.5|B0240.5	0	0	NaN	NA	NA
B0240.6|B0240.6	0.28	0	0	1	1
B0244.10|B0244.10|B0244.10	63.4	83.4	1.31	1.41e-14	6.84e-14
B0244.11|B0244.11|B0244.11	0	0.507	Inf	0.477	0.655
B0244.13|B0244.13	3.77	22.2	5.88	1.1e-06	3.34e-06
B0244.14|B0244.14	58.2	401	6.9	5.45e-66	1.15e-64
B0244.4|B0244.4|B0244.4	4.84	9.92	2.05	5.54e-05	0.000144
B0244.5|B0244.5|B0244.5	12.2	29.2	2.4	3.08e-19	1.82e-18
B0244.6|B0244.6|B0244.6	29.9	36.6	1.22	1.57e-07	5.06e-07
B0244.7|B0244.7|B0244.7	10.5	14.1	1.34	0.412	0.583
B0244.9|B0244.9|B0244.9	0.594	0.253	0.426	1	1
B0244.t1|B0244.t1	3.48	20.1	5.77	1.53e-06	4.59e-06
B0244.t2|B0244.t2	0	4.13	Inf	0.0116	0.0231
B0244.t3|B0244.t3	0	5.16	Inf	0.00319	0.0069
B0250.11|B0250.11	18.2	42.9	2.36	0.00958	0.0194
B0250.12|B0250.12	478	397	0.832	6.43e-06	1.82e-05
B0250.14|B0250.14	0	0	NaN	NA	NA
B0250.15|B0250.15	0.399	0.253	0.635	1	1
B0250.16|B0250.16	0.287	1.03	3.6	0.947	1
B0250.17|B0250.17	0.241	0.253	1.05	0.687	0.836
B0250.2|B0250.2|B0250.2	267	191	0.713	0.964	1
B0250.3|B0250.3	2170	1680	0.773	3.81e-62	7.4e-61
B0250.4|B0250.4|B0250.4	674	631	0.935	0.0294	0.0553
B0250.5|B0250.5|B0250.5	843	854	1.01	0.000162	0.000404
B0250.7|B0250.7	59.8	74.1	1.24	0.923	1
B0250.8|B0250.8|B0250.8	6.43	13.1	2.04	0.162	0.261
B0252.1|B0252.1|B0252.1	68.6	78.4	1.14	6.3e-10	2.37e-09
B0252.3|B0252.3|B0252.3a	447	479	1.07	9.82e-08	3.21e-07
B0252.3|B0252.3|B0252.3b	255	266	1.04	0.000198	0.000492
B0252.3|B0252.3|B0252.3c	223	239	1.07	0.000178	0.000443
B0252.5|B0252.5|B0252.5	5.31	5.9	1.11	0.779	0.915
B0252.8|B0252.8|B0252.8	18.5	13.2	0.714	0.0214	0.0411
B0261.1|B0261.1|B0261.1	1850	2310	1.25	8.16e-05	0.00021
B0261.4|B0261.4|B0261.4a	615	624	1.01	0.21	0.329
B0261.4|B0261.4|B0261.4b	549	552	1.01	0.144	0.235
B0261.5|B0261.5|B0261.5	1.07	0.507	0.475	0.946	1
B0261.6|B0261.6|B0261.6a	4	2.81	0.702	0.921	1
B0261.6|B0261.6|B0261.6b	4.73	2.81	0.594	0.481	0.659
B0261.7|B0261.7|B0261.7	717	867	1.21	0.00478	0.0101
B0261.8|B0261.8|B0261.8	561	574	1.02	0.00177	0.00394
B0261.9|B0261.9|B0261.9	5.17	3.06	0.592	0.48	0.658
B0272.3|B0272.3|B0272.3	2680	2620	0.975	1.35e-45	1.78e-44
B0272.4|B0272.4|B0272.4	634	531	0.838	3.03e-05	8.1e-05
B0273.111|B0273.111	0	0	NaN	NA	NA
B0273.112|B0273.112	1.66	2.05	1.23	1	1
B0273.113|B0273.113	0	0.253	Inf	0.519	0.683
B0273.114|B0273.114	0	0	NaN	NA	NA
B0273.1|B0273.1|B0273.1	31.3	28.9	0.923	0.00433	0.00919
B0273.3|B0273.3|B0273.3	191	249	1.31	0.429	0.602
B0280.11|B0280.11|B0280.11	3.62	3.06	0.844	0.741	0.881
B0280.13|B0280.13|B0280.13	336	426	1.27	2.19e-83	6.37e-82
B0280.17|B0280.17|B0280.17	118	115	0.976	0.0578	0.103
B0280.19|B0280.19	0.129	0	0	1	1
B0280.20|B0280.20	0.129	0	0	1	1
B0280.2|B0280.2|B0280.2	40.4	71.4	1.77	4.05e-27	3.18e-26
B0280.6|B0280.6	223	242	1.08	0.207	0.324
B0280.7|B0280.7|B0280.7	149	154	1.04	2.22e-18	1.27e-17
B0280.9|B0280.9|B0280.9	1030	1080	1.05	0.518	0.683
B0281.1|B0281.1|B0281.1	0.316	1.01	3.21	0.356	0.516
B0281.3|B0281.3|B0281.3	15.6	15.5	0.993	0.000152	0.000382
B0281.4|B0281.4|B0281.4	31.6	11	0.348	1.19e-08	4.15e-08
B0281.5|B0281.5|B0281.5a	1350	1030	0.765	1.07e-88	3.36e-87
B0281.5|B0281.5|B0281.5b	928	706	0.761	2.24e-60	4.17e-59
B0281.6|B0281.6|B0281.6	58.7	28.4	0.484	3.62e-05	9.61e-05
B0281.7|B0281.7	0.93	0	0	1	1
B0281.8|B0281.8|B0281.8	1.45	0	0	0.398	0.567
B0284.1|B0284.1|B0284.1	68.4	422	6.18	8.79e-153	5.86e-151
B0284.2|B0284.2|B0284.2	75.8	126	1.66	2.98e-23	2.06e-22
B0284.3|B0284.3|B0284.3	266	203	0.765	0.000673	0.00157
B0284.4|B0284.4|B0284.4	4.11	2.79	0.678	0.427	0.599
B0284.5|B0284.5	5.37	8.61	1.6	0.00202	0.00446
B0284.6|B0284.6	27.3	305	11.2	5.25e-86	1.59e-84
B0284.7|B0284.7	0	0	NaN	NA	NA
B0285.11|B0285.11	14.1	25.8	1.83	0.0216	0.0415
B0285.12|B0285.12	28.7	313	10.9	2.83e-87	8.76e-86
B0285.14|B0285.14	0.112	0	0	1	1
B0285.15|B0285.15	0.863	4.13	4.79	0.72	0.862
B0285.16|B0285.16	1.08	10.8	10	0.00832	0.017
B0285.3|B0285.3|B0285.3	483	774	1.6	2.59e-05	6.97e-05
B0285.4|B0285.4|B0285.4	935	905	0.967	1.08e-14	5.27e-14
B0285.6|B0285.6|B0285.6	32.5	21.8	0.671	0.31	0.461
B0285.t1|B0285.t1	0	7.23	Inf	0.000243	0.000596
B0286.1|B0286.1|B0286.1	479	665	1.39	2.03e-14	9.73e-14
B0286.3|B0286.3|B0286.3	261	279	1.07	8.08e-11	3.2e-10
B0286.8|B0286.8	0.482	0	0	1	1
B0286.9|B0286.9	0.482	0	0	1	1
B0294.1|B0294.1|B0294.1	13.3	12.5	0.935	0.458	0.636
B0294.3|B0294.3|B0294.3	2.01	0.76	0.378	0.376	0.541
B0302.2|B0302.2|B0302.2	21.9	11.8	0.537	0.0118	0.0235
B0302.4|B0302.4|B0302.4	9.07	9.76	1.08	0.0872	0.149
B0302.5|B0302.5|B0302.5	199	177	0.89	1.5e-05	4.12e-05
B0302.7|B0302.7	2.35	0.253	0.108	0.766	0.903
B0303.11|B0303.11|B0303.11	230	331	1.44	1.36e-85	4.07e-84
B0303.14|B0303.14|B0303.14	697	715	1.03	3.81e-09	1.37e-08
B0303.15|B0303.15|B0303.15	614	631	1.03	0.199	0.313
B0303.16|B0303.16|B0303.16	5.7	1.77	0.311	0.616	0.769
B0303.17|B0303.17	0	1.03	Inf	0.522	0.683
B0303.2|B0303.2|B0303.2	557	485	0.872	0.716	0.86
B0303.3|B0303.3|B0303.3	7970	8260	1.04	7.87e-65	1.61e-63
B0303.4|B0303.4|B0303.4	2720	3700	1.36	1.03e-32	9.75e-32
B0303.7|B0303.7|B0303.7a	852	825	0.969	0.532	0.693
B0303.7|B0303.7|B0303.7b	836	803	0.961	0.773	0.909
B0304.10|B0304.10	0.122	0	0	1	1
B0304.2|B0304.2|B0304.2	351	413	1.18	0.00353	0.00759
B0304.4|B0304.4|B0304.4	229	264	1.15	0.00729	0.015
B0310.10|B0310.10	0.652	22.7	34.9	1.73e-08	5.94e-08
B0310.11|B0310.11	2.11	5.65	2.68	0.444	0.619
B0310.12|B0310.12	0.652	22.7	34.9	1.73e-08	5.94e-08
B0310.1|B0310.1|B0310.1a	212	205	0.969	1.13e-09	4.19e-09
B0310.1|B0310.1|B0310.1b	260	258	0.989	2.82e-13	1.28e-12
B0310.2|B0310.2|B0310.2	1590	1800	1.13	1e-07	3.28e-07
B0310.3|B0310.3|B0310.3	15.8	7.66	0.485	0.207	0.324
B0310.6|B0310.6|B0310.6	41.5	32.9	0.794	0.00898	0.0182
B0310.7|B0310.7	1.06	0	0	1	1
B0310.8|B0310.8	0.241	1.03	4.28	0.917	1
B0310.9|B0310.9	1.06	0	0	1	1
B0331.2|B0331.2|B0331.2	17	19.3	1.14	1.83e-07	5.86e-07
B0334.10|B0334.10|B0334.10	9.55	5.63	0.59	0.242	0.371
B0334.12|B0334.12	0.672	6.2	9.23	0.167	0.267
B0334.13|B0334.13|B0334.13	140	98.5	0.704	0.0395	0.0725
B0334.15|B0334.15|B0334.15	4380	4090	0.934	2.5e-52	3.88e-51
B0334.16|B0334.16	0	0	NaN	NA	NA
B0334.17|B0334.17	0.528	1.27	2.4	0.315	0.467
B0334.18|B0334.18	0	8.52	Inf	1.85e-05	5.03e-05
B0334.19|B0334.19	0.597	3.1	5.19	0.773	0.909
B0334.3|B0334.3|B0334.3a	3560	3940	1.11	0.00575	0.012
B0334.3|B0334.3|B0334.3b	1810	1990	1.1	0.0461	0.0834
B0334.4|B0334.4|B0334.4	1020	942	0.92	5.06e-15	2.5e-14
B0334.5|B0334.5|B0334.5	4200	3910	0.932	7.41e-46	9.83e-45
B0334.6|B0334.6|B0334.6	252	211	0.837	1.4e-07	4.54e-07
B0334.9|B0334.9	3.15	2.3	0.731	0.793	0.928
B0336.11|B0336.11|B0336.11a	417	357	0.858	2.55e-09	9.25e-09
B0336.11|B0336.11|B0336.11b	73.5	72.7	0.989	3.66e-06	1.06e-05
B0336.12|B0336.12|B0336.12	1.04	0.253	0.244	0.651	0.803
B0336.13|B0336.13|B0336.13	691	742	1.07	0.000118	0.000298
B0336.14|B0336.14	1.8	0	0	0.151	0.245
B0336.15|B0336.15	1.8	0	0	0.151	0.245
B0336.16|B0336.16	3.66	0.76	0.208	0.376	0.541
B0336.3|B0336.3|B0336.3	3610	3800	1.05	1.52e-19	9.06e-19
B0336.5|B0336.5|B0336.5a	559	666	1.19	0.0876	0.15
B0336.5|B0336.5|B0336.5b	569	669	1.18	0.0167	0.0326
B0336.7|B0336.7|B0336.7a	552	752	1.36	1.26e-06	3.81e-06
B0336.7|B0336.7|B0336.7b	1100	1480	1.35	3.67e-11	1.48e-10
B0344.1|B0344.1	259	218	0.841	0.314	0.466
B0344.3|B0344.3	1.63	16.3	9.97	0.000708	0.00165
B0344.4|B0344.4	1.63	16.3	9.97	0.000708	0.00165
B0344.5|B0344.5	1.75	16.5	9.42	0.000566	0.00133
B0344.t1|B0344.t1	1.52	14.7	9.7	0.00404	0.00862
B0344.t2|B0344.t2	1.52	14.7	9.7	0.00404	0.00862
B0344.t3|B0344.t3	1.52	14.7	9.7	0.00404	0.00862
B0348.1|B0348.1|B0348.1	1.65	0.507	0.308	0.426	0.599
B0348.2|B0348.2|B0348.2	16.6	24.3	1.46	2.35e-08	7.99e-08
B0348.5|B0348.5|B0348.5	89.1	128	1.43	3.19e-33	3.05e-32
B0350.3|B0350.3|B0350.3	0.28	0	0	1	1
B0350.67|B0350.67	0	0	NaN	NA	NA
B0350.68|B0350.68	0.259	0.507	1.96	0.602	0.756
B0350.69|B0350.69	0	0.253	Inf	0.519	0.683
B0350.70|B0350.70	0	0	NaN	NA	NA
B0350.71|B0350.71	0.241	1.79	7.43	0.251	0.382
B0350.72|B0350.72	0	0	NaN	NA	NA
B0350.73|B0350.73	1.41	3.86	2.73	0.637	0.788
B0350.74|B0350.74	3.16	2.3	0.727	0.75	0.889
B0350.75|B0350.75	0	0	NaN	NA	NA
B0350.76|B0350.76	1.83	0.76	0.416	0.451	0.626
B0350.77|B0350.77	0.241	0	0	1	1
B0350.78|B0350.78	0.122	1.54	12.6	0.319	0.473
B0350.79|B0350.79	0.346	0.507	1.46	0.698	0.846
B0350.80|B0350.80	0.241	0.253	1.05	0.687	0.836
B0350.81|B0350.81	0	0.253	Inf	0.519	0.683
B0350.82|B0350.82	0.259	0.507	1.96	0.602	0.756
B0350.83|B0350.83	2.26	0.253	0.112	0.948	1
B0350.84|B0350.84	0	0	NaN	NA	NA
B0350.t1|B0350.t1	0.718	3.61	5.02	0.321	0.473
B0353.1|B0353.1|B0353.1a	429	439	1.02	0.202	0.317
B0353.1|B0353.1|B0353.1b	421	429	1.02	0.273	0.413
B0353.2|B0353.2	0	0	NaN	NA	NA
B0361.11|B0361.11|B0361.11	5.33	4.33	0.811	0.499	0.679
B0361.2|B0361.2|B0361.2a	974	1020	1.04	0.0153	0.0299
B0361.2|B0361.2|B0361.2b	230	209	0.909	0.0596	0.105
B0361.3|B0361.3|B0361.3	2070	2800	1.36	3.34e-22	2.22e-21
B0361.4|B0361.4|B0361.4	48.1	51.7	1.07	7.1e-09	2.51e-08
B0361.6|B0361.6|B0361.6	790	932	1.18	0.367	0.529
B0361.8|B0361.8|B0361.8	1940	2410	1.25	0.0163	0.0319
B0361.9|B0361.9|B0361.9	411	388	0.945	1.66e-21	1.08e-20
B0365.1|B0365.1|B0365.1	655	978	1.49	2.54e-80	7e-79
B0365.2|B0365.2	0.985	0.253	0.257	0.782	0.917
B0365.7|B0365.7|B0365.7	82.6	140	1.69	6.74e-52	1.03e-50
B0365.8|B0365.8	0	0	NaN	NA	NA
B0379.10|B0379.10	0	0	NaN	NA	NA
B0379.11|B0379.11	133	749	5.61	1.79e-102	6.96e-101
B0379.1|B0379.1	128	77.1	0.602	0.272	0.411
B0379.1|B0379.1|B0379.1a	170	97.9	0.574	0.0718	0.125
B0379.2|B0379.2|B0379.2	1.25	0.507	0.407	0.843	0.973
B0379.6|B0379.6|B0379.6	0	0	NaN	NA	NA
B0379.7|B0379.7|B0379.7	2.54	4.09	1.61	0.601	0.755
B0379.8|B0379.8	0.158	0	0	1	1
B0379.9|B0379.9	0	0	NaN	NA	NA
B0391.10|B0391.10|B0391.10	89.8	69.2	0.771	1.35e-05	3.71e-05
B0391.13|B0391.13	0	0	NaN	NA	NA
B0391.1|B0391.1	0	0	NaN	NA	NA
B0391.3|B0391.3|B0391.3	0.129	0	0	1	1
B0391.8|B0391.8	221	197	0.889	0.181	0.287
B0393.10|B0393.10	2.25	0.253	0.112	0.948	1
B0393.11|B0393.11	0	0	NaN	NA	NA
B0393.12|B0393.12	0.371	0.253	0.684	1	1
B0393.13|B0393.13	0.112	0	0	1	1
B0393.14|B0393.14	1.13	0.76	0.673	1	1
B0393.15|B0393.15	0.122	0	0	1	1
B0393.16|B0393.16	0	0	NaN	NA	NA
B0393.3|B0393.3|B0393.3	2490	2790	1.12	8.44e-22	5.54e-21
B0393.4|B0393.4|B0393.4	4.29	7.68	1.79	0.207	0.324
B0393.5|B0393.5|B0393.5	1670	2190	1.32	2.17e-97	7.77e-96
B0393.6|B0393.6|B0393.6	550	732	1.33	3.5e-06	1.02e-05
B0393.7|B0393.7|B0393.7	9.08	11.4	1.26	0.00969	0.0196
B0393.8|B0393.8|B0393.8	332	343	1.03	0.0123	0.0245
B0393.9|B0393.9|B0393.9a	93.2	83.8	0.898	1.91e-05	5.2e-05
B0393.9|B0393.9|B0393.9b	103	92.9	0.903	4.23e-06	1.22e-05
B0395.10|B0395.10	0.504	0.76	1.51	0.662	0.814
B0395.3|B0395.3|B0395.3	3250	3290	1.01	3.42e-10	1.3e-09
B0395.7|B0395.7	0.709	17.5	24.7	4.82e-07	1.5e-06
B0395.8|B0395.8	0	0	NaN	NA	NA
B0395.9|B0395.9	0	0	NaN	NA	NA
B0395.t1|B0395.t1	0.504	0.76	1.51	0.662	0.814
B0399.3|B0399.3	0	0	NaN	NA	NA
B0399.t10|B0399.t10	0.112	0.253	2.26	0.573	0.733
B0399.t11|B0399.t11	0	0	NaN	NA	NA
B0399.t12|B0399.t12	0.122	0	0	1	1
B0399.t13|B0399.t13	0	0.253	Inf	0.519	0.683
B0399.t14|B0399.t14	0	0.253	Inf	0.519	0.683
B0399.t15|B0399.t15	0	0	NaN	NA	NA
B0399.t16|B0399.t16	0	0	NaN	NA	NA
B0399.t1|B0399.t1	0	0	NaN	NA	NA
B0399.t2|B0399.t2	0	0	NaN	NA	NA
B0399.t3|B0399.t3	0	0	NaN	NA	NA
B0399.t4|B0399.t4	0	0	NaN	NA	NA
B0399.t5|B0399.t5	0	1.03	Inf	0.522	0.683
B0399.t6|B0399.t6	0	0	NaN	NA	NA
B0399.t7|B0399.t7	0	1.03	Inf	0.522	0.683
B0399.t8|B0399.t8	0.112	0	0	1	1
B0399.t9|B0399.t9	0	0.253	Inf	0.519	0.683
B0403.10|B0403.10	0	0	NaN	NA	NA
B0403.11|B0403.11	0.528	1.29	2.43	0.956	1
B0403.12|B0403.12	0.122	0.253	2.08	0.576	0.734
B0403.13|B0403.13	0.122	0.507	4.15	0.522	0.683
B0403.14|B0403.14	0	0	NaN	NA	NA
B0403.3|B0403.3|B0403.3	15.9	26.1	1.64	5.52e-09	1.96e-08
B0403.5|B0403.5|B0403.5	511	525	1.03	3.07e-44	3.92e-43
B0403.6|B0403.6|B0403.6	32.6	35	1.07	4.73e-07	1.48e-06
B0403.7|B0403.7	0	0	NaN	NA	NA
B0403.8|B0403.8	0	0	NaN	NA	NA
B0403.9|B0403.9	1.94	2.53	1.31	0.307	0.456
B0410.1|B0410.1|B0410.1	2.31	1.27	0.548	1	1
B0410.3|B0410.3|B0410.3	267	220	0.824	9.97e-05	0.000254
B0410.4|B0410.4	0.241	0	0	1	1
B0412.3|B0412.3|B0412.3	3720	4490	1.21	0.133	0.219
B0412.6|B0412.6	1.16	1.27	1.09	0.675	0.826
B0412.7|B0412.7	2.49	3.33	1.34	0.504	0.683
B0414.10|B0414.10	0.129	0	0	1	1
B0414.11|B0414.11	0	0	NaN	NA	NA
B0414.12|B0414.12	0	0	NaN	NA	NA
B0416.1|B0416.1|B0416.1	921	938	1.02	8.74e-24	6.17e-23
B0416.2|B0416.2|B0416.2	0.392	0	0	1	1
B0416.3|B0416.3|B0416.3	18.5	29.4	1.59	3.95e-11	1.59e-10
B0416.4|B0416.4|B0416.4	338	300	0.887	2.09e-17	1.14e-16
B0416.5|B0416.5|B0416.5a	3650	3280	0.899	3.93e-90	1.26e-88
B0416.5|B0416.5|B0416.5b	2520	2330	0.924	6.57e-58	1.15e-56
B0416.7|B0416.7|B0416.7a	6.37	8.61	1.35	0.00267	0.00582
B0416.7|B0416.7|B0416.7b	7.49	8.36	1.12	0.00722	0.0149
B0416.8|B0416.8	0.828	0.76	0.917	1	1
B0416.9|B0416.9	0.846	1.77	2.1	0.125	0.207
B0432.10|B0432.10|B0432.10	1100	1090	0.988	3.78e-20	2.33e-19
B0432.11|B0432.11|B0432.11	0.363	0.253	0.697	1	1
B0432.13|B0432.13|B0432.13	1710	1860	1.08	6.61e-08	2.18e-07
B0432.14|B0432.14|B0432.14	27	31.2	1.16	4.56e-06	1.31e-05
B0432.16|B0432.16	0.129	3.1	24	0.144	0.235
B0432.17|B0432.17	0.122	1.03	8.46	0.718	0.861
B0432.18|B0432.18	0.129	3.1	24	0.144	0.235
B0432.19|B0432.19	0.528	2.07	3.91	1	1
B0432.1|B0432.1|B0432.1	25.7	17.2	0.669	0.000203	0.000502
B0432.6|B0432.6|B0432.6	478	526	1.1	0.103	0.173
B0432.7|B0432.7|B0432.7	651	857	1.32	1.09e-21	7.14e-21
B0432.8|B0432.8|B0432.8	210	291	1.39	0.231	0.357
B0432.9|B0432.9|B0432.9	544	673	1.24	0.099	0.167
B0454.12|B0454.12	0	0	NaN	NA	NA
B0454.13|B0454.13	0.129	0	0	1	1
B0454.14|B0454.14	0	0	NaN	NA	NA
B0454.15|B0454.15	0	0	NaN	NA	NA
B0454.16|B0454.16	0	0	NaN	NA	NA
B0454.17|B0454.17	0	0	NaN	NA	NA
B0454.18|B0454.18	0.597	1.27	2.12	0.377	0.542
B0454.19|B0454.19	0	0	NaN	NA	NA
B0454.20|B0454.20	0	0	NaN	NA	NA
B0454.21|B0454.21	0	0	NaN	NA	NA
B0454.22|B0454.22	0	0	NaN	NA	NA
B0454.23|B0454.23	0	0	NaN	NA	NA
B0454.24|B0454.24	0	0	NaN	NA	NA
B0454.25|B0454.25	0	0	NaN	NA	NA
B0454.5|B0454.5|B0454.5	18.6	18.4	0.987	0.258	0.392
B0454.6|B0454.6|B0454.6	242	344	1.42	4.47e-59	8.1e-58
B0454.8|B0454.8|B0454.8	139	99.1	0.711	0.136	0.224
B0454.9|B0454.9|B0454.9	727	693	0.952	2.08e-06	6.18e-06
B0457.10|B0457.10	0.122	0	0	1	1
B0457.11|B0457.11	0	0.253	Inf	0.519	0.683
B0457.12|B0457.12	0.112	0.76	6.79	0.448	0.622
B0457.13|B0457.13	0	0	NaN	NA	NA
B0457.14|B0457.14	0.112	0	0	1	1
B0457.15|B0457.15	0.122	0	0	1	1
B0457.16|B0457.16	12.8	6.63	0.518	0.229	0.354
B0457.17|B0457.17	0	0.253	Inf	0.519	0.683
B0457.18|B0457.18	0.363	0.253	0.697	1	1
B0457.19|B0457.19	11.2	14.5	1.29	0.245	0.375
B0457.2|B0457.2|B0457.2	158	130	0.821	0.159	0.256
B0457.3|B0457.3	0.363	0.76	2.09	0.574	0.734
B0457.4|B0457.4|B0457.4	0.774	3.82	4.94	0.00125	0.00284
B0457.6|B0457.6|B0457.6	202	148	0.733	0.86	0.989
B0457.8|B0457.8	0	0	NaN	NA	NA
B0457.9|B0457.9	0.122	0.253	2.08	0.576	0.734
B0462.1|B0462.1|B0462.1	42.5	51.2	1.2	5.88e-07	1.82e-06
B0462.4|B0462.4|B0462.4	88	64	0.727	0.465	0.644
B0462.5|B0462.5|B0462.5	5	3.29	0.659	0.747	0.886
B0464.2|B0464.2|B0464.2a	3540	3890	1.1	8.7e-25	6.33e-24
B0464.2|B0464.2|B0464.2b	381	466	1.22	0.00673	0.0139
B0464.2|B0464.2|B0464.2c	3700	4060	1.1	3.65e-25	2.7e-24
B0464.2|B0464.2|B0464.2d	339	417	1.23	0.00575	0.012
B0464.6|B0464.6|B0464.6	5890	7010	1.19	2.37e-18	1.35e-17
B0464.9|B0464.9|B0464.9	645	881	1.37	0.0787	0.136
B0478.23|B0478.23	0.112	0	0	1	1
B0478.24|B0478.24	0	0	NaN	NA	NA
B0478.25|B0478.25	0	0	NaN	NA	NA
B0478.26|B0478.26	0.112	0	0	1	1
B0478.3|B0478.3|B0478.3	46	27.6	0.6	0.394	0.563
B0491.10|B0491.10	0.122	0.507	4.15	0.522	0.683
B0491.11|B0491.11	0.112	6.96	62.1	0.000139	0.00035
B0491.1|B0491.1|B0491.1	660	605	0.918	0.448	0.623
B0491.5|B0491.5|B0491.5	7100	6540	0.922	1.36e-130	7.1e-129
B0491.6|B0491.6|B0491.6a	1010	1050	1.04	0.000918	0.00212
B0491.6|B0491.6|B0491.6b	984	1020	1.04	0.00388	0.00831
B0491.7|B0491.7|B0491.7	829	925	1.12	0.24	0.368
B0491.9|B0491.9	0.465	0	0	1	1
B0491.t1|B0491.t1	0.112	6.96	62.1	0.000139	0.00035
B0491.t2|B0491.t2	0.112	6.96	62.1	0.000139	0.00035
B0495.11|B0495.11	0.122	0	0	1	1
B0495.12|B0495.12	0	0	NaN	NA	NA
B0495.13|B0495.13	0.112	0.253	2.26	0.573	0.733
B0495.14|B0495.14	0	0	NaN	NA	NA
B0495.15|B0495.15	2.54	3.8	1.5	0.0961	0.163
B0495.16|B0495.16	0.241	0.253	1.05	0.687	0.836
B0495.17|B0495.17	0	0.253	Inf	0.519	0.683
B0495.18|B0495.18	0.129	1.03	7.99	0.721	0.863
B0495.19|B0495.19	1.77	1.27	0.715	0.55	0.712
B0495.20|B0495.20	0.287	0.507	1.76	0.607	0.759
B0495.21|B0495.21	0.112	0.507	4.52	0.523	0.683
B0495.22|B0495.22	0.112	0.253	2.26	0.573	0.733
B0495.2|B0495.2|B0495.2	1730	2180	1.26	0.0529	0.0946
B0495.5|B0495.5|B0495.5	1460	1750	1.2	3.14e-11	1.27e-10
B0495.6|B0495.6|B0495.6	250	312	1.25	0.295	0.443
B0495.7|B0495.7|B0495.7	9290	10000	1.08	2.17e-31	1.96e-30
B0495.8|B0495.8|B0495.8a	2370	2530	1.07	2.21e-11	9.03e-11
B0495.8|B0495.8|B0495.8b	1250	1430	1.15	0.00677	0.014
B0495.9|B0495.9|B0495.9	640	612	0.956	0.000395	0.000949
B0496.11|B0496.11|B0496.11	0.54	1.77	3.29	0.0764	0.132
B0496.12|B0496.12	0	0	NaN	NA	NA
B0496.13|B0496.13	0.653	1.01	1.55	0.551	0.713
B0496.14|B0496.14	0.633	0.507	0.8	0.989	1
B0496.15|B0496.15	0	0	NaN	NA	NA
B0496.16|B0496.16	0.56	1.29	2.3	1	1
B0496.17|B0496.17	1.44	0.253	0.175	0.948	1
B0496.18|B0496.18	0.863	2.07	2.39	1	1
B0496.19|B0496.19	0.112	0	0	1	1
B0496.1|B0496.1|B0496.1	7.49	2.79	0.372	0.0295	0.0555
B0496.2|B0496.2|B0496.2	87.5	93.6	1.07	0.0234	0.0446
B0496.6|B0496.6|B0496.6	4.23	4.05	0.958	0.351	0.51
B0507.10|B0507.10|B0507.10	25.9	93.2	3.59	2.05e-69	4.62e-68
B0507.13|B0507.13	0	0	NaN	NA	NA
B0507.14|B0507.14	1.15	0.76	0.661	0.996	1
B0507.1|B0507.1|B0507.1	830	926	1.12	7.04e-26	5.29e-25
B0507.2|B0507.2|B0507.2	605	870	1.44	7.93e-45	1.02e-43
B0507.3|B0507.3|B0507.3a	302	281	0.93	0.308	0.458
B0507.3|B0507.3|B0507.3b	289	266	0.92	0.337	0.492
B0507.4|B0507.4|B0507.4	0.531	3.29	6.2	7.82e-05	0.000201
B0507.5|B0507.5|B0507.5	0.27	1.79	6.64	0.239	0.367
B0507.6|B0507.6|B0507.6	12.4	28.7	2.32	4.58e-18	2.57e-17
B0507.7|B0507.7|B0507.7	10.7	23.4	2.18	5.41e-08	1.8e-07
B0507.8|B0507.8|B0507.8	17.2	51.2	2.98	3.14e-29	2.63e-28
B0507.9|B0507.9|B0507.9	3.44	5.32	1.55	0.0132	0.0262
B0511.11|B0511.11|B0511.11	88.2	74.7	0.847	0.0472	0.0852
B0511.12|B0511.12|B0511.12	3030	3480	1.15	0.000904	0.00209
B0511.13|B0511.13|B0511.13	841	804	0.956	1.57e-15	7.92e-15
B0511.14|B0511.14|B0511.14a	755	1060	1.41	0.00645	0.0134
B0511.14|B0511.14|B0511.14b	591	820	1.39	0.0401	0.0734
B0511.15|B0511.15	0.346	1.54	4.45	0.524	0.684
B0511.16|B0511.16	3.11	14.1	4.52	2.46e-07	7.83e-07
B0511.2|B0511.2|B0511.2	121	142	1.17	0.544	0.706
B0511.6|B0511.6|B0511.6	6290	5970	0.949	1.67e-65	3.48e-64
B0511.7|B0511.7|B0511.7	972	980	1.01	2.13e-16	1.12e-15
B0513.11|B0513.11	1.09	0	0	1	1
B0513.12|B0513.12	121	109	0.904	0.0331	0.0616
B0513.2|B0513.2|B0513.2a	1590	1700	1.07	8.07e-16	4.13e-15
B0513.2|B0513.2|B0513.2b	1430	1520	1.07	8.46e-15	4.14e-14
B0513.4|B0513.4|B0513.4a	13.9	11.7	0.842	0.801	0.936
B0513.4|B0513.4|B0513.4b	3.24	3.84	1.19	0.632	0.784
B0513.5|B0513.5|B0513.5	408	476	1.17	2.45e-56	4.16e-55
B0513.6|B0513.6|B0513.6	30.4	25.4	0.833	0.198	0.31
B0513.7|B0513.7	289	446	1.54	1.88e-05	5.12e-05
B0513.9|B0513.9|B0513.9a	34.8	20	0.574	1	1
B0513.9|B0513.9|B0513.9b	77.5	43.3	0.559	0.751	0.889
B0513.t1|B0513.t1	0.112	0	0	1	1
B0523.6|B0523.6	0	2.32	Inf	0.106	0.177
B0524.2|B0524.2|B0524.2	1.33	0.507	0.381	1	1
B0524.3|B0524.3|B0524.3	5.52	9.78	1.77	0.632	0.783
B0524.4|B0524.4|B0524.4	1.87	4.62	2.48	0.385	0.552
B0524.5|B0524.5|B0524.5	0.661	0.507	0.767	1	1
B0524.6|B0524.6|B0524.6	397	458	1.15	0.0081	0.0166
B0524.7|B0524.7	0.244	1.29	5.27	0.628	0.781
B0524.8|B0524.8	0.244	1.29	5.27	0.628	0.781
B0524.9|B0524.9	0	0	NaN	NA	NA
B0545.4|B0545.4|B0545.4	20.6	17.5	0.849	0.0398	0.073
B0546.2|B0546.2|B0546.2	2640	2780	1.06	5.94e-11	2.37e-10
B0546.3|B0546.3|B0546.3	474	551	1.16	2.56e-14	1.22e-13
B0546.4|B0546.4|B0546.4a	571	539	0.944	0.483	0.661
B0546.4|B0546.4|B0546.4b	548	509	0.929	0.979	1
B0546.5|B0546.5|B0546.5	10.6	10.8	1.02	0.953	1
B0547.2|B0547.2|B0547.2	0	1.03	Inf	0.522	0.683
B0547.34|B0547.34	0	0	NaN	NA	NA
B0554.1|B0554.1|B0554.1	1.88	1.79	0.956	0.864	0.991
B0554.2|B0554.2|B0554.2	1.83	2.07	1.13	0.28	0.422
B0554.3|B0554.3|B0554.3	0	0	NaN	NA	NA
B0554.4|B0554.4|B0554.4	2.06	11.7	5.67	9.43e-10	3.51e-09
B0554.5|B0554.5|B0554.5	2.99	5.32	1.78	0.00694	0.0143
B0554.7|B0554.7|B0554.7	27.5	24.4	0.886	0.103	0.173
B0563.10|B0563.10|B0563.10	1.85	1.03	0.558	0.485	0.663
B0563.12|B0563.12	0	0.507	Inf	0.477	0.655
B0563.13|B0563.13	0	0.507	Inf	0.477	0.655
B0563.14|B0563.14	0.112	0.507	4.52	0.523	0.683
B0563.15|B0563.15	0.259	0	0	1	1
B0563.16|B0563.16	0.112	0.253	2.26	0.573	0.733
B0563.17|B0563.17	0.112	0.507	4.52	0.523	0.683
B0563.1|B0563.1|B0563.1	149	90.6	0.607	1.05e-10	4.12e-10
B0563.5|B0563.5|B0563.5	3.02	5.57	1.84	0.00178	0.00396
B0563.6|B0563.6|B0563.6a	152	204	1.34	1.57e-33	1.52e-32
B0563.6|B0563.6|B0563.6b	274	375	1.37	2.45e-61	4.67e-60
B0563.6|B0563.6|B0563.6c	133	179	1.34	1.64e-29	1.38e-28
B0563.7|B0563.7|B0563.7	25.5	37	1.45	2.26e-12	9.75e-12
B0563.8|B0563.8|B0563.8	79.6	44.3	0.557	6.83e-07	2.1e-06
B0563.9|B0563.9|B0563.9	3.13	0.76	0.243	0.865	0.991
B0564.11|B0564.11|B0564.11	1070	1060	0.989	0.0255	0.0484
B0564.2|B0564.2|B0564.2	211	194	0.921	0.0461	0.0834
B0564.3|B0564.3|B0564.3	178	288	1.61	4.16e-68	9.11e-67
B0564.4|B0564.4|B0564.4	18.9	26.7	1.41	9.09e-05	0.000233
B0564.6|B0564.6|B0564.6a	312	291	0.933	1.18e-14	5.73e-14
B0564.6|B0564.6|B0564.6b	307	289	0.94	7.67e-15	3.76e-14
B0564.7|B0564.7|B0564.7	1560	1540	0.988	0.748	0.887
B0564.9|B0564.9|B0564.9	312	291	0.933	1.18e-14	5.73e-14
BE0003N10.1|BE0003N10.1|BE0003N10.1	430	551	1.28	1.18e-06	3.57e-06
BE0003N10.3|BE0003N10.3|BE0003N10.3	878	898	1.02	0.000251	0.000614
BE0003N10.4|BE0003N10.4	1.27	10.3	8.11	0.00654	0.0135
BE0003N10.5|BE0003N10.5	1.27	10.3	8.11	0.00654	0.0135
BE0003N10.t1|BE0003N10.t1	0	0	NaN	NA	NA
BE0003N10.t2|BE0003N10.t2	0.259	2.32	8.97	0.32	0.473
BE0003N10.t3|BE0003N10.t3	0	0	NaN	NA	NA
BE0003N10.t4|BE0003N10.t4	0	2.07	Inf	0.237	0.365
BE0003N10.t5|BE0003N10.t5	0.129	0	0	1	1
BE0003N10.t6|BE0003N10.t6	0	0	NaN	NA	NA
BE10.1|BE10.1|BE10.1	0.884	0.507	0.573	1	1
BE10.3|BE10.3|BE10.3	725	826	1.14	7.28e-14	3.39e-13
BE10.4|BE10.4|BE10.4	72.5	69.8	0.964	0.297	0.444
BE10.5|BE10.5|BE10.5	21.6	23.9	1.11	0.316	0.469
BE10.6|BE10.6	1.5	26.6	17.8	9.36e-09	3.28e-08
BE10.7|BE10.7	0.224	0.507	2.26	0.596	0.751
C01A2.10|C01A2.10	8.56	182	21.3	5.6e-59	1.01e-57
C01A2.1|C01A2.1|C01A2.1	494	295	0.596	3.26e-42	3.95e-41
C01A2.2|C01A2.2|C01A2.2a	444	368	0.829	0.736	0.876
C01A2.2|C01A2.2|C01A2.2b	130	119	0.916	1	1
C01A2.3|C01A2.3|C01A2.3	1370	1220	0.897	0.739	0.879
C01A2.4|C01A2.4|C01A2.4	1050	1120	1.07	0.0293	0.0551
C01A2.5|C01A2.5|C01A2.5	1570	1530	0.975	6.15e-28	4.96e-27
C01A2.6|C01A2.6|C01A2.6	3.12	1.52	0.487	0.984	1
C01A2.8|C01A2.8	0	0	NaN	NA	NA
C01A2.9|C01A2.9|C01A2.9	3.9	2.05	0.524	0.297	0.445
C01B10.10|C01B10.10|C01B10.10	455	420	0.922	1.33e-05	3.66e-05
C01B10.11|C01B10.11|C01B10.11	1600	1320	0.824	0.0293	0.0552
C01B10.3|C01B10.3|C01B10.3	65.8	67.5	1.02	1.44e-07	4.67e-07
C01B10.44|C01B10.44|C01B10.44	0.574	1.54	2.68	0.628	0.781
C01B10.45|C01B10.45	3.74	3.33	0.89	0.692	0.841
C01B10.46|C01B10.46	5.06	4.37	0.862	0.373	0.537
C01B10.47|C01B10.47	9.07	9.72	1.07	0.899	1
C01B10.4|C01B10.4|C01B10.4	118	102	0.87	0.2	0.314
C01B10.6|C01B10.6|C01B10.6a	1110	1160	1.04	6.6e-86	1.99e-84
C01B10.6|C01B10.6|C01B10.6b	573	584	1.02	6.93e-42	8.35e-41
C01B10.7|C01B10.7|C01B10.7	0.158	0.253	1.6	0.591	0.746
C01B10.8|C01B10.8|C01B10.8	1470	1880	1.28	0.000445	0.00106
C01B10.9|C01B10.9|C01B10.9	861	1060	1.23	0.0156	0.0306
C01B12.10|C01B12.10	0.112	0	0	1	1
C01B12.2|C01B12.2|C01B12.2	815	879	1.08	4.35e-08	1.46e-07
C01B12.3|C01B12.3|C01B12.3	573	571	0.998	7.34e-05	0.000189
C01B12.4|C01B12.4|C01B12.4	43.7	53.5	1.23	1.78e-08	6.1e-08
C01B12.5|C01B12.5|C01B12.5	28.6	24.6	0.858	0.0263	0.0498
C01B12.8|C01B12.8|C01B12.8	408	490	1.2	0.89	1
C01B12.9|C01B12.9	128	135	1.06	0.41	0.581
C01B4.2|C01B4.2	0.287	1.03	3.6	0.947	1
C01B4.6|C01B4.6|C01B4.6	324	599	1.85	3.65e-29	3.06e-28
C01B4.7|C01B4.7|C01B4.7	124	304	2.45	4.61e-112	1.99e-110
C01B4.8|C01B4.8|C01B4.8	27.7	33.5	1.21	0.0911	0.155
C01B4.9|C01B4.9|C01B4.9	299	713	2.38	4.43e-182	3.78e-180
C01B7.10|C01B7.10	0.409	0.76	1.86	0.569	0.733
C01B7.11|C01B7.11	0.968	3.35	3.46	0.864	0.991
C01B7.12|C01B7.12	0	0	NaN	NA	NA
C01B7.13|C01B7.13	0	0	NaN	NA	NA
C01B7.14|C01B7.14	0.948	0.507	0.535	0.978	1
C01B7.15|C01B7.15	0	0	NaN	NA	NA
C01B7.16|C01B7.16	0	0	NaN	NA	NA
C01B7.3|C01B7.3|C01B7.3	1	0.253	0.252	0.673	0.825
C01B7.5|C01B7.5|C01B7.5	26.5	31	1.17	3.47e-06	1.01e-05
C01B7.7|C01B7.7|C01B7.7	2.67	2.03	0.759	1	1
C01B7.8|C01B7.8	0.5	2.83	5.65	0.144	0.235
C01B7.9|C01B7.9	0.597	0.253	0.424	1	1
C01B9.1|C01B9.1|C01B9.1a	149	339	2.28	6.83e-194	6.38e-192
C01B9.1|C01B9.1|C01B9.1b	158	354	2.24	1.92e-198	1.85e-196
C01B9.3|C01B9.3	1.75	2.05	1.17	1	1
C01B9.4|C01B9.4|C01B9.4	7.13	5.67	0.796	0.175	0.279
C01B9.5|C01B9.5	6.34	4.31	0.679	0.866	0.992
C01B9.6|C01B9.6	0	0	NaN	NA	NA
C01C10.2|C01C10.2|C01C10.2a	112	111	0.986	5.41e-07	1.68e-06
C01C10.2|C01C10.2|C01C10.2b	165	163	0.986	4.25e-09	1.52e-08
C01C10.5|C01C10.5	0	0	NaN	NA	NA
C01C4.2|C01C4.2|C01C4.2	2.37	3.04	1.28	0.193	0.305
C01C4.3|C01C4.3|C01C4.3a	104	136	1.32	1.86e-42	2.27e-41
C01C4.3|C01C4.3|C01C4.3b	117	154	1.32	6.83e-44	8.64e-43
C01C4.4|C01C4.4	0	0	NaN	NA	NA
C01C4.5|C01C4.5	0.122	3.1	25.4	0.145	0.236
C01C4.6|C01C4.6	0	0	NaN	NA	NA
C01C4.7|C01C4.7	0	0	NaN	NA	NA
C01F1.1|C01F1.1|C01F1.1	1410	1930	1.37	0.000435	0.00104
C01F1.3|C01F1.3|C01F1.3a	1740	1860	1.07	0.472	0.652
C01F1.3|C01F1.3|C01F1.3b	473	450	0.95	0.0372	0.0687
C01F1.4|C01F1.4|C01F1.4	56.9	62.4	1.1	0.000144	0.000363
C01F1.5|C01F1.5|C01F1.5	183	225	1.23	8.26e-26	6.2e-25
C01F1.6|C01F1.6|C01F1.6	802	1050	1.3	8.2e-05	0.000211
C01F1.7|C01F1.7	0.129	0	0	1	1
C01F1.8|C01F1.8	0.734	0.253	0.345	1	1
C01F4.4|C01F4.4	0	0	NaN	NA	NA
C01F4.5|C01F4.5	0	0	NaN	NA	NA
C01F4.6|C01F4.6	0.234	0	0	1	1
C01F4.7|C01F4.7	0.251	0.253	1.01	0.694	0.842
C01F4.8|C01F4.8	0	0	NaN	NA	NA
C01F4.9|C01F4.9	0.112	0	0	1	1
C01F6.12|C01F6.12	0	0.253	Inf	0.519	0.683
C01F6.13|C01F6.13	0	0.76	Inf	0.401	0.57
C01F6.2|C01F6.2|C01F6.2	25.4	36.4	1.43	0.416	0.588
C01F6.9|C01F6.9|C01F6.9	556	533	0.958	1.56e-09	5.72e-09
C01G10.10|C01G10.10|C01G10.10	619	692	1.12	0.02	0.0386
C01G10.13|C01G10.13	9.48	7.68	0.81	0.182	0.289
C01G10.14|C01G10.14|C01G10.14	1.86	2.57	1.38	0.864	0.991
C01G10.15|C01G10.15|C01G10.15	3.6	3.06	0.85	0.977	1
C01G10.16|C01G10.16|C01G10.16	2.5	7.66	3.07	0.000596	0.0014
C01G10.17|C01G10.17|C01G10.17	0.259	0.507	1.96	0.602	0.756
C01G10.18|C01G10.18|C01G10.18	0	0	NaN	NA	NA
C01G10.19|C01G10.19	0.234	0	0	1	1
C01G10.1|C01G10.1|C01G10.1	15.2	17.7	1.16	0.44	0.615
C01G10.4|C01G10.4|C01G10.4	0.603	1.27	2.1	0.28	0.422
C01G10.5|C01G10.5|C01G10.5	1.64	1.54	0.937	0.865	0.991
C01G10.6|C01G10.6|C01G10.6	1	0.76	0.756	1	1
C01G10.7|C01G10.7|C01G10.7	434	409	0.941	0.0966	0.164
C01G10.8|C01G10.8|C01G10.8	5490	4430	0.808	3.52e-175	2.8e-173
C01G10.9|C01G10.9|C01G10.9	515	490	0.951	0.0383	0.0705
C01G12.12|C01G12.12	138	146	1.06	0.962	1
C01G12.13|C01G12.13|C01G12.13	4.67	2.79	0.596	0.923	1
C01G12.14|C01G12.14	1.07	1.52	1.42	0.422	0.594
C01G12.15|C01G12.15	0.112	1.03	9.23	0.714	0.858
C01G12.1|C01G12.1|C01G12.1	767	741	0.967	1.35e-11	5.56e-11
C01G12.3|C01G12.3|C01G12.3	343	288	0.839	5.28e-22	3.5e-21
C01G12.5|C01G12.5|C01G12.5	43	62.7	1.46	2.88e-11	1.17e-10
C01G12.7|C01G12.7|C01G12.7	43.7	58.9	1.35	2.08e-11	8.5e-11
C01G12.9|C01G12.9|C01G12.9	2.96	0.507	0.171	0.18	0.287
C01G5.3|C01G5.3|C01G5.3	72.5	113	1.55	0.318	0.471
C01G5.4|C01G5.4|C01G5.4	14.1	4.11	0.292	3.88e-10	1.48e-09
C01G5.5|C01G5.5|C01G5.5	377	361	0.956	1.43e-05	3.94e-05
C01G5.6|C01G5.6|C01G5.6	1380	1440	1.05	3.02e-08	1.02e-07
C01G5.7|C01G5.7|C01G5.7	35	35.9	1.03	0.0125	0.0248
C01G5.9|C01G5.9|C01G5.9	298	239	0.801	0.603	0.757
C01G6.10|C01G6.10	8.4	7.72	0.919	0.341	0.498
C01G6.13|C01G6.13	2.33	3.08	1.32	0.886	1
C01G6.2|C01G6.2|C01G6.2	96.6	45	0.466	1.81e-11	7.42e-11
C01G6.3|C01G6.3|C01G6.3	13100	10400	0.794	0	0
C01G6.4|C01G6.4|C01G6.4	1630	1600	0.985	1.69e-15	8.55e-15
C01G6.5|C01G6.5|C01G6.5	3890	4480	1.15	0.0384	0.0706
C01G6.9|C01G6.9|C01G6.9	667	532	0.797	3.48e-06	1.01e-05
C01G8.10|C01G8.10	0	0	NaN	NA	NA
C01G8.1|C01G8.1|C01G8.1a	306	559	1.83	0.0204	0.0392
C01G8.1|C01G8.1|C01G8.1b	320	603	1.88	0.0897	0.153
C01G8.6|C01G8.6|C01G8.6	180	217	1.2	0.376	0.54
C01H6.10|C01H6.10	0	0	NaN	NA	NA
C01H6.11|C01H6.11	3.9	7.7	1.97	0.42	0.593
C01H6.2|C01H6.2|C01H6.2	262	356	1.36	6.62e-67	1.41e-65
C01H6.3|C01H6.3|C01H6.3	60.5	56.7	0.936	0.0149	0.0292
C01H6.4|C01H6.4|C01H6.4	104	142	1.36	7.01e-31	6.21e-30
C01H6.6|C01H6.6|C01H6.6	344	321	0.934	0.041	0.075
C01H6.8|C01H6.8|C01H6.8a	379	327	0.864	0.895	1
C01H6.8|C01H6.8|C01H6.8b	253	227	0.899	0.761	0.899
C01H6.9|C01H6.9|C01H6.9	1620	1940	1.2	0.023	0.044
C02B10.2|C02B10.2|C02B10.2	474	534	1.13	0.716	0.861
C02B10.3|C02B10.3|C02B10.3	1960	2240	1.14	7.37e-14	3.43e-13
C02B10.4|C02B10.4|C02B10.4	3050	2690	0.882	7.12e-99	2.61e-97
C02B10.5|C02B10.5|C02B10.5	4020	4290	1.07	5.2e-32	4.79e-31
C02B10.6|C02B10.6|C02B10.6	2.76	2.03	0.734	0.956	1
C02B10.71|C02B10.71	0	0	NaN	NA	NA
C02B10.72|C02B10.72	0.251	0	0	1	1
C02B10.73|C02B10.73	0	0	NaN	NA	NA
C02B10.74|C02B10.74	0	0	NaN	NA	NA
C02B4.10|C02B4.10	0	0	NaN	NA	NA
C02B4.11|C02B4.11	0	0	NaN	NA	NA
C02B4.12|C02B4.12	0	0	NaN	NA	NA
C02B4.13|C02B4.13	0	0	NaN	NA	NA
C02B4.14|C02B4.14	0	0	NaN	NA	NA
C02B4.3|C02B4.3|C02B4.3	0	0	NaN	NA	NA
C02B4.4|C02B4.4|C02B4.4	78	76.7	0.984	2.76e-05	7.4e-05
C02B4.5|C02B4.5	0	0	NaN	NA	NA
C02B4.6|C02B4.6	0	0	NaN	NA	NA
C02B4.7|C02B4.7	0	0	NaN	NA	NA
C02B4.8|C02B4.8	3.16	5.9	1.87	0.36	0.521
C02B4.9|C02B4.9	0	0	NaN	NA	NA
C02B4.t1|C02B4.t1	0	0	NaN	NA	NA
C02B4.t2|C02B4.t2	0.129	1.03	7.99	0.721	0.863
C02B8.11|C02B8.11	0	0	NaN	NA	NA
C02B8.1|C02B8.1|C02B8.1	81.8	61.9	0.757	0.0871	0.149
C02B8.3|C02B8.3|C02B8.3	19.2	16.1	0.836	0.513	0.683
C02B8.5|C02B8.5|C02B8.5	10.4	14	1.35	0.000271	0.000662
C02B8.6|C02B8.6|C02B8.6	782	990	1.27	7.95e-07	2.43e-06
C02B8.7|C02B8.7|C02B8.7	0.129	0	0	1	1
C02C2.4|C02C2.4|C02C2.4	54.9	22.4	0.407	3.88e-05	0.000103
C02C2.5|C02C2.5|C02C2.5	135	109	0.803	5.57e-07	1.72e-06
C02C6.10|C02C6.10	0	0	NaN	NA	NA
C02C6.11|C02C6.11	0.224	0.507	2.26	0.596	0.751
C02C6.12|C02C6.12	0.158	0	0	1	1
C02C6.3|C02C6.3|C02C6.3a	840	791	0.942	2.59e-06	7.63e-06
C02C6.3|C02C6.3|C02C6.3b	474	469	0.991	0.000338	0.000817
C02C6.3|C02C6.3|C02C6.3c	84.5	98.1	1.16	0.0148	0.0291
C02C6.3|C02C6.3|C02C6.3d	303	329	1.09	7.86e-06	2.21e-05
C02C6.4|C02C6.4	0	0.253	Inf	0.519	0.683
C02C6.5|C02C6.5	0.382	0.76	1.99	0.572	0.733
C02C6.6|C02C6.6	0.112	0	0	1	1
C02C6.7|C02C6.7	0	0	NaN	NA	NA
C02C6.8|C02C6.8	0.224	0	0	1	1
C02C6.9|C02C6.9	0.158	0	0	1	1
C02D4.10|C02D4.10	0.122	0	0	1	1
C02D4.11|C02D4.11	0.488	0	0	1	1
C02D4.12|C02D4.12	5.61	8.38	1.49	0.0269	0.0508
C02D4.13|C02D4.13	0.122	0	0	1	1
C02D4.14|C02D4.14	0	0.253	Inf	0.519	0.683
C02D4.15|C02D4.15	45.2	339	7.51	8.56e-65	1.75e-63
C02D4.16|C02D4.16	45.2	340	7.52	3.98e-65	8.17e-64
C02D4.5|C02D4.5	1.22	4.13	3.38	1	1
C02D4.6|C02D4.6	0	0	NaN	NA	NA
C02D4.7|C02D4.7	0	0	NaN	NA	NA
C02D4.8|C02D4.8	0.259	0.253	0.98	0.7	0.847
C02D4.9|C02D4.9	0.112	0	0	1	1
C02D4.t1|C02D4.t1	1.52	14.7	9.7	0.00404	0.00862
C02D5.2|C02D5.2|C02D5.2a	512	531	1.04	3.58e-05	9.51e-05
C02D5.2|C02D5.2|C02D5.2b	428	427	0.998	0.00363	0.0078
C02D5.4|C02D5.4|C02D5.4	695	574	0.827	1.71e-15	8.61e-15
C02D5.5|C02D5.5	0	0	NaN	NA	NA
C02E7.10|C02E7.10|C02E7.10	1.21	0.76	0.628	0.425	0.597
C02E7.16|C02E7.16	0	0	NaN	NA	NA
C02E7.17|C02E7.17	0	0	NaN	NA	NA
C02E7.6|C02E7.6|C02E7.6	1160	981	0.845	2.82e-07	8.94e-07
C02E7.7|C02E7.7|C02E7.7	738	470	0.636	4.35e-05	0.000115
C02E7.8|C02E7.8|C02E7.8	1.6	0.76	0.476	0.943	1
C02F12.10|C02F12.10|C02F12.10	27	18	0.668	0.804	0.939
C02F12.3|C02F12.3|C02F12.3	218	244	1.12	4.86e-33	4.62e-32
C02F12.5|C02F12.5|C02F12.5	8.69	2.79	0.32	0.0561	0.1
C02F12.8|C02F12.8|C02F12.8	576	802	1.39	3.87e-11	1.56e-10
C02F12.9|C02F12.9|C02F12.9	7.29	9.37	1.29	0.00021	0.000521
C02F12.t1|C02F12.t1	0.122	3.1	25.4	0.145	0.236
C02F4.10|C02F4.10	0.504	1.01	2.01	0.489	0.668
C02F4.11|C02F4.11	0	1.03	Inf	0.522	0.683
C02F4.4|C02F4.4|C02F4.4	231	212	0.918	1.03e-15	5.23e-15
C02F4.5|C02F4.5|C02F4.5	0.224	0.507	2.26	0.596	0.751
C02F4.9|C02F4.9	0.112	0.253	2.26	0.573	0.733
C02F5.10|C02F5.10|C02F5.10	82.9	61	0.736	0.00128	0.00291
C02F5.12|C02F5.12|C02F5.12	823	933	1.13	0.00226	0.00496
C02F5.13|C02F5.13|C02F5.13	538	447	0.831	4.51e-16	2.34e-15
C02F5.14|C02F5.14|C02F5.14	76.3	115	1.51	7.03e-31	6.23e-30
C02F5.2|C02F5.2|C02F5.2	13	12	0.92	0.636	0.787
C02F5.3|C02F5.3|C02F5.3	2820	2900	1.03	3.32e-19	1.96e-18
C02F5.5|C02F5.5|C02F5.5	13.6	11	0.805	0.663	0.814
C02F5.6|C02F5.6|C02F5.6a	600	770	1.28	0.686	0.836
C02F5.6|C02F5.6|C02F5.6b	703	917	1.3	0.866	0.992
C02F5.7|C02F5.7|C02F5.7a	2350	2790	1.19	1.37e-146	8.3e-145
C02F5.7|C02F5.7|C02F5.7b	1540	1830	1.19	1.64e-54	2.67e-53
C02G6.1|C02G6.1|C02G6.1	60.3	135	2.23	7.16e-12	3.01e-11
C02G6.2|C02G6.2|C02G6.2	9.29	45.4	4.88	2.93e-10	1.12e-09
C02G6.3|C02G6.3|C02G6.3	70.6	78.2	1.11	1.33e-08	4.61e-08
C02G6.5|C02G6.5	0	0	NaN	NA	NA
C02H6.1|C02H6.1|C02H6.1	0.699	0.76	1.09	0.881	1
C02H7.4|C02H7.4	0	0	NaN	NA	NA
C02H7.5|C02H7.5	0	0	NaN	NA	NA
C03A3.1|C03A3.1|C03A3.1a	743	620	0.834	0.228	0.353
C03A3.1|C03A3.1|C03A3.1b	732	617	0.842	0.382	0.547
C03A3.2|C03A3.2|C03A3.2	1430	1650	1.15	4.14e-31	3.7e-30
C03A3.3|C03A3.3|C03A3.3	49.3	54.4	1.1	8.4e-09	2.95e-08
C03A3.4|C03A3.4	0	0	NaN	NA	NA
C03A3.5|C03A3.5	0.241	0	0	1	1
C03A3.6|C03A3.6	0.244	1.01	4.15	0.388	0.555
C03A3.7|C03A3.7	0.122	0.253	2.08	0.576	0.734
C03A3.8|C03A3.8	1.29	2.83	2.18	0.144	0.235
C03A3.t1|C03A3.t1	0.234	2.83	12.1	0.0526	0.0942
C03A7.12|C03A7.12|C03A7.12	37.8	40.8	1.08	1	1
C03A7.13|C03A7.13|C03A7.13	29.6	14.6	0.493	0.0843	0.145
C03A7.15|C03A7.15	0.402	0.507	1.26	0.716	0.86
C03A7.2|C03A7.2|C03A7.2	19.9	18.2	0.913	0.145	0.236
C03B1.10|C03B1.10|C03B1.10	7.18	28.5	3.97	0.00011	0.000279
C03B1.13|C03B1.13|C03B1.13	237	318	1.34	1.71e-14	8.23e-14
C03B1.14|C03B1.14|C03B1.14	24.2	29.1	1.2	0.0463	0.0837
C03B1.16|C03B1.16	0.122	1.29	10.5	0.488	0.666
C03B1.1|C03B1.1|C03B1.1	9.06	10.8	1.19	1	1
C03B1.2|C03B1.2|C03B1.2	9.42	18.3	1.94	4.47e-08	1.5e-07
C03B1.3|C03B1.3|C03B1.3	0.969	0.507	0.523	1	1
C03B1.4|C03B1.4|C03B1.4	10.3	8.61	0.837	0.0319	0.0595
C03B1.5|C03B1.5|C03B1.5	85.6	112	1.31	5.51e-25	4.04e-24
C03B1.6|C03B1.6|C03B1.6a	0.224	0.253	1.13	0.674	0.826
C03B1.6|C03B1.6|C03B1.6b	0.989	0.76	0.768	1	1
C03B1.7|C03B1.7|C03B1.7	599	739	1.23	2.51e-07	7.98e-07
C03B1.9|C03B1.9|C03B1.9	0.686	1.03	1.51	1	1
C03B8.2|C03B8.2|C03B8.2	157	114	0.73	0.000361	0.000871
C03B8.3|C03B8.3|C03B8.3	19.5	14.1	0.722	0.0503	0.0904
C03B8.5|C03B8.5	0.129	1.29	9.95	0.487	0.665
C03B8.6|C03B8.6	0	0	NaN	NA	NA
C03C10.10|C03C10.10	0.241	0.253	1.05	0.687	0.836
C03C10.11|C03C10.11	0	0	NaN	NA	NA
C03C10.12|C03C10.12	0.112	0	0	1	1
C03C10.2|C03C10.2|C03C10.2	37.3	32.3	0.865	0.546	0.708
C03C10.4|C03C10.4|C03C10.4	1080	1020	0.939	8.34e-20	5.05e-19
C03C10.5|C03C10.5|C03C10.5	185	152	0.822	0.00474	0.01
C03C10.7|C03C10.7|C03C10.7	161	202	1.26	0.336	0.492
C03C10.9|C03C10.9|C03C10.9	93	95.5	1.03	0.822	0.955
C03C11.1|C03C11.1|C03C11.1	13.3	10.4	0.787	1	1
C03C11.5|C03C11.5	0.241	0	0	1	1
C03C11.6|C03C11.6	0.416	0	0	1	1
C03C11.7|C03C11.7	0.129	0	0	1	1
C03C11.8|C03C11.8	0.241	0	0	1	1
C03D6.1|C03D6.1|C03D6.1	113	118	1.04	1	1
C03E10.1|C03E10.1|C03E10.1	0.381	0	0	1	1
C03E10.3|C03E10.3|C03E10.3	22.6	18.8	0.834	0.933	1
C03E10.8|C03E10.8	0.54	0.507	0.939	0.854	0.984
C03E10.9|C03E10.9	0.241	0.253	1.05	0.687	0.836
C03F11.1|C03F11.1|C03F11.1	26.8	42.6	1.59	1.13e-15	5.75e-15
C03F11.2|C03F11.2|C03F11.2	77.3	122	1.58	3.01e-41	3.56e-40
C03F11.4|C03F11.4|C03F11.4	256	245	0.957	1.8e-18	1.03e-17
C03F11.5|C03F11.5	0.112	0	0	1	1
C03F11.6|C03F11.6	0	0	NaN	NA	NA
C03F11.7|C03F11.7	0.409	0	0	1	1
C03F11.t1|C03F11.t1	0.122	3.1	25.4	0.145	0.236
C03G6.17|C03G6.17|C03G6.17	86.2	113	1.31	4.68e-23	3.22e-22
C03G6.5|C03G6.5|C03G6.5	18.5	26.9	1.46	2.34e-06	6.91e-06
C03G6.6|C03G6.6|C03G6.6	7.25	6.33	0.874	0.089	0.152
C03H12.1|C03H12.1|C03H12.1	1100	1300	1.18	0.000375	0.000903
C03H12.2|C03H12.2	12.9	7.39	0.57	0.039	0.0717
C03H12.3|C03H12.3	13.1	7.64	0.585	0.0513	0.092
C03H5.2|C03H5.2|C03H5.2	792	705	0.891	0.00849	0.0173
C03H5.3|C03H5.3|C03H5.3	808	947	1.17	0.586	0.743
C03H5.4|C03H5.4|C03H5.4	19.7	10.3	0.52	0.000816	0.00189
C03H5.5|C03H5.5|C03H5.5	199	247	1.24	2.17e-35	2.21e-34
C03H5.6|C03H5.6|C03H5.6	171	179	1.04	3.47e-19	2.05e-18
C03H5.7|C03H5.7|C03H5.7	136	85.8	0.629	7.09e-09	2.5e-08
C03H5.8|C03H5.8	1.81	1.03	0.57	0.485	0.663
C04A11.1|C04A11.1|C04A11.1	190	173	0.907	1.52e-09	5.61e-09
C04A11.2|C04A11.2|C04A11.2	720	848	1.18	0.0324	0.0604
C04A11.5|C04A11.5|C04A11.5	14.8	23.3	1.58	1.99e-07	6.38e-07
C04A11.6|C04A11.6	0.346	0	0	1	1
C04A11.7|C04A11.7	0	0	NaN	NA	NA
C04A11.8|C04A11.8	0.528	1.03	1.95	1	1
C04A11.t1|C04A11.t1	0	7.23	Inf	0.000243	0.000596
C04A2.10|C04A2.10	0.353	0	0	1	1
C04A2.11|C04A2.11	0.989	2.05	2.07	0.55	0.712
C04A2.12|C04A2.12	0.493	1.01	2.06	0.493	0.672
C04A2.13|C04A2.13	0.353	0	0	1	1
C04A2.14|C04A2.14	0	1.29	Inf	0.347	0.504
C04A2.8|C04A2.8	0.129	0.253	1.96	0.579	0.735
C04A2.9|C04A2.9	0.224	0	0	1	1
C04A2.t1|C04A2.t1	0	1.54	Inf	0.217	0.338
C04B4.1|C04B4.1|C04B4.1	3.54	0.507	0.143	0.0158	0.031
C04B4.2|C04B4.2|C04B4.2	410	455	1.11	9.98e-19	5.76e-18
C04B4.4|C04B4.4|C04B4.4	5.11	4.31	0.843	0.147	0.239
C04B4.5|C04B4.5|C04B4.5	0.27	0	0	1	1
C04B4.6|C04B4.6|C04B4.6	0	0	NaN	NA	NA
C04C11.10|C04C11.10	0.727	2.03	2.79	0.038	0.07
C04C11.11|C04C11.11	0.112	0	0	1	1
C04C11.12|C04C11.12	0	0	NaN	NA	NA
C04C11.13|C04C11.13	0.727	2.03	2.79	0.038	0.07
C04C11.14|C04C11.14	0.112	0	0	1	1
C04C11.15|C04C11.15	0	0	NaN	NA	NA
C04C11.16|C04C11.16	0.234	1.03	4.41	0.912	1
C04C11.17|C04C11.17	0	0	NaN	NA	NA
C04C11.18|C04C11.18	0	0	NaN	NA	NA
C04C11.19|C04C11.19	0	0.253	Inf	0.519	0.683
C04C11.1|C04C11.1	47.1	54	1.15	2.29e-09	8.34e-09
C04C11.1|C04C11.1|C04C11.1a	53.2	57.1	1.07	4.89e-09	1.74e-08
C04C11.20|C04C11.20	0	0	NaN	NA	NA
C04C11.21|C04C11.21	1.64	3.1	1.89	0.943	1
C04C11.22|C04C11.22	0.112	0	0	1	1
C04C11.5|C04C11.5	0.112	0	0	1	1
C04C11.6|C04C11.6	2.69	1.77	0.659	0.247	0.377
C04C11.7|C04C11.7	0	0	NaN	NA	NA
C04C11.8|C04C11.8	1.74	23.7	13.7	1.79e-06	5.33e-06
C04C11.9|C04C11.9	3.4	4.6	1.35	0.0896	0.153
C04C3.10|C04C3.10	0	0	NaN	NA	NA
C04C3.11|C04C3.11	0	0	NaN	NA	NA
C04C3.12|C04C3.12	0	0	NaN	NA	NA
C04C3.13|C04C3.13	0	0	NaN	NA	NA
C04C3.3|C04C3.3|C04C3.3	1880	2160	1.15	0.384	0.55
C04C3.4|C04C3.4|C04C3.4	10.5	9.18	0.873	0.807	0.942
C04C3.6|C04C3.6|C04C3.6	5.2	5.57	1.07	0.0933	0.159
C04C3.7|C04C3.7|C04C3.7	0.122	0	0	1	1
C04C3.9|C04C3.9|C04C3.9	1.51	1.27	0.84	0.927	1
C04D8.2|C04D8.2	0.112	0	0	1	1
C04D8.3|C04D8.3	0.774	3.33	4.31	0.0815	0.14
C04D8.4|C04D8.4	0.241	1.03	4.28	0.917	1
C04D8.5|C04D8.5	0.251	0.253	1.01	0.694	0.842
C04E12.10|C04E12.10|C04E12.10	0.363	1.77	4.88	0.0955	0.162
C04E12.2|C04E12.2|C04E12.2	2.97	5.65	1.9	0.769	0.906
C04E12.4|C04E12.4|C04E12.4	4.21	4.6	1.09	0.348	0.506
C04E12.5|C04E12.5|C04E12.5	2.56	1.27	0.495	0.718	0.861
C04E12.6|C04E12.6|C04E12.6	0.392	2.32	5.92	0.447	0.622
C04E6.11|C04E6.11|C04E6.11	497	710	1.43	2.86e-17	1.55e-16
C04E6.12|C04E6.12	53.5	46.2	0.864	0.102	0.172
C04E6.13|C04E6.13|C04E6.13	28.1	22.8	0.813	0.00585	0.0122
C04E6.14|C04E6.14	0	0	NaN	NA	NA
C04E6.3|C04E6.3|C04E6.3	0.129	0	0	1	1
C04E6.4|C04E6.4|C04E6.4	0.112	0	0	1	1
C04E6.5|C04E6.5|C04E6.5	0.514	1.27	2.46	0.322	0.474
C04E6.7|C04E6.7|C04E6.7	129	111	0.858	0.0616	0.109
C04E6.8|C04E6.8|C04E6.8	5.4	3.29	0.609	1	1
C04E7.1|C04E7.1|C04E7.1	1.84	0	0	0.0218	0.0418
C04E7.3|C04E7.3|C04E7.3	207	229	1.11	1.84e-06	5.46e-06
C04E7.4|C04E7.4|C04E7.4	296	294	0.995	5.83e-07	1.8e-06
C04E7.5|C04E7.5|C04E7.5	4.96	1.29	0.259	0.0158	0.031
C04E7.7|C04E7.7	3.39	8.75	2.58	0.00106	0.00243
C04E7.t1|C04E7.t1	3.39	7.72	2.28	0.00254	0.00554
C04F1.1|C04F1.1|C04F1.1	2.68	2.53	0.944	0.521	0.683
C04F1.4|C04F1.4	3.1	4.07	1.31	0.153	0.248
C04F1.5|C04F1.5	1.47	1.54	1.05	0.773	0.909
C04F12.12|C04F12.12|C04F12.12	1.59	0.507	0.319	0.426	0.599
C04F12.15|C04F12.15	0.718	0.253	0.353	1	1
C04F12.1|C04F12.1|C04F12.1	513	715	1.39	9.17e-06	2.56e-05
C04F12.5|C04F12.5|C04F12.5	128	173	1.35	0.797	0.933
C04F12.6|C04F12.6|C04F12.6	4.74	2.55	0.538	0.319	0.473
C04F12.7|C04F12.7|C04F12.7	17.6	23.2	1.32	0.00264	0.00576
C04F12.8|C04F12.8|C04F12.8	131	127	0.966	5.18e-07	1.61e-06
C04F12.t1|C04F12.t1	16.3	9.98	0.61	0.0188	0.0364
C04F2.t1|C04F2.t1	0.251	3.61	14.3	0.0399	0.073
C04F5.2|C04F5.2|C04F5.2	1.04	0.76	0.728	1	1
C04F5.8|C04F5.8|C04F5.8	1340	1800	1.34	0.159	0.256
C04F5.9|C04F5.9|C04F5.9	375	474	1.26	0.0302	0.0567
C04F6.2|C04F6.2|C04F6.2	28.9	36.2	1.25	1.12e-09	4.15e-09
C04F6.7|C04F6.7|C04F6.7	2.13	2.28	1.07	0.144	0.235
C04F6.8|C04F6.8	0	0.253	Inf	0.519	0.683
C04G2.10|C04G2.10|C04G2.10a	21.4	16.9	0.786	0.583	0.739
C04G2.10|C04G2.10|C04G2.10b	14.1	10.7	0.759	0.857	0.987
C04G2.11|C04G2.11|C04G2.11	13.1	10.8	0.823	0.796	0.932
C04G2.12|C04G2.12	0.129	0.253	1.96	0.579	0.735
C04G2.2|C04G2.2|C04G2.2	12.3	12.3	0.999	0.95	1
C04G2.3|C04G2.3	10	14.6	1.46	0.569	0.733
C04G2.5|C04G2.5|C04G2.5	22.1	9.88	0.447	0.0646	0.113
C04G2.8|C04G2.8|C04G2.8	8.87	8.69	0.98	0.763	0.901
C04G2.9|C04G2.9|C04G2.9	4.49	15.2	3.39	0.12	0.2
C04G6.10|C04G6.10|C04G6.10	111	108	0.976	2.63e-09	9.54e-09
C04G6.11|C04G6.11|C04G6.11	0.594	0	0	0.964	1
C04G6.12|C04G6.12	0	7.23	Inf	0.000243	0.000596
C04G6.13|C04G6.13|C04G6.13	1.79	2.57	1.44	0.72	0.862
C04G6.14|C04G6.14	9.72	13.8	1.42	0.11	0.184
C04G6.2|C04G6.2|C04G6.2	16.6	18.5	1.12	0.00964	0.0195
C04G6.4|C04G6.4|C04G6.4	718	824	1.15	8.26e-06	2.32e-05
C04G6.5|C04G6.5|C04G6.5	41.9	35.7	0.853	7.58e-06	2.13e-05
C04G6.6|C04G6.6|C04G6.6	19.4	17.3	0.896	0.452	0.628
C04G6.7|C04G6.7|C04G6.7	104	98.1	0.944	6.43e-08	2.13e-07
C04H4.1|C04H4.1|C04H4.1	1.76	1.52	0.863	0.325	0.478
C04H4.2|C04H4.2	0	0	NaN	NA	NA
C04H4.3|C04H4.3	0	0	NaN	NA	NA
C04H4.4|C04H4.4	0	0	NaN	NA	NA
C04H4.5|C04H4.5	0.234	0	0	1	1
C04H4.6|C04H4.6	0.122	0	0	1	1
C04H5.10|C04H5.10	0	0	NaN	NA	NA
C04H5.1|C04H5.1|C04H5.1	357	346	0.97	0.129	0.213
C04H5.7|C04H5.7|C04H5.7a	5.24	6.08	1.16	0.0324	0.0604
C04H5.7|C04H5.7|C04H5.7b	17	23.9	1.41	8.37e-05	0.000215
C04H5.9|C04H5.9	7.19	9.63	1.34	0.00625	0.013
C05A2.2|C05A2.2	0	0	NaN	NA	NA
C05A2.3|C05A2.3	0.129	0	0	1	1
C05A9.10|C05A9.10	0.438	0.253	0.579	1	1
C05A9.11|C05A9.11	0	0	NaN	NA	NA
C05A9.2|C05A9.2|C05A9.2	863	855	0.991	0.00929	0.0188
C05A9.3|C05A9.3	0.373	0.507	1.36	0.707	0.853
C05A9.4|C05A9.4	0	0.76	Inf	0.401	0.57
C05A9.5|C05A9.5	2.69	1.01	0.377	1	1
C05A9.6|C05A9.6	2.81	1.01	0.36	1	1
C05A9.7|C05A9.7	3.46	3.55	1.03	0.564	0.727
C05A9.8|C05A9.8	0	0	NaN	NA	NA
C05A9.9|C05A9.9	0.708	1.54	2.18	0.774	0.91
C05B10.14|C05B10.14	0	0.253	Inf	0.519	0.683
C05B10.15|C05B10.15	0.27	0	0	1	1
C05B10.16|C05B10.16	0	0	NaN	NA	NA
C05B10.17|C05B10.17	9.07	5.07	0.559	1	1
C05B10.18|C05B10.18	0.259	1.01	3.92	0.382	0.547
C05B10.19|C05B10.19	0.27	0	0	1	1
C05B10.20|C05B10.20	0.363	0.507	1.39	0.704	0.851
C05B10.21|C05B10.21	0	0.253	Inf	0.519	0.683
C05B5.10|C05B5.10	1.52	10	6.59	0.00241	0.00528
C05B5.11|C05B5.11|C05B5.11	4.69	8.22	1.75	0.437	0.611
C05B5.12|C05B5.12|C05B5.12	0.718	1.27	1.76	0.322	0.475
C05B5.13|C05B5.13	1.45	2.32	1.6	0.773	0.909
C05B5.14|C05B5.14	1.36	1.03	0.761	0.298	0.446
C05B5.15|C05B5.15	0.445	0	0	1	1
C05B5.1|C05B5.1|C05B5.1	3.04	1.54	0.506	0.865	0.991
C05B5.2|C05B5.2|C05B5.2	2.81	2.3	0.818	0.793	0.928
C05B5.4|C05B5.4|C05B5.4	292	304	1.04	0.748	0.887
C05B5.5|C05B5.5|C05B5.5	15.7	22.6	1.44	8.49e-05	0.000218
C05B5.8|C05B5.8|C05B5.8	375	243	0.649	0.000479	0.00114
C05B5.9|C05B5.9	5.98	5.09	0.85	0.553	0.715
C05C10.2|C05C10.2|C05C10.2a	3410	4660	1.37	0.316	0.468
C05C10.2|C05C10.2|C05C10.2b	6860	9370	1.37	0.341	0.498
C05C10.3|C05C10.3|C05C10.3	2160	2840	1.31	9.59e-22	6.28e-21
C05C10.5|C05C10.5|C05C10.5a	1460	1400	0.963	9.86e-63	1.94e-61
C05C10.5|C05C10.5|C05C10.5b	943	896	0.951	8.97e-46	1.19e-44
C05C10.5|C05C10.5|C05C10.5c	2730	2520	0.924	1.01e-136	5.58e-135
C05C10.7|C05C10.7|C05C10.7	77.7	69.6	0.896	0.17	0.272
C05C10.8|C05C10.8|C05C10.8	1.71	1.79	1.05	1	1
C05C12.10|C05C12.10	0	0	NaN	NA	NA
C05C12.1|C05C12.1|C05C12.1	6.79	5.87	0.863	0.922	1
C05C12.4|C05C12.4|C05C12.4	284	232	0.818	1.79e-11	7.35e-11
C05C12.5|C05C12.5|C05C12.5	2.31	1.01	0.439	1	1
C05C12.6|C05C12.6|C05C12.6	25.7	31.7	1.23	1.86e-08	6.4e-08
C05C8.10|C05C8.10	43.4	36.1	0.832	0.114	0.191
C05C8.1|C05C8.1|C05C8.1a	668	688	1.03	0.00186	0.00414
C05C8.1|C05C8.1|C05C8.1b	294	315	1.07	0.0926	0.158
C05C8.2|C05C8.2|C05C8.2	2060	2420	1.17	0.016	0.0313
C05C8.5|C05C8.5|C05C8.5	1820	2090	1.15	0.812	0.946
C05C8.6|C05C8.6|C05C8.6	1020	1140	1.12	0.247	0.377
C05C8.7|C05C8.7|C05C8.7	6130	6000	0.979	0.000518	0.00123
C05C8.8|C05C8.8|C05C8.8	2.54	7.6	2.99	1.76e-06	5.23e-06
C05C9.10|C05C9.10	0	0	NaN	NA	NA
C05C9.11|C05C9.11	0	0	NaN	NA	NA
C05C9.12|C05C9.12	0	0	NaN	NA	NA
C05C9.13|C05C9.13	0	0	NaN	NA	NA
C05C9.14|C05C9.14	0	0	NaN	NA	NA
C05C9.1|C05C9.1|C05C9.1	146	187	1.28	9.13e-39	1.01e-37
C05C9.2|C05C9.2|C05C9.2	23.2	18.7	0.808	0.109	0.183
C05C9.3|C05C9.3|C05C9.3	40	34.8	0.871	0.0867	0.148
C05C9.5|C05C9.5	0	0	NaN	NA	NA
C05C9.6|C05C9.6	0	0	NaN	NA	NA
C05C9.7|C05C9.7	4.47	7.72	1.72	0.00832	0.017
C05C9.8|C05C9.8	0	0	NaN	NA	NA
C05C9.9|C05C9.9	0	0	NaN	NA	NA
C05C9.t1|C05C9.t1	3.39	7.72	2.28	0.00254	0.00554
C05C9.t2|C05C9.t2	3.39	7.72	2.28	0.00254	0.00554
C05D10.1|C05D10.1|C05D10.1a	1750	1810	1.03	0.419	0.591
C05D10.1|C05D10.1|C05D10.1b	1320	1370	1.04	0.721	0.863
C05D10.1|C05D10.1|C05D10.1c	5740	5820	1.01	0.205	0.321
C05D10.2|C05D10.2|C05D10.2a	355	439	1.23	1.63e-48	2.31e-47
C05D10.2|C05D10.2|C05D10.2b	423	538	1.27	1.35e-62	2.64e-61
C05D10.2|C05D10.2|C05D10.2c	340	425	1.25	2.5e-47	3.44e-46
C05D10.4|C05D10.4|C05D10.4a	853	924	1.08	1.18e-32	1.11e-31
C05D10.4|C05D10.4|C05D10.4b	900	958	1.06	7.4e-32	6.78e-31
C05D10.4|C05D10.4|C05D10.4c	732	770	1.05	2.32e-20	1.44e-19
C05D11.10|C05D11.10|C05D11.10	536	525	0.979	1.25e-07	4.05e-07
C05D11.13|C05D11.13|C05D11.13	385	534	1.39	1.43e-12	6.24e-12
C05D11.1|C05D11.1|C05D11.1	2080	2670	1.28	0.0111	0.0223
C05D11.5|C05D11.5|C05D11.5	144	151	1.04	0.00841	0.0172
C05D11.7|C05D11.7|C05D11.7a	4380	4850	1.11	4.22e-24	3.01e-23
C05D11.7|C05D11.7|C05D11.7b	2620	2840	1.08	1.11e-17	6.14e-17
C05D11.8|C05D11.8|C05D11.8	1160	1410	1.22	3.62e-11	1.46e-10
C05D11.9|C05D11.9|C05D11.9	1370	1450	1.06	0.0887	0.152
C05D12.10|C05D12.10	0	0.253	Inf	0.519	0.683
C05D12.11|C05D12.11	0.717	0.76	1.06	0.884	1
C05D12.1|C05D12.1|C05D12.1	475	631	1.33	1.11e-110	4.72e-109
C05D12.2|C05D12.2|C05D12.2	16.4	11.9	0.726	0.0789	0.136
C05D12.3|C05D12.3	215	350	1.63	8.07e-112	3.49e-110
C05D12.3|C05D12.3|C05D12.3a	219	356	1.63	7.92e-113	3.45e-111
C05D12.3|C05D12.3|C05D12.3c	434	713	1.64	3.59e-238	4.3e-236
C05D12.4|C05D12.4|C05D12.4	588	651	1.11	2.66e-06	7.81e-06
C05D12.5|C05D12.5|C05D12.5	476	447	0.939	5.41e-16	2.79e-15
C05D12.7|C05D12.7|C05D12.7	33.3	38.1	1.14	7.77e-05	0.0002
C05D12.8|C05D12.8	0.734	0	0	0.752	0.891
C05D12.9|C05D12.9	0.717	0.76	1.06	0.884	1
C05D2.10|C05D2.10|C05D2.10a	3240	3450	1.06	6.12e-21	3.89e-20
C05D2.10|C05D2.10|C05D2.10b	1530	1650	1.08	6.82e-11	2.71e-10
C05D2.11|C05D2.11	358	487	1.36	8.53e-61	1.6e-59
C05D2.12|C05D2.12	0	0	NaN	NA	NA
C05D2.13|C05D2.13	0	0	NaN	NA	NA
C05D2.14|C05D2.14	11.4	20.9	1.84	7.1e-05	0.000184
C05D2.15|C05D2.15	1.47	3.84	2.61	0.193	0.304
C05D2.16|C05D2.16	2.81	3.08	1.09	0.527	0.686
C05D2.17|C05D2.17	0.244	4.11	16.8	0.00504	0.0106
C05D2.3|C05D2.3|C05D2.3	6.41	6.61	1.03	0.131	0.216
C05D2.6|C05D2.6|C05D2.6a	1140	1370	1.21	0.458	0.635
C05D2.6|C05D2.6|C05D2.6b	962	1190	1.24	0.685	0.835
C05D2.8|C05D2.8|C05D2.8	161	164	1.02	0.00208	0.0046
C05D9.10|C05D9.10	0	0	NaN	NA	NA
C05D9.11|C05D9.11	0	0	NaN	NA	NA
C05D9.3|C05D9.3|C05D9.3	1260	1280	1.01	0.000913	0.0021
C05D9.4|C05D9.4|C05D9.4	12.9	15	1.16	0.0101	0.0203
C05D9.7|C05D9.7|C05D9.7	977	983	1.01	9.34e-07	2.84e-06
C05D9.9|C05D9.9|C05D9.9a	8.74	11.7	1.34	0.00638	0.0132
C05D9.9|C05D9.9|C05D9.9b	16.3	19.5	1.2	4.78e-05	0.000125
C05E11.10|C05E11.10	51.9	41.9	0.807	0.137	0.225
C05E11.11|C05E11.11	0.251	0	0	1	1
C05E11.12|C05E11.12	0.458	0	0	1	1
C05E11.13|C05E11.13	0	0	NaN	NA	NA
C05E11.14|C05E11.14	0.346	0	0	1	1
C05E11.15|C05E11.15	0.251	0	0	1	1
C05E11.16|C05E11.16	0.504	0.507	1.01	0.839	0.97
C05E11.17|C05E11.17	0.356	0	0	1	1
C05E11.18|C05E11.18	0	0	NaN	NA	NA
C05E11.2|C05E11.2|C05E11.2	0.122	0.76	6.23	0.444	0.619
C05E11.3|C05E11.3|C05E11.3	1040	838	0.805	1.03e-05	2.87e-05
C05E11.6|C05E11.6|C05E11.6	17.6	11.9	0.678	1	1
C05E11.7|C05E11.7|C05E11.7	116	134	1.16	2.69e-18	1.53e-17
C05E11.9|C05E11.9	1.56	2.53	1.62	0.149	0.242
C05E4.12|C05E4.12|C05E4.12	88.4	85.6	0.968	1	1
C05E4.7|C05E4.7|C05E4.7	5.67	1.54	0.271	0.0115	0.023
C05E7.1|C05E7.1|C05E7.1	490	380	0.776	6.58e-08	2.17e-07
C05E7.2|C05E7.2|C05E7.2	380	255	0.671	0.556	0.718
C05E7.3|C05E7.3|C05E7.3	38	42.7	1.12	7.24e-06	2.04e-05
C05E7.4|C05E7.4|C05E7.4	4.36	3.82	0.875	0.771	0.908
C05E7.5|C05E7.5	0	0	NaN	NA	NA
C05E7.6|C05E7.6	0	0	NaN	NA	NA
C05E7.t1|C05E7.t1	0.336	9.55	28.4	0.000615	0.00144
C05E7.t2|C05E7.t2	0.336	9.55	28.4	0.000615	0.00144
C05E7.t3|C05E7.t3	3.39	7.72	2.28	0.00254	0.00554
C05G5.10|C05G5.10	0.371	0	0	1	1
C05G5.1|C05G5.1|C05G5.1	311	364	1.17	4.89e-31	4.36e-30
C05G5.2|C05G5.2|C05G5.2	908	983	1.08	0.776	0.911
C05G5.3|C05G5.3|C05G5.3	382	343	0.898	0.294	0.441
C05G5.4|C05G5.4|C05G5.4	3630	3540	0.976	3.52e-23	2.42e-22
C05G5.5|C05G5.5|C05G5.5	445	497	1.12	0.224	0.347
C05G5.7|C05G5.7|C05G5.7	7.11	4.56	0.641	0.955	1
C05G5.8|C05G5.8	0	0	NaN	NA	NA
C05G5.9|C05G5.9	3.92	13.1	3.35	0.0612	0.108
C05G6.4|C05G6.4	5.09	25.6	5.02	0.00577	0.012
C05G6.5|C05G6.5	5.09	26.6	5.23	0.00338	0.00729
C05G6.t1|C05G6.t1	0.158	0	0	1	1
C05H8.3|C05H8.3	8.39	14.9	1.78	0.0777	0.134
C05H8.4|C05H8.4	1.44	1.27	0.877	0.927	1
C06A1.10|C06A1.10	0	0	NaN	NA	NA
C06A1.11|C06A1.11	0	0	NaN	NA	NA
C06A1.2|C06A1.2|C06A1.2	173	121	0.703	0.445	0.62
C06A1.3|C06A1.3|C06A1.3	6.26	2.79	0.445	0.381	0.546
C06A1.4|C06A1.4	450	946	2.1	7.32e-31	6.48e-30
C06A1.6|C06A1.6|C06A1.6	11.4	6.16	0.541	0.0324	0.0604
C06A1.7|C06A1.7|C06A1.7	7.88	6.18	0.784	0.144	0.235
C06A1.8|C06A1.8	1	2.83	2.82	0.55	0.712
C06A1.9|C06A1.9	0	0	NaN	NA	NA
C06A12.17|C06A12.17	0	0	NaN	NA	NA
C06A12.18|C06A12.18	0	0	NaN	NA	NA
C06A12.3|C06A12.3|C06A12.3a	79.2	77.1	0.973	0.000686	0.0016
C06A12.3|C06A12.3|C06A12.3b	121	128	1.06	7.4e-07	2.27e-06
C06A12.3|C06A12.3|C06A12.3c	35.3	38.5	1.09	0.00801	0.0164
C06A12.8|C06A12.8|C06A12.8	0.241	0	0	1	1
C06A5.10|C06A5.10|C06A5.10	35.3	32.5	0.919	0.815	0.949
C06A5.12|C06A5.12|C06A5.12	100	106	1.06	0.443	0.618
C06A5.1|C06A5.1|C06A5.1	2120	2470	1.16	0.0299	0.0562
C06A5.2|C06A5.2|C06A5.2	16.1	13.6	0.843	0.653	0.804
C06A5.3|C06A5.3|C06A5.3a	3400	4250	1.25	8.39e-21	5.31e-20
C06A5.3|C06A5.3|C06A5.3b	1600	2010	1.26	2.15e-11	8.79e-11
C06A5.4|C06A5.4|C06A5.4	60.4	36.6	0.606	1.56e-05	4.28e-05
C06A5.5|C06A5.5|C06A5.5	107	125	1.16	0.869	0.995
C06A5.6|C06A5.6|C06A5.6	1050	2250	2.13	1.36e-63	2.72e-62
C06A5.8|C06A5.8|C06A5.8a	119	199	1.67	0.48	0.658
C06A5.8|C06A5.8|C06A5.8b	213	356	1.67	0.48	0.659
C06A6.10|C06A6.10	0.373	0.253	0.678	1	1
C06A6.11|C06A6.11	0.373	0.253	0.678	1	1
C06A6.12|C06A6.12	0.353	1.29	3.64	0.778	0.913
C06A6.13|C06A6.13	0.353	0.253	0.717	1	1
C06A6.14|C06A6.14	0.112	0	0	1	1
C06A6.2|C06A6.2|C06A6.2a	1500	1700	1.13	5.59e-05	0.000146
C06A6.2|C06A6.2|C06A6.2b	1530	1710	1.12	0.000119	0.000302
C06A6.4|C06A6.4|C06A6.4a	1640	2340	1.42	3.02e-10	1.16e-09
C06A6.4|C06A6.4|C06A6.4b	898	1250	1.4	9.52e-05	0.000243
C06A6.5|C06A6.5|C06A6.5	1560	1320	0.843	3.95e-17	2.14e-16
C06A6.7|C06A6.7|C06A6.7	24.9	15.8	0.633	0.439	0.612
C06A6.9|C06A6.9	0.112	0	0	1	1
C06A8.13|C06A8.13	0	1.03	Inf	0.522	0.683
C06A8.14|C06A8.14	0	0.253	Inf	0.519	0.683
C06A8.15|C06A8.15	0	0.253	Inf	0.519	0.683
C06A8.16|C06A8.16	1.26	0.253	0.201	0.346	0.504
C06A8.17|C06A8.17	1.86	0.253	0.136	1	1
C06A8.1|C06A8.1|C06A8.1a	3740	3860	1.03	0.000605	0.00142
C06A8.1|C06A8.1|C06A8.1b	2080	2130	1.02	0.0139	0.0275
C06A8.2|C06A8.2|C06A8.2	1090	1310	1.2	0.917	1
C06A8.3|C06A8.3|C06A8.3	2500	1720	0.69	3.25e-175	2.58e-173
C06A8.6|C06A8.6|C06A8.6	27.6	8.93	0.323	4.76e-09	1.7e-08
C06A8.8|C06A8.8|C06A8.8a	400	213	0.531	2.02e-27	1.6e-26
C06A8.8|C06A8.8|C06A8.8b	865	459	0.531	1.23e-66	2.62e-65
C06B3.16|C06B3.16|C06B3.16	0.596	1.52	2.55	0.147	0.239
C06B3.1|C06B3.1|C06B3.1	0.901	1.03	1.15	0.811	0.946
C06B3.6|C06B3.6|C06B3.6	391	365	0.933	5.66e-08	1.88e-07
C06B3.7|C06B3.7|C06B3.7	14	13.3	0.95	0.885	1
C06B8.11|C06B8.11|C06B8.11	0.112	0	0	1	1
C06B8.13|C06B8.13	0	0	NaN	NA	NA
C06B8.14|C06B8.14	0.129	0	0	1	1
C06B8.15|C06B8.15	6.49	24.2	3.73	1.61e-05	4.41e-05
C06B8.2|C06B8.2|C06B8.2a	331	314	0.948	2.11e-16	1.11e-15
C06B8.2|C06B8.2|C06B8.2b	757	711	0.938	3.38e-33	3.23e-32
C06B8.2|C06B8.2|C06B8.2c	400	377	0.942	1.16e-19	6.99e-19
C06B8.2|C06B8.2|C06B8.2d	420	395	0.94	1.32e-21	8.61e-21
C06B8.3|C06B8.3|C06B8.3	0.158	0.76	4.81	0.431	0.604
C06B8.7|C06B8.7|C06B8.7	4130	4760	1.15	3.37e-06	9.8e-06
C06B8.t1|C06B8.t1	0	0.253	Inf	0.519	0.683
C06B8.t2|C06B8.t2	0	1.03	Inf	0.522	0.683
C06B8.t3|C06B8.t3	3.48	20.1	5.77	1.53e-06	4.59e-06
C06C3.10|C06C3.10|C06C3.10	128	127	0.991	1.29e-11	5.33e-11
C06C3.11|C06C3.11	49.1	56.5	1.15	6.79e-15	3.34e-14
C06C3.12|C06C3.12|C06C3.12	23.1	30.9	1.34	0.0786	0.136
C06C3.13|C06C3.13	0	0	NaN	NA	NA
C06C3.3|C06C3.3|C06C3.3	93.4	129	1.38	9.49e-32	8.68e-31
C06C3.4|C06C3.4|C06C3.4	373	279	0.747	0.699	0.847
C06C3.5|C06C3.5	23.5	29.1	1.24	0.0114	0.0228
C06C3.7|C06C3.7|C06C3.7	122	131	1.07	0.00063	0.00147
C06C3.8|C06C3.8|C06C3.8	30.4	23.7	0.782	0.949	1
C06C3.9|C06C3.9|C06C3.9	143	107	0.746	0.75	0.889
C06C6.10|C06C6.10	12.5	6.16	0.493	0.00348	0.0075
C06C6.1|C06C6.1|C06C6.1	1.34	1.01	0.756	0.305	0.455
C06C6.6|C06C6.6|C06C6.6	3.29	0.253	0.077	0.106	0.178
C06C6.7|C06C6.7|C06C6.7	3.29	1.77	0.538	0.481	0.659
C06C6.8|C06C6.8|C06C6.8	1.43	4.09	2.87	0.0796	0.137
C06C6.9|C06C6.9|C06C6.9	0.158	0.253	1.6	0.591	0.746
C06E1.11|C06E1.11|C06E1.11	45.8	43.9	0.957	0.226	0.35
C06E1.12|C06E1.12	0.112	0	0	1	1
C06E1.13|C06E1.13	0	0.76	Inf	0.401	0.57
C06E1.14|C06E1.14	0	0.253	Inf	0.519	0.683
C06E1.15|C06E1.15	0	0.507	Inf	0.477	0.655
C06E1.1|C06E1.1|C06E1.1	962	746	0.776	4.47e-39	5.02e-38
C06E1.3|C06E1.3|C06E1.3	254	299	1.18	2.62e-34	2.59e-33
C06E1.7|C06E1.7|C06E1.7	31.8	26.4	0.831	0.0412	0.0753
C06E1.9|C06E1.9|C06E1.9	685	1050	1.54	1.28e-25	9.56e-25
C06E2.11|C06E2.11	75.8	489	6.45	2.59e-77	6.76e-76
C06E2.12|C06E2.12	0	0	NaN	NA	NA
C06E2.13|C06E2.13	0	0	NaN	NA	NA
C06E2.14|C06E2.14	0	0	NaN	NA	NA
C06E2.1|C06E2.1|C06E2.1	133	123	0.919	1.71e-11	7.01e-11
C06E2.2|C06E2.2|C06E2.2	0.704	0.507	0.72	1	1
C06E2.5|C06E2.5|C06E2.5	1000	917	0.915	1.32e-23	9.24e-23
C06E2.9|C06E2.9|C06E2.9	11.5	13.1	1.14	0.279	0.421
C06E4.15|C06E4.15	0.122	0	0	1	1
C06E4.16|C06E4.16	0	0	NaN	NA	NA
C06E4.17|C06E4.17	0	0.253	Inf	0.519	0.683
C06E4.18|C06E4.18	0	0.253	Inf	0.519	0.683
C06E4.19|C06E4.19	0.373	0.507	1.36	0.707	0.853
C06E4.1|C06E4.1|C06E4.1	0.112	0.253	2.26	0.573	0.733
C06E4.20|C06E4.20	0.336	9.55	28.4	0.000615	0.00144
C06E4.21|C06E4.21	0	0	NaN	NA	NA
C06E4.2|C06E4.2|C06E4.2	147	95.8	0.65	0.00186	0.00413
C06E4.3|C06E4.3|C06E4.3	16.1	12.9	0.805	0.794	0.929
C06E4.4|C06E4.4|C06E4.4	0.129	1.01	7.84	0.343	0.5
C06E4.5|C06E4.5|C06E4.5	0.682	0.253	0.371	1	1
C06E4.6|C06E4.6|C06E4.6	9.45	13.7	1.45	0.00295	0.0064
C06E4.8|C06E4.8|C06E4.8	6.07	10.4	1.71	4.03e-05	0.000106
C06E4.t1|C06E4.t1	0.336	9.55	28.4	0.000615	0.00144
C06E7.2|C06E7.2|C06E7.2	668	583	0.873	1.74e-18	9.96e-18
C06E7.4|C06E7.4|C06E7.4	1200	1480	1.23	4.61e-12	1.95e-11
C06E7.88|C06E7.88|C06E7.88	562	364	0.647	8.47e-09	2.97e-08
C06E7.89|C06E7.89	0.129	0	0	1	1
C06E7.90|C06E7.90	0	0.253	Inf	0.519	0.683
C06E7.91|C06E7.91	0	0	NaN	NA	NA
C06E7.92|C06E7.92	0.129	0	0	1	1
C06E7.93|C06E7.93	3.18	0.507	0.159	0.347	0.504
C06E7.94|C06E7.94	0	0	NaN	NA	NA
C06E8.5|C06E8.5|C06E8.5	165	116	0.705	0.0123	0.0246
C06E8.6|C06E8.6	0	0	NaN	NA	NA
C06E8.7|C06E8.7	0.112	0.253	2.26	0.573	0.733
C06G1.10|C06G1.10	13.7	17.8	1.3	0.012	0.024
C06G1.11|C06G1.11	2.99	39.2	13.1	3.18e-12	1.36e-11
C06G1.12|C06G1.12	1.82	2.05	1.13	1	1
C06G1.13|C06G1.13	0.129	0	0	1	1
C06G1.14|C06G1.14	0	0.253	Inf	0.519	0.683
C06G1.15|C06G1.15	2.99	39	13	8.22e-12	3.44e-11
C06G1.16|C06G1.16	2.51	1.01	0.403	0.837	0.969
C06G1.17|C06G1.17	1.84	2.3	1.25	1	1
C06G1.1|C06G1.1|C06G1.1a	795	749	0.942	7.43e-25	5.42e-24
C06G1.1|C06G1.1|C06G1.1b	946	876	0.926	1.39e-28	1.15e-27
C06G1.2|C06G1.2|C06G1.2	326	294	0.903	1.36e-19	8.17e-19
C06G1.5|C06G1.5|C06G1.5	1190	1210	1.02	8.14e-11	3.22e-10
C06G1.6|C06G1.6|C06G1.6	848	836	0.986	3.38e-18	1.91e-17
C06G1.7|C06G1.7	0	0.507	Inf	0.477	0.655
C06G1.8|C06G1.8	0.906	1.52	1.68	0.325	0.478
C06G1.9|C06G1.9	0.112	0	0	1	1
C06G1.t1|C06G1.t1	1.48	5.16	3.5	1	1
C06G1.t2|C06G1.t2	1.68	38.5	22.9	1.26e-12	5.52e-12
C06G1.t3|C06G1.t3	1.68	38.5	22.9	1.26e-12	5.52e-12
C06G1.t4|C06G1.t4	1.31	32	24.4	1.38e-13	6.34e-13
C06G3.3|C06G3.3|C06G3.3	7.47	6.35	0.85	0.321	0.474
C06G3.4|C06G3.4|C06G3.4	2.35	1.27	0.539	0.718	0.861
C06G3.5|C06G3.5|C06G3.5a	1120	1290	1.14	0.0584	0.104
C06G3.5|C06G3.5|C06G3.5b	1990	2270	1.14	0.0345	0.064
C06G3.6|C06G3.6|C06G3.6	2320	2190	0.943	1.35e-09	5e-09
C06G3.8|C06G3.8|C06G3.8	364	350	0.963	1.41e-09	5.18e-09
C06G3.9|C06G3.9|C06G3.9	2800	3220	1.15	3.37e-29	2.83e-28
C06G4.1|C06G4.1|C06G4.1	852	1350	1.58	2.92e-11	1.18e-10
C06G4.4|C06G4.4|C06G4.4	13.9	17.7	1.27	1	1
C06G4.6|C06G4.6|C06G4.6	27	19.5	0.722	0.119	0.197
C06G4.7|C06G4.7	1.78	7.99	4.5	0.194	0.306
C06G4.t1|C06G4.t1	1.78	7.99	4.5	0.194	0.306
C06G8.1|C06G8.1|C06G8.1	415	547	1.32	1.41e-14	6.84e-14
C06G8.3|C06G8.3	312	278	0.892	0.0524	0.0939
C06G8.3|C06G8.3|C06G8.3b	285	249	0.873	0.0676	0.118
C06G8.3|C06G8.3|C06G8.3c	308	268	0.869	0.0756	0.131
C06H2.10|C06H2.10	0.112	0	0	1	1
C06H2.2|C06H2.2|C06H2.2	797	818	1.03	0.723	0.864
C06H2.3|C06H2.3|C06H2.3	1000	1040	1.04	0.00164	0.00368
C06H2.6|C06H2.6|C06H2.6	954	1030	1.08	0.000428	0.00102
C06H2.7|C06H2.7|C06H2.7	911	853	0.936	5.3e-29	4.42e-28
C06H2.9|C06H2.9	0	0	NaN	NA	NA
C06H5.6|C06H5.6|C06H5.6	350	338	0.964	2.82e-05	7.54e-05
C06H5.7|C06H5.7|C06H5.7	1040	1050	1.01	5.42e-11	2.17e-10
C06H5.8|C06H5.8|C06H5.8	73.7	56.3	0.764	0.739	0.879
C06H5.9|C06H5.9	0.158	0	0	1	1
C07A12.10|C07A12.10	0.112	0	0	1	1
C07A12.11|C07A12.11	0.112	1.29	11.5	0.49	0.668
C07A12.12|C07A12.12	0	0	NaN	NA	NA
C07A12.13|C07A12.13	0.129	0	0	1	1
C07A12.14|C07A12.14	0.371	0.253	0.684	1	1
C07A12.15|C07A12.15	0	0.253	Inf	0.519	0.683
C07A12.16|C07A12.16	0	0	NaN	NA	NA
C07A12.17|C07A12.17	0.122	0	0	1	1
C07A12.2|C07A12.2|C07A12.2	3.27	10.6	3.26	4.3e-09	1.54e-08
C07A12.7|C07A12.7|C07A12.7a	2450	2340	0.955	0.000102	0.00026
C07A12.7|C07A12.7|C07A12.7b	1030	1020	0.991	0.207	0.323
C07A12.7|C07A12.7|C07A12.7c	1570	1550	0.987	0.0549	0.098
C07A12.9|C07A12.9	0	0.253	Inf	0.519	0.683
C07A4.2|C07A4.2|C07A4.2	49.1	54.8	1.12	6.97e-07	2.14e-06
C07A4.3|C07A4.3|C07A4.3	0.494	0.76	1.54	0.662	0.814
C07A4.4|C07A4.4	0.893	0.253	0.284	0.832	0.965
C07A4.5|C07A4.5	0	0	NaN	NA	NA
C07A4.6|C07A4.6	0	0	NaN	NA	NA
C07A4.7|C07A4.7	0.781	0.253	0.324	0.988	1
C07A4.8|C07A4.8	0	0	NaN	NA	NA
C07A4.9|C07A4.9	0	0	NaN	NA	NA
C07A9.10|C07A9.10|C07A9.10	3.31	5.32	1.61	0.00337	0.00726
C07A9.12|C07A9.12|C07A9.12	236	186	0.786	0.398	0.567
C07A9.13|C07A9.13|C07A9.13	84.7	118	1.4	2.95e-27	2.32e-26
C07A9.14|C07A9.14	4.1	1.29	0.314	0.09	0.153
C07A9.15|C07A9.15	1.44	0	0	0.401	0.57
C07A9.16|C07A9.16	2.63	5.14	1.95	1	1
C07A9.2|C07A9.2|C07A9.2	1280	1310	1.02	9.78e-21	6.17e-20
C07A9.5|C07A9.5|C07A9.5	93.3	153	1.64	2.63e-49	3.8e-48
C07A9.8|C07A9.8|C07A9.8	9.31	13.3	1.42	0.0294	0.0553
C07A9.9|C07A9.9|C07A9.9	320	324	1.01	1.01e-10	3.99e-10
C07B5.2|C07B5.2|C07B5.2	6.53	1.77	0.272	0.774	0.91
C07B5.3|C07B5.3|C07B5.3	10.4	9.63	0.922	0.0423	0.0772
C07B5.4|C07B5.4|C07B5.4a	677	756	1.12	6.81e-45	8.83e-44
C07B5.4|C07B5.4|C07B5.4b	501	573	1.14	5.64e-37	6e-36
C07B5.6|C07B5.6|C07B5.6	65	45	0.692	0.0627	0.11
C07B5.8|C07B5.8|C07B5.8	32.4	30.4	0.94	0.311	0.462
C07B5.9|C07B5.9	1.46	1.01	0.695	1	1
C07C7.1|C07C7.1|C07C7.1	17.7	8.11	0.458	0.55	0.712
C07D10.1|C07D10.1|C07D10.1	275	278	1.01	2.47e-10	9.51e-10
C07D10.5|C07D10.5|C07D10.5	3720	3700	0.996	1.32e-45	1.74e-44
C07D10.6|C07D10.6|C07D10.6	8.47	3.57	0.421	0.18	0.286
C07D8.2|C07D8.2	11	3.82	0.346	0.038	0.07
C07D8.5|C07D8.5|C07D8.5	0	0	NaN	NA	NA
C07D8.6|C07D8.6|C07D8.6	1530	1480	0.965	1.39e-34	1.39e-33
C07E3.10|C07E3.10|C07E3.10	187	131	0.703	0.876	1
C07E3.13|C07E3.13	0	0	NaN	NA	NA
C07E3.14|C07E3.14	0	0	NaN	NA	NA
C07E3.15|C07E3.15	0	0	NaN	NA	NA
C07E3.16|C07E3.16	0	0	NaN	NA	NA
C07E3.3|C07E3.3|C07E3.3	573	761	1.33	6.82e-110	2.86e-108
C07E3.4|C07E3.4|C07E3.4	33.7	66.4	1.97	3.45e-08	1.16e-07
C07E3.6|C07E3.6|C07E3.6	933	1070	1.14	0.0626	0.11
C07E3.8|C07E3.8|C07E3.8	38.8	32.3	0.832	0.0533	0.0953
C07E3.9|C07E3.9|C07E3.9	210	214	1.02	0.515	0.683
C07F11.2|C07F11.2|C07F11.2	55.2	67.4	1.22	0.00264	0.00576
C07G1.10|C07G1.10	0	0	NaN	NA	NA
C07G1.11|C07G1.11	0.521	0.253	0.486	1	1
C07G1.12|C07G1.12	1.59	1.77	1.12	0.603	0.757
C07G1.13|C07G1.13	1.32	0.253	0.192	1	1
C07G1.14|C07G1.14	1.37	2.81	2.05	0.25	0.38
C07G1.2|C07G1.2|C07G1.2	39.9	65.4	1.64	5.53e-20	3.37e-19
C07G1.6|C07G1.6|C07G1.6	1.97	4.81	2.45	0.00154	0.00347
C07G1.7|C07G1.7|C07G1.7	5.4	5.85	1.08	0.0776	0.134
C07G2.4|C07G2.4	2.62	3.61	1.37	0.408	0.578
C07G3.10|C07G3.10|C07G3.10	7.73	8.42	1.09	0.656	0.808
C07G3.13|C07G3.13	0.234	0	0	1	1
C07G3.8|C07G3.8|C07G3.8	9.47	8.44	0.891	0.306	0.456
C07H4.1|C07H4.1|C07H4.1	132	94.7	0.715	0.0515	0.0924
C07H4.3|C07H4.3	0.224	0	0	1	1
C07H4.4|C07H4.4	0.224	0.253	1.13	0.674	0.826
C07H6.10|C07H6.10	0.448	11.6	25.9	0.000219	0.00054
C07H6.11|C07H6.11	0.112	0	0	1	1
C07H6.12|C07H6.12	0.493	0.253	0.514	1	1
C07H6.13|C07H6.13	0.224	0	0	1	1
C07H6.14|C07H6.14	0	1.29	Inf	0.347	0.504
C07H6.15|C07H6.15	0.353	0	0	1	1
C07H6.16|C07H6.16	0.363	0.253	0.697	1	1
C07H6.17|C07H6.17	0.112	0	0	1	1
C07H6.18|C07H6.18	0.122	0.507	4.15	0.522	0.683
C07H6.2|C07H6.2|C07H6.2	417	428	1.03	0.000166	0.000416
C07H6.4|C07H6.4|C07H6.4	2250	3050	1.36	5.3e-05	0.000138
C07H6.9|C07H6.9|C07H6.9	56.9	44.6	0.784	0.00428	0.0091
C08A9.10|C08A9.10|C08A9.10	3.76	0.76	0.202	0.0297	0.0558
C08A9.11|C08A9.11	0.781	4.39	5.61	0.321	0.473
C08A9.12|C08A9.12	0.158	0	0	1	1
C08A9.2|C08A9.2	29.8	13.1	0.438	0.00025	0.000613
C08A9.3|C08A9.3|C08A9.3a	5.39	7.17	1.33	0.64	0.791
C08A9.3|C08A9.3|C08A9.3b	4.32	5.63	1.3	0.591	0.746
C08A9.6|C08A9.6|C08A9.6	349	438	1.26	0.11	0.184
C08A9.8|C08A9.8|C08A9.8	75.9	136	1.79	9.3e-05	0.000238
C08A9.9|C08A9.9|C08A9.9	15.4	16.1	1.04	0.633	0.784
C08B11.11|C08B11.11	0.244	0.507	2.08	0.6	0.754
C08B11.12|C08B11.12	0.468	1.29	2.75	0.938	1
C08B11.13|C08B11.13	0	0.253	Inf	0.519	0.683
C08B11.3|C08B11.3|C08B11.3	9800	11700	1.2	4.03e-20	2.47e-19
C08B11.6|C08B11.6|C08B11.6	1930	2190	1.13	2.81e-11	1.14e-10
C08B11.8|C08B11.8|C08B11.8	617	619	1	1.36e-05	3.74e-05
C08B11.9|C08B11.9|C08B11.9	579	669	1.15	0.0054	0.0113
C08B6.10|C08B6.10|C08B6.10	39.9	41.2	1.03	0.0842	0.144
C08B6.11|C08B6.11|C08B6.11	180	169	0.94	1.14e-16	6.06e-16
C08B6.14|C08B6.14|C08B6.14	0.224	0.253	1.13	0.674	0.826
C08B6.15|C08B6.15	4.65	3.29	0.708	0.662	0.814
C08B6.16|C08B6.16	0.382	1.27	3.32	0.294	0.441
C08B6.17|C08B6.17	166	140	0.844	3.33e-06	9.71e-06
C08B6.2|C08B6.2|C08B6.2a	2.17	2.28	1.05	0.144	0.235
C08B6.2|C08B6.2|C08B6.2b	2.17	2.28	1.05	0.144	0.235
C08B6.2|C08B6.2|C08B6.2c	2.28	2.79	1.22	0.0611	0.108
C08B6.3|C08B6.3|C08B6.3	224	318	1.42	1.02e-91	3.37e-90
C08B6.4|C08B6.4|C08B6.4a	1750	1280	0.733	1.26e-12	5.52e-12
C08B6.4|C08B6.4|C08B6.4b	1780	1310	0.737	3.55e-13	1.6e-12
C08B6.5|C08B6.5|C08B6.5	11.1	13.2	1.19	0.00127	0.00289
C08B6.6|C08B6.6|C08B6.6	1.44	2.57	1.78	1	1
C08B6.7|C08B6.7|C08B6.7a	3390	4330	1.28	2.12e-20	1.32e-19
C08B6.7|C08B6.7|C08B6.7b	1870	2350	1.25	2.24e-10	8.65e-10
C08B6.8|C08B6.8|C08B6.8	687	596	0.867	9.13e-14	4.23e-13
C08C3.10|C08C3.10	0	0	NaN	NA	NA
C08C3.11|C08C3.11	0	1.03	Inf	0.522	0.683
C08C3.4|C08C3.4|C08C3.4a	401	485	1.21	1.66e-06	4.95e-06
C08C3.4|C08C3.4|C08C3.4b	335	368	1.1	5.74e-09	2.04e-08
C08C3.6|C08C3.6	0	0	NaN	NA	NA
C08C3.7|C08C3.7	0	0	NaN	NA	NA
C08C3.8|C08C3.8	0.129	0	0	1	1
C08C3.9|C08C3.9	0.129	0	0	1	1
C08D8.1|C08D8.1|C08D8.1	8.98	10.7	1.19	0.117	0.195
C08D8.3|C08D8.3	0.27	9.55	35.4	0.000189	0.00047
C08D8.4|C08D8.4	0	0	NaN	NA	NA
C08D8.5|C08D8.5	0.112	0	0	1	1
C08D8.6|C08D8.6	0	0	NaN	NA	NA
C08E3.13|C08E3.13|C08E3.13	29	61.2	2.11	1.12e-31	1.02e-30
C08E3.14|C08E3.14|C08E3.14	0	0.253	Inf	0.519	0.683
C08E3.15|C08E3.15|C08E3.15	0.122	0.253	2.08	0.576	0.734
C08E3.1|C08E3.1|C08E3.1	9.73	26.2	2.69	1.01e-15	5.16e-15
C08E8.10|C08E8.10|C08E8.10	43.3	46.6	1.08	1.67e-05	4.56e-05
C08E8.11|C08E8.11|C08E8.11	0	0	NaN	NA	NA
C08E8.12|C08E8.12	0	0	NaN	NA	NA
C08E8.13|C08E8.13	0	0	NaN	NA	NA
C08E8.14|C08E8.14	0	0	NaN	NA	NA
C08E8.15|C08E8.15	0	0	NaN	NA	NA
C08E8.1|C08E8.1|C08E8.1	8.64	14.2	1.65	0.000608	0.00143
C08E8.2|C08E8.2|C08E8.2	1.62	0.253	0.157	0.138	0.227
C08E8.3|C08E8.3|C08E8.3	18.5	40	2.16	6.3e-23	4.32e-22
C08E8.4|C08E8.4|C08E8.4	21.8	55.8	2.56	4.93e-34	4.83e-33
C08E8.5|C08E8.5|C08E8.5	0.504	0.253	0.503	1	1
C08E8.6|C08E8.6|C08E8.6	2.37	2.53	1.07	0.444	0.619
C08E8.7|C08E8.7	4.63	5.89	1.27	1	1
C08E8.8|C08E8.8	0.922	0.253	0.275	0.816	0.95
C08E8.9|C08E8.9|C08E8.9	2.37	2.53	1.07	0.444	0.619
C08E8.t1|C08E8.t1	0	0	NaN	NA	NA
C08E8.t2|C08E8.t2	0	0	NaN	NA	NA
C08E8.t3|C08E8.t3	0	0.253	Inf	0.519	0.683
C08F1.10|C08F1.10|C08F1.10	1710	1480	0.869	4.3e-68	9.41e-67
C08F1.11|C08F1.11|C08F1.11	774	704	0.909	5.05e-11	2.02e-10
C08F1.6|C08F1.6|C08F1.6	1410	1190	0.844	8.2e-79	2.2e-77
C08F1.8|C08F1.8|C08F1.8	191	190	0.999	0.283	0.426
C08F11.10|C08F11.10|C08F11.10	5.23	12.8	2.45	0.0216	0.0415
C08F11.116|C08F11.116	0.129	0	0	1	1
C08F11.11|C08F11.11|C08F11.11	1.48	0	0	0.0416	0.076
C08F11.12|C08F11.12|C08F11.12	0	0	NaN	NA	NA
C08F11.13|C08F11.13|C08F11.13	910	536	0.589	1.7e-12	7.4e-12
C08F11.14|C08F11.14	1.41	0	0	0.413	0.584
C08F11.16|C08F11.16	0.903	12.4	13.7	0.00254	0.00554
C08F11.17|C08F11.17|C08F11.17	0	0	NaN	NA	NA
C08F11.18|C08F11.18	0	0	NaN	NA	NA
C08F11.19|C08F11.19	0	0	NaN	NA	NA
C08F11.1|C08F11.1|C08F11.1	8.12	9.63	1.19	0.0145	0.0285
C08F11.2|C08F11.2|C08F11.2	0.158	0	0	1	1
C08F11.3|C08F11.3|C08F11.3	0.316	0.253	0.802	0.743	0.883
C08F11.6|C08F11.6	13.8	40.6	2.94	0.000329	0.000796
C08F11.7|C08F11.7|C08F11.7	5.74	6.66	1.16	0.842	0.973
C08F8.10|C08F8.10	0.112	0	0	1	1
C08F8.11|C08F8.11	1.2	0	0	0.825	0.958
C08F8.12|C08F8.12	0.399	0.253	0.635	1	1
C08F8.13|C08F8.13	0.129	0.253	1.96	0.579	0.735
C08F8.14|C08F8.14	0.366	0.76	2.08	0.574	0.734
C08F8.2|C08F8.2|C08F8.2a	762	901	1.18	0.000403	0.000966
C08F8.2|C08F8.2|C08F8.2b	715	857	1.2	0.000769	0.00178
C08F8.3|C08F8.3|C08F8.3	985	1140	1.16	3.9e-09	1.4e-08
C08F8.6|C08F8.6|C08F8.6	75.7	59.7	0.788	0.00491	0.0104
C08F8.9|C08F8.9|C08F8.9	179	212	1.18	0.212	0.331
C08G5.1|C08G5.1|C08G5.1	0.798	2.55	3.2	0.0815	0.14
C08G5.3|C08G5.3|C08G5.3	9.38	5.63	0.6	0.128	0.212
C08G5.5|C08G5.5|C08G5.5	274	224	0.817	0.00821	0.0168
C08G5.6|C08G5.6|C08G5.6	12.1	11.1	0.921	0.0053	0.0111
C08G5.7|C08G5.7|C08G5.7a	48.9	41.6	0.852	0.0741	0.129
C08G5.7|C08G5.7|C08G5.7b	48.6	40.4	0.83	0.136	0.223
C08G5.9|C08G5.9	0	0	NaN	NA	NA
C08G9.10|C08G9.10	0.112	0	0	1	1
C08G9.1|C08G9.1|C08G9.1	305	243	0.796	1.21e-06	3.66e-06
C08G9.2|C08G9.2|C08G9.2	859	983	1.14	3.31e-75	8.33e-74
C08G9.4|C08G9.4	0	1.27	Inf	0.207	0.323
C08G9.5|C08G9.5	0.524	0.507	0.967	0.848	0.978
C08G9.6|C08G9.6	2.25	0.76	0.337	0.773	0.909
C08G9.7|C08G9.7	0	1.01	Inf	0.305	0.454
C08G9.8|C08G9.8	0	0	NaN	NA	NA
C08G9.9|C08G9.9	0	0	NaN	NA	NA
C08H9.10|C08H9.10|C08H9.10	1.33	2.79	2.09	0.028	0.0528
C08H9.11|C08H9.11|C08H9.11	0.794	0	0	0.691	0.839
C08H9.12|C08H9.12|C08H9.12	1.05	0.253	0.24	0.642	0.794
C08H9.13|C08H9.13|C08H9.13	3.27	2.28	0.698	1	1
C08H9.14|C08H9.14|C08H9.14	0.728	0	0	0.759	0.897
C08H9.15|C08H9.15|C08H9.15	216	177	0.818	0.0496	0.0891
C08H9.16|C08H9.16|C08H9.16	547	863	1.58	8.4e-08	2.76e-07
C08H9.1|C08H9.1|C08H9.1	23.2	15.5	0.665	0.683	0.833
C08H9.2|C08H9.2|C08H9.2a	7180	7840	1.09	7.9e-35	7.92e-34
C08H9.2|C08H9.2|C08H9.2b	11600	12500	1.08	5.33e-63	1.05e-61
C08H9.3|C08H9.3|C08H9.3a	579	539	0.931	2.74e-12	1.18e-11
C08H9.3|C08H9.3|C08H9.3b	229	210	0.915	3.47e-05	9.21e-05
C08H9.4|C08H9.4|C08H9.4a	5.86	9.3	1.59	0.812	0.946
C08H9.4|C08H9.4|C08H9.4b	3.16	1.77	0.56	0.504	0.683
C08H9.6|C08H9.6|C08H9.6	1.93	1.54	0.797	0.376	0.541
C08H9.7|C08H9.7|C08H9.7	1.44	0.76	0.527	0.773	0.909
C08H9.8|C08H9.8	0.244	0	0	1	1
C08H9.9|C08H9.9	2.51	9.3	3.7	0.249	0.38
C09B7.10|C09B7.10	0	0	NaN	NA	NA
C09B7.11|C09B7.11	0	0	NaN	NA	NA
C09B7.12|C09B7.12	0	0.253	Inf	0.519	0.683
C09B7.2|C09B7.2|C09B7.2	489	448	0.918	0.501	0.681
C09B7.3|C09B7.3	0	0	NaN	NA	NA
C09B7.4|C09B7.4	0.234	0	0	1	1
C09B7.5|C09B7.5	0	0.253	Inf	0.519	0.683
C09B7.6|C09B7.6	0.158	0	0	1	1
C09B7.7|C09B7.7	0	0	NaN	NA	NA
C09B7.8|C09B7.8	0	1.29	Inf	0.347	0.504
C09B7.9|C09B7.9	0	0	NaN	NA	NA
C09B8.10|C09B8.10	0.122	0.253	2.08	0.576	0.734
C09B8.11|C09B8.11	0.353	0	0	1	1
C09B8.12|C09B8.12	6.91	3.29	0.477	0.272	0.411
C09B8.13|C09B8.13	0.122	1.54	12.6	0.319	0.473
C09B8.14|C09B8.14	0.353	0	0	1	1
C09B8.15|C09B8.15	0	0	NaN	NA	NA
C09B8.16|C09B8.16	0	0	NaN	NA	NA
C09B8.17|C09B8.17	0	0.253	Inf	0.519	0.683
C09B8.18|C09B8.18	0.784	1.27	1.62	0.393	0.561
C09B8.3|C09B8.3|C09B8.3	130	145	1.12	6.52e-19	3.8e-18
C09B8.4|C09B8.4|C09B8.4	595	525	0.883	6.61e-39	7.37e-38
C09B8.5|C09B8.5|C09B8.5	645	674	1.05	4.2e-10	1.59e-09
C09B8.8|C09B8.8|C09B8.8	12.9	20.8	1.61	6.41e-08	2.12e-07
C09B9.1|C09B9.1|C09B9.1	1.99	1.77	0.891	0.706	0.853
C09B9.2|C09B9.2|C09B9.2	0.521	5.42	10.4	0.0636	0.112
C09B9.3|C09B9.3|C09B9.3a	17.4	25.9	1.48	2.35e-08	7.99e-08
C09B9.3|C09B9.3|C09B9.3b	1.37	0.507	0.369	0.63	0.782
C09B9.4|C09B9.4|C09B9.4	0.28	0	0	1	1
C09B9.7|C09B9.7|C09B9.7	7.79	2.28	0.293	0.00938	0.019
C09B9.80|C09B9.80	1.19	2.32	1.95	0.425	0.597
C09B9.81|C09B9.81	0	0	NaN	NA	NA
C09B9.82|C09B9.82	0.112	0	0	1	1
C09B9.83|C09B9.83	0	0	NaN	NA	NA
C09B9.84|C09B9.84	0.112	0	0	1	1
C09B9.8|C09B9.8|C09B9.8	121	126	1.04	7.31e-17	3.91e-16
C09B9.t1|C09B9.t1	0	1.03	Inf	0.522	0.683
C09C7.2|C09C7.2	0	0	NaN	NA	NA
C09D1.4|C09D1.4	0	0	NaN	NA	NA
C09D1.5|C09D1.5	0	0	NaN	NA	NA
C09D4.1|C09D4.1|C09D4.1a	680	709	1.04	2.21e-14	1.06e-13
C09D4.1|C09D4.1|C09D4.1b	616	649	1.05	7.83e-46	1.04e-44
C09D4.2|C09D4.2|C09D4.2	203	202	0.998	0.00251	0.00549
C09D4.3|C09D4.3|C09D4.3	30	24.6	0.821	0.00173	0.00386
C09D4.4|C09D4.4|C09D4.4a	1470	1570	1.07	2.13e-05	5.78e-05
C09D4.4|C09D4.4|C09D4.4b	1460	1560	1.07	1.65e-05	4.51e-05
C09D4.4|C09D4.4|C09D4.4c	1620	1720	1.06	5.33e-08	1.78e-07
C09D4.6|C09D4.6|C09D4.6	7.22	3.06	0.424	0.028	0.0529
C09D4.8|C09D4.8	0	0	NaN	NA	NA
C09D8.10|C09D8.10	0	0	NaN	NA	NA
C09D8.11|C09D8.11	4.42	1.27	0.286	0.0259	0.049
C09D8.12|C09D8.12	0	0	NaN	NA	NA
C09D8.13|C09D8.13	1.48	0.76	0.513	0.744	0.883
C09D8.14|C09D8.14	2.85	1.77	0.622	1	1
C09D8.15|C09D8.15	0.968	1.77	1.83	0.18	0.287
C09D8.2|C09D8.2	0	0.253	Inf	0.519	0.683
C09D8.3|C09D8.3	0.129	0	0	1	1
C09D8.4|C09D8.4	0.28	0.253	0.905	0.716	0.86
C09D8.5|C09D8.5	0	0.253	Inf	0.519	0.683
C09D8.6|C09D8.6	0	0	NaN	NA	NA
C09D8.7|C09D8.7	3.37	4.83	1.43	0.0587	0.104
C09D8.8|C09D8.8	3.22	4.58	1.42	0.267	0.404
C09D8.9|C09D8.9	0	0	NaN	NA	NA
C09E7.10|C09E7.10|C09E7.10	8.21	14.9	1.82	4.72e-06	1.35e-05
C09E7.4|C09E7.4|C09E7.4	1430	1630	1.14	1.31e-09	4.84e-09
C09E7.5|C09E7.5|C09E7.5	9.22	9.2	0.998	1	1
C09E7.6|C09E7.6|C09E7.6	37.6	48.9	1.3	0.0121	0.024
C09E7.7|C09E7.7|C09E7.7	2610	3200	1.23	1.14e-17	6.32e-17
C09E7.8|C09E7.8|C09E7.8a	628	664	1.06	3.17e-18	1.79e-17
C09E7.8|C09E7.8|C09E7.8b	610	638	1.05	4.25e-17	2.29e-16
C09E7.9|C09E7.9|C09E7.9	407	398	0.977	9.37e-05	0.00024
C09E8.1|C09E8.1|C09E8.1a	1000	1030	1.03	7.79e-10	2.92e-09
C09E8.1|C09E8.1|C09E8.1b	889	895	1.01	6.72e-09	2.38e-08
C09E9.1|C09E9.1|C09E9.1	381	431	1.13	0.171	0.273
C09F12.2|C09F12.2|C09F12.2	21.7	17.8	0.82	0.639	0.791
C09F12.3|C09F12.3|C09F12.3	17	36.7	2.17	3.06e-20	1.89e-19
C09F12.6|C09F12.6	22.3	67	3.01	0.00491	0.0103
C09F5.1|C09F5.1|C09F5.1	1660	1570	0.942	0.0362	0.0669
C09F5.3|C09F5.3|C09F5.3	30.3	37.6	1.24	2.19e-06	6.48e-06
C09F9.1|C09F9.1|C09F9.1	21.4	39.4	1.84	0.531	0.692
C09F9.2|C09F9.2|C09F9.2	5740	6200	1.08	2.35e-53	3.74e-52
C09F9.4|C09F9.4	986	859	0.871	6.05e-34	5.91e-33
C09F9.7|C09F9.7	83.3	120	1.44	8.74e-21	5.53e-20
C09F9.8|C09F9.8	2.57	4.58	1.78	0.0961	0.163
C09G1.2|C09G1.2|C09G1.2	17.9	18.9	1.05	0.000323	0.000782
C09G1.3|C09G1.3|C09G1.3	6.96	8.44	1.21	0.137	0.225
C09G1.4|C09G1.4|C09G1.4	355	339	0.955	1.2e-12	5.29e-12
C09G1.5|C09G1.5|C09G1.5	295	249	0.844	0.0287	0.054
C09G1.6|C09G1.6	0	0.253	Inf	0.519	0.683
C09G12.17|C09G12.17|C09G12.17	3.98	4.37	1.1	0.921	1
C09G12.18|C09G12.18	0	0	NaN	NA	NA
C09G12.19|C09G12.19	32.7	18.1	0.552	0.1	0.17
C09G12.5|C09G12.5|C09G12.5	0	0	NaN	NA	NA
C09G12.t1|C09G12.t1	16.3	9.98	0.61	0.0188	0.0364
C09G4.2|C09G4.2|C09G4.2a	760	801	1.05	6.61e-32	6.07e-31
C09G4.2|C09G4.2|C09G4.2b	1320	1370	1.04	1.95e-45	2.56e-44
C09G4.2|C09G4.2|C09G4.2c	997	1040	1.04	4.13e-42	5e-41
C09G4.2|C09G4.2|C09G4.2d	2380	2440	1.02	1.09e-74	2.73e-73
C09G4.4|C09G4.4|C09G4.4	216	167	0.773	1.42e-11	5.85e-11
C09G5.10|C09G5.10	0	0	NaN	NA	NA
C09G5.11|C09G5.11	0.122	0.253	2.08	0.576	0.734
C09G5.12|C09G5.12	0	0	NaN	NA	NA
C09G5.7|C09G5.7|C09G5.7	24.2	18.5	0.764	0.00321	0.00693
C09G5.8|C09G5.8	27	45.7	1.69	3.41e-05	9.07e-05
C09G5.8|C09G5.8|C09G5.8a	586	733	1.25	2.61e-75	6.57e-74
C09G5.8|C09G5.8|C09G5.8b	506	646	1.28	1.19e-68	2.63e-67
C09G9.1|C09G9.1|C09G9.1	1870	1870	1	0.00229	0.00504
C09G9.2|C09G9.2|C09G9.2a	933	1020	1.09	3.2e-05	8.52e-05
C09G9.2|C09G9.2|C09G9.2b	2740	3010	1.1	1.36e-12	5.93e-12
C09G9.3|C09G9.3|C09G9.3a	22	21.3	0.969	0.0257	0.0487
C09G9.3|C09G9.3|C09G9.3b	20	18.6	0.927	0.123	0.204
C09G9.5|C09G9.5|C09G9.5a	134	140	1.05	6.8e-12	2.86e-11
C09G9.5|C09G9.5|C09G9.5b	64.9	66.8	1.03	3.83e-06	1.11e-05
C09G9.8|C09G9.8|C09G9.8a	0.112	0.253	2.26	0.573	0.733
C09G9.8|C09G9.8|C09G9.8b	0.112	0.507	4.52	0.523	0.683
C09G9.9|C09G9.9	0.112	0	0	1	1
C09H10.10|C09H10.10|C09H10.10	287	264	0.921	0.138	0.227
C09H10.11|C09H10.11	0.27	0.76	2.82	0.495	0.675
C09H10.12|C09H10.12	0.122	0	0	1	1
C09H10.13|C09H10.13	0.615	1.52	2.47	0.207	0.323
C09H10.14|C09H10.14	0	0	NaN	NA	NA
C09H10.15|C09H10.15	0.112	0	0	1	1
C09H10.16|C09H10.16	0	0	NaN	NA	NA
C09H10.17|C09H10.17	0.27	0	0	1	1
C09H10.18|C09H10.18	0.122	0.253	2.08	0.576	0.734
C09H10.5|C09H10.5|C09H10.5	397	477	1.2	0.0577	0.102
C09H10.7|C09H10.7|C09H10.7	581	727	1.25	0.00652	0.0135
C09H10.9|C09H10.9|C09H10.9	13.2	10.5	0.795	0.326	0.479
C09H5.1|C09H5.1|C09H5.1	0	0	NaN	NA	NA
C09H5.7|C09H5.7|C09H5.7	0.129	0.253	1.96	0.579	0.735
C10A4.10|C10A4.10|C10A4.10	43.4	28.2	0.649	0.549	0.711
C10A4.11|C10A4.11	0.122	0	0	1	1
C10A4.12|C10A4.12	0	0	NaN	NA	NA
C10A4.1|C10A4.1|C10A4.1	26.4	28.5	1.08	0.637	0.788
C10A4.2|C10A4.2|C10A4.2	0.129	0.76	5.88	0.442	0.616
C10A4.3|C10A4.3|C10A4.3	174	145	0.836	0.0835	0.143
C10A4.4|C10A4.4|C10A4.4	0.356	0.76	2.13	0.575	0.734
C10A4.5|C10A4.5|C10A4.5	74.7	87.3	1.17	5.54e-09	1.97e-08
C10A4.6|C10A4.6|C10A4.6	0.658	0.76	1.16	0.77	0.907
C10A4.7|C10A4.7|C10A4.7	6.72	5.89	0.876	0.422	0.594
C10A4.9|C10A4.9|C10A4.9	0.784	1.01	1.29	0.635	0.786
C10B5.1|C10B5.1|C10B5.1	113	210	1.86	0.000215	0.000532
C10B5.3|C10B5.3|C10B5.3	191	187	0.978	0.0248	0.0472
C10B5.4|C10B5.4	0	0	NaN	NA	NA
C10C5.10|C10C5.10	0.112	0	0	1	1
C10C5.11|C10C5.11	0	0	NaN	NA	NA
C10C5.1|C10C5.1|C10C5.1a	1070	1430	1.33	0.00253	0.00554
C10C5.1|C10C5.1|C10C5.1b	1060	1420	1.34	0.00293	0.00637
C10C5.1|C10C5.1|C10C5.1c	1090	1460	1.33	0.00322	0.00696
C10C5.2|C10C5.2|C10C5.2	22.7	30.3	1.33	4.46e-06	1.28e-05
C10C5.3|C10C5.3|C10C5.3	480	566	1.18	0.0168	0.0327
C10C5.4|C10C5.4|C10C5.4	384	385	1	0.00189	0.00421
C10C5.5|C10C5.5|C10C5.5	482	559	1.16	2.22e-05	6e-05
C10C5.7|C10C5.7|C10C5.7	12.5	9.88	0.791	0.635	0.786
C10C5.9|C10C5.9	0.122	0	0	1	1
C10C6.11|C10C6.11	4.97	8.4	1.69	0.033	0.0615
C10C6.12|C10C6.12	0	0	NaN	NA	NA
C10C6.3|C10C6.3|C10C6.3	2.46	1.54	0.627	0.943	1
C10C6.6|C10C6.6|C10C6.6	9000	8780	0.976	4.79e-52	7.36e-51
C10C6.7|C10C6.7|C10C6.7a	53.3	57.1	1.07	0.641	0.793
C10C6.7|C10C6.7|C10C6.7b	83	84.5	1.02	0.179	0.285
C10C6.8|C10C6.8	3.84	6.1	1.59	0.0625	0.11
C10C6.9|C10C6.9	134	161	1.21	0.939	1
C10E2.1|C10E2.1|C10E2.1	4.39	6.94	1.58	1	1
C10E2.2|C10E2.2|C10E2.2	150	164	1.09	1.83e-21	1.18e-20
C10E2.4|C10E2.4|C10E2.4	20.9	32	1.53	0.00174	0.00389
C10E2.5|C10E2.5|C10E2.5	14.9	18.9	1.27	0.0216	0.0414
C10E2.6|C10E2.6|C10E2.6	4650	4650	1	1.04e-50	1.54e-49
C10E2.7|C10E2.7	0.112	0	0	1	1
C10E2.8|C10E2.8	0	0	NaN	NA	NA
C10F3.10|C10F3.10	0	0	NaN	NA	NA
C10F3.11|C10F3.11	0	0	NaN	NA	NA
C10F3.12|C10F3.12	0	0	NaN	NA	NA
C10F3.13|C10F3.13	0	0.253	Inf	0.519	0.683
C10F3.14|C10F3.14	0.27	0.253	0.939	0.708	0.853
C10F3.15|C10F3.15	0.112	0	0	1	1
C10F3.16|C10F3.16	0.363	1.79	4.94	0.314	0.466
C10F3.17|C10F3.17	0.112	0	0	1	1
C10F3.4|C10F3.4|C10F3.4a	1130	1190	1.05	8.41e-10	3.14e-09
C10F3.4|C10F3.4|C10F3.4b	614	657	1.07	2.4e-05	6.47e-05
C10F3.7|C10F3.7|C10F3.7	632	384	0.608	0.787	0.923
C10F3.9|C10F3.9	0	0	NaN	NA	NA
C10G11.10|C10G11.10|C10G11.10	6.59	7.99	1.21	0.726	0.867
C10G11.12|C10G11.12	0.234	0	0	1	1
C10G11.13|C10G11.13	0	0	NaN	NA	NA
C10G11.14|C10G11.14	7.46	7.91	1.06	0.247	0.378
C10G11.15|C10G11.15	1.57	7.95	5.06	0.00318	0.00687
C10G11.16|C10G11.16	0	0	NaN	NA	NA
C10G11.17|C10G11.17	1.48	2.83	1.91	1	1
C10G11.1|C10G11.1|C10G11.1	8.34	7.74	0.927	0.895	1
C10G11.6|C10G11.6|C10G11.6	579	814	1.41	1.38e-10	5.39e-10
C10G11.7|C10G11.7|C10G11.7	24800	21500	0.866	0	0
C10G11.8|C10G11.8|C10G11.8	2.01	2.57	1.28	0.731	0.871
C10G11.9|C10G11.9|C10G11.9	10.1	6.66	0.662	0.218	0.339
C10G6.51|C10G6.51	0.234	0.253	1.08	0.682	0.832
C10G6.52|C10G6.52	0.234	0.253	1.08	0.682	0.832
C10G6.53|C10G6.53	0	0	NaN	NA	NA
C10G8.2|C10G8.2|C10G8.2	2.57	4.37	1.7	0.956	1
C10G8.3|C10G8.3|C10G8.3	4.23	4.85	1.15	0.522	0.683
C10G8.4|C10G8.4|C10G8.4	2.11	0.507	0.24	0.225	0.35
C10G8.8|C10G8.8|C10G8.8a	843	919	1.09	3.19e-21	2.05e-20
C10G8.8|C10G8.8|C10G8.8b	1460	1590	1.09	6.56e-32	6.03e-31
C10G8.9|C10G8.9	0.336	9.55	28.4	0.000615	0.00144
C10G8.t1|C10G8.t1	0.336	9.55	28.4	0.000615	0.00144
C10H11.11|C10H11.11	1.97	1.01	0.516	0.633	0.785
C10H11.12|C10H11.12	8.15	2.28	0.28	0.0196	0.0379
C10H11.13|C10H11.13	0.316	0.253	0.802	0.743	0.883
C10H11.14|C10H11.14	1.22	0.253	0.208	0.371	0.535
C10H11.7|C10H11.7|C10H11.7	5.93	1.01	0.171	0.0161	0.0315
C10H11.8|C10H11.8|C10H11.8	556	577	1.04	0.427	0.6
C11D2.100|C11D2.100	0.112	0	0	1	1
C11D2.101|C11D2.101	0	0	NaN	NA	NA
C11D2.1|C11D2.1|C11D2.1	0	0	NaN	NA	NA
C11D2.2|C11D2.2|C11D2.2	26.2	24.7	0.942	0.0864	0.148
C11D2.3|C11D2.3|C11D2.3	17.6	33.8	1.91	1.08e-05	3e-05
C11D2.4|C11D2.4|C11D2.4	1380	1580	1.15	0.907	1
C11D2.7|C11D2.7|C11D2.7	1440	1260	0.874	1.54e-25	1.15e-24
C11D2.98|C11D2.98	0	0	NaN	NA	NA
C11D2.99|C11D2.99	0	0	NaN	NA	NA
C11E4.10|C11E4.10	0	0	NaN	NA	NA
C11E4.11|C11E4.11	0	0.76	Inf	0.401	0.57
C11E4.12|C11E4.12	0.482	1.27	2.63	0.337	0.492
C11E4.13|C11E4.13	0.251	0.253	1.01	0.694	0.842
C11E4.14|C11E4.14	0.129	0	0	1	1
C11E4.15|C11E4.15	0	0	NaN	NA	NA
C11E4.16|C11E4.16	0.251	0.253	1.01	0.694	0.842
C11E4.17|C11E4.17	1.42	0.76	0.537	0.773	0.909
C11E4.1|C11E4.1|C11E4.1	357	323	0.906	0.00184	0.00409
C11E4.2|C11E4.2|C11E4.2	95.8	83.3	0.87	0.0207	0.0398
C11E4.6|C11E4.6|C11E4.6	2420	2610	1.08	1.18e-193	1.1e-191
C11E4.7|C11E4.7|C11E4.7	4.19	4.07	0.972	0.191	0.302
C11E4.8|C11E4.8|C11E4.8	9.57	14.5	1.51	0.000198	0.000492
C11E4.9|C11E4.9	0.371	0	0	1	1
C11E4.t1|C11E4.t1	0.241	4.89	20.3	0.00504	0.0106
C11G10.10|C11G10.10	0	0	NaN	NA	NA
C11G10.11|C11G10.11	0.129	0	0	1	1
C11G10.12|C11G10.12	0	0	NaN	NA	NA
C11G10.13|C11G10.13	0	0.253	Inf	0.519	0.683
C11G10.1|C11G10.1|C11G10.1	29.3	40.1	1.37	3.05e-11	1.24e-10
C11G10.2|C11G10.2|C11G10.2	16.2	21.8	1.35	4.13e-06	1.19e-05
C11G10.3|C11G10.3	0	0.253	Inf	0.519	0.683
C11G10.4|C11G10.4	0	0	NaN	NA	NA
C11G10.5|C11G10.5	0	0	NaN	NA	NA
C11G10.6|C11G10.6	0	0	NaN	NA	NA
C11G10.7|C11G10.7	0	0	NaN	NA	NA
C11G10.8|C11G10.8	0	0	NaN	NA	NA
C11G10.9|C11G10.9	0.381	0	0	1	1
C11G10.t1|C11G10.t1	0.363	3.35	9.23	0.194	0.305
C11G6.2|C11G6.2|C11G6.2	87.2	99.5	1.14	1.75e-06	5.21e-06
C11G6.3|C11G6.3|C11G6.3	977	1360	1.39	0.00655	0.0136
C11G6.5|C11G6.5	0.224	0	0	1	1
C11G6.6|C11G6.6	0	0	NaN	NA	NA
C11H1.10|C11H1.10	0.129	0	0	1	1
C11H1.11|C11H1.11	0	0	NaN	NA	NA
C11H1.2|C11H1.2|C11H1.2	793	714	0.901	5.23e-08	1.74e-07
C11H1.3|C11H1.3|C11H1.3	1430	1580	1.1	0.0019	0.00422
C11H1.5|C11H1.5|C11H1.5	19.5	19.4	0.997	0.195	0.307
C11H1.7|C11H1.7|C11H1.7	308	338	1.1	0.00526	0.011
C11H1.8|C11H1.8|C11H1.8	375	375	1	0.0275	0.0519
C11H1.9|C11H1.9|C11H1.9a	760	776	1.02	5.63e-07	1.74e-06
C11H1.9|C11H1.9|C11H1.9b	691	699	1.01	3.18e-06	9.28e-06
C12C8.2|C12C8.2|C12C8.2a	351	377	1.07	5.53e-13	2.47e-12
C12C8.2|C12C8.2|C12C8.2b	170	207	1.22	1.11e-10	4.35e-10
C12C8.5|C12C8.5	1.3	21.2	16.3	3.01e-06	8.81e-06
C12C8.6|C12C8.6	0	0	NaN	NA	NA
C12C8.7|C12C8.7	1.3	21.2	16.3	3.01e-06	8.81e-06
C12C8.t1|C12C8.t1	0.949	18.1	19	3.72e-06	1.07e-05
C12C8.t2|C12C8.t2	0.949	18.1	19	3.72e-06	1.07e-05
C12C8.t3|C12C8.t3	0.949	18.1	19	3.72e-06	1.07e-05
C12C8.t4|C12C8.t4	0.949	18.1	19	3.72e-06	1.07e-05
C12C8.t5|C12C8.t5	0.949	18.1	19	3.72e-06	1.07e-05
C12C8.t6|C12C8.t6	0.949	18.1	19	3.72e-06	1.07e-05
C12D12.10|C12D12.10	0	0	NaN	NA	NA
C12D12.1|C12D12.1|C12D12.1a	676	703	1.04	2.94e-52	4.55e-51
C12D12.1|C12D12.1|C12D12.1b	567	608	1.07	1.41e-53	2.25e-52
C12D12.1|C12D12.1|C12D12.1c	690	726	1.05	1.15e-56	1.97e-55
C12D12.3|C12D12.3|C12D12.3	66.7	55.2	0.827	0.113	0.19
C12D12.4|C12D12.4|C12D12.4	0	0	NaN	NA	NA
C12D12.7|C12D12.7	2.21	4.11	1.86	0.914	1
C12D12.9|C12D12.9	0	0	NaN	NA	NA
C12D5.10|C12D5.10|C12D5.10	12.8	3.57	0.279	9.67e-05	0.000247
C12D5.3|C12D5.3|C12D5.3	10.9	12.2	1.12	0.0566	0.101
C12D5.4|C12D5.4|C12D5.4	3.67	3.57	0.971	0.892	1
C12D5.5|C12D5.5|C12D5.5	1.84	1.77	0.963	0.603	0.757
C12D5.9|C12D5.9|C12D5.9	34.8	8.17	0.234	1.73e-12	7.49e-12
C12D8.13|C12D8.13|C12D8.13	1.93	1.01	0.526	0.864	0.991
C12D8.15|C12D8.15|C12D8.15	13.5	14.7	1.09	0.00868	0.0177
C12D8.1|C12D8.1	2330	2420	1.04	6.38e-08	2.11e-07
C12D8.1|C12D8.1|C12D8.1a	2450	2600	1.06	1.09e-06	3.29e-06
C12D8.1|C12D8.1|C12D8.1b	2570	2780	1.08	0.00681	0.0141
C12D8.1|C12D8.1|C12D8.1c	7190	7580	1.05	4.02e-17	2.17e-16
C12D8.20|C12D8.20|C12D8.20	0.287	0.253	0.882	0.721	0.863
C12D8.21|C12D8.21|C12D8.21a	4.39	5.87	1.34	0.388	0.555
C12D8.21|C12D8.21|C12D8.21b	0.122	0.76	6.23	0.444	0.619
C12D8.22|C12D8.22	0	1.03	Inf	0.522	0.683
C12D8.23|C12D8.23	0	0	NaN	NA	NA
C12D8.24|C12D8.24	0.158	1.03	6.54	0.734	0.874
C12D8.25|C12D8.25	0	0	NaN	NA	NA
C12D8.2|C12D8.2	0.122	1.03	8.46	0.718	0.861
C12D8.3|C12D8.3	0.316	1.03	3.27	0.965	1
C12D8.7|C12D8.7	0.557	0.253	0.455	1	1
C12D8.9|C12D8.9|C12D8.9a	0.438	0	0	1	1
C12D8.9|C12D8.9|C12D8.9b	0.438	0	0	1	1
C13A10.1|C13A10.1|C13A10.1	21.2	49.8	2.35	5.83e-26	4.4e-25
C13A10.2|C13A10.2|C13A10.2	107	106	0.987	1.62e-08	5.57e-08
C13A10.4|C13A10.4	1.06	8.52	8.02	0.0474	0.0855
C13A10.5|C13A10.5	0.366	1.29	3.51	0.78	0.915
C13A2.10|C13A2.10|C13A2.10	8.66	11.1	1.29	4.05e-05	0.000107
C13A2.11|C13A2.11|C13A2.11	0.521	0.76	1.46	0.662	0.814
C13A2.12|C13A2.12|C13A2.12	2.47	3.55	1.43	0.00833	0.017
C13A2.1|C13A2.1|C13A2.1	1.01	2.53	2.5	0.0228	0.0435
C13A2.2|C13A2.2|C13A2.2	0	0	NaN	NA	NA
C13A2.3|C13A2.3|C13A2.3	19.5	24.4	1.25	1.94e-09	7.09e-09
C13A2.4|C13A2.4|C13A2.4	0	0	NaN	NA	NA
C13A2.5|C13A2.5|C13A2.5	4.71	6.61	1.4	0.000136	0.000342
C13A2.6|C13A2.6|C13A2.6	0.129	0.76	5.88	0.442	0.616
C13A2.7|C13A2.7|C13A2.7	0.158	1.79	11.4	0.175	0.279
C13A2.7|C13A2.7|C13A2.7b	0.438	1.29	2.94	0.791	0.926
C13A2.8|C13A2.8	0	0	NaN	NA	NA
C13A2.9|C13A2.9|C13A2.9	0.122	0.507	4.15	0.522	0.683
C13B4.1|C13B4.1|C13B4.1a	702	945	1.35	1.4e-07	4.55e-07
C13B4.1|C13B4.1|C13B4.1b	1370	1860	1.36	4.86e-15	2.41e-14
C13B4.5|C13B4.5	0.448	9.55	21.3	0.00162	0.00362
C13B4.6|C13B4.6	0	0	NaN	NA	NA
C13B4.t1|C13B4.t1	0.336	9.55	28.4	0.000615	0.00144
C13B7.6|C13B7.6|C13B7.6	368	544	1.48	4.86e-16	2.51e-15
C13B9.2|C13B9.2|C13B9.2	283	254	0.895	1.38e-10	5.4e-10
C13B9.3|C13B9.3|C13B9.3	2130	2360	1.11	0.048	0.0865
C13B9.5|C13B9.5	0.112	0	0	1	1
C13C12.2|C13C12.2|C13C12.2	547	537	0.981	8.59e-20	5.19e-19
C13C12.4|C13C12.4	0	0	NaN	NA	NA
C13C12.5|C13C12.5	0	0	NaN	NA	NA
C13C12.6|C13C12.6	5.37	8.67	1.62	0.0408	0.0746
C13C4.10|C13C4.10	0	1.03	Inf	0.522	0.683
C13C4.11|C13C4.11	1.4	1.29	0.92	1	1
C13C4.12|C13C4.12	0.622	0.507	0.815	0.983	1
C13C4.4|C13C4.4|C13C4.4	295	367	1.25	0.00727	0.015
C13C4.5|C13C4.5|C13C4.5	1080	1320	1.22	2.32e-70	5.34e-69
C13C4.6|C13C4.6|C13C4.6	66.5	50.6	0.76	0.504	0.683
C13C4.7|C13C4.7|C13C4.7	64.2	50.9	0.793	0.0577	0.103
C13C4.8|C13C4.8|C13C4.8	3.89	4.81	1.24	0.0214	0.0412
C13C4.9|C13C4.9	0.353	0.253	0.717	1	1
C13D9.13|C13D9.13	0.112	1.54	13.7	0.324	0.477
C13E3.1|C13E3.1|C13E3.1	556	695	1.25	3.11e-45	4.08e-44
C13F10.1|C13F10.1|C13F10.1a	183	159	0.871	0.0102	0.0206
C13F10.1|C13F10.1|C13F10.1b	112	104	0.925	0.0141	0.0278
C13F10.2|C13F10.2|C13F10.2	347	359	1.04	0.0587	0.104
C13F10.4|C13F10.4|C13F10.4	4600	5670	1.23	1.38e-06	4.16e-06
C13F10.5|C13F10.5|C13F10.5	499	495	0.992	0.00799	0.0163
C13F10.6|C13F10.6|C13F10.6	1170	1230	1.06	0.00176	0.00392
C13F10.7|C13F10.7|C13F10.7	2020	2060	1.02	1.19e-10	4.65e-10
C13G3.10|C13G3.10	0	0	NaN	NA	NA
C13G3.11|C13G3.11	0	0	NaN	NA	NA
C13G3.1|C13G3.1|C13G3.1	113	140	1.24	2.8e-14	1.33e-13
C13G3.4|C13G3.4	0	0	NaN	NA	NA
C13G3.5|C13G3.5	0	0	NaN	NA	NA
C13G3.6|C13G3.6	0	0.253	Inf	0.519	0.683
C13G3.7|C13G3.7	0	0	NaN	NA	NA
C13G3.8|C13G3.8	0.244	0.253	1.04	0.689	0.837
C13G3.9|C13G3.9	0	0	NaN	NA	NA
C13G5.2|C13G5.2|C13G5.2	610	717	1.17	0.0174	0.0338
C13G5.3|C13G5.3	0	0	NaN	NA	NA
C14A11.10|C14A11.10	0.597	1.01	1.7	0.566	0.73
C14A11.11|C14A11.11	17.5	25.3	1.45	0.0547	0.0977
C14A11.2|C14A11.2|C14A11.2	386	342	0.886	5.26e-10	1.99e-09
C14A11.5|C14A11.5|C14A11.5	167	228	1.37	4.49e-45	5.85e-44
C14A11.6|C14A11.6|C14A11.6	71.3	91.8	1.29	6.51e-18	3.63e-17
C14A11.9|C14A11.9|C14A11.9	454	480	1.06	0.0314	0.0587
C14A4.11|C14A4.11|C14A4.11	2740	3140	1.15	0.000186	0.000462
C14A4.12|C14A4.12|C14A4.12a	330	396	1.2	5.31e-41	6.25e-40
C14A4.12|C14A4.12|C14A4.12b	304	372	1.22	2.86e-40	3.31e-39
C14A4.13|C14A4.13|C14A4.13	16.3	14.7	0.904	0.162	0.261
C14A4.14|C14A4.14|C14A4.14	1510	1860	1.23	3.24e-11	1.31e-10
C14A4.3|C14A4.3|C14A4.3	1200	1280	1.07	0.738	0.878
C14A4.6|C14A4.6|C14A4.6	539	456	0.846	0.0023	0.00506
C14A4.7|C14A4.7|C14A4.7a	163	130	0.801	0.324	0.477
C14A4.7|C14A4.7|C14A4.7b	75.3	62.6	0.832	0.538	0.699
C14A4.8|C14A4.8|C14A4.8	5.25	7.11	1.35	0.00507	0.0106
C14A4.9|C14A4.9|C14A4.9	1130	803	0.713	0.152	0.247
C14A6.10|C14A6.10	8.54	11.7	1.37	0.0248	0.0472
C14A6.12|C14A6.12|C14A6.12	0	0	NaN	NA	NA
C14A6.13|C14A6.13|C14A6.13	0.632	3.35	5.31	0.305	0.455
C14A6.14|C14A6.14	0.373	0	0	1	1
C14A6.15|C14A6.15	8.08	5.4	0.668	0.144	0.235
C14A6.2|C14A6.2|C14A6.2	4.51	8.17	1.81	0.0622	0.11
C14A6.3|C14A6.3|C14A6.3	1.16	1.52	1.31	0.527	0.686
C14A6.5|C14A6.5|C14A6.5	0	0.253	Inf	0.519	0.683
C14A6.6|C14A6.6|C14A6.6	0.892	0.253	0.284	0.833	0.965
C14A6.7|C14A6.7|C14A6.7	0.259	0	0	1	1
C14A6.8|C14A6.8|C14A6.8	3.15	0.507	0.161	0.09	0.153
C14A6.9|C14A6.9	0.54	2.05	3.79	0.175	0.28
[truncated: 32,874 more rows]

## Sheet: Embryo stage N2_vs_ADAR,rde-4
Gene ID	Normalized mean counts wildtype	Normalized mean counts ADAR;rde-4 mutants	foldChange ADAR;rde-4 mutant/wildtype	pval	padj
2L52.1|2L52.1|2L52.1	897	985	1.098	0.2	0.311
2L52.2|2L52.2	86.2	119	1.382	6.86e-14	3.23e-13
2RSSE.1|2RSSE.1|2RSSE.1	1280	984	0.7699	7.31e-39	9.58e-38
2RSSE.2|2RSSE.2|2RSSE.2	588	674	1.1474	6.96e-09	2.44e-08
2RSSE.3|2RSSE.3	427	429	1.0037	2.93e-08	9.83e-08
2RSSE.4|2RSSE.4	0	0	NaN	NA	NA
2RSSE.5|2RSSE.5	101	139	1.3781	6.65e-16	3.48e-15
2RSSE.6|2RSSE.6	13.3	10.2	0.7684	0.453	0.622
2RSSE.7|2RSSE.7	98.6	140	1.4177	8.07e-18	4.62e-17
2RSSE.8|2RSSE.8	0.106	0	0	1	1
3R5.2|3R5.2	241	315	1.3073	0.265	0.397
4R79.2|4R79.2|4R79.2a	69.5	73.4	1.0566	2.42e-14	1.17e-13
4R79.2|4R79.2|4R79.2b	67.4	70.7	1.0497	7.66e-14	3.59e-13
6R55.2|6R55.2|6R55.2	2.67	3.6	1.3504	0.655	0.791
AC3.11|AC3.11	0	0	NaN	NA	NA
AC3.12|AC3.12	0	0	NaN	NA	NA
AC3.13|AC3.13	16.5	44.7	2.7156	0.0423	0.0765
AC3.14|AC3.14	1.12	0.894	0.7977	0.983	1
AC3.15|AC3.15	0	0	NaN	NA	NA
AC3.16|AC3.16	6.99	2.9	0.4155	0.209	0.324
AC3.5|AC3.5|AC3.5	53.3	679	12.7539	0	0
AC3.9|AC3.9	307	377	1.226	0.644	0.785
AC7.3|AC7.3|AC7.3	0.123	0.223	1.8214	0.539	0.685
AC8.10|AC8.10|AC8.10	195	226	1.1614	7.47e-10	2.79e-09
AC8.11|AC8.11|AC8.11	116	228	1.9673	5.75e-13	2.57e-12
AC8.12|AC8.12|AC8.12	91	90.5	0.995	6.45e-08	2.11e-07
AC8.2|AC8.2	9.97	8.55	0.8575	1	1
AC8.3|AC8.3|AC8.3	195	226	1.1614	7.47e-10	2.79e-09
AC8.4|AC8.4|AC8.4	116	228	1.9673	5.75e-13	2.57e-12
AC8.5|AC8.5	234	540	2.3036	0.00703	0.0144
AC8.6|AC8.6	72.9	94.3	1.2947	0.0551	0.0976
AC8.7|AC8.7|AC8.7	91	90.5	0.995	6.45e-08	2.11e-07
AC8.9|AC8.9	110	138	1.2535	0.0174	0.0336
AH10.2|AH10.2|AH10.2	63.4	18.4	0.29	5.5e-12	2.32e-11
AH10.3|AH10.3|AH10.3	69.5	67.5	0.971	0.0129	0.0254
AH10.4|AH10.4|AH10.4	9.59	14.9	1.5562	0.442	0.609
AH10.7|AH10.7	0	0	NaN	NA	NA
AH10.8|AH10.8	0.592	0.223	0.3774	1	1
AH10.9|AH10.9	0	0	NaN	NA	NA
AH6.3|AH6.3|AH6.3	1.38	2.49	1.8061	0.215	0.332
AH9.1|AH9.1|AH9.1	97.7	82.6	0.8455	0.0767	0.132
AH9.3|AH9.3|AH9.3	799	882	1.1047	6.7e-06	1.89e-05
AH9.4|AH9.4|AH9.4	17.1	20.2	1.1773	0.000348	0.000831
AH9.6|AH9.6|AH9.6	80.5	79.2	0.9838	4.7e-10	1.77e-09
AH9.7|AH9.7|AH9.7	98.5	84.3	0.8556	0.702	0.833
B0001.10|B0001.10	0.38	0	0	1	1
B0001.11|B0001.11	1.55	3.13	2.018	0.0116	0.0231
B0001.12|B0001.12	3.65	7.94	2.1773	0.34	0.493
B0001.2|B0001.2|B0001.2	750	830	1.1078	9.78e-05	0.000247
B0001.3|B0001.3|B0001.3a	852	967	1.1351	0.367	0.527
B0001.3|B0001.3|B0001.3b	816	947	1.1601	0.235	0.359
B0001.4|B0001.4|B0001.4	664	564	0.8502	0.000625	0.00146
B0001.5|B0001.5|B0001.5	900	999	1.1105	0.0072	0.0148
B0001.6|B0001.6|B0001.6	4940	6010	1.2171	0.746	0.878
B0001.7|B0001.7|B0001.7	1120	1190	1.0629	8.97e-27	7.8e-26
B0001.8|B0001.8|B0001.8	2590	3110	1.2009	0.00753	0.0154
B0019.2|B0019.2|B0019.2	1760	1950	1.1092	0.213	0.329
B0024.10|B0024.10|B0024.10	1280	1670	1.3018	8.9e-13	3.93e-12
B0024.11|B0024.11|B0024.11	935	1260	1.3478	5.64e-05	0.000146
B0024.13|B0024.13|B0024.13a	316	332	1.0526	0.0384	0.07
B0024.13|B0024.13|B0024.13b	292	317	1.0852	0.063	0.11
B0024.15|B0024.15|B0024.15	41.6	41.5	0.9996	4.77e-09	1.69e-08
B0024.17|B0024.17	0.229	0.67	2.9319	0.484	0.638
B0024.18|B0024.18	0	0	NaN	NA	NA
B0024.3|B0024.3|B0024.3	112	79.2	0.7073	0.531	0.683
B0024.4|B0024.4|B0024.4	48.6	195	4.0236	3.88e-229	5.46e-227
B0025.4|B0025.4|B0025.4	889	979	1.101	3.71e-10	1.41e-09
B0025.5|B0025.5|B0025.5	3.23	0.447	0.1384	0.0135	0.0265
B0025.6|B0025.6	0	0	NaN	NA	NA
B0034.10|B0034.10	0	0	NaN	NA	NA
B0034.11|B0034.11	0	0.447	Inf	0.436	0.602
B0034.12|B0034.12	0.123	0	0	1	1
B0034.13|B0034.13	0.858	5.23	6.091	0.416	0.582
B0034.14|B0034.14	0	0	NaN	NA	NA
B0034.15|B0034.15	0	0	NaN	NA	NA
B0034.16|B0034.16	0.229	0.447	1.9546	0.568	0.711
B0034.17|B0034.17	1.23	0.894	0.7291	1	1
B0034.1|B0034.1|B0034.1	145	125	0.8652	2.76e-08	9.27e-08
B0034.2|B0034.2|B0034.2	0	0	NaN	NA	NA
B0034.4|B0034.4|B0034.4	6.9	17.3	2.503	1.37e-10	5.32e-10
B0034.5|B0034.5|B0034.5	39.6	25.1	0.6335	0.866	0.983
B0034.7|B0034.7|B0034.7	87.4	74.2	0.8491	0.000197	0.000483
B0034.8|B0034.8	0.106	0	0	1	1
B0034.9|B0034.9	0	0.447	Inf	0.436	0.602
B0035.11|B0035.11|B0035.11	2830	4320	1.526	0.00205	0.00451
B0035.12|B0035.12|B0035.12	2860	3820	1.336	2.52e-08	8.47e-08
B0035.13|B0035.13|B0035.13	65.5	55	0.8409	0.00038	0.000905
B0035.15|B0035.15|B0035.15	494	373	0.7556	0.017	0.0329
B0035.16|B0035.16|B0035.16	341	206	0.6046	6.18e-13	2.76e-12
B0035.18|B0035.18|B0035.18	104	120	1.1557	0.000543	0.00127
B0035.19|B0035.19	0	0.447	Inf	0.436	0.602
B0035.1|B0035.1|B0035.1a	1360	1350	0.9964	4.62e-28	4.22e-27
B0035.1|B0035.1|B0035.1b	1730	1860	1.0722	2.91e-28	2.68e-27
B0035.3|B0035.3|B0035.3	369	367	0.9947	0.00737	0.0151
B0035.6|B0035.6|B0035.6	1110	1550	1.3992	0.0124	0.0246
B0041.10|B0041.10	0.212	0	0	1	1
B0041.1|B0041.1|B0041.1	15.8	6.31	0.4002	0.057	0.101
B0041.3|B0041.3|B0041.3	260	239	0.9168	0.988	1
B0041.5|B0041.5|B0041.5	893	757	0.8473	5.87e-06	1.67e-05
B0041.8|B0041.8|B0041.8	1570	1890	1.2029	8.85e-31	8.87e-30
B0041.9|B0041.9	0	0	NaN	NA	NA
B0198.10|B0198.10	0	0	NaN	NA	NA
B0198.2|B0198.2|B0198.2a	43.4	55.2	1.272	3.6e-11	1.45e-10
B0198.2|B0198.2|B0198.2b	28.5	44	1.5446	1.31e-08	4.52e-08
B0198.3|B0198.3	43.4	47.2	1.0877	0.0363	0.0663
B0198.3|B0198.3|B0198.3a	468	453	0.9667	1.2e-10	4.68e-10
B0198.4|B0198.4	0	0	NaN	NA	NA
B0198.5|B0198.5	0	0.447	Inf	0.436	0.602
B0198.6|B0198.6	0	0.223	Inf	0.472	0.63
B0198.7|B0198.7	0	0.223	Inf	0.472	0.63
B0198.8|B0198.8	0	0	NaN	NA	NA
B0198.9|B0198.9	0	1.82	Inf	0.232	0.355
B0205.10|B0205.10|B0205.10	9.56	11.3	1.1802	0.609	0.75
B0205.11|B0205.11|B0205.11	861	695	0.8065	2.36e-24	1.85e-23
B0205.12|B0205.12|B0205.12	72.5	80.1	1.1058	0.517	0.67
B0205.13|B0205.13|B0205.13	26.5	33.8	1.2756	6.68e-08	2.18e-07
B0205.14|B0205.14|B0205.14	1.43	7.85	5.4982	6.93e-09	2.43e-08
B0205.15|B0205.15	0	3.19	Inf	0.15	0.242
B0205.16|B0205.16	0.151	0.447	2.95	0.486	0.638
B0205.1|B0205.1|B0205.1a	1440	1290	0.8982	2.43e-20	1.58e-19
B0205.1|B0205.1|B0205.1b	3250	2890	0.8879	7.85e-49	1.34e-47
B0205.4|B0205.4|B0205.4	283	256	0.903	9.19e-05	0.000233
B0205.5|B0205.5|B0205.5	5.09	3.6	0.7075	1	1
B0205.6|B0205.6|B0205.6	682	684	1.0032	0.0497	0.0887
B0205.8|B0205.8|B0205.8	369	872	2.3607	2.04e-08	6.93e-08
B0205.9|B0205.9|B0205.9	1190	1590	1.3281	0.0103	0.0206
B0207.10|B0207.10|B0207.10	6.28	2.68	0.4267	0.456	0.625
B0207.11|B0207.11|B0207.11	0.94	1.34	1.4254	0.229	0.351
B0207.13|B0207.13	7.04	8.77	1.2453	0.188	0.294
B0207.14|B0207.14	0.363	1.59	4.3861	1	1
B0207.15|B0207.15	0.115	0.223	1.9445	0.536	0.685
B0207.16|B0207.16	0	0	NaN	NA	NA
B0207.1|B0207.1|B0207.1	2.25	1.34	0.5957	0.84	0.959
B0207.2|B0207.2|B0207.2	99.8	117	1.1723	1.52e-05	4.15e-05
B0207.5|B0207.5|B0207.5	104	112	1.0721	0.0803	0.138
B0207.6|B0207.6|B0207.6	373	517	1.3891	0.0218	0.0416
B0207.7|B0207.7|B0207.7	2.75	1.34	0.4883	0.438	0.605
B0207.8|B0207.8|B0207.8	0.318	1.12	3.5146	0.333	0.483
B0207.9|B0207.9|B0207.9	0.363	0	0	1	1
B0212.3|B0212.3|B0212.3	752	696	0.9261	0.286	0.425
B0212.4|B0212.4|B0212.4a	133	119	0.8941	0.00239	0.00521
B0212.4|B0212.4|B0212.4b	125	111	0.8898	0.00743	0.0152
B0212.4|B0212.4|B0212.4c	143	126	0.8802	0.00245	0.00535
B0212.6|B0212.6|B0212.6	23.6	27.2	1.1532	0.00399	0.00849
B0212.7|B0212.7	0	0	NaN	NA	NA
B0212.8|B0212.8	0	0	NaN	NA	NA
B0212.9|B0212.9	0	0.223	Inf	0.472	0.63
B0212.t1|B0212.t1	0	0	NaN	NA	NA
B0213.18|B0213.18	0.592	0.67	1.1322	0.756	0.887
B0213.21|B0213.21	0	0.223	Inf	0.472	0.63
B0213.22|B0213.22	0.106	0.894	8.4351	0.346	0.501
B0213.23|B0213.23	0	0	NaN	NA	NA
B0213.24|B0213.24	4.28	10.4	2.4349	0.731	0.863
B0213.25|B0213.25	0	0	NaN	NA	NA
B0218.5|B0218.5|B0218.5	6.45	22.9	3.557	1.25e-13	5.8e-13
B0218.7|B0218.7|B0218.7	0.683	0.67	0.9813	0.76	0.888
B0222.10|B0222.10|B0222.10	1.5	2.01	1.3391	0.181	0.286
B0222.11|B0222.11|B0222.11	4.81	8.71	1.8122	3.35e-05	8.85e-05
B0222.14|B0222.14	0.372	0.67	1.8003	0.557	0.703
B0222.1|B0222.1|B0222.1	28.2	32	1.1357	6.08e-07	1.86e-06
B0222.2|B0222.2|B0222.2	0.584	0.223	0.3824	1	1
B0222.3|B0222.3|B0222.3	193	239	1.2365	3.28e-30	3.21e-29
B0222.5|B0222.5|B0222.5	46	48.7	1.0583	0.00874	0.0177
B0222.9|B0222.9|B0222.9	498	528	1.059	0.328	0.477
B0228.1|B0228.1|B0228.1	77.4	57.1	0.7371	0.0442	0.0795
B0228.6|B0228.6|B0228.6	567	397	0.6989	5.17e-11	2.06e-10
B0228.7|B0228.7|B0228.7	1280	1050	0.8172	1.37e-17	7.76e-17
B0228.8|B0228.8|B0228.8	1.02	0.67	0.6579	1	1
B0228.9|B0228.9|B0228.9	4.23	2.23	0.5282	0.508	0.659
B0228.t1|B0228.t1	0.318	3.63	11.4345	0.187	0.293
B0238.10|B0238.10|B0238.10	2250	2290	1.0175	0.0173	0.0336
B0238.11|B0238.11|B0238.11	3720	2900	0.7801	5.5e-151	4.65e-149
B0238.12|B0238.12|B0238.12	29.8	50.9	1.7075	5.81e-27	5.1e-26
B0238.13|B0238.13|B0238.13	157	190	1.2105	8.29e-21	5.51e-20
B0238.15|B0238.15|B0238.15	24.6	19.8	0.8066	0.76	0.889
B0238.18|B0238.18	11.2	17.1	1.5205	0.00636	0.0131
B0238.1|B0238.1|B0238.1	364	464	1.273	1.87e-65	4.67e-64
B0238.7|B0238.7|B0238.7	0.855	0	0	0.546	0.692
B0238.9|B0238.9|B0238.9	944	1370	1.4484	7.76e-08	2.53e-07
B0240.5|B0240.5	0	0	NaN	NA	NA
B0240.6|B0240.6	0.266	0	0	1	1
B0244.10|B0244.10|B0244.10	60.2	48.4	0.8039	0.00452	0.00953
B0244.11|B0244.11|B0244.11	0	0.67	Inf	0.373	0.534
B0244.13|B0244.13	3.57	8.16	2.2831	0.142	0.23
B0244.14|B0244.14	55.2	174	3.1509	4.98e-08	1.64e-07
B0244.4|B0244.4|B0244.4	4.6	4.69	1.0196	0.0441	0.0795
B0244.5|B0244.5|B0244.5	11.6	12.3	1.0626	0.000245	0.000594
B0244.6|B0244.6|B0244.6	28.4	29.1	1.0242	1.96e-05	5.29e-05
B0244.7|B0244.7|B0244.7	9.94	12.8	1.2872	0.0467	0.0837
B0244.9|B0244.9|B0244.9	0.563	0	0	0.995	1
B0244.t1|B0244.t1	3.3	7.94	2.405	0.141	0.229
B0244.t2|B0244.t2	0	3.19	Inf	0.15	0.242
B0244.t3|B0244.t3	0	4.78	Inf	0.0406	0.0736
B0250.11|B0250.11	17.2	33.8	1.9578	0.692	0.824
B0250.12|B0250.12	454	347	0.7658	1.6e-07	5.11e-07
B0250.14|B0250.14	0	0	NaN	NA	NA
B0250.15|B0250.15	0.38	0.447	1.1757	0.687	0.819
B0250.16|B0250.16	0.274	0.223	0.815	0.684	0.816
B0250.17|B0250.17	0.229	0	0	1	1
B0250.2|B0250.2|B0250.2	254	194	0.7615	0.0224	0.0426
B0250.3|B0250.3	2070	3730	1.8034	0.801	0.924
B0250.4|B0250.4|B0250.4	639	482	0.7545	4.46e-05	0.000116
B0250.5|B0250.5|B0250.5	801	752	0.9397	0.000918	0.00211
B0250.7|B0250.7	56.8	122	2.1416	0.137	0.223
B0250.8|B0250.8|B0250.8	6.11	12	1.9626	0.0672	0.117
B0252.1|B0252.1|B0252.1	65.1	92.9	1.4277	4.16e-25	3.36e-24
B0252.3|B0252.3|B0252.3a	424	450	1.0602	2.23e-12	9.63e-12
B0252.3|B0252.3|B0252.3b	242	243	1.0031	9.85e-07	2.97e-06
B0252.3|B0252.3|B0252.3c	212	224	1.0568	7.66e-07	2.33e-06
B0252.5|B0252.5|B0252.5	5.04	11	2.1876	0.000703	0.00163
B0252.8|B0252.8|B0252.8	17.6	11.8	0.6741	0.00401	0.00853
B0261.1|B0261.1|B0261.1	1750	2230	1.2752	0.621	0.763
B0261.4|B0261.4|B0261.4a	584	626	1.0721	0.485	0.638
B0261.4|B0261.4|B0261.4b	521	573	1.1001	0.654	0.791
B0261.5|B0261.5|B0261.5	1.01	1.82	1.7913	0.917	1
B0261.6|B0261.6|B0261.6a	3.8	0.894	0.2354	0.172	0.273
B0261.6|B0261.6|B0261.6b	4.49	1.79	0.3984	0.508	0.659
B0261.7|B0261.7|B0261.7	680	1030	1.5201	0.0455	0.0818
B0261.8|B0261.8|B0261.8	534	554	1.0383	1.28e-07	4.11e-07
B0261.9|B0261.9|B0261.9	4.91	0.67	0.1364	0.0101	0.0203
B0272.3|B0272.3|B0272.3	2550	2770	1.0875	6.25e-30	6.07e-29
B0272.4|B0272.4|B0272.4	602	509	0.8456	0.00023	0.000561
B0273.111|B0273.111	0	0	NaN	NA	NA
B0273.112|B0273.112	1.58	1.79	1.1343	0.462	0.63
B0273.113|B0273.113	0	0	NaN	NA	NA
B0273.114|B0273.114	0	0.223	Inf	0.472	0.63
B0273.1|B0273.1|B0273.1	29.8	28	0.9399	0.00379	0.00808
B0273.3|B0273.3|B0273.3	181	191	1.0531	0.0151	0.0295
B0280.11|B0280.11|B0280.11	3.44	6.09	1.7697	0.393	0.557
B0280.13|B0280.13|B0280.13	318	391	1.2273	1.27e-62	3e-61
B0280.17|B0280.17|B0280.17	112	125	1.1145	1.61e-05	4.4e-05
B0280.19|B0280.19	0.123	0	0	1	1
B0280.20|B0280.20	0.123	0	0	1	1
B0280.2|B0280.2|B0280.2	38.2	62	1.6211	5.15e-19	3.13e-18
B0280.6|B0280.6	211	283	1.3405	4.44e-11	1.78e-10
B0280.7|B0280.7|B0280.7	142	167	1.1785	4.71e-19	2.87e-18
B0280.9|B0280.9|B0280.9	975	866	0.8886	0.00158	0.00352
B0281.1|B0281.1|B0281.1	0.303	1.34	4.4251	0.152	0.244
B0281.3|B0281.3|B0281.3	14.8	16.3	1.104	2.22e-07	7.03e-07
B0281.4|B0281.4|B0281.4	30.1	9.89	0.3287	4.61e-07	1.43e-06
B0281.5|B0281.5|B0281.5a	1280	1170	0.9091	1.19e-67	3.12e-66
B0281.5|B0281.5|B0281.5b	882	718	0.8142	6.29e-53	1.18e-51
B0281.6|B0281.6|B0281.6	55.8	12.6	0.2251	3.09e-11	1.25e-10
B0281.7|B0281.7	0.882	0.223	0.2532	0.843	0.962
B0281.8|B0281.8|B0281.8	1.38	0.223	0.1622	0.962	1
B0284.1|B0284.1|B0284.1	64.8	349	5.3763	3.53e-141	2.74e-139
B0284.2|B0284.2|B0284.2	72	109	1.5167	2.04e-28	1.89e-27
B0284.3|B0284.3|B0284.3	253	246	0.9731	0.12	0.198
B0284.4|B0284.4|B0284.4	3.9	8.27	2.1175	6.78e-09	2.38e-08
B0284.5|B0284.5	5.1	6.25	1.2271	0.0283	0.0529
B0284.6|B0284.6	25.9	218	8.4171	2.51e-30	2.47e-29
B0284.7|B0284.7	0	0	NaN	NA	NA
B0285.11|B0285.11	13.4	22.8	1.7046	0.176	0.278
B0285.12|B0285.12	27.3	213	7.8252	5.52e-27	4.85e-26
B0285.14|B0285.14	0.106	0	0	1	1
B0285.15|B0285.15	0.817	1.12	1.3666	0.46	0.63
B0285.16|B0285.16	1.02	2.93	2.8635	0.235	0.358
B0285.3|B0285.3|B0285.3	458	645	1.4081	0.274	0.41
B0285.4|B0285.4|B0285.4	889	663	0.7458	5.44e-27	4.78e-26
B0285.6|B0285.6|B0285.6	30.9	23.1	0.7493	0.454	0.624
B0285.t1|B0285.t1	0	1.59	Inf	0.488	0.638
B0286.1|B0286.1|B0286.1	454	512	1.1268	0.00289	0.00624
B0286.3|B0286.3|B0286.3	248	274	1.1074	2.13e-10	8.16e-10
B0286.8|B0286.8	0.457	0	0	1	1
B0286.9|B0286.9	0.457	0	0	1	1
B0294.1|B0294.1|B0294.1	12.7	13.5	1.0688	1	1
B0294.3|B0294.3|B0294.3	1.91	2.49	1.3053	0.942	1
B0302.2|B0302.2|B0302.2	20.8	13.8	0.6635	0.047	0.0842
B0302.4|B0302.4|B0302.4	8.59	4.94	0.5755	0.0652	0.114
B0302.5|B0302.5|B0302.5	189	169	0.897	4.79e-06	1.37e-05
B0302.7|B0302.7	2.22	0	0	0.296	0.438
B0303.11|B0303.11|B0303.11	218	265	1.2164	2.85e-50	4.99e-49
B0303.14|B0303.14|B0303.14	661	600	0.9079	4.26e-23	3.14e-22
B0303.15|B0303.15|B0303.15	583	646	1.1079	0.182	0.286
B0303.16|B0303.16|B0303.16	5.41	6.31	1.167	0.137	0.223
B0303.17|B0303.17	0	0.223	Inf	0.472	0.63
B0303.2|B0303.2|B0303.2	529	436	0.8239	0.0851	0.145
B0303.3|B0303.3|B0303.3	7560	9380	1.2407	1.19e-45	1.9e-44
B0303.4|B0303.4|B0303.4	2570	3410	1.3255	0.0007	0.00162
B0303.7|B0303.7|B0303.7a	809	834	1.0316	0.632	0.773
B0303.7|B0303.7|B0303.7b	793	725	0.914	0.386	0.549
B0304.10|B0304.10	0.115	0.447	3.889	0.487	0.638
B0304.2|B0304.2|B0304.2	334	439	1.3162	0.0155	0.0302
B0304.4|B0304.4|B0304.4	217	177	0.8156	5.44e-09	1.92e-08
B0310.10|B0310.10	0.621	36.9	59.4087	1.49e-09	5.46e-09
B0310.11|B0310.11	1.99	8.86	4.4468	0.606	0.747
B0310.12|B0310.12	0.621	36.9	59.4087	1.49e-09	5.46e-09
B0310.1|B0310.1|B0310.1a	201	213	1.0608	3.16e-10	1.2e-09
B0310.1|B0310.1|B0310.1b	247	261	1.0597	3.33e-14	1.6e-13
B0310.2|B0310.2|B0310.2	1510	1730	1.1493	2.57e-12	1.11e-11
B0310.3|B0310.3|B0310.3	14.9	15.8	1.0586	0.486	0.638
B0310.6|B0310.6|B0310.6	39.4	27.5	0.6972	0.027	0.0507
B0310.7|B0310.7	1	0	0	1	1
B0310.8|B0310.8	0.229	0	0	1	1
B0310.9|B0310.9	1	0	0	1	1
B0331.2|B0331.2|B0331.2	16.1	21.5	1.3338	3.52e-08	1.17e-07
B0334.10|B0334.10|B0334.10	9.05	5.17	0.571	0.792	0.916
B0334.12|B0334.12	0.636	6.37	10.0286	0.559	0.703
B0334.13|B0334.13|B0334.13	133	73.3	0.5512	0.7	0.832
B0334.15|B0334.15|B0334.15	4150	3630	0.8741	1.88e-97	8.31e-96
B0334.16|B0334.16	0	0	NaN	NA	NA
B0334.17|B0334.17	0.503	0.447	0.8888	0.822	0.944
B0334.18|B0334.18	0	11.2	Inf	0.000224	0.000546
B0334.19|B0334.19	0.564	6.37	11.2962	0.421	0.589
B0334.3|B0334.3|B0334.3a	3380	3890	1.1506	3.38e-06	9.79e-06
B0334.3|B0334.3|B0334.3b	1720	1970	1.1434	0.000704	0.00163
B0334.4|B0334.4|B0334.4	973	1050	1.077	7.31e-15	3.64e-14
B0334.5|B0334.5|B0334.5	3990	3350	0.8395	1.87e-96	8.16e-95
B0334.6|B0334.6|B0334.6	239	163	0.6802	0.142	0.231
B0334.9|B0334.9	2.98	1.79	0.5998	1	1
B0336.11|B0336.11|B0336.11a	395	322	0.8146	3.61e-05	9.51e-05
B0336.11|B0336.11|B0336.11b	69.6	70.2	1.008	0.004	0.0085
B0336.12|B0336.12|B0336.12	0.989	0.67	0.6779	1	1
B0336.13|B0336.13|B0336.13	657	802	1.222	0.000819	0.00189
B0336.14|B0336.14	1.71	0.447	0.2615	0.917	1
B0336.15|B0336.15	1.71	0.447	0.2615	0.917	1
B0336.16|B0336.16	3.47	0	0	0.0123	0.0243
B0336.3|B0336.3|B0336.3	3420	4090	1.1952	5.03e-26	4.23e-25
B0336.5|B0336.5|B0336.5a	530	663	1.251	0.00332	0.00713
B0336.5|B0336.5|B0336.5b	540	658	1.2184	0.000111	0.000279
B0336.7|B0336.7|B0336.7a	523	698	1.3347	0.00173	0.00384
B0336.7|B0336.7|B0336.7b	1040	1390	1.3338	9.26e-06	2.58e-05
B0344.1|B0344.1	245	315	1.2827	1.41e-07	4.51e-07
B0344.3|B0344.3	1.55	91.9	59.5082	4.48e-23	3.3e-22
B0344.4|B0344.4	1.55	91.9	59.5082	4.48e-23	3.3e-22
B0344.5|B0344.5	1.66	91.9	55.3899	1.78e-22	1.27e-21
B0344.t1|B0344.t1	1.44	90.1	62.6258	1e-22	7.25e-22
B0344.t2|B0344.t2	1.44	90.1	62.6258	1e-22	7.25e-22
B0344.t3|B0344.t3	1.44	90.1	62.6258	1e-22	7.25e-22
B0348.1|B0348.1|B0348.1	1.57	0.447	0.2846	0.441	0.609
B0348.2|B0348.2|B0348.2	15.8	13.8	0.8775	0.022	0.0419
B0348.5|B0348.5|B0348.5	84.6	110	1.2993	1.12e-24	8.91e-24
B0350.3|B0350.3|B0350.3	0.266	0	0	1	1
B0350.67|B0350.67	0	0.223	Inf	0.472	0.63
B0350.68|B0350.68	0.245	0	0	1	1
B0350.69|B0350.69	0	0.223	Inf	0.472	0.63
B0350.70|B0350.70	0	0	NaN	NA	NA
B0350.71|B0350.71	0.229	0.223	0.9773	0.65	0.787
B0350.72|B0350.72	0	0	NaN	NA	NA
B0350.73|B0350.73	1.34	4.97	3.7005	0.0739	0.128
B0350.74|B0350.74	3	1.56	0.5211	0.484	0.638
B0350.75|B0350.75	0	0.447	Inf	0.436	0.602
B0350.76|B0350.76	1.73	0.67	0.3882	0.469	0.63
B0350.77|B0350.77	0.229	0.223	0.9773	0.65	0.787
B0350.78|B0350.78	0.115	0.67	5.8336	0.422	0.59
B0350.79|B0350.79	0.327	0.223	0.6837	1	1
B0350.80|B0350.80	0.229	0	0	1	1
B0350.81|B0350.81	0	0.223	Inf	0.472	0.63
B0350.82|B0350.82	0.245	0	0	1	1
B0350.83|B0350.83	2.15	0.894	0.4165	0.421	0.589
B0350.84|B0350.84	0	0.223	Inf	0.472	0.63
B0350.t1|B0350.t1	0.681	4.53	6.6471	0.0354	0.0649
B0353.1|B0353.1|B0353.1a	407	370	0.9089	0.0678	0.118
B0353.1|B0353.1|B0353.1b	400	362	0.9052	0.0339	0.0625
B0353.2|B0353.2	0	0	NaN	NA	NA
B0361.11|B0361.11|B0361.11	5.07	4.69	0.9257	0.0269	0.0506
B0361.2|B0361.2|B0361.2a	923	881	0.9544	0.000476	0.00112
B0361.2|B0361.2|B0361.2b	219	126	0.5773	0.000193	0.000473
B0361.3|B0361.3|B0361.3	1960	1830	0.9315	0.191	0.298
B0361.4|B0361.4|B0361.4	45.6	41.4	0.9077	3.29e-05	8.7e-05
B0361.6|B0361.6|B0361.6	751	583	0.7771	5.69e-05	0.000147
B0361.8|B0361.8|B0361.8	1840	1790	0.9725	9.67e-07	2.92e-06
B0361.9|B0361.9|B0361.9	390	302	0.7738	0.0107	0.0214
B0365.1|B0365.1|B0365.1	621	918	1.4789	1.53e-87	5.89e-86
B0365.2|B0365.2	0.94	1.82	1.9323	1	1
B0365.7|B0365.7|B0365.7	78.2	108	1.3775	5.47e-33	5.88e-32
B0365.8|B0365.8	0	0	NaN	NA	NA
B0379.10|B0379.10	0	0	NaN	NA	NA
B0379.11|B0379.11	127	342	2.7041	1.91e-12	8.31e-12
B0379.1|B0379.1	122	71.8	0.5902	0.975	1
B0379.1|B0379.1|B0379.1a	162	95.7	0.5914	1	1
B0379.2|B0379.2|B0379.2	1.19	0.67	0.5655	0.414	0.581
B0379.6|B0379.6|B0379.6	0	0	NaN	NA	NA
B0379.7|B0379.7|B0379.7	2.41	8.61	3.5679	0.111	0.185
B0379.8|B0379.8	0.151	0	0	1	1
B0379.9|B0379.9	0	1.59	Inf	0.488	0.638
B0391.10|B0391.10|B0391.10	85.1	93	1.0932	0.598	0.739
B0391.13|B0391.13	0	0	NaN	NA	NA
B0391.1|B0391.1	0	0	NaN	NA	NA
B0391.3|B0391.3|B0391.3	0.123	0	0	1	1
B0391.8|B0391.8	209	135	0.6454	6.05e-05	0.000156
B0393.10|B0393.10	2.14	0.223	0.1046	0.962	1
B0393.11|B0393.11	0	0	NaN	NA	NA
B0393.12|B0393.12	0.351	0.223	0.636	1	1
B0393.13|B0393.13	0.106	0	0	1	1
B0393.14|B0393.14	1.07	2.46	2.3005	0.0161	0.0314
B0393.15|B0393.15	0.115	0	0	1	1
B0393.16|B0393.16	0	0	NaN	NA	NA
B0393.3|B0393.3|B0393.3	2360	2930	1.2436	1.15e-40	1.59e-39
B0393.4|B0393.4|B0393.4	4.09	14.1	3.4342	0.0855	0.146
B0393.5|B0393.5|B0393.5	1580	1710	1.0814	5.07e-43	7.52e-42
B0393.6|B0393.6|B0393.6	521	617	1.1846	8.25e-27	7.19e-26
B0393.7|B0393.7|B0393.7	8.62	6.48	0.7512	0.46	0.63
B0393.8|B0393.8|B0393.8	316	407	1.2874	0.515	0.668
B0393.9|B0393.9|B0393.9a	88.6	70.9	0.8004	0.000125	0.000313
B0393.9|B0393.9|B0393.9b	97.8	79.9	0.817	2.11e-05	5.68e-05
B0395.10|B0395.10	0.478	1.59	3.3324	1	1
B0395.3|B0395.3|B0395.3	3080	3010	0.9775	3.08e-37	3.84e-36
B0395.7|B0395.7	0.67	3.63	5.422	0.559	0.703
B0395.8|B0395.8	0	0	NaN	NA	NA
B0395.9|B0395.9	0	0	NaN	NA	NA
B0395.t1|B0395.t1	0.478	1.59	3.3324	1	1
B0399.3|B0399.3	0	0	NaN	NA	NA
B0399.t10|B0399.t10	0.106	0	0	1	1
B0399.t11|B0399.t11	0	0	NaN	NA	NA
B0399.t12|B0399.t12	0.115	0	0	1	1
B0399.t13|B0399.t13	0	0	NaN	NA	NA
B0399.t14|B0399.t14	0	0	NaN	NA	NA
B0399.t15|B0399.t15	0	0	NaN	NA	NA
B0399.t16|B0399.t16	0	0	NaN	NA	NA
B0399.t1|B0399.t1	0	0	NaN	NA	NA
B0399.t2|B0399.t2	0	0	NaN	NA	NA
B0399.t3|B0399.t3	0	0	NaN	NA	NA
B0399.t4|B0399.t4	0	0	NaN	NA	NA
B0399.t5|B0399.t5	0	0	NaN	NA	NA
B0399.t6|B0399.t6	0	0.223	Inf	0.472	0.63
B0399.t7|B0399.t7	0	0	NaN	NA	NA
B0399.t8|B0399.t8	0.106	0.223	2.1088	0.533	0.683
B0399.t9|B0399.t9	0	1.59	Inf	0.488	0.638
B0403.10|B0403.10	0	0	NaN	NA	NA
B0403.11|B0403.11	0.503	0.67	1.3332	0.649	0.787
B0403.12|B0403.12	0.115	0.223	1.9445	0.536	0.685
B0403.13|B0403.13	0.115	0.223	1.9445	0.536	0.685
B0403.14|B0403.14	0	0	NaN	NA	NA
B0403.3|B0403.3|B0403.3	15.1	40.1	2.6561	4.29e-13	1.93e-12
B0403.5|B0403.5|B0403.5	484	397	0.8204	1.2e-16	6.51e-16
B0403.6|B0403.6|B0403.6	31	24.6	0.7943	0.0142	0.0278
B0403.7|B0403.7	0	0	NaN	NA	NA
B0403.8|B0403.8	0	0.223	Inf	0.472	0.63
B0403.9|B0403.9	1.84	2.01	1.0955	0.441	0.609
B0410.1|B0410.1|B0410.1	2.19	5.17	2.362	0.000763	0.00176
B0410.3|B0410.3|B0410.3	254	199	0.7818	0.00159	0.00355
B0410.4|B0410.4	0.229	1.12	4.8865	0.287	0.427
B0412.3|B0412.3|B0412.3	3530	4410	1.2498	0.931	1
B0412.6|B0412.6	1.1	1.56	1.4255	0.235	0.358
B0412.7|B0412.7	2.37	2.9	1.2244	0.0151	0.0295
B0414.10|B0414.10	0.123	0	0	1	1
B0414.11|B0414.11	0	0.223	Inf	0.472	0.63
B0414.12|B0414.12	0	0	NaN	NA	NA
B0416.1|B0416.1|B0416.1	872	1010	1.1601	4e-37	4.97e-36
B0416.2|B0416.2|B0416.2	0.372	0.223	0.6001	1	1
B0416.3|B0416.3|B0416.3	17.5	30.1	1.7158	1.08e-10	4.22e-10
B0416.4|B0416.4|B0416.4	321	209	0.6518	3.51e-25	2.84e-24
B0416.5|B0416.5|B0416.5a	3460	4420	1.2774	5.95e-46	9.51e-45
B0416.5|B0416.5|B0416.5b	2390	3350	1.3981	1.75e-22	1.26e-21
B0416.7|B0416.7|B0416.7a	6.04	11.4	1.8858	6.25e-08	2.05e-07
B0416.7|B0416.7|B0416.7b	7.1	11.6	1.6352	7.84e-08	2.55e-07
B0416.8|B0416.8	0.784	0.223	0.285	0.89	1
B0416.9|B0416.9	0.801	4.3	5.3759	0.118	0.196
B0432.10|B0432.10|B0432.10	1040	1010	0.9638	1.63e-16	8.79e-16
B0432.11|B0432.11|B0432.11	0.343	0	0	1	1
B0432.13|B0432.13|B0432.13	1620	1940	1.1969	1.12e-05	3.1e-05
B0432.14|B0432.14|B0432.14	25.6	29.2	1.1397	0.000385	0.000915
B0432.16|B0432.16	0.123	0.447	3.6429	0.487	0.638
B0432.17|B0432.17	0.115	0	0	1	1
B0432.18|B0432.18	0.123	0.447	3.6429	0.487	0.638
B0432.19|B0432.19	0.503	1.59	3.1701	1	1
B0432.1|B0432.1|B0432.1	24.4	14.9	0.6102	0.00337	0.00723
B0432.6|B0432.6|B0432.6	453	531	1.1715	0.745	0.876
B0432.7|B0432.7|B0432.7	616	838	1.359	6.53e-12	2.75e-11
B0432.8|B0432.8|B0432.8	199	226	1.1345	0.384	0.547
B0432.9|B0432.9|B0432.9	516	537	1.0399	7.13e-05	0.000183
B0454.12|B0454.12	0	0	NaN	NA	NA
B0454.13|B0454.13	0.123	1.82	14.8145	0.412	0.58
B0454.14|B0454.14	0	0	NaN	NA	NA
B0454.15|B0454.15	0	0	NaN	NA	NA
B0454.16|B0454.16	0	0	NaN	NA	NA
B0454.17|B0454.17	0	0	NaN	NA	NA
B0454.18|B0454.18	0.564	0.67	1.1877	0.755	0.885
B0454.19|B0454.19	0	0	NaN	NA	NA
B0454.20|B0454.20	0	0	NaN	NA	NA
B0454.21|B0454.21	0	0	NaN	NA	NA
B0454.22|B0454.22	0	0	NaN	NA	NA
B0454.23|B0454.23	0	0	NaN	NA	NA
B0454.24|B0454.24	0	0	NaN	NA	NA
B0454.25|B0454.25	0	0	NaN	NA	NA
B0454.5|B0454.5|B0454.5	17.7	11.4	0.645	0.905	1
B0454.6|B0454.6|B0454.6	229	393	1.715	4.89e-73	1.44e-71
B0454.8|B0454.8|B0454.8	132	128	0.9709	6.09e-08	2e-07
B0454.9|B0454.9|B0454.9	691	722	1.0457	3.1e-07	9.71e-07
B0457.10|B0457.10	0.115	0	0	1	1
B0457.11|B0457.11	0	0	NaN	NA	NA
B0457.12|B0457.12	0.106	0	0	1	1
B0457.13|B0457.13	0	0	NaN	NA	NA
B0457.14|B0457.14	0.106	0	0	1	1
B0457.15|B0457.15	0.115	0	0	1	1
B0457.16|B0457.16	12.1	11.3	0.9328	0.925	1
B0457.17|B0457.17	0	0	NaN	NA	NA
B0457.18|B0457.18	0.343	0.223	0.6504	1	1
B0457.19|B0457.19	10.6	14.8	1.3908	0.00571	0.0119
B0457.2|B0457.2|B0457.2	150	114	0.7557	0.138	0.225
B0457.3|B0457.3	0.343	2.46	7.1545	0.000245	0.000594
B0457.4|B0457.4|B0457.4	0.736	4.02	5.4665	3.13e-06	9.08e-06
B0457.6|B0457.6|B0457.6	192	165	0.86	0.00161	0.00358
B0457.8|B0457.8	0	0	NaN	NA	NA
B0457.9|B0457.9	0.115	0	0	1	1
B0462.1|B0462.1|B0462.1	40.3	54.4	1.351	4.84e-18	2.8e-17
B0462.4|B0462.4|B0462.4	83.7	54.8	0.6547	0.382	0.544
B0462.5|B0462.5|B0462.5	4.73	14.7	3.0988	0.000514	0.00121
B0464.2|B0464.2|B0464.2a	3350	3450	1.0287	1.22e-69	3.37e-68
B0464.2|B0464.2|B0464.2b	362	337	0.9308	0.106	0.178
B0464.2|B0464.2|B0464.2c	3500	3580	1.0212	4.91e-70	1.36e-68
B0464.2|B0464.2|B0464.2d	322	286	0.8874	0.0804	0.138
B0464.6|B0464.6|B0464.6	5580	7340	1.3139	1.36e-29	1.31e-28
B0464.9|B0464.9|B0464.9	612	890	1.4554	0.065	0.113
B0478.23|B0478.23	0.106	0.223	2.1088	0.533	0.683
B0478.24|B0478.24	0	0	NaN	NA	NA
B0478.25|B0478.25	0	0	NaN	NA	NA
B0478.26|B0478.26	0.106	0.223	2.1088	0.533	0.683
B0478.3|B0478.3|B0478.3	43.8	30.2	0.6886	0.00243	0.00529
B0491.10|B0491.10	0.115	0.223	1.9445	0.536	0.685
B0491.11|B0491.11	0.106	5	47.2375	0.0432	0.0781
B0491.1|B0491.1|B0491.1	626	558	0.8922	0.997	1
B0491.5|B0491.5|B0491.5	6740	7110	1.0557	1.04e-77	3.35e-76
B0491.6|B0491.6|B0491.6a	956	963	1.0069	0.289	0.429
B0491.6|B0491.6|B0491.6b	932	934	1.0016	0.46	0.63
B0491.7|B0491.7|B0491.7	788	1090	1.3846	0.00664	0.0137
B0491.9|B0491.9	0.44	0.223	0.5072	1	1
B0491.t1|B0491.t1	0.106	3.41	32.1946	0.129	0.212
B0491.t2|B0491.t2	0.106	3.41	32.1946	0.129	0.212
B0495.11|B0495.11	0.115	0	0	1	1
B0495.12|B0495.12	0	0	NaN	NA	NA
B0495.13|B0495.13	0.106	0.67	6.3264	0.425	0.593
B0495.14|B0495.14	0	0	NaN	NA	NA
B0495.15|B0495.15	2.41	2.46	1.0212	0.472	0.63
B0495.16|B0495.16	0.229	0	0	1	1
B0495.17|B0495.17	0	0.223	Inf	0.472	0.63
B0495.18|B0495.18	0.123	0	0	1	1
B0495.19|B0495.19	1.68	1.34	0.7996	0.312	0.456
B0495.20|B0495.20	0.274	0.223	0.815	0.684	0.816
B0495.21|B0495.21	0.106	0.447	4.2176	0.487	0.638
B0495.22|B0495.22	0.106	0.223	2.1088	0.533	0.683
B0495.2|B0495.2|B0495.2	1640	2020	1.2307	0.293	0.435
B0495.5|B0495.5|B0495.5	1390	1510	1.0858	6.57e-14	3.09e-13
B0495.6|B0495.6|B0495.6	238	309	1.2988	0.0773	0.133
B0495.7|B0495.7|B0495.7	8810	9810	1.1146	5.17e-46	8.27e-45
B0495.8|B0495.8|B0495.8a	2240	1900	0.8483	1.89e-55	3.76e-54
B0495.8|B0495.8|B0495.8b	1190	1100	0.9314	2.68e-22	1.91e-21
B0495.9|B0495.9|B0495.9	608	453	0.7448	3.21e-08	1.07e-07
B0496.11|B0496.11|B0496.11	0.515	2.49	4.8315	0.138	0.224
B0496.12|B0496.12	0	0	NaN	NA	NA
B0496.13|B0496.13	0.619	0.894	1.4442	0.554	0.7
B0496.14|B0496.14	0.601	1.12	1.859	0.373	0.534
B0496.15|B0496.15	0	0	NaN	NA	NA
B0496.16|B0496.16	0.53	0.447	0.8435	0.924	1
B0496.17|B0496.17	1.37	0.67	0.4894	0.757	0.887
B0496.18|B0496.18	0.817	1.82	2.223	1	1
B0496.19|B0496.19	0.106	0	0	1	1
B0496.1|B0496.1|B0496.1	7.11	1.34	0.1885	0.00063	0.00147
B0496.2|B0496.2|B0496.2	83.1	71.4	0.8588	0.105	0.176
B0496.6|B0496.6|B0496.6	4.04	2.9	0.7195	0.773	0.901
B0507.10|B0507.10|B0507.10	24.6	87.4	3.5548	6.24e-75	1.91e-73
B0507.13|B0507.13	0	0	NaN	NA	NA
B0507.14|B0507.14	1.09	1.12	1.0283	0.78	0.906
B0507.1|B0507.1|B0507.1	787	957	1.2151	6.86e-19	4.14e-18
B0507.2|B0507.2|B0507.2	573	751	1.3109	1.71e-32	1.81e-31
B0507.3|B0507.3|B0507.3a	287	189	0.6597	0.0243	0.046
B0507.3|B0507.3|B0507.3b	274	176	0.6434	0.0144	0.0282
B0507.4|B0507.4|B0507.4	0.504	0.894	1.7734	0.484	0.638
B0507.5|B0507.5|B0507.5	0.257	0.894	3.4717	0.375	0.536
B0507.6|B0507.6|B0507.6	11.7	22.4	1.9067	2.86e-13	1.3e-12
B0507.7|B0507.7|B0507.7	10.2	15.2	1.4853	9.89e-07	2.98e-06
B0507.8|B0507.8|B0507.8	16.4	54.7	3.3427	3.1e-42	4.49e-41
B0507.9|B0507.9|B0507.9	3.27	5.61	1.7156	0.0334	0.0616
B0511.11|B0511.11|B0511.11	83.6	283	3.3824	1.65e-57	3.48e-56
B0511.12|B0511.12|B0511.12	2870	2310	0.805	2.92e-82	1.01e-80
B0511.13|B0511.13|B0511.13	799	750	0.9393	1.95e-15	9.97e-15
B0511.14|B0511.14|B0511.14a	715	1190	1.6713	0.318	0.465
B0511.14|B0511.14|B0511.14b	560	984	1.7574	0.14	0.228
B0511.15|B0511.15	0.327	1.82	5.5607	0.783	0.908
B0511.16|B0511.16	2.95	9.41	3.1955	3.94e-07	1.23e-06
B0511.2|B0511.2|B0511.2	115	168	1.4611	0.021	0.0402
B0511.6|B0511.6|B0511.6	5970	6140	1.0297	1.64e-33	1.79e-32
B0511.7|B0511.7|B0511.7	924	945	1.0227	7.28e-15	3.62e-14
B0513.11|B0513.11	1.03	0.223	0.2161	1	1
B0513.12|B0513.12	115	89.5	0.7814	0.00162	0.0036
B0513.2|B0513.2|B0513.2a	1510	1340	0.8882	1.14e-34	1.3e-33
B0513.2|B0513.2|B0513.2b	1350	1210	0.8927	3.46e-33	3.75e-32
B0513.4|B0513.4|B0513.4a	13.3	10.1	0.7625	0.751	0.882
B0513.4|B0513.4|B0513.4b	3.08	5.42	1.7608	0.18	0.284
B0513.5|B0513.5|B0513.5	386	357	0.9241	5.31e-11	2.12e-10
B0513.6|B0513.6|B0513.6	28.9	19.2	0.6642	0.0778	0.134
B0513.7|B0513.7	274	482	1.7568	0.00105	0.00239
B0513.9|B0513.9|B0513.9a	33.1	22.8	0.6904	0.284	0.423
B0513.9|B0513.9|B0513.9b	73.6	49	0.6667	0.197	0.307
B0513.t1|B0513.t1	0.106	0	0	1	1
B0523.6|B0523.6	0	0.223	Inf	0.472	0.63
B0524.2|B0524.2|B0524.2	1.26	0.223	0.177	1	1
B0524.3|B0524.3|B0524.3	5.24	12.7	2.4276	0.598	0.739
B0524.4|B0524.4|B0524.4	1.77	0.894	0.5059	0.754	0.885
B0524.5|B0524.5|B0524.5	0.626	2.26	3.6132	0.421	0.589
B0524.6|B0524.6|B0524.6	376	288	0.7658	0.0221	0.0422
B0524.7|B0524.7	0.23	3.41	14.8434	0.258	0.388
B0524.8|B0524.8	0.23	3.41	14.8434	0.258	0.388
B0524.9|B0524.9	0	0	NaN	NA	NA
B0545.4|B0545.4|B0545.4	19.6	18.2	0.9278	0.00511	0.0107
B0546.2|B0546.2|B0546.2	2500	2560	1.0215	1.03e-37	1.3e-36
B0546.3|B0546.3|B0546.3	450	682	1.5172	6.85e-18	3.94e-17
B0546.4|B0546.4|B0546.4a	542	524	0.9667	0.293	0.435
B0546.4|B0546.4|B0546.4b	520	505	0.9707	0.346	0.501
B0546.5|B0546.5|B0546.5	10.1	6.98	0.6932	0.372	0.533
B0547.2|B0547.2|B0547.2	0	0	NaN	NA	NA
B0547.34|B0547.34	0	0	NaN	NA	NA
B0554.1|B0554.1|B0554.1	1.78	3.6	2.0229	0.0209	0.04
B0554.2|B0554.2|B0554.2	1.74	0.894	0.5133	0.861	0.978
B0554.3|B0554.3|B0554.3	0	0.223	Inf	0.472	0.63
B0554.4|B0554.4|B0554.4	1.95	6.31	3.2359	0.0151	0.0295
B0554.5|B0554.5|B0554.5	2.84	6.51	2.2949	0.00174	0.00386
B0554.7|B0554.7|B0554.7	26.1	12.6	0.4846	0.00013	0.000324
B0563.10|B0563.10|B0563.10	1.76	0.67	0.3814	1	1
B0563.12|B0563.12	0	0	NaN	NA	NA
B0563.13|B0563.13	0	0	NaN	NA	NA
B0563.14|B0563.14	0.106	1.34	12.6527	0.176	0.279
B0563.15|B0563.15	0.245	0	0	1	1
B0563.16|B0563.16	0.106	0.223	2.1088	0.533	0.683
B0563.17|B0563.17	0.106	1.34	12.6527	0.176	0.279
B0563.1|B0563.1|B0563.1	142	95.6	0.6744	4.78e-06	1.36e-05
B0563.5|B0563.5|B0563.5	2.89	6.95	2.4103	0.000191	0.000468
B0563.6|B0563.6|B0563.6a	144	139	0.9635	3.65e-13	1.65e-12
B0563.6|B0563.6|B0563.6b	260	254	0.9756	6.89e-24	5.28e-23
B0563.6|B0563.6|B0563.6c	126	123	0.975	7e-11	2.77e-10
B0563.7|B0563.7|B0563.7	24.1	37	1.534	5.18e-13	2.32e-12
B0563.8|B0563.8|B0563.8	75.6	37.2	0.4925	4.05e-08	1.34e-07
B0563.9|B0563.9|B0563.9	2.98	2.49	0.8349	0.904	1
B0564.11|B0564.11|B0564.11	1020	1520	1.494	0.000202	0.000494
B0564.2|B0564.2|B0564.2	200	171	0.8524	0.771	0.899
B0564.3|B0564.3|B0564.3	169	314	1.8538	2.43e-87	9.3e-86
B0564.4|B0564.4|B0564.4	17.9	19.2	1.0718	2.55e-05	6.81e-05
B0564.6|B0564.6|B0564.6a	296	246	0.8329	7.83e-11	3.09e-10
B0564.6|B0564.6|B0564.6b	291	244	0.8394	4.81e-11	1.93e-10
B0564.7|B0564.7|B0564.7	1480	1370	0.9262	0.0319	0.059
B0564.9|B0564.9|B0564.9	296	246	0.8329	7.83e-11	3.09e-10
BE0003N10.1|BE0003N10.1|BE0003N10.1	409	450	1.1008	0.352	0.509
BE0003N10.3|BE0003N10.3|BE0003N10.3	832	893	1.0731	0.241	0.366
BE0003N10.4|BE0003N10.4	1.2	4.53	3.7629	0.178	0.281
BE0003N10.5|BE0003N10.5	1.2	4.53	3.7629	0.178	0.281
BE0003N10.t1|BE0003N10.t1	0	0	NaN	NA	NA
BE0003N10.t2|BE0003N10.t2	0.245	0.223	0.9107	0.662	0.797
BE0003N10.t3|BE0003N10.t3	0	0	NaN	NA	NA
BE0003N10.t4|BE0003N10.t4	0	0.223	Inf	0.472	0.63
BE0003N10.t5|BE0003N10.t5	0.123	0	0	1	1
BE0003N10.t6|BE0003N10.t6	0	0	NaN	NA	NA
BE10.1|BE10.1|BE10.1	0.838	0.447	0.5329	1	1
BE10.3|BE10.3|BE10.3	688	521	0.7565	2.88e-50	5.05e-49
BE10.4|BE10.4|BE10.4	68.8	75.6	1.0997	0.123	0.203
BE10.5|BE10.5|BE10.5	20.5	9.5	0.463	3.65e-05	9.62e-05
BE10.6|BE10.6	1.43	48.7	33.9986	1.49e-11	6.15e-11
BE10.7|BE10.7	0.212	0.223	1.0544	0.638	0.779
C01A2.10|C01A2.10	8.12	77.3	9.5267	1.2e-09	4.42e-09
C01A2.1|C01A2.1|C01A2.1	469	327	0.6984	0.571	0.713
C01A2.2|C01A2.2|C01A2.2a	422	377	0.8941	0.00881	0.0179
C01A2.2|C01A2.2|C01A2.2b	124	129	1.0396	0.132	0.217
C01A2.3|C01A2.3|C01A2.3	1300	1040	0.8042	1	1
C01A2.4|C01A2.4|C01A2.4	997	861	0.863	6.96e-10	2.6e-09
C01A2.5|C01A2.5|C01A2.5	1500	1390	0.928	3.45e-35	4e-34
C01A2.6|C01A2.6|C01A2.6	2.96	1.79	0.6044	0.831	0.952
C01A2.8|C01A2.8	0	0	NaN	NA	NA
C01A2.9|C01A2.9|C01A2.9	3.7	0.894	0.2414	0.172	0.273
C01B10.10|C01B10.10|C01B10.10	432	342	0.7915	1.55e-07	4.95e-07
C01B10.11|C01B10.11|C01B10.11	1520	1360	0.8984	0.957	1
C01B10.3|C01B10.3|C01B10.3	62.6	67.3	1.0763	2.46e-12	1.06e-11
C01B10.44|C01B10.44|C01B10.44	0.548	1.34	2.445	0.169	0.268
C01B10.45|C01B10.45	3.54	2.46	0.6934	0.699	0.831
C01B10.46|C01B10.46	4.81	4.5	0.9351	0.735	0.866
C01B10.47|C01B10.47	8.61	9.44	1.0969	0.169	0.268
C01B10.4|C01B10.4|C01B10.4	112	121	1.0852	3.69e-11	1.48e-10
C01B10.6|C01B10.6|C01B10.6a	1060	1020	0.9613	3.35e-46	5.37e-45
C01B10.6|C01B10.6|C01B10.6b	543	506	0.9315	2.43e-22	1.73e-21
C01B10.7|C01B10.7|C01B10.7	0.151	0.223	1.475	0.552	0.697
C01B10.8|C01B10.8|C01B10.8	1400	1990	1.4291	0.000195	0.000478
C01B10.9|C01B10.9|C01B10.9	817	904	1.1072	0.25	0.379
C01B12.10|C01B12.10	0.106	0.223	2.1088	0.533	0.683
C01B12.2|C01B12.2|C01B12.2	773	818	1.0585	0.000905	0.00208
C01B12.3|C01B12.3|C01B12.3	544	604	1.1116	2.09e-08	7.07e-08
C01B12.4|C01B12.4|C01B12.4	41.4	48.2	1.1647	1.66e-05	4.53e-05
C01B12.5|C01B12.5|C01B12.5	27.1	19.7	0.727	0.518	0.671
C01B12.8|C01B12.8|C01B12.8	388	393	1.0127	0.216	0.334
C01B12.9|C01B12.9	121	107	0.8801	0.748	0.879
C01B4.2|C01B4.2	0.274	0	0	1	1
C01B4.6|C01B4.6|C01B4.6	308	701	2.275	1.33e-40	1.84e-39
C01B4.7|C01B4.7|C01B4.7	118	703	5.9562	0	0
C01B4.8|C01B4.8|C01B4.8	26.3	54.1	2.0593	1.39e-11	5.75e-11
C01B4.9|C01B4.9|C01B4.9	284	872	3.073	9.76e-257	1.49e-254
C01B7.10|C01B7.10	0.389	0.447	1.1486	0.689	0.821
C01B7.11|C01B7.11	0.915	2.93	3.2047	0.171	0.271
C01B7.12|C01B7.12	0	0	NaN	NA	NA
C01B7.13|C01B7.13	0	0	NaN	NA	NA
C01B7.14|C01B7.14	0.898	2.04	2.2731	1	1
C01B7.15|C01B7.15	0	0	NaN	NA	NA
C01B7.16|C01B7.16	0	0	NaN	NA	NA
C01B7.3|C01B7.3|C01B7.3	0.952	0.447	0.4693	0.973	1
C01B7.5|C01B7.5|C01B7.5	25.1	29	1.1537	0.00107	0.00243
C01B7.7|C01B7.7|C01B7.7	2.53	3.13	1.2354	0.14	0.228
C01B7.8|C01B7.8	0.474	1.82	3.8342	0.994	1
C01B7.9|C01B7.9	0.564	0.67	1.1877	0.755	0.885
C01B9.1|C01B9.1|C01B9.1a	141	178	1.266	1.63e-36	1.97e-35
C01B9.1|C01B9.1|C01B9.1b	149	186	1.2459	8.51e-38	1.08e-36
C01B9.3|C01B9.3	1.66	5.23	3.1512	1	1
C01B9.4|C01B9.4|C01B9.4	6.78	1.59	0.235	0.000409	0.000969
C01B9.5|C01B9.5	6.03	5.36	0.8893	0.114	0.189
C01B9.6|C01B9.6	0	0	NaN	NA	NA
C01C10.2|C01C10.2|C01C10.2a	107	124	1.1622	2.58e-12	1.11e-11
C01C10.2|C01C10.2|C01C10.2b	157	172	1.0977	5.87e-15	2.93e-14
C01C10.5|C01C10.5	0	0	NaN	NA	NA
C01C4.2|C01C4.2|C01C4.2	2.26	3.35	1.4847	0.0381	0.0695
C01C4.3|C01C4.3|C01C4.3a	98.1	102	1.0376	1.23e-23	9.35e-23
C01C4.3|C01C4.3|C01C4.3b	111	120	1.0773	3.42e-24	2.65e-23
C01C4.4|C01C4.4	0	0	NaN	NA	NA
C01C4.5|C01C4.5	0.115	1.59	13.8711	0.775	0.902
C01C4.6|C01C4.6	0	0	NaN	NA	NA
C01C4.7|C01C4.7	0	0	NaN	NA	NA
C01F1.1|C01F1.1|C01F1.1	1340	1790	1.3411	0.438	0.605
C01F1.3|C01F1.3|C01F1.3a	1650	2020	1.2297	0.679	0.813
C01F1.3|C01F1.3|C01F1.3b	449	358	0.7962	0.00043	0.00102
C01F1.4|C01F1.4|C01F1.4	54.1	48.4	0.8955	0.00104	0.00238
C01F1.5|C01F1.5|C01F1.5	174	233	1.3389	8.49e-40	1.14e-38
C01F1.6|C01F1.6|C01F1.6	761	687	0.903	7.33e-06	2.06e-05
C01F1.7|C01F1.7	0.123	0	0	1	1
C01F1.8|C01F1.8	0.695	0.447	0.6431	1	1
C01F4.4|C01F4.4	0	0	NaN	NA	NA
C01F4.5|C01F4.5	0	0	NaN	NA	NA
C01F4.6|C01F4.6	0.221	0.223	1.0117	0.644	0.785
C01F4.7|C01F4.7	0.238	0	0	1	1
C01F4.8|C01F4.8	0	0	NaN	NA	NA
C01F4.9|C01F4.9	0.106	0	0	1	1
C01F6.12|C01F6.12	0	0	NaN	NA	NA
C01F6.13|C01F6.13	0	0	NaN	NA	NA
C01F6.2|C01F6.2|C01F6.2	24.2	28	1.1596	0.83	0.951
C01F6.9|C01F6.9|C01F6.9	529	748	1.4151	0.00123	0.00278
C01G10.10|C01G10.10|C01G10.10	587	616	1.049	0.115	0.191
C01G10.13|C01G10.13	8.98	11.1	1.2356	0.28	0.418
C01G10.14|C01G10.14|C01G10.14	1.77	5	2.8334	0.844	0.963
C01G10.15|C01G10.15|C01G10.15	3.43	2.9	0.847	0.493	0.644
C01G10.16|C01G10.16|C01G10.16	2.39	8.55	3.5823	1.04e-05	2.87e-05
C01G10.17|C01G10.17|C01G10.17	0.245	0.894	3.6429	0.381	0.543
C01G10.18|C01G10.18|C01G10.18	0	0	NaN	NA	NA
C01G10.19|C01G10.19	0.221	0.223	1.0117	0.644	0.785
C01G10.1|C01G10.1|C01G10.1	14.4	12.6	0.875	0.263	0.395
C01G10.4|C01G10.4|C01G10.4	0.577	0.894	1.5487	0.456	0.625
C01G10.5|C01G10.5|C01G10.5	1.57	1.79	1.137	0.237	0.36
C01G10.6|C01G10.6|C01G10.6	0.955	2.46	2.5725	0.00961	0.0194
C01G10.7|C01G10.7|C01G10.7	413	358	0.8666	0.00461	0.00971
C01G10.8|C01G10.8|C01G10.8	5210	5290	1.0158	2.86e-53	5.39e-52
C01G10.9|C01G10.9|C01G10.9	489	420	0.8585	0.435	0.602
C01G12.12|C01G12.12	131	146	1.12	0.0721	0.125
C01G12.13|C01G12.13|C01G12.13	4.43	2.93	0.662	0.256	0.386
C01G12.14|C01G12.14	1.01	0.67	0.6611	1	1
C01G12.15|C01G12.15	0.106	0	0	1	1
C01G12.1|C01G12.1|C01G12.1	728	747	1.0266	1.47e-17	8.3e-17
C01G12.3|C01G12.3|C01G12.3	326	254	0.7788	1.89e-16	1.02e-15
C01G12.5|C01G12.5|C01G12.5	40.8	50.1	1.2269	2.1e-09	7.63e-09
C01G12.7|C01G12.7|C01G12.7	41.4	54.9	1.3254	1.5e-11	6.2e-11
C01G12.9|C01G12.9|C01G12.9	2.82	0.894	0.3173	0.655	0.791
C01G5.3|C01G5.3|C01G5.3	68.6	83.1	1.2104	0.161	0.256
C01G5.4|C01G5.4|C01G5.4	13.3	0.67	0.0503	3.35e-13	1.52e-12
C01G5.5|C01G5.5|C01G5.5	358	271	0.7586	4.7e-09	1.67e-08
C01G5.6|C01G5.6|C01G5.6	1310	1340	1.0279	1.75e-13	8.05e-13
C01G5.7|C01G5.7|C01G5.7	33.3	28.9	0.8669	0.00406	0.00862
C01G5.9|C01G5.9|C01G5.9	283	230	0.8121	1.82e-06	5.38e-06
C01G6.10|C01G6.10	7.99	5.17	0.6469	1	1
C01G6.13|C01G6.13	2.21	1.56	0.7072	1	1
C01G6.2|C01G6.2|C01G6.2	91.8	50.2	0.5474	3.06e-06	8.87e-06
C01G6.3|C01G6.3|C01G6.3	12400	15900	1.2791	NaN	NaN
C01G6.4|C01G6.4|C01G6.4	1540	1400	0.9061	9.32e-31	9.32e-30
C01G6.5|C01G6.5|C01G6.5	3680	4330	1.1762	1.26e-21	8.68e-21
C01G6.9|C01G6.9|C01G6.9	634	442	0.6965	0.0612	0.107
C01G8.10|C01G8.10	0	0	NaN	NA	NA
C01G8.1|C01G8.1|C01G8.1a	290	547	1.8884	8.69e-13	3.85e-12
C01G8.1|C01G8.1|C01G8.1b	304	592	1.9473	1.66e-10	6.4e-10
C01G8.6|C01G8.6|C01G8.6	171	149	0.8706	0.52	0.673
C01H6.10|C01H6.10	0	0	NaN	NA	NA
C01H6.11|C01H6.11	3.7	8.83	2.3839	0.393	0.557
C01H6.2|C01H6.2|C01H6.2	248	334	1.346	7.45e-60	1.64e-58
C01H6.3|C01H6.3|C01H6.3	57.6	73.5	1.2764	1.68e-07	5.36e-07
C01H6.4|C01H6.4|C01H6.4	99	113	1.1453	3.07e-19	1.89e-18
C01H6.6|C01H6.6|C01H6.6	327	292	0.8924	0.102	0.171
C01H6.8|C01H6.8|C01H6.8a	361	295	0.8169	0.16	0.255
C01H6.8|C01H6.8|C01H6.8b	240	222	0.9227	0.0518	0.0921
C01H6.9|C01H6.9|C01H6.9	1530	2160	1.4125	0.0661	0.115
C02B10.2|C02B10.2|C02B10.2	451	561	1.2445	0.244	0.37
C02B10.3|C02B10.3|C02B10.3	1860	1960	1.0544	7.95e-05	0.000202
C02B10.4|C02B10.4|C02B10.4	2890	3600	1.2463	2.51e-43	3.77e-42
C02B10.5|C02B10.5|C02B10.5	3810	3880	1.0174	3.5e-105	1.72e-103
C02B10.6|C02B10.6|C02B10.6	2.64	1.79	0.678	0.926	1
C02B10.71|C02B10.71	0	0	NaN	NA	NA
C02B10.72|C02B10.72	0.238	0	0	1	1
C02B10.73|C02B10.73	0	0	NaN	NA	NA
C02B10.74|C02B10.74	0	0.223	Inf	0.472	0.63
C02B4.10|C02B4.10	0	0	NaN	NA	NA
C02B4.11|C02B4.11	0	0	NaN	NA	NA
C02B4.12|C02B4.12	0	0	NaN	NA	NA
C02B4.13|C02B4.13	0	0	NaN	NA	NA
C02B4.14|C02B4.14	0	0	NaN	NA	NA
C02B4.3|C02B4.3|C02B4.3	0	0.223	Inf	0.472	0.63
C02B4.4|C02B4.4|C02B4.4	74.1	113	1.5199	1.44e-05	3.94e-05
C02B4.5|C02B4.5	0	0	NaN	NA	NA
C02B4.6|C02B4.6	0	0	NaN	NA	NA
C02B4.7|C02B4.7	0	0	NaN	NA	NA
C02B4.8|C02B4.8	2.99	21.4	7.1534	0.0295	0.055
C02B4.9|C02B4.9	0	0	NaN	NA	NA
C02B4.t1|C02B4.t1	0	0	NaN	NA	NA
C02B4.t2|C02B4.t2	0.123	9.56	77.9584	0.00441	0.00932
C02B8.11|C02B8.11	0	0.223	Inf	0.472	0.63
C02B8.1|C02B8.1|C02B8.1	77.7	54.1	0.6958	0.0219	0.0418
C02B8.3|C02B8.3|C02B8.3	18.2	9.83	0.5395	0.814	0.937
C02B8.5|C02B8.5|C02B8.5	9.84	11.6	1.181	4.22e-05	0.000111
C02B8.6|C02B8.6|C02B8.6	742	747	1.0065	0.0997	0.168
C02B8.7|C02B8.7|C02B8.7	0.123	0	0	1	1
C02C2.4|C02C2.4|C02C2.4	52.2	28	0.5365	0.421	0.589
C02C2.5|C02C2.5|C02C2.5	128	95.1	0.7408	4.62e-05	0.000121
C02C6.10|C02C6.10	0	3.19	Inf	0.15	0.242
C02C6.11|C02C6.11	0.212	0.447	2.1088	0.565	0.708
C02C6.12|C02C6.12	0.151	0	0	1	1
C02C6.3|C02C6.3|C02C6.3a	797	745	0.9344	1.74e-07	5.55e-07
C02C6.3|C02C6.3|C02C6.3b	449	436	0.969	0.000795	0.00183
C02C6.3|C02C6.3|C02C6.3c	80.2	118	1.4755	0.000694	0.00161
C02C6.3|C02C6.3|C02C6.3d	288	367	1.2766	4.41e-11	1.77e-10
C02C6.4|C02C6.4	0	0.223	Inf	0.472	0.63
C02C6.5|C02C6.5	0.363	0.447	1.2297	0.681	0.814
C02C6.6|C02C6.6	0.106	0	0	1	1
C02C6.7|C02C6.7	0	0	NaN	NA	NA
C02C6.8|C02C6.8	0.212	0.447	2.1088	0.565	0.708
C02C6.9|C02C6.9	0.151	0	0	1	1
C02D4.10|C02D4.10	0.115	0	0	1	1
C02D4.11|C02D4.11	0.46	0	0	1	1
C02D4.12|C02D4.12	5.32	7.18	1.3493	0.108	0.18
C02D4.13|C02D4.13	0.115	0	0	1	1
C02D4.14|C02D4.14	0	0	NaN	NA	NA
C02D4.15|C02D4.15	42.8	151	3.5358	3.97e-08	1.32e-07
C02D4.16|C02D4.16	42.8	151	3.5358	3.97e-08	1.32e-07
C02D4.5|C02D4.5	1.16	3.41	2.9411	1	1
C02D4.6|C02D4.6	0	0	NaN	NA	NA
C02D4.7|C02D4.7	0	0	NaN	NA	NA
C02D4.8|C02D4.8	0.245	0	0	1	1
C02D4.9|C02D4.9	0.106	0.223	2.1088	0.533	0.683
C02D4.t1|C02D4.t1	1.44	90.1	62.6258	1e-22	7.25e-22
C02D5.2|C02D5.2|C02D5.2a	486	429	0.8819	0.013	0.0256
C02D5.2|C02D5.2|C02D5.2b	407	372	0.915	0.0215	0.041
C02D5.4|C02D5.4|C02D5.4	660	585	0.8869	4.89e-10	1.84e-09
C02D5.5|C02D5.5	0	0	NaN	NA	NA
C02E7.10|C02E7.10|C02E7.10	1.15	0.67	0.5835	0.414	0.581
C02E7.16|C02E7.16	0	0	NaN	NA	NA
C02E7.17|C02E7.17	0	0.223	Inf	0.472	0.63
C02E7.6|C02E7.6|C02E7.6	1100	1130	1.0239	8.86e-13	3.92e-12
C02E7.7|C02E7.7|C02E7.7	702	505	0.7189	0.0576	0.102
C02E7.8|C02E7.8|C02E7.8	1.52	1.12	0.7366	0.309	0.453
C02F12.10|C02F12.10|C02F12.10	25.7	13.6	0.5308	0.803	0.927
C02F12.3|C02F12.3|C02F12.3	207	229	1.108	1.14e-32	1.21e-31
C02F12.5|C02F12.5|C02F12.5	8.23	4.47	0.5426	1	1
C02F12.8|C02F12.8|C02F12.8	545	762	1.3977	0.0361	0.066
C02F12.9|C02F12.9|C02F12.9	6.91	10.1	1.46	4.88e-05	0.000127
C02F12.t1|C02F12.t1	0.115	1.59	13.8711	0.775	0.902
C02F4.10|C02F4.10	0.478	0.894	1.8686	0.493	0.644
C02F4.11|C02F4.11	0	0	NaN	NA	NA
C02F4.4|C02F4.4|C02F4.4	220	213	0.9705	6.57e-26	5.51e-25
C02F4.5|C02F4.5|C02F4.5	0.212	0.447	2.1088	0.565	0.708
C02F4.9|C02F4.9	0.106	0	0	1	1
C02F5.10|C02F5.10|C02F5.10	78.8	61	0.774	0.0132	0.0261
C02F5.12|C02F5.12|C02F5.12	780	651	0.8337	7.29e-06	2.05e-05
C02F5.13|C02F5.13|C02F5.13	511	345	0.6753	4.95e-25	3.99e-24
C02F5.14|C02F5.14|C02F5.14	72.7	82.8	1.1387	8.36e-19	5.01e-18
C02F5.2|C02F5.2|C02F5.2	12.4	17.2	1.3906	0.687	0.819
C02F5.3|C02F5.3|C02F5.3	2680	2720	1.0151	2.54e-27	2.26e-26
C02F5.5|C02F5.5|C02F5.5	13	18.9	1.4574	0.00272	0.0059
C02F5.6|C02F5.6|C02F5.6a	569	740	1.3019	0.892	1
C02F5.6|C02F5.6|C02F5.6b	667	1000	1.4997	0.157	0.252
C02F5.7|C02F5.7|C02F5.7a	2230	2410	1.0843	7.31e-105	3.57e-103
C02F5.7|C02F5.7|C02F5.7b	1460	1610	1.1048	1.97e-39	2.61e-38
C02G6.1|C02G6.1|C02G6.1	57.2	132	2.3095	2.95e-08	9.89e-08
C02G6.2|C02G6.2|C02G6.2	8.8	40.4	4.5921	1.86e-06	5.47e-06
C02G6.3|C02G6.3|C02G6.3	67.1	74.2	1.1057	8.15e-10	3.03e-09
C02G6.5|C02G6.5	0	0	NaN	NA	NA
C02H6.1|C02H6.1|C02H6.1	0.661	2.26	3.4233	0.559	0.703
C02H7.4|C02H7.4	0	1.59	Inf	0.488	0.638
C02H7.5|C02H7.5	0	0	NaN	NA	NA
C03A3.1|C03A3.1|C03A3.1a	706	570	0.8068	0.136	0.223
C03A3.1|C03A3.1|C03A3.1b	696	545	0.7832	0.26	0.391
C03A3.2|C03A3.2|C03A3.2	1350	1380	1.0188	0.000117	0.000294
C03A3.3|C03A3.3|C03A3.3	46.8	40.3	0.8598	7.75e-06	2.18e-05
C03A3.4|C03A3.4	0	0	NaN	NA	NA
C03A3.5|C03A3.5	0.229	0	0	1	1
C03A3.6|C03A3.6	0.23	0.67	2.9168	0.483	0.638
C03A3.7|C03A3.7	0.115	0	0	1	1
C03A3.8|C03A3.8	1.23	0.67	0.5468	0.584	0.725
C03A3.t1|C03A3.t1	0.221	0.67	3.035	0.485	0.638
C03A7.12|C03A7.12|C03A7.12	35.9	34.9	0.9713	0.00451	0.00951
C03A7.13|C03A7.13|C03A7.13	28	15.8	0.5632	0.272	0.407
C03A7.15|C03A7.15	0.381	0.223	0.586	1	1
C03A7.2|C03A7.2|C03A7.2	18.9	18.5	0.9825	0.135	0.22
C03B1.10|C03B1.10|C03B1.10	6.82	5.87	0.8606	0.19	0.297
C03B1.13|C03B1.13|C03B1.13	225	337	1.4989	4.61e-28	4.21e-27
C03B1.14|C03B1.14|C03B1.14	23	22.4	0.9736	0.0278	0.0519
C03B1.16|C03B1.16	0.115	1.82	15.8157	0.414	0.581
C03B1.1|C03B1.1|C03B1.1	8.59	12.7	1.4773	0.521	0.675
C03B1.2|C03B1.2|C03B1.2	8.93	17.8	1.9901	7e-07	2.14e-06
C03B1.3|C03B1.3|C03B1.3	0.922	1.82	1.9714	1	1
C03B1.4|C03B1.4|C03B1.4	9.78	8.04	0.8226	0.012	0.0238
C03B1.5|C03B1.5|C03B1.5	81.3	98	1.2055	5.28e-21	3.54e-20
C03B1.6|C03B1.6|C03B1.6a	0.212	0.447	2.1088	0.565	0.708
C03B1.6|C03B1.6|C03B1.6b	0.937	1.34	1.4312	0.312	0.456
C03B1.7|C03B1.7|C03B1.7	567	550	0.969	0.103	0.173
C03B1.9|C03B1.9|C03B1.9	0.654	0	0	0.898	1
C03B8.2|C03B8.2|C03B8.2	149	102	0.6884	6.32e-05	0.000163
C03B8.3|C03B8.3|C03B8.3	18.6	24.6	1.3263	0.123	0.203
C03B8.5|C03B8.5	0.123	0	0	1	1
C03B8.6|C03B8.6	0	0	NaN	NA	NA
C03C10.10|C03C10.10	0.229	0.223	0.9773	0.65	0.787
C03C10.11|C03C10.11	0	0	NaN	NA	NA
C03C10.12|C03C10.12	0.106	0.223	2.1088	0.533	0.683
C03C10.2|C03C10.2|C03C10.2	35.4	54.1	1.5285	3.94e-10	1.49e-09
C03C10.4|C03C10.4|C03C10.4	1030	810	0.7866	3.44e-34	3.86e-33
C03C10.5|C03C10.5|C03C10.5	176	169	0.9611	2.73e-05	7.26e-05
C03C10.7|C03C10.7|C03C10.7	153	154	1.0088	0.000955	0.00219
C03C10.9|C03C10.9|C03C10.9	88.4	67.6	0.7645	0.044	0.0792
C03C11.1|C03C11.1|C03C11.1	12.6	4.02	0.3191	0.0371	0.0678
C03C11.5|C03C11.5	0.229	0	0	1	1
C03C11.6|C03C11.6	0.397	0	0	1	1
C03C11.7|C03C11.7	0.123	0	0	1	1
C03C11.8|C03C11.8	0.229	0	0	1	1
C03D6.1|C03D6.1|C03D6.1	108	105	0.9759	0.0477	0.0855
C03E10.1|C03E10.1|C03E10.1	0.36	0	0	1	1
C03E10.3|C03E10.3|C03E10.3	21.5	23.4	1.0903	0.402	0.568
C03E10.8|C03E10.8	0.515	0.223	0.434	1	1
C03E10.9|C03E10.9	0.229	0.447	1.9546	0.568	0.711
C03F11.1|C03F11.1|C03F11.1	25.4	30.7	1.2062	6.06e-09	2.14e-08
C03F11.2|C03F11.2|C03F11.2	73.3	90.4	1.2333	1.16e-21	8e-21
C03F11.4|C03F11.4|C03F11.4	243	214	0.8812	1.36e-17	7.71e-17
C03F11.5|C03F11.5	0.106	0	0	1	1
C03F11.6|C03F11.6	0	0	NaN	NA	NA
C03F11.7|C03F11.7	0.389	0	0	1	1
C03F11.t1|C03F11.t1	0.115	1.59	13.8711	0.775	0.902
C03G6.17|C03G6.17|C03G6.17	81.7	125	1.5253	1.43e-41	2.03e-40
C03G6.5|C03G6.5|C03G6.5	17.6	25.3	1.4369	9.74e-09	3.38e-08
C03G6.6|C03G6.6|C03G6.6	6.89	9.16	1.3289	2.06e-05	5.54e-05
C03H12.1|C03H12.1|C03H12.1	1040	1040	0.9986	0.622	0.763
C03H12.2|C03H12.2	12.3	12	0.9748	0.306	0.45
C03H12.3|C03H12.3	12.4	12	0.9665	0.282	0.421
C03H5.2|C03H5.2|C03H5.2	752	605	0.805	0.00209	0.00459
C03H5.3|C03H5.3|C03H5.3	767	1050	1.3746	0.333	0.483
C03H5.4|C03H5.4|C03H5.4	18.8	7.71	0.4111	4.24e-07	1.32e-06
C03H5.5|C03H5.5|C03H5.5	188	247	1.3129	1.35e-26	1.16e-25
C03H5.6|C03H5.6|C03H5.6	163	131	0.8049	1.96e-06	5.77e-06
C03H5.7|C03H5.7|C03H5.7	129	80.6	0.6232	3.42e-08	1.14e-07
C03H5.8|C03H5.8	1.72	1.82	1.058	0.917	1
C04A11.1|C04A11.1|C04A11.1	180	133	0.7406	0.0175	0.0338
C04A11.2|C04A11.2|C04A11.2	682	748	1.0966	0.211	0.326
C04A11.5|C04A11.5|C04A11.5	14.1	59.7	4.2464	1.1e-15	5.71e-15
C04A11.6|C04A11.6	0.327	0	0	1	1
C04A11.7|C04A11.7	0	0	NaN	NA	NA
C04A11.8|C04A11.8	0.503	0.447	0.8888	0.822	0.944
C04A11.t1|C04A11.t1	0	1.59	Inf	0.488	0.638
C04A2.10|C04A2.10	0.335	0.894	2.6712	0.443	0.61
C04A2.11|C04A2.11	0.937	0	0	0.409	0.576
C04A2.12|C04A2.12	0.466	0.894	1.9171	0.497	0.648
C04A2.13|C04A2.13	0.335	0.894	2.6712	0.443	0.61
C04A2.14|C04A2.14	0	1.59	Inf	0.488	0.638
C04A2.8|C04A2.8	0.123	0.223	1.8214	0.539	0.685
C04A2.9|C04A2.9	0.212	0	0	1	1
C04A2.t1|C04A2.t1	0	0	NaN	NA	NA
C04B4.1|C04B4.1|C04B4.1	3.37	0.447	0.1326	0.0174	0.0336
C04B4.2|C04B4.2|C04B4.2	388	384	0.9899	7.34e-38	9.29e-37
C04B4.4|C04B4.4|C04B4.4	4.85	4.91	1.0132	0.0121	0.0241
C04B4.5|C04B4.5|C04B4.5	0.257	0	0	1	1
C04B4.6|C04B4.6|C04B4.6	0	0	NaN	NA	NA
C04C11.10|C04C11.10	0.687	0.223	0.3252	1	1
C04C11.11|C04C11.11	0.106	0.223	2.1088	0.533	0.683
C04C11.12|C04C11.12	0	0	NaN	NA	NA
C04C11.13|C04C11.13	0.687	0.223	0.3252	1	1
C04C11.14|C04C11.14	0.106	0	0	1	1
C04C11.15|C04C11.15	0	0	NaN	NA	NA
C04C11.16|C04C11.16	0.221	0	0	1	1
C04C11.17|C04C11.17	0	0	NaN	NA	NA
C04C11.18|C04C11.18	0	0.223	Inf	0.472	0.63
C04C11.19|C04C11.19	0	0	NaN	NA	NA
C04C11.1|C04C11.1	44.7	42.3	0.947	2.63e-05	7.02e-05
C04C11.1|C04C11.1|C04C11.1a	50.4	44.5	0.8832	5.89e-05	0.000152
C04C11.20|C04C11.20	0	0	NaN	NA	NA
C04C11.21|C04C11.21	1.56	0	0	0.296	0.438
C04C11.22|C04C11.22	0.106	0	0	1	1
C04C11.5|C04C11.5	0.106	0	0	1	1
C04C11.6|C04C11.6	2.55	1.12	0.4378	0.655	0.791
C04C11.7|C04C11.7	0	0	NaN	NA	NA
C04C11.8|C04C11.8	1.65	9.78	5.9418	0.682	0.814
C04C11.9|C04C11.9	3.22	2.01	0.6243	0.366	0.525
C04C3.10|C04C3.10	0	0	NaN	NA	NA
C04C3.11|C04C3.11	0	0	NaN	NA	NA
C04C3.12|C04C3.12	0	0	NaN	NA	NA
C04C3.13|C04C3.13	0	0	NaN	NA	NA
C04C3.3|C04C3.3|C04C3.3	1780	2480	1.3914	0.553	0.698
C04C3.4|C04C3.4|C04C3.4	10	5.14	0.5131	0.4	0.566
C04C3.6|C04C3.6|C04C3.6	4.93	2.46	0.498	0.747	0.879
C04C3.7|C04C3.7|C04C3.7	0.115	1.82	15.8157	0.414	0.581
C04C3.9|C04C3.9|C04C3.9	1.44	2.46	1.7084	0.0388	0.0706
C04D8.2|C04D8.2	0.106	0.223	2.1088	0.533	0.683
C04D8.3|C04D8.3	0.736	0.223	0.3037	1	1
C04D8.4|C04D8.4	0.229	1.59	6.9715	1	1
C04D8.5|C04D8.5	0.238	0.223	0.9405	0.657	0.792
C04E12.10|C04E12.10|C04E12.10	0.343	1.12	3.252	0.319	0.465
C04E12.2|C04E12.2|C04E12.2	2.83	2.68	0.9478	0.386	0.55
C04E12.4|C04E12.4|C04E12.4	3.99	3.35	0.8403	0.0876	0.149
C04E12.5|C04E12.5|C04E12.5	2.44	1.56	0.6412	1	1
C04E12.6|C04E12.6|C04E12.6	0.372	0.447	1.2002	0.684	0.816
C04E6.11|C04E6.11|C04E6.11	471	536	1.138	8.7e-15	4.31e-14
C04E6.12|C04E6.12	50.9	45.3	0.8895	0.0112	0.0224
C04E6.13|C04E6.13|C04E6.13	26.7	18.5	0.6952	0.0269	0.0506
C04E6.14|C04E6.14	0	0	NaN	NA	NA
C04E6.3|C04E6.3|C04E6.3	0.123	0	0	1	1
C04E6.4|C04E6.4|C04E6.4	0.106	0.223	2.1088	0.533	0.683
C04E6.5|C04E6.5|C04E6.5	0.487	0.223	0.4586	1	1
C04E6.7|C04E6.7|C04E6.7	123	100	0.8138	0.0576	0.102
C04E6.8|C04E6.8|C04E6.8	5.14	1.79	0.3478	0.305	0.449
C04E7.1|C04E7.1|C04E7.1	1.75	0.447	0.2551	0.293	0.434
C04E7.3|C04E7.3|C04E7.3	196	220	1.1233	2.45e-09	8.86e-09
C04E7.4|C04E7.4|C04E7.4	280	274	0.9764	1.01e-06	3.05e-06
C04E7.5|C04E7.5|C04E7.5	4.71	0.223	0.0474	0.00411	0.00873
C04E7.7|C04E7.7	3.22	5.9	1.834	0.058	0.102
C04E7.t1|C04E7.t1	3.22	4.08	1.2689	0.229	0.351
C04F1.1|C04F1.1|C04F1.1	2.56	7.6	2.9628	4.55e-08	1.51e-07
C04F1.4|C04F1.4	2.93	2.23	0.7625	0.496	0.647
C04F1.5|C04F1.5	1.4	0.447	0.3198	1	1
C04F12.12|C04F12.12|C04F12.12	1.51	3.86	2.5505	1	1
C04F12.15|C04F12.15	0.681	0.67	0.9839	0.874	0.991
C04F12.1|C04F12.1|C04F12.1	486	734	1.5089	4.66e-12	1.98e-11
C04F12.5|C04F12.5|C04F12.5	121	189	1.561	0.152	0.244
C04F12.6|C04F12.6|C04F12.6	4.51	5.2	1.153	1	1
C04F12.7|C04F12.7|C04F12.7	16.8	18.4	1.0954	0.0139	0.0272
C04F12.8|C04F12.8|C04F12.8	124	111	0.893	0.000961	0.0022
C04F12.t1|C04F12.t1	15.5	9.92	0.6401	0.0514	0.0915
C04F2.t1|C04F2.t1	0.238	3.63	15.2987	0.102	0.171
C04F5.2|C04F5.2|C04F5.2	0.993	2.49	2.5047	0.533	0.683
C04F5.8|C04F5.8|C04F5.8	1270	1920	1.5088	0.504	0.656
C04F5.9|C04F5.9|C04F5.9	355	406	1.1426	0.693	0.825
C04F6.2|C04F6.2|C04F6.2	27.4	29.3	1.0685	4.45e-06	1.27e-05
C04F6.7|C04F6.7|C04F6.7	2.01	2.46	1.2207	0.0388	0.0706
C04F6.8|C04F6.8	0	0	NaN	NA	NA
C04G2.10|C04G2.10|C04G2.10a	20.4	18.4	0.9035	0.111	0.184
C04G2.10|C04G2.10|C04G2.10b	13.4	14.4	1.0733	0.0714	0.124
C04G2.11|C04G2.11|C04G2.11	12.4	9.92	0.7967	0.658	0.793
C04G2.12|C04G2.12	0.123	0.223	1.8214	0.539	0.685
C04G2.2|C04G2.2|C04G2.2	11.7	17.4	1.4911	0.304	0.448
C04G2.3|C04G2.3	9.53	17.6	1.8462	0.0165	0.0321
C04G2.5|C04G2.5|C04G2.5	21.1	22.1	1.0505	7.83e-06	2.2e-05
C04G2.8|C04G2.8|C04G2.8	8.45	8.83	1.0452	0.453	0.622
C04G2.9|C04G2.9|C04G2.9	4.28	7.46	1.7436	0.247	0.374
C04G6.10|C04G6.10|C04G6.10	105	106	1.0091	1.43e-10	5.54e-10
C04G6.11|C04G6.11|C04G6.11	0.563	0	0	0.995	1
C04G6.12|C04G6.12	0	47.8	Inf	2.35e-17	1.32e-16
C04G6.13|C04G6.13|C04G6.13	1.7	0.223	0.1314	0.626	0.768
C04G6.14|C04G6.14	9.2	9.02	0.9806	0.772	0.9
C04G6.2|C04G6.2|C04G6.2	15.8	20.8	1.3159	1.41e-07	4.53e-07
C04G6.4|C04G6.4|C04G6.4	681	612	0.8993	0.26	0.391
C04G6.5|C04G6.5|C04G6.5	39.9	28.4	0.7132	0.00481	0.0101
C04G6.6|C04G6.6|C04G6.6	18.4	28.3	1.5397	0.228	0.351
C04G6.7|C04G6.7|C04G6.7	98.6	83.1	0.843	0.000455	0.00108
C04H4.1|C04H4.1|C04H4.1	1.67	1.12	0.6699	0.533	0.683
C04H4.2|C04H4.2	0	0	NaN	NA	NA
C04H4.3|C04H4.3	0	0	NaN	NA	NA
C04H4.4|C04H4.4	0	0	NaN	NA	NA
C04H4.5|C04H4.5	0.221	0	0	1	1
C04H4.6|C04H4.6	0.115	0	0	1	1
C04H5.10|C04H5.10	0	0	NaN	NA	NA
C04H5.1|C04H5.1|C04H5.1	339	251	0.7415	0.00982	0.0198
C04H5.7|C04H5.7|C04H5.7a	4.97	8.74	1.7575	0.000212	0.000517
C04H5.7|C04H5.7|C04H5.7b	16.1	29.5	1.8288	1.14e-07	3.66e-07
C04H5.9|C04H5.9	6.83	9.19	1.3444	0.018	0.0348
C05A2.2|C05A2.2	0	0.223	Inf	0.472	0.63
C05A2.3|C05A2.3	0.123	0	0	1	1
C05A9.10|C05A9.10	0.418	0.447	1.0694	0.698	0.83
C05A9.11|C05A9.11	0	0	NaN	NA	NA
C05A9.2|C05A9.2|C05A9.2	820	698	0.8517	1.44e-08	4.95e-08
C05A9.3|C05A9.3	0.352	0.67	1.9017	0.559	0.703
C05A9.4|C05A9.4	0	0.223	Inf	0.472	0.63
C05A9.5|C05A9.5	2.55	1.79	0.7013	0.129	0.211
C05A9.6|C05A9.6	2.66	1.56	0.5872	0.309	0.454
C05A9.7|C05A9.7	3.27	1.34	0.4104	0.243	0.368
C05A9.8|C05A9.8	0	0	NaN	NA	NA
C05A9.9|C05A9.9	0.675	0.67	0.9926	0.759	0.888
C05B10.14|C05B10.14	0	0.67	Inf	0.373	0.534
C05B10.15|C05B10.15	0.257	0.67	2.6038	0.478	0.637
C05B10.16|C05B10.16	0	0	NaN	NA	NA
C05B10.17|C05B10.17	8.6	4.94	0.5749	0.54	0.686
C05B10.18|C05B10.18	0.245	0.447	1.8214	0.571	0.713
C05B10.19|C05B10.19	0.257	0.67	2.6038	0.478	0.637
C05B10.20|C05B10.20	0.343	0.223	0.6504	1	1
C05B10.21|C05B10.21	0	0.223	Inf	0.472	0.63
C05B5.10|C05B5.10	1.45	4.3	2.9644	0.393	0.557
C05B5.11|C05B5.11|C05B5.11	4.47	4.08	0.9121	0.329	0.479
C05B5.12|C05B5.12|C05B5.12	0.684	0.447	0.6531	1	1
C05B5.13|C05B5.13	1.38	1.56	1.1355	0.0462	0.0829
C05B5.14|C05B5.14	1.29	1.34	1.0368	0.508	0.659
C05B5.15|C05B5.15	0.426	0.223	0.525	1	1
C05B5.1|C05B5.1|C05B5.1	2.89	2.49	0.8619	0.904	1
C05B5.2|C05B5.2|C05B5.2	2.68	5.2	1.9372	0.404	0.57
C05B5.4|C05B5.4|C05B5.4	277	177	0.6376	2.66e-06	7.74e-06
C05B5.5|C05B5.5|C05B5.5	14.9	19.5	1.3086	0.00013	0.000323
C05B5.8|C05B5.8|C05B5.8	356	279	0.7829	0.906	1
C05B5.9|C05B5.9	5.67	9.47	1.6706	0.0441	0.0794
C05C10.2|C05C10.2|C05C10.2a	3230	3990	1.2367	1.48e-19	9.22e-19
C05C10.2|C05C10.2|C05C10.2b	6500	8010	1.2311	1.03e-41	1.47e-40
C05C10.3|C05C10.3|C05C10.3	2040	3180	1.5559	5.91e-61	1.33e-59
C05C10.5|C05C10.5|C05C10.5a	1380	2570	1.8526	4.55e-15	2.29e-14
C05C10.5|C05C10.5|C05C10.5b	894	1950	2.1795	0.00123	0.00278
C05C10.5|C05C10.5|C05C10.5c	2590	5170	1.9951	NaN	NaN
C05C10.7|C05C10.7|C05C10.7	73.9	101	1.3613	0.195	0.304
C05C10.8|C05C10.8|C05C10.8	1.63	0.447	0.2737	0.441	0.609
C05C12.10|C05C12.10	0	0	NaN	NA	NA
C05C12.1|C05C12.1|C05C12.1	6.44	27.1	4.2114	7.64e-08	2.49e-07
C05C12.4|C05C12.4|C05C12.4	270	233	0.8651	1.18e-10	4.61e-10
C05C12.5|C05C12.5|C05C12.5	2.19	2.23	1.0178	0.0739	0.128
C05C12.6|C05C12.6|C05C12.6	24.5	20.6	0.8406	0.00869	0.0176
C05C8.10|C05C8.10	41.1	31.8	0.7741	0.0859	0.146
C05C8.1|C05C8.1|C05C8.1a	635	546	0.8603	2.2e-09	7.96e-09
C05C8.1|C05C8.1|C05C8.1b	280	251	0.8979	0.000342	0.000818
C05C8.2|C05C8.2|C05C8.2	1950	1960	1.0042	0.00119	0.00269
C05C8.5|C05C8.5|C05C8.5	1720	1970	1.1408	0.533	0.684
C05C8.6|C05C8.6|C05C8.6	970	805	0.8297	7.2e-05	0.000184
C05C8.7|C05C8.7|C05C8.7	5810	7100	1.2216	1.11e-14	5.47e-14
C05C8.8|C05C8.8|C05C8.8	2.42	15.8	6.5306	2.12e-10	8.15e-10
C05C9.10|C05C9.10	0	0	NaN	NA	NA
C05C9.11|C05C9.11	0	0	NaN	NA	NA
C05C9.12|C05C9.12	0	0	NaN	NA	NA
C05C9.13|C05C9.13	0	0	NaN	NA	NA
C05C9.14|C05C9.14	0	0	NaN	NA	NA
C05C9.1|C05C9.1|C05C9.1	139	206	1.4873	2.71e-56	5.52e-55
C05C9.2|C05C9.2|C05C9.2	22.1	13.6	0.617	0.734	0.866
C05C9.3|C05C9.3|C05C9.3	37.9	39.8	1.0496	0.513	0.665
C05C9.5|C05C9.5	0	0	NaN	NA	NA
C05C9.6|C05C9.6	0	0	NaN	NA	NA
C05C9.7|C05C9.7	4.25	6.12	1.4404	0.0671	0.117
C05C9.8|C05C9.8	0	0	NaN	NA	NA
C05C9.9|C05C9.9	0	0	NaN	NA	NA
C05C9.t1|C05C9.t1	3.22	4.08	1.2689	0.229	0.351
C05C9.t2|C05C9.t2	3.22	4.08	1.2689	0.229	0.351
C05D10.1|C05D10.1|C05D10.1a	1660	1780	1.0757	0.00495	0.0104
C05D10.1|C05D10.1|C05D10.1b	1250	1390	1.1092	0.00277	0.00601
C05D10.1|C05D10.1|C05D10.1c	5440	5910	1.0858	1.81e-06	5.32e-06
C05D10.2|C05D10.2|C05D10.2a	337	417	1.237	1.25e-54	2.44e-53
C05D10.2|C05D10.2|C05D10.2b	401	505	1.2599	2.36e-69	6.44e-68
C05D10.2|C05D10.2|C05D10.2c	322	404	1.255	2.26e-53	4.28e-52
C05D10.4|C05D10.4|C05D10.4a	809	731	0.9041	3.1e-15	1.57e-14
C05D10.4|C05D10.4|C05D10.4b	854	762	0.8932	1.17e-14	5.72e-14
C05D10.4|C05D10.4|C05D10.4c	694	599	0.8631	4.04e-09	1.44e-08
C05D11.10|C05D11.10|C05D11.10	510	508	0.9967	3.39e-08	1.13e-07
C05D11.13|C05D11.13|C05D11.13	365	432	1.1849	0.00364	0.00778
C05D11.1|C05D11.1|C05D11.1	1970	3500	1.774	2.04e-15	1.04e-14
C05D11.5|C05D11.5|C05D11.5	137	103	0.7525	0.105	0.175
C05D11.7|C05D11.7|C05D11.7a	4160	5870	1.4122	9.33e-36	1.11e-34
C05D11.7|C05D11.7|C05D11.7b	2480	3340	1.3455	2.44e-28	2.25e-27
C05D11.8|C05D11.8|C05D11.8	1100	1200	1.0913	0.00291	0.00628
C05D11.9|C05D11.9|C05D11.9	1300	1080	0.8284	2.05e-08	6.93e-08
C05D12.10|C05D12.10	0	0	NaN	NA	NA
C05D12.11|C05D12.11	0.678	0.447	0.659	1	1
C05D12.1|C05D12.1|C05D12.1	451	611	1.355	6.92e-118	3.96e-116
C05D12.2|C05D12.2|C05D12.2	15.5	11.6	0.7504	0.0868	0.148
C05D12.3|C05D12.3	204	214	1.0498	5.39e-28	4.91e-27
C05D12.3|C05D12.3|C05D12.3a	207	218	1.0522	1.63e-28	1.51e-27
C05D12.3|C05D12.3|C05D12.3c	411	430	1.0473	7.62e-61	1.71e-59
C05D12.4|C05D12.4|C05D12.4	558	483	0.865	1.26e-35	1.48e-34
C05D12.5|C05D12.5|C05D12.5	452	256	0.5664	6.68e-42	9.58e-41
C05D12.7|C05D12.7|C05D12.7	31.6	24.8	0.7864	0.0552	0.0977
C05D12.8|C05D12.8	0.695	0.447	0.6431	1	1
C05D12.9|C05D12.9	0.678	0.447	0.659	1	1
C05D2.10|C05D2.10|C05D2.10a	3070	3050	0.9911	2.03e-40	2.77e-39
C05D2.10|C05D2.10|C05D2.10b	1450	1460	1.0071	7.13e-22	4.95e-21
C05D2.11|C05D2.11	340	485	1.4276	3.94e-59	8.57e-58
C05D2.12|C05D2.12	0	0	NaN	NA	NA
C05D2.13|C05D2.13	0	0	NaN	NA	NA
C05D2.14|C05D2.14	10.8	12.8	1.1879	0.00514	0.0107
C05D2.15|C05D2.15	1.39	0.67	0.4809	0.765	0.893
C05D2.16|C05D2.16	2.66	2.26	0.8496	1	1
C05D2.17|C05D2.17	0.23	7.04	30.6591	0.00469	0.00986
C05D2.3|C05D2.3|C05D2.3	6.08	7.37	1.2121	0.00114	0.00258
C05D2.6|C05D2.6|C05D2.6a	1080	1110	1.0292	2.35e-06	6.87e-06
C05D2.6|C05D2.6|C05D2.6b	912	987	1.0818	1.62e-05	4.43e-05
C05D2.8|C05D2.8|C05D2.8	153	134	0.8766	0.00266	0.00577
C05D9.10|C05D9.10	0	0	NaN	NA	NA
C05D9.11|C05D9.11	0	0	NaN	NA	NA
C05D9.3|C05D9.3|C05D9.3	1200	1340	1.1172	0.061	0.107
C05D9.4|C05D9.4|C05D9.4	12.2	17.3	1.4184	0.0212	0.0405
C05D9.7|C05D9.7|C05D9.7	928	763	0.8226	3.34e-21	2.25e-20
C05D9.9|C05D9.9|C05D9.9a	8.32	12.3	1.4846	0.00131	0.00296
C05D9.9|C05D9.9|C05D9.9b	15.6	19.3	1.2391	7.69e-06	2.16e-05
C05E11.10|C05E11.10	49.3	46.5	0.9443	0.0393	0.0715
C05E11.11|C05E11.11	0.238	0.223	0.9405	0.657	0.792
C05E11.12|C05E11.12	0.433	0.894	2.0652	0.508	0.659
C05E11.13|C05E11.13	0	0	NaN	NA	NA
C05E11.14|C05E11.14	0.327	0.447	1.3674	0.669	0.803
C05E11.15|C05E11.15	0.238	0.67	2.8214	0.482	0.638
C05E11.16|C05E11.16	0.478	0	0	1	1
C05E11.17|C05E11.17	0.336	0	0	1	1
C05E11.18|C05E11.18	0	0	NaN	NA	NA
C05E11.2|C05E11.2|C05E11.2	0.115	0.223	1.9445	0.536	0.685
C05E11.3|C05E11.3|C05E11.3	989	675	0.6821	5.21e-12	2.21e-11
C05E11.6|C05E11.6|C05E11.6	16.7	14.8	0.8822	0.0618	0.108
C05E11.7|C05E11.7|C05E11.7	110	126	1.1462	3.47e-18	2.02e-17
C05E11.9|C05E11.9	1.47	2.93	1.9899	0.581	0.722
C05E4.12|C05E4.12|C05E4.12	84.1	103	1.2215	0.497	0.648
C05E4.7|C05E4.7|C05E4.7	5.38	6.37	1.1851	0.0346	0.0636
C05E7.1|C05E7.1|C05E7.1	466	302	0.649	0.0275	0.0514
C05E7.2|C05E7.2|C05E7.2	361	200	0.5539	0.0258	0.0487
C05E7.3|C05E7.3|C05E7.3	36.1	51.2	1.4165	1.69e-11	6.95e-11
C05E7.4|C05E7.4|C05E7.4	4.15	1.79	0.4311	0.711	0.842
C05E7.5|C05E7.5	0	0.223	Inf	0.472	0.63
C05E7.6|C05E7.6	0	0.223	Inf	0.472	0.63
C05E7.t1|C05E7.t1	0.318	3.63	11.4345	0.187	0.293
C05E7.t2|C05E7.t2	0.318	3.63	11.4345	0.187	0.293
C05E7.t3|C05E7.t3	3.22	4.08	1.2689	0.229	0.351
C05G5.10|C05G5.10	0.351	0	0	1	1
C05G5.1|C05G5.1|C05G5.1	294	320	1.0882	8.56e-24	6.54e-23
C05G5.2|C05G5.2|C05G5.2	861	834	0.9687	1.58e-05	4.33e-05
C05G5.3|C05G5.3|C05G5.3	363	283	0.7802	0.0277	0.0518
C05G5.4|C05G5.4|C05G5.4	3440	3190	0.9263	9.1e-41	1.26e-39
C05G5.5|C05G5.5|C05G5.5	422	415	0.9837	0.000209	0.00051
C05G5.7|C05G5.7|C05G5.7	6.77	6.06	0.895	0.482	0.638
C05G5.8|C05G5.8	0	0.223	Inf	0.472	0.63
C05G5.9|C05G5.9	3.71	4.75	1.2811	1	1
C05G6.4|C05G6.4	4.83	17.1	3.5281	0.634	0.776
C05G6.5|C05G6.5	4.83	17.3	3.5743	0.485	0.638
C05G6.t1|C05G6.t1	0.151	0	0	1	1
C05H8.3|C05H8.3	7.96	14.8	1.8538	0.163	0.259
C05H8.4|C05H8.4	1.37	1.12	0.8147	0.904	1
C06A1.10|C06A1.10	0	0	NaN	NA	NA
C06A1.11|C06A1.11	0	0	NaN	NA	NA
C06A1.2|C06A1.2|C06A1.2	164	119	0.723	0.97	1
C06A1.3|C06A1.3|C06A1.3	5.96	8.13	1.3651	0.667	0.801
C06A1.4|C06A1.4	426	669	1.5712	0.231	0.354
C06A1.6|C06A1.6|C06A1.6	10.8	2.46	0.2271	0.0208	0.0398
C06A1.7|C06A1.7|C06A1.7	7.48	1.12	0.1494	0.0101	0.0203
C06A1.8|C06A1.8	0.952	2.01	2.1117	0.044	0.0793
C06A1.9|C06A1.9	0	0	NaN	NA	NA
C06A12.17|C06A12.17	0	0	NaN	NA	NA
C06A12.18|C06A12.18	0	0	NaN	NA	NA
C06A12.3|C06A12.3|C06A12.3a	75.2	74.2	0.9866	0.00354	0.00756
C06A12.3|C06A12.3|C06A12.3b	115	116	1.0104	0.000427	0.00101
C06A12.3|C06A12.3|C06A12.3c	33.5	38.3	1.1419	0.0617	0.108
C06A12.8|C06A12.8|C06A12.8	0.229	0.223	0.9773	0.65	0.787
C06A5.10|C06A5.10|C06A5.10	33.6	34.7	1.034	0.751	0.883
C06A5.12|C06A5.12|C06A5.12	95.1	129	1.3574	0.651	0.787
C06A5.1|C06A5.1|C06A5.1	2010	2040	1.0165	2.6e-21	1.76e-20
C06A5.2|C06A5.2|C06A5.2	15.3	23.2	1.516	1.68e-05	4.57e-05
C06A5.3|C06A5.3|C06A5.3a	3220	3320	1.0298	0.691	0.823
C06A5.3|C06A5.3|C06A5.3b	1510	1580	1.043	0.73	0.862
C06A5.4|C06A5.4|C06A5.4	57.4	35.1	0.6122	0.0107	0.0215
C06A5.5|C06A5.5|C06A5.5	102	122	1.1945	0.11	0.184
C06A5.6|C06A5.6|C06A5.6	997	2320	2.3325	1.52e-46	2.47e-45
C06A5.8|C06A5.8|C06A5.8a	113	245	2.1733	0.0872	0.148
C06A5.8|C06A5.8|C06A5.8b	202	466	2.3077	0.00135	0.00305
C06A6.10|C06A6.10	0.352	0.223	0.6339	1	1
C06A6.11|C06A6.11	0.352	0.223	0.6339	1	1
C06A6.12|C06A6.12	0.335	2.26	6.7672	0.217	0.335
C06A6.13|C06A6.13	0.335	1.82	5.4316	0.784	0.909
C06A6.14|C06A6.14	0.106	0	0	1	1
C06A6.2|C06A6.2|C06A6.2a	1420	1180	0.8293	5.85e-05	0.000151
C06A6.2|C06A6.2|C06A6.2b	1450	1190	0.8221	2.76e-05	7.34e-05
C06A6.4|C06A6.4|C06A6.4a	1560	1950	1.2519	0.141	0.23
C06A6.4|C06A6.4|C06A6.4b	852	1050	1.2311	0.11	0.183
C06A6.5|C06A6.5|C06A6.5	1490	1080	0.7242	2.7e-21	1.83e-20
C06A6.7|C06A6.7|C06A6.7	23.7	14.3	0.6046	0.928	1
C06A6.9|C06A6.9	0.106	1.82	17.1517	0.415	0.582
C06A8.13|C06A8.13	0	0	NaN	NA	NA
C06A8.14|C06A8.14	0	0	NaN	NA	NA
C06A8.15|C06A8.15	0	0	NaN	NA	NA
C06A8.16|C06A8.16	1.2	3.41	2.8483	1	1
C06A8.17|C06A8.17	1.76	0	0	1	1
C06A8.1|C06A8.1|C06A8.1a	3540	3490	0.9841	2.7e-17	1.51e-16
C06A8.1|C06A8.1|C06A8.1b	1970	1910	0.9687	5.91e-09	2.08e-08
C06A8.2|C06A8.2|C06A8.2	1030	1180	1.1488	0.00428	0.00906
C06A8.3|C06A8.3|C06A8.3	2370	2010	0.8453	7e-107	3.48e-105
C06A8.6|C06A8.6|C06A8.6	26.2	17.7	0.6742	0.848	0.967
C06A8.8|C06A8.8|C06A8.8a	381	195	0.5116	1.57e-09	5.76e-09
C06A8.8|C06A8.8|C06A8.8b	822	421	0.512	1.33e-21	9.11e-21
C06B3.16|C06B3.16|C06B3.16	0.569	1.34	2.3547	0.158	0.252
C06B3.1|C06B3.1|C06B3.1	0.863	0.223	0.2588	0.952	1
C06B3.6|C06B3.6|C06B3.6	371	486	1.3098	9.45e-27	8.21e-26
C06B3.7|C06B3.7|C06B3.7	13.3	24.1	1.8179	0.00313	0.00675
C06B8.11|C06B8.11|C06B8.11	0.106	0	0	1	1
C06B8.13|C06B8.13	0	0	NaN	NA	NA
C06B8.14|C06B8.14	0.123	0	0	1	1
C06B8.15|C06B8.15	6.16	10.4	1.688	0.142	0.231
C06B8.2|C06B8.2|C06B8.2a	314	252	0.8028	6.4e-14	3.02e-13
C06B8.2|C06B8.2|C06B8.2b	718	562	0.7826	4.18e-24	3.24e-23
C06B8.2|C06B8.2|C06B8.2c	379	294	0.7771	5.57e-14	2.64e-13
C06B8.2|C06B8.2|C06B8.2d	398	308	0.7749	5.31e-15	2.66e-14
C06B8.3|C06B8.3|C06B8.3	0.151	0.447	2.95	0.486	0.638
C06B8.7|C06B8.7|C06B8.7	3910	4240	1.0856	4.32e-77	1.38e-75
C06B8.t1|C06B8.t1	0	0.223	Inf	0.472	0.63
C06B8.t2|C06B8.t2	0	9.56	Inf	0.000822	0.0019
C06B8.t3|C06B8.t3	3.3	7.94	2.405	0.141	0.229
C06C3.10|C06C3.10|C06C3.10	122	117	0.9643	3.51e-16	1.86e-15
C06C3.11|C06C3.11	46.7	53.4	1.1438	5.65e-19	3.42e-18
C06C3.12|C06C3.12|C06C3.12	21.9	38.6	1.7648	0.000488	0.00115
C06C3.13|C06C3.13	0	0	NaN	NA	NA
C06C3.3|C06C3.3|C06C3.3	88.5	113	1.2793	2.68e-31	2.72e-30
C06C3.4|C06C3.4|C06C3.4	355	311	0.8758	0.000793	0.00183
C06C3.5|C06C3.5	22.3	34.5	1.5494	0.000453	0.00107
C06C3.7|C06C3.7|C06C3.7	116	129	1.1101	4.25e-06	1.22e-05
C06C3.8|C06C3.8|C06C3.8	28.8	22.8	0.7945	0.0241	0.0456
C06C3.9|C06C3.9|C06C3.9	136	136	0.9987	0.028	0.0522
C06C6.10|C06C6.10	11.9	3.83	0.3225	0.00203	0.00448
C06C6.1|C06C6.1|C06C6.1	1.27	1.82	1.4294	1	1
C06C6.6|C06C6.6|C06C6.6	3.12	1.12	0.3581	1	1
C06C6.7|C06C6.7|C06C6.7	3.12	5.17	1.656	0.134	0.22
C06C6.8|C06C6.8|C06C6.8	1.35	6.51	4.8055	2.17e-06	6.36e-06
C06C6.9|C06C6.9|C06C6.9	0.151	0.67	4.4251	0.41	0.577
C06E1.11|C06E1.11|C06E1.11	43.6	33.6	0.7713	0.0493	0.088
C06E1.12|C06E1.12	0.106	0	0	1	1
C06E1.13|C06E1.13	0	0	NaN	NA	NA
C06E1.14|C06E1.14	0	0.223	Inf	0.472	0.63
C06E1.15|C06E1.15	0	0	NaN	NA	NA
C06E1.1|C06E1.1|C06E1.1	913	571	0.625	4.31e-43	6.41e-42
C06E1.3|C06E1.3|C06E1.3	241	268	1.1136	7.65e-24	5.85e-23
C06E1.7|C06E1.7|C06E1.7	30.2	32.3	1.0689	5.37e-06	1.53e-05
C06E1.9|C06E1.9|C06E1.9	649	868	1.3365	1.1e-12	4.86e-12
C06E2.11|C06E2.11	71.9	217	3.0221	2.98e-09	1.07e-08
C06E2.12|C06E2.12	0	0	NaN	NA	NA
C06E2.13|C06E2.13	0	0	NaN	NA	NA
C06E2.14|C06E2.14	0	0	NaN	NA	NA
C06E2.1|C06E2.1|C06E2.1	127	119	0.9375	7.82e-14	3.67e-13
C06E2.2|C06E2.2|C06E2.2	0.671	0.67	0.999	0.759	0.888
C06E2.5|C06E2.5|C06E2.5	952	738	0.7753	2.05e-38	2.65e-37
C06E2.9|C06E2.9|C06E2.9	11	4.5	0.4096	0.0177	0.0342
C06E4.15|C06E4.15	0.115	0.223	1.9445	0.536	0.685
C06E4.16|C06E4.16	0	0	NaN	NA	NA
C06E4.17|C06E4.17	0	0	NaN	NA	NA
C06E4.18|C06E4.18	0	0	NaN	NA	NA
C06E4.19|C06E4.19	0.352	0.447	1.2678	0.678	0.811
C06E4.1|C06E4.1|C06E4.1	0.106	0.447	4.2176	0.487	0.638
C06E4.20|C06E4.20	0.318	3.63	11.4345	0.187	0.293
C06E4.21|C06E4.21	0	0	NaN	NA	NA
C06E4.2|C06E4.2|C06E4.2	140	89.5	0.638	0.00065	0.00151
C06E4.3|C06E4.3|C06E4.3	15.3	30	1.9661	2.76e-14	1.33e-13
C06E4.4|C06E4.4|C06E4.4	0.123	1.12	9.1071	0.25	0.377
C06E4.5|C06E4.5|C06E4.5	0.645	1.82	2.8189	1	1
C06E4.6|C06E4.6|C06E4.6	8.96	44.1	4.9255	3.21e-43	4.8e-42
C06E4.8|C06E4.8|C06E4.8	5.79	12.8	2.2027	3.89e-08	1.29e-07
C06E4.t1|C06E4.t1	0.318	3.63	11.4345	0.187	0.293
C06E7.2|C06E7.2|C06E7.2	634	541	0.8532	3.12e-20	2.01e-19
C06E7.4|C06E7.4|C06E7.4	1140	1520	1.3336	1.47e-09	5.4e-09
C06E7.88|C06E7.88|C06E7.88	535	356	0.665	6.35e-06	1.8e-05
C06E7.89|C06E7.89	0.123	0	0	1	1
C06E7.90|C06E7.90	0	0	NaN	NA	NA
C06E7.91|C06E7.91	0	0	NaN	NA	NA
C06E7.92|C06E7.92	0.123	0	0	1	1
C06E7.93|C06E7.93	3.01	0.447	0.1485	0.361	0.519
C06E7.94|C06E7.94	0	0	NaN	NA	NA
C06E8.5|C06E8.5|C06E8.5	156	67.1	0.431	6.64e-06	1.87e-05
C06E8.6|C06E8.6	0	0	NaN	NA	NA
C06E8.7|C06E8.7	0.106	0	0	1	1
C06G1.10|C06G1.10	13	17.2	1.3241	0.488	0.639
C06G1.11|C06G1.11	2.84	35.3	12.4222	1.64e-06	4.84e-06
C06G1.12|C06G1.12	1.72	1.34	0.7805	1	1
C06G1.13|C06G1.13	0.123	0	0	1	1
C06G1.14|C06G1.14	0	0	NaN	NA	NA
C06G1.15|C06G1.15	2.84	35.3	12.4222	1.64e-06	4.84e-06
C06G1.16|C06G1.16	2.38	0.67	0.2817	0.556	0.701
C06G1.17|C06G1.17	1.74	0.447	0.2562	0.236	0.36
C06G1.1|C06G1.1|C06G1.1a	754	630	0.8357	2.54e-16	1.36e-15
C06G1.1|C06G1.1|C06G1.1b	897	716	0.7985	9.94e-16	5.17e-15
C06G1.2|C06G1.2|C06G1.2	309	222	0.7163	3.99e-05	0.000105
C06G1.5|C06G1.5|C06G1.5	1120	1160	1.0286	0.167	0.266
C06G1.6|C06G1.6|C06G1.6	803	834	1.0387	1.95e-08	6.61e-08
C06G1.7|C06G1.7	0	0.223	Inf	0.472	0.63
C06G1.8|C06G1.8	0.856	1.12	1.3042	0.552	0.698
C06G1.9|C06G1.9	0.106	0.223	2.1088	0.533	0.683
C06G1.t1|C06G1.t1	1.39	19.8	14.2094	0.00357	0.00762
C06G1.t2|C06G1.t2	1.59	32.5	20.4961	1.88e-05	5.09e-05
C06G1.t3|C06G1.t3	1.59	32.5	20.4961	1.88e-05	5.09e-05
C06G1.t4|C06G1.t4	1.25	19.3	15.5327	6.85e-05	0.000176
C06G3.3|C06G3.3|C06G3.3	7.1	4.69	0.6603	0.389	0.553
C06G3.4|C06G3.4|C06G3.4	2.23	2.93	1.3141	1	1
C06G3.5|C06G3.5|C06G3.5a	1070	1270	1.1924	0.0553	0.0978
C06G3.5|C06G3.5|C06G3.5b	1890	2320	1.2276	0.00259	0.00563
C06G3.6|C06G3.6|C06G3.6	2200	2280	1.0331	1.81e-11	7.42e-11
C06G3.8|C06G3.8|C06G3.8	346	332	0.9594	6.84e-10	2.56e-09
C06G3.9|C06G3.9|C06G3.9	2650	2860	1.0785	9.05e-20	5.71e-19
C06G4.1|C06G4.1|C06G4.1	807	963	1.1931	0.0716	0.124
C06G4.4|C06G4.4|C06G4.4	13.2	25.6	1.936	0.118	0.196
C06G4.6|C06G4.6|C06G4.6	25.7	15.4	0.599	0.39	0.555
C06G4.7|C06G4.7	1.69	10.2	6.0625	0.297	0.439
C06G4.t1|C06G4.t1	1.69	8.64	5.1183	0.462	0.63
C06G8.1|C06G8.1|C06G8.1	394	470	1.1925	3.87e-19	2.37e-18
C06G8.3|C06G8.3	296	249	0.8419	0.000288	0.000695
C06G8.3|C06G8.3|C06G8.3b	270	226	0.8365	0.00231	0.00505
C06G8.3|C06G8.3|C06G8.3c	292	238	0.8161	0.0121	0.024
C06H2.10|C06H2.10	0.106	0	0	1	1
C06H2.2|C06H2.2|C06H2.2	757	596	0.7867	0.186	0.292
C06H2.3|C06H2.3|C06H2.3	954	1190	1.2442	0.73	0.862
C06H2.6|C06H2.6|C06H2.6	907	1170	1.2896	0.616	0.757
C06H2.7|C06H2.7|C06H2.7	865	893	1.0326	3.9e-22	2.74e-21
C06H2.9|C06H2.9	0	0	NaN	NA	NA
C06H5.6|C06H5.6|C06H5.6	332	223	0.6713	1.18e-13	5.46e-13
C06H5.7|C06H5.7|C06H5.7	989	1170	1.1833	6.45e-12	2.72e-11
C06H5.8|C06H5.8|C06H5.8	70	63.4	0.9054	0.063	0.11
C06H5.9|C06H5.9	0.151	0	0	1	1
C07A12.10|C07A12.10	0.106	0.223	2.1088	0.533	0.683
C07A12.11|C07A12.11	0.106	0	0	1	1
C07A12.12|C07A12.12	0	0.223	Inf	0.472	0.63
C07A12.13|C07A12.13	0.123	0.223	1.8214	0.539	0.685
C07A12.14|C07A12.14	0.351	0.894	2.5441	0.437	0.604
C07A12.15|C07A12.15	0	0	NaN	NA	NA
C07A12.16|C07A12.16	0	0.223	Inf	0.472	0.63
C07A12.17|C07A12.17	0.115	0	0	1	1
C07A12.2|C07A12.2|C07A12.2	3.1	5.36	1.7301	0.00197	0.00434
C07A12.7|C07A12.7|C07A12.7a	2330	2290	0.9841	1.47e-05	4.03e-05
C07A12.7|C07A12.7|C07A12.7b	976	969	0.9931	0.0155	0.0302
C07A12.7|C07A12.7|C07A12.7c	1490	1480	0.9888	0.000724	0.00168
C07A12.9|C07A12.9	0	0	NaN	NA	NA
C07A4.2|C07A4.2|C07A4.2	46.5	42.3	0.9087	5.79e-10	2.17e-09
C07A4.3|C07A4.3|C07A4.3	0.469	1.56	3.3324	0.108	0.181
C07A4.4|C07A4.4	0.849	1.12	1.3152	0.441	0.608
C07A4.5|C07A4.5	0	0	NaN	NA	NA
C07A4.6|C07A4.6	0	0	NaN	NA	NA
C07A4.7|C07A4.7	0.743	1.12	1.5026	0.395	0.56
C07A4.8|C07A4.8	0	0	NaN	NA	NA
C07A4.9|C07A4.9	0	0	NaN	NA	NA
C07A9.10|C07A9.10|C07A9.10	3.13	3.6	1.1509	0.655	0.791
C07A9.12|C07A9.12|C07A9.12	225	192	0.8525	0.000382	0.000908
C07A9.13|C07A9.13|C07A9.13	80.7	109	1.3534	2.34e-27	2.08e-26
C07A9.14|C07A9.14	3.89	4.3	1.1052	1	1
C07A9.15|C07A9.15	1.37	0.223	0.1633	0.962	1
C07A9.16|C07A9.16	2.49	4.97	2.0003	0.655	0.791
C07A9.2|C07A9.2|C07A9.2	1220	1380	1.1341	2.43e-14	1.17e-13
C07A9.5|C07A9.5|C07A9.5	88.5	87.8	0.9916	3.7e-11	1.49e-10
C07A9.8|C07A9.8|C07A9.8	8.83	20.5	2.3185	1.01e-06	3.04e-06
C07A9.9|C07A9.9|C07A9.9	304	394	1.2975	5.02e-39	6.61e-38
C07B5.2|C07B5.2|C07B5.2	6.21	2.46	0.3955	0.62	0.762
C07B5.3|C07B5.3|C07B5.3	9.94	8.27	0.8319	0.05	0.0893
C07B5.4|C07B5.4|C07B5.4a	642	735	1.1456	1.28e-44	1.98e-43
C07B5.4|C07B5.4|C07B5.4b	474	563	1.1871	4.32e-34	4.84e-33
C07B5.6|C07B5.6|C07B5.6	61.9	42.2	0.6827	0.883	0.999
C07B5.8|C07B5.8|C07B5.8	30.8	20.9	0.6795	1	1
C07B5.9|C07B5.9	1.38	0.223	0.1621	0.187	0.293
C07C7.1|C07C7.1|C07C7.1	16.8	10.3	0.6104	0.224	0.345
C07D10.1|C07D10.1|C07D10.1	261	255	0.9761	5.08e-18	2.94e-17
C07D10.5|C07D10.5|C07D10.5	3530	3480	0.9864	3.62e-65	8.99e-64
C07D10.6|C07D10.6|C07D10.6	8.08	3.83	0.4737	0.197	0.307
C07D8.2|C07D8.2	10.5	3.8	0.3629	0.339	0.491
C07D8.5|C07D8.5|C07D8.5	0	0	NaN	NA	NA
C07D8.6|C07D8.6|C07D8.6	1450	1520	1.0429	3.27e-43	4.89e-42
C07E3.10|C07E3.10|C07E3.10	178	121	0.6813	0.201	0.313
C07E3.13|C07E3.13	0	0	NaN	NA	NA
C07E3.14|C07E3.14	0	0	NaN	NA	NA
C07E3.15|C07E3.15	0	0	NaN	NA	NA
C07E3.16|C07E3.16	0	0	NaN	NA	NA
C07E3.3|C07E3.3|C07E3.3	543	884	1.6268	1.38e-73	4.13e-72
C07E3.4|C07E3.4|C07E3.4	31.9	74.8	2.3422	0.00115	0.0026
C07E3.6|C07E3.6|C07E3.6	885	976	1.1024	0.0326	0.0603
C07E3.8|C07E3.8|C07E3.8	36.9	24.6	0.6666	0.00287	0.0062
C07E3.9|C07E3.9|C07E3.9	200	172	0.8599	0.854	0.972
C07F11.2|C07F11.2|C07F11.2	52.3	66.6	1.2727	9e-06	2.51e-05
C07G1.10|C07G1.10	0	0	NaN	NA	NA
C07G1.11|C07G1.11	0.495	0	0	1	1
C07G1.12|C07G1.12	1.5	0.894	0.5962	0.975	1
C07G1.13|C07G1.13	1.25	0	0	0.6	0.741
C07G1.14|C07G1.14	1.29	1.79	1.3828	0.237	0.36
C07G1.2|C07G1.2|C07G1.2	37.8	62	1.6424	3.23e-17	1.8e-16
C07G1.6|C07G1.6|C07G1.6	1.86	6.76	3.6332	0.00269	0.00584
C07G1.7|C07G1.7|C07G1.7	5.11	9.02	1.7645	0.0275	0.0514
C07G2.4|C07G2.4	2.48	1.12	0.4508	0.428	0.597
C07G3.10|C07G3.10|C07G3.10	7.33	15.4	2.1	0.392	0.556
C07G3.13|C07G3.13	0.221	0	0	1	1
C07G3.8|C07G3.8|C07G3.8	8.99	7.88	0.876	0.547	0.694
C07H4.1|C07H4.1|C07H4.1	126	97.3	0.7729	0.00084	0.00193
C07H4.3|C07H4.3	0.212	1.59	7.5215	1	1
C07H4.4|C07H4.4	0.212	1.59	7.5215	1	1
C07H6.10|C07H6.10	0.424	7.97	18.8036	0.138	0.224
C07H6.11|C07H6.11	0.106	0	0	1	1
C07H6.12|C07H6.12	0.466	2.04	4.3774	0.588	0.729
C07H6.13|C07H6.13	0.212	0.447	2.1088	0.565	0.708
C07H6.14|C07H6.14	0	0	NaN	NA	NA
C07H6.15|C07H6.15	0.335	3.19	9.5276	0.83	0.951
C07H6.16|C07H6.16	0.343	2.04	5.9405	0.446	0.614
C07H6.17|C07H6.17	0.106	0.894	8.4351	0.346	0.501
C07H6.18|C07H6.18	0.115	0	0	1	1
C07H6.2|C07H6.2|C07H6.2	396	453	1.1423	0.000103	0.000261
C07H6.4|C07H6.4|C07H6.4	2130	3220	1.512	0.00725	0.0148
C07H6.9|C07H6.9|C07H6.9	54.2	29.9	0.5518	0.0344	0.0633
C08A9.10|C08A9.10|C08A9.10	3.57	0.894	0.2502	0.0793	0.136
C08A9.11|C08A9.11	0.743	2.04	2.7448	0.925	1
C08A9.12|C08A9.12	0.151	0	0	1	1
C08A9.2|C08A9.2	28.3	9.67	0.3416	0.00061	0.00142
C08A9.3|C08A9.3|C08A9.3a	5.13	6.51	1.2698	0.0548	0.0971
C08A9.3|C08A9.3|C08A9.3b	4.1	6.95	1.6944	0.00219	0.00481
C08A9.6|C08A9.6|C08A9.6	331	270	0.8171	3.6e-05	9.49e-05
C08A9.8|C08A9.8|C08A9.8	71.9	66.1	0.9184	0.786	0.911
C08A9.9|C08A9.9|C08A9.9	14.6	14.2	0.9702	0.965	1
C08B11.11|C08B11.11	0.23	0.223	0.9723	0.651	0.787
C08B11.12|C08B11.12	0.442	0	0	1	1
C08B11.13|C08B11.13	0	0.447	Inf	0.436	0.602
C08B11.3|C08B11.3|C08B11.3	9290	11100	1.1983	0	0
C08B11.6|C08B11.6|C08B11.6	1830	2170	1.1812	3.68e-20	2.38e-19
C08B11.8|C08B11.8|C08B11.8	585	514	0.8784	2.21e-06	6.47e-06
C08B11.9|C08B11.9|C08B11.9	550	774	1.4059	0.014	0.0275
C08B6.10|C08B6.10|C08B6.10	37.8	41.6	1.099	0.0247	0.0467
C08B6.11|C08B6.11|C08B6.11	171	131	0.7629	8.39e-08	2.73e-07
C08B6.14|C08B6.14|C08B6.14	0.212	0.894	4.2176	0.395	0.559
C08B6.15|C08B6.15	4.42	9.44	2.1349	0.000137	0.00034
C08B6.16|C08B6.16	0.363	0.67	1.8446	0.558	0.703
C08B6.17|C08B6.17	157	124	0.7912	4.04e-05	0.000106
C08B6.2|C08B6.2|C08B6.2a	2.06	6.06	2.945	1.34e-05	3.68e-05
C08B6.2|C08B6.2|C08B6.2b	2.06	5.84	2.8364	3.26e-05	8.62e-05
C08B6.2|C08B6.2|C08B6.2c	2.16	6.06	2.8008	2.73e-05	7.28e-05
C08B6.3|C08B6.3|C08B6.3	212	281	1.3268	1.57e-87	6.04e-86
C08B6.4|C08B6.4|C08B6.4a	1660	1170	0.7054	9.09e-14	4.25e-13
C08B6.4|C08B6.4|C08B6.4b	1680	1190	0.7052	1.41e-13	6.52e-13
C08B6.5|C08B6.5|C08B6.5	10.5	10.1	0.953	0.0157	0.0307
C08B6.6|C08B6.6|C08B6.6	1.37	0.67	0.4892	0.886	1
C08B6.7|C08B6.7|C08B6.7a	3210	3770	1.1738	0.295	0.437
C08B6.7|C08B6.7|C08B6.7b	1780	2020	1.1368	0.975	1
C08B6.8|C08B6.8|C08B6.8	653	378	0.5791	4.64e-26	3.91e-25
C08C3.10|C08C3.10	0	0	NaN	NA	NA
C08C3.11|C08C3.11	0	0	NaN	NA	NA
C08C3.4|C08C3.4|C08C3.4a	380	440	1.1576	4.8e-13	2.15e-12
C08C3.4|C08C3.4|C08C3.4b	318	356	1.1187	2.5e-13	1.14e-12
C08C3.6|C08C3.6	0	0	NaN	NA	NA
C08C3.7|C08C3.7	0	0	NaN	NA	NA
C08C3.8|C08C3.8	0.123	0.223	1.8214	0.539	0.685
C08C3.9|C08C3.9	0.123	0.223	1.8214	0.539	0.685
C08D8.1|C08D8.1|C08D8.1	8.55	6.06	0.7091	0.898	1
C08D8.3|C08D8.3	0.257	6.37	24.7654	0.102	0.171
C08D8.4|C08D8.4	0	0	NaN	NA	NA
C08D8.5|C08D8.5	0.106	0	0	1	1
C08D8.6|C08D8.6	0	0.223	Inf	0.472	0.63
C08E3.13|C08E3.13|C08E3.13	27.6	40.5	1.4652	8.85e-18	5.06e-17
C08E3.14|C08E3.14|C08E3.14	0	1.82	Inf	0.232	0.355
C08E3.15|C08E3.15|C08E3.15	0.115	0	0	1	1
C08E3.1|C08E3.1|C08E3.1	9.27	17	1.8343	1.74e-09	6.36e-09
C08E8.10|C08E8.10|C08E8.10	41.1	47	1.1433	2.84e-08	9.54e-08
C08E8.11|C08E8.11|C08E8.11	0	1.82	Inf	0.232	0.355
C08E8.12|C08E8.12	0	0	NaN	NA	NA
C08E8.13|C08E8.13	0	0	NaN	NA	NA
C08E8.14|C08E8.14	0	0	NaN	NA	NA
C08E8.15|C08E8.15	0	0	NaN	NA	NA
C08E8.1|C08E8.1|C08E8.1	8.2	17.9	2.1792	7.39e-12	3.1e-11
C08E8.2|C08E8.2|C08E8.2	1.53	3.63	2.3703	0.975	1
C08E8.3|C08E8.3|C08E8.3	17.6	80.7	4.573	1.04e-44	1.61e-43
C08E8.4|C08E8.4|C08E8.4	20.8	103	4.9721	3.1e-67	8.02e-66
C08E8.5|C08E8.5|C08E8.5	0.478	0.447	0.9343	0.812	0.935
C08E8.6|C08E8.6|C08E8.6	2.25	2.23	0.9922	0.422	0.589
C08E8.7|C08E8.7	4.39	7.24	1.6474	1	1
C08E8.8|C08E8.8	0.878	0.67	0.7632	1	1
C08E8.9|C08E8.9|C08E8.9	2.25	2.23	0.9922	0.422	0.589
C08E8.t1|C08E8.t1	0	0	NaN	NA	NA
C08E8.t2|C08E8.t2	0	0	NaN	NA	NA
C08E8.t3|C08E8.t3	0	0	NaN	NA	NA
C08F1.10|C08F1.10|C08F1.10	1620	1320	0.815	1.02e-72	2.98e-71
C08F1.11|C08F1.11|C08F1.11	735	599	0.8151	2.36e-11	9.65e-11
C08F1.6|C08F1.6|C08F1.6	1340	998	0.7469	6.05e-86	2.25e-84
C08F1.8|C08F1.8|C08F1.8	181	254	1.4005	4.7e-11	1.88e-10
C08F11.10|C08F11.10|C08F11.10	4.95	14	2.8316	0.0641	0.112
C08F11.116|C08F11.116	0.123	0.223	1.8214	0.539	0.685
C08F11.11|C08F11.11|C08F11.11	1.4	0	0	0.0438	0.079
C08F11.12|C08F11.12|C08F11.12	0	0	NaN	NA	NA
C08F11.13|C08F11.13|C08F11.13	864	497	0.5744	1.01e-09	3.73e-09
C08F11.14|C08F11.14	1.33	0.223	0.1678	0.962	1
C08F11.16|C08F11.16	0.858	6.82	7.9477	0.229	0.351
C08F11.17|C08F11.17|C08F11.17	0	0	NaN	NA	NA
C08F11.18|C08F11.18	0	0	NaN	NA	NA
C08F11.19|C08F11.19	0	0	NaN	NA	NA
C08F11.1|C08F11.1|C08F11.1	7.74	10.1	1.2987	0.0005	0.00118
C08F11.2|C08F11.2|C08F11.2	0.151	0.223	1.475	0.552	0.697
C08F11.3|C08F11.3|C08F11.3	0.303	1.12	3.6875	0.246	0.372
C08F11.6|C08F11.6	13.1	41.3	3.1467	0.000806	0.00186
C08F11.7|C08F11.7|C08F11.7	5.45	13.6	2.4937	0.0221	0.0422
C08F8.10|C08F8.10	0.106	0.223	2.1088	0.533	0.683
C08F8.11|C08F8.11	1.14	0.447	0.3921	0.826	0.948
C08F8.12|C08F8.12	0.38	0.223	0.5878	1	1
C08F8.13|C08F8.13	0.123	0.223	1.8214	0.539	0.685
C08F8.14|C08F8.14	0.345	1.12	3.2409	0.318	0.465
C08F8.2|C08F8.2|C08F8.2a	722	790	1.0935	0.137	0.224
C08F8.2|C08F8.2|C08F8.2b	678	763	1.1248	0.0969	0.163
C08F8.3|C08F8.3|C08F8.3	934	1010	1.078	7.44e-20	4.72e-19
C08F8.6|C08F8.6|C08F8.6	71.7	69.6	0.9698	0.11	0.183
C08F8.9|C08F8.9|C08F8.9	170	335	1.9627	0.00185	0.0041
C08G5.1|C08G5.1|C08G5.1	0.76	1.12	1.4696	0.385	0.549
C08G5.3|C08G5.3|C08G5.3	8.9	7.91	0.8888	0.535	0.685
C08G5.5|C08G5.5|C08G5.5	261	184	0.7054	0.735	0.867
C08G5.6|C08G5.6|C08G5.6	11.5	10.5	0.9119	0.00112	0.00254
C08G5.7|C08G5.7|C08G5.7a	46.4	44.5	0.9584	0.169	0.269
C08G5.7|C08G5.7|C08G5.7b	46.2	44.5	0.963	0.152	0.244
C08G5.9|C08G5.9	0	0	NaN	NA	NA
C08G9.10|C08G9.10	0.106	0.223	2.1088	0.533	0.683
C08G9.1|C08G9.1|C08G9.1	290	205	0.7086	0.00108	0.00246
C08G9.2|C08G9.2|C08G9.2	814	825	1.014	2.51e-36	3.03e-35
C08G9.4|C08G9.4	0	0.447	Inf	0.436	0.602
C08G9.5|C08G9.5	0.496	0.223	0.4503	1	1
C08G9.6|C08G9.6	2.14	1.56	0.7319	0.0462	0.0829
C08G9.7|C08G9.7	0	0.447	Inf	0.436	0.602
C08G9.8|C08G9.8	0	0	NaN	NA	NA
C08G9.9|C08G9.9	0	0.223	Inf	0.472	0.63
C08H9.10|C08H9.10|C08H9.10	1.27	4.69	3.7024	6.21e-06	1.76e-05
C08H9.11|C08H9.11|C08H9.11	0.753	2.23	2.9648	0.00668	0.0138
C08H9.12|C08H9.12|C08H9.12	1	1.34	1.3378	0.312	0.456
C08H9.13|C08H9.13|C08H9.13	3.11	4.24	1.3638	0.0253	0.0477
C08H9.14|C08H9.14|C08H9.14	0.69	2.46	3.561	0.00276	0.00599
C08H9.15|C08H9.15|C08H9.15	205	152	0.7402	0.0253	0.0478
C08H9.16|C08H9.16|C08H9.16	519	543	1.0461	0.102	0.171
C08H9.1|C08H9.1|C08H9.1	22	14.5	0.6608	0.345	0.499
C08H9.2|C08H9.2|C08H9.2a	6800	9990	1.4688	4.62e-37	5.73e-36
C08H9.2|C08H9.2|C08H9.2b	11000	15700	1.4233	1.38e-76	4.37e-75
C08H9.3|C08H9.3|C08H9.3a	549	448	0.8168	3.56e-14	1.7e-13
C08H9.3|C08H9.3|C08H9.3b	217	173	0.7943	1.03e-05	2.86e-05
C08H9.4|C08H9.4|C08H9.4a	5.56	7.71	1.3879	0.574	0.716
C08H9.4|C08H9.4|C08H9.4b	3	2.46	0.8189	0.0563	0.0995
C08H9.6|C08H9.6|C08H9.6	1.83	1.34	0.7334	1	1
C08H9.7|C08H9.7|C08H9.7	1.37	2.9	2.1226	0.000185	0.000453
C08H9.8|C08H9.8	0.23	0	0	1	1
C08H9.9|C08H9.9	2.39	7.49	3.1402	0.235	0.359
C09B7.10|C09B7.10	0	0	NaN	NA	NA
C09B7.11|C09B7.11	0	0	NaN	NA	NA
C09B7.12|C09B7.12	0	0	NaN	NA	NA
C09B7.2|C09B7.2|C09B7.2	465	421	0.905	0.484	0.638
C09B7.3|C09B7.3	0	0	NaN	NA	NA
C09B7.4|C09B7.4	0.221	0.67	3.035	0.485	0.638
C09B7.5|C09B7.5	0	0	NaN	NA	NA
C09B7.6|C09B7.6	0.151	0	0	1	1
C09B7.7|C09B7.7	0	0	NaN	NA	NA
C09B7.8|C09B7.8	0	0	NaN	NA	NA
C09B7.9|C09B7.9	0	0	NaN	NA	NA
C09B8.10|C09B8.10	0.115	0	0	1	1
C09B8.11|C09B8.11	0.335	1.59	4.7638	1	1
C09B8.12|C09B8.12	6.54	2.9	0.4439	0.297	0.439
C09B8.13|C09B8.13	0.115	0.447	3.889	0.487	0.638
C09B8.14|C09B8.14	0.335	1.59	4.7638	1	1
C09B8.15|C09B8.15	0	0.223	Inf	0.472	0.63
C09B8.16|C09B8.16	0	0.223	Inf	0.472	0.63
C09B8.17|C09B8.17	0	0	NaN	NA	NA
C09B8.18|C09B8.18	0.745	1.34	1.8003	0.194	0.303
C09B8.3|C09B8.3|C09B8.3	124	114	0.9204	6.46e-08	2.12e-07
C09B8.4|C09B8.4|C09B8.4	564	310	0.5485	1.56e-33	1.71e-32
C09B8.5|C09B8.5|C09B8.5	613	497	0.8107	2.4e-23	1.79e-22
C09B8.8|C09B8.8|C09B8.8	12.3	15	1.2192	7.56e-05	0.000193
C09B9.1|C09B9.1|C09B9.1	1.9	3.13	1.6473	0.0174	0.0337
C09B9.2|C09B9.2|C09B9.2	0.495	4.75	9.5994	0.00389	0.00828
C09B9.3|C09B9.3|C09B9.3a	16.6	23.6	1.4193	0.000239	0.000581
C09B9.3|C09B9.3|C09B9.3b	1.31	1.34	1.0245	0.508	0.659
C09B9.4|C09B9.4|C09B9.4	0.266	0.223	0.8388	0.678	0.811
C09B9.7|C09B9.7|C09B9.7	7.37	7.24	0.9815	0.168	0.267
C09B9.80|C09B9.80	1.13	3.41	3.0249	0.414	0.581
C09B9.81|C09B9.81	0	0	NaN	NA	NA
C09B9.82|C09B9.82	0.106	0	0	1	1
C09B9.83|C09B9.83	0	0	NaN	NA	NA
C09B9.84|C09B9.84	0.106	0	0	1	1
C09B9.8|C09B9.8|C09B9.8	115	91.2	0.796	1.87e-07	5.95e-07
C09B9.t1|C09B9.t1	0	3.41	Inf	0.0406	0.0736
C09C7.2|C09C7.2	0	0	NaN	NA	NA
C09D1.4|C09D1.4	0	0	NaN	NA	NA
C09D1.5|C09D1.5	0	0	NaN	NA	NA
C09D4.1|C09D4.1|C09D4.1a	646	600	0.9291	2.65e-05	7.08e-05
C09D4.1|C09D4.1|C09D4.1b	585	570	0.9746	2.01e-26	1.72e-25
C09D4.2|C09D4.2|C09D4.2	193	146	0.7572	3.84e-06	1.11e-05
C09D4.3|C09D4.3|C09D4.3	28.4	52.7	1.8554	0.219	0.337
C09D4.4|C09D4.4|C09D4.4a	1390	1560	1.1259	7.19e-09	2.52e-08
C09D4.4|C09D4.4|C09D4.4b	1380	1550	1.1207	2.05e-09	7.45e-09
C09D4.4|C09D4.4|C09D4.4c	1530	1690	1.1026	3.57e-12	1.53e-11
C09D4.6|C09D4.6|C09D4.6	6.84	9.72	1.4208	1	1
C09D4.8|C09D4.8	0	0	NaN	NA	NA
C09D8.10|C09D8.10	0	0	NaN	NA	NA
C09D8.11|C09D8.11	4.18	1.79	0.4273	0.2	0.311
C09D8.12|C09D8.12	0	0	NaN	NA	NA
C09D8.13|C09D8.13	1.4	0.223	0.1593	0.187	0.293
C09D8.14|C09D8.14	2.7	1.56	0.5785	0.988	1
C09D8.15|C09D8.15	0.915	2.49	2.7167	0.533	0.683
C09D8.2|C09D8.2	0	0	NaN	NA	NA
C09D8.3|C09D8.3	0.123	0.223	1.8214	0.539	0.685
C09D8.4|C09D8.4	0.266	0	0	1	1
C09D8.5|C09D8.5	0	0	NaN	NA	NA
C09D8.6|C09D8.6	0	0	NaN	NA	NA
C09D8.7|C09D8.7	3.19	4.27	1.3379	0.218	0.336
C09D8.8|C09D8.8	3.05	3.6	1.1818	1	1
C09D8.9|C09D8.9	0	0	NaN	NA	NA
C09E7.10|C09E7.10|C09E7.10	7.77	6.95	0.8948	1	1
C09E7.4|C09E7.4|C09E7.4	1360	1400	1.0288	0.000113	0.000284
C09E7.5|C09E7.5|C09E7.5	8.76	10.6	1.2085	0.421	0.588
C09E7.6|C09E7.6|C09E7.6	35.6	46.1	1.2934	0.215	0.332
C09E7.7|C09E7.7|C09E7.7	2470	2590	1.0471	6.16e-05	0.000159
C09E7.8|C09E7.8|C09E7.8a	595	529	0.8905	2.15e-05	5.78e-05
C09E7.8|C09E7.8|C09E7.8b	577	499	0.864	8.91e-05	0.000226
C09E7.9|C09E7.9|C09E7.9	385	336	0.8725	1.82e-06	5.36e-06
C09E8.1|C09E8.1|C09E8.1a	952	812	0.8523	0.00272	0.0059
C09E8.1|C09E8.1|C09E8.1b	843	708	0.8401	0.00042	0.000994
C09E9.1|C09E9.1|C09E9.1	362	494	1.3657	0.557	0.702
C09F12.2|C09F12.2|C09F12.2	20.7	15.9	0.7682	0.18	0.284
C09F12.3|C09F12.3|C09F12.3	16.1	19.2	1.1917	1.05e-05	2.91e-05
C09F12.6|C09F12.6	21.1	57.7	2.7327	0.555	0.701
C09F5.1|C09F5.1|C09F5.1	1580	1740	1.1031	1.19e-06	3.56e-06
C09F5.3|C09F5.3|C09F5.3	28.7	39.8	1.3846	0.000111	0.00028
C09F9.1|C09F9.1|C09F9.1	20.3	63.6	3.1328	0.00583	0.0121
C09F9.2|C09F9.2|C09F9.2	5440	6660	1.2243	9.25e-147	7.48e-145
C09F9.4|C09F9.4	935	826	0.8827	2.43e-66	6.16e-65
C09F9.7|C09F9.7	78.8	89.8	1.1389	3.59e-10	1.36e-09
C09F9.8|C09F9.8	2.43	4.5	1.8512	0.14	0.228
C09G1.2|C09G1.2|C09G1.2	17	10.6	0.6242	0.957	1
C09G1.3|C09G1.3|C09G1.3	6.6	2.9	0.4398	1	1
C09G1.4|C09G1.4|C09G1.4	337	303	0.9004	0.0168	0.0326
C09G1.5|C09G1.5|C09G1.5	280	266	0.9501	0.00213	0.00468
C09G1.6|C09G1.6	0	0	NaN	NA	NA
C09G12.17|C09G12.17|C09G12.17	3.78	3.38	0.8949	1	1
C09G12.18|C09G12.18	0	1.82	Inf	0.232	0.355
C09G12.19|C09G12.19	31	26.7	0.8619	0.0637	0.111
C09G12.5|C09G12.5|C09G12.5	0	0.223	Inf	0.472	0.63
C09G12.t1|C09G12.t1	15.5	9.92	0.6401	0.0514	0.0915
C09G4.2|C09G4.2|C09G4.2a	721	816	1.1326	0.000414	0.000982
C09G4.2|C09G4.2|C09G4.2b	1250	1480	1.1874	1.62e-06	4.79e-06
C09G4.2|C09G4.2|C09G4.2c	945	1060	1.119	2.17e-05	5.84e-05
C09G4.2|C09G4.2|C09G4.2d	2260	2510	1.1107	5.24e-07	1.61e-06
C09G4.4|C09G4.4|C09G4.4	205	115	0.5622	2.91e-15	1.48e-14
C09G5.10|C09G5.10	0	0	NaN	NA	NA
C09G5.11|C09G5.11	0.115	0.223	1.9445	0.536	0.685
C09G5.12|C09G5.12	0	0	NaN	NA	NA
C09G5.7|C09G5.7|C09G5.7	22.9	20.6	0.8983	0.00655	0.0135
C09G5.8|C09G5.8	25.6	85	3.3188	4.39e-06	1.26e-05
C09G5.8|C09G5.8|C09G5.8a	556	778	1.4005	1.92e-79	6.38e-78
C09G5.8|C09G5.8|C09G5.8b	479	703	1.4666	2.43e-73	7.22e-72
C09G9.1|C09G9.1|C09G9.1	1780	1400	0.7856	1.42e-31	1.46e-30
C09G9.2|C09G9.2|C09G9.2a	886	818	0.9238	1.23e-13	5.71e-13
C09G9.2|C09G9.2|C09G9.2b	2600	2440	0.9377	3.05e-36	3.68e-35
C09G9.3|C09G9.3|C09G9.3a	21	23.9	1.1379	0.0681	0.118
C09G9.3|C09G9.3|C09G9.3b	19.1	23.7	1.2404	0.125	0.206
C09G9.5|C09G9.5|C09G9.5a	127	128	1.0077	4.17e-12	1.78e-11
C09G9.5|C09G9.5|C09G9.5b	61.8	62.8	1.0162	8.7e-07	2.64e-06
C09G9.8|C09G9.8|C09G9.8a	0.106	0.67	6.3264	0.425	0.593
C09G9.8|C09G9.8|C09G9.8b	0.106	0.447	4.2176	0.487	0.638
C09G9.9|C09G9.9	0.106	0	0	1	1
C09H10.10|C09H10.10|C09H10.10	272	225	0.8257	0.146	0.236
C09H10.11|C09H10.11	0.257	0.447	1.7359	0.573	0.715
C09H10.12|C09H10.12	0.115	0	0	1	1
C09H10.13|C09H10.13	0.581	1.12	1.9225	0.384	0.547
C09H10.14|C09H10.14	0	0	NaN	NA	NA
C09H10.15|C09H10.15	0.106	0	0	1	1
C09H10.16|C09H10.16	0	0	NaN	NA	NA
C09H10.17|C09H10.17	0.257	0	0	1	1
C09H10.18|C09H10.18	0.115	0	0	1	1
C09H10.5|C09H10.5|C09H10.5	377	559	1.4852	0.313	0.458
C09H10.7|C09H10.7|C09H10.7	550	548	0.9953	2.31e-19	1.43e-18
C09H10.9|C09H10.9|C09H10.9	12.5	11.4	0.9135	0.101	0.17
C09H5.1|C09H5.1|C09H5.1	0	0	NaN	NA	NA
C09H5.7|C09H5.7|C09H5.7	0.123	0.223	1.8214	0.539	0.685
C10A4.10|C10A4.10|C10A4.10	41.3	34.2	0.8283	0.00358	0.00764
C10A4.11|C10A4.11	0.115	0	0	1	1
C10A4.12|C10A4.12	0	0	NaN	NA	NA
C10A4.1|C10A4.1|C10A4.1	25	24.8	0.9927	0.428	0.596
C10A4.2|C10A4.2|C10A4.2	0.123	0	0	1	1
C10A4.3|C10A4.3|C10A4.3	165	167	1.0095	0.744	0.876
C10A4.4|C10A4.4|C10A4.4	0.336	1.34	3.9927	0.212	0.327
C10A4.5|C10A4.5|C10A4.5	70.9	74.4	1.0499	0.000708	0.00164
C10A4.6|C10A4.6|C10A4.6	0.625	1.34	2.1435	0.196	0.306
C10A4.7|C10A4.7|C10A4.7	6.4	2.23	0.3493	0.0928	0.157
C10A4.9|C10A4.9|C10A4.9	0.745	0.67	0.9001	0.883	0.999
C10B5.1|C10B5.1|C10B5.1	108	199	1.8525	0.0235	0.0446
C10B5.3|C10B5.3|C10B5.3	182	206	1.1333	2e-10	7.7e-10
C10B5.4|C10B5.4	0	0	NaN	NA	NA
C10C5.10|C10C5.10	0.106	0	0	1	1
C10C5.11|C10C5.11	0	0	NaN	NA	NA
C10C5.1|C10C5.1|C10C5.1a	1020	1340	1.3147	0.0995	0.167
C10C5.1|C10C5.1|C10C5.1b	1000	1320	1.3117	0.098	0.165
C10C5.1|C10C5.1|C10C5.1c	1030	1350	1.306	0.0458	0.0823
C10C5.2|C10C5.2|C10C5.2	21.6	62.8	2.9056	8.98e-18	5.13e-17
C10C5.3|C10C5.3|C10C5.3	455	478	1.0501	0.692	0.824
C10C5.4|C10C5.4|C10C5.4	364	285	0.7834	0.0109	0.0219
C10C5.5|C10C5.5|C10C5.5	458	384	0.8396	4.07e-11	1.63e-10
C10C5.7|C10C5.7|C10C5.7	11.9	11.6	0.9771	0.0252	0.0475
C10C5.9|C10C5.9	0.115	0.223	1.9445	0.536	0.685
C10C6.11|C10C6.11	4.71	7.4	1.5706	0.0284	0.053
C10C6.12|C10C6.12	0	0	NaN	NA	NA
C10C6.3|C10C6.3|C10C6.3	2.33	0.223	0.0957	0.78	0.906
C10C6.6|C10C6.6|C10C6.6	8530	8020	0.9407	4.44e-93	1.84e-91
C10C6.7|C10C6.7|C10C6.7a	50.7	54.3	1.0715	0.0226	0.043
C10C6.7|C10C6.7|C10C6.7b	78.9	66.6	0.8438	0.00257	0.0056
C10C6.8|C10C6.8	3.64	5.61	1.5439	0.129	0.212
C10C6.9|C10C6.9	127	147	1.1617	0.275	0.411
C10E2.1|C10E2.1|C10E2.1	4.18	8.35	2.0001	0.183	0.288
C10E2.2|C10E2.2|C10E2.2	142	170	1.1992	2.15e-28	1.98e-27
C10E2.4|C10E2.4|C10E2.4	19.8	24.6	1.2402	0.389	0.553
C10E2.5|C10E2.5|C10E2.5	14.1	5.81	0.4108	0.135	0.22
C10E2.6|C10E2.6|C10E2.6	4410	5120	1.1604	1.67e-68	4.44e-67
C10E2.7|C10E2.7	0.106	0	0	1	1
C10E2.8|C10E2.8	0	0	NaN	NA	NA
C10F3.10|C10F3.10	0	0	NaN	NA	NA
C10F3.11|C10F3.11	0	0	NaN	NA	NA
C10F3.12|C10F3.12	0	0	NaN	NA	NA
C10F3.13|C10F3.13	0	0.223	Inf	0.472	0.63
C10F3.14|C10F3.14	0.257	0.223	0.8679	0.672	0.805
C10F3.15|C10F3.15	0.106	0.447	4.2176	0.487	0.638
C10F3.16|C10F3.16	0.343	3.41	9.9297	0.414	0.581
C10F3.17|C10F3.17	0.106	0	0	1	1
C10F3.4|C10F3.4|C10F3.4a	1070	919	0.8602	0.045	0.0809
C10F3.4|C10F3.4|C10F3.4b	582	495	0.851	0.432	0.601
C10F3.7|C10F3.7|C10F3.7	601	342	0.5693	0.62	0.762
C10F3.9|C10F3.9	0	0	NaN	NA	NA
C10G11.10|C10G11.10|C10G11.10	6.25	18.6	2.9763	0.0443	0.0797
C10G11.12|C10G11.12	0.221	0	0	1	1
C10G11.13|C10G11.13	0	0.223	Inf	0.472	0.63
C10G11.14|C10G11.14	7.06	3.13	0.4431	0.898	1
C10G11.15|C10G11.15	1.49	3.6	2.4228	0.139	0.227
C10G11.16|C10G11.16	0	0	NaN	NA	NA
C10G11.17|C10G11.17	1.4	0.894	0.6376	1	1
C10G11.1|C10G11.1|C10G11.1	7.91	5.45	0.6889	0.329	0.479
C10G11.6|C10G11.6|C10G11.6	548	482	0.879	0.0694	0.12
C10G11.7|C10G11.7|C10G11.7	23600	42500	1.8024	NaN	NaN
C10G11.8|C10G11.8|C10G11.8	1.91	0.67	0.3508	0.469	0.63
C10G11.9|C10G11.9|C10G11.9	9.58	9.5	0.9914	0.725	0.857
C10G6.51|C10G6.51	0.221	0	0	1	1
C10G6.52|C10G6.52	0.221	0	0	1	1
C10G6.53|C10G6.53	0	0	NaN	NA	NA
C10G8.2|C10G8.2|C10G8.2	2.44	8.38	3.4322	0.142	0.23
C10G8.3|C10G8.3|C10G8.3	4.02	4.94	1.2314	0.167	0.265
C10G8.4|C10G8.4|C10G8.4	2.01	0	0	0.0169	0.0327
C10G8.8|C10G8.8|C10G8.8a	799	817	1.0217	9.48e-21	6.28e-20
C10G8.8|C10G8.8|C10G8.8b	1380	1360	0.9882	2.14e-25	1.75e-24
C10G8.9|C10G8.9	0.318	3.63	11.4345	0.187	0.293
C10G8.t1|C10G8.t1	0.318	3.63	11.4345	0.187	0.293
C10H11.11|C10H11.11	1.86	0.447	0.2398	0.19	0.297
C10H11.12|C10H11.12	7.72	5.87	0.7603	0.269	0.402
C10H11.13|C10H11.13	0.303	0.447	1.475	0.58	0.722
C10H11.14|C10H11.14	1.16	0.67	0.5796	1	1
C10H11.7|C10H11.7|C10H11.7	5.62	4.75	0.8457	0.402	0.568
C10H11.8|C10H11.8|C10H11.8	527	489	0.9273	0.027	0.0507
C11D2.100|C11D2.100	0.106	0.894	8.4351	0.346	0.501
C11D2.101|C11D2.101	0	0	NaN	NA	NA
C11D2.1|C11D2.1|C11D2.1	0	0	NaN	NA	NA
C11D2.2|C11D2.2|C11D2.2	24.9	12.8	0.5125	0.311	0.456
C11D2.3|C11D2.3|C11D2.3	16.8	18.7	1.1149	0.0776	0.133
C11D2.4|C11D2.4|C11D2.4	1310	1130	0.8688	0.000292	0.000703
C11D2.7|C11D2.7|C11D2.7	1370	1020	0.7494	4.62e-39	6.09e-38
C11D2.98|C11D2.98	0	0	NaN	NA	NA
C11D2.99|C11D2.99	0	0.223	Inf	0.472	0.63
C11E4.10|C11E4.10	0	0	NaN	NA	NA
C11E4.11|C11E4.11	0	0	NaN	NA	NA
C11E4.12|C11E4.12	0.457	0.447	0.9773	0.802	0.926
C11E4.13|C11E4.13	0.238	0	0	1	1
C11E4.14|C11E4.14	0.123	0	0	1	1
C11E4.15|C11E4.15	0	0	NaN	NA	NA
C11E4.16|C11E4.16	0.238	0	0	1	1
C11E4.17|C11E4.17	1.34	1.56	1.1665	0.0462	0.0829
C11E4.1|C11E4.1|C11E4.1	339	389	1.1484	3.59e-11	1.45e-10
C11E4.2|C11E4.2|C11E4.2	90.8	84.4	0.9288	4.29e-07	1.33e-06
C11E4.6|C11E4.6|C11E4.6	2290	2530	1.1061	2.31e-115	1.28e-113
C11E4.7|C11E4.7|C11E4.7	3.98	2.68	0.6737	0.273	0.408
C11E4.8|C11E4.8|C11E4.8	9.07	10.6	1.1642	0.202	0.314
C11E4.9|C11E4.9	0.351	0.223	0.636	1	1
C11E4.t1|C11E4.t1	0.229	12.3	53.6872	1.72e-05	4.68e-05
C11G10.10|C11G10.10	0	0	NaN	NA	NA
C11G10.11|C11G10.11	0.123	0.447	3.6429	0.487	0.638
C11G10.12|C11G10.12	0	0	NaN	NA	NA
C11G10.13|C11G10.13	0	0.447	Inf	0.436	0.602
C11G10.1|C11G10.1|C11G10.1	27.8	41.1	1.4752	1.55e-12	6.74e-12
C11G10.2|C11G10.2|C11G10.2	15.3	17.2	1.1267	0.00133	0.00299
C11G10.3|C11G10.3	0	0.447	Inf	0.436	0.602
C11G10.4|C11G10.4	0	0	NaN	NA	NA
C11G10.5|C11G10.5	0	0	NaN	NA	NA
C11G10.6|C11G10.6	0	0	NaN	NA	NA
C11G10.7|C11G10.7	0	0	NaN	NA	NA
C11G10.8|C11G10.8	0	0	NaN	NA	NA
C11G10.9|C11G10.9	0.36	0	0	1	1
C11G10.t1|C11G10.t1	0.343	3.86	11.2306	0.0785	0.135
C11G6.2|C11G6.2|C11G6.2	82.7	105	1.2697	0.000655	0.00152
C11G6.3|C11G6.3|C11G6.3	925	1130	1.2205	0.00284	0.00613
C11G6.5|C11G6.5	0.212	0	0	1	1
C11G6.6|C11G6.6	0	0	NaN	NA	NA
C11H1.10|C11H1.10	0.123	0.223	1.8214	0.539	0.685
C11H1.11|C11H1.11	0	0.223	Inf	0.472	0.63
C11H1.2|C11H1.2|C11H1.2	753	592	0.7854	1.57e-11	6.48e-11
C11H1.3|C11H1.3|C11H1.3	1360	1320	0.9734	0.0691	0.12
C11H1.5|C11H1.5|C11H1.5	18.5	19.2	1.0414	0.713	0.844
C11H1.7|C11H1.7|C11H1.7	293	205	0.7	0.924	1
C11H1.8|C11H1.8|C11H1.8	356	425	1.1953	0.0472	0.0846
C11H1.9|C11H1.9|C11H1.9a	721	642	0.8904	0.000269	0.00065
C11H1.9|C11H1.9|C11H1.9b	656	587	0.8951	0.000316	0.000759
C12C8.2|C12C8.2|C12C8.2a	333	274	0.8235	9.87e-08	3.19e-07
C12C8.2|C12C8.2|C12C8.2b	161	149	0.9239	3.28e-07	1.02e-06
C12C8.5|C12C8.5	1.24	13.2	10.6562	0.0509	0.0908
C12C8.6|C12C8.6	0	0	NaN	NA	NA
C12C8.7|C12C8.7	1.24	13.2	10.6562	0.0509	0.0908
C12C8.t1|C12C8.t1	0.904	13	14.3534	0.0272	0.051
C12C8.t2|C12C8.t2	0.904	13	14.3534	0.0272	0.051
C12C8.t3|C12C8.t3	0.904	13	14.3534	0.0272	0.051
C12C8.t4|C12C8.t4	0.904	13	14.3534	0.0272	0.051
C12C8.t5|C12C8.t5	0.904	13	14.3534	0.0272	0.051
C12C8.t6|C12C8.t6	0.904	13	14.3534	0.0272	0.051
C12D12.10|C12D12.10	0	0.67	Inf	0.373	0.534
C12D12.1|C12D12.1|C12D12.1a	641	497	0.7753	0.00257	0.0056
C12D12.1|C12D12.1|C12D12.1b	538	436	0.8102	0.000129	0.000321
C12D12.1|C12D12.1|C12D12.1c	654	511	0.7822	0.0014	0.00313
C12D12.3|C12D12.3|C12D12.3	63.5	47.8	0.752	0.36	0.518
C12D12.4|C12D12.4|C12D12.4	0	0.447	Inf	0.436	0.602
C12D12.7|C12D12.7	2.11	4.05	1.9223	0.11	0.183
C12D12.9|C12D12.9	0	0.447	Inf	0.436	0.602
C12D5.10|C12D5.10|C12D5.10	12.1	1.79	0.1474	5.65e-06	1.6e-05
C12D5.3|C12D5.3|C12D5.3	10.4	19.8	1.9069	3.49e-07	1.09e-06
C12D5.4|C12D5.4|C12D5.4	3.5	3.83	1.092	0.858	0.976
C12D5.5|C12D5.5|C12D5.5	1.76	2.01	1.1449	0.235	0.359
C12D5.9|C12D5.9|C12D5.9	33	13	0.3949	3.59e-06	1.03e-05
C12D8.13|C12D8.13|C12D8.13	1.83	1.12	0.6095	0.533	0.683
C12D8.15|C12D8.15|C12D8.15	12.9	16.6	1.2859	2.92e-05	7.75e-05
C12D8.1|C12D8.1	2210	2420	1.0973	3.28e-11	1.32e-10
C12D8.1|C12D8.1|C12D8.1a	2330	2590	1.1104	5.72e-11	2.28e-10
C12D8.1|C12D8.1|C12D8.1b	2440	2690	1.1029	2.31e-07	7.32e-07
C12D8.1|C12D8.1|C12D8.1c	6820	7550	1.1067	8.32e-27	7.26e-26
C12D8.20|C12D8.20|C12D8.20	0.274	0	0	1	1
C12D8.21|C12D8.21|C12D8.21a	4.18	4.47	1.069	0.126	0.207
C12D8.21|C12D8.21|C12D8.21b	0.115	0.223	1.9445	0.536	0.685
C12D8.22|C12D8.22	0	0	NaN	NA	NA
C12D8.23|C12D8.23	0	0	NaN	NA	NA
C12D8.24|C12D8.24	0.151	0	0	1	1
C12D8.25|C12D8.25	0	0	NaN	NA	NA
C12D8.2|C12D8.2	0.115	0	0	1	1
C12D8.3|C12D8.3	0.303	0	0	1	1
C12D8.7|C12D8.7	0.531	0.223	0.4203	1	1
C12D8.9|C12D8.9|C12D8.9a	0.418	0.447	1.0694	0.698	0.83
C12D8.9|C12D8.9|C12D8.9b	0.418	0.447	1.0694	0.698	0.83
C13A10.1|C13A10.1|C13A10.1	20.1	32.8	1.6324	4.64e-08	1.54e-07
C13A10.2|C13A10.2|C13A10.2	102	98.6	0.9696	4.1e-09	1.46e-08
C13A10.4|C13A10.4	1.01	5.23	5.1874	0.533	0.683
C13A10.5|C13A10.5	0.345	3.41	9.8956	0.414	0.581
C13A2.10|C13A2.10|C13A2.10	8.23	7.6	0.923	0.00604	0.0125
C13A2.11|C13A2.11|C13A2.11	0.495	9.08	18.3562	0.00146	0.00327
C13A2.12|C13A2.12|C13A2.12	2.36	2.46	1.0434	0.0563	0.0995
C13A2.1|C13A2.1|C13A2.1	0.964	2.68	2.7803	0.00427	0.00905
C13A2.2|C13A2.2|C13A2.2	0	0	NaN	NA	NA
C13A2.3|C13A2.3|C13A2.3	18.6	18.5	0.999	5.54e-08	1.82e-07
C13A2.4|C13A2.4|C13A2.4	0	0	NaN	NA	NA
C13A2.5|C13A2.5|C13A2.5	4.47	17.9	3.9941	6.63e-10	2.48e-09
C13A2.6|C13A2.6|C13A2.6	0.123	0	0	1	1
C13A2.7|C13A2.7|C13A2.7	0.151	0.223	1.475	0.552	0.697
C13A2.7|C13A2.7|C13A2.7b	0.418	0.67	1.6041	0.551	0.697
C13A2.8|C13A2.8	0	0	NaN	NA	NA
C13A2.9|C13A2.9|C13A2.9	0.115	0.223	1.9445	0.536	0.685
C13B4.1|C13B4.1|C13B4.1a	665	655	0.9847	0.0063	0.013
C13B4.1|C13B4.1|C13B4.1b	1300	1280	0.9912	0.000534	0.00125
C13B4.5|C13B4.5	0.424	3.63	8.5758	0.295	0.437
C13B4.6|C13B4.6	0	0	NaN	NA	NA
C13B4.t1|C13B4.t1	0.318	3.63	11.4345	0.187	0.293
C13B7.6|C13B7.6|C13B7.6	349	653	1.8699	9.3e-42	1.33e-40
C13B9.2|C13B9.2|C13B9.2	269	252	0.9352	2.59e-08	8.73e-08
C13B9.3|C13B9.3|C13B9.3	2020	2510	1.2431	0.0306	0.0568
C13B9.5|C13B9.5	0.106	0	0	1	1
C13C12.2|C13C12.2|C13C12.2	519	519	0.9995	1.24e-24	9.84e-24
C13C12.4|C13C12.4	0	0	NaN	NA	NA
C13C12.5|C13C12.5	0	0	NaN	NA	NA
C13C12.6|C13C12.6	5.09	5.58	1.0979	0.0354	0.0649
C13C4.10|C13C4.10	0	0.447	Inf	0.436	0.602
C13C4.11|C13C4.11	1.32	1.34	1.0125	0.102	0.172
C13C4.12|C13C4.12	0.589	1.34	2.2766	0.218	0.337
C13C4.4|C13C4.4|C13C4.4	280	278	0.9911	0.879	0.995
C13C4.5|C13C4.5|C13C4.5	1020	953	0.93	1.13e-39	1.51e-38
C13C4.6|C13C4.6|C13C4.6	63.2	84.6	1.3394	0.154	0.247
C13C4.7|C13C4.7|C13C4.7	61.1	50.3	0.8243	0.0051	0.0107
C13C4.8|C13C4.8|C13C4.8	3.7	1.34	0.3619	0.573	0.715
C13C4.9|C13C4.9	0.335	0.447	1.3356	0.672	0.805
C13D9.13|C13D9.13	0.106	0.447	4.2176	0.487	0.638
C13E3.1|C13E3.1|C13E3.1	527	657	1.248	6.01e-63	1.43e-61
C13F10.1|C13F10.1|C13F10.1a	174	143	0.822	0.221	0.341
C13F10.1|C13F10.1|C13F10.1b	106	95.6	0.9004	0.419	0.587
C13F10.2|C13F10.2|C13F10.2	330	337	1.0195	0.000894	0.00205
C13F10.4|C13F10.4|C13F10.4	4360	4910	1.1273	5.63e-14	2.67e-13
C13F10.5|C13F10.5|C13F10.5	474	492	1.0387	3.72e-06	1.07e-05
C13F10.6|C13F10.6|C13F10.6	1110	1030	0.9326	1.02e-11	4.26e-11
C13F10.7|C13F10.7|C13F10.7	1920	1650	0.8598	6.28e-31	6.32e-30
C13G3.10|C13G3.10	0	0.223	Inf	0.472	0.63
C13G3.11|C13G3.11	0	0	NaN	NA	NA
C13G3.1|C13G3.1|C13G3.1	107	125	1.1684	3.76e-16	1.99e-15
C13G3.4|C13G3.4	0	0.223	Inf	0.472	0.63
C13G3.5|C13G3.5	0	0.223	Inf	0.472	0.63
C13G3.6|C13G3.6	0	0.223	Inf	0.472	0.63
C13G3.7|C13G3.7	0	0	NaN	NA	NA
C13G3.8|C13G3.8	0.23	0.447	1.9445	0.568	0.711
C13G3.9|C13G3.9	0	0	NaN	NA	NA
C13G5.2|C13G5.2|C13G5.2	579	690	1.192	4.69e-05	0.000122
C13G5.3|C13G5.3	0	0	NaN	NA	NA
C14A11.10|C14A11.10	0.564	0.447	0.7918	0.943	1
C14A11.11|C14A11.11	16.6	18	1.0877	0.93	1
C14A11.2|C14A11.2|C14A11.2	366	333	0.9103	4e-17	2.23e-16
C14A11.5|C14A11.5|C14A11.5	158	172	1.0847	2.49e-27	2.22e-26
C14A11.6|C14A11.6|C14A11.6	67.6	74.7	1.104	1.66e-13	7.64e-13
C14A11.9|C14A11.9|C14A11.9	430	390	0.9066	0.881	0.997
C14A4.11|C14A4.11|C14A4.11	2600	2810	1.08	2.43e-23	1.81e-22
C14A4.12|C14A4.12|C14A4.12a	312	332	1.0628	2.96e-24	2.31e-23
C14A4.12|C14A4.12|C14A4.12b	288	300	1.0441	5.43e-24	4.17e-23
C14A4.13|C14A4.13|C14A4.13	15.4	25.9	1.6778	4.57e-05	0.000119
C14A4.14|C14A4.14|C14A4.14	1430	2140	1.4907	6.71e-26	5.62e-25
C14A4.3|C14A4.3|C14A4.3	1140	934	0.8183	1.39e-06	4.15e-06
C14A4.6|C14A4.6|C14A4.6	513	409	0.7984	0.209	0.324
C14A4.7|C14A4.7|C14A4.7a	155	108	0.6949	0.876	0.992
C14A4.7|C14A4.7|C14A4.7b	71.7	47.9	0.6688	0.757	0.887
C14A4.8|C14A4.8|C14A4.8	4.98	4.47	0.8971	0.0555	0.0981
C14A4.9|C14A4.9|C14A4.9	1070	732	0.6831	0.344	0.499
C14A6.10|C14A6.10	8.11	7.37	0.9088	0.194	0.302
C14A6.12|C14A6.12|C14A6.12	0	0	NaN	NA	NA
C14A6.13|C14A6.13|C14A6.13	0.606	0	0	1	1
C14A6.14|C14A6.14	0.352	0	0	1	1
C14A6.15|C14A6.15	7.68	1.56	0.2037	0.0495	0.0885
C14A6.2|C14A6.2|C14A6.2	4.28	8.77	2.0485	0.00848	0.0172
C14A6.3|C14A6.3|C14A6.3	1.09	8.35	7.6374	3.84e-05	0.000101
C14A6.5|C14A6.5|C14A6.5	0	0	NaN	NA	NA
C14A6.6|C14A6.6|C14A6.6	0.846	0.447	0.528	1	1
C14A6.7|C14A6.7|C14A6.7	0.245	0	0	1	1
C14A6.8|C14A6.8|C14A6.8	2.99	0.447	0.1494	0.0958	0.162
C14A6.9|C14A6.9	0.515	1.34	2.6038	0.187	0.293
[truncated: 32,874 more rows]

## Sheet: L4 stage N2_vs_ADAR,rde-1
Gene ID	Normalized mean counts wildtype	Normalized mean counts ADAR;rde-1 mutants	foldChange ADAR;rde-1 mutant/wildtype	pval	padj
2L52.1|2L52.1|2L52.1	174	319	1.83	7.94e-36	2.2e-35
2L52.2|2L52.2	165	122	0.738	0.000659	0.00104
2RSSE.1|2RSSE.1|2RSSE.1	731	568	0.777	8.84e-11	1.7e-10
2RSSE.2|2RSSE.2|2RSSE.2	200	249	1.25	6.69e-08	1.2e-07
2RSSE.3|2RSSE.3	153	186	1.21	9.66e-06	1.63e-05
2RSSE.4|2RSSE.4	0	0	NaN	NA	NA
2RSSE.5|2RSSE.5	191	142	0.747	0.000556	0.00088
2RSSE.6|2RSSE.6	4.57	1.88	0.411	0.181	0.241
2RSSE.7|2RSSE.7	191	142	0.747	0.000556	0.00088
2RSSE.8|2RSSE.8	0	0	NaN	NA	NA
3R5.2|3R5.2	193	193	0.998	0.918	0.99
4R79.2|4R79.2|4R79.2a	119	178	1.5	4.09e-11	7.94e-11
4R79.2|4R79.2|4R79.2b	116	173	1.5	1.12e-10	2.16e-10
6R55.2|6R55.2|6R55.2	14.3	13.9	0.972	0.98	1
AC3.11|AC3.11	0	0	NaN	NA	NA
AC3.12|AC3.12	29.5	62.3	2.11	9.99e-06	1.69e-05
AC3.13|AC3.13	34.9	74.2	2.13	1.46e-14	3.04e-14
AC3.14|AC3.14	3.62	1.56	0.429	0.188	0.249
AC3.15|AC3.15	0.586	0.298	0.509	1	1
AC3.16|AC3.16	68.5	277	4.05	1.57e-128	8.94e-128
AC3.5|AC3.5|AC3.5	8180	5100	0.623	0	0
AC3.9|AC3.9	438	364	0.83	1.05e-08	1.94e-08
AC7.3|AC7.3|AC7.3	185	309	1.68	2e-10	3.82e-10
AC8.10|AC8.10|AC8.10	212	351	1.66	1.89e-32	5.02e-32
AC8.11|AC8.11|AC8.11	121	183	1.52	1.56e-12	3.12e-12
AC8.12|AC8.12|AC8.12	90.5	87.3	0.964	1	1
AC8.2|AC8.2	61.7	218	3.53	1.58e-60	5.5e-60
AC8.3|AC8.3|AC8.3	212	351	1.66	1.89e-32	5.02e-32
AC8.4|AC8.4|AC8.4	121	183	1.52	1.56e-12	3.12e-12
AC8.5|AC8.5	66.8	110	1.64	3.08e-09	5.73e-09
AC8.6|AC8.6	152	147	0.964	0.554	0.679
AC8.7|AC8.7|AC8.7	90.5	87.3	0.964	1	1
AC8.9|AC8.9	110	202	1.84	3.49e-19	7.82e-19
AH10.2|AH10.2|AH10.2	0.837	0	0	0.777	0.864
AH10.3|AH10.3|AH10.3	32.8	76.1	2.32	1.33e-15	2.82e-15
AH10.4|AH10.4|AH10.4	26.5	11.9	0.45	2.53e-07	4.49e-07
AH10.7|AH10.7	0	0	NaN	NA	NA
AH10.8|AH10.8	0	0	NaN	NA	NA
AH10.9|AH10.9	0	0	NaN	NA	NA
AH6.3|AH6.3|AH6.3	191	512	2.68	2.37e-80	9.65e-80
AH9.1|AH9.1|AH9.1	118	52.6	0.448	1.04e-25	2.54e-25
AH9.3|AH9.3|AH9.3	270	337	1.25	0.000102	0.000166
AH9.4|AH9.4|AH9.4	39.1	17.7	0.453	3.1e-06	5.33e-06
AH9.6|AH9.6|AH9.6	218	98.7	0.452	4.77e-28	1.2e-27
AH9.7|AH9.7|AH9.7	49.9	26.8	0.537	2.07e-08	3.79e-08
B0001.10|B0001.10	0.153	0	0	1	1
B0001.11|B0001.11	1.09	0.298	0.274	0.803	0.889
B0001.12|B0001.12	0.67	0.895	1.34	0.7	0.797
B0001.2|B0001.2|B0001.2	968	2010	2.08	5.18e-233	5.37e-232
B0001.3|B0001.3|B0001.3a	841	1160	1.37	5.36e-46	1.64e-45
B0001.3|B0001.3|B0001.3b	804	1130	1.4	1.82e-48	5.69e-48
B0001.4|B0001.4|B0001.4	1090	1010	0.927	5.64e-05	9.28e-05
B0001.5|B0001.5|B0001.5	616	1100	1.79	5.6e-105	2.74e-104
B0001.6|B0001.6|B0001.6	2860	3350	1.17	7.69e-33	2.05e-32
B0001.7|B0001.7|B0001.7	572	1280	2.23	5.36e-177	4.13e-176
B0001.8|B0001.8|B0001.8	1530	2410	1.57	8.23e-137	4.92e-136
B0019.2|B0019.2|B0019.2	930	1810	1.95	3.97e-203	3.55e-202
B0024.10|B0024.10|B0024.10	1510	2270	1.5	2.64e-85	1.12e-84
B0024.11|B0024.11|B0024.11	1400	1600	1.14	2.71e-10	5.18e-10
B0024.13|B0024.13|B0024.13a	784	609	0.777	3.31e-32	8.76e-32
B0024.13|B0024.13|B0024.13b	728	564	0.774	8.32e-31	2.17e-30
B0024.15|B0024.15|B0024.15	400	84.7	0.212	5.03e-162	3.53e-161
B0024.17|B0024.17	0	0	NaN	NA	NA
B0024.18|B0024.18	0	0.32	Inf	0.624	0.725
B0024.3|B0024.3|B0024.3	175	60.4	0.345	9.69e-45	2.93e-44
B0024.4|B0024.4|B0024.4	754	126	0.167	0	0
B0025.4|B0025.4|B0025.4	738	542	0.734	2.82e-37	7.92e-37
B0025.5|B0025.5|B0025.5	143	306	2.15	7.71e-29	1.96e-28
B0025.6|B0025.6	0.335	0	0	1	1
B0034.10|B0034.10	0	0	NaN	NA	NA
B0034.11|B0034.11	0	0.618	Inf	0.599	0.723
B0034.12|B0034.12	0	0	NaN	NA	NA
B0034.13|B0034.13	4.58	4.63	1.01	1	1
B0034.14|B0034.14	0	0	NaN	NA	NA
B0034.15|B0034.15	0.153	0	0	1	1
B0034.16|B0034.16	0.67	0	0	1	1
B0034.17|B0034.17	0.333	0.64	1.92	0.838	0.919
B0034.1|B0034.1|B0034.1	317	225	0.71	2.04e-05	3.42e-05
B0034.2|B0034.2|B0034.2	0.305	0.618	2.02	0.826	0.908
B0034.4|B0034.4|B0034.4	60	178	2.97	1.43e-37	4.04e-37
B0034.5|B0034.5|B0034.5	107	119	1.11	0.932	1
B0034.7|B0034.7|B0034.7	120	45.7	0.381	8.73e-31	2.28e-30
B0034.8|B0034.8	0.67	0	0	1	1
B0034.9|B0034.9	0	0.618	Inf	0.599	0.723
B0035.11|B0035.11|B0035.11	2100	2230	1.06	0.000842	0.00132
B0035.12|B0035.12|B0035.12	4510	7440	1.65	0	0
B0035.13|B0035.13|B0035.13	2260	826	0.366	0	0
B0035.15|B0035.15|B0035.15	1200	692	0.575	1.9e-146	1.2e-145
B0035.16|B0035.16|B0035.16	669	441	0.659	6.44e-57	2.17e-56
B0035.18|B0035.18|B0035.18	190	159	0.836	3.82e-08	6.95e-08
B0035.19|B0035.19	0.472	0.64	1.36	1	1
B0035.1|B0035.1|B0035.1a	1350	987	0.729	1.27e-41	3.72e-41
B0035.1|B0035.1|B0035.1b	1700	1250	0.733	5.37e-50	1.71e-49
B0035.3|B0035.3|B0035.3	1030	647	0.63	2.01e-83	8.42e-83
B0035.6|B0035.6|B0035.6	882	1510	1.71	9.76e-103	4.69e-102
B0041.10|B0041.10	0	0	NaN	NA	NA
B0041.1|B0041.1|B0041.1	103	146	1.42	0.107	0.146
B0041.3|B0041.3|B0041.3	238	151	0.632	6.42e-24	1.54e-23
B0041.5|B0041.5|B0041.5	993	1290	1.3	3.7e-15	7.78e-15
B0041.8|B0041.8|B0041.8	1590	1050	0.657	8.1e-119	4.33e-118
B0041.9|B0041.9	0	0	NaN	NA	NA
B0198.10|B0198.10	0	0	NaN	NA	NA
B0198.2|B0198.2|B0198.2a	69	81	1.17	0.000612	0.000966
B0198.2|B0198.2|B0198.2b	48.3	63.8	1.32	3.97e-05	6.58e-05
B0198.3|B0198.3	39.4	61.4	1.56	2.14e-05	3.59e-05
B0198.3|B0198.3|B0198.3a	369	653	1.77	2.12e-64	7.65e-64
B0198.4|B0198.4	0	0	NaN	NA	NA
B0198.5|B0198.5	0	0	NaN	NA	NA
B0198.6|B0198.6	0	0	NaN	NA	NA
B0198.7|B0198.7	0	0	NaN	NA	NA
B0198.8|B0198.8	0	0	NaN	NA	NA
B0198.9|B0198.9	0	0	NaN	NA	NA
B0205.10|B0205.10|B0205.10	1270	3590	2.82	0	0
B0205.11|B0205.11|B0205.11	2000	920	0.459	0	0
B0205.12|B0205.12|B0205.12	201	82.6	0.411	6.02e-44	1.81e-43
B0205.13|B0205.13|B0205.13	252	130	0.514	1.29e-31	3.39e-31
B0205.14|B0205.14|B0205.14	18.7	7.8	0.416	2.17e-05	3.62e-05
B0205.15|B0205.15	0	0	NaN	NA	NA
B0205.16|B0205.16	0	0.298	Inf	0.623	0.725
B0205.1|B0205.1|B0205.1a	675	1160	1.71	1.18e-83	4.93e-83
B0205.1|B0205.1|B0205.1b	1540	2550	1.65	9.49e-158	6.47e-157
B0205.4|B0205.4|B0205.4	632	64	0.101	0	0
B0205.5|B0205.5|B0205.5	14	7.08	0.507	0.0134	0.0196
B0205.6|B0205.6|B0205.6	1540	1120	0.727	3.59e-44	1.08e-43
B0205.8|B0205.8|B0205.8	452	361	0.799	1.46e-10	2.81e-10
B0205.9|B0205.9|B0205.9	455	835	1.83	4.63e-77	1.84e-76
B0207.10|B0207.10|B0207.10	42.9	10.2	0.237	4.11e-16	8.79e-16
B0207.11|B0207.11|B0207.11	107	284	2.65	6.74e-44	2.02e-43
B0207.13|B0207.13	12.6	8.01	0.637	0.0631	0.0879
B0207.14|B0207.14	0	0.298	Inf	0.623	0.725
B0207.15|B0207.15	0.153	0	0	1	1
B0207.16|B0207.16	0	0	NaN	NA	NA
B0207.1|B0207.1|B0207.1	134	588	4.39	3.91e-203	3.49e-202
B0207.2|B0207.2|B0207.2	191	76.5	0.401	1.68e-37	4.72e-37
B0207.5|B0207.5|B0207.5	12.2	76.6	6.26	1.21e-42	3.58e-42
B0207.6|B0207.6|B0207.6	645	470	0.728	1.54e-34	4.19e-34
B0207.7|B0207.7|B0207.7	219	741	3.38	4.11e-181	3.23e-180
B0207.8|B0207.8|B0207.8	0.502	0	0	1	1
B0207.9|B0207.9|B0207.9	100	217	2.16	6.98e-20	1.58e-19
B0212.3|B0212.3|B0212.3	146	223	1.52	8.8e-13	1.77e-12
B0212.4|B0212.4|B0212.4a	330	361	1.09	0.0562	0.0786
B0212.4|B0212.4|B0212.4b	319	350	1.1	0.0508	0.0713
B0212.4|B0212.4|B0212.4c	353	379	1.07	0.0982	0.134
B0212.6|B0212.6|B0212.6	34.2	84.2	2.46	4.78e-18	1.06e-17
B0212.7|B0212.7	0.251	0	0	1	1
B0212.8|B0212.8	0	0	NaN	NA	NA
B0212.9|B0212.9	0	0	NaN	NA	NA
B0212.t1|B0212.t1	0	0	NaN	NA	NA
B0213.18|B0213.18	14.3	13.8	0.967	0.731	0.82
B0213.21|B0213.21	0.742	0	0	0.844	0.925
B0213.22|B0213.22	1.56	5.56	3.57	0.00895	0.0132
B0213.23|B0213.23	1.16	0.895	0.771	1	1
B0213.24|B0213.24	17	21.4	1.26	0.455	0.57
B0213.25|B0213.25	0	0	NaN	NA	NA
B0218.5|B0218.5|B0218.5	139	440	3.17	1.5e-104	7.34e-104
B0218.7|B0218.7|B0218.7	282	929	3.3	1.74e-218	1.68e-217
B0222.10|B0222.10|B0222.10	5.37	26.5	4.92	2.3e-12	4.58e-12
B0222.11|B0222.11|B0222.11	136	88.7	0.651	2.58e-11	5.03e-11
B0222.14|B0222.14	0.643	0.298	0.464	1	1
B0222.1|B0222.1|B0222.1	166	94.9	0.572	7.6e-10	1.44e-09
B0222.2|B0222.2|B0222.2	3.36	1.56	0.463	0.188	0.249
B0222.3|B0222.3|B0222.3	155	285	1.83	1.66e-39	4.78e-39
B0222.5|B0222.5|B0222.5	745	477	0.641	3.77e-39	1.08e-38
B0222.9|B0222.9|B0222.9	913	1260	1.38	1.66e-12	3.32e-12
B0228.1|B0228.1|B0228.1	794	55.1	0.0694	0	0
B0228.6|B0228.6|B0228.6	115	30.4	0.264	1.72e-41	5.05e-41
B0228.7|B0228.7|B0228.7	3190	2320	0.727	2.25e-142	1.39e-141
B0228.8|B0228.8|B0228.8	3.66	1.88	0.513	0.181	0.241
B0228.9|B0228.9|B0228.9	2.86	4.92	1.72	0.208	0.275
B0228.t1|B0228.t1	0	0.298	Inf	0.623	0.725
B0238.10|B0238.10|B0238.10	2840	2350	0.829	1.43e-29	3.66e-29
B0238.11|B0238.11|B0238.11	3470	2030	0.584	0	0
B0238.12|B0238.12|B0238.12	280	48.1	0.172	3.62e-134	2.13e-133
B0238.13|B0238.13|B0238.13	144	100	0.696	2.48e-07	4.39e-07
B0238.15|B0238.15|B0238.15	0	0.895	Inf	0.537	0.66
B0238.18|B0238.18	7.53	4.79	0.637	0.165	0.22
B0238.1|B0238.1|B0238.1	446	365	0.818	1.91e-08	3.51e-08
B0238.7|B0238.7|B0238.7	1.81	0.64	0.354	0.396	0.502
B0238.9|B0238.9|B0238.9	843	2300	2.73	0	0
B0240.5|B0240.5	0.305	0	0	1	1
B0240.6|B0240.6	0	0	NaN	NA	NA
B0244.10|B0244.10|B0244.10	225	174	0.774	1.03e-07	1.84e-07
B0244.11|B0244.11|B0244.11	0.167	0	0	1	1
B0244.13|B0244.13	0.335	1.83	5.47	0.196	0.259
B0244.14|B0244.14	39.2	49.2	1.26	0.000161	0.000261
B0244.4|B0244.4|B0244.4	24.3	5.75	0.236	2.28e-12	4.54e-12
B0244.5|B0244.5|B0244.5	100	73.6	0.736	5.83e-07	1.02e-06
B0244.6|B0244.6|B0244.6	169	97.4	0.577	3.76e-22	8.77e-22
B0244.7|B0244.7|B0244.7	18.8	7.63	0.407	1.19e-05	2.01e-05
B0244.9|B0244.9|B0244.9	191	367	1.92	1.52e-23	3.63e-23
B0244.t1|B0244.t1	0	1.83	Inf	0.207	0.272
B0244.t2|B0244.t2	0.57	0	0	0.984	1
B0244.t3|B0244.t3	0	0	NaN	NA	NA
B0250.11|B0250.11	10.9	25	2.3	4.35e-06	7.45e-06
B0250.12|B0250.12	148	85.8	0.578	5.49e-15	1.15e-14
B0250.14|B0250.14	0	0	NaN	NA	NA
B0250.15|B0250.15	0.251	0.32	1.27	0.766	0.853
B0250.16|B0250.16	0	0	NaN	NA	NA
B0250.17|B0250.17	0	0	NaN	NA	NA
B0250.2|B0250.2|B0250.2	216	90	0.417	8.87e-35	2.42e-34
B0250.3|B0250.3	11000	5290	0.481	0	0
B0250.4|B0250.4|B0250.4	101	123	1.21	0.00449	0.00677
B0250.5|B0250.5|B0250.5	2550	1180	0.462	0	0
B0250.7|B0250.7	243	209	0.858	0.0177	0.0257
B0250.8|B0250.8|B0250.8	5.41	11	2.04	0.0209	0.0302
B0252.1|B0252.1|B0252.1	414	281	0.678	2.2e-24	5.32e-24
B0252.3|B0252.3|B0252.3a	1720	1320	0.769	2.39e-60	8.31e-60
B0252.3|B0252.3|B0252.3b	931	709	0.762	1.2e-34	3.27e-34
B0252.3|B0252.3|B0252.3c	860	661	0.769	5.44e-31	1.42e-30
B0252.5|B0252.5|B0252.5	471	680	1.44	1.5e-09	2.82e-09
B0252.8|B0252.8|B0252.8	264	89.2	0.338	6.48e-63	2.31e-62
B0261.1|B0261.1|B0261.1	1080	1890	1.74	1.02e-161	7.18e-161
B0261.4|B0261.4|B0261.4a	986	783	0.794	1.35e-15	2.85e-15
B0261.4|B0261.4|B0261.4b	876	718	0.819	1.59e-11	3.11e-11
B0261.5|B0261.5|B0261.5	102	237	2.32	2.25e-25	5.49e-25
B0261.6|B0261.6|B0261.6a	208	549	2.64	1.16e-84	4.92e-84
B0261.6|B0261.6|B0261.6b	237	639	2.7	7.56e-103	3.63e-102
B0261.7|B0261.7|B0261.7	898	1090	1.22	5.39e-08	9.75e-08
B0261.8|B0261.8|B0261.8	793	364	0.459	6.89e-151	4.48e-150
B0261.9|B0261.9|B0261.9	3.35	2.13	0.637	0.226	0.296
B0272.3|B0272.3|B0272.3	4040	2530	0.626	2.85e-235	3e-234
B0272.4|B0272.4|B0272.4	990	559	0.564	6.33e-117	3.35e-116
B0273.111|B0273.111	0.153	0	0	1	1
B0273.112|B0273.112	0.333	2.52	7.54	0.129	0.174
B0273.113|B0273.113	0	0	NaN	NA	NA
B0273.114|B0273.114	0.251	0	0	1	1
B0273.1|B0273.1|B0273.1	227	528	2.32	4.09e-64	1.47e-63
B0273.3|B0273.3|B0273.3	680	680	1	0.0108	0.0159
B0280.11|B0280.11|B0280.11	160	656	4.1	4.59e-206	4.17e-205
B0280.13|B0280.13|B0280.13	820	1060	1.29	1.42e-21	3.3e-21
B0280.17|B0280.17|B0280.17	368	1090	2.96	3.35e-232	3.46e-231
B0280.19|B0280.19	0	0	NaN	NA	NA
B0280.20|B0280.20	0	0	NaN	NA	NA
B0280.2|B0280.2|B0280.2	148	250	1.69	8.05e-21	1.85e-20
B0280.6|B0280.6	354	350	0.988	0.0557	0.0779
B0280.7|B0280.7|B0280.7	459	779	1.7	1.38e-68	5.16e-68
B0280.9|B0280.9|B0280.9	1380	1200	0.87	7.06e-08	1.27e-07
B0281.1|B0281.1|B0281.1	4.84	0	0	8.65e-07	1.51e-06
B0281.3|B0281.3|B0281.3	566	247	0.436	4.76e-129	2.72e-128
B0281.4|B0281.4|B0281.4	3.17	26.7	8.44	2.35e-17	5.13e-17
B0281.5|B0281.5|B0281.5a	2.32	1.49	0.643	0.55	0.674
B0281.5|B0281.5|B0281.5b	1.51	0.597	0.394	0.589	0.716
B0281.6|B0281.6|B0281.6	36.2	15.3	0.422	1.1e-09	2.07e-09
B0281.7|B0281.7	0	0.32	Inf	0.624	0.725
B0281.8|B0281.8|B0281.8	5.07	0	0	8.65e-07	1.51e-06
B0284.1|B0284.1|B0284.1	88.4	53.5	0.606	7.85e-05	0.000128
B0284.2|B0284.2|B0284.2	6.09	7.08	1.16	0.651	0.753
B0284.3|B0284.3|B0284.3	114	53.5	0.469	8.42e-22	1.96e-21
B0284.4|B0284.4|B0284.4	4.02	0.597	0.148	0.0585	0.0816
B0284.5|B0284.5	6.7	3.71	0.554	0.03	0.0429
B0284.6|B0284.6	61.2	19.2	0.313	9.31e-13	1.87e-12
B0284.7|B0284.7	0	0	NaN	NA	NA
B0285.11|B0285.11	58.6	245	4.17	1.35e-84	5.69e-84
B0285.12|B0285.12	64.7	18.6	0.287	5.6e-15	1.17e-14
B0285.14|B0285.14	0	0	NaN	NA	NA
B0285.15|B0285.15	0	0	NaN	NA	NA
B0285.16|B0285.16	2.23	2.41	1.08	0.842	0.923
B0285.3|B0285.3|B0285.3	296	324	1.1	0.025	0.0359
B0285.4|B0285.4|B0285.4	1700	830	0.488	1.16e-250	1.31e-249
B0285.6|B0285.6|B0285.6	277	118	0.425	1.49e-61	5.25e-61
B0285.t1|B0285.t1	0.338	0	0	1	1
B0286.1|B0286.1|B0286.1	326	387	1.19	0.00189	0.00292
B0286.3|B0286.3|B0286.3	1280	1420	1.11	1.73e-07	3.08e-07
B0286.8|B0286.8	0	0	NaN	NA	NA
B0286.9|B0286.9	0	0	NaN	NA	NA
B0294.1|B0294.1|B0294.1	354	123	0.348	9.8e-55	3.24e-54
B0294.3|B0294.3|B0294.3	3.79	11.5	3.03	0.00014	0.000227
[truncated: 34,606 more rows]

## Sheet: L4 stage N2_vs_ADAR,rde-4
Gene ID	Normalized mean counts wildtype	Normalized mean counts ADAR;rde-4 mutants	foldChange ADAR;rde-4 mutant/wildtype	pval	padj
[truncated: 34,873 more rows]
